# Supplementary material for: Comprehensive re-analysis of hairpin small RNAs in fungi reveals loci with conserved links
Source: eLife journal article supplement (doi:10.7554/elife.83691), 2022-12-09

### Figure S6

### A. Blast hits of mi/milRNAs within other genomes

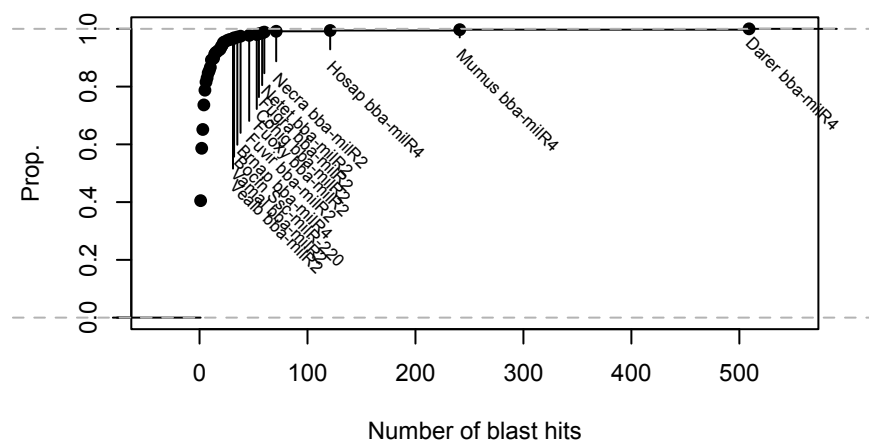

## B. Frequency of genomic occurrences for *bba*-miR4 within other species

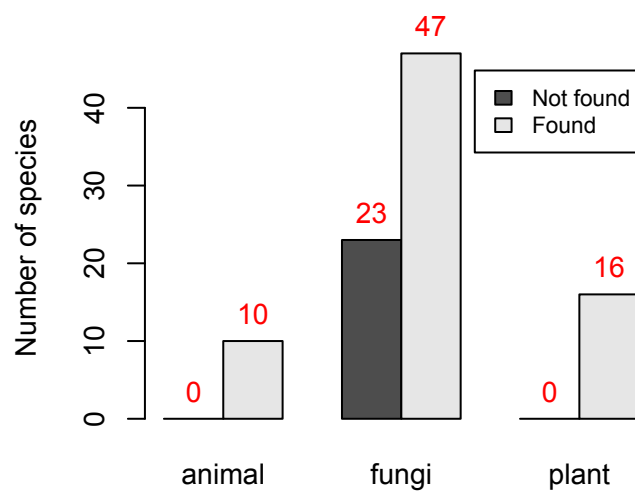

Supplement: supp [file elife_poa_e83691_Figure_3_figure_supplement_1.pdf › elife_poa_e83691_Figure_3_figure_supplement_1.pdf]
