# Supplementary material for: Comprehensive re-analysis of hairpin small RNAs in fungi reveals loci with conserved links
Source: eLife. 2022 Dec 9;11:e83691. doi: 10.7554/eLife.83691 (PMC9757828; doi:10.7554/eLife.83691)
Supplement: Supplementary file 4. — We show identifiers for the miRNAs and miRNA-like (mi/milRNA) locus, citation, and source sRNA-seq library. Locus abundance, hairpin strand abundance, and percent stranding are shown. Other features include the abundance and sequence for the most-abundant sequence determined in this work (MAS), the inferred star for this MAS (MAS*), and the MAS cited in the source publication. Locus and cited MAS designation shown in accordance with Figure 2A. Rule passing is shown as a string, with the rule citation shown with a two-letter prefix (from Supplementary file 6), with the subsequent string pointing to rules passing (1) and failing (0) in numerical order. [file elife-83691-supp4.xlsx]

## Sheet: Description
	Name:	Supplementary File 4
	Title:	Fungal loci expression in source libraries
	Description:	Rules testing data for miRNAs and fungal libraries. We show identifiers for the mi/milRNA locus, citation, and source sRNA-seq library. Locus abundance, hairpin strand abundance, and percent stranding are shown. Other features include the abundance and sequence for the most-abundant sequence determined in this work (MAS), the inferred star for this MAS (MAS*), and the MAS cited in the source publ…

## Sheet: File S4 - rules_testing
# Supplementary File 4 - Fungal loci expression in source libraries
#Locus identifier	Source publication	Species abbreviation	Locus name in source publication	Paralog identifier	Library for assessing abundance	Raw read depth	Locus RPM	Total locus abundance	Abundance of hairpin stranded reads	Percent of reads aligned to hairpin strand	MAS	Inferred pair for MAS	Cited MAS	Cited abundance	Cited pair abundance	MAS abundance	MAS pair abundance	Category of cited/locus abundance compared to observed (Figure 2A)	Loci confirmed in a library (fn-111)	Strings representing what rules are passed (1) and failed (0) for a locus and rule set. Rules are represented in numerical order.
pid	citation	species	parent	paralog	srr	depth	total_aligned_rpm	total_aligned	total_stranded	strand_p	ma_seq	ma._seq	cited_seq	c	c.	ma	ma.	mas_cat	confirmed	fn	mb	ax	ku	ss
PID0027	Zhou2012-iu	Scscl	SS-milR-1		SRR189065	6776221	226.823	1537	696	0.45283	UCUCGAGCCGUAUAGACAGU	UGCCAUUAUACGCUACGCCCCG	UCUCGAGCCGUAUAGACAGUGU	123	0	125	0	2 cited is not ma	No	fn-101	mb-01011	ax-1001011	ku-01	ss-111110001100
PID0028	Zhou2012-iu	Scscl	SS-milR-2		SRR189065	6776221	0	0	0	NA	CUAUAUAAAGGAAAUCCAUC	UGGAUUUCCUUUAUAUAGAG	CUAUAUAAAGGAAAUCCAUC	0	0	0	0	4 locus not expressed	No	fn-001	mb-01011	ax-1011011	ku-00	ss-000110011100
PID0029	Zhou2012-iu	Scscl	SS-milR-C1		SRR189065	6776221	212.36	1439	1331	0.924948	UUUCAGGGACAGGGAGCGGUUG	UGACCGUUUUUUUGACUUCGGGAAGC	UUUCAGGGACAGGGAGCGGUUG	219	0	219	0	1 cited is ma	Yes	fn-111	mb-01011	ax-1011011	ku-11	ss-101111111000
PID0030	Zhou2012-iu	Scscl	SS-milR-C2	a	SRR189065	6776221	511.199	3464	3462	0.999423	GGUGUUGUGGUUUAGUGGUAUAAUUC	AACGUGCAUCAGACUCAACACACUA	GGUGUUGUGGUUUAGUGGUAU	158	0	492	0	2 cited is not ma	Yes	fn-111	mb-01011	ax-1001001	ku-11	ss-101011101100
PID0032	Zhou2012-iu	Scscl	SS-milR-C3		SRR189065	6776221	1.62332	11	11	1	UAGGAGUUUGAUAGGCAAGUU	UUUGAUUGUUAUACUUUUAUC	UAGGAGUUUGAUAGGCAAGU	1	0	5	0	2 cited is not ma	Yes	fn-111	mb-01011	ax-1011011	ku-01	ss-111111111110
PID0033	Zhou2012-iu	Scscl	SS-milR-C4		SRR189065	6776221	0	0	0	NA	UGAGAUGGUAAACUAAGUAAUA	UUACCUCAGUUCUGCCCUAUCAGCU	UGAGAUGGUAAACUAAGUAAUA	0	0	0	0	4 locus not expressed	No	fn-001	mb-01011	ax-1001011	ku-01	ss-000110001100
PID0034	Zhou2012-iu	Scscl	SS-milR-C5		SRR189065	6776221	31.2859	212	201	0.948113	UGGAGUGGAAUUGACGGAUGG	AUUCGCCAAUUGUAAUUCCAGA	UGGAGUGGAAUUGACGGAUGG	29	0	29	0	1 cited is ma	Yes	fn-111	mb-01011	ax-1011011	ku-01	ss-101111111100
PID0036	Zhou2012-iu	Scscl	SS-milR-C7		SRR189065	6776221	0	0	0	NA	UGAGGUAUAUUAUAGAGUUUU	GAUCAAUCAUUUAGUAUACUCUACU	UGAGGUAUAUUAUAGAGUUUU	0	0	0	0	4 locus not expressed	No	fn-001	mb-01011	ax-1000011	ku-01	ss-000100001100
PID0038	Zhou2012-iu	Scscl	SS-milR-C9		SRR189065	6776221	0	0	0	NA	UAAAGUUGAUUGUAAAAGAG	UUUUUAACAUAUCAACAUUUGC	UAAAGUUGAUUGUAAAAGAG	0	0	0	0	4 locus not expressed	No	fn-001	mb-01011	ax-1001011	ku-01	ss-000110001100
PID0039	Zhou2012-iu	Scscl	SS-milR-C10		SRR189065	6776221	0	0	0	NA	UACUGUUAGUUACGAAUUGCAUA	GCAAACCUCGUAACAUCUAGUAGG	UACUGUUAGUUACGAAUUGCAUA	0	0	0	0	4 locus not expressed	No	fn-001	mb-01011	ax-1001011	ku-01	ss-000110001100
PID0040	Zhou2012-iu	Scscl	SS-milR-C11		SRR189065	6776221	3.39422	23	21	0.913043	UGCUCUAGACUCUCGAGGUGG	UACUUCGAGAGCCUAGAGCACU	UGCUCUAGACUCUCGAGGUGG	9	0	9	0	1 cited is ma	Yes	fn-111	mb-01011	ax-1010011	ku-01	ss-111101111110
PID0042	Zhou2012-iu	Scscl	SS-milR-C13		SRR189065	6776221	1.1806	8	3	0.375	UUCUGAUUUUGAUUUCCUUUC	AAGGGGUAGGGGAGUCGGUUAU	UUCUGAUUUUGAUUUCCUUUC	0	0	0	0	3 cited not expressed	No	fn-001	mb-01011	ax-1001011	ku-01	ss-110110001100
PID0043	Zhou2012-iu	Scscl	SS-milR-C14		SRR189065	6776221	0.147575	1	1	1	UCGACGACAGUAUCACAACAACU	UUGUUGUGGCUGUUGAUGGACG	UCGACGACAGUAUCACAACAACU	0	0	0	0	3 cited not expressed	No	fn-011	mb-01011	ax-1011011	ku-01	ss-110111111100
PID0044	Zhou2012-iu	Scscl	SS-milR-C15		SRR189065	6776221	2.3612	16	4	0.25	UGACAAAAAUUAGGGCAGACACC	UGUCUGCCCUAAUUUUUGUCACC	UGACAAAAAUUAGGGCAGACACC	2	0	2	0	1 cited is ma	No	fn-101	mb-01011	ax-1011011	ku-00	ss-111110011110
PID0045	Zhou2012-iu	Scscl	SS-milR-C16	a	SRR189065	6776221	0.147575	1	1	1	UCGACGAGUUGGUGAUACAGG	GCAUUUUGAGAUUCUACAAG	UGUGGAGUAGAAGGUUGCUG	0	0	1	0	3 cited not expressed	No	fn-011	mb-00010	ax-1011111	ku-01	ss-110111111110
PID0046	Zhou2012-iu	Scscl	SS-milR-C16	b	SRR189065	6776221	0	0	0	NA	UGUGGAGUAGAAGGUUGCUG	GCAUUUUGAGAUUCUACAAG	UGUGGAGUAGAAGGUUGCUG	0	0	0	0	4 locus not expressed	No	fn-001	mb-01011	ax-1011011	ku-01	ss-000110011100
PID0047	Zhou2012-iu	Scscl	SS-milR-C16	c	SRR189065	6776221	0	0	0	NA	UGUGGAGUAGAAGGUUGCUG	GCAUUUUGAGAUUCUACAAG	UGUGGAGUAGAAGGUUGCUG	0	0	0	0	4 locus not expressed	No	fn-001	mb-01011	ax-1011011	ku-01	ss-000110011100
PID0048	Zhou2012-iu	Scscl	SS-milR-C16	e	SRR189065	6776221	0	0	0	NA	UGUGGAGUAGAAGGUUGCUG	GCAUUUUGAGAUUCUACAAG	UGUGGAGUAGAAGGUUGCUG	0	0	0	0	4 locus not expressed	No	fn-001	mb-01011	ax-1011011	ku-01	ss-000110011100
PID0049	Zhou2012-iu	Scscl	SS-milR-C16	d	SRR189065	6776221	0	0	0	NA	UGUGGAGUAGAAGGUUGCUG	GCAUUUUGAGAUUCUACAAG	UGUGGAGUAGAAGGUUGCUG	0	0	0	0	4 locus not expressed	No	fn-001	mb-01011	ax-1011011	ku-01	ss-000110011100
PID0050	Zhou2012-iu	Scscl	SS-milR-C17		SRR189065	6776221	0	0	0	NA	GAUGGAUGGAUGGAUGGAUAA	CUCCAACCAUACCAUCCAUCUUCACGCAA	GAUGGAUGGAUGGAUGGAUAA	0	0	0	0	4 locus not expressed	No	fn-001	mb-00011	ax-1000011	ku-01	ss-000100001000
PID0051	Zhou2012-iu	Scscl	SS-milR-C18		SRR189065	6776221	5.903	40	6	0.15	UACUUACCACGAUCUCGGUUUC	UCGAUGUCCUGGUUUGCC	UGGUACUUACCACGAUCUCGG	0	0	1	0	3 cited not expressed	No	fn-001	mb-01111	ax-1011011	ku-01	ss-100111001000
PID0052	Zhou2012-iu	Scscl	SS-milR-C19		SRR189065	6776221	3.68937	25	16	0.64	UAUGUAGGACUUGGUAGGUAUA	UAUCUAUCAUAUCCUACAUCCU	UAUGUAGGACUUGGUAGGUAUA	5	0	5	0	1 cited is ma	No	fn-101	mb-01011	ax-1011011	ku-01	ss-101110111100
PID0053	Zhou2012-iu	Scscl	SS-milR-C20	a	SRR189065	6776221	0	0	0	NA	UGAUGGGGAAGAUGAGAGUU	CUCUCAUCUGAUUCUUCACUCAAC	UGAUGGGGAAGAUGAGAGUU	0	0	0	0	4 locus not expressed	No	fn-001	mb-01011	ax-1011011	ku-01	ss-000110011000
PID0054	Zhou2012-iu	Scscl	SS-milR-C20	b	SRR189065	6776221	0	0	0	NA	UGAUGGGGAAGAUGAGAGUU	CUCUCAUCUGAUUCUUCACUCAAC	UGAUGGGGAAGAUGAGAGUU	0	0	0	0	4 locus not expressed	No	fn-001	mb-01011	ax-1011011	ku-01	ss-000110011000
PID0055	Zhou2012-iu	Scscl	SS-milR-C20	c	SRR189065	6776221	0	0	0	NA	UGAUGGGGAAGAUGAGAGUU	CUCUCAUCUGAUUCUUCACUCAAC	UGAUGGGGAAGAUGAGAGUU	0	0	0	0	4 locus not expressed	No	fn-001	mb-01011	ax-1011011	ku-01	ss-000110011000
PID0056	Zhou2012-iu	Scscl	SS-milR-C20	d	SRR189065	6776221	0	0	0	NA	UGAUGGGGAAGAUGAGAGUU	CUCUCAUCUGAUUCUUCACUCAAC	UGAUGGGGAAGAUGAGAGUU	0	0	0	0	4 locus not expressed	No	fn-001	mb-01011	ax-1011011	ku-01	ss-000110011000
PID0057	Zhou2012-iu	Scscl	SS-milR-C20	e	SRR189065	6776221	0	0	0	NA	UGAUGGGGAAGAUGAGAGUU	CUCUCAUCUGAUUCUUCACUCAAC	UGAUGGGGAAGAUGAGAGUU	0	0	0	0	4 locus not expressed	No	fn-001	mb-01011	ax-1011011	ku-01	ss-000110011000
PID0058	Zhou2012-iu	Scscl	SS-milR-C20	f	SRR189065	6776221	0	0	0	NA	UGAUGGGGAAGAUGAGAGUU	CUCUCAUCUGAUUCUUCACUCAAC	UGAUGGGGAAGAUGAGAGUU	0	0	0	0	4 locus not expressed	No	fn-001	mb-01011	ax-1011011	ku-01	ss-000110011000
PID0059	Zhou2012-iu	Scscl	SS-milR-C20	g	SRR189065	6776221	0	0	0	NA	UGAUGGGGAAGAUGAGAGUU	CUCUCAUCUGAUUCUUCACUCAAC	UGAUGGGGAAGAUGAGAGUU	0	0	0	0	4 locus not expressed	No	fn-001	mb-01011	ax-1011011	ku-01	ss-000110011000
PID0060	Zhou2012-iu	Scscl	SS-milR-C20	h	SRR189065	6776221	0	0	0	NA	UGAUGGGGAAGAUGAGAGUU	CUCUCAUCUGAUUCUUCACUCAAC	UGAUGGGGAAGAUGAGAGUU	0	0	0	0	4 locus not expressed	No	fn-001	mb-01011	ax-1011011	ku-01	ss-000110011000
PID0061	Zhou2012-iu	Scscl	SS-milR-C20	i	SRR189065	6776221	0	0	0	NA	UGAUGGGGAAGAUGAGAGUU	CUCUCAUCUGAUUCUUCACUCAAC	UGAUGGGGAAGAUGAGAGUU	0	0	0	0	4 locus not expressed	No	fn-001	mb-01011	ax-1011011	ku-01	ss-000110011000
PID0062	Zhou2012-iu	Scscl	SS-milR-C20	j	SRR189065	6776221	0	0	0	NA	UGAUGGGGAAGAUGAGAGUU	CUCUCAUCUGAUUCUUCACUCAAC	UGAUGGGGAAGAUGAGAGUU	0	0	0	0	4 locus not expressed	No	fn-001	mb-01011	ax-1011011	ku-01	ss-000110011000
PID0063	Zhou2012-iu	Scscl	SS-milR-C20	k	SRR189065	6776221	0	0	0	NA	UGAUGGGGAAGAUGAGAGUU	CUCUCAUCUGAUUCUUCACUCAAC	UGAUGGGGAAGAUGAGAGUU	0	0	0	0	4 locus not expressed	No	fn-001	mb-01011	ax-1011011	ku-01	ss-000110011000
PID0064	Zhou2012-iu	Scscl	SS-milR-C20	l	SRR189065	6776221	0	0	0	NA	UGAUGGGGAAGAUGAGAGUU	CUCUCAUCUGAUUCUUCACUCAAC	UGAUGGGGAAGAUGAGAGUU	0	0	0	0	4 locus not expressed	No	fn-001	mb-01011	ax-1011011	ku-01	ss-000110011000
PID0067	Zhou2012-iu	Scscl	SS-milR-C23		SRR189065	6776221	0	0	0	NA	UAUGAACGUUUCAGAUUGCUAA	GGUAAUUUGAGGUAUAUA	UAUGAACGUUUCAGAUUGCUAA	0	0	0	0	4 locus not expressed	No	fn-001	mb-01011	ax-1011011	ku-01	ss-000110011000
PID0070	Zhou2012-iu	Scscl	SS-milR-C25		SRR189065	6776221	2.21362	15	15	1	UGUGGAUCUGGAUUUUGGGUAU	GCUUGCAAUUGGGAUCGGGAUU	UGUGGAUCUGGAUUUUGGGUAU	6	0	6	0	1 cited is ma	Yes	fn-111	mb-01011	ax-1011011	ku-01	ss-101111111110
PID0071	Zhou2012-iu	Scscl	SS-milR-C26		SRR189065	6776221	2.06605	14	13	0.928571	UUUGACGCUAGAGGAACUUCU	AUUGCCUCUUGGACGUCAAGGC	UUUGACGCUAGAGGAACUUCU	5	0	5	0	1 cited is ma	Yes	fn-111	mb-01011	ax-1001011	ku-01	ss-101111101100
PID0072	Zhou2012-iu	Scscl	SS-milR-C27		SRR189065	6776221	2.9515	20	16	0.8	UAGAUUUUUCAAGAAGG	UCCUUGAAAAAUCUAUU	UAGAUUUUUCAAGAAGGAUU	5	0	8	0	2 cited is not ma	No	fn-101	mb-01011	ax-1011001	ku-01	ss-101010111100
PID0073	Zhou2012-iu	Scscl	SS-milR-C28		SRR189065	6776221	1.7709	12	11	0.916667	UUUGGAUGUAGUGUGAGGAGUU	CUCCCACUUCGCUCCGGACU	UUUGGAUGUAGUGUGAGGAGUU	6	0	6	0	1 cited is ma	Yes	fn-111	mb-01011	ax-1010011	ku-01	ss-101101101100
PID0074	Zhou2012-iu	Scscl	SS-milR-C29	a	SRR189065	6776221	0	0	0	NA	UAGAUCAAGUAGAAUAUAGGUA	CUAGUAUUCACUUGAAAGU	UAGAUCAAGUAGAAUAUAGGUA	0	0	0	0	4 locus not expressed	No	fn-001	mb-01011	ax-1011011	ku-01	ss-000110011100
PID0075	Zhou2012-iu	Scscl	SS-milR-C29	b	SRR189065	6776221	0	0	0	NA	UAGAUCAAGUAGAAUAUAGGUA	CUGGUAUUCACUUGGAAGU	UAGAUCAAGUAGAAUAUAGGUA	0	0	0	0	4 locus not expressed	No	fn-001	mb-01011	ax-1011011	ku-01	ss-000110011100
PID0077	Zhou2012-iu	Scscl	SS-milR-C29	d	SRR189065	6776221	0	0	0	NA	UAGAUCAAGUAGAAUAUAGGUA	CUGGUAUUCACUUGGAAGU	UAGAUCAAGUAGAAUAUAGGUA	0	0	0	0	4 locus not expressed	No	fn-001	mb-01011	ax-1011011	ku-01	ss-000110011100
PID0079	Zhou2012-iu	Scscl	SS-milR-C30		SRR189065	6776221	1.32817	9	6	0.666667	UGAAAGAUUCUCUGUUGGACGG	GUUUCGAUUUAGAGGAGGUUCUGA	UGAAAGAUUCUCUGUUGGACGG	6	0	6	0	1 cited is ma	No	fn-101	mb-01011	ax-1001011	ku-01	ss-101110101110
PID0080	Zhou2012-iu	Scscl	SS-milR-C31		SRR189065	6776221	0.885449	6	6	1	UGGGACUAAUGCAUAUUUCUUC	GGAUAGUAAUAUUGUUCCGAC	UGGGACUAAUGCAUAUUUCUUC	2	0	2	0	1 cited is ma	Yes	fn-111	mb-01011	ax-1011011	ku-01	ss-111111111110
PID0081	Zhou2012-iu	Scscl	SS-milR-C32		SRR189065	6776221	8.85449	60	59	0.983333	GAAGCCGCACCA	GAACGGAACAAG	UGAGAACUUUAGAUCGGCUGACA	3	0	45	0	2 cited is not ma	Yes	fn-111	mb-01110	ax-1001101	ku-01	ss-101011101110
PID0082	Zhou2012-iu	Scscl	SS-milR-C33		SRR189065	6776221	0.885449	6	6	1	UGAUAGGAAAUGUAUGAAGCGG	GCACGUGCUCCUAUCGAC	UGAUAGGAAAUGUAUGAAGCGG	4	0	4	0	1 cited is ma	Yes	fn-111	mb-01011	ax-1011011	ku-01	ss-111111111010
PID0083	Zhou2012-iu	Scscl	SS-milR-C34		SRR189065	6776221	2.50877	17	17	1	UGUGGGAGAAUAGAUGAGCGUG	UGCUUAAUGCUCUCGAACAUAUC	UGUGGGAGAAUAGAUGAGCGUG	2	0	2	0	1 cited is ma	Yes	fn-111	mb-01011	ax-1011011	ku-01	ss-101111101100
PID0084	Zhou2012-iu	Scscl	SS-milR-C35		SRR189065	6776221	2.3612	16	8	0.5	UGUGGUUUUGAAUUACUCGGCG	CCUCAAGCACCUUCAGUGG	UGUGGUUUUGAAUUACUCGGCG	5	0	5	0	1 cited is ma	No	fn-101	mb-00110	ax-1001011	ku-01	ss-101110001100
PID0085	Zhou2012-iu	Scscl	SS-milR-C36		SRR189065	6776221	1.1806	8	6	0.75	UAACGGCAUAAUAUUAUCUUU	GGAGAAUUGUGCGUUAUU	UAACGGCAUAAUAUUAUCUUU	5	0	5	0	1 cited is ma	No	fn-101	mb-01011	ax-1011011	ku-01	ss-111110111010
PID0086	Zhou2012-iu	Scscl	SS-milR-C37		SRR189065	6776221	0.737874	5	5	1	UGUAUCACUGGAGGAACCGGA	UGUUAGCUCCAUGAUACAAUAAUUUUG	UGUAUCACUGGAGGAACCGGA	3	0	3	0	1 cited is ma	No	fn-011	mb-00010	ax-1000011	ku-01	ss-111101101010
PID0087	Zhou2012-iu	Scscl	SS-milR-C38		SRR189065	6776221	0.885449	6	5	0.833333	UAGACGGCAAAACUCGUAACA	UUACGAGGUUUGCCGUCUAG	UAGACGGCAAAACUCGUAACA	3	0	3	0	1 cited is ma	No	fn-011	mb-01011	ax-1011011	ku-01	ss-101111111100
PID0088	Zhou2012-iu	Scscl	SS-milR-C39		SRR189065	6776221	1.7709	12	8	0.666667	UAGACUUAUAGAGCUUGCGGCA	UCGUUUGGCUCGGAAUCUGGG	UAGACUUAUAGAGCUUGCGGCA	5	0	5	0	1 cited is ma	No	fn-101	mb-01111	ax-1000011	ku-01	ss-101100101100
PID0089	Zhou2012-iu	Scscl	SS-milR-C40		SRR189065	6776221	1.03302	7	6	0.857143	UGAUUGAUCAAAAGACAGCU	CUGCUUGGUUCGUUCAAA	UGAUUGAUCAAAAGACAGCU	5	0	5	0	1 cited is ma	Yes	fn-111	mb-01011	ax-1000011	ku-01	ss-101101101110
PID0090	Zhou2012-iu	Scscl	SS-milR-C41		SRR189065	6776221	2.50877	17	14	0.823529	GACGAUCAGAAC	UCCGACGUUCUC	UGGACAAAGACAGUAACUUCGUG	3	0	4	0	2 cited is not ma	Yes	fn-111	mb-01111	ax-1011001	ku-01	ss-101011111100
PID0091	Zhou2012-iu	Scscl	SS-milR-C42		SRR189065	6776221	0	0	0	NA	UGGGAUUGCUUAGAAGCCAGGGG	CCUGGGAUCUUGGCAGCAUAUG	UGGGAUUGCUUAGAAGCCAGGGG	0	0	0	0	4 locus not expressed	No	fn-001	mb-01011	ax-1011011	ku-01	ss-000110001100
PID0108	Kang2013-jt	Trree	Tre-milR-1		SRR847119	7102386	0.844787	6	6	1	AGCCGGCUGUUGACGUAGGUGA	GCCGAACGUGUUGAAGCCCGCGC	AGCCGGCUGUUGACGUAGGUGA	3	0	3	0	1 cited is ma	Yes	fn-111	mb-01010	ax-1001111	ku-01	ss-111111101110
PID0108	Kang2013-jt	Trree	Tre-milR-1		SRR847118	2497934	0	0	0	NA	AGCCGGCUGUUGACGUAGGUGA	GCCGAACGUGUUGAAGCCCGCGC	AGCCGGCUGUUGACGUAGGUGA	0	0	0	0	4 locus not expressed	No	fn-001	mb-01010	ax-1001011	ku-01	ss-000110001100
PID0109	Kang2013-jt	Trree	Tre-milR-2		SRR847119	7102386	1.68957	12	12	1	UCUCUGUUGGAGUUGAGGGGG	UCGUUUACUUUCGACGGGGUAACU	UCUCUGUUGGAGUUGAGGGGG	3	0	3	0	1 cited is ma	No	fn-011	mb-01011	ax-1011011	ku-01	ss-101111111100
PID0109	Kang2013-jt	Trree	Tre-milR-2		SRR847118	2497934	0	0	0	NA	UCUCUGUUGGAGUUGAGGGGG	UCGUUUACUUUCGACGGGGUAAC	UCUCUGUUGGAGUUGAGGGGG	0	0	0	0	4 locus not expressed	No	fn-001	mb-01011	ax-1011011	ku-01	ss-000110011100
PID0110	Kang2013-jt	Trree	Tre-milR-3		SRR847119	7102386	14.7838	105	105	1	GGGAGAAUGCGCCGUGAUUGU	UUUCACGCCGCCUUCUCUUUU	GGGAGAAUGCGCCGUGAUUGU	45	0	45	0	1 cited is ma	Yes	fn-111	mb-01011	ax-1011111	ku-01	ss-101111111110
PID0110	Kang2013-jt	Trree	Tre-milR-3		SRR847118	2497934	18.0149	45	45	1	GGGAGAAUGCGCCGUGAUUGU	UUUCACGCCGCCUUCUCUUUU	GGGAGAAUGCGCCGUGAUUGU	11	0	11	0	1 cited is ma	Yes	fn-111	mb-01011	ax-1011011	ku-01	ss-101111111110
PID0111	Kang2013-jt	Trree	Tre-milR-4		SRR847119	7102386	166.564	1183	1169	0.988166	AGCAGCGACGGCGGAACUCUGC	AGCCUCCUCGUGCAGCUGC	AGCAGCGACGGCGGAACUCUGC	520	0	520	0	1 cited is ma	Yes	fn-111	mb-01011	ax-1011011	ku-11	ss-111111101110
PID0111	Kang2013-jt	Trree	Tre-milR-4		SRR847118	2497934	0	0	0	NA	AGCAGCGACGGCGGAACUCUGC	AGCCUCCUCGUGCAGCUGC	AGCAGCGACGGCGGAACUCUGC	0	0	0	0	4 locus not expressed	No	fn-001	mb-01011	ax-1011011	ku-01	ss-000110001100
PID0112	Kang2013-jt	Trree	Tre-milR-5		SRR847119	7102386	26.3292	187	178	0.951872	CCCCGUUUAUCUGAUCAACGC	GGAGAUGUAAGAGGUC	CCCGUUUAUCUGAUCAACGCCG	2	0	66	0	2 cited is not ma	Yes	fn-111	mb-01011	ax-1001011	ku-01	ss-111111101010
PID0112	Kang2013-jt	Trree	Tre-milR-5		SRR847118	2497934	14.0116	35	34	0.971429	CCCCGUUUAUCUGAUCAACGCC	GGGAGAUGUAAGAGGUC	CCCGUUUAUCUGAUCAACGCCG	0	0	9	0	3 cited not expressed	Yes	fn-111	mb-01011	ax-1001011	ku-01	ss-111111101000
PID0113	Kang2013-jt	Trree	Tre-milR-6		SRR847118	2497934	4.40364	11	11	1	CUACGGAGCUGGAGGAGGA	CGCCUACUACGACUCCGCCUGC	CGGAGCUGGAGGAGGACUGCGA	0	0	2	0	3 cited not expressed	Yes	fn-111	mb-01010	ax-1001001	ku-01	ss-101011101100
PID0113	Kang2013-jt	Trree	Tre-milR-6		SRR847119	7102386	9.29265	66	66	1	ACUACGGAGCUGGAGGAGGACUGCG	CCCCCGCCUACUACGACUCCGCCUGCC	CGGAGCUGGAGGAGGACUGCGA	2	0	3	0	2 cited is not ma	Yes	fn-111	mb-01010	ax-1001001	ku-01	ss-101011101100
PID0114	Kang2013-jt	Trree	Tre-milR-7		SRR847118	2497934	1.60132	4	2	0.5	UCAAGGGGAAUCUGAGGCAG	UCAGGACGGGCUGGGU	UCAAGGGGAAUCUGAGGCAG	1	0	1	0	1 cited is ma	No	fn-001	mb-00111	ax-1001011	ku-01	ss-110110101000
PID0114	Kang2013-jt	Trree	Tre-milR-7		SRR847119	7102386	0.985584	7	1	0.142857	AGGGGAAUCUGAGGCAGCGCA	UGCUUCAGGACGGGCUG	UCAAGGGGAAUCUGAGGCAG	0	0	1	0	3 cited not expressed	No	fn-001	mb-01011	ax-1001011	ku-01	ss-100111001000
PID0116	Kang2013-jt	Trree	Tre-milR-9		SRR847119	7102386	1.68957	12	12	1	UGGCAUGUUAGACAAGUUGCG	CAAGAGAUGAUCCGGAUGCCAUU	UGGCAUGUUAGACAAGUUGCG	5	0	5	0	1 cited is ma	Yes	fn-111	mb-01011	ax-1001011	ku-01	ss-111111101100
PID0116	Kang2013-jt	Trree	Tre-milR-9		SRR847118	2497934	0	0	0	NA	UGGCAUGUUAGACAAGUUGCG	CAAGAGAUGAUCCGGAUGCCAUU	UGGCAUGUUAGACAAGUUGCG	0	0	0	0	4 locus not expressed	No	fn-001	mb-01011	ax-1001011	ku-01	ss-000110001100
PID0117	Kang2013-jt	Trree	Tre-milR-10		SRR847118	2497934	34.0281	85	64	0.752941	UGCAGGAGGCUGUACUGUAGG	UCAGUGUGUCACGCGGC	AGGCUGUACUGUAGGGCAG	2	0	9	0	2 cited is not ma	No	fn-101	mb-01011	ax-1011011	ku-01	ss-111110111000
PID0117	Kang2013-jt	Trree	Tre-milR-10		SRR847119	7102386	791.987	5625	4006	0.712178	UAGGGCAGCGCAAGGAAGUCGA	GGUCUCAGUGUGUCA	AGGCUGUACUGUAGGGCAG	3	0	339	0	2 cited is not ma	No	fn-101	mb-00110	ax-1011011	ku-11	ss-111110111000
PID0118	Kang2013-jt	Trree	Tre-milR-11		SRR847118	2497934	0.400331	1	1	1	UGGAGACGUGGAGCCGGA	AGCCCGCGGAAUCUAAU	UGGAGACGUGGAGCCGGA	1	0	1	0	1 cited is ma	No	fn-011	mb-01011	ax-1011101	ku-01	ss-100011101110
PID0118	Kang2013-jt	Trree	Tre-milR-11		SRR847119	7102386	0.281596	2	1	0.5	UUUGGAGACGUGGAGCCGGA	AGCCCGCGGAAUCUAAUGA	UGGAGACGUGGAGCCGGA	0	0	1	0	3 cited not expressed	No	fn-001	mb-01011	ax-1001011	ku-01	ss-100110101100
PID0119	Kang2013-jt	Trree	Tre-milR-12		SRR847119	7102386	0.703989	5	5	1	GGUGCGGGCUGGCGGCGG	GCCGCGGGCCAAGGACGAC	GGUGCGGGCUGGCGGCGG	1	0	1	0	1 cited is ma	No	fn-011	mb-01011	ax-1011001	ku-01	ss-100011111100
PID0119	Kang2013-jt	Trree	Tre-milR-12		SRR847118	2497934	0	0	0	NA	GGUGCGGGCUGGCGGCGG	GCCGCGGGCCAAGGACGAC	GGUGCGGGCUGGCGGCGG	0	0	0	0	4 locus not expressed	No	fn-001	mb-01011	ax-1011001	ku-01	ss-000010011100
PID0120	Kang2013-jt	Trree	Tre-milR-13		SRR847118	2497934	0.800662	2	1	0.5	CCAGCAGGACUAUGACGACG	UCCCUCACAACCAGCGCC	CCAGCAGGACUAUGACGACG	1	0	1	0	1 cited is ma	No	fn-001	mb-01010	ax-1001011	ku-01	ss-110110001100
PID0120	Kang2013-jt	Trree	Tre-milR-13		SRR847119	7102386	0.422393	3	2	0.666667	ACCAGCAGGACUAUGACGACG	UCCCUCACAACCAGCGCCG	CCAGCAGGACUAUGACGACG	0	0	1	0	3 cited not expressed	No	fn-001	mb-01010	ax-1001011	ku-01	ss-100110101100
PID0123	Lau2013-sw	Tamar	PM-milR-MC3		SRR922412	7208258	795.615	5735	4097	0.714385	UGAUAUCAAAGUGGGCUAUC	UUUGCUGCUUCGCUGUUGAUAUCUUA	UGAUAUCAAAGUGGGCUAUC	340	0	340	0	1 cited is ma	No	fn-101	mb-01011	ax-1011011	ku-11	ss-111110111000
PID0123	Lau2013-sw	Tamar	PM-milR-MC3		SRR906436	1750171	38.282	67	39	0.58209	UAGAGAUUUGCUGCUUCGCUGU	GUGGGCUAUCUCCCAU	UGAUAUCAAAGUGGGCUAUC	1	0	4	0	2 cited is not ma	No	fn-101	mb-01011	ax-1001011	ku-01	ss-101110101000
PID0125	Lau2013-sw	Tamar	PM-milR-MC5		SRR922412	7208258	27.746	200	184	0.92	UUGCUAUGAUGAAAGCUGAGCA	CUCUGUUUUGUUCAUUGAUU	UUGCUAUGAUGAAAGCUGAGCA	126	0	126	0	1 cited is ma	Yes	fn-111	mb-01111	ax-1001011	ku-01	ss-111111101110
PID0125	Lau2013-sw	Tamar	PM-milR-MC5		SRR906436	1750171	30.8541	54	53	0.981481	UUGCUAUGAUGAAAGCUGAGCA	CUCUGUUUUGUUCAUUGAUU	UUGCUAUGAUGAAAGCUGAGCA	36	0	36	0	1 cited is ma	Yes	fn-111	mb-01011	ax-1001011	ku-11	ss-111111101110
PID0126	Lau2013-sw	Tamar	PM-milR-MC6		SRR906436	1750171	53.1377	93	93	1	UUCCGAUACAAUU	UUCGAGGAGAU	AACGUUUAAAUUUCCGAUACAAUU	6	0	18	0	2 cited is not ma	Yes	fn-111	mb-01011	ax-1011001	ku-01	ss-101011111100
PID0126	Lau2013-sw	Tamar	PM-milR-MC6		SRR922412	7208258	19.5609	141	139	0.985816	UAAAUUUCCGAUACAAUU	UUCGAGGAGAUUGA	AACGUUUAAAUUUCCGAUACAAUU	16	0	24	0	2 cited is not ma	Yes	fn-111	mb-01011	ax-1011001	ku-01	ss-101011111000
PID0128	Lau2013-sw	Tamar	PM-milR-MC8		SRR922412	7208258	9.71108	70	68	0.971429	UUUCUACAGCUGCUGAACGUC	CGUCCAGCAGCUGUGGAAUAC	UUUCUACAGCUGCUGAACGUC	29	0	29	0	1 cited is ma	Yes	fn-111	mb-01011	ax-1011011	ku-01	ss-101111111110
PID0128	Lau2013-sw	Tamar	PM-milR-MC8		SRR906436	1750171	3.99961	7	7	1	CUUCGCGGGC	CCACUCAAGUA	UUUCUACAGCUGCUGAACGUC	0	0	3	0	3 cited not expressed	Yes	fn-111	mb-01011	ax-1011001	ku-01	ss-101011111100
PID0129	Lau2013-sw	Tamar	PM-milR-MC9		SRR906436	1750171	0.571373	1	1	1	UUUUUAGCUAAUGGUGGGAUU	UCUUGCUUUUGGCGUUGGGUG	UUGGCGUUGGGUGUAAUUG	0	0	1	0	3 cited not expressed	Yes	fn-111	mb-01011	ax-1011111	ku-01	ss-110111101110
PID0129	Lau2013-sw	Tamar	PM-milR-MC9		SRR922412	7208258	0.13873	1	1	1	UUGGCGUUGGGUGUAAUUG	AUUGCCUUUUUAGCUAAUG	UUGGCGUUGGGUGUAAUUG	0	0	0	0	3 cited not expressed	No	fn-011	mb-01011	ax-1011001	ku-01	ss-110011111100
PID0130	Lau2013-sw	Tamar	PM-milR-MC10		SRR922412	7208258	2.7746	20	16	0.8	UCGACUGGCUCACCUGAUGCC	UCAAAGGAAUUAUGAGCCUUCCUUG	UCGACUGGCUCACCUGAUGCC	5	0	5	0	1 cited is ma	No	fn-101	mb-01111	ax-1001011	ku-01	ss-101110101100
PID0130	Lau2013-sw	Tamar	PM-milR-MC10		SRR906436	1750171	2.85686	5	0	0	UCGACUGGCUCACCUGAUGCC	UCAAAGGAAUUAUGAGCCUUCCUUG	UCGACUGGCUCACCUGAUGCC	0	0	0	0	3 cited not expressed	No	fn-001	mb-01011	ax-1001011	ku-01	ss-100111001100
PID0131	Lau2013-sw	Tamar	PM-milR-MC11		SRR922412	7208258	1.24857	9	7	0.777778	UCGAUGUACUUCCUUGUGGA	GACGAGGAAUCGAGA	UCGAUGUACUUCCUUGUGGA	7	0	7	0	1 cited is ma	No	fn-101	mb-01011	ax-1001111	ku-01	ss-111110101010
PID0131	Lau2013-sw	Tamar	PM-milR-MC11		SRR906436	1750171	0	0	0	NA	UCGAUGUACUUCCUUGUGGA	UUGAGACGAGGAAUCGAGA	UCGAUGUACUUCCUUGUGGA	0	0	0	0	4 locus not expressed	No	fn-001	mb-00011	ax-1001011	ku-01	ss-000110001000
PID0132	Lau2013-sw	Tamar	PM-milR-MC12		SRR906436	1750171	1.14275	2	2	1	UCGAUCUGCUGUAGACACUC	UAGUACGGUUGGAUUGCCU	UGUUCAUCGAUCUGCUGUAGA	0	0	1	0	3 cited not expressed	Yes	fn-111	mb-01111	ax-1001011	ku-01	ss-100111101100
PID0132	Lau2013-sw	Tamar	PM-milR-MC12		SRR922412	7208258	7.49141	54	37	0.685185	UUCAUCGAUCUGCUGUAGAC	GUACGGUUGGAUUGCCUUG	UGUUCAUCGAUCUGCUGUAGA	0	0	4	0	3 cited not expressed	No	fn-101	mb-01011	ax-1001011	ku-01	ss-101110101100
PID0133	Lau2013-sw	Tamar	PM-milR-MC13		SRR906436	1750171	2.85686	5	5	1	UCUUGGGGUGGUAACGCAACU	CUGACCACGAUACCCCAGAUG	UGCCACUCGAUCAUCUUGGG	0	0	2	0	3 cited not expressed	Yes	fn-111	mb-01111	ax-1001011	ku-01	ss-101111101100
PID0133	Lau2013-sw	Tamar	PM-milR-MC13		SRR922412	7208258	3.46824	25	12	0.48	ACGCAACUUGACAGAACUGACCACG	CAGAUGAUCUGCGAGCCA	UGCCACUCGAUCAUCUUGGG	0	0	1	0	3 cited not expressed	No	fn-001	mb-00110	ax-1011001	ku-01	ss-110010011100
PID0135	Lau2013-sw	Tamar	PM-milR-MC15		SRR922412	7208258	0.693649	5	2	0.4	AUCCGGAUCGAGUUAUUCAC	UAAUGGCAUUUCCGCAGGC	AUCCGGAUCGAGUUAUUCAC	0	0	0	0	3 cited not expressed	No	fn-001	mb-01010	ax-1001011	ku-01	ss-100110001000
PID0135	Lau2013-sw	Tamar	PM-milR-MC15		SRR906436	1750171	0	0	0	NA	AUCCGGAUCGAGUUAUUCAC	UAAUGGCAUUUCCGCAGGC	AUCCGGAUCGAGUUAUUCAC	0	0	0	0	4 locus not expressed	No	fn-001	mb-01010	ax-1001011	ku-01	ss-000110001000
PID0136	Lau2013-sw	Tamar	PM-milR-MC16		SRR922412	7208258	0	0	0	NA	CAUAAGGUCGAGAGUCUCGCA	GGAGACGUGACGCACUUGAGAG	CAUAAGGUCGAGAGUCUCGCA	0	0	0	0	4 locus not expressed	No	fn-001	mb-01011	ax-1001011	ku-01	ss-000110001100
PID0136	Lau2013-sw	Tamar	PM-milR-MC16		SRR906436	1750171	0	0	0	NA	CAUAAGGUCGAGAGUCUCGCA	GGAGACGUGACGCACUUGAGAG	CAUAAGGUCGAGAGUCUCGCA	0	0	0	0	4 locus not expressed	No	fn-001	mb-01011	ax-1001011	ku-01	ss-000110001100
PID0139	Lau2013-sw	Tamar	PM-milR-YC2		SRR906436	1750171	30.8541	54	54	1	CAGCGGUGAUGACAACCAAAGA	UGGGUUGUUUUACAUUUGUUUCG	CAGCGGUGAUGACAACC	8	0	13	0	2 cited is not ma	Yes	fn-111	mb-01011	ax-1001011	ku-01	ss-101111101100
PID0139	Lau2013-sw	Tamar	PM-milR-YC2		SRR922412	7208258	1.10984	8	6	0.75	CAGCGGUGAUGACAACCAAAGAGA	CCUGGGUUGUUUUACAUUUGUUUCG	CAGCGGUGAUGACAACC	0	0	1	0	3 cited not expressed	No	fn-001	mb-01011	ax-1001011	ku-01	ss-100110101100
PID0140	Lau2013-sw	Tamar	PM-milR-YC3		SRR906436	1750171	31.9969	56	55	0.982143	CCGCUUCUAAAAUUGCUAGA	UGGACAGAGAAGCAAGA	CCGCUUCUAAAAUUGCUAGAGC	8	0	10	0	2 cited is not ma	Yes	fn-111	mb-01111	ax-1001011	ku-01	ss-101111101000
PID0140	Lau2013-sw	Tamar	PM-milR-YC3		SRR922412	7208258	12.3469	89	84	0.94382	CCGCUUCUAAAAUU	AGAAGCAAGA	CCGCUUCUAAAAUUGCUAGAGC	0	0	11	0	3 cited not expressed	Yes	fn-111	mb-00011	ax-1011001	ku-01	ss-101011101000
PID0142	Lau2013-sw	Tamar	PM-milR-YC5		SRR906436	1750171	13.7129	24	22	0.916667	UUUCUUGUCUACCUUUCGAGU	UCGAAAGGCAUUCGAGAAAGG	UUUCUUGUCUACCUUUCGAGU	16	0	16	0	1 cited is ma	Yes	fn-111	mb-01011	ax-1011111	ku-01	ss-111111111110
PID0142	Lau2013-sw	Tamar	PM-milR-YC5		SRR922412	7208258	4.16189	30	16	0.533333	UUUCUUGUCUACCUUUCGAGU	UCGAAAGGCAUUCGAGAAAGG	UUUCUUGUCUACCUUUCGAGU	2	0	2	0	1 cited is ma	No	fn-101	mb-01011	ax-1011011	ku-01	ss-101110111100
PID0143	Lau2013-sw	Tamar	PM-milR-YC6		SRR906436	1750171	3.99961	7	7	1	UUCUCGGUGGCGAUGUCCAUU	UGAAUAUCCCCAUCGAGAAC	UUCUCGGUGGCGAUGUCCAUU	7	0	7	0	1 cited is ma	Yes	fn-111	mb-01011	ax-1011111	ku-01	ss-111111111110
PID0143	Lau2013-sw	Tamar	PM-milR-YC6		SRR922412	7208258	0	0	0	NA	UUCUCGGUGGCGAUGUCCAUU	UGAAUAUCCCCAUCGAGAAC	UUCUCGGUGGCGAUGUCCAUU	0	0	0	0	4 locus not expressed	No	fn-001	mb-01011	ax-1011011	ku-01	ss-000110011100
PID0144	Lau2013-sw	Tamar	PM-milR-YC7		SRR906436	1750171	14.2843	25	25	1	CCUUCAGAUCUGGGCUAUGCCC	GUAUCGCACACUCUGAGCAAA	CCUUCAGAUCUGGGCUAUGCCC	12	0	12	0	1 cited is ma	Yes	fn-111	mb-01011	ax-1001011	ku-01	ss-101111101110
PID0144	Lau2013-sw	Tamar	PM-milR-YC7		SRR922412	7208258	0.27746	2	1	0.5	CCUUCAGAUCUGGGCUAUGCCC	GUAUCGCACACUCUGAGCAAA	CCUUCAGAUCUGGGCUAUGCCC	0	0	0	0	3 cited not expressed	No	fn-001	mb-01011	ax-1001011	ku-01	ss-100110101100
PID0145	Chen2014-iq	Fuoxy	fox_milRNA_1	a	SRR1068199	2461411	0	0	0	NA	UGCUAGGGUAGAGAAUUUUUGCAGGC	CUGUAAAAGUUUUUCCUUGGCACC	UGCUAGGGUAGAGAAUUUUUGCAGGC	0	0	0	0	4 locus not expressed	No	fn-001	mb-01011	ax-1011001	ku-01	ss-000010011100
PID0146	Chen2014-iq	Fuoxy	fox_milRNA_1	b	SRR1068199	2461411	0	0	0	NA	UGCUAGGGUAGAGAAUUUUUGCAGGC	CUGUAAAAACUUUUCCUUGGCACC	UGCUAGGGUAGAGAAUUUUUGCAGGC	0	0	0	0	4 locus not expressed	No	fn-001	mb-01011	ax-1011001	ku-01	ss-000010011100
PID0147	Chen2014-iq	Fuoxy	fox_milRNA_1	c	SRR1068199	2461411	0	0	0	NA	UGCUAGGGUAGAGAAUUUUUGCAGGC	CUGUAAAAACUUUUCCUUGGCACC	UGCUAGGGUAGAGAAUUUUUGCAGGC	0	0	0	0	4 locus not expressed	No	fn-001	mb-01011	ax-1011001	ku-01	ss-000010011100
PID0148	Chen2014-iq	Fuoxy	fox_milRNA_1	d	SRR1068199	2461411	0	0	0	NA	UGCUAGGGUAGAGAAUUUUUGCAGGC	CUGUAAAACUUUUUCCUUGGCACC	UGCUAGGGUAGAGAAUUUUUGCAGGC	0	0	0	0	4 locus not expressed	No	fn-001	mb-01011	ax-1011001	ku-01	ss-000010011100
PID0149	Chen2014-iq	Fuoxy	fox_milRNA_1	e	SRR1068199	2461411	0	0	0	NA	UGCUAGGGUAGAGAAUUUUUGCAGGC	CUGUAAAAAUUUUUCCUUGGCACC	UGCUAGGGUAGAGAAUUUUUGCAGGC	0	0	0	0	4 locus not expressed	No	fn-001	mb-01011	ax-1011001	ku-01	ss-000010011100
PID0150	Chen2014-iq	Fuoxy	fox_milRNA_1	f	SRR1068199	2461411	0	0	0	NA	UGCUAGGGUAGAGAAUUUUUGCAGGC	CUGUAAAACUUUUUCCUUGGCACC	UGCUAGGGUAGAGAAUUUUUGCAGGC	0	0	0	0	4 locus not expressed	No	fn-001	mb-01011	ax-1011001	ku-01	ss-000010011100
PID0151	Chen2014-iq	Fuoxy	fox_milRNA_1	g	SRR1068199	2461411	0	0	0	NA	UGCUAGGGUAGAGAAUUUUUGCAGGC	CUGUAAAACUUUUUCCUUGGCACC	UGCUAGGGUAGAGAAUUUUUGCAGGC	0	0	0	0	4 locus not expressed	No	fn-001	mb-01011	ax-1011001	ku-01	ss-000010011100
PID0152	Chen2014-iq	Fuoxy	fox_milRNA_2	a	SRR1068199	2461411	3.65644	9	2	0.222222	GACAACGUGGCCGAGUGGUUAAGGC	CGGCCAUGCUU	GACAACGUGGCCGAGUGGUUAAGGC	0	0	0	0	3 cited not expressed	No	fn-001	mb-00010	ax-1000001	ku-01	ss-100000001000
PID0153	Chen2014-iq	Fuoxy	fox_milRNA_2	b	SRR1068199	2461411	1.21881	3	3	1	GACAACGUGGCCGAGUGGUUAAGGC	GUUCGCACGCGUAGGUUCGAAUCCU	GACAACGUGGCCGAGUGGUUAAGGC	0	0	0	0	3 cited not expressed	No	fn-011	mb-01011	ax-1001001	ku-01	ss-100011101100
PID0154	Chen2014-iq	Fuoxy	fox_milRNA_2	c	SRR1068199	2461411	31.2829	77	77	1	UGUUCGCACGCGUAGGUUCGAAUC	AUCCUGCCGUUGUCGAUAUUUGUUUU	GGCAUUGUGUUCGCACGCGUAGGUUCG	0	0	3	0	3 cited not expressed	Yes	fn-111	mb-00010	ax-1001011	ku-01	ss-101111101100
PID0155	Chen2014-iq	Fuoxy	fox_milRNA_2	d	SRR1068199	2461411	11.7819	29	29	1	CUUCGGAGACAUC	UGGCCGAGUGGUUAAGGCGAUGCCCU	GGCAUUGUGUUCGCACGCGUAGGUUCG	0	0	1	0	3 cited not expressed	No	fn-011	mb-00010	ax-1001001	ku-01	ss-100011101100
PID0156	Chen2014-iq	Fuoxy	fox_milRNA_2	e	SRR1068199	2461411	1.62508	4	4	1	GGCAUUGUGUUCGCACGCGUAGGUUCG	UGGCCGAGUGGUUAAGGCGAUGCCCU	GGCAUUGUGUUCGCACGCGUAGGUUCG	0	0	0	0	3 cited not expressed	No	fn-011	mb-01011	ax-1001001	ku-01	ss-100011101100
PID0157	Chen2014-iq	Fuoxy	fox_milRNA_3	a	SRR1068199	2461411	38.1895	94	94	1	CCGGUGUGGUGUAUCGGUUUAUCAUUCCGC	UGAAUAUAUAUUGAAGCUACACGGAU	CCGGUGUGGUGUAUCGGUUUAUCAUUCCGC	6	0	6	0	1 cited is ma	Yes	fn-111	mb-01011	ax-1011001	ku-01	ss-101011111000
PID0158	Chen2014-iq	Fuoxy	fox_milRNA_3	b	SRR1068199	2461411	25.1888	62	62	1	CGGCGAGCGGGGUUCGACUCCCCGCACCGGA	GGGGUUCGACUCCCCGCACCGGAG	CCGGUGUGGUGUAUCGGUUAUCAUUCCGC	0	0	2	0	3 cited not expressed	Yes	fn-111	mb-00011	ax-1001001	ku-01	ss-101011101000
PID0159	Chen2014-iq	Fuoxy	fox_milRNA_4		SRR1068199	2461411	10953.5	26961	26960	0.999963	UGGAUGAAUCAAGCGUGGUAUGAU	CGUAUCAUGCGUGAUUCAUCCAUC	UGGAUGAAUCAAGCGUGGUAUGA	324	0	405	0	2 cited is not ma	Yes	fn-111	mb-01011	ax-1011011	ku-11	ss-101111111100
PID0167	Chen2015-xw	Fugra	Fg-milRNA-4		SRR1427175	3139297	22.6165	71	23	0.323944	UGGAGAAAAUUGAGAAGGCUCG	AGCCUUCUCAAUUUUCUCCAUG	UGGAGAAAAUUGAGAAGGCUCGA	4	0	5	0	2 cited is not ma	No	fn-101	mb-01011	ax-1011011	ku-00	ss-111110011100
PID0168	Chen2015-xw	Fugra	Fg-milRNA-5		SRR1427175	3139297	155.13	487	487	1	UAGGAAAGGCAGUUAACUAGGA	CUGGUUAGCUCACUUUCUUACA	UAGGAAAGGCAGUUAACUAGGA	306	0	306	0	1 cited is ma	Yes	fn-111	mb-01011	ax-1011011	ku-11	ss-111111111110
PID0169	Chen2015-xw	Fugra	Fg-milRNA-6		SRR1427175	3139297	26.7576	84	84	1	GAAAGUCAGGAAAUGUAUAUAUA	UUAUAUAUUUUUUGACUGUCAA	UUAUAUAUUUUUUGACUGUCA	15	0	31	8	2 cited is not ma	Yes	fn-111	mb-01111	ax-1111111	ku-01	ss-111111111111
PID0170	Chen2015-xw	Fugra	Fg-milRNA-7		SRR1427175	3139297	230.306	723	50	0.0691563	UAAACUGAGAAGAUUAGGGCU	CCUUAGCCUUUUCAUUUUACU	UAAACUGAGAAGAUUAGGGCU	20	0	20	0	1 cited is ma	No	fn-101	mb-01011	ax-1011011	ku-01	ss-101111011100
PID0171	Chen2015-xw	Fugra	Fg-milRNA-8		SRR1427175	3139297	4.14105	13	13	1	GACAAGGAGUGGUCGAGCGGUA	CCGUUCGACCACUCCUUGUCUU	GACAAGGAGUGGUCGAGCGGUA	5	0	5	0	1 cited is ma	Yes	fn-111	mb-01011	ax-1011111	ku-01	ss-111111111110
PID0172	Chen2015-xw	Fugra	Fg-milRNA-9		SRR1427175	3139297	2.86688	9	9	1	AAGAAAAUGGGAGCGAGCACA	GUUCGCUUCUUAUUUCUUUU	AAGAAAAUGGGAGCGAGCACA	3	0	3	0	1 cited is ma	Yes	fn-111	mb-01011	ax-1011011	ku-01	ss-111111111110
PID0173	Chen2015-xw	Fugra	Fg-milRNA-10		SRR1427175	3139297	5.09668	16	16	1	GGAGGAGGAGAAGGAGGAGUC	UUCCUACCUAUUUCUUUUUUGG	GGAGGAGGAGAAGGAGGAGUC	5	0	5	0	1 cited is ma	Yes	fn-111	mb-01011	ax-1011011	ku-01	ss-101111111100
PID0174	Chen2015-xw	Fugra	Fg-milRNA-11		SRR1427175	3139297	2.86688	9	9	1	AGGAUAUUAGUGGAUGGGUCGAG	CGACCUAUGAAUUAAUAUCCUCA	AGGAUAUUAGUGGAUGGGUCGAG	4	0	4	0	1 cited is ma	Yes	fn-111	mb-01011	ax-1011011	ku-01	ss-101111111110
PID0175	Chen2015-xw	Fugra	Fg-milRNA-12		SRR1427175	3139297	46.8258	147	147	1	GGCAGCAUUGUUGACAGGGCCUU	CGGACUCUCUCGGCUUCUCGGUCCA	GGCAGCAUUGUUGACAGGGCCUU	14	0	14	0	1 cited is ma	Yes	fn-111	mb-01011	ax-1001011	ku-01	ss-101111101100
PID0177	Chen2015-xw	Fugra	Fg-milRNA-14		SRR1427175	3139297	10.5119	33	33	1	GAAACUGGAUGGCUUCGUAGA	UACGAAAGCCGUUGGGUUUCUU	GAAACUGGAUGGCUUCGUAGA	8	0	8	0	1 cited is ma	Yes	fn-111	mb-01111	ax-1011011	ku-01	ss-111111111100
PID0178	Chen2015-xw	Fugra	Fg-milRNA-15		SRR1427175	3139297	9.55628	30	30	1	UUGGUUGGGAACGUUGGUU	CCAGCAAUACCAAGACGCC	UUGGUUGGGAACGUUGGUUA	1	0	3	0	2 cited is not ma	Yes	fn-111	mb-01010	ax-1001001	ku-01	ss-101011101000
PID0179	Chen2015-xw	Fugra	Fg-milRNA-16		SRR1427175	3139297	0.637085	2	2	1	CGGGACGGUUUAACAUUCCC	GUCUGUGUAACCUCCCGGU	CCGGGACGGUUUAACAUUCCCCUU	0	0	2	0	3 cited not expressed	Yes	fn-111	mb-01011	ax-1011111	ku-01	ss-111111111110
PID0180	Chen2015-xw	Fugra	Fg-milRNA-17		SRR1427175	3139297	286.051	898	898	1	GACAACGUGGCCGAGUGGUUA	AUCUGUAGUCGCUUUCUU	GACAACGUGGCCGAGUGGUU	267	0	268	0	2 cited is not ma	Yes	fn-111	mb-01011	ax-1001011	ku-11	ss-101111101110
PID0181	Chen2015-xw	Fugra	Fg-milRNA-18		SRR1427175	3139297	6.37085	20	20	1	GAAGUGACAAGAAGAAGAACCGCC	CCGAUUCUUUGCCUGCGUCGCUAUUUCCGCCG	AGUGACAAGAAGAAGAACCGCC	0	0	3	0	3 cited not expressed	Yes	fn-111	mb-00011	ax-1001011	ku-01	ss-101111101000
PID0182	Chen2015-xw	Fugra	Fg-milRNA-19		SRR1427175	3139297	47.1443	148	148	1	GAAGGAGGAUAAGGAAGACGACG	CUGCUGCUGCCCAGCUCGC	GAGGAAGAGGAGGAGGAGGAGGA	1	0	3	0	2 cited is not ma	Yes	fn-111	mb-00010	ax-1001011	ku-01	ss-101111101000
PID0183	Chen2015-xw	Fugra	Fg-milRNA-20		SRR1427175	3139297	3.18543	10	10	1	GGAGUCUCGUGGAUUUGGCUUU	AUGCCAGAUCAUGCGAGACCCCCA	UGCCAGAUCAUGCGAGACCCCCA	0	0	3	0	3 cited not expressed	Yes	fn-111	mb-01011	ax-1011011	ku-01	ss-111111111100
PID0185	Chen2015-xw	Fugra	Fg-milRNA-22		SRR1427175	3139297	6.37085	20	19	0.95	AGCAAGGAGUGGUGUAGUGGGAACCCG	UCACCCCACUGCACCCUCCUUGUUUU	AGCAAGGAGUGGUGUAGUGGGA	1	0	4	0	2 cited is not ma	Yes	fn-111	mb-01011	ax-1001001	ku-01	ss-101011101100
PID0186	Chen2015-xw	Fugra	Fg-milRNA-23		SRR1427175	3139297	208.327	654	653	0.998471	UCUUCGGAGGCGUCUGUU	CGGCGCAGUGGCAGAGU	GGCGCAGUGGCAGAGUGGUCUA	86	0	166	0	2 cited is not ma	Yes	fn-111	mb-01111	ax-1011001	ku-11	ss-101011111100
PID0187	Chen2015-xw	Fugra	Fg-milRNA-24		SRR1427175	3139297	2.54834	8	8	1	AAAGCGAUUCAAUUCAUCUUUU	UGGAUGGAUGAUUGCUUGUUUUU	AAAGCGAUUCAAUUCAUCUUUU	2	0	2	0	1 cited is ma	Yes	fn-111	mb-00011	ax-1001111	ku-01	ss-111111101110
PID0188	Chen2015-xw	Fugra	Fg-milRNA-25		SRR1427175	3139297	0.318543	1	1	1	GAUGAAGACUGAACCGUCGGGGG	CCGGAUGGUAAUGCCUUCGUCAU	GAUGAAGACUGAACCGUCGGGG	0	0	1	0	3 cited not expressed	No	fn-011	mb-01011	ax-1001111	ku-01	ss-110111101110
PID0189	Chen2015-xw	Fugra	Fg-milRNA-26		SRR1427175	3139297	329.692	1035	1035	1	GGCAACGUGGCGGAGUGGUU	CUUCCCACCGUCAUGUCGUGUC	GGCAACGUGGCGGAGUGGUU	263	0	263	0	1 cited is ma	Yes	fn-111	mb-01011	ax-1001011	ku-11	ss-101111101110
PID0190	Chen2015-xw	Fugra	Fg-milRNA-27		SRR1427175	3139297	2.54834	8	8	1	UGGGAUGAAUGGGCGGACAAU	UGUCCGACCAAGCUCGUCCCCGA	UUGGGAUGAAUGGGCGGACAAUA	0	0	1	0	3 cited not expressed	No	fn-011	mb-01011	ax-1011011	ku-01	ss-100111101100
PID0191	Chen2015-xw	Fugra	Fg-milRNA-28		SRR1427175	3139297	1.27417	4	4	1	AUGGGUACGGGCGGGUUGCGGA	CAAGCAUCCUGCCAGCUCCAGCC	AUGGGUACGGGCGGGUUGCGGAA	0	0	1	0	3 cited not expressed	Yes	fn-111	mb-01011	ax-1001111	ku-01	ss-110111101110
PID0192	Chen2015-xw	Fugra	Fg-milRNA-29		SRR1427175	3139297	0.637085	2	2	1	AGGAGGCAGUAAUAAGACUU	AGUUGGUUAGGCGCUCUUGU	AGGAGGCAGUAAUAAGACUUG	0	0	1	0	3 cited not expressed	Yes	fn-111	mb-01011	ax-1011111	ku-01	ss-110111111110
PID0193	Chen2015-xw	Fugra	Fg-milRNA-30		SRR1427175	3139297	3.18543	10	10	1	ACGCGACUGGGAUAAGACGAC	CGAUUUUAUCCCGUCGUUCUC	CGCGACUGGGAUAAGACGACAA	0	0	2	0	3 cited not expressed	Yes	fn-111	mb-01011	ax-1011011	ku-01	ss-101111101100
PID0195	Chen2015-xw	Fugra	Fg-milRNA-32		SRR1427175	3139297	2.2298	7	7	1	GAGGACACUGCAUCACGACUCU	AGCCGUUGGUGCCAGCCCCUCAG	UGAGGACACUGCAUCACGACUCU	0	0	4	0	3 cited not expressed	Yes	fn-111	mb-01011	ax-1001011	ku-01	ss-111111101110
PID0196	Chen2015-xw	Fugra	Fg-milRNA-33		SRR1427175	3139297	1.91126	6	6	1	GAUAAGGAGUGGUCGAGCGGGAU	CCUGUUCGACCGCUCCUUAUCUU	GAUAAGGAGUGGUCGAGCGGGAU	2	0	2	0	1 cited is ma	Yes	fn-111	mb-01011	ax-1011011	ku-01	ss-111111111100
PID0197	Chen2015-xw	Fugra	Fg-milRNA-34		SRR1427175	3139297	516.995	1623	1619	0.997535	GCGGGUUUAGCUCAGUUGGGAGA	UUCUUUUGCUGGUAGACCUUCUU	GCGGGUUUAGCUCAGUUGGGAGA	266	0	266	0	1 cited is ma	Yes	fn-111	mb-01011	ax-1011011	ku-11	ss-101111111100
PID0199	Chen2015-xw	Fugra	Fg-milRNA-36		SRR1427175	3139297	1.59271	5	5	1	GUGGGAUCUGAUGCACGAGAUGGUG	CCUGCUCUGCAACAUGACCCACCG	GUGGGAUCUGAUGCACGAGAUGG	0	0	1	0	3 cited not expressed	No	fn-011	mb-01011	ax-1001001	ku-01	ss-100011101100
PID0200	Chen2015-xw	Fugra	Fg-milRNA-37		SRR1427175	3139297	0.318543	1	1	1	GUGUUGACGAGACUGAGCGUAGGAAACA	CCUACGUAGUCAGCCGUCUA	GACGAGACUGAGCGUAGGAA	0	0	1	0	3 cited not expressed	No	fn-011	mb-00011	ax-1011101	ku-01	ss-100011111110
PID0201	Chen2015-xw	Fugra	Fg-milRNA-38		SRR1427175	3139297	0.955628	3	3	1	ACGGAUCCCCUUGAGCGUAGG	GCGUAGGGCAGUUGAGAGGUG	CCUCUCGAUGACUCUGCGCAA	0	0	2	0	3 cited not expressed	Yes	fn-111	mb-00011	ax-1011111	ku-01	ss-111111111110
PID0202	Chen2015-xw	Fugra	Fg-milRNA-39		SRR1427175	3139297	0	0	0	NA	GGGGAUGGGUAUGGGUCGGGGC	CCCGGUCCAGAACCCGCUAACUUUU	GGGGAUGGGUAUGGGUCGGGGC	0	0	0	0	4 locus not expressed	No	fn-001	mb-01011	ax-1011011	ku-01	ss-000110011100
PID0203	Chen2015-xw	Fugra	Fg-milRNA-40		SRR1427175	3139297	3.18543	10	10	1	UCUGGAAGACUGAGUGGAU	GGUCGGUUUCCACGAUG	UCUGGAAGACUGAGUGGAUG	1	0	2	0	2 cited is not ma	Yes	fn-111	mb-01011	ax-1011001	ku-01	ss-101011111100
PID0204	Chen2015-xw	Fugra	Fg-milRNA-41		SRR1427175	3139297	1.91126	6	6	1	CUGGAUCAUUGUAGACCAGGCUG	ACCUGAUCGCAUUGUCCAGAU	CUGGAUCAUUGUAGACCAGGCU	1	0	2	0	2 cited is not ma	Yes	fn-111	mb-01011	ax-1011011	ku-01	ss-101111101100
PID0206	Chen2015-xw	Fugra	Fg-milRNA-43		SRR1427175	3139297	1.59271	5	5	1	UCUGCGGCGAUGAAUAGACACU	UGUCUGUAGUCGCUAAGAGC	UCUGCGGCGAUGAAUAGACACU	1	0	1	0	1 cited is ma	No	fn-011	mb-01011	ax-1011011	ku-01	ss-100111111100
PID0207	Chen2015-xw	Fugra	Fg-milRNA-44		SRR1427175	3139297	1.59271	5	5	1	GCUGUCGAGCGUGUAUGGGGUG	CCCGAUUACACUCGUGAGGGCGG	GCUGUCGAGCGUGUAUGGGGUG	1	0	1	0	1 cited is ma	Yes	fn-111	mb-01011	ax-1001011	ku-01	ss-100111101100
PID0209	Chen2015-xw	Fugra	Fg-milRNA-46		SRR1427175	3139297	0.637085	2	2	1	GACGUCUCGGAGCAGCAGAUUA	CGCUGUGGCUCUUGAGGCCCU	AGGACGUCUCGGAGCAGCAGA	0	0	1	0	3 cited not expressed	No	fn-011	mb-01011	ax-1001011	ku-01	ss-110111101100
PID0210	Chen2015-xw	Fugra	Fg-milRNA-47		SRR1427175	3139297	49.6927	156	156	1	AAGACUCAUAGAAAUUAGGGCA	CCCUAAUUUCUAUGACUCUCGA	AAGACUCAUAGAAAUUAGGGCA	129	0	129	0	1 cited is ma	Yes	fn-111	mb-01011	ax-1011111	ku-11	ss-111111111110
PID0212	Chen2015-xw	Fugra	Fg-milRNA-49		SRR1427175	3139297	863.569	2711	2709	0.999262	GGCAACGUGACGGAGUGGUUA	AUUAUUCUUCGAGUUGUCCUU	GGCAACGUGACGGAGUGGUUA	654	0	654	0	1 cited is ma	Yes	fn-111	mb-01011	ax-1010011	ku-11	ss-101101111100
PID0213	Dahlmann2015-ew	Pechr	milR-1		SRR1705826	25524365	19.8242	506	435	0.859684	UUGGUACGAUCGAUUGGAGA	CCCAGUCGGUGGUAUCAUGUC	UUGGUACGAUCGAUUGGAGA	272	4	272	4	1 cited is ma	Yes	fn-111	mb-01111	ax-1111011	ku-01	ss-101111111111
PID0213	Dahlmann2015-ew	Pechr	milR-1		SRR1705825	23637125	17.6417	417	364	0.872902	UUGGUACGAUCGAUUGGAGA	CCCAGUCGGUGGUAUCAUGUC	UUGGUACGAUCGAUUGGAGA	183	1	183	1	1 cited is ma	Yes	fn-111	mb-01111	ax-1111011	ku-01	ss-101111111101
PID0214	Dahlmann2015-ew	Pechr	milR-2		SRR1705825	23637125	13.7919	326	319	0.978528	UGAGAACGCUGAUAUAUAUAU	GUAUAAUUUUGUUGAAGUCUUACU	UGAGAACGCUGAUAUAUAUAU	245	0	245	0	1 cited is ma	Yes	fn-111	mb-01111	ax-1001111	ku-01	ss-111111101110
PID0214	Dahlmann2015-ew	Pechr	milR-2		SRR1705826	25524365	15.1228	386	379	0.981865	UGAGAACGCUGAUAUAUAUAU	GUAUAAUUUUGUUGAAGUCUUACU	UGAGAACGCUGAUAUAUAUAU	320	0	320	0	1 cited is ma	Yes	fn-111	mb-01111	ax-1001111	ku-01	ss-111111101110
PID0215	Dahlmann2015-ew	Pechr	milR-3		SRR1705825	23637125	17.261	408	351	0.860294	UAGAAGAUCAUGCAGCAUGUA	UAUGCGGGCCUUCUUGUU	UAGAAGAUCAUGCAGCAUGUA	270	0	270	0	1 cited is ma	Yes	fn-111	mb-01011	ax-1001011	ku-01	ss-111111101110
PID0215	Dahlmann2015-ew	Pechr	milR-3		SRR1705826	25524365	15.7888	403	347	0.861042	UAGAAGAUCAUGCAGCAUGUA	UAUGCGGGCCUUCUUGUU	UAGAAGAUCAUGCAGCAUGUA	262	0	262	0	1 cited is ma	Yes	fn-111	mb-01011	ax-1001011	ku-01	ss-111111101110
PID0216	Dahlmann2015-ew	Pechr	milR-4		SRR1705825	23637125	40.3179	953	31	0.0325289	UGCGACACAAGAACAAUCGGACGAU	UCUACGACCAUUCUUUCGCUAU	UGCGACACAAGAACAAUCGGACGAU	11	0	11	0	1 cited is ma	No	fn-001	mb-01010	ax-1001001	ku-01	ss-101011001100
PID0216	Dahlmann2015-ew	Pechr	milR-4		SRR1705826	25524365	42.5084	1085	24	0.0221198	UGCGACACAAGAACAAUCGGACGAU	UCUACGACCAUUCUUUCGCUAU	UGCGACACAAGAACAAUCGGACGAU	10	0	10	0	1 cited is ma	No	fn-001	mb-01010	ax-1001001	ku-01	ss-101011001100
PID0217	Dahlmann2015-ew	Pechr	milR-5		SRR1705825	23637125	8.84202	209	195	0.933014	UGACAUAGGAACGACGAGAC	UUUGGUUGAUCAAUGGCAAU	UGACAUAGGAACGACGAGA	22	0	25	0	2 cited is not ma	Yes	fn-111	mb-01011	ax-1011011	ku-01	ss-111111111100
PID0217	Dahlmann2015-ew	Pechr	milR-5		SRR1705826	25524365	9.99045	255	234	0.917647	UGACAUAGGAACGACGAGA	UUGGUUGAUCAAUGGCAAU	UGACAUAGGAACGACGAGA	41	0	41	0	1 cited is ma	Yes	fn-111	mb-01111	ax-1011001	ku-01	ss-111011111100
PID0218	Dahlmann2015-ew	Pechr	milR-6		SRR1705826	25524365	0.0391783	1	0	0	UCGGGCCCGUAGCUGUGAUGC	AUUUCAGCAACUCGGUUGCCUGGUG	UCGGGCCCGUAGCUGUGAUGC	0	0	0	0	3 cited not expressed	No	fn-001	mb-01011	ax-1011011	ku-01	ss-110111001100
PID0218	Dahlmann2015-ew	Pechr	milR-6		SRR1705825	23637125	0	0	0	NA	UCGGGCCCGUAGCUGUGAUGC	AUUUCAGCAACUCGGUUGCCUGGUG	UCGGGCCCGUAGCUGUGAUGC	0	0	0	0	4 locus not expressed	No	fn-001	mb-01011	ax-1011011	ku-01	ss-000110001100
PID0219	Dahlmann2015-ew	Pechr	milR-7	a	SRR1705825	23637125	0	0	0	NA	UAGGUUCAGGAAGUUCUCUCC	CAGGAUCUGUGUCUUCAACCGUC	UAGGUUCAGGAAGUUCUCUCC	0	0	0	0	4 locus not expressed	No	fn-001	mb-01010	ax-1001011	ku-01	ss-000110001000
PID0219	Dahlmann2015-ew	Pechr	milR-7	a	SRR1705826	25524365	0	0	0	NA	UAGGUUCAGGAAGUUCUCUCC	CAGGAUCUGUGUCUUCAACCGUC	UAGGUUCAGGAAGUUCUCUCC	0	0	0	0	4 locus not expressed	No	fn-001	mb-01010	ax-1001011	ku-01	ss-000110001000
PID0220	Dahlmann2015-ew	Pechr	milR-7	b	SRR1705825	23637125	0	0	0	NA	UAGGUUCAGGAAGUUCUCUCC	CAGGAUCUGUGUCUUCAACCGUC	UAGGUUCAGGAAGUUCUCUCC	0	0	0	0	4 locus not expressed	No	fn-001	mb-01010	ax-1001011	ku-01	ss-000110001000
PID0220	Dahlmann2015-ew	Pechr	milR-7	b	SRR1705826	25524365	0	0	0	NA	UAGGUUCAGGAAGUUCUCUCC	CAGGAUCUGUGUCUUCAACCGUC	UAGGUUCAGGAAGUUCUCUCC	0	0	0	0	4 locus not expressed	No	fn-001	mb-01010	ax-1001011	ku-01	ss-000110001000
PID0221	Dahlmann2015-ew	Pechr	milR-7	c	SRR1705825	23637125	0.676901	16	7	0.4375	UAGGUUCAGGAAGUUCUCUCC	CAGGAUCUGUGUCUUCAACCGUC	UAGGUUCAGGAAGUUCUCUCC	2	0	2	0	1 cited is ma	No	fn-001	mb-01110	ax-1001011	ku-01	ss-111110001000
PID0221	Dahlmann2015-ew	Pechr	milR-7	c	SRR1705826	25524365	0.117535	3	1	0.333333	CGAGCGUUCCACAAUCGGAAAGC	CAGGAUCUGUGUCUUCAACCGUC	UAGGUUCAGGAAGUUCUCUCC	0	0	1	0	3 cited not expressed	No	fn-001	mb-00010	ax-1001011	ku-01	ss-100110001000
PID0222	Dahlmann2015-ew	Pechr	milR-8		SRR1705825	23637125	0.423063	10	9	0.9	UGGCUACGGAUAUGACUCUC	GGGAGUGUCCGCUGGCGAGCC	UGGCUACGGAUAUGACUCUC	5	0	5	0	1 cited is ma	No	fn-011	mb-01111	ax-1011011	ku-01	ss-111111111110
PID0222	Dahlmann2015-ew	Pechr	milR-8		SRR1705826	25524365	0.470139	12	10	0.833333	UGGCUACGGAUAUGACUCUC	GGGAGUGUCCGCUGGCGAGCC	UGGCUACGGAUAUGACUCUC	7	0	7	0	1 cited is ma	No	fn-011	mb-01111	ax-1011111	ku-01	ss-101111111110
PID0223	Dahlmann2015-ew	Pechr	milR-9		SRR1705825	23637125	6.26134	148	143	0.966216	GGCCCCAGAGAUCGUUGGUCUAA	UGACCGACCGAAAUCUGACCAU	GGCCCCAGAGAUCGUUGGUCUAA	78	0	78	0	1 cited is ma	Yes	fn-111	mb-01011	ax-1011011	ku-01	ss-111111101110
PID0223	Dahlmann2015-ew	Pechr	milR-9		SRR1705826	25524365	5.79838	148	138	0.932432	GGCCCCAGAGAUCGUUGGUCUAA	UGACCGACCGAAAUCUGACCAU	GGCCCCAGAGAUCGUUGGUCUAA	84	0	84	0	1 cited is ma	Yes	fn-111	mb-01011	ax-1011011	ku-01	ss-111111101110
PID0224	Dahlmann2015-ew	Pechr	milR-10		SRR1705825	23637125	11.2112	265	258	0.973585	UAGCCAUCUCGUCGAGGUAGA	UACUAGAGGUUGUUGCUAGC	UAGCCAUCUCGUCGAGGUAGA	223	0	223	0	1 cited is ma	Yes	fn-111	mb-01011	ax-1001111	ku-01	ss-111111101110
PID0224	Dahlmann2015-ew	Pechr	milR-10		SRR1705826	25524365	11.4792	293	279	0.952218	UAGCCAUCUCGUCGAGGUAGA	UACUAGAGGUUGUUGCUAGC	UAGCCAUCUCGUCGAGGUAGA	234	0	234	0	1 cited is ma	Yes	fn-111	mb-01011	ax-1001111	ku-01	ss-111111101110
PID0225	Dahlmann2015-ew	Pechr	milR-11		SRR1705825	23637125	0	0	0	NA	UAUGUCUGCUCUGGUCCAUGAC	CACGGCCAUCGAGCCUCUGACAGGA	UAUGUCUGCUCUGGUCCAUGAC	0	0	0	0	4 locus not expressed	No	fn-001	mb-01011	ax-1001011	ku-01	ss-000110001000
PID0225	Dahlmann2015-ew	Pechr	milR-11		SRR1705826	25524365	0	0	0	NA	UAUGUCUGCUCUGGUCCAUGAC	CACGGCCAUCGAGCCUCUGACAGGA	UAUGUCUGCUCUGGUCCAUGAC	0	0	0	0	4 locus not expressed	No	fn-001	mb-01011	ax-1001011	ku-01	ss-000110001000
PID0226	Dahlmann2015-ew	Pechr	milR-12		SRR1705826	25524365	0.274248	7	4	0.571429	UGAGACGUCCAGGCUGACG	CUGCCUUCCGUCUUCUC	UCCAGGCUGACGGUGGCGCA	0	0	2	0	3 cited not expressed	No	fn-001	mb-01111	ax-1011001	ku-01	ss-101010111100
PID0226	Dahlmann2015-ew	Pechr	milR-12		SRR1705825	23637125	0.296144	7	4	0.571429	UGAGACGUCCAGGCUGA	UGCCUUCCGUCUUCUC	UCCAGGCUGACGGUGGCGCA	0	0	2	0	3 cited not expressed	No	fn-001	mb-01011	ax-1011001	ku-01	ss-101010111100
PID0227	Dahlmann2015-ew	Pechr	milR-13		SRR1705825	23637125	11.1266	263	205	0.779468	UAGGACUUGAUCGCGUGAGA	UCGCCGCGUUUCUUCACUAAG	UAGGACUUGAUCGCGUGAGAC	29	0	70	0	2 cited is not ma	No	fn-101	mb-01111	ax-1011011	ku-01	ss-111110101100
PID0227	Dahlmann2015-ew	Pechr	milR-13		SRR1705826	25524365	10.4214	266	201	0.755639	UAGGACUUGAUCGCGUGAGA	UCGCCGCGUUUCUUCACUAAG	UAGGACUUGAUCGCGUGAGAC	15	0	71	0	2 cited is not ma	No	fn-101	mb-01111	ax-1011011	ku-01	ss-101110101100
PID0230	Dahlmann2015-ew	Pechr	milR-16		SRR1705825	23637125	8.20743	194	159	0.819588	UGGGCGGGCGAGAUUGAAC	UCCAUCGGACUGGUGUUGA	UGGGCGGGCGAGAUUGAAC	112	0	112	0	1 cited is ma	Yes	fn-111	mb-01110	ax-1001001	ku-01	ss-101011101110
PID0230	Dahlmann2015-ew	Pechr	milR-16		SRR1705826	25524365	9.48114	242	184	0.760331	UGGGCGGGCGAGAUUGAAC	UCCAUCGGACUGGUGUUGA	UGGGCGGGCGAGAUUGAAC	131	0	131	0	1 cited is ma	No	fn-101	mb-01110	ax-1001001	ku-01	ss-101010101110
PID0231	Dahlmann2015-ew	Pechr	milR-17		SRR1705826	25524365	2.7033	69	44	0.637681	UCCAUCGUGGCUGUGCACUU	CUGUCCAGCACCAUGUAGA	UCCAUCGUGGCUGUGCACUU	25	0	25	0	1 cited is ma	No	fn-101	mb-01111	ax-1001011	ku-01	ss-101110101100
PID0231	Dahlmann2015-ew	Pechr	milR-17		SRR1705825	23637125	6.51517	154	67	0.435065	UCCAUCGUGGCUGUGCACUU	CUGUCCAGCACCAUGUAGA	UCCAUCGUGGCUGUGCACUU	42	0	42	0	1 cited is ma	No	fn-101	mb-01111	ax-1001011	ku-01	ss-101110001100
PID0233	Dahlmann2015-ew	Pechr	milR-19		SRR1705825	23637125	5.28829	125	119	0.952	CGGACGAGAAUGCCGAGGCUCUGUU		CGGACGAGAAUGCCGAGGCUCUGUU	34	0	34	0	1 cited is ma	Yes	fn-111	mb-00010	ax-0001000	ku-01	ss-101011101000
PID0233	Dahlmann2015-ew	Pechr	milR-19		SRR1705826	25524365	5.09317	130	125	0.961538	CGGACGAGAAUGCCGAGGCUCUGUU		CGGACGAGAAUGCCGAGGCUCUGUU	38	0	38	0	1 cited is ma	Yes	fn-111	mb-00010	ax-0001000	ku-01	ss-101011101000
PID0234	Dahlmann2015-ew	Pechr	milR-20		SRR1705826	25524365	2.66412	68	68	1	UCCUACGUUACUCCAAAGGAU	CCUCUGGAGCAACGUAGGACA	UCCUACGUUACUCCAAAGGAU	20	0	20	0	1 cited is ma	Yes	fn-111	mb-01011	ax-1011011	ku-01	ss-111111111110
PID0234	Dahlmann2015-ew	Pechr	milR-20		SRR1705825	23637125	2.19993	52	51	0.980769	UCCUACGUUACUCCAAAGGAU	CCUCUGGAGCAACGUAGGACA	UCCUACGUUACUCCAAAGGAU	15	0	15	0	1 cited is ma	Yes	fn-111	mb-01011	ax-1011011	ku-01	ss-111111111100
PID0235	Dahlmann2015-ew	Pechr	milR-21		SRR1705825	23637125	26.3991	624	624	1	UCUAGUCUGCCUCU	AGGCAGAUUAGACC	UCCCCCUCGAGAAGAUCUAGUCUGCCUCU	13	0	208	0	2 cited is not ma	Yes	fn-111	mb-01111	ax-1011001	ku-01	ss-101011111100
PID0235	Dahlmann2015-ew	Pechr	milR-21		SRR1705826	25524365	28.5609	729	729	1	UCUAGUCUGCCUCU	AGGCAGAUUAGACC	UCCCCCUCGAGAAGAUCUAGUCUGCCUCU	14	0	267	0	2 cited is not ma	Yes	fn-111	mb-01011	ax-1011001	ku-01	ss-101011111100
PID0236	Dahlmann2015-ew	Pechr	milR-22		SRR1705825	23637125	2.0307	48	38	0.791667	UUUGGAUGAAAUUCGAAUGAA	CUUUGAUCAUCUUCAU	UUUGGAUGAAAUUCGAAUGAA	25	0	25	0	1 cited is ma	No	fn-101	mb-01111	ax-1011011	ku-01	ss-111110101110
PID0236	Dahlmann2015-ew	Pechr	milR-22		SRR1705826	25524365	2.54659	65	46	0.707692	UUUGGAUGAAAUUCGAAUGAA	CUUUGAUCAUCUUCAU	UUUGGAUGAAAUUCGAAUGAA	31	0	31	0	1 cited is ma	No	fn-101	mb-01111	ax-1011011	ku-01	ss-111110101110
PID0237	Dahlmann2015-ew	Pechr	milR-23		SRR1705825	23637125	1.3115	31	27	0.870968	UAGACUGUUCCAAGGAUGCU		UAGACUGUUCCAAGGAUGCU	16	0	16	0	1 cited is ma	Yes	fn-111	mb-00110	ax-0011010	ku-01	ss-111111101110
PID0237	Dahlmann2015-ew	Pechr	milR-23		SRR1705826	25524365	1.41042	36	33	0.916667	UAGACUGUUCCAAGGAUGCU		UAGACUGUUCCAAGGAUGCU	23	0	23	0	1 cited is ma	Yes	fn-111	mb-00110	ax-0011010	ku-01	ss-111111101110
PID0238	Dahlmann2015-ew	Pechr	milR-24		SRR1705826	25524365	1.37124	35	26	0.742857	UGCACAAGUGGACUCUCCCU	CCAGACAGAGCUUGUGCGCGUC	UGCACAAGUGGACUCUCCCU	22	0	22	0	1 cited is ma	No	fn-101	mb-01111	ax-1001011	ku-01	ss-111110101110
PID0238	Dahlmann2015-ew	Pechr	milR-24		SRR1705825	23637125	1.18458	28	16	0.571429	UGCACAAGUGGACUCUCCCU	CCAGACAGAGCUUGUGCGCGUC	UGCACAAGUGGACUCUCCCU	12	0	12	0	1 cited is ma	No	fn-101	mb-01111	ax-1001011	ku-01	ss-111110101100
PID0239	Dahlmann2015-ew	Pechr	milR-25		SRR1705826	25524365	0.0391783	1	1	1	CUCGAAGUUGAAGGGCUC	GCAAAACUUGGAGAAGCGA	UCAUCGGCAAAACUUGGAGAA	0	0	1	0	3 cited not expressed	No	fn-011	mb-00011	ax-1001101	ku-01	ss-100011101110
PID0239	Dahlmann2015-ew	Pechr	milR-25		SRR1705825	23637125	0	0	0	NA	UCAUCGGCAAAACUUGGAGAA	CUCGAAGUUGAAGGGCUCCUGAC	UCAUCGGCAAAACUUGGAGAA	0	0	0	0	4 locus not expressed	No	fn-001	mb-01011	ax-1001011	ku-01	ss-000110001100
PID0241	Dahlmann2015-ew	Pechr	milR-27		SRR1705825	23637125	1.05766	25	23	0.92	UCUACCGAGACUGUCUUUGA	GGAGUCAGCCUCGGAGCUU	UCUACCGAGACUGUCUUUGA	21	0	21	0	1 cited is ma	Yes	fn-111	mb-01011	ax-1001111	ku-01	ss-111111101110
PID0241	Dahlmann2015-ew	Pechr	milR-27		SRR1705826	25524365	1.21453	31	31	1	UCUACCGAGACUGUCUUUGA	GGAGUCAGCCUCGGAGCUU	UCUACCGAGACUGUCUUUGA	26	0	26	0	1 cited is ma	Yes	fn-111	mb-01011	ax-1001111	ku-01	ss-111111101110
PID0242	Dahlmann2015-ew	Pechr	milR-28		SRR1705826	25524365	0.274248	7	2	0.285714	UUAGCAUGCAUGGUAUUGUA		UUAGCAUGCAUGGUAUUGUA	2	0	2	0	1 cited is ma	No	fn-001	mb-00010	ax-0001010	ku-01	ss-111110001000
PID0242	Dahlmann2015-ew	Pechr	milR-28		SRR1705825	23637125	0.253838	6	2	0.333333	UUAGCAUGCAUGGUAUUGUA		UUAGCAUGCAUGGUAUUGUA	2	0	2	0	1 cited is ma	No	fn-001	mb-00010	ax-0001010	ku-01	ss-101110001000
PID0244	Dahlmann2015-ew	Pechr	milR-30		SRR1705825	23637125	0.507676	12	11	0.916667	UACCAAGUCGUCGAAAUGCU	ACAAUCGCCACCUGUC	UACCAAGUCGUCGAAAUGCU	11	0	11	0	1 cited is ma	No	fn-011	mb-01010	ax-1001111	ku-01	ss-111111101010
PID0244	Dahlmann2015-ew	Pechr	milR-30		SRR1705826	25524365	1.48877	38	38	1	UACCAAGUCGUCGAAAUGCU	ACAAUCGCCACCUGUC	UACCAAGUCGUCGAAAUGCU	35	0	35	0	1 cited is ma	Yes	fn-111	mb-01010	ax-1001111	ku-01	ss-111111101010
PID0245	Dahlmann2015-ew	Pechr	milR-31		SRR1705826	25524365	2.7033	69	57	0.826087	UGAGACCGCGGAGCAAACG	UUUGCGCAAAAGGUUGGAGG	UGAGACCGCGGAGCAAACG	53	0	53	0	1 cited is ma	Yes	fn-111	mb-01010	ax-1001101	ku-01	ss-101011101110
PID0245	Dahlmann2015-ew	Pechr	milR-31		SRR1705825	23637125	5.03445	119	69	0.579832	UGAGACCGCGGAGCAAACG	UUUGCGCAAAAGGUUGGAGG	UGAGACCGCGGAGCAAACG	53	0	53	0	1 cited is ma	No	fn-101	mb-01010	ax-1001001	ku-01	ss-101010101100
PID0246	Dahlmann2015-ew	Pechr	milR-32		SRR1705826	25524365	0.861922	22	19	0.863636	UGGAGAAUGUCACUUGUGGA	UUCAGGUGCCUCUUCACU	UGGAGAAUGUCACUUGUGGAA	2	0	5	0	2 cited is not ma	No	fn-011	mb-01011	ax-1011011	ku-01	ss-111111111100
PID0246	Dahlmann2015-ew	Pechr	milR-32		SRR1705825	23637125	0.846127	20	16	0.8	UCACUUGUGGAAUGUAUGCCU	CUUCAGGUGCCUCUUCACU	UGGAGAAUGUCACUUGUGGAA	3	0	5	0	2 cited is not ma	No	fn-001	mb-00010	ax-1011011	ku-01	ss-101110111100
PID0247	Dahlmann2015-ew	Pechr	milR-33		SRR1705826	25524365	1.21453	31	31	1	AUGCCCUUCGGCGUUAGUCUACC	UAGCUAACGCCCAAGGGCAUU	AUGCCCUUCGGCGUUAGUCUACC	11	0	11	0	1 cited is ma	Yes	fn-111	mb-01011	ax-1011011	ku-01	ss-101111111110
PID0247	Dahlmann2015-ew	Pechr	milR-33		SRR1705825	23637125	1.14227	27	27	1	AUGCCCUUCGGCGUUAGUCUACC	UAGCUAACGCCCAAGGGCAUU	AUGCCCUUCGGCGUUAGUCUACC	7	0	7	0	1 cited is ma	No	fn-011	mb-01011	ax-1011011	ku-01	ss-101111111100
PID0248	Dahlmann2015-ew	Pechr	milR-34		SRR1705825	23637125	2.11532	50	33	0.66	UUUCCCAUCUCGAUCACCGGA	GUCAGAUCAGAUCCCGGCAGAUU	UUUCCCAUCUCGAUCACCGGA	30	0	30	0	1 cited is ma	No	fn-101	mb-01110	ax-1001011	ku-01	ss-111110101110
PID0248	Dahlmann2015-ew	Pechr	milR-34		SRR1705826	25524365	1.72384	44	27	0.613636	UUUCCCAUCUCGAUCACCGGA	GUCAGAUCAGAUCCCGGCAGAUU	UUUCCCAUCUCGAUCACCGGA	26	0	26	0	1 cited is ma	No	fn-101	mb-01010	ax-1001011	ku-01	ss-111110101110
PID0249	Lin2015-zy	Tacam	aci-milR-1		SRR1662192	6309236	9.66837	61	61	1	UACCCGACUGGAGGACGAGA	UUGGACCCAGUGUAUU	UACCCGACUGGAGGACGAGAUU	8	0	17	0	2 cited is not ma	Yes	fn-111	mb-01011	ax-1011011	ku-01	ss-101111111010
PID0249	Lin2015-zy	Tacam	aci-milR-1		SRR1662191	14033933	168.378	2363	2363	1	UACCCGACUGGAGGACGAGAU	AUUGGACCCAGUGUAUU	UACCCGACUGGAGGACGAGAUU	290	0	537	0	2 cited is not ma	Yes	fn-111	mb-00010	ax-1001011	ku-11	ss-111111101010
PID0250	Lin2015-zy	Tacam	aci-milR-2a-1		SRR1662191	14033933	24000.5	336821	336791	0.999911	CUGCGAUGGAUGACUGCGACGA	GUUGUCAGUUGUACAUCGCACUA	CUGCGAUGGAUGACUGCGACGACGAU	528	27	203799	0	2 cited is not ma	Yes	fn-111	mb-01111	ax-1011111	ku-11	ss-111111111110
PID0250	Lin2015-zy	Tacam	aci-milR-2a-1		SRR1662192	6309236	6558.48	41379	41378	0.999976	CUGCGAUGGAUGACUGCGACGA	GUUGUCAGUUGUACAUCGCACUA	CUGCGAUGGAUGACUGCGACGACGAU	0	0	18302	0	3 cited not expressed	Yes	fn-111	mb-01111	ax-1011111	ku-11	ss-111111111110
PID0262	Lin2015-zy	Tacam	aci-milR-3a-1		SRR1662191	14033933	7681.6	107803	107796	0.999935	CGGUCCUGGACGUCCGUUUACGCA	CGAAACGGACGUCAGGACCAGA	GAAACGGACGUCAGGACCAG	99	0	81206	106	2 cited is not ma	Yes	fn-111	mb-11111	ax-1111111	ku-11	ss-111111111111
PID0262	Lin2015-zy	Tacam	aci-milR-3a-1		SRR1662192	6309236	2955.03	18644	18644	1	CGGUCCUGGACGUCCGUUUACGCA	CGAAACGGACGUCAGGACCAGA	GAAACGGACGUCAGGACCAG	20	0	8614	76	2 cited is not ma	Yes	fn-111	mb-11111	ax-1111011	ku-11	ss-111111111111
PID0266	Lin2015-zy	Tacam	aci-milR-3b-5		SRR1662191	14033933	0.142512	2	2	1	UGCUUGCGUUGAGGAUG	UCCUGGACGUCCGUUUACG	CGGUCCUGGACGUCCGUUUACG	0	0	1	0	3 cited not expressed	No	fn-011	mb-01011	ax-1011001	ku-01	ss-100011111100
PID0266	Lin2015-zy	Tacam	aci-milR-3b-5		SRR1662192	6309236	0	0	0	NA	CGGUCCUGGACGUCCGUUUACG	UGCUUGCGUUGAGGAUGGGU	CGGUCCUGGACGUCCGUUUACG	0	0	0	0	4 locus not expressed	No	fn-001	mb-01011	ax-1011011	ku-01	ss-000110011100
PID0269	Lin2015-zy	Tacam	aci-milR-4		SRR1662192	6309236	229.663	1449	1425	0.983437	UGCGAUCGGACUUUUUGGAAU	UCCAAGAAGUCCUCUCGCGGG	UGCGAUCGGACUUUUUGGAA	32	0	540	0	2 cited is not ma	Yes	fn-111	mb-01011	ax-1011011	ku-11	ss-111111111100
PID0269	Lin2015-zy	Tacam	aci-milR-4		SRR1662191	14033933	291.793	4095	1701	0.415385	UGCGAUCGGACUUUUUGGAAUCG	CCAAGAAGUCCUCUCGCGGG	UGCGAUCGGACUUUUUGGAA	36	0	969	0	2 cited is not ma	No	fn-101	mb-00011	ax-1011011	ku-11	ss-111110011100
PID0270	Lin2015-zy	Tacam	aci-milR-5		SRR1662192	6309236	54.3647	343	343	1	AAAGAAUAGCAAAGAGUGAACA	UUCACUCUUUGGCAUUCUUUG	AAGAAUAGCAAAGAGUGAACAG	7	0	53	0	2 cited is not ma	Yes	fn-111	mb-01011	ax-1011011	ku-01	ss-111111111110
PID0270	Lin2015-zy	Tacam	aci-milR-5		SRR1662191	14033933	129.686	1820	1806	0.992308	AAAGAAUAGCAAAGAGUGAA	CACUCUUUGGCAUUCUUUG	AAGAAUAGCAAAGAGUGAACAG	53	1	273	0	2 cited is not ma	Yes	fn-111	mb-01111	ax-1011011	ku-01	ss-101111111100
PID0271	Lin2015-zy	Tacam	aci-milR-6a-1		SRR1662191	14033933	919.129	12899	12894	0.999612	GCGAUCCUCAUGCGCUGUCGAU	CGAUCCUCAUGCGCUGUCGAUGC	AUCGGCAGCGUAUGGGGAUGAUG	809	223	2205	0	2 cited is not ma	Yes	fn-111	mb-00111	ax-1011011	ku-11	ss-111111111110
PID0271	Lin2015-zy	Tacam	aci-milR-6a-1		SRR1662192	6309236	56.7422	358	358	1	UCCUCAUGCGCUGUCGAUGCA	CAUCGGCAGCGUAUGGGGAUG	AUCGGCAGCGUAUGGGGAUGAUG	10	1	61	0	2 cited is not ma	Yes	fn-111	mb-01111	ax-1011011	ku-01	ss-111111111100
PID0277	Lin2015-zy	Tacam	aci-milR-7-3		SRR1662191	14033933	51.7318	726	711	0.979339	GGGGGUAGAUUAGUUUUUACAUAGAUA	UCUAUGUUAAGCUAAUUGGCUUUAG	CAUCUAUGUUAAGCUAAUUGGCUUUAGUU	14	3	24	0	2 cited is not ma	Yes	fn-111	mb-01011	ax-1011001	ku-01	ss-101011111100
PID0277	Lin2015-zy	Tacam	aci-milR-7-3		SRR1662192	6309236	34.2355	216	214	0.990741	GUAGUAGUUUUCAAGCUAUU	UAGUCAAUUAUUAAAA	CAUCUAUGUUAAGCUAAUUGGCUUUAGUU	6	1	7	0	2 cited is not ma	Yes	fn-111	mb-01011	ax-1011011	ku-01	ss-101111101000
PID0278	Lin2015-zy	Tacam	aci-milR-9		SRR1662192	6309236	23.4577	148	145	0.97973	UGGCUUCUCUCUAUCCUCGCAGACU	CUUGUGAGGAUGAGGGGUCCACA	UGGCUUCUCUCUAUCCUCGCAG	10	0	35	1	2 cited is not ma	Yes	fn-111	mb-01111	ax-1111001	ku-01	ss-101011111101
PID0278	Lin2015-zy	Tacam	aci-milR-9		SRR1662191	14033933	92.7039	1301	1278	0.982321	UGGCUUCUCUCUAUCCUCGCAGACU	CUUGUGAGGAUGAGGGGUCCACA	UGGCUUCUCUCUAUCCUCGCAG	26	0	408	0	2 cited is not ma	Yes	fn-111	mb-01111	ax-1011001	ku-11	ss-101011111100
PID0280	Lin2015-zy	Tacam	aci-milR-10-2		SRR1662192	6309236	733.211	4626	4621	0.998919	UACUGUGACAAGAACCCAAAGUAUU	AUACCAUGAGAAUGGAAGAACCCAGACC	UCUGGGUUCUUCCUCUCAUAUGU	17	0	458	0	2 cited is not ma	Yes	fn-111	mb-00110	ax-1011001	ku-11	ss-101011111000
PID0280	Lin2015-zy	Tacam	aci-milR-10-2		SRR1662191	14033933	65.8404	924	703	0.760823	UACUGUGACAAGAACCCAAAGUAUUG	AUACCAUGAGAAUGGAAGAACCCAGACC	UCUGGGUUCUUCCUCUCAUAUGU	1	0	116	0	2 cited is not ma	No	fn-101	mb-00110	ax-1011001	ku-01	ss-101010111000
PID0281	Lin2015-zy	Tacam	aci-milR-11		SRR1662191	14033933	421.977	5922	5914	0.998649	AGUGGAAGAGUGCACAUCCG	GUCUUGCACAUUCCAUCAGCUUC	UUCCAUCAGCUUCUUGUAAGGCU	48	0	1085	0	2 cited is not ma	Yes	fn-111	mb-01011	ax-1001011	ku-11	ss-101111101100
PID0281	Lin2015-zy	Tacam	aci-milR-11		SRR1662192	6309236	10.4609	66	65	0.984848	AGUGGAAGAGUGCACAUCCG	GUCUUGCACAUUCCAUCAGCUUC	UUCCAUCAGCUUCUUGUAAGGCU	0	0	10	0	3 cited not expressed	Yes	fn-111	mb-01011	ax-1001011	ku-01	ss-101111101100
PID0282	Lin2015-zy	Tacam	aci-milR-12		SRR1662191	14033933	144.578	2029	2029	1	GGGUCUUUCUUUGGUGAUACGAGAUUCAUC	AGGAUUUUCCCGUGCAUCGAAGGAGACCAACAGAUU	GGUCUUUCUUUGGUGAUACGAGA	21	0	223	0	2 cited is not ma	Yes	fn-111	mb-00011	ax-1001001	ku-01	ss-101011101000
PID0282	Lin2015-zy	Tacam	aci-milR-12		SRR1662192	6309236	46.4399	293	292	0.996587	UCCCGUGCAUCGAAGGAGACCAACAGAU		GGUCUUUCUUUGGUGAUACGAGA	4	0	22	0	2 cited is not ma	Yes	fn-111	mb-00010	ax-0011000	ku-01	ss-101011101000
PID0283	Lin2015-zy	Tacam	aci-milR-13		SRR1662191	14033933	101.112	1419	1419	1	UACAUUAGUUAAUAGGAUCAAGA	UUGAUUCUAUCAACUGAUAUAUG	CAUUAGUUAAUAGGAUCAAGAC	7	0	281	0	2 cited is not ma	Yes	fn-111	mb-01011	ax-1011011	ku-11	ss-111111111100
PID0283	Lin2015-zy	Tacam	aci-milR-13		SRR1662192	6309236	149.939	946	946	1	UACAUUAGUUAAUAGGAUCAAGA	UUGAUUCUAUCAACUGAUAUAUG	CAUUAGUUAAUAGGAUCAAGAC	12	0	191	0	2 cited is not ma	Yes	fn-111	mb-01011	ax-1011011	ku-11	ss-111111111100
PID0284	Lin2015-zy	Tacam	aci-milR-14a-2		SRR1662192	6309236	2353.85	14851	14851	1	UACUGAGGGGUCGUCUAGACAGUU	UACUGAGGGGUCGUCUAGACAG	GUCCAGGGGGCCCCUCAGUAUC	1	1232	4869	0	2 cited is not ma	Yes	fn-111	mb-00111	ax-1011011	ku-11	ss-101111111110
PID0284	Lin2015-zy	Tacam	aci-milR-14a-2		SRR1662191	14033933	4090.09	57400	57393	0.999878	UACUGAGGGGUCGUCUAGACAGUU	UACUGAGGGGUCGUCUAGACAG	GUCCAGGGGGCCCCUCAGUAUC	14	6526	14420	0	2 cited is not ma	Yes	fn-111	mb-00011	ax-1011011	ku-11	ss-101111111110
PID0289	Lin2015-zy	Tacam	aci-milR-15a-3		SRR1662192	6309236	4113.81	25955	25941	0.999461	CCUUUUGGCUUCAAGGUCCU	CGGGUUGAAGACAUUGUCAGGUG	CCUUUAUCGUCUUUUUACUUAUU	9	2	2411	0	2 cited is not ma	Yes	fn-111	mb-00011	ax-1001011	ku-11	ss-101111101100
PID0289	Lin2015-zy	Tacam	aci-milR-15a-3		SRR1662191	14033933	7657.01	107458	107353	0.999023	GGGCUGAUCCGGGUUGA	CGGGUUGAAGACAUUGUCAGGUG	CCUUUAUCGUCUUUUUACUUAUU	54	36	2908	0	2 cited is not ma	Yes	fn-111	mb-00011	ax-1001001	ku-11	ss-101011101100
PID0295	Lin2015-zy	Tacam	aci-milR-16-2		SRR1662192	6309236	5.54742	35	33	0.942857	GGAUGCUUACGAAUACGAUGGA	UGUUUAUUACCGGCAUUCUU	AGGAUGCUUACGAAUACGAUGGA	0	0	9	0	3 cited not expressed	Yes	fn-111	mb-01011	ax-1011011	ku-01	ss-101111111100
PID0295	Lin2015-zy	Tacam	aci-milR-16-2		SRR1662191	14033933	41.6134	584	579	0.991438	GGAUGCUUACGAAUACGAUGGAC	CUGUUUAUUACCGGCAUUCUU	AGGAUGCUUACGAAUACGAUGGA	11	0	54	0	2 cited is not ma	Yes	fn-111	mb-01011	ax-1011011	ku-01	ss-101111101100
PID0296	Lin2015-zy	Tacam	aci-milR-17a-1		SRR1662192	6309236	573.445	3618	3616	0.999447	UGCUCUGGUACUUCCUUGACCACA	AUGAGAAUGGAAGAUGCUCAGACC	UCUGAUUGUCUUCCUUCUCAUGG	29	11	530	0	2 cited is not ma	Yes	fn-111	mb-00110	ax-1011011	ku-11	ss-101111111100
PID0296	Lin2015-zy	Tacam	aci-milR-17a-1		SRR1662191	14033933	885.639	12429	4386	0.352884	UGCUCUGGUACUUCCUUGACCACA	AUGAGAAUGGAAGAUGCUCAGACC	UCUGAUUGUCUUCCUUCUCAUGG	14	17	840	0	2 cited is not ma	No	fn-101	mb-00110	ax-1011011	ku-11	ss-111110011100
PID0302	Lin2015-zy	Tacam	aci-milR-17c-1		SRR1662191	14033933	812.958	11409	7981	0.699535	AUGGUAUGUGCCCUAGUGCUUCC	AAGUACCAGAGCACAGUCCAUGA	AAGUACCAGAGCACAGUCCAUGA	204	1553	1553	204	2 cited is not ma	No	fn-101	mb-11111	ax-1111011	ku-11	ss-111110111101
PID0302	Lin2015-zy	Tacam	aci-milR-17c-1		SRR1662192	6309236	412.253	2601	2	0.000768935	AUGGUAUGUGCCCUAGUGCU	UACCAGAGCACAGUCCAUGA	AAGUACCAGAGCACAGUCCAUGA	0	0	1	0	3 cited not expressed	No	fn-001	mb-01011	ax-1011011	ku-01	ss-100111011100
PID0304	Lin2015-zy	Tacam	aci-milR-18		SRR1662191	14033933	185.479	2603	2570	0.987322	UUGCGUUCGACUUGUUCUCCCU	GGAAAACGAGCGGACACACGG	UUGCGUUCGACUUGUUCUCCC	114	0	887	0	2 cited is not ma	Yes	fn-111	mb-01111	ax-1011011	ku-11	ss-111111111110
PID0304	Lin2015-zy	Tacam	aci-milR-18		SRR1662192	6309236	1.10948	7	7	1	UCUCCCUCCGGGAAAACGAGCG	GAAAACGAGCGGACACACGG	UUGCGUUCGACUUGUUCUCCC	0	0	1	0	3 cited not expressed	No	fn-011	mb-00010	ax-1011011	ku-01	ss-100111111100
PID0305	Lin2015-zy	Tacam	aci-milR-19a-1		SRR1662191	14033933	312.813	4390	4388	0.999544	GUAUGUGACCUACAAUAGAGGUGC	ACCUCUAGUGCAGGUCACAUACUG	ACCUCUAGUGCAGGUCACAUACU	248	12	2127	9	2 cited is not ma	Yes	fn-111	mb-01111	ax-1111111	ku-11	ss-111111111111
PID0305	Lin2015-zy	Tacam	aci-milR-19a-1		SRR1662192	6309236	86.6983	547	547	1	ACCUCUAGUGCAGGUCACAUACU	UAUGUGACCUACAAUAGAGGUGC	ACCUCUAGUGCAGGUCACAUACU	113	0	113	0	1 cited is ma	Yes	fn-111	mb-01111	ax-1011011	ku-01	ss-111111111100
PID0308	Lin2015-zy	Tacam	aci-milR-20		SRR1662191	14033933	400.173	5616	5608	0.998575	CGUUUGGCUCGUCUCUUCGUGCUCU	UGGUGCGGGGAGCGAACCAGCGAGUUGGACGUA	CGUUUGGCUCGUCUCUUCGUGCUCU	198	0	198	0	1 cited is ma	Yes	fn-111	mb-01011	ax-1011001	ku-01	ss-101011111000
PID0308	Lin2015-zy	Tacam	aci-milR-20		SRR1662192	6309236	34.8695	220	220	1	UGGCUCGUCUCUUCGUGCUCUCGUG	UGGUGCGGGGAGCGAACCAGCGAGUUGGACGUAU	CGUUUGGCUCGUCUCUUCGUGCUCU	5	0	11	0	2 cited is not ma	Yes	fn-111	mb-00011	ax-1011001	ku-01	ss-101011111000
PID0309	Lin2015-zy	Tacam	aci-milR-21-1		SRR1662191	14033933	33.8465	475	467	0.983158	GUAAAGUUAAGAUGAAUUAAAGCUA	GCUUUGAAAAUCUUAACUUUAAUAU	GUAAAGUUAAGAUGAAUUAAAGC	13	0	24	2	2 cited is not ma	Yes	fn-111	mb-01011	ax-1111001	ku-01	ss-101011111101
PID0309	Lin2015-zy	Tacam	aci-milR-21-1		SRR1662192	6309236	9.03437	57	56	0.982456	UUUAAUAUAGCUAAUGUAAAG	UUUGAAAAUCUUAACUUUAAUAU	GUAAAGUUAAGAUGAAUUAAAGC	2	0	4	0	2 cited is not ma	Yes	fn-111	mb-00010	ax-1011011	ku-01	ss-101111111100
PID0447	Yang2015-wo	Zytri	novel_mir_1		SRR1738220	226313	22.0933	5	5	1	GGCCGGCUGGCUCAAUGGUA	CCGUUCACCAGCUAUUCUGGCUUUCGAG	GGCCGGCUGGCUCAAUGGUA	3	0	3	0	1 cited is ma	Yes	fn-111	mb-01011	ax-1001111	ku-01	ss-101111101010
PID0447	Yang2015-wo	Zytri	novel_mir_1		SRR1738218	88655	45.1187	4	4	1	GGCCGGCUGGCUCAAUGGUA	CCGUUCACCAGCUAUUCUGGCUUUCGAG	GGCCGGCUGGCUCAAUGGUA	1	0	1	0	1 cited is ma	Yes	fn-111	mb-01011	ax-1001011	ku-01	ss-100111101000
PID0451	Yang2015-wo	Zytri	novel_mir_5		SRR1738218	88655	180.475	16	12	0.75	UGCGACUGGUUUUGGCUUCG	AGUGUCGAGCCACACGCGAUCG	UGCGACUGGUUUUGGCUUCG	6	0	6	0	1 cited is ma	No	fn-101	mb-00011	ax-1011011	ku-11	ss-111110111100
PID0451	Yang2015-wo	Zytri	novel_mir_5		SRR1738220	226313	0	0	0	NA	UGCGACUGGUUUUGGCUUCG	AGUGUCGAGCCACACGCGAUCG	UGCGACUGGUUUUGGCUUCG	0	0	0	0	4 locus not expressed	No	fn-001	mb-00011	ax-1011011	ku-01	ss-000110011100
PID0452	Yang2015-wo	Zytri	novel_mir_6		SRR1738218	88655	214.314	19	19	1	UGACUGGGGAUUUGGACGGU	CGAUAGCGCUCAAGUCAUC	UGACUGGGGAUUUGGACGGU	9	0	9	0	1 cited is ma	Yes	fn-111	mb-01111	ax-1011011	ku-11	ss-111111101110
PID0452	Yang2015-wo	Zytri	novel_mir_6		SRR1738220	226313	0	0	0	NA	UGACUGGGGAUUUGGACGGU	CGAUAGCGCUCAAGUCAUC	UGACUGGGGAUUUGGACGGU	0	0	0	0	4 locus not expressed	No	fn-001	mb-01011	ax-1011011	ku-01	ss-000110001100
PID0453	Yang2015-wo	Zytri	novel_mir_7		SRR1738218	88655	135.356	12	12	1	UGCGAUAGGCUGGCUGUUUA	UGCAAACCAAGCCUCAUCGUAUC	UGCGAUAGGCUGGCUGUUUA	7	0	7	0	1 cited is ma	Yes	fn-111	mb-01111	ax-1001011	ku-11	ss-111111101110
PID0453	Yang2015-wo	Zytri	novel_mir_7		SRR1738220	226313	0	0	0	NA	UGCGAUAGGCUGGCUGUUUA	UGCAAACCAAGCCUCAUCGUAUC	UGCGAUAGGCUGGCUGUUUA	0	0	0	0	4 locus not expressed	No	fn-001	mb-01011	ax-1001011	ku-01	ss-000110001100
PID0454	Yang2015-wo	Zytri	novel_mir_8		SRR1738218	88655	293.272	26	18	0.692308	UGGACCAGACUGUUACAUGU	ACCCGAGCAGUCUGAACCUCC	UGGACCAGACUGUUACAUGU	11	0	11	0	1 cited is ma	No	fn-101	mb-01010	ax-1001011	ku-11	ss-111110101110
PID0454	Yang2015-wo	Zytri	novel_mir_8		SRR1738220	226313	4.41866	1	0	0	UGGACCAGACUGUUACAUGU	ACCCGAGCAGUCUGAACCUCC	UGGACCAGACUGUUACAUGU	0	0	0	0	3 cited not expressed	No	fn-001	mb-01010	ax-1001011	ku-01	ss-110111001100
PID0457	Yang2015-wo	Zytri	novel_mir_11		SRR1738218	88655	22.5594	2	2	1	UCUCAUGUGUCCAUGUUAGCU	CUAAUAUGGACACAUGAGUAU	UCUCAUGUGUCCAUGUUAGCU	1	0	1	0	1 cited is ma	Yes	fn-111	mb-01011	ax-1011111	ku-01	ss-110111111110
PID0457	Yang2015-wo	Zytri	novel_mir_11		SRR1738220	226313	0	0	0	NA	UCUCAUGUGUCCAUGUUAGCU	CUAAUAUGGACACAUGAGUAU	UCUCAUGUGUCCAUGUUAGCU	0	0	0	0	4 locus not expressed	No	fn-001	mb-01011	ax-1011011	ku-01	ss-000110011100
PID0458	Yang2015-wo	Zytri	novel_mir_12		SRR1738220	226313	79.5359	18	18	1	GGCGCUGUAGCAAAGUGGUUA	ACCAUUUUGCUAUUGUGUAGA	GGCGCUGUAGCAAAGUGGUUA	10	0	10	0	1 cited is ma	Yes	fn-111	mb-01011	ax-1011011	ku-11	ss-101111111110
PID0458	Yang2015-wo	Zytri	novel_mir_12		SRR1738218	88655	101.517	9	9	1	GGCGCUGUAGCAAAGUGGUUA	ACCAUUUUGCUAUUGUGUAGA	GGCGCUGUAGCAAAGUGGUUA	2	0	2	0	1 cited is ma	Yes	fn-111	mb-01011	ax-1011011	ku-11	ss-101111111100
PID0459	Lin2016-hq	Rhsol	Rhi-milR-77		SRR1994873	8626632	1.1592	10	10	1	GCGGGAUUGCAGUACAAAGGGAGAU	CCCCGUUGUGCUCAUUCUGCUG	GCGGGAUUGCAGUACAAAGGGAGA	1	0	2	0	2 cited is not ma	Yes	fn-111	mb-01111	ax-1011001	ku-01	ss-101011111100
PID0459	Lin2016-hq	Rhsol	Rhi-milR-77		SRR1994872	9065193	7.17028	65	65	1	GCGGGAUUGCAGUACAAAGGGAGAU	CCCCGUUGUGCUCAUUCUGCUG	GCGGGAUUGCAGUACAAAGGGAGA	5	0	13	0	2 cited is not ma	Yes	fn-111	mb-01011	ax-1011001	ku-01	ss-101011111100
PID0459	Lin2016-hq	Rhsol	Rhi-milR-77		SRR1994875	4270606	0.936635	4	4	1	CCCCGUUGUGCUCAUUCUGCUG	GCGGGAUUGCAGUACAAAGGGAGAU	GCGGGAUUGCAGUACAAAGGGAGA	0	0	1	0	3 cited not expressed	No	fn-011	mb-01011	ax-1011011	ku-01	ss-100111111100
PID0459	Lin2016-hq	Rhsol	Rhi-milR-77		SRR1994877	6052857	0.330422	2	2	1	GCGGGAUUGCAGUACAAAG	UUGUGCUCAUUCUGCUG	GCGGGAUUGCAGUACAAAGGGAGA	0	0	1	0	3 cited not expressed	No	fn-011	mb-01011	ax-1011101	ku-01	ss-100011111110
PID0459	Lin2016-hq	Rhsol	Rhi-milR-77		SRR1994871	8692379	0.69026	6	6	1	AUGCGGGAUUGCAGUACAAAGGGAGAU	CCCCGUUGUGCUCAUUCUGCUGAU	GCGGGAUUGCAGUACAAAGGGAGA	0	0	2	0	3 cited not expressed	No	fn-011	mb-01011	ax-1001001	ku-01	ss-101011101100
PID0459	Lin2016-hq	Rhsol	Rhi-milR-77		SRR1994876	6833927	0.731644	5	5	1	UGCGGGAUUGCAGUACAAAGGGAGAU	CCCCGUUGUGCUCAUUCUGCUGA	GCGGGAUUGCAGUACAAAGGGAGA	0	0	1	0	3 cited not expressed	No	fn-011	mb-01011	ax-1001001	ku-01	ss-100011101100
PID0459	Lin2016-hq	Rhsol	Rhi-milR-77		SRR1994874	9302637	0.322489	3	3	1	CUGAUUGGAUGCGGGAUUGCAGUAC	CCCGUUGUGCUCAUUCUGCUG	GCGGGAUUGCAGUACAAAGGGAGA	0	0	1	0	3 cited not expressed	No	fn-011	mb-00010	ax-1001001	ku-01	ss-100011101100
PID0460	Lin2016-hq	Rhsol	Rhi-milR-154		SRR1994872	9065193	4.52279	41	41	1	AUGUUGGAAGAAUUGCAGGGCUCG	UGGCCUGUAUCUUCUUAACAGUU	UGUUGGAAGAAUUGCAGG	0	0	6	0	3 cited not expressed	Yes	fn-111	mb-01011	ax-1001011	ku-01	ss-101111101100
PID0460	Lin2016-hq	Rhsol	Rhi-milR-154		SRR1994871	8692379	0.115043	1	1	1	AAGAAUUGCAGGGCUCGCGUGGC	UGUAUCUUCUUAACAGU	UGUUGGAAGAAUUGCAGG	0	0	1	0	3 cited not expressed	No	fn-011	mb-00010	ax-1001111	ku-01	ss-110111101110
PID0460	Lin2016-hq	Rhsol	Rhi-milR-154		SRR1994876	6833927	0.731644	5	5	1	CAAUGUUGGAAGAAUUGCAGGGC	CCUGUAUCUUCUUAACAGUUAAUG	UGUUGGAAGAAUUGCAGG	0	0	1	0	3 cited not expressed	No	fn-011	mb-00011	ax-1001011	ku-01	ss-100111101100
PID0460	Lin2016-hq	Rhsol	Rhi-milR-154		SRR1994873	8626632	2.43432	21	21	1	CGCAAUGUUGGAAGAAUUGCAGGGCUCG	UGGCCUGUAUCUUCUUAACAGUUAAUGCA	UGUUGGAAGAAUUGCAGG	0	0	2	0	3 cited not expressed	No	fn-011	mb-01011	ax-1001001	ku-01	ss-101011101100
PID0460	Lin2016-hq	Rhsol	Rhi-milR-154		SRR1994877	6052857	0.495634	3	3	1	UUGGAAGAAUUGCAGGGCUCGCG	UGUAUCUUCUUAACAGU	UGUUGGAAGAAUUGCAGG	0	0	1	0	3 cited not expressed	No	fn-011	mb-00011	ax-1001011	ku-01	ss-100111101100
PID0460	Lin2016-hq	Rhsol	Rhi-milR-154		SRR1994874	9302637	0.859971	8	8	1	CGCAAUGUUGGAAGAAUUGCAGGGCUC	GGCCUGUAUCUUCUUAACAGUUAAUGCA	UGUUGGAAGAAUUGCAGG	0	0	1	0	3 cited not expressed	No	fn-011	mb-01011	ax-1001001	ku-01	ss-100011101100
PID0460	Lin2016-hq	Rhsol	Rhi-milR-154		SRR1994875	4270606	0	0	0	NA	UGUUGGAAGAAUUGCAGG	UGUAUCUUCUUAACAGU	UGUUGGAAGAAUUGCAGG	0	0	0	0	4 locus not expressed	No	fn-001	mb-01011	ax-1001001	ku-01	ss-000010001100
PID0461	Lin2016-hq	Rhsol	Rhi-milR-12		SRR1994875	4270606	1.40495	6	6	1	UAACGGUAACUGUGGCAUGG	AUGCCCAUUACCUUAUG	ACGGUAACUGUGGCAUGGGGUGA	0	0	3	0	3 cited not expressed	Yes	fn-111	mb-01011	ax-1011011	ku-01	ss-101111111000
PID0461	Lin2016-hq	Rhsol	Rhi-milR-12		SRR1994871	8692379	2.30087	20	19	0.95	UAACGGUAACUGUGGCAUGG	AUGCCCAUUACCUUAUG	ACGGUAACUGUGGCAUGGGGUGA	1	0	4	0	2 cited is not ma	No	fn-011	mb-01011	ax-1011011	ku-01	ss-101111111000
PID0461	Lin2016-hq	Rhsol	Rhi-milR-12		SRR1994872	9065193	1.98562	18	18	1	AACGGUAACUGUGGCAUGGGGUGAACAU	GUUCACCACAUGCCCAUUACCUUAU	ACGGUAACUGUGGCAUGGGGUGA	0	0	4	0	3 cited not expressed	Yes	fn-111	mb-01011	ax-1011001	ku-01	ss-101011111100
PID0461	Lin2016-hq	Rhsol	Rhi-milR-12		SRR1994876	6833927	1.75595	12	12	1	AACGGUAACUGUGGCAUGGGGUGAACA	UUCACCACAUGCCCAUUACCUUAU	ACGGUAACUGUGGCAUGGGGUGA	0	0	3	0	3 cited not expressed	Yes	fn-111	mb-01011	ax-1011001	ku-01	ss-101011111100
PID0461	Lin2016-hq	Rhsol	Rhi-milR-12		SRR1994874	9302637	1.07496	10	8	0.8	UAACGGUAACUGUGGCAUGG	AUGCCCAUUACCUUAUG	ACGGUAACUGUGGCAUGGGGUGA	0	0	2	0	3 cited not expressed	No	fn-001	mb-01011	ax-1011011	ku-01	ss-101110111000
PID0461	Lin2016-hq	Rhsol	Rhi-milR-12		SRR1994877	6052857	2.9738	18	17	0.944444	UAUAACGGUAACUGUGGCAUG	UGCCCAUUACCUUAUGGC	ACGGUAACUGUGGCAUGGGGUGA	0	0	2	0	3 cited not expressed	No	fn-011	mb-01011	ax-1011011	ku-01	ss-101111111000
PID0461	Lin2016-hq	Rhsol	Rhi-milR-12		SRR1994873	8626632	1.39104	12	12	1	CGGUAACUGUGGCAUGGGGUGAACAUA	UGUUCACCACAUGCCCAUUACCUU	ACGGUAACUGUGGCAUGGGGUGA	0	0	2	0	3 cited not expressed	No	fn-011	mb-01011	ax-1011001	ku-01	ss-101011111100
PID0462	Lin2016-hq	Rhsol	Rhi-milR-136		SRR1994872	9065193	2.97843	27	25	0.925926	UGGAAGCAGGUAUUGGAUGAUGG	AUUGCUGGUAUUUGCUCUCAUU	UGGAAGCAGGUAUUGGAUGAUG	4	0	15	0	2 cited is not ma	Yes	fn-111	mb-01011	ax-1011111	ku-01	ss-111111111110
PID0462	Lin2016-hq	Rhsol	Rhi-milR-136		SRR1994876	6833927	0.585315	4	4	1	UGGAAGCAGGUAUUGGAUGAUGG	AUUGCUGGUAUUUGCUCUCAUU	UGGAAGCAGGUAUUGGAUGAUG	0	0	2	0	3 cited not expressed	No	fn-011	mb-01011	ax-1011111	ku-01	ss-111111111110
PID0462	Lin2016-hq	Rhsol	Rhi-milR-136		SRR1994873	8626632	4.0572	35	34	0.971429	UGGAAGCAGGUAUUGGAUGAUGG	AUUGCUGGUAUUUGCUCUCAUU	UGGAAGCAGGUAUUGGAUGAUG	5	0	21	0	2 cited is not ma	Yes	fn-111	mb-01011	ax-1011111	ku-01	ss-111111111110
PID0462	Lin2016-hq	Rhsol	Rhi-milR-136		SRR1994877	6052857	2.47817	15	13	0.866667	UGGAAGCAGGUAUUGGAUGAUGG	AUUGCUGGUAUUUGCUCUCAUU	UGGAAGCAGGUAUUGGAUGAUG	2	0	8	0	2 cited is not ma	Yes	fn-111	mb-01011	ax-1011111	ku-01	ss-111111111110
PID0462	Lin2016-hq	Rhsol	Rhi-milR-136		SRR1994871	8692379	0.805303	7	6	0.857143	UGGAAGCAGGUAUUGGAUGAUGG	AUUGCUGGUAUUUGCUCUCAUU	UGGAAGCAGGUAUUGGAUGAUG	0	0	4	0	3 cited not expressed	No	fn-011	mb-01011	ax-1011011	ku-01	ss-111111111110
PID0462	Lin2016-hq	Rhsol	Rhi-milR-136		SRR1994874	9302637	2.47242	23	18	0.782609	UGGAAGCAGGUAUUGGAUGAUGG	AUUGCUGGUAUUUGCUCUCAUU	UGGAAGCAGGUAUUGGAUGAUG	5	0	7	0	2 cited is not ma	No	fn-101	mb-01011	ax-1011011	ku-01	ss-111110111110
PID0462	Lin2016-hq	Rhsol	Rhi-milR-136		SRR1994875	4270606	0.702476	3	3	1	UGGAAGCAGGUAUUGGAUGAUG	UUGCUGGUAUUUGCUCUCAUU	UGGAAGCAGGUAUUGGAUGAUG	2	0	2	0	1 cited is ma	Yes	fn-111	mb-01011	ax-1011111	ku-01	ss-111111111110
PID0463	Lin2016-hq	Rhsol	Rhi-milR-14		SRR1994872	9065193	7.72184	70	70	1	ACUGUCGACGGCGGGCUCCG	AUAAGGAGUCAUUGUUGCAGGCAGAUU	ACUGUCGACGGCGGGCUCCG	5	1	5	1	1 cited is ma	Yes	fn-111	mb-00110	ax-1101011	ku-01	ss-101111101001
PID0463	Lin2016-hq	Rhsol	Rhi-milR-14		SRR1994875	4270606	5.61981	24	24	1	ACUGUCGACGGCGGGCUCCG	AUAAGGAGUCAUUGUUGCAGGCAGAUU	ACUGUCGACGGCGGGCUCCG	6	0	6	0	1 cited is ma	Yes	fn-111	mb-00010	ax-1001011	ku-01	ss-101111101000
PID0463	Lin2016-hq	Rhsol	Rhi-milR-14		SRR1994871	8692379	0.34513	3	3	1	ACUGUCGACGGCGGGCUCCG	AUAAGGAGUCAUUGUUGCAGGCAGAUU	ACUGUCGACGGCGGGCUCCG	1	0	1	0	1 cited is ma	No	fn-011	mb-00010	ax-1001011	ku-01	ss-100111101000
PID0463	Lin2016-hq	Rhsol	Rhi-milR-14		SRR1994873	8626632	9.73729	84	84	1	AAGGAGUCAUUGUUGCAGGCAGA	UGUCGACGGCGGGCUCCGCAG	ACUGUCGACGGCGGGCUCCG	6	1	13	0	2 cited is not ma	Yes	fn-111	mb-01111	ax-1011011	ku-01	ss-101111101000
PID0463	Lin2016-hq	Rhsol	Rhi-milR-14		SRR1994874	9302637	6.34229	59	59	1	UACUGUCGACGGCGGGCUCCGC	UAUAAGGAGUCAUUGUUGCAGGCAGAUUU	ACUGUCGACGGCGGGCUCCG	2	0	6	0	2 cited is not ma	Yes	fn-111	mb-00010	ax-1001011	ku-01	ss-101111101000
PID0463	Lin2016-hq	Rhsol	Rhi-milR-14		SRR1994877	6052857	0.826056	5	5	1	AUACUGUCGACGGCGGGCUCCGC	UAUAAGGAGUCAUUGUUGCAGGCAGAUUUC	ACUGUCGACGGCGGGCUCCG	0	0	2	0	3 cited not expressed	No	fn-011	mb-00010	ax-1001011	ku-01	ss-101111101000
PID0463	Lin2016-hq	Rhsol	Rhi-milR-14		SRR1994876	6833927	1.17063	8	7	0.875	UGUACAUACUGUCGACGGCGGGCUCCGCAG	AUAAGGAGUCAUUGUUGCAGGCAGAUU	ACUGUCGACGGCGGGCUCCG	0	0	1	0	3 cited not expressed	No	fn-011	mb-00010	ax-1001001	ku-01	ss-100011101000
PID0464	Lin2016-hq	Rhsol	Rhi-milR-29		SRR1994872	9065193	7.72184	70	70	1	ACUGUCGACGGCGGGCUCCG	AUAAGGAGUCAUUGUUGCAGGCAGAUU	AGGAGUCAUUGUUGCAGGCAGA	2	0	5	1	2 cited is not ma	Yes	fn-111	mb-00110	ax-1101011	ku-01	ss-101111101001
PID0464	Lin2016-hq	Rhsol	Rhi-milR-29		SRR1994875	4270606	5.61981	24	24	1	ACUGUCGACGGCGGGCUCCG	AUAAGGAGUCAUUGUUGCAGGCAGAUU	AGGAGUCAUUGUUGCAGGCAGA	0	0	6	0	3 cited not expressed	Yes	fn-111	mb-00010	ax-1001011	ku-01	ss-101111101000
PID0464	Lin2016-hq	Rhsol	Rhi-milR-29		SRR1994873	8626632	9.73729	84	84	1	AAGGAGUCAUUGUUGCAGGCAGA	UGUCGACGGCGGGCUCCGCAG	AGGAGUCAUUGUUGCAGGCAGA	2	0	13	0	2 cited is not ma	Yes	fn-111	mb-01111	ax-1011011	ku-01	ss-101111101000
PID0464	Lin2016-hq	Rhsol	Rhi-milR-29		SRR1994874	9302637	6.34229	59	59	1	UACUGUCGACGGCGGGCUCCGC	UAUAAGGAGUCAUUGUUGCAGGCAGAUUU	AGGAGUCAUUGUUGCAGGCAGA	1	0	6	0	2 cited is not ma	Yes	fn-111	mb-00010	ax-1001011	ku-01	ss-101111101000
PID0464	Lin2016-hq	Rhsol	Rhi-milR-29		SRR1994876	6833927	1.17063	8	7	0.875	AGGAGUCAUUGUUGCAGGCAGA	UGUCGACGGCGGGCUCCGCA	AGGAGUCAUUGUUGCAGGCAGA	1	0	1	0	1 cited is ma	No	fn-011	mb-01011	ax-1011011	ku-01	ss-100111101000
PID0464	Lin2016-hq	Rhsol	Rhi-milR-29		SRR1994871	8692379	0.34513	3	3	1	UACUGUCGACGGCGGGCUCCGCA	CUAUAAGGAGUCAUUGUUGCAGGCAGAUUU	AGGAGUCAUUGUUGCAGGCAGA	0	0	1	0	3 cited not expressed	No	fn-011	mb-01010	ax-1001011	ku-01	ss-100111101000
PID0464	Lin2016-hq	Rhsol	Rhi-milR-29		SRR1994877	6052857	0.826056	5	5	1	AUACUGUCGACGGCGGGCUCCGC	UAUAAGGAGUCAUUGUUGCAGGCAGAUUUC	AGGAGUCAUUGUUGCAGGCAGA	0	0	2	0	3 cited not expressed	No	fn-011	mb-00010	ax-1001011	ku-01	ss-101111101000
PID0467	Lin2016-hq	Rhsol	Rhi-milR-124		SRR1994876	6833927	0.877973	6	6	1	UGAAGAGGCUGGAGACUUGUA	CAAGAAAUUCAACUCUUCAA	UGAAGAGGCUGGAGACUUGU	0	0	3	0	3 cited not expressed	Yes	fn-111	mb-01011	ax-1011111	ku-01	ss-111111101110
PID0467	Lin2016-hq	Rhsol	Rhi-milR-124		SRR1994875	4270606	1.87327	8	8	1	UGAAGAGGCUGGAGACUUGUA	CAAGAAAUUCAACUCUUCAA	UGAAGAGGCUGGAGACUUGU	1	0	3	0	2 cited is not ma	Yes	fn-111	mb-01011	ax-1011111	ku-01	ss-111111101110
PID0467	Lin2016-hq	Rhsol	Rhi-milR-124		SRR1994872	9065193	6.61872	60	60	1	UGAAGAGGCUGGAGACUUGUA	CAAGAAAUUCAACUCUUCAA	UGAAGAGGCUGGAGACUUGU	2	0	6	0	2 cited is not ma	Yes	fn-111	mb-01011	ax-1011011	ku-01	ss-101111101100
PID0467	Lin2016-hq	Rhsol	Rhi-milR-124		SRR1994873	8626632	4.0572	35	35	1	UGAAGAGGCUGGAGACUUGUA	CAAGAAAUUCAACUCUUCAA	UGAAGAGGCUGGAGACUUGU	1	0	6	0	2 cited is not ma	Yes	fn-111	mb-01011	ax-1011011	ku-01	ss-101111101100
PID0467	Lin2016-hq	Rhsol	Rhi-milR-124		SRR1994874	9302637	1.18246	11	11	1	UGAAGAGGCUGGAGACUUGU	AAGAAAUUCAACUCUUCAA	UGAAGAGGCUGGAGACUUGU	1	0	1	0	1 cited is ma	No	fn-011	mb-01011	ax-1011011	ku-01	ss-110111111100
PID0467	Lin2016-hq	Rhsol	Rhi-milR-124		SRR1994877	6052857	0.495634	3	3	1	GUAGUAGCUCCAAGUAUGAAGA	UUCAACCGGAUG	UGAAGAGGCUGGAGACUUGU	0	0	1	0	3 cited not expressed	No	fn-011	mb-00010	ax-1001011	ku-01	ss-100111101000
PID0467	Lin2016-hq	Rhsol	Rhi-milR-124		SRR1994871	8692379	0.575217	5	5	1	UUCAACUCUUCAACCGGAU	UAGUAGCUCCAAGUAUGAAGAGGCUGGAGA	UGAAGAGGCUGGAGACUUGU	0	0	1	0	3 cited not expressed	No	fn-011	mb-00010	ax-1001001	ku-01	ss-100011101000
PID0468	Lin2016-hq	Rhsol	Rhi-milR-78		SRR1994872	9065193	6.94966	63	63	1	CGGAGAACAUUAACAGAGGGAGA	UUCCUCUGUUAACUGGGCUUCCGCG	GGAGAACAUUAACAGAGGGA	0	0	10	0	3 cited not expressed	Yes	fn-111	mb-01111	ax-1011011	ku-01	ss-101111101100
PID0468	Lin2016-hq	Rhsol	Rhi-milR-78		SRR1994873	8626632	2.08656	18	18	1	CGGAGAACAUUAACAGAGGGAGA	UUCCUCUGUUAACUGGGCUUCCGCG	GGAGAACAUUAACAGAGGGA	1	0	4	0	2 cited is not ma	Yes	fn-111	mb-01011	ax-1011011	ku-01	ss-101111101100
PID0468	Lin2016-hq	Rhsol	Rhi-milR-78		SRR1994876	6833927	1.31696	9	8	0.888889	CGGAGAACAUUAACAGAGGGA	CCUCUGUUAACUGGGCUUCCGCG	GGAGAACAUUAACAGAGGGA	0	0	2	0	3 cited not expressed	No	fn-011	mb-01011	ax-1011011	ku-01	ss-101111111100
PID0468	Lin2016-hq	Rhsol	Rhi-milR-78		SRR1994875	4270606	1.17079	5	5	1	CAUUAACAGAGGGAGAG	ACUUCCUCUGUUAACUGGG	GGAGAACAUUAACAGAGGGA	0	0	2	0	3 cited not expressed	No	fn-011	mb-01111	ax-1011001	ku-01	ss-101011111100
PID0468	Lin2016-hq	Rhsol	Rhi-milR-78		SRR1994874	9302637	0.537482	5	5	1	AACAGAGGGAGAGCAAGUAG	UUUCGCGACUUCCUCUGUUAA	GGAGAACAUUAACAGAGGGA	0	0	1	0	3 cited not expressed	No	fn-011	mb-01011	ax-1001011	ku-01	ss-100111101100
PID0468	Lin2016-hq	Rhsol	Rhi-milR-78		SRR1994877	6052857	0.165211	1	1	1	UUCGCGACUUCCUCUGUUAACUGGGC	ACAUUAACAGAGGGAGAGCAAGUA	GGAGAACAUUAACAGAGGGA	0	0	1	0	3 cited not expressed	No	fn-011	mb-01011	ax-1001101	ku-01	ss-100011101110
PID0468	Lin2016-hq	Rhsol	Rhi-milR-78		SRR1994871	8692379	0.34513	3	2	0.666667	CGGAGAACAUUAACAGAGGGAGAGCAA	GCGACUUCCUCUGUUAACUGGGCUUCCGCG	GGAGAACAUUAACAGAGGGA	0	0	1	0	3 cited not expressed	No	fn-001	mb-01011	ax-1001001	ku-01	ss-100010101100
PID0469	Lin2016-hq	Rhsol	Rhi-milR-53		SRR1994874	9302637	2.36492	22	22	1	CGCGUGAACGACUUCGGAGGAC	CUUUUGAAGCGCUCAUGCUG	CGCGUGAACGACUUCGGAGGA	1	0	3	0	2 cited is not ma	Yes	fn-111	mb-01011	ax-1011011	ku-01	ss-101111111100
PID0469	Lin2016-hq	Rhsol	Rhi-milR-53		SRR1994873	8626632	4.52088	39	39	1	CGCGUGAACGACUUCGGAGGAC	CUUUUGAAGCGCUCAUGCUG	CGCGUGAACGACUUCGGAGGA	2	0	12	0	2 cited is not ma	Yes	fn-111	mb-01011	ax-1011011	ku-01	ss-101111111100
PID0469	Lin2016-hq	Rhsol	Rhi-milR-53		SRR1994872	9065193	3.86092	35	35	1	CGCGUGAACGACUUCGGAGGACGAGUG	AGCGAGAACUGGGCUUUUGAAGCGCUCAUGCUG	CGCGUGAACGACUUCGGAGGA	0	0	8	0	3 cited not expressed	Yes	fn-111	mb-00011	ax-1001001	ku-01	ss-101011101000
PID0469	Lin2016-hq	Rhsol	Rhi-milR-53		SRR1994877	6052857	0.165211	1	1	1	CACGCGUGAACGACUUCGGAGG	UUUGAAGCGCUCAUGCUGUC	CGCGUGAACGACUUCGGAGGA	0	0	1	0	3 cited not expressed	No	fn-011	mb-01011	ax-1011111	ku-01	ss-110111111110
PID0469	Lin2016-hq	Rhsol	Rhi-milR-53		SRR1994875	4270606	0.702476	3	3	1	CGCGUGAACGACUUCGGAGGA	UUUUGAAGCGCUCAUGCUG	CGCGUGAACGACUUCGGAGGA	1	0	1	0	1 cited is ma	No	fn-011	mb-01011	ax-1011011	ku-01	ss-100111111110
PID0469	Lin2016-hq	Rhsol	Rhi-milR-53		SRR1994876	6833927	0.585315	4	4	1	GCGAGAACUGGGCUUUUGAAGCG	UUUUGAAGCGCUCAUGCUG	CGCGUGAACGACUUCGGAGGA	0	0	1	0	3 cited not expressed	No	fn-011	mb-00111	ax-1001011	ku-01	ss-100111101000
PID0469	Lin2016-hq	Rhsol	Rhi-milR-53		SRR1994871	8692379	0.575217	5	5	1	AGCGAGAACUGGGCUUUUG	GAGGACGAGUG	CGCGUGAACGACUUCGGAGGA	0	0	1	0	3 cited not expressed	No	fn-011	mb-00110	ax-1001001	ku-01	ss-100011101000
PID0470	Lin2016-hq	Rhsol	Rhi-milR-23		SRR1994872	9065193	11.3621	103	103	1	CCGCAGCUCUCGUUGGCUUCGUAGCAGC	UGUUGAAACUCGCGACAGCUGUAAAG	AGCUCUCGUUGGCUUCGUAGCAG	0	0	65	0	3 cited not expressed	Yes	fn-111	mb-01011	ax-1001001	ku-01	ss-101011101110
PID0470	Lin2016-hq	Rhsol	Rhi-milR-23		SRR1994873	8626632	7.53481	65	65	1	CCGCAGCUCUCGUUGGCUUCGUAGCAGC	UGUUGAAACUCGCGACAGCUGUAAAG	AGCUCUCGUUGGCUUCGUAGCAG	0	0	24	0	3 cited not expressed	Yes	fn-111	mb-01011	ax-1001001	ku-01	ss-101011101110
PID0470	Lin2016-hq	Rhsol	Rhi-milR-23		SRR1994874	9302637	1.82744	17	17	1	CCGCAGCUCUCGUUGGCUUCGUAGCAGC	UGUUGAAACUCGCGACAGCUGUAAAG	AGCUCUCGUUGGCUUCGUAGCAG	0	0	4	0	3 cited not expressed	Yes	fn-111	mb-01011	ax-1001001	ku-01	ss-101011101100
PID0470	Lin2016-hq	Rhsol	Rhi-milR-23		SRR1994876	6833927	2.0486	14	14	1	GCAGCUCUCGUUGGCUUCGUAGCAGC	UGUUGAAACUCGCGACAGCUGUAA	AGCUCUCGUUGGCUUCGUAGCAG	1	0	5	0	2 cited is not ma	Yes	fn-111	mb-01011	ax-1011001	ku-01	ss-101011101110
PID0470	Lin2016-hq	Rhsol	Rhi-milR-23		SRR1994875	4270606	2.80991	12	12	1	GCAGCUCUCGUUGGCUUCGUAGCAGC	UGUUGAAACUCGCGACAGCUGUAA	AGCUCUCGUUGGCUUCGUAGCAG	0	0	4	0	3 cited not expressed	Yes	fn-111	mb-01111	ax-1011001	ku-01	ss-101011101100
PID0470	Lin2016-hq	Rhsol	Rhi-milR-23		SRR1994877	6052857	1.15648	7	7	1	CAGCUCUCGUUGGCUUCGUAGCAG	GUUGAAACUCGCGACAGCUGUA	AGCUCUCGUUGGCUUCGUAGCAG	0	0	3	0	3 cited not expressed	Yes	fn-111	mb-01111	ax-1011011	ku-01	ss-101111111110
PID0470	Lin2016-hq	Rhsol	Rhi-milR-23		SRR1994871	8692379	1.03539	9	9	1	CGCAGCUCUCGUUGGCUUCGUAGCAGC	UGUUGAAACUCGCGACAGCUGUAAA	AGCUCUCGUUGGCUUCGUAGCAG	0	0	3	0	3 cited not expressed	No	fn-011	mb-01011	ax-1011001	ku-01	ss-101011101100
PID0472	Lin2016-hq	Rhsol	Rhi-milR-109		SRR1994877	6052857	3.46944	21	20	0.952381	UUAGUAGCUGUUCUCUUAGGGGC	GCCUGGCCAGAGGGGAGUAAUGGAAU	UAGUAGCUGUUCUCUUAGGGGC	1	0	11	0	2 cited is not ma	Yes	fn-111	mb-01011	ax-1001111	ku-01	ss-111111101110
PID0472	Lin2016-hq	Rhsol	Rhi-milR-109		SRR1994872	9065193	1.21343	11	9	0.818182	UUAGUAGCUGUUCUCUUAGGGGC	GCCUGGCCAGAGGGGAGUAAUGGAAU	UAGUAGCUGUUCUCUUAGGGGC	0	0	6	0	3 cited not expressed	Yes	fn-111	mb-01011	ax-1001011	ku-01	ss-111111101110
PID0472	Lin2016-hq	Rhsol	Rhi-milR-109		SRR1994876	6833927	2.63392	18	15	0.833333	UUAGUAGCUGUUCUCUUAGGGGC	GCCUGGCCAGAGGGGAGUAAUGGAAU	UAGUAGCUGUUCUCUUAGGGGC	0	0	9	0	3 cited not expressed	Yes	fn-111	mb-01011	ax-1001011	ku-01	ss-111111101110
PID0472	Lin2016-hq	Rhsol	Rhi-milR-109		SRR1994874	9302637	1.61245	15	13	0.866667	UUAGUAGCUGUUCUCUUAGGGGC	GCCUGGCCAGAGGGGAGUAAUGGAAU	UAGUAGCUGUUCUCUUAGGGGC	4	0	6	0	2 cited is not ma	Yes	fn-111	mb-01011	ax-1001011	ku-01	ss-111111101110
PID0472	Lin2016-hq	Rhsol	Rhi-milR-109		SRR1994873	8626632	2.3184	20	16	0.8	UUAGUAGCUGUUCUCUUAGGGGC	GCCUGGCCAGAGGGGAGUAAUGGAAU	UAGUAGCUGUUCUCUUAGGGGC	2	0	8	0	2 cited is not ma	No	fn-101	mb-01011	ax-1001011	ku-01	ss-111110101110
PID0472	Lin2016-hq	Rhsol	Rhi-milR-109		SRR1994871	8692379	1.15043	10	8	0.8	UUAGUAGCUGUUCUCUUAGGGGC	GCCUGGCCAGAGGGGAGUAAUGGAAU	UAGUAGCUGUUCUCUUAGGGGC	0	0	2	0	3 cited not expressed	No	fn-001	mb-01011	ax-1001011	ku-01	ss-111110101100
PID0472	Lin2016-hq	Rhsol	Rhi-milR-109		SRR1994875	4270606	0.234159	1	0	0	UAGUAGCUGUUCUCUUAGGGGC	GCCUGGCCAGAGGGGAGUAAUGGAA	UAGUAGCUGUUCUCUUAGGGGC	0	0	0	0	3 cited not expressed	No	fn-001	mb-01011	ax-1001011	ku-01	ss-100111001100
PID0474	Lin2016-hq	Rhsol	Rhi-milR-38		SRR1994872	9065193	2.09593	19	18	0.947368	AUUGAGGCCAUCUGAACAAGGG	CUUGCAUGCAGUGGCCUGUUUGG	AUUGAGGCCAUCUGAACAAGG	1	1	7	0	2 cited is not ma	Yes	fn-111	mb-01011	ax-1001011	ku-01	ss-111111101110
PID0474	Lin2016-hq	Rhsol	Rhi-milR-38		SRR1994876	6833927	3.95088	27	26	0.962963	AUUGAGGCCAUCUGAACAAGGG	CUUGCAUGCAGUGGCCUGUUUGG	AUUGAGGCCAUCUGAACAAGG	0	1	10	0	3 cited not expressed	Yes	fn-111	mb-01011	ax-1001011	ku-01	ss-111111101110
PID0474	Lin2016-hq	Rhsol	Rhi-milR-38		SRR1994871	8692379	9.20346	80	77	0.9625	AUUGAGGCCAUCUGAACAAGGG	CUUGCAUGCAGUGGCCUGUUUGG	AUUGAGGCCAUCUGAACAAGG	1	2	25	0	2 cited is not ma	Yes	fn-111	mb-01011	ax-1001011	ku-01	ss-111111101110
PID0474	Lin2016-hq	Rhsol	Rhi-milR-38		SRR1994875	4270606	2.80991	12	8	0.666667	AUUGAGGCCAUCUGAACAAGGG	CUUGCAUGCAGUGGCCUGUUUGG	AUUGAGGCCAUCUGAACAAGG	0	0	2	0	3 cited not expressed	No	fn-101	mb-01011	ax-1001011	ku-01	ss-111110101100
PID0474	Lin2016-hq	Rhsol	Rhi-milR-38		SRR1994874	9302637	1.93494	18	16	0.888889	UUGCAUGCAGUGGCCUGUUUGG	AUUGAGGCCAUCUGAACAAGG	AUUGAGGCCAUCUGAACAAGG	0	5	5	0	3 cited not expressed	Yes	fn-111	mb-01011	ax-1001011	ku-01	ss-111111101110
PID0474	Lin2016-hq	Rhsol	Rhi-milR-38		SRR1994877	6052857	2.31296	14	14	1	CAUUGAGGCCAUCUGAACAAGGG	CUUGCAUGCAGUGGCCUGUUUGGC	AUUGAGGCCAUCUGAACAAGG	1	0	5	0	2 cited is not ma	Yes	fn-111	mb-01011	ax-1001011	ku-01	ss-111111101110
PID0474	Lin2016-hq	Rhsol	Rhi-milR-38		SRR1994873	8626632	1.62288	14	11	0.785714	CAUUGAGGCCAUCUGAACAAGGG	CUUGCAUGCAGUGGCCUGUUUGGC	AUUGAGGCCAUCUGAACAAGG	0	1	4	0	3 cited not expressed	No	fn-101	mb-01011	ax-1001011	ku-01	ss-111110101100
PID0475	Lin2016-hq	Rhsol	Rhi-milR-159		SRR1994874	9302637	3.0099	28	19	0.678571	UUUAGUAGUUAGAUGUUGUAGGG	UACAGCAUCUUGUCACCAUAG	UUAGUAGUUAGAUGUUGUAGG	0	0	5	0	3 cited not expressed	No	fn-101	mb-01110	ax-1011011	ku-01	ss-111110101100
PID0475	Lin2016-hq	Rhsol	Rhi-milR-159		SRR1994876	6833927	2.78025	19	17	0.894737	UUUAGUAGUUAGAUGUUGUAGGG	UACAGCAUCUUGUCACCAUAG	UUAGUAGUUAGAUGUUGUAGG	0	0	2	0	3 cited not expressed	Yes	fn-111	mb-01010	ax-1001011	ku-01	ss-111111101100
PID0475	Lin2016-hq	Rhsol	Rhi-milR-159		SRR1994877	6052857	4.79113	29	17	0.586207	UUUAGUAGUUAGAUGUUGUAGGG	UACAGCAUCUUGUCACCAUAG	UUAGUAGUUAGAUGUUGUAGG	0	0	3	0	3 cited not expressed	No	fn-101	mb-01010	ax-1011011	ku-01	ss-111110101100
PID0475	Lin2016-hq	Rhsol	Rhi-milR-159		SRR1994873	8626632	1.50696	13	9	0.692308	UAGUUAGAUGUUGUAGGGUGGU	CGCCUUACAGCAUCUUGUCACC	UUAGUAGUUAGAUGUUGUAGG	0	0	2	0	3 cited not expressed	No	fn-001	mb-01111	ax-1011011	ku-01	ss-111110101100
PID0475	Lin2016-hq	Rhsol	Rhi-milR-159		SRR1994872	9065193	1.21343	11	8	0.727273	UUAGUAGUUAGAUGUUGUAGGGU	CUUACAGCAUCUUGUCACCAUAG	UUAGUAGUUAGAUGUUGUAGG	0	0	2	0	3 cited not expressed	No	fn-001	mb-01111	ax-1001011	ku-01	ss-111110101100
PID0475	Lin2016-hq	Rhsol	Rhi-milR-159		SRR1994871	8692379	3.91147	34	27	0.794118	UUUAGUAGUUAGAUGUUGUAGGGU	UACAGCAUCUUGUCACCAUAG	UUAGUAGUUAGAUGUUGUAGG	1	0	4	0	2 cited is not ma	No	fn-101	mb-01010	ax-1011011	ku-01	ss-111110101100
PID0475	Lin2016-hq	Rhsol	Rhi-milR-159		SRR1994875	4270606	1.40495	6	3	0.5	UUUAGUAGUUAGAUGUUGUAGGGU	UACAGCAUCUUGUCACCAUAG	UUAGUAGUUAGAUGUUGUAGG	0	0	1	0	3 cited not expressed	No	fn-001	mb-01010	ax-1001011	ku-01	ss-110110001100
PID0476	Lin2016-hq	Rhsol	Rhi-milR-74		SRR1994872	9065193	17.0984	155	155	1	UGCCGAGGCGAAGGCUGACACCCGUU	UGGGUGUUGACCUCGCCUUGCCAUG	GCCGAGGCGAAGGCUGACAC	0	0	54	0	3 cited not expressed	Yes	fn-111	mb-01111	ax-1011001	ku-01	ss-101011101110
PID0476	Lin2016-hq	Rhsol	Rhi-milR-74		SRR1994876	6833927	3.51189	24	24	1	UGCCGAGGCGAAGGCUGACACCCGUU	UGGGUGUUGACCUCGCCUUGCCAUG	GCCGAGGCGAAGGCUGACAC	1	0	13	0	2 cited is not ma	Yes	fn-111	mb-01011	ax-1011101	ku-01	ss-101011101110
PID0476	Lin2016-hq	Rhsol	Rhi-milR-74		SRR1994877	6052857	18.3384	111	111	1	UGCCGAGGCGAAGGCUGACACCCGUUG	GUGGGUGUUGACCUCGCCUUGCCAUG	GCCGAGGCGAAGGCUGACAC	0	0	68	0	3 cited not expressed	Yes	fn-111	mb-01011	ax-1011101	ku-01	ss-101011101110
PID0476	Lin2016-hq	Rhsol	Rhi-milR-74		SRR1994875	4270606	4.44902	19	19	1	UGCCGAGGCGAAGGCUGACACCCGUU	UGGGUGUUGACCUCGCCUUGCCAUG	GCCGAGGCGAAGGCUGACAC	0	0	7	0	3 cited not expressed	Yes	fn-111	mb-01011	ax-1011001	ku-01	ss-101011101110
PID0476	Lin2016-hq	Rhsol	Rhi-milR-74		SRR1994874	9302637	11.8246	110	109	0.990909	UGCCGAGGCGAAGGCUGACACCCGUUG	GUGGGUGUUGACCUCGCCUUGCCAUG	GCCGAGGCGAAGGCUGACAC	0	0	38	0	3 cited not expressed	Yes	fn-111	mb-01011	ax-1011001	ku-01	ss-101011101110
PID0476	Lin2016-hq	Rhsol	Rhi-milR-74		SRR1994873	8626632	14.9537	129	128	0.992248	UGCCGAGGCGAAGGCUGACACCCGUUG	GUGGGUGUUGACCUCGCCUUGCCAUG	GCCGAGGCGAAGGCUGACAC	0	0	36	0	3 cited not expressed	Yes	fn-111	mb-01011	ax-1011001	ku-01	ss-101011101100
PID0476	Lin2016-hq	Rhsol	Rhi-milR-74		SRR1994871	8692379	3.68139	32	32	1	UGCCGAGGCGAAGGCUGACAC	GUUGACCUCGCCUUGCCAUG	GCCGAGGCGAAGGCUGACAC	1	0	11	0	2 cited is not ma	Yes	fn-111	mb-01011	ax-1011011	ku-01	ss-101111111110
PID0477	Lin2016-hq	Rhsol	Rhi-milR-120		SRR1994872	9065193	3.19905	29	29	1	UCGAGUCGAGGAUUGUAGGGCCUG	GGAGUUGCAGACCAUCAUGAAGGGU	UCGAGUCGAGGAUUGUAGGGCC	0	0	5	0	3 cited not expressed	Yes	fn-111	mb-01011	ax-1001011	ku-01	ss-101111101100
PID0477	Lin2016-hq	Rhsol	Rhi-milR-120		SRR1994875	4270606	0.702476	3	3	1	UCGAGUCGAGGAUUGUAGGGCCUG	GGAGUUGCAGACCAUCAUGAAGGGU	UCGAGUCGAGGAUUGUAGGGCC	0	0	1	0	3 cited not expressed	No	fn-011	mb-01011	ax-1001011	ku-01	ss-100111101110
PID0477	Lin2016-hq	Rhsol	Rhi-milR-120		SRR1994873	8626632	1.62288	14	14	1	CGAGUCGAGGAUUGUAGGGC	GUUGCAGACCAUCAUGAAGGG	UCGAGUCGAGGAUUGUAGGGCC	0	0	3	0	3 cited not expressed	Yes	fn-111	mb-01011	ax-1001011	ku-01	ss-101111101100
PID0477	Lin2016-hq	Rhsol	Rhi-milR-120		SRR1994877	6052857	0.330422	2	2	1	UGAUCGAGUCGAGGAUUGUAGGG	UUGCAGACCAUCAUGAAGGGUAU	UCGAGUCGAGGAUUGUAGGGCC	0	0	1	0	3 cited not expressed	No	fn-011	mb-01011	ax-1001011	ku-01	ss-110111101100
PID0477	Lin2016-hq	Rhsol	Rhi-milR-120		SRR1994876	6833927	0.731644	5	5	1	AUCGAGUCGAGGAUUGUAGGGCCUG	GGAGUUGCAGACCAUCAUGAAGGGUA	UCGAGUCGAGGAUUGUAGGGCC	0	0	2	0	3 cited not expressed	No	fn-011	mb-01011	ax-1001001	ku-01	ss-101011101100
PID0477	Lin2016-hq	Rhsol	Rhi-milR-120		SRR1994871	8692379	0.69026	6	6	1	AUCGAGUCGAGGAUUGUAGGGCCUGU	AGGAGUUGCAGACCAUCAUGAAGGGUA	UCGAGUCGAGGAUUGUAGGGCC	0	0	2	0	3 cited not expressed	No	fn-011	mb-01011	ax-1001001	ku-01	ss-101011101100
PID0477	Lin2016-hq	Rhsol	Rhi-milR-120		SRR1994874	9302637	1.18246	11	11	1	CGAGUCGAGGAUUGUAGGGCCUGUAAAG	AGUUGCAGACCAUCAUGAAGGGU	UCGAGUCGAGGAUUGUAGGGCC	0	0	3	0	3 cited not expressed	No	fn-011	mb-00010	ax-1001001	ku-01	ss-101011101100
PID0479	Lin2016-hq	Rhsol	Rhi-milR-129		SRR1994871	8692379	12.7698	111	111	1	GUGAGGCUAUGGACAUGGACGAUGAC	GUCUAAUCCGAAUCCUCAAC	UGAGGCUAUGGACAUGGACGA	0	0	51	0	3 cited not expressed	Yes	fn-111	mb-00011	ax-1011001	ku-01	ss-101011101110
PID0479	Lin2016-hq	Rhsol	Rhi-milR-129		SRR1994874	9302637	7.63224	71	69	0.971831	GUGAGGCUAUGGACAUGGACGAUGAC	GUCUAAUCCGAAUCCUCAAC	UGAGGCUAUGGACAUGGACGA	0	0	28	0	3 cited not expressed	Yes	fn-111	mb-00111	ax-1011001	ku-01	ss-101011101100
PID0479	Lin2016-hq	Rhsol	Rhi-milR-129		SRR1994877	6052857	12.3908	75	75	1	GUGAGGCUAUGGACAUGGACGAUGAC	GUCUAAUCCGAAUCCUCAAC	UGAGGCUAUGGACAUGGACGA	0	0	34	0	3 cited not expressed	Yes	fn-111	mb-00011	ax-1011001	ku-01	ss-101011101110
PID0479	Lin2016-hq	Rhsol	Rhi-milR-129		SRR1994876	6833927	6.29214	43	41	0.953488	GUGAGGCUAUGGACAUGGACGAUGAC	GUCUAAUCCGAAUCCUCAAC	UGAGGCUAUGGACAUGGACGA	0	0	19	0	3 cited not expressed	Yes	fn-111	mb-00011	ax-1011001	ku-01	ss-101011101100
PID0479	Lin2016-hq	Rhsol	Rhi-milR-129		SRR1994875	4270606	5.85397	25	17	0.68	GUGAGGCUAUGGACAUGGACGAUGAC	GUCUAAUCCGAAUCCUCAAC	UGAGGCUAUGGACAUGGACGA	0	0	5	0	3 cited not expressed	No	fn-101	mb-00011	ax-1011001	ku-01	ss-101010101100
PID0479	Lin2016-hq	Rhsol	Rhi-milR-129		SRR1994873	8626632	26.7775	231	77	0.333333	GUGAGGCUAUGGACAUGGACGAUGAC	GUCUAAUCCGAAUCCUCAAC	UGAGGCUAUGGACAUGGACGA	0	0	25	0	3 cited not expressed	No	fn-101	mb-00111	ax-1011001	ku-01	ss-101010001100
PID0479	Lin2016-hq	Rhsol	Rhi-milR-129		SRR1994872	9065193	9.1559	83	68	0.819277	GUGAGGCUAUGGACAUGGACGAUG	GUCUAAUCCGAAUCCUCAAC	UGAGGCUAUGGACAUGGACGA	0	0	19	0	3 cited not expressed	Yes	fn-111	mb-01111	ax-1011011	ku-01	ss-101111101100
PID0480	Lin2016-hq	Rhsol	Rhi-milR-71		SRR1994871	8692379	2.18582	19	16	0.842105	AUGGAUCCGUAGGUGUUGGCGC	GCCAAGGUGCUGUGGAUCCAUAG	GAUGGAUCCGUAGGUGUUGGCG	0	0	6	0	3 cited not expressed	Yes	fn-111	mb-01111	ax-1011011	ku-01	ss-111111111110
PID0480	Lin2016-hq	Rhsol	Rhi-milR-71		SRR1994877	6052857	1.32169	8	7	0.875	UGGAUCCGUAGGUGUUGGCGC	GCCAAGGUGCUGUGGAUCCAUA	GAUGGAUCCGUAGGUGUUGGCG	0	0	4	0	3 cited not expressed	Yes	fn-111	mb-01011	ax-1011011	ku-01	ss-111111111110
PID0480	Lin2016-hq	Rhsol	Rhi-milR-71		SRR1994873	8626632	0.34776	3	3	1	AUGGAUCCGUAGGUGUUGGCGC	GCCAAGGUGCUGUGGAUCCAUAG	GAUGGAUCCGUAGGUGUUGGCG	0	0	1	0	3 cited not expressed	No	fn-011	mb-01011	ax-1011011	ku-01	ss-110111111110
PID0480	Lin2016-hq	Rhsol	Rhi-milR-71		SRR1994872	9065193	0.110312	1	1	1	GGGAUGGAUCCGUAGGUGUUGG	AAGGUGCUGUGGAUCCAUAGCC	GAUGGAUCCGUAGGUGUUGGCG	0	0	1	0	3 cited not expressed	No	fn-011	mb-01011	ax-1011111	ku-01	ss-110111111110
PID0480	Lin2016-hq	Rhsol	Rhi-milR-71		SRR1994876	6833927	0.438986	3	3	1	GAUGGAUCCGUAGGUGUUGGCGC	GCCAAGGUGCUGUGGAUCCAUAGC	GAUGGAUCCGUAGGUGUUGGCG	0	0	1	0	3 cited not expressed	No	fn-011	mb-01011	ax-1011111	ku-01	ss-110111111110
PID0480	Lin2016-hq	Rhsol	Rhi-milR-71		SRR1994875	4270606	0.234159	1	1	1	UGGAUCCGUAGGUGUUGGC	CAAGGUGCUGUGGAUCCAUA	GAUGGAUCCGUAGGUGUUGGCG	0	0	1	0	3 cited not expressed	No	fn-011	mb-01011	ax-1011101	ku-01	ss-100011111110
PID0480	Lin2016-hq	Rhsol	Rhi-milR-71		SRR1994874	9302637	0	0	0	NA	GAUGGAUCCGUAGGUGUUGGCG	CCAAGGUGCUGUGGAUCCAUAGC	GAUGGAUCCGUAGGUGUUGGCG	0	0	0	0	4 locus not expressed	No	fn-001	mb-01011	ax-1011011	ku-01	ss-000110011100
PID0482	Lin2016-hq	Rhsol	Rhi-milR-33		SRR1994873	8626632	80.7963	697	697	1	GGGCGUAUGGUGUAG	GCCAAUACAUAUUACUCU	AGGGGCGUAUGGUGUAGUGG	13	0	222	0	2 cited is not ma	Yes	fn-111	mb-01011	ax-1001001	ku-11	ss-101011101100
PID0482	Lin2016-hq	Rhsol	Rhi-milR-33		SRR1994874	9302637	75.57	703	703	1	GGGCGUAUGGUGUAGUGGUAUCA	AUGGCCAAUACAUAUUACUCUAGC	AGGGGCGUAUGGUGUAGUGG	12	0	133	0	2 cited is not ma	Yes	fn-111	mb-00011	ax-1001011	ku-01	ss-101111101100
PID0482	Lin2016-hq	Rhsol	Rhi-milR-33		SRR1994877	6052857	32.051	194	194	1	GGGCGUAUGGUGUAGUGGUAUCA	AUGGCCAAUACAUAUUACUCUAGC	AGGGGCGUAUGGUGUAGUGG	10	0	35	0	2 cited is not ma	Yes	fn-111	mb-00011	ax-1001011	ku-01	ss-101111101100
PID0482	Lin2016-hq	Rhsol	Rhi-milR-33		SRR1994875	4270606	20.8401	89	89	1	GGGCGUAUGGUGUAG	GCCAAUACAUAUUACUCU	AGGGGCGUAUGGUGUAGUGG	0	0	26	0	3 cited not expressed	Yes	fn-111	mb-01011	ax-1001001	ku-01	ss-101011101100
PID0482	Lin2016-hq	Rhsol	Rhi-milR-33		SRR1994876	6833927	43.0207	294	294	1	GGGCGUAUGGUGUAGUGGUAUC	AGCCAUGGCCAAUACAUAUUACUCU	AGGGGCGUAUGGUGUAGUGG	0	0	54	0	3 cited not expressed	Yes	fn-111	mb-01011	ax-1001011	ku-01	ss-101111101100
PID0482	Lin2016-hq	Rhsol	Rhi-milR-33		SRR1994872	9065193	40.1536	364	364	1	GGGCGUAUGGUGUAGUGG	AUGGCCAAUACAUAUUACUCU	AGGGGCGUAUGGUGUAGUGG	8	0	88	0	2 cited is not ma	Yes	fn-111	mb-01011	ax-1001001	ku-01	ss-101011101100
PID0482	Lin2016-hq	Rhsol	Rhi-milR-33		SRR1994871	8692379	57.6367	501	501	1	GGGCGUAUGGUGUAGUGGU	CAUGGCCAAUACAUAUUACUCU	AGGGGCGUAUGGUGUAGUGG	3	0	142	0	2 cited is not ma	Yes	fn-111	mb-01011	ax-1001001	ku-01	ss-101011101100
PID0483	Lin2016-hq	Rhsol	Rhi-milR-118		SRR1994873	8626632	1.97064	17	16	0.941176	UUCAGGAAGCAUGGAUUGGGG	CCAGAUUGUUUCCCAGGACA	UCAGGAAGCAUGGAUUGGGG	1	0	7	0	2 cited is not ma	Yes	fn-111	mb-01111	ax-1001011	ku-01	ss-111111101110
PID0483	Lin2016-hq	Rhsol	Rhi-milR-118		SRR1994874	9302637	3.33239	31	31	1	UUCAGGAAGCAUGGAUUGGGG	CCAGAUUGUUUCCCAGGACA	UCAGGAAGCAUGGAUUGGGG	2	0	6	0	2 cited is not ma	Yes	fn-111	mb-01011	ax-1001011	ku-01	ss-111111101110
PID0483	Lin2016-hq	Rhsol	Rhi-milR-118		SRR1994877	6052857	4.13028	25	25	1	UUCAGGAAGCAUGGAUUGGGG	CCAGAUUGUUUCCCAGGACA	UCAGGAAGCAUGGAUUGGGG	0	0	9	0	3 cited not expressed	Yes	fn-111	mb-01111	ax-1001011	ku-01	ss-111111101100
PID0483	Lin2016-hq	Rhsol	Rhi-milR-118		SRR1994871	8692379	8.97338	78	76	0.974359	UUCAGGAAGCAUGGAUUGGGG	CCAGAUUGUUUCCCAGGACA	UCAGGAAGCAUGGAUUGGGG	4	0	7	0	2 cited is not ma	Yes	fn-111	mb-01011	ax-1001011	ku-01	ss-111111101100
PID0483	Lin2016-hq	Rhsol	Rhi-milR-118		SRR1994872	9065193	1.54437	14	14	1	UUCAGGAAGCAUGGAUUGGGG	CCAGAUUGUUUCCCAGGACA	UCAGGAAGCAUGGAUUGGGG	0	0	4	0	3 cited not expressed	Yes	fn-111	mb-01011	ax-1001011	ku-01	ss-111111101100
PID0483	Lin2016-hq	Rhsol	Rhi-milR-118		SRR1994875	4270606	5.61981	24	23	0.958333	UUCAGGAAGCAUGGAUUGGGGG	ACCAGAUUGUUUCCCAGGACA	UCAGGAAGCAUGGAUUGGGG	0	0	4	0	3 cited not expressed	Yes	fn-111	mb-01111	ax-1001011	ku-01	ss-111111101100
PID0483	Lin2016-hq	Rhsol	Rhi-milR-118		SRR1994876	6833927	3.80455	26	26	1	UUCAGGAAGCAUGGAUUGGGGG	ACCAGAUUGUUUCCCAGGACA	UCAGGAAGCAUGGAUUGGGG	0	0	5	0	3 cited not expressed	Yes	fn-111	mb-01011	ax-1001011	ku-01	ss-111111101100
PID0485	Lin2016-hq	Rhsol	Rhi-milR-59		SRR1994873	8626632	4.0572	35	13	0.371429	UACCAAGGACAGAUUGUAGUGC	ACUCCAAAUCUUCCAUGAUAGC	CUACCAAGGACAGAUUGUAGUGC	0	0	5	0	3 cited not expressed	No	fn-101	mb-01111	ax-1011011	ku-01	ss-111110001100
PID0485	Lin2016-hq	Rhsol	Rhi-milR-59		SRR1994877	6052857	10.7387	65	14	0.215385	UACCAAGGACAGAUUGUAGUGC	ACUCCAAAUCUUCCAUGAUAGC	CUACCAAGGACAGAUUGUAGUGC	1	0	2	0	2 cited is not ma	No	fn-101	mb-01111	ax-1011011	ku-01	ss-111110001100
PID0485	Lin2016-hq	Rhsol	Rhi-milR-59		SRR1994871	8692379	1.95574	17	7	0.411765	UACCAAGGACAGAUUGUAGUGC	ACUCCAAAUCUUCCAUGAUAGC	CUACCAAGGACAGAUUGUAGUGC	0	0	2	0	3 cited not expressed	No	fn-001	mb-01011	ax-1011011	ku-01	ss-111110001100
PID0485	Lin2016-hq	Rhsol	Rhi-milR-59		SRR1994874	9302637	4.29986	40	12	0.3	UACCAAGGACAGAUUGUAGUGCC	UACUCCAAAUCUUCCAUGAUAGC	CUACCAAGGACAGAUUGUAGUGC	0	0	2	0	3 cited not expressed	No	fn-001	mb-01111	ax-1001011	ku-01	ss-111110001100
PID0485	Lin2016-hq	Rhsol	Rhi-milR-59		SRR1994872	9065193	5.18467	47	10	0.212766	UACCAAGGACAGAUUGUAGUGC	ACUCCAAAUCUUCCAUGAUAGC	CUACCAAGGACAGAUUGUAGUGC	0	0	4	0	3 cited not expressed	No	fn-001	mb-01011	ax-1011011	ku-01	ss-101110001100
PID0485	Lin2016-hq	Rhsol	Rhi-milR-59		SRR1994876	6833927	2.78025	19	4	0.210526	UACCAAGGACAGAUUGUAGUGC	ACUCCAAAUCUUCCAUGAUAGC	CUACCAAGGACAGAUUGUAGUGC	0	0	3	0	3 cited not expressed	No	fn-001	mb-01011	ax-1011011	ku-01	ss-101110001100
PID0485	Lin2016-hq	Rhsol	Rhi-milR-59		SRR1994875	4270606	1.17079	5	2	0.4	CAGACCUACUCCAAAUCUUCCA	GACAGAUUGUAGUGCCCAAUGUU	CUACCAAGGACAGAUUGUAGUGC	0	0	1	0	3 cited not expressed	No	fn-001	mb-01111	ax-1001011	ku-01	ss-110110001100
PID0486	Lin2016-hq	Rhsol	Rhi-milR-28		SRR1994872	9065193	0.992808	9	8	0.888889	AGGAGAUGAUCUACAGGACUAGGG	UUAUUUUGAUGAGACUACUUA	AGGAGAUGAUCUACAGGACUAGG	1	0	6	0	2 cited is not ma	Yes	fn-111	mb-01011	ax-1001111	ku-01	ss-111111101110
PID0486	Lin2016-hq	Rhsol	Rhi-milR-28		SRR1994875	4270606	1.40495	6	6	1	AGGAGAUGAUCUACAGGACUAGGG	UUAUUUUGAUGAGACUACUUA	AGGAGAUGAUCUACAGGACUAGG	0	0	5	0	3 cited not expressed	Yes	fn-111	mb-01011	ax-1001111	ku-01	ss-111111101110
PID0486	Lin2016-hq	Rhsol	Rhi-milR-28		SRR1994876	6833927	2.78025	19	19	1	AGGAGAUGAUCUACAGGACUAGGG	UUAUUUUGAUGAGACUACUUA	AGGAGAUGAUCUACAGGACUAGG	0	0	12	0	3 cited not expressed	Yes	fn-111	mb-01011	ax-1001011	ku-01	ss-111111101110
PID0486	Lin2016-hq	Rhsol	Rhi-milR-28		SRR1994873	8626632	1.04328	9	8	0.888889	AGGAGAUGAUCUACAGGACUAGGG	UUAUUUUGAUGAGACUACUUA	AGGAGAUGAUCUACAGGACUAGG	0	0	5	0	3 cited not expressed	Yes	fn-111	mb-01011	ax-1001011	ku-01	ss-111111101110
PID0486	Lin2016-hq	Rhsol	Rhi-milR-28		SRR1994871	8692379	4.2566	37	36	0.972973	AGGAGAUGAUCUACAGGACUAGGG	UUAUUUUGAUGAGACUACUUA	AGGAGAUGAUCUACAGGACUAGG	0	0	20	0	3 cited not expressed	Yes	fn-111	mb-01011	ax-1001011	ku-01	ss-111111101110
PID0486	Lin2016-hq	Rhsol	Rhi-milR-28		SRR1994877	6052857	1.81732	11	10	0.909091	AGGAGAUGAUCUACAGGACUAGGG	UUAUUUUGAUGAGACUACUUA	AGGAGAUGAUCUACAGGACUAGG	0	0	7	0	3 cited not expressed	Yes	fn-111	mb-01011	ax-1001011	ku-01	ss-111111101110
PID0486	Lin2016-hq	Rhsol	Rhi-milR-28		SRR1994874	9302637	2.36492	22	22	1	AGGAGAUGAUCUACAGGACUAGGG	UUAUUUUGAUGAGACUACUUA	AGGAGAUGAUCUACAGGACUAGG	0	0	8	0	3 cited not expressed	Yes	fn-111	mb-01011	ax-1001011	ku-01	ss-111111101100
PID0487	Lin2016-hq	Rhsol	Rhi-milR-90		SRR1994874	9302637	42.0311	391	391	1	GGUCGUUUGCCAGAGUGGUUAAUGGGU	GUAUAUAAUGGUGGUGAUUGACAGC	GUCGUUUGCCAGAGUGGUUAAUGG	0	0	287	0	3 cited not expressed	Yes	fn-111	mb-01011	ax-1001101	ku-11	ss-101011101110
PID0487	Lin2016-hq	Rhsol	Rhi-milR-90		SRR1994872	9065193	56.4798	512	511	0.998047	GGUCGUUUGCCAGAGUGGUUAAUGGGU	GUAUAUAAUGGUGGUGAUUGACAGC	GUCGUUUGCCAGAGUGGUUAAUGG	3	0	350	0	2 cited is not ma	Yes	fn-111	mb-01011	ax-1001001	ku-11	ss-101011101110
PID0487	Lin2016-hq	Rhsol	Rhi-milR-90		SRR1994873	8626632	116.616	1006	1005	0.999006	GGUCGUUUGCCAGAGUGGUUAAUGGGU	GUAUAUAAUGGUGGUGAUUGACAGC	GUCGUUUGCCAGAGUGGUUAAUGG	2	0	628	0	2 cited is not ma	Yes	fn-111	mb-01011	ax-1001001	ku-11	ss-101011101110
PID0487	Lin2016-hq	Rhsol	Rhi-milR-90		SRR1994871	8692379	16.2211	141	140	0.992908	GGUCGUUUGCCAGAGUGGUUAAUGGGU	GUAUAUAAUGGUGGUGAUUGACAGC	GUCGUUUGCCAGAGUGGUUAAUGG	0	0	97	0	3 cited not expressed	Yes	fn-111	mb-01011	ax-1001001	ku-01	ss-101011101110
PID0487	Lin2016-hq	Rhsol	Rhi-milR-90		SRR1994877	6052857	7.76493	47	47	1	GGUCGUUUGCCAGAGUGGUUAAUGGGU	GUAUAUAAUGGUGGUGAUUGACAGC	GUCGUUUGCCAGAGUGGUUAAUGG	2	0	24	0	2 cited is not ma	Yes	fn-111	mb-01011	ax-1001001	ku-01	ss-101011101110
PID0487	Lin2016-hq	Rhsol	Rhi-milR-90		SRR1994876	6833927	0.292658	2	2	1	UGGUCGUUUGCCAGAGUGGUUAAUGGGUGC	UGUAUAUAAUGGUGGUGAUUGACAGCU	GUCGUUUGCCAGAGUGGUUAAUGG	0	0	1	0	3 cited not expressed	No	fn-011	mb-01011	ax-1001001	ku-01	ss-100011101100
PID0487	Lin2016-hq	Rhsol	Rhi-milR-90		SRR1994875	4270606	0	0	0	NA	GUCGUUUGCCAGAGUGGUUAAUGG	AUAUAAUGGUGGUGAUUGACAG	GUCGUUUGCCAGAGUGGUUAAUGG	0	0	0	0	4 locus not expressed	No	fn-001	mb-01011	ax-1001011	ku-01	ss-000110001100
PID0488	Lin2016-hq	Rhsol	Rhi-milR-108		SRR1994876	6833927	2.19493	15	14	0.933333	UAGGUGUAGCACACAGCAAAGGC	CUGCUUGCAGUCUGUGCCUGGGCAGGCC	UAGGUGUAGCACACAGCAAAGG	0	0	7	0	3 cited not expressed	Yes	fn-111	mb-01111	ax-1001011	ku-01	ss-111111101010
PID0488	Lin2016-hq	Rhsol	Rhi-milR-108		SRR1994873	8626632	2.55024	22	18	0.818182	UAGGUGUAGCACACAGCAAAGGC	CUGCUUGCAGUCUGUGCCUGGGCAGGCC	UAGGUGUAGCACACAGCAAAGG	0	0	10	0	3 cited not expressed	Yes	fn-111	mb-01111	ax-1001011	ku-01	ss-111111101010
PID0488	Lin2016-hq	Rhsol	Rhi-milR-108		SRR1994872	9065193	1.8753	17	16	0.941176	UAGGUGUAGCACACAGCAAAGGC	CUGCUUGCAGUCUGUGCCUGGGCAGGCC	UAGGUGUAGCACACAGCAAAGG	0	0	6	0	3 cited not expressed	Yes	fn-111	mb-01011	ax-1001011	ku-01	ss-111111101010
PID0488	Lin2016-hq	Rhsol	Rhi-milR-108		SRR1994874	9302637	2.36492	22	22	1	UAGGUGUAGCACACAGCAAAGGC	CUGCUUGCAGUCUGUGCCUGGGCAGGCC	UAGGUGUAGCACACAGCAAAGG	1	0	6	0	2 cited is not ma	Yes	fn-111	mb-01111	ax-1001011	ku-01	ss-111111101000
PID0488	Lin2016-hq	Rhsol	Rhi-milR-108		SRR1994871	8692379	5.29199	46	44	0.956522	UAGGUGUAGCACACAGCAAAGGC	CUGCUUGCAGUCUGUGCCUGGGCAGGCC	UAGGUGUAGCACACAGCAAAGG	1	0	16	0	2 cited is not ma	Yes	fn-111	mb-01011	ax-1001011	ku-01	ss-111111101000
PID0488	Lin2016-hq	Rhsol	Rhi-milR-108		SRR1994877	6052857	0.991267	6	5	0.833333	UAGGUGUAGCACACAGCAAAGGCC	CCUGCUUGCAGUCUGUGCCUGGGCAGGCC	UAGGUGUAGCACACAGCAAAGG	0	0	2	0	3 cited not expressed	Yes	fn-111	mb-01011	ax-1001011	ku-01	ss-111111101010
PID0488	Lin2016-hq	Rhsol	Rhi-milR-108		SRR1994875	4270606	0.936635	4	4	1	UUGCAGUCUGUGCCUGGGCAGG	GGUGUAGCACACAGCAAAG	UAGGUGUAGCACACAGCAAAGG	0	0	1	0	3 cited not expressed	No	fn-011	mb-01111	ax-1001011	ku-01	ss-110111101000
PID0489	Lin2016-hq	Rhsol	Rhi-milR-15		SRR1994877	6052857	3.13901	19	19	1	UUUAGCAACUGGGACAAUGCA	UGGACAGACAAGCUUCUGUUGG	AGAAUGGGCUUGCAUGAACAGG	0	0	9	0	3 cited not expressed	Yes	fn-111	mb-00110	ax-1001011	ku-01	ss-111111101110
PID0489	Lin2016-hq	Rhsol	Rhi-milR-15		SRR1994872	9065193	1.76499	16	16	1	UUUAGCAACUGGGACAAUGCA	UGGACAGACAAGCUUCUGUUGG	AGAAUGGGCUUGCAUGAACAGG	0	0	10	0	3 cited not expressed	Yes	fn-111	mb-00010	ax-1001011	ku-01	ss-111111101110
PID0489	Lin2016-hq	Rhsol	Rhi-milR-15		SRR1994876	6833927	2.48759	17	17	1	UUUAGCAACUGGGACAAUGCA	UGGACAGACAAGCUUCUGUUGG	AGAAUGGGCUUGCAUGAACAGG	0	0	5	0	3 cited not expressed	Yes	fn-111	mb-00010	ax-1001011	ku-01	ss-111111101110
PID0489	Lin2016-hq	Rhsol	Rhi-milR-15		SRR1994873	8626632	3.82536	33	33	1	UUUAGCAACUGGGACAAUGCA	UGGACAGACAAGCUUCUGUUGG	AGAAUGGGCUUGCAUGAACAGG	0	0	17	0	3 cited not expressed	Yes	fn-111	mb-00010	ax-1001011	ku-01	ss-111111101110
PID0489	Lin2016-hq	Rhsol	Rhi-milR-15		SRR1994874	9302637	3.1174	29	27	0.931034	UUUAGCAACUGGGACAAUGCA	UGGACAGACAAGCUUCUGUUGG	AGAAUGGGCUUGCAUGAACAGG	0	0	10	0	3 cited not expressed	Yes	fn-111	mb-00110	ax-1001011	ku-01	ss-111111101100
PID0489	Lin2016-hq	Rhsol	Rhi-milR-15		SRR1994871	8692379	9.54859	83	82	0.987952	UAGAAUGGGCUUGCAUGAACAGG	UGGACAGACAAGCUUCUGUUGGG	AGAAUGGGCUUGCAUGAACAGG	1	0	25	0	2 cited is not ma	Yes	fn-111	mb-01111	ax-1001011	ku-01	ss-111111101100
PID0489	Lin2016-hq	Rhsol	Rhi-milR-15		SRR1994875	4270606	2.10743	9	9	1	UAGAAUGGGCUUGCAUGAACAGG	UGGACAGACAAGCUUCUGUUGGG	AGAAUGGGCUUGCAUGAACAGG	0	0	3	0	3 cited not expressed	Yes	fn-111	mb-01011	ax-1001011	ku-01	ss-111111101100
PID0490	Lin2016-hq	Rhsol	Rhi-milR-163		SRR1994872	9065193	1.8753	17	16	0.941176	UUGACCAUGGAGACUGCUUGUGC	UAUGAAGGAGAUCUUCUGGUUGAGG	UUGACCAUGGAGACUGCUUGUG	2	0	8	0	2 cited is not ma	Yes	fn-111	mb-01111	ax-1011011	ku-01	ss-111111101110
PID0490	Lin2016-hq	Rhsol	Rhi-milR-163		SRR1994875	4270606	0.936635	4	4	1	UUGACCAUGGAGACUGCUUGUGC	UAUGAAGGAGAUCUUCUGGUUGAGG	UUGACCAUGGAGACUGCUUGUG	1	0	3	0	2 cited is not ma	Yes	fn-111	mb-01011	ax-1011111	ku-01	ss-111111101110
PID0490	Lin2016-hq	Rhsol	Rhi-milR-163		SRR1994874	9302637	1.82744	17	17	1	UUGACCAUGGAGACUGCUUGUGC	UAUGAAGGAGAUCUUCUGGUUGAGG	UUGACCAUGGAGACUGCUUGUG	2	0	10	0	2 cited is not ma	Yes	fn-111	mb-01011	ax-1011111	ku-01	ss-111111101110
PID0490	Lin2016-hq	Rhsol	Rhi-milR-163		SRR1994877	6052857	0.660845	4	4	1	UUGACCAUGGAGACUGCUUGUGC	UAUGAAGGAGAUCUUCUGGUUGAGG	UUGACCAUGGAGACUGCUUGUG	0	0	2	0	3 cited not expressed	Yes	fn-111	mb-01011	ax-1011111	ku-01	ss-111111101110
PID0490	Lin2016-hq	Rhsol	Rhi-milR-163		SRR1994873	8626632	1.50696	13	13	1	UUGACCAUGGAGACUGCUUGUGC	UAUGAAGGAGAUCUUCUGGUUGAGG	UUGACCAUGGAGACUGCUUGUG	0	0	4	0	3 cited not expressed	Yes	fn-111	mb-01111	ax-1011011	ku-01	ss-111111101100
PID0490	Lin2016-hq	Rhsol	Rhi-milR-163		SRR1994876	6833927	0.731644	5	4	0.8	UUGACCAUGGAGACUGCUUGUGC	UAUGAAGGAGAUCUUCUGGUUGAGG	UUGACCAUGGAGACUGCUUGUG	1	0	2	0	2 cited is not ma	No	fn-001	mb-01011	ax-1011011	ku-01	ss-111110101110
PID0490	Lin2016-hq	Rhsol	Rhi-milR-163		SRR1994871	8692379	1.15043	10	10	1	UUGACCAUGGAGACUGCUUGUG	AUGAAGGAGAUCUUCUGGUUGAGG	UUGACCAUGGAGACUGCUUGUG	1	0	1	0	1 cited is ma	No	fn-011	mb-01011	ax-1011011	ku-01	ss-100111101100
PID0491	Lin2016-hq	Rhsol	Rhi-milR-112		SRR1994871	8692379	3678.85	31978	203	0.00634811	UAUGGCCGUGGAUACUUUGC	GACUUGUAUCCAUCCCAUUAAGC	UAUGGCCGUGGAUACUUUGCAA	5	0	116	0	2 cited is not ma	No	fn-101	mb-01111	ax-1011011	ku-01	ss-111111001100
PID0491	Lin2016-hq	Rhsol	Rhi-milR-112		SRR1994872	9065193	6117.24	55454	96	0.00173116	UAUGGCCGUGGAUACUUUGCAAU	UGUGACUUGUAUCCAUCCCAUUAAGC	UAUGGCCGUGGAUACUUUGCAA	4	0	25	0	2 cited is not ma	No	fn-101	mb-01111	ax-1001011	ku-01	ss-111111001100
PID0491	Lin2016-hq	Rhsol	Rhi-milR-112		SRR1994876	6833927	3639.64	24873	98	0.00394002	UAUGGCCGUGGAUACUUUGCAAU	UGUGACUUGUAUCCAUCCCAUUAAGC	UAUGGCCGUGGAUACUUUGCAA	8	0	38	0	2 cited is not ma	No	fn-101	mb-01111	ax-1001011	ku-01	ss-111111001100
PID0491	Lin2016-hq	Rhsol	Rhi-milR-112		SRR1994875	4270606	3249.19	13876	29	0.00208994	UAUGGCCGUGGAUACUUUGCAAU	UGUGACUUGUAUCCAUCCCAUUAAGC	UAUGGCCGUGGAUACUUUGCAA	2	0	10	0	2 cited is not ma	No	fn-101	mb-01111	ax-1001011	ku-01	ss-111111001100
PID0491	Lin2016-hq	Rhsol	Rhi-milR-112		SRR1994873	8626632	6896.43	59493	57	0.000958096	UAUGGCCGUGGAUACUUUGCAAU	UGUGACUUGUAUCCAUCCCAUUAAGC	UAUGGCCGUGGAUACUUUGCAA	1	0	15	0	2 cited is not ma	No	fn-101	mb-01011	ax-1001011	ku-01	ss-111111001100
PID0491	Lin2016-hq	Rhsol	Rhi-milR-112		SRR1994874	9302637	3228.33	30032	51	0.00169819	UAUGGCCGUGGAUACUUUGCAAU	UGUGACUUGUAUCCAUCCCAUUAAGC	UAUGGCCGUGGAUACUUUGCAA	2	0	17	0	2 cited is not ma	No	fn-101	mb-01011	ax-1001011	ku-01	ss-111111001100
PID0491	Lin2016-hq	Rhsol	Rhi-milR-112		SRR1994877	6052857	1537.95	9309	60	0.00644538	UAUGGCCGUGGAUACUUUGCAAU	UGUGACUUGUAUCCAUCCCAUUAAGC	UAUGGCCGUGGAUACUUUGCAA	4	0	25	0	2 cited is not ma	No	fn-101	mb-01011	ax-1001011	ku-01	ss-111111001100
PID0492	Lin2016-hq	Rhsol	Rhi-milR-66		SRR1994876	6833927	310.51	2122	2122	1	UGUUUUGUGUUGGUUUGUUCUCA	UGAGCAAAUCCACACAAUACACC	GAGCAAAUCCACACAAUACACC	0	70	1699	29	3 cited not expressed	Yes	fn-111	mb-11111	ax-1111111	ku-11	ss-111111111111
PID0492	Lin2016-hq	Rhsol	Rhi-milR-66		SRR1994873	8626632	60.2784	520	520	1	UGUUUUGUGUUGGUUUGUUCUCA	UGAGCAAAUCCACACAAUACACC	GAGCAAAUCCACACAAUACACC	0	15	386	14	3 cited not expressed	Yes	fn-111	mb-11111	ax-1111111	ku-11	ss-111111111111
PID0492	Lin2016-hq	Rhsol	Rhi-milR-66		SRR1994871	8692379	375.386	3263	3262	0.999694	UGUUUUGUGUUGGUUUGUUCUCA	UGAGCAAAUCCACACAAUACACC	GAGCAAAUCCACACAAUACACC	0	51	2337	36	3 cited not expressed	Yes	fn-111	mb-11111	ax-1111111	ku-11	ss-111111111111
PID0492	Lin2016-hq	Rhsol	Rhi-milR-66		SRR1994874	9302637	90.942	846	846	1	UGUUUUGUGUUGGUUUGUUCUCA	UGAGCAAAUCCACACAAUACACC	GAGCAAAUCCACACAAUACACC	0	37	637	12	3 cited not expressed	Yes	fn-111	mb-11111	ax-1111111	ku-11	ss-111111111111
PID0492	Lin2016-hq	Rhsol	Rhi-milR-66		SRR1994877	6052857	231.791	1403	1403	1	UGUUUUGUGUUGGUUUGUUCUCA	UGAGCAAAUCCACACAAUACACC	GAGCAAAUCCACACAAUACACC	0	22	1042	11	3 cited not expressed	Yes	fn-111	mb-11111	ax-1111111	ku-11	ss-111111111111
PID0492	Lin2016-hq	Rhsol	Rhi-milR-66		SRR1994872	9065193	55.9282	507	507	1	UGUUUUGUGUUGGUUUGUUCUCA	UGAGCAAAUCCACACAAUACACC	GAGCAAAUCCACACAAUACACC	0	21	372	8	3 cited not expressed	Yes	fn-111	mb-01111	ax-1111111	ku-11	ss-111111111111
PID0492	Lin2016-hq	Rhsol	Rhi-milR-66		SRR1994875	4270606	117.079	500	500	1	UGUUUUGUGUUGGUUUGUUCUCA	UGAGCAAAUCCACACAAUACACC	GAGCAAAUCCACACAAUACACC	0	15	374	8	3 cited not expressed	Yes	fn-111	mb-01111	ax-1111111	ku-11	ss-111111111111
PID0493	Lin2016-hq	Rhsol	Rhi-milR-94		SRR1994876	6833927	310.51	2122	2122	1	UGUUUUGUGUUGGUUUGUUCUCA	UGAGCAAAUCCACACAAUACACC	GUUUUGUGUUGGUUUGUUCUCA	42	1	1699	29	2 cited is not ma	Yes	fn-111	mb-11111	ax-1111111	ku-11	ss-111111111111
PID0493	Lin2016-hq	Rhsol	Rhi-milR-94		SRR1994873	8626632	60.2784	520	520	1	UGUUUUGUGUUGGUUUGUUCUCA	UGAGCAAAUCCACACAAUACACC	GUUUUGUGUUGGUUUGUUCUCA	6	0	386	14	2 cited is not ma	Yes	fn-111	mb-11111	ax-1111111	ku-11	ss-111111111111
PID0493	Lin2016-hq	Rhsol	Rhi-milR-94		SRR1994871	8692379	375.386	3263	3262	0.999694	UGUUUUGUGUUGGUUUGUUCUCA	UGAGCAAAUCCACACAAUACACC	GUUUUGUGUUGGUUUGUUCUCA	69	3	2337	36	2 cited is not ma	Yes	fn-111	mb-11111	ax-1111111	ku-11	ss-111111111111
PID0493	Lin2016-hq	Rhsol	Rhi-milR-94		SRR1994874	9302637	90.942	846	846	1	UGUUUUGUGUUGGUUUGUUCUCA	UGAGCAAAUCCACACAAUACACC	GUUUUGUGUUGGUUUGUUCUCA	7	0	637	12	2 cited is not ma	Yes	fn-111	mb-11111	ax-1111111	ku-11	ss-111111111111
PID0493	Lin2016-hq	Rhsol	Rhi-milR-94		SRR1994877	6052857	231.791	1403	1403	1	UGUUUUGUGUUGGUUUGUUCUCA	UGAGCAAAUCCACACAAUACACC	GUUUUGUGUUGGUUUGUUCUCA	3	1	1042	11	2 cited is not ma	Yes	fn-111	mb-11111	ax-1111111	ku-11	ss-111111111111
PID0493	Lin2016-hq	Rhsol	Rhi-milR-94		SRR1994872	9065193	55.9282	507	507	1	UGUUUUGUGUUGGUUUGUUCUCA	UGAGCAAAUCCACACAAUACACC	GUUUUGUGUUGGUUUGUUCUCA	3	0	372	8	2 cited is not ma	Yes	fn-111	mb-01111	ax-1111111	ku-11	ss-111111111111
PID0493	Lin2016-hq	Rhsol	Rhi-milR-94		SRR1994875	4270606	117.079	500	500	1	UGUUUUGUGUUGGUUUGUUCUCA	UGAGCAAAUCCACACAAUACACC	GUUUUGUGUUGGUUUGUUCUCA	7	1	374	8	2 cited is not ma	Yes	fn-111	mb-01111	ax-1111111	ku-11	ss-111111111111
PID0494	Lin2016-hq	Rhsol	Rhi-milR-11		SRR1994871	8692379	0.230087	2	2	1	ACCAUGGACUGGUCUAGACGGGUC	CUGUCUAGCCUCGGUUCACUUC	ACCAUGGACUGGUCUAGACGGG	0	0	1	0	3 cited not expressed	No	fn-011	mb-01011	ax-1011111	ku-01	ss-110111111110
PID0494	Lin2016-hq	Rhsol	Rhi-milR-11		SRR1994876	6833927	0.731644	5	5	1	AACCAUGGACUGGUCUAGACGGG	GUCUAGCCUCGGUUCACUUCG	ACCAUGGACUGGUCUAGACGGG	0	0	3	0	3 cited not expressed	No	fn-011	mb-01011	ax-1011011	ku-01	ss-111111111110
PID0494	Lin2016-hq	Rhsol	Rhi-milR-11		SRR1994873	8626632	0.34776	3	2	0.666667	ACCAUGGACUGGUCUAGACGGGU	UGUCUAGCCUCGGUUCACUUC	ACCAUGGACUGGUCUAGACGGG	0	0	1	0	3 cited not expressed	No	fn-001	mb-01011	ax-1011011	ku-01	ss-110110111110
PID0494	Lin2016-hq	Rhsol	Rhi-milR-11		SRR1994877	6052857	0.330422	2	0	0	ACCAUGGACUGGUCUAGACGGG	GUCUAGCCUCGGUUCACUUC	ACCAUGGACUGGUCUAGACGGG	0	0	0	0	3 cited not expressed	No	fn-001	mb-01011	ax-1011011	ku-01	ss-110111011100
PID0494	Lin2016-hq	Rhsol	Rhi-milR-11		SRR1994874	9302637	0.322489	3	1	0.333333	ACCAUGGACUGGUCUAGACGGG	GUCUAGCCUCGGUUCACUUC	ACCAUGGACUGGUCUAGACGGG	1	0	1	0	1 cited is ma	No	fn-001	mb-01011	ax-1011011	ku-01	ss-110110011100
PID0494	Lin2016-hq	Rhsol	Rhi-milR-11		SRR1994875	4270606	0	0	0	NA	ACCAUGGACUGGUCUAGACGGG	GUCUAGCCUCGGUUCACUUC	ACCAUGGACUGGUCUAGACGGG	0	0	0	0	4 locus not expressed	No	fn-001	mb-01011	ax-1011011	ku-01	ss-000110011100
PID0494	Lin2016-hq	Rhsol	Rhi-milR-11		SRR1994872	9065193	0	0	0	NA	ACCAUGGACUGGUCUAGACGGG	GUCUAGCCUCGGUUCACUUC	ACCAUGGACUGGUCUAGACGGG	0	0	0	0	4 locus not expressed	No	fn-001	mb-01011	ax-1011011	ku-01	ss-000110011100
PID0495	Lin2016-hq	Rhsol	Rhi-milR-167		SRR1994871	8692379	9.54859	83	72	0.86747	UUGGCAUCCGGGACAAGGUCUAU	GUGUUGUUUCAGUGCCUUGGAU	UUGGCAUCCGGGACAAGGUCUA	1	0	12	0	2 cited is not ma	Yes	fn-111	mb-01111	ax-1011011	ku-01	ss-111111111100
PID0495	Lin2016-hq	Rhsol	Rhi-milR-167		SRR1994873	8626632	3.12984	27	24	0.888889	UUGGCAUCCGGGACAAGGUCUAU	GUGUUGUUUCAGUGCCUUGGAU	UUGGCAUCCGGGACAAGGUCUA	0	0	4	0	3 cited not expressed	No	fn-011	mb-01011	ax-1011011	ku-01	ss-111111111100
PID0495	Lin2016-hq	Rhsol	Rhi-milR-167		SRR1994877	6052857	10.4083	63	60	0.952381	UUGGCAUCCGGGACAAGGUCUAU	GUGUUGUUUCAGUGCCUUGGAU	UUGGCAUCCGGGACAAGGUCUA	3	0	10	0	2 cited is not ma	Yes	fn-111	mb-01011	ax-1011011	ku-01	ss-111111111100
PID0495	Lin2016-hq	Rhsol	Rhi-milR-167		SRR1994872	9065193	2.97843	27	23	0.851852	UUUGGCAUCCGGGACAAGGUCUAU	GUGUUGUUUCAGUGCCUUGGAUU	UUGGCAUCCGGGACAAGGUCUA	1	0	3	0	2 cited is not ma	Yes	fn-111	mb-01111	ax-1011011	ku-01	ss-111111111100
PID0495	Lin2016-hq	Rhsol	Rhi-milR-167		SRR1994876	6833927	4.68252	32	26	0.8125	UUUGGCAUCCGGGACAAGGUCU	GUUGUUUCAGUGCCUUGGAUU	UUGGCAUCCGGGACAAGGUCUA	1	0	3	0	2 cited is not ma	Yes	fn-111	mb-01011	ax-1011011	ku-01	ss-111111111100
PID0495	Lin2016-hq	Rhsol	Rhi-milR-167		SRR1994874	9302637	7.41725	69	54	0.782609	UUUGGCAUCCGGGACAAGGUCU	GUUGUUUCAGUGCCUUGGAUU	UUGGCAUCCGGGACAAGGUCUA	3	0	7	0	2 cited is not ma	No	fn-101	mb-01011	ax-1011011	ku-01	ss-111110111100
PID0495	Lin2016-hq	Rhsol	Rhi-milR-167		SRR1994875	4270606	4.44902	19	12	0.631579	UUUGGCAUCCGGGACAAGGU	GUUGUUUCAGUGCCUUGGAUU	UUGGCAUCCGGGACAAGGUCUA	1	0	2	0	2 cited is not ma	No	fn-001	mb-01011	ax-1011011	ku-01	ss-101110111100
PID0496	Lin2016-hq	Rhsol	Rhi-milR-138		SRR1994872	9065193	5.62591	51	23	0.45098	UGGAGGCUGCAGGUGAACUGG	GCAUCAUUCCAGUCCAGUUCCAUU	UGGAGGCUGCAGGUGAAC	0	0	10	0	3 cited not expressed	No	fn-101	mb-01111	ax-1001011	ku-01	ss-111110001100
PID0496	Lin2016-hq	Rhsol	Rhi-milR-138		SRR1994875	4270606	10.5371	45	22	0.488889	UGGAGGCUGCAGGUGAACUGG	GCAUCAUUCCAGUCCAGUUCCAUU	UGGAGGCUGCAGGUGAAC	0	0	10	0	3 cited not expressed	No	fn-101	mb-01111	ax-1001011	ku-01	ss-111110001100
PID0496	Lin2016-hq	Rhsol	Rhi-milR-138		SRR1994871	8692379	23.0087	200	68	0.34	UGGAGGCUGCAGGUGAACUGG	GCAUCAUUCCAGUCCAGUUCCAUU	UGGAGGCUGCAGGUGAAC	1	0	25	0	2 cited is not ma	No	fn-101	mb-01111	ax-1001011	ku-01	ss-111110001100
PID0496	Lin2016-hq	Rhsol	Rhi-milR-138		SRR1994876	6833927	13.0233	89	37	0.41573	UGGAGGCUGCAGGUGAACUGG	GCAUCAUUCCAGUCCAGUUCCAUU	UGGAGGCUGCAGGUGAAC	0	0	18	0	3 cited not expressed	No	fn-101	mb-01011	ax-1001011	ku-01	ss-111110001100
PID0496	Lin2016-hq	Rhsol	Rhi-milR-138		SRR1994873	8626632	8.46217	73	34	0.465753	UGGAGGCUGCAGGUGAACUGG	GCAUCAUUCCAGUCCAGUUCCAUU	UGGAGGCUGCAGGUGAAC	0	0	22	0	3 cited not expressed	No	fn-101	mb-01011	ax-1001011	ku-01	ss-111110001100
PID0496	Lin2016-hq	Rhsol	Rhi-milR-138		SRR1994874	9302637	8.49222	79	33	0.417722	UGGAGGCUGCAGGUGAACUGG	GCAUCAUUCCAGUCCAGUUCCAUU	UGGAGGCUGCAGGUGAAC	0	0	20	0	3 cited not expressed	No	fn-101	mb-01011	ax-1001011	ku-01	ss-111110001100
PID0496	Lin2016-hq	Rhsol	Rhi-milR-138		SRR1994877	6052857	13.8777	84	31	0.369048	UGGAGGCUGCAGGUGAACUGG	GCAUCAUUCCAGUCCAGUUCCAUU	UGGAGGCUGCAGGUGAAC	0	0	18	0	3 cited not expressed	No	fn-101	mb-01011	ax-1001011	ku-01	ss-111110001100
PID0497	Lin2016-hq	Rhsol	Rhi-milR-144		SRR1994874	9302637	7.09476	66	10	0.151515	UUAGUGCCAGAGGAUUUCCAGG	AUGGGAUAUCUGCCUAGGU	UGGGAUAUCUGCCUAGGUGAUGGU	0	0	5	0	3 cited not expressed	No	fn-101	mb-01111	ax-1001011	ku-01	ss-111111001100
PID0497	Lin2016-hq	Rhsol	Rhi-milR-144		SRR1994876	6833927	7.90175	54	9	0.166667	UGGGAUAUCUGCCUAGGUGAUGG	AUCCUCUUAGUGCCAGAGGAUUUCCAG	UGGGAUAUCUGCCUAGGUGAUGGU	0	0	5	0	3 cited not expressed	No	fn-101	mb-01111	ax-1001011	ku-01	ss-111111001000
PID0497	Lin2016-hq	Rhsol	Rhi-milR-144		SRR1994875	4270606	7.9614	34	4	0.117647	UGGGAUAUCUGCCUAGGUGAUGG	AUCCUCUUAGUGCCAGAGGAUUUCCAG	UGGGAUAUCUGCCUAGGUGAUGGU	0	0	2	0	3 cited not expressed	No	fn-001	mb-01111	ax-1001011	ku-01	ss-111111001000
PID0497	Lin2016-hq	Rhsol	Rhi-milR-144		SRR1994872	9065193	7.94247	72	19	0.263889	UGGGAUAUCUGCCUAGGUGAUGG	AUCCUCUUAGUGCCAGAGGAUUUCCAG	UGGGAUAUCUGCCUAGGUGAUGGU	2	0	6	0	2 cited is not ma	No	fn-101	mb-01111	ax-1001011	ku-01	ss-111110001000
PID0497	Lin2016-hq	Rhsol	Rhi-milR-144		SRR1994873	8626632	8.34625	72	10	0.138889	UGGGAUAUCUGCCUAGGUGAUGGUG	UCAUCCUCUUAGUGCCAGAGGAUUUCCAG	UGGGAUAUCUGCCUAGGUGAUGGU	1	0	4	0	2 cited is not ma	No	fn-101	mb-01011	ax-1001001	ku-01	ss-111011001000
PID0497	Lin2016-hq	Rhsol	Rhi-milR-144		SRR1994871	8692379	76.7339	667	92	0.137931	UGGGAUAUCUGCCUAGGUGAUGGUG	UCAUCCUCUUAGUGCCAGAGGAUUUCCAG	UGGGAUAUCUGCCUAGGUGAUGGU	7	0	20	0	2 cited is not ma	No	fn-101	mb-01011	ax-1001001	ku-01	ss-111011001000
PID0497	Lin2016-hq	Rhsol	Rhi-milR-144		SRR1994877	6052857	7.76493	47	11	0.234043	UGGGAUAUCUGCCUAGGUGAUGGUG	UCAUCCUCUUAGUGCCAGAGGAUUUCCAG	UGGGAUAUCUGCCUAGGUGAUGGU	1	0	5	0	2 cited is not ma	No	fn-101	mb-01111	ax-1001001	ku-01	ss-111010001000
PID0498	Lin2016-hq	Rhsol	Rhi-milR-114		SRR1994872	9065193	5.40529	49	28	0.571429	UAUGUGUGACAUCUGAAGGAAGU	UUGCUUGUUGAAGCAGAGUCUAUUGUGCAAU	UAUGUGUGACAUCUGAAGGAAG	1	0	15	0	2 cited is not ma	No	fn-101	mb-00111	ax-1001011	ku-01	ss-111110101000
PID0498	Lin2016-hq	Rhsol	Rhi-milR-114		SRR1994876	6833927	6.87745	47	24	0.510638	UAUGUGUGACAUCUGAAGGAAGU	UUGCUUGUUGAAGCAGAGUCUAUUGUGCAAU	UAUGUGUGACAUCUGAAGGAAG	1	0	13	0	2 cited is not ma	No	fn-101	mb-00111	ax-1001011	ku-01	ss-111110101000
PID0498	Lin2016-hq	Rhsol	Rhi-milR-114		SRR1994873	8626632	4.86864	42	22	0.52381	UAUGUGUGACAUCUGAAGGAAGU	UUGCUUGUUGAAGCAGAGUCUAUUGUGCAAU	UAUGUGUGACAUCUGAAGGAAG	1	0	7	0	2 cited is not ma	No	fn-101	mb-00111	ax-1001011	ku-01	ss-111110101000
PID0498	Lin2016-hq	Rhsol	Rhi-milR-114		SRR1994871	8692379	27.7254	241	157	0.651452	UAUGUGUGACAUCUGAAGGA	CUUGUUGAAGCAGAGUCUAUUGUGCAAU	UAUGUGUGACAUCUGAAGGAAG	16	0	33	0	2 cited is not ma	No	fn-101	mb-00111	ax-1001011	ku-01	ss-111110101000
PID0498	Lin2016-hq	Rhsol	Rhi-milR-114		SRR1994874	9302637	5.15983	48	25	0.520833	UAUGUGUGACAUCUGAAGGAAGU	UUGCUUGUUGAAGCAGAGUCUAUUGUGCAAU	UAUGUGUGACAUCUGAAGGAAG	4	0	8	0	2 cited is not ma	No	fn-101	mb-00111	ax-1001011	ku-01	ss-111110101000
PID0498	Lin2016-hq	Rhsol	Rhi-milR-114		SRR1994875	4270606	4.21486	18	10	0.555556	UAUGUGUGACAUCUGAAGGAAGU	UUGCUUGUUGAAGCAGAGUCUAUUGUGCAAU	UAUGUGUGACAUCUGAAGGAAG	1	0	4	0	2 cited is not ma	No	fn-101	mb-00011	ax-1001011	ku-01	ss-111110101000
PID0498	Lin2016-hq	Rhsol	Rhi-milR-114		SRR1994877	6052857	8.42577	51	21	0.411765	UAUGUGUGACAUCUGAAGGAAGU	UUGCUUGUUGAAGCAGAGUCUAUUGUGCAAU	UAUGUGUGACAUCUGAAGGAAG	1	0	12	0	2 cited is not ma	No	fn-101	mb-00111	ax-1001011	ku-01	ss-111110001000
PID0499	Lin2016-hq	Rhsol	Rhi-milR-69		SRR1994873	8626632	1.50696	13	11	0.846154	UGAGGCCUGUAGUUGUUGGAUGGG	CGUCCAACAAGGGAUUCAAU	GAGGCCUGUAGUUGUUGGAUGGG	0	0	10	0	3 cited not expressed	Yes	fn-111	mb-01011	ax-1011111	ku-01	ss-111111111010
PID0499	Lin2016-hq	Rhsol	Rhi-milR-69		SRR1994874	9302637	1.39745	13	12	0.923077	UGAGGCCUGUAGUUGUUGGAUGGG	CGUCCAACAAGGGAUUCAAU	GAGGCCUGUAGUUGUUGGAUGGG	0	0	9	0	3 cited not expressed	Yes	fn-111	mb-01011	ax-1011111	ku-01	ss-111111111010
PID0499	Lin2016-hq	Rhsol	Rhi-milR-69		SRR1994872	9065193	2.31655	21	18	0.857143	UGAGGCCUGUAGUUGUUGGAUGGG	CGUCCAACAAGGGAUUCAAU	GAGGCCUGUAGUUGUUGGAUGGG	0	0	12	0	3 cited not expressed	Yes	fn-111	mb-01011	ax-1011011	ku-01	ss-111111111010
PID0499	Lin2016-hq	Rhsol	Rhi-milR-69		SRR1994876	6833927	1.75595	12	10	0.833333	UGAGGCCUGUAGUUGUUGGAUGGG	CGUCCAACAAGGGAUUCAAU	GAGGCCUGUAGUUGUUGGAUGGG	0	0	6	0	3 cited not expressed	Yes	fn-111	mb-01011	ax-1011011	ku-01	ss-101111111010
PID0499	Lin2016-hq	Rhsol	Rhi-milR-69		SRR1994875	4270606	1.63911	7	7	1	UGAGGCCUGUAGUUGUUGGAUGGG	CGUCCAACAAGGGAUUCAAU	GAGGCCUGUAGUUGUUGGAUGGG	0	0	4	0	3 cited not expressed	Yes	fn-111	mb-01011	ax-1011011	ku-01	ss-101111111010
PID0499	Lin2016-hq	Rhsol	Rhi-milR-69		SRR1994871	8692379	1.49556	13	10	0.769231	UGAGGCCUGUAGUUGUUGGAUGGG	CGUCCAACAAGGGAUUCAAU	GAGGCCUGUAGUUGUUGGAUGGG	0	0	7	0	3 cited not expressed	No	fn-101	mb-01011	ax-1011011	ku-01	ss-111110111010
PID0499	Lin2016-hq	Rhsol	Rhi-milR-69		SRR1994877	6052857	2.31296	14	10	0.714286	UGAGGCCUGUAGUUGUUGGAUGGG	CGUCCAACAAGGGAUUCAAU	GAGGCCUGUAGUUGUUGGAUGGG	0	0	9	0	3 cited not expressed	No	fn-101	mb-01011	ax-1011011	ku-01	ss-111110111010
PID0501	Lin2016-hq	Rhsol	Rhi-milR-165		SRR1994872	9065193	11.1415	101	11	0.108911	UUGGCAGGGUUUGGAUGUGUAU	ACACCUCCUCCAUUGCCUUUU	UUGGCAGGGUUUGGAUGUGUAUC	1	0	3	0	2 cited is not ma	No	fn-001	mb-01011	ax-1001011	ku-01	ss-111111001100
PID0501	Lin2016-hq	Rhsol	Rhi-milR-165		SRR1994876	6833927	9.07238	62	8	0.129032	UUGGCAGGGUUUGGAUGUGUAU	ACACCUCCUCCAUUGCCUUUU	UUGGCAGGGUUUGGAUGUGUAUC	0	0	2	0	3 cited not expressed	No	fn-001	mb-01011	ax-1001011	ku-01	ss-111111001100
PID0501	Lin2016-hq	Rhsol	Rhi-milR-165		SRR1994871	8692379	7.13268	62	10	0.16129	UUGGCAGGGUUUGGAUGUGUAUCU	AAACACCUCCUCCAUUGCCUUUU	UUGGCAGGGUUUGGAUGUGUAUC	0	0	5	0	3 cited not expressed	No	fn-101	mb-01011	ax-1001011	ku-01	ss-111111001100
PID0501	Lin2016-hq	Rhsol	Rhi-milR-165		SRR1994874	9302637	19.0269	177	29	0.163842	UUGGCAGGGUUUGGAUGUGUAUCU	AAACACCUCCUCCAUUGCCUUUU	UUGGCAGGGUUUGGAUGUGUAUC	0	0	7	0	3 cited not expressed	No	fn-101	mb-01011	ax-1001011	ku-01	ss-111111001100
PID0501	Lin2016-hq	Rhsol	Rhi-milR-165		SRR1994873	8626632	14.6059	126	17	0.134921	UAUUGGCAGGGUUUGGAUGUGUA	CACCUCCUCCAUUGCCUUUUCU	UUGGCAGGGUUUGGAUGUGUAUC	0	0	4	0	3 cited not expressed	No	fn-001	mb-01010	ax-1001011	ku-01	ss-111111001100
PID0501	Lin2016-hq	Rhsol	Rhi-milR-165		SRR1994877	6052857	13.2169	80	12	0.15	UAUUGGCAGGGUUUGGAUGUGUA	CACCUCCUCCAUUGCCUUUUCU	UUGGCAGGGUUUGGAUGUGUAUC	1	0	2	0	2 cited is not ma	No	fn-001	mb-01010	ax-1001011	ku-01	ss-111111001100
PID0501	Lin2016-hq	Rhsol	Rhi-milR-165		SRR1994875	4270606	4.44902	19	4	0.210526	CUAUUGGCAGGGUUUGGAUG	UCCUCCAUUGCCUUUUCUU	UUGGCAGGGUUUGGAUGUGUAUC	0	0	1	0	3 cited not expressed	No	fn-001	mb-01010	ax-1001011	ku-01	ss-110110001100
PID0502	Lin2016-hq	Rhsol	Rhi-milR-145		SRR1994876	6833927	13.6086	93	93	1	UGGGAUGGGUGGGGGUGUUUAG	GAUCAUUUUAUCACGUACU	UGGGAUGGGUGGGGGUGUUUA	2	0	59	0	2 cited is not ma	Yes	fn-111	mb-01111	ax-1001111	ku-01	ss-111111101110
PID0502	Lin2016-hq	Rhsol	Rhi-milR-145		SRR1994875	4270606	12.6446	54	54	1	UGGGAUGGGUGGGGGUGUUUAG	GAUCAUUUUAUCACGUACU	UGGGAUGGGUGGGGGUGUUUA	3	0	30	0	2 cited is not ma	Yes	fn-111	mb-01111	ax-1001111	ku-01	ss-111111101110
PID0502	Lin2016-hq	Rhsol	Rhi-milR-145		SRR1994872	9065193	0.441248	4	4	1	UGGGAUGGGUGGGGGUGUUUAG	GAUCAUUUUAUCACGUACU	UGGGAUGGGUGGGGGUGUUUA	0	0	3	0	3 cited not expressed	No	fn-011	mb-01011	ax-1001111	ku-01	ss-111111101110
PID0502	Lin2016-hq	Rhsol	Rhi-milR-145		SRR1994874	9302637	1.50495	14	14	1	UGGGAUGGGUGGGGGUGUUUAG	GAUCAUUUUAUCACGUACU	UGGGAUGGGUGGGGGUGUUUA	0	0	10	0	3 cited not expressed	Yes	fn-111	mb-01011	ax-1001111	ku-01	ss-111111101110
PID0502	Lin2016-hq	Rhsol	Rhi-milR-145		SRR1994873	8626632	1.50696	13	13	1	UGGGAUGGGUGGGGGUGUUUAG	GAUCAUUUUAUCACGUACU	UGGGAUGGGUGGGGGUGUUUA	0	0	7	0	3 cited not expressed	Yes	fn-111	mb-01011	ax-1001011	ku-01	ss-111111101110
PID0502	Lin2016-hq	Rhsol	Rhi-milR-145		SRR1994877	6052857	16.0255	97	97	1	UGGGAUGGGUGGGGGUGUUUAG	GAUCAUUUUAUCACGUACU	UGGGAUGGGUGGGGGUGUUUA	1	0	50	0	2 cited is not ma	Yes	fn-111	mb-01011	ax-1001011	ku-01	ss-111111101110
PID0502	Lin2016-hq	Rhsol	Rhi-milR-145		SRR1994871	8692379	6.44243	56	56	1	UGGGAUGGGUGGGGGUGUUUAG	GAUCAUUUUAUCACGUACU	UGGGAUGGGUGGGGGUGUUUA	0	0	17	0	3 cited not expressed	Yes	fn-111	mb-01011	ax-1001011	ku-01	ss-101111101100
PID0503	Lin2016-hq	Rhsol	Rhi-milR-176		SRR1994877	6052857	0.495634	3	3	1	CAUUUUGGAAUUGCUGGAUGUGGU	UGUCAUUCACGCAAUACAUGUA	UUUGGAAUUGCUGGAUGUGGU	0	0	2	0	3 cited not expressed	No	fn-011	mb-01011	ax-1011111	ku-01	ss-111111111110
PID0503	Lin2016-hq	Rhsol	Rhi-milR-176		SRR1994872	9065193	2.31655	21	21	1	CAUUUUGGAAUUGCUGGAUGUGGU	UGUCAUUCACGCAAUACAUGUA	UUUGGAAUUGCUGGAUGUGGU	2	0	6	0	2 cited is not ma	Yes	fn-111	mb-01011	ax-1011011	ku-01	ss-111111111110
PID0503	Lin2016-hq	Rhsol	Rhi-milR-176		SRR1994876	6833927	1.17063	8	8	1	CAUUUUGGAAUUGCUGGAUGUGGU	UGUCAUUCACGCAAUACAUGUA	UUUGGAAUUGCUGGAUGUGGU	1	0	3	0	2 cited is not ma	Yes	fn-111	mb-01011	ax-1011011	ku-01	ss-111111111100
PID0503	Lin2016-hq	Rhsol	Rhi-milR-176		SRR1994873	8626632	1.97064	17	15	0.882353	CAUUUUGGAAUUGCUGGAUGUGGU	UGUCAUUCACGCAAUACAUGUA	UUUGGAAUUGCUGGAUGUGGU	1	0	4	0	2 cited is not ma	Yes	fn-111	mb-01011	ax-1011011	ku-01	ss-111111111100
PID0503	Lin2016-hq	Rhsol	Rhi-milR-176		SRR1994875	4270606	1.40495	6	6	1	UUUUGGAAUUGCUGGAUGUGGU	UGUCAUUCACGCAAUACAUG	UUUGGAAUUGCUGGAUGUGGU	0	0	3	0	3 cited not expressed	Yes	fn-111	mb-01011	ax-1011011	ku-01	ss-111111111110
PID0503	Lin2016-hq	Rhsol	Rhi-milR-176		SRR1994874	9302637	1.39745	13	13	1	AUUUUGGAAUUGCUGGAUGUGGU	UGUCAUUCACGCAAUACAUGU	UUUGGAAUUGCUGGAUGUGGU	0	0	3	0	3 cited not expressed	Yes	fn-111	mb-01011	ax-1011011	ku-01	ss-111111111110
PID0503	Lin2016-hq	Rhsol	Rhi-milR-176		SRR1994871	8692379	0.115043	1	1	1	UUGGAAUUGCUGGAUGUGGUG	UUGUCAUUCACGCAAUACAUGU	UUUGGAAUUGCUGGAUGUGGU	0	0	1	0	3 cited not expressed	No	fn-011	mb-01011	ax-1011111	ku-01	ss-110111111110
PID0504	Lin2016-hq	Rhsol	Rhi-milR-161		SRR1994872	9065193	18.0912	164	139	0.847561	UCUUGAGAGGUUUGGCUGGAGGC	CUUCAGUGGUAGGCUUGGUUGUUG	UUCAGUGGUAGGCUUGGUUGUUGG	10	3	21	0	2 cited is not ma	Yes	fn-111	mb-01011	ax-1001011	ku-01	ss-111111101100
PID0504	Lin2016-hq	Rhsol	Rhi-milR-161		SRR1994876	6833927	6.14581	42	35	0.833333	UCUUGAGAGGUUUGGCUGGAGGC	CUUCAGUGGUAGGCUUGGUUGUUG	UUCAGUGGUAGGCUUGGUUGUUGG	2	0	5	0	2 cited is not ma	Yes	fn-111	mb-01011	ax-1001011	ku-01	ss-111111101100
PID0504	Lin2016-hq	Rhsol	Rhi-milR-161		SRR1994873	8626632	17.0403	147	128	0.870748	UCUUGAGAGGUUUGGCUGGAGGC	CUUCAGUGGUAGGCUUGGUUGUUG	UUCAGUGGUAGGCUUGGUUGUUGG	12	0	14	0	2 cited is not ma	Yes	fn-111	mb-01011	ax-1001011	ku-01	ss-111111101100
PID0504	Lin2016-hq	Rhsol	Rhi-milR-161		SRR1994874	9302637	13.9745	130	112	0.861538	UCUUGAGAGGUUUGGCUGGAGGC	CUUCAGUGGUAGGCUUGGUUGUUG	UUCAGUGGUAGGCUUGGUUGUUGG	6	4	14	0	2 cited is not ma	Yes	fn-111	mb-01011	ax-1001011	ku-01	ss-111111101100
PID0504	Lin2016-hq	Rhsol	Rhi-milR-161		SRR1994875	4270606	3.9807	17	16	0.941176	UCUUGAGAGGUUUGGCUGGAGG	UUCAGUGGUAGGCUUGGUUGUUG	UUCAGUGGUAGGCUUGGUUGUUGG	0	0	2	0	3 cited not expressed	Yes	fn-111	mb-01011	ax-1001011	ku-01	ss-111111101100
PID0504	Lin2016-hq	Rhsol	Rhi-milR-161		SRR1994871	8692379	2.99113	26	23	0.884615	UUCAGUGGUAGGCUUGGUUGUUGG	AUCUUGAGAGGUUUGGCUGGAGG	UUCAGUGGUAGGCUUGGUUGUUGG	2	0	2	0	1 cited is ma	No	fn-011	mb-01011	ax-1001011	ku-01	ss-111111101100
PID0504	Lin2016-hq	Rhsol	Rhi-milR-161		SRR1994877	6052857	3.63465	22	21	0.954545	UCUUGAGAGGUUUGGCUGGA	CAGUGGUAGGCUUGGUUGUUG	UUCAGUGGUAGGCUUGGUUGUUGG	1	0	3	0	2 cited is not ma	No	fn-011	mb-01011	ax-1001011	ku-01	ss-111111101100
PID0505	Lin2016-hq	Rhsol	Rhi-milR-132		SRR1994873	8626632	4.75272	41	34	0.829268	UGAUGGGACUUCCUGAGUGGG	CAGGACUUGGGAGGAUUAUUGGG	UGAUGGGACUUCCUGAGUGG	1	0	6	2	2 cited is not ma	Yes	fn-111	mb-01111	ax-1111011	ku-01	ss-111111111101
PID0505	Lin2016-hq	Rhsol	Rhi-milR-132		SRR1994874	9302637	3.1174	29	26	0.896552	UGAUGGGACUUCCUGAGUGGG	CAGGACUUGGGAGGAUUAUUGGG	UGAUGGGACUUCCUGAGUGG	2	1	9	2	2 cited is not ma	Yes	fn-111	mb-01011	ax-1111011	ku-01	ss-111111111111
PID0505	Lin2016-hq	Rhsol	Rhi-milR-132		SRR1994872	9065193	3.19905	29	26	0.896552	UGAUGGGACUUCCUGAGUGGG	CAGGACUUGGGAGGAUUAUUGGG	UGAUGGGACUUCCUGAGUGG	0	0	7	1	3 cited not expressed	Yes	fn-111	mb-01011	ax-1111011	ku-01	ss-111111111101
PID0505	Lin2016-hq	Rhsol	Rhi-milR-132		SRR1994876	6833927	4.82885	33	30	0.909091	UGAUGGGACUUCCUGAGUGGGU	CCAGGACUUGGGAGGAUUAUUGGG	UGAUGGGACUUCCUGAGUGG	1	1	5	0	2 cited is not ma	Yes	fn-111	mb-01111	ax-1011011	ku-01	ss-111111111100
PID0505	Lin2016-hq	Rhsol	Rhi-milR-132		SRR1994875	4270606	4.91733	21	19	0.904762	UGAUGGGACUUCCUGAGUGGGU	CCAGGACUUGGGAGGAUUAUUGGG	UGAUGGGACUUCCUGAGUGG	0	1	3	0	3 cited not expressed	Yes	fn-111	mb-01011	ax-1011011	ku-01	ss-111111111100
PID0505	Lin2016-hq	Rhsol	Rhi-milR-132		SRR1994871	8692379	9.54859	83	77	0.927711	AGGACUUGGGAGGAUUAUUGGGA	CUGAUGGGACUUCCUGAGUGG	UGAUGGGACUUCCUGAGUGG	3	4	13	0	2 cited is not ma	Yes	fn-111	mb-01111	ax-1011011	ku-01	ss-111111111100
PID0505	Lin2016-hq	Rhsol	Rhi-milR-132		SRR1994877	6052857	10.7387	65	51	0.784615	AGGACUUGGGAGGAUUAUUGGGA	CUGAUGGGACUUCCUGAGUGG	UGAUGGGACUUCCUGAGUGG	0	1	11	0	3 cited not expressed	No	fn-101	mb-01011	ax-1011011	ku-01	ss-111110111100
PID0506	Lin2016-hq	Rhsol	Rhi-milR-143		SRR1994874	9302637	5.58981	52	32	0.615385	UGGGAGUAGAAGAGAUUGAAAGUG	CGCCCAGUCCUUAACUUCUUUG	UGGGAGUAGAAGAGAUUGAAAGU	2	0	20	0	2 cited is not ma	No	fn-101	mb-01111	ax-1001011	ku-01	ss-111110101000
PID0506	Lin2016-hq	Rhsol	Rhi-milR-143		SRR1994877	6052857	9.58225	58	31	0.534483	UGGGAGUAGAAGAGAUUGAAAGU	GCCCAGUCCUUAACUUCUUUG	UGGGAGUAGAAGAGAUUGAAAGU	9	0	9	0	1 cited is ma	No	fn-101	mb-01111	ax-1001011	ku-01	ss-111110101000
PID0506	Lin2016-hq	Rhsol	Rhi-milR-143		SRR1994873	8626632	3.59352	31	13	0.419355	UGGGAGUAGAAGAGAUUGAAAGUG	CGCCCAGUCCUUAACUUCUUUG	UGGGAGUAGAAGAGAUUGAAAGU	1	0	6	0	2 cited is not ma	No	fn-101	mb-01111	ax-1001011	ku-01	ss-111110001000
PID0506	Lin2016-hq	Rhsol	Rhi-milR-143		SRR1994872	9065193	4.30217	39	13	0.333333	UGGGAGUAGAAGAGAUUGAAAG	CCCAGUCCUUAACUUCUUUG	UGGGAGUAGAAGAGAUUGAAAGU	1	0	4	0	2 cited is not ma	No	fn-101	mb-01011	ax-1001011	ku-01	ss-111110001000
PID0506	Lin2016-hq	Rhsol	Rhi-milR-143		SRR1994876	6833927	4.82885	33	14	0.424242	UGGGAGUAGAAGAGAUUGAAAGUG	CGCCCAGUCCUUAACUUCUUUG	UGGGAGUAGAAGAGAUUGAAAGU	0	0	8	0	3 cited not expressed	No	fn-101	mb-01011	ax-1001011	ku-01	ss-111110001000
PID0506	Lin2016-hq	Rhsol	Rhi-milR-143		SRR1994875	4270606	5.61981	24	8	0.333333	UGGGAGUAGAAGAGAUUGAAAGUG	CGCCCAGUCCUUAACUUCUUUG	UGGGAGUAGAAGAGAUUGAAAGU	0	0	4	0	3 cited not expressed	No	fn-101	mb-01011	ax-1001011	ku-01	ss-111110001000
PID0506	Lin2016-hq	Rhsol	Rhi-milR-143		SRR1994871	8692379	11.6194	101	41	0.405941	UGGGAGUAGAAGAGAUUGAAAGUG	CGCCCAGUCCUUAACUUCUUUG	UGGGAGUAGAAGAGAUUGAAAGU	1	0	19	0	2 cited is not ma	No	fn-101	mb-01011	ax-1001011	ku-01	ss-111110001000
PID0507	Lin2016-hq	Rhsol	Rhi-milR-169		SRR1994872	9065193	19.8562	180	135	0.75	UUGGGGCAAAUAUUAGGAACUG	GUCCAAAAGUAUUGGCUCCCUCAAGUG	UUGGGGCAAAUAUUAGGAACUGUUG	0	0	2	0	3 cited not expressed	No	fn-001	mb-01111	ax-1001011	ku-01	ss-111110101000
PID0507	Lin2016-hq	Rhsol	Rhi-milR-169		SRR1994871	8692379	27.6104	240	167	0.695833	UUGGGGCAAAUAUUAGGAACUGU	GGUCCAAAAGUAUUGGCUCCCUCAAGUG	UUGGGGCAAAUAUUAGGAACUGUUG	0	0	3	0	3 cited not expressed	No	fn-101	mb-01111	ax-1001011	ku-01	ss-111110101000
PID0507	Lin2016-hq	Rhsol	Rhi-milR-169		SRR1994874	9302637	29.884	278	154	0.553957	UAUUGGCUCCCUCAAGUGUUU	GCCUUGGGGCAAAUAUU	UUGGGGCAAAUAUUAGGAACUGUUG	0	0	1	0	3 cited not expressed	No	fn-001	mb-01111	ax-1011011	ku-01	ss-110110101000
PID0507	Lin2016-hq	Rhsol	Rhi-milR-169		SRR1994876	6833927	18.1448	124	73	0.58871	UUGGGGCAAAUAUUAGGAACUG	GUCCAAAAGUAUUGGCUCCCUCAAGUG	UUGGGGCAAAUAUUAGGAACUGUUG	0	0	4	0	3 cited not expressed	No	fn-101	mb-01011	ax-1001011	ku-01	ss-111110101000
PID0507	Lin2016-hq	Rhsol	Rhi-milR-169		SRR1994873	8626632	24.3432	210	112	0.533333	UUGGGGCAAAUAUUAGGAACUGU	GGUCCAAAAGUAUUGGCUCCCUCAAGUG	UUGGGGCAAAUAUUAGGAACUGUUG	0	0	2	0	3 cited not expressed	No	fn-001	mb-01011	ax-1001011	ku-01	ss-111110101000
PID0507	Lin2016-hq	Rhsol	Rhi-milR-169		SRR1994877	6052857	42.2941	256	145	0.566406	UUGGGGCAAAUAUUAGGAACUG	GUCCAAAAGUAUUGGCUCCCUCAAGUG	UUGGGGCAAAUAUUAGGAACUGUUG	0	0	2	0	3 cited not expressed	No	fn-101	mb-01011	ax-1001011	ku-01	ss-111110101000
PID0507	Lin2016-hq	Rhsol	Rhi-milR-169		SRR1994875	4270606	11.7079	50	34	0.68	AAAGUAUUGGCUCCCUCAAGUG	UUGGGGCAAAUAUUAG	UUGGGGCAAAUAUUAGGAACUGUUG	0	0	1	0	3 cited not expressed	No	fn-001	mb-01011	ax-1001011	ku-01	ss-110110101000
PID0508	Lin2016-hq	Rhsol	Rhi-milR-134		SRR1994872	9065193	5.07435	46	46	1	UGCAGAGAUUGAGUUGGAUUGUG	CACAACUGUGACAAUUGAGGGCACC	UGCAGAGAUUGAGUUGGAUUGUG	10	0	10	0	1 cited is ma	Yes	fn-111	mb-01111	ax-1001011	ku-01	ss-111111101100
PID0508	Lin2016-hq	Rhsol	Rhi-milR-134		SRR1994874	9302637	4.94483	46	45	0.978261	UGCAGAGAUUGAGUUGGAUUGUG	CACAACUGUGACAAUUGAGGGCACC	UGCAGAGAUUGAGUUGGAUUGUG	13	0	13	0	1 cited is ma	Yes	fn-111	mb-01111	ax-1001011	ku-01	ss-111111101100
PID0508	Lin2016-hq	Rhsol	Rhi-milR-134		SRR1994877	6052857	5.45197	33	33	1	UGCAGAGAUUGAGUUGGAUUGUG	CACAACUGUGACAAUUGAGGGCACC	UGCAGAGAUUGAGUUGGAUUGUG	8	0	8	0	1 cited is ma	Yes	fn-111	mb-01111	ax-1001011	ku-01	ss-111111101100
PID0508	Lin2016-hq	Rhsol	Rhi-milR-134		SRR1994876	6833927	4.38986	30	30	1	UGCAGAGAUUGAGUUGGAUUGUG	CACAACUGUGACAAUUGAGGGCACC	UGCAGAGAUUGAGUUGGAUUGUG	6	0	6	0	1 cited is ma	Yes	fn-111	mb-01011	ax-1001011	ku-01	ss-111111101100
PID0508	Lin2016-hq	Rhsol	Rhi-milR-134		SRR1994875	4270606	2.34159	10	10	1	UGCAGAGAUUGAGUUGGAUUGUGC	ACACAACUGUGACAAUUGAGGGCACC	UGCAGAGAUUGAGUUGGAUUGUG	1	0	3	0	2 cited is not ma	Yes	fn-111	mb-01111	ax-1001011	ku-01	ss-111111101100
PID0508	Lin2016-hq	Rhsol	Rhi-milR-134		SRR1994873	8626632	4.86864	42	42	1	UGCAGAGAUUGAGUUGGAUUGUGC	ACACAACUGUGACAAUUGAGGGCACC	UGCAGAGAUUGAGUUGGAUUGUG	7	0	9	0	2 cited is not ma	Yes	fn-111	mb-01111	ax-1001011	ku-01	ss-111111101100
PID0508	Lin2016-hq	Rhsol	Rhi-milR-134		SRR1994871	8692379	1.61061	14	14	1	CAGAGAUUGAGUUGGAUUGUGCAG	GUACACAACUGUGACAAUUGAGGGCA	UGCAGAGAUUGAGUUGGAUUGUG	2	1	3	0	2 cited is not ma	Yes	fn-111	mb-01011	ax-1001011	ku-01	ss-101111101100
PID0509	Lin2016-hq	Rhsol	Rhi-milR-85		SRR1994876	6833927	6.43847	44	29	0.659091	UGGUGACUGUGGCUCUGAAGAGG	CUCUUGCUACUGCCGUUUGUUGCUCC	GGUGACUGUGGCUCUGAAGAGG	0	0	12	0	3 cited not expressed	No	fn-101	mb-01011	ax-1001011	ku-01	ss-111110101100
PID0509	Lin2016-hq	Rhsol	Rhi-milR-85		SRR1994874	9302637	3.54738	33	20	0.606061	UGGUGACUGUGGCUCUGAAGAGG	CUCUUGCUACUGCCGUUUGUUGCUCC	GGUGACUGUGGCUCUGAAGAGG	0	0	10	0	3 cited not expressed	No	fn-101	mb-01011	ax-1001011	ku-01	ss-111110101100
PID0509	Lin2016-hq	Rhsol	Rhi-milR-85		SRR1994872	9065193	1.54437	14	4	0.285714	UGGUGACUGUGGCUCUGAAGAGG	CUCUUGCUACUGCCGUUUGUUGCUCC	GGUGACUGUGGCUCUGAAGAGG	0	0	3	0	3 cited not expressed	No	fn-001	mb-01011	ax-1001011	ku-01	ss-111110001100
PID0509	Lin2016-hq	Rhsol	Rhi-milR-85		SRR1994875	4270606	3.51238	15	9	0.6	UGACUGUGGCUCUGAAGAGGCA	CACUCUUGCUACUGCCGUUUGUUGCU	GGUGACUGUGGCUCUGAAGAGG	0	0	3	0	3 cited not expressed	No	fn-101	mb-01011	ax-1001011	ku-01	ss-111110101000
PID0509	Lin2016-hq	Rhsol	Rhi-milR-85		SRR1994873	8626632	1.50696	13	6	0.461538	UGGUGACUGUGGCUCUGAAGAGG	CUCUUGCUACUGCCGUUUGUUGCUCC	GGUGACUGUGGCUCUGAAGAGG	0	0	2	0	3 cited not expressed	No	fn-001	mb-01011	ax-1001011	ku-01	ss-111110001100
PID0509	Lin2016-hq	Rhsol	Rhi-milR-85		SRR1994871	8692379	5.75217	50	25	0.5	UGGUGACUGUGGCUCUGAAGAGG	CUCUUGCUACUGCCGUUUGUUGCUCC	GGUGACUGUGGCUCUGAAGAGG	0	0	11	0	3 cited not expressed	No	fn-101	mb-01011	ax-1001011	ku-01	ss-111110001100
PID0509	Lin2016-hq	Rhsol	Rhi-milR-85		SRR1994877	6052857	6.93887	42	19	0.452381	UGACUGUGGCUCUGAAGAGGCA	CACUCUUGCUACUGCCGUUUGUUGCU	GGUGACUGUGGCUCUGAAGAGG	0	0	6	0	3 cited not expressed	No	fn-101	mb-01011	ax-1001011	ku-01	ss-111110001000
PID0510	Lin2016-hq	Rhsol	Rhi-milR-96		SRR1994871	8692379	4.37165	38	35	0.921053	UAAAGUAGUAGAGACCUUGG	UUGCGCUUCUCACUACC	UAAAGUAGUAGAGACCUUGGCC	1	0	14	0	2 cited is not ma	Yes	fn-111	mb-00111	ax-1001011	ku-01	ss-111111101100
PID0510	Lin2016-hq	Rhsol	Rhi-milR-96		SRR1994876	6833927	3.21923	22	20	0.909091	UAAAGUAGUAGAGACCUUGG	UUGCGCUUCUCACUACC	UAAAGUAGUAGAGACCUUGGCC	0	0	4	0	3 cited not expressed	Yes	fn-111	mb-00011	ax-1001011	ku-01	ss-101111101100
PID0510	Lin2016-hq	Rhsol	Rhi-milR-96		SRR1994877	6052857	3.96507	24	23	0.958333	UAAAGUAGUAGAGACCUUGGCCG	UGCCUUGCGCUUCUCACUACC	UAAAGUAGUAGAGACCUUGGCC	0	0	2	0	3 cited not expressed	No	fn-011	mb-00011	ax-1001011	ku-01	ss-111111101100
PID0510	Lin2016-hq	Rhsol	Rhi-milR-96		SRR1994875	4270606	2.80991	12	10	0.833333	UAAAGUAGUAGAGACCUUGGCCG	UGCCUUGCGCUUCUCACUACC	UAAAGUAGUAGAGACCUUGGCC	0	0	3	0	3 cited not expressed	Yes	fn-111	mb-00011	ax-1001011	ku-01	ss-101111101100
PID0510	Lin2016-hq	Rhsol	Rhi-milR-96		SRR1994874	9302637	2.9024	27	21	0.777778	UAAAGUAGUAGAGACCUUGGCCG	UGCCUUGCGCUUCUCACUACC	UAAAGUAGUAGAGACCUUGGCC	0	0	2	0	3 cited not expressed	No	fn-101	mb-00011	ax-1001011	ku-01	ss-111110101100
PID0510	Lin2016-hq	Rhsol	Rhi-milR-96		SRR1994872	9065193	0.772184	7	7	1	UAAAGUAGUAGAGACCUUGGC	CUUGCGCUUCUCACUACC	UAAAGUAGUAGAGACCUUGGCC	0	0	2	0	3 cited not expressed	No	fn-011	mb-00011	ax-1001011	ku-01	ss-111111101100
PID0510	Lin2016-hq	Rhsol	Rhi-milR-96		SRR1994873	8626632	2.78208	24	11	0.458333	UAAAGUAGUAGAGACCUUGGCCGUG	CUUGCCUUGCGCUUCUCACUACC	UAAAGUAGUAGAGACCUUGGCC	0	0	2	0	3 cited not expressed	No	fn-001	mb-00011	ax-1001001	ku-01	ss-111010001100
PID0511	Lin2016-hq	Rhsol	Rhi-milR-3		SRR1994872	9065193	8.82496	80	65	0.8125	AAAAGGCUGCUCAGAUCAAGAAAC	UUUUUCAUUGAGCUAUGUCUA	AAAGGCUGCUCAGAUCAAGAAAC	3	0	17	0	2 cited is not ma	Yes	fn-111	mb-00011	ax-1001011	ku-01	ss-111111101100
PID0511	Lin2016-hq	Rhsol	Rhi-milR-3		SRR1994876	6833927	6.87745	47	41	0.87234	AAAAGGCUGCUCAGAUCAAGAAAC	UUUUUCAUUGAGCUAUGUCUA	AAAGGCUGCUCAGAUCAAGAAAC	3	0	10	0	2 cited is not ma	Yes	fn-111	mb-00011	ax-1001011	ku-01	ss-111111101100
PID0511	Lin2016-hq	Rhsol	Rhi-milR-3		SRR1994874	9302637	10.2122	95	78	0.821053	AAAAGGCUGCUCAGAUCAAGAAAC	UUUUUCAUUGAGCUAUGUCUA	AAAGGCUGCUCAGAUCAAGAAAC	5	0	18	0	2 cited is not ma	Yes	fn-111	mb-00011	ax-1001011	ku-01	ss-111111101100
PID0511	Lin2016-hq	Rhsol	Rhi-milR-3		SRR1994877	6052857	12.7213	77	69	0.896104	AAAAGGCUGCUCAGAUCAAGAAAC	UUUUUCAUUGAGCUAUGUCUA	AAAGGCUGCUCAGAUCAAGAAAC	8	0	15	0	2 cited is not ma	Yes	fn-111	mb-00011	ax-1001011	ku-01	ss-111111101100
PID0511	Lin2016-hq	Rhsol	Rhi-milR-3		SRR1994875	4270606	3.51238	15	11	0.733333	AAAAGGCUGCUCAGAUCAAGAAAC	UUUUUCAUUGAGCUAUGUCUA	AAAGGCUGCUCAGAUCAAGAAAC	0	0	3	0	3 cited not expressed	No	fn-101	mb-00011	ax-1001011	ku-01	ss-111110101100
PID0511	Lin2016-hq	Rhsol	Rhi-milR-3		SRR1994873	8626632	8.11441	70	58	0.828571	UGAAAAGGCUGCUCAGAUCAAGAA	UUUCAUUGAGCUAUGUCUAGU	AAAGGCUGCUCAGAUCAAGAAAC	6	0	11	0	2 cited is not ma	Yes	fn-111	mb-01011	ax-1001011	ku-01	ss-111111101100
PID0511	Lin2016-hq	Rhsol	Rhi-milR-3		SRR1994871	8692379	5.98225	52	44	0.846154	AAAGGCUGCUCAGAUCAAGAAAC	UUUUUCAUUGAGCUAUGUCUAGUA	AAAGGCUGCUCAGAUCAAGAAAC	7	0	7	0	1 cited is ma	Yes	fn-111	mb-01011	ax-1001011	ku-01	ss-111111101100
PID0512	Lin2016-hq	Rhsol	Rhi-milR-116		SRR1994873	8626632	1.97064	17	16	0.941176	UAUUUGCAGCGCUGGACUCUUGG	GUGAUGCUCGUGCUGCGGCGCU	UAUUUGCAGCGCUGGACUCUUGG	4	0	4	0	1 cited is ma	Yes	fn-111	mb-01111	ax-1001011	ku-01	ss-111111101100
PID0512	Lin2016-hq	Rhsol	Rhi-milR-116		SRR1994876	6833927	2.92658	20	20	1	UAUUUGCAGCGCUGGACUCUUGG	GUGAUGCUCGUGCUGCGGCGCU	UAUUUGCAGCGCUGGACUCUUGG	3	0	3	0	1 cited is ma	Yes	fn-111	mb-01011	ax-1001011	ku-01	ss-111111101100
PID0512	Lin2016-hq	Rhsol	Rhi-milR-116		SRR1994875	4270606	2.10743	9	9	1	UAUUUGCAGCGCUGGACUCUUGG	GUGAUGCUCGUGCUGCGGCGCU	UAUUUGCAGCGCUGGACUCUUGG	2	0	2	0	1 cited is ma	No	fn-011	mb-01011	ax-1001011	ku-01	ss-111111101100
PID0512	Lin2016-hq	Rhsol	Rhi-milR-116		SRR1994871	8692379	2.87608	25	22	0.88	UAUUUGCAGCGCUGGACUCUUGG	GUGAUGCUCGUGCUGCGGCGCU	UAUUUGCAGCGCUGGACUCUUGG	5	0	5	0	1 cited is ma	Yes	fn-111	mb-01011	ax-1001011	ku-01	ss-111111101100
PID0512	Lin2016-hq	Rhsol	Rhi-milR-116		SRR1994874	9302637	1.82744	17	17	1	UAUUUGCAGCGCUGGACUCUUGG	GUGAUGCUCGUGCUGCGGCGCU	UAUUUGCAGCGCUGGACUCUUGG	4	0	4	0	1 cited is ma	No	fn-011	mb-01011	ax-1001011	ku-01	ss-111111101100
PID0512	Lin2016-hq	Rhsol	Rhi-milR-116		SRR1994877	6052857	2.64338	16	14	0.875	UAUUUGCAGCGCUGGACUCUUGG	GUGAUGCUCGUGCUGCGGCGCU	UAUUUGCAGCGCUGGACUCUUGG	4	0	4	0	1 cited is ma	Yes	fn-111	mb-01011	ax-1001011	ku-01	ss-101111101100
PID0512	Lin2016-hq	Rhsol	Rhi-milR-116		SRR1994872	9065193	0.992808	9	9	1	UGUCUUGAGCUGGACUUUACUGGC	GUGAUGCUCGUGCUGCGGCGCU	UAUUUGCAGCGCUGGACUCUUGG	1	0	3	0	2 cited is not ma	No	fn-011	mb-00110	ax-1001011	ku-01	ss-111111101100
PID0513	Lin2016-hq	Rhsol	Rhi-milR-47		SRR1994871	8692379	15.0707	131	108	0.824427	UGGAUCCGUAGGUGUUGGC	CAAGCUACUGUGGAUCCGUAG	CAUGGAUCCGUAGGUGUUGGCGC	5	0	13	0	2 cited is not ma	Yes	fn-111	mb-01011	ax-1011001	ku-01	ss-111011111100
PID0513	Lin2016-hq	Rhsol	Rhi-milR-47		SRR1994872	9065193	4.19186	38	25	0.657895	CAUGGAUCCGUAGGUGUUGGCGC	GCCAAGCUACUGUGGAUCCGUAGCC	CAUGGAUCCGUAGGUGUUGGCGC	4	0	4	0	1 cited is ma	No	fn-101	mb-01011	ax-1011011	ku-01	ss-111110111100
PID0513	Lin2016-hq	Rhsol	Rhi-milR-47		SRR1994876	6833927	6.58479	45	36	0.8	CAUGGAUCCGUAGGUGUUGGCGC	GCCAAGCUACUGUGGAUCCGUAGCC	CAUGGAUCCGUAGGUGUUGGCGC	6	0	6	0	1 cited is ma	No	fn-101	mb-01011	ax-1011011	ku-01	ss-111110111100
PID0513	Lin2016-hq	Rhsol	Rhi-milR-47		SRR1994875	4270606	10.5371	45	32	0.711111	CAUGGAUCCGUAGGUGUUGGCGC	GCCAAGCUACUGUGGAUCCGUAGCC	CAUGGAUCCGUAGGUGUUGGCGC	5	0	5	0	1 cited is ma	No	fn-101	mb-01011	ax-1011011	ku-01	ss-111110111100
PID0513	Lin2016-hq	Rhsol	Rhi-milR-47		SRR1994873	8626632	8.92585	77	53	0.688312	CAUGGAUCCGUAGGUGUUGGCGC	GCCAAGCUACUGUGGAUCCGUAGCC	CAUGGAUCCGUAGGUGUUGGCGC	10	0	10	0	1 cited is ma	No	fn-101	mb-01011	ax-1011011	ku-01	ss-111110111100
PID0513	Lin2016-hq	Rhsol	Rhi-milR-47		SRR1994874	9302637	9.13719	85	59	0.694118	CAUGGAUCCGUAGGUGUUGGCGC	GCCAAGCUACUGUGGAUCCGUAGCC	CAUGGAUCCGUAGGUGUUGGCGC	14	0	14	0	1 cited is ma	No	fn-101	mb-01011	ax-1011011	ku-01	ss-111110111100
PID0513	Lin2016-hq	Rhsol	Rhi-milR-47		SRR1994877	6052857	11.73	71	51	0.71831	CAUGGAUCCGUAGGUGUUGGCGC	GCCAAGCUACUGUGGAUCCGUAGCC	CAUGGAUCCGUAGGUGUUGGCGC	12	0	12	0	1 cited is ma	No	fn-101	mb-01011	ax-1011011	ku-01	ss-111110111100
PID0514	Lin2016-hq	Rhsol	Rhi-milR-122		SRR1994871	8692379	46.4775	404	396	0.980198	UUGGAAGUGGGGAUGAAGUGG	AUUGUGUCCCUGGGACUUGGG	UCUUGGAAGUGGGGAUGAAGUGGC	15	0	48	1	2 cited is not ma	Yes	fn-111	mb-01011	ax-1101011	ku-01	ss-111111101101
PID0514	Lin2016-hq	Rhsol	Rhi-milR-122		SRR1994874	9302637	12.4696	116	113	0.974138	UUGGAAGUGGGGAUGAAGUGG	AUUGUGUCCCUGGGACUUGGG	UCUUGGAAGUGGGGAUGAAGUGGC	1	0	11	1	2 cited is not ma	Yes	fn-111	mb-01011	ax-1101011	ku-01	ss-111111101101
PID0514	Lin2016-hq	Rhsol	Rhi-milR-122		SRR1994872	9065193	4.96404	45	44	0.977778	UUGGAAGUGGGGAUGAAGUGG	AUUGUGUCCCUGGGACUUGGG	UCUUGGAAGUGGGGAUGAAGUGGC	1	0	8	0	2 cited is not ma	Yes	fn-111	mb-01111	ax-1001011	ku-01	ss-111111101100
PID0514	Lin2016-hq	Rhsol	Rhi-milR-122		SRR1994875	4270606	22.7134	97	95	0.979381	UGGAAGUGGGGAUGAAGUGGCC	GCAUUGUGUCCCUGGGACUUGG	UCUUGGAAGUGGGGAUGAAGUGGC	2	0	10	0	2 cited is not ma	Yes	fn-111	mb-01010	ax-1001011	ku-01	ss-111111101100
PID0514	Lin2016-hq	Rhsol	Rhi-milR-122		SRR1994873	8626632	7.30297	63	63	1	UGGAAGUGGGGAUGAAGUGGCC	GCAUUGUGUCCCUGGGACUUGG	UCUUGGAAGUGGGGAUGAAGUGGC	0	0	8	0	3 cited not expressed	Yes	fn-111	mb-01010	ax-1001011	ku-01	ss-111111101100
PID0514	Lin2016-hq	Rhsol	Rhi-milR-122		SRR1994876	6833927	13.9012	95	93	0.978947	UUGGAAGUGGGGAUGAAGUGGC	CAUUGUGUCCCUGGGACUUGGG	UCUUGGAAGUGGGGAUGAAGUGGC	2	0	8	4	2 cited is not ma	Yes	fn-111	mb-01011	ax-1101011	ku-01	ss-111111101101
PID0514	Lin2016-hq	Rhsol	Rhi-milR-122		SRR1994877	6052857	10.4083	63	63	1	UUGGAAGUGGGGAUGAAGUGGCC	GCAUUGUGUCCCUGGGACUUGGG	UCUUGGAAGUGGGGAUGAAGUGGC	0	0	6	0	3 cited not expressed	Yes	fn-111	mb-01011	ax-1001011	ku-01	ss-111111101100
PID0515	Lin2016-hq	Rhsol	Rhi-milR-80		SRR1994875	4270606	25.055	107	107	1	GGGCGUAUGGUGUAG	GUUGCCGUGUGUUCUA	GGCGUAUGGUGUAGUGGUAUC	0	0	26	0	3 cited not expressed	Yes	fn-111	mb-01011	ax-1011001	ku-01	ss-101011111100
PID0515	Lin2016-hq	Rhsol	Rhi-milR-80		SRR1994873	8626632	27.2412	235	234	0.995745	GGGCGUAUGGUGUAG	GUUGCCGUGUGUUCUA	GGCGUAUGGUGUAGUGGUAUC	0	0	76	0	3 cited not expressed	Yes	fn-111	mb-01011	ax-1011001	ku-01	ss-101011111100
PID0515	Lin2016-hq	Rhsol	Rhi-milR-80		SRR1994871	8692379	12.6548	110	110	1	GGGCGUAUGGUGUAGUGGU	CAUAGUUGCCGUGUGUUCUA	GGCGUAUGGUGUAGUGGUAUC	0	0	37	0	3 cited not expressed	Yes	fn-111	mb-01011	ax-1011001	ku-01	ss-101011111100
PID0515	Lin2016-hq	Rhsol	Rhi-milR-80		SRR1994877	6052857	5.45197	33	33	1	GGGCGUAUGGUGUAGUGGU	CAUAGUUGCCGUGUGUUCUA	GGCGUAUGGUGUAGUGGUAUC	0	0	9	0	3 cited not expressed	Yes	fn-111	mb-01011	ax-1011001	ku-01	ss-101011111100
PID0515	Lin2016-hq	Rhsol	Rhi-milR-80		SRR1994872	9065193	21.5108	195	195	1	GGGCGUAUGGUGUAGUGG	AUAGUUGCCGUGUGUUCUA	GGCGUAUGGUGUAGUGGUAUC	0	0	33	0	3 cited not expressed	Yes	fn-111	mb-01011	ax-1011001	ku-01	ss-101011111100
PID0515	Lin2016-hq	Rhsol	Rhi-milR-80		SRR1994876	6833927	5.56049	38	38	1	GGGCGUAUGGUGUAGUGGUAUC	UUCCAUAGUUGCCGUGUGUUCUA	GGCGUAUGGUGUAGUGGUAUC	0	0	9	0	3 cited not expressed	Yes	fn-111	mb-01011	ax-1001011	ku-01	ss-101111101100
PID0515	Lin2016-hq	Rhsol	Rhi-milR-80		SRR1994874	9302637	15.587	145	145	1	GGGCGUAUGGUGUAGUGGUAUCA	UUUCCAUAGUUGCCGUGUGUUCUA	GGCGUAUGGUGUAGUGGUAUC	0	0	24	0	3 cited not expressed	Yes	fn-111	mb-01011	ax-1001011	ku-01	ss-101111101100
PID0516	Lin2016-hq	Rhsol	Rhi-milR-168		SRR1994873	8626632	16.5766	143	143	1	UUGGCUUGAAUAUCUUGGUGAUGGA	ACGUUCCAAGUUCAUUCUUUCU	UUGGCUUGAAUAUCUUGGUGAUGG	8	0	24	0	2 cited is not ma	Yes	fn-111	mb-01011	ax-1001001	ku-01	ss-101011101110
PID0516	Lin2016-hq	Rhsol	Rhi-milR-168		SRR1994871	8692379	28.3007	246	246	1	UUGGCUUGAAUAUCUUGGUGAUGGA	ACGUUCCAAGUUCAUUCUUUCU	UUGGCUUGAAUAUCUUGGUGAUGG	14	0	48	0	2 cited is not ma	Yes	fn-111	mb-01011	ax-1001001	ku-01	ss-101011101110
PID0516	Lin2016-hq	Rhsol	Rhi-milR-168		SRR1994874	9302637	12.7921	119	119	1	UUGGCUUGAAUAUCUUGGUGAUGGA	ACGUUCCAAGUUCAUUCUUUCU	UUGGCUUGAAUAUCUUGGUGAUGG	13	0	21	0	2 cited is not ma	Yes	fn-111	mb-01011	ax-1001001	ku-01	ss-101011101110
PID0516	Lin2016-hq	Rhsol	Rhi-milR-168		SRR1994876	6833927	6.29214	43	43	1	UUGGCUUGAAUAUCUUGGUGAUGGA	ACGUUCCAAGUUCAUUCUUUCU	UUGGCUUGAAUAUCUUGGUGAUGG	3	0	6	0	2 cited is not ma	Yes	fn-111	mb-01011	ax-1001001	ku-01	ss-101011101100
PID0516	Lin2016-hq	Rhsol	Rhi-milR-168		SRR1994872	9065193	33.8658	307	307	1	UUGGCUUGAAUAUCUUGGUGAUGGAG	GACGUUCCAAGUUCAUUCUUUCU	UUGGCUUGAAUAUCUUGGUGAUGG	16	0	74	0	2 cited is not ma	Yes	fn-111	mb-01011	ax-1001001	ku-01	ss-101011101110
PID0516	Lin2016-hq	Rhsol	Rhi-milR-168		SRR1994875	4270606	2.10743	9	9	1	UUUGGCUUGAAUAUCUUGGUGAUGGA	ACGUUCCAAGUUCAUUCUUUCUA	UUGGCUUGAAUAUCUUGGUGAUGG	0	0	2	0	3 cited not expressed	Yes	fn-111	mb-01011	ax-1001001	ku-01	ss-101011101110
PID0516	Lin2016-hq	Rhsol	Rhi-milR-168		SRR1994877	6052857	6.93887	42	42	1	UUGGCUUGAAUAUCUUGGUGAUG	UUCCAAGUUCAUUCUUUCU	UUGGCUUGAAUAUCUUGGUGAUGG	2	0	6	0	2 cited is not ma	Yes	fn-111	mb-01011	ax-1001011	ku-01	ss-101111101000
PID0517	Lin2016-hq	Rhsol	Rhi-milR-10		SRR1994872	9065193	13.5684	123	123	1	ACCAGACUGCAGCAUCCUCGC	CCGGAUUGCUUCAUCUGGUAA	ACCAGACUGCAGCAUCCUCGCC	0	0	36	0	3 cited not expressed	Yes	fn-111	mb-01111	ax-1001011	ku-01	ss-101111101100
PID0517	Lin2016-hq	Rhsol	Rhi-milR-10		SRR1994874	9302637	2.57991	24	24	1	ACCAGACUGCAGCAUCCUCGC	CCGGAUUGCUUCAUCUGGUAA	ACCAGACUGCAGCAUCCUCGCC	1	0	9	0	2 cited is not ma	Yes	fn-111	mb-01111	ax-1001011	ku-01	ss-101111101100
PID0517	Lin2016-hq	Rhsol	Rhi-milR-10		SRR1994873	8626632	7.07113	61	61	1	ACCAGACUGCAGCAUCCUCGC	CCGGAUUGCUUCAUCUGGUAA	ACCAGACUGCAGCAUCCUCGCC	3	0	15	0	2 cited is not ma	Yes	fn-111	mb-01011	ax-1001011	ku-01	ss-101111101100
PID0517	Lin2016-hq	Rhsol	Rhi-milR-10		SRR1994871	8692379	3.22121	28	28	1	ACCAGACUGCAGCAUCCUCGC	CCGGAUUGCUUCAUCUGGUAA	ACCAGACUGCAGCAUCCUCGCC	3	0	6	0	2 cited is not ma	Yes	fn-111	mb-01011	ax-1001011	ku-01	ss-101111101100
PID0517	Lin2016-hq	Rhsol	Rhi-milR-10		SRR1994876	6833927	1.60962	11	11	1	ACCAGACUGCAGCAUCCUCGCC	CCCGGAUUGCUUCAUCUGGUAA	ACCAGACUGCAGCAUCCUCGCC	2	0	2	0	1 cited is ma	Yes	fn-111	mb-01111	ax-1001011	ku-01	ss-111111101110
PID0517	Lin2016-hq	Rhsol	Rhi-milR-10		SRR1994877	6052857	0.991267	6	6	1	CCAGACUGCAGCAUCCUCGCCC	GCCCGGAUUGCUUCAUCUGGUA	ACCAGACUGCAGCAUCCUCGCC	0	0	2	0	3 cited not expressed	No	fn-011	mb-01011	ax-1011011	ku-01	ss-101111101100
PID0517	Lin2016-hq	Rhsol	Rhi-milR-10		SRR1994875	4270606	0.936635	4	4	1	UCACCGACGGCCCGGAUUGCU	CAUCCUCGCCCUCAUCUACA	ACCAGACUGCAGCAUCCUCGCC	0	0	1	0	3 cited not expressed	No	fn-011	mb-01110	ax-1001011	ku-01	ss-100111101100
PID0518	Lin2016-hq	Rhsol	Rhi-milR-43		SRR1994872	9065193	7.2806	66	66	1	GCAGAGUGGAUUUGUAUUGCU	CAAUAUUAUCCAUCUGCCC	CAGAGUGGAUUUGUAUUGCU	5	0	16	0	2 cited is not ma	Yes	fn-111	mb-01011	ax-1011011	ku-01	ss-101111111110
PID0518	Lin2016-hq	Rhsol	Rhi-milR-43		SRR1994873	8626632	4.0572	35	35	1	GCAGAGUGGAUUUGUAUUGCU	CAAUAUUAUCCAUCUGCCC	CAGAGUGGAUUUGUAUUGCU	2	0	17	0	2 cited is not ma	Yes	fn-111	mb-01011	ax-1011011	ku-01	ss-101111111110
PID0518	Lin2016-hq	Rhsol	Rhi-milR-43		SRR1994876	6833927	2.19493	15	15	1	UGCAGAGUGGAUUUGUAUUGCUU	GCAAUAUUAUCCAUCUGCCCUUUUUAAUUAGUCUUC	CAGAGUGGAUUUGUAUUGCU	0	0	4	0	3 cited not expressed	Yes	fn-111	mb-00010	ax-1001011	ku-01	ss-101111101010
PID0518	Lin2016-hq	Rhsol	Rhi-milR-43		SRR1994877	6052857	0.495634	3	3	1	UGCAGAGUGGAUUUGUAUUGCUU	GCAAUAUUAUCCAUCUGCCCUUUUUAAUUAGUCUUC	CAGAGUGGAUUUGUAUUGCU	0	0	1	0	3 cited not expressed	No	fn-011	mb-00010	ax-1001011	ku-01	ss-110111101000
PID0518	Lin2016-hq	Rhsol	Rhi-milR-43		SRR1994875	4270606	1.40495	6	6	1	UGCAGAGUGGAUUUGUAUUGCUU	GCAAUAUUAUCCAUCUGCCCUUUUUAAUUAGUCUUC	CAGAGUGGAUUUGUAUUGCU	0	0	1	0	3 cited not expressed	Yes	fn-111	mb-00010	ax-1001011	ku-01	ss-100111101000
PID0518	Lin2016-hq	Rhsol	Rhi-milR-43		SRR1994874	9302637	0.859971	8	8	1	CAGAGUGGAUUUGUAUUGCU	CAAUAUUAUCCAUCUGCC	CAGAGUGGAUUUGUAUUGCU	2	0	2	0	1 cited is ma	Yes	fn-111	mb-01011	ax-1011111	ku-01	ss-101111111110
PID0518	Lin2016-hq	Rhsol	Rhi-milR-43		SRR1994871	8692379	1.95574	17	17	1	UGCAGAGUGGAUUUGUAUUGCU	CAAUAUUAUCCAUCUGCCCUUUUUAAUUAGUCUUC	CAGAGUGGAUUUGUAUUGCU	0	0	3	0	3 cited not expressed	Yes	fn-111	mb-00010	ax-1001011	ku-01	ss-101111101000
PID0519	Lin2016-hq	Rhsol	Rhi-milR-9		SRR1994872	9065193	19.7459	179	28	0.156425	UACAAUGUGGUCAAGGUCUCUGC	AGACCCUUUGGUGUUCAUUGUGCU	ACAAUGUGGUCAAGGUCUCUG	0	0	5	0	3 cited not expressed	No	fn-101	mb-01111	ax-1001011	ku-01	ss-101111001100
PID0519	Lin2016-hq	Rhsol	Rhi-milR-9		SRR1994871	8692379	15.991	139	14	0.100719	UACAAUGUGGUCAAGGUCUCUGC	AGACCCUUUGGUGUUCAUUGUGCU	ACAAUGUGGUCAAGGUCUCUG	0	0	4	0	3 cited not expressed	No	fn-101	mb-01111	ax-1001011	ku-01	ss-101111001100
PID0519	Lin2016-hq	Rhsol	Rhi-milR-9		SRR1994874	9302637	32.6789	304	29	0.0953947	UACAAUGUGGUCAAGGUCUCUG	GACCCUUUGGUGUUCAUUGUGCU	ACAAUGUGGUCAAGGUCUCUG	1	0	7	0	2 cited is not ma	No	fn-101	mb-01111	ax-1001011	ku-01	ss-101111001100
PID0519	Lin2016-hq	Rhsol	Rhi-milR-9		SRR1994877	6052857	51.7111	313	26	0.0830671	UACAAUGUGGUCAAGGUCUCUGC	AGACCCUUUGGUGUUCAUUGUGCU	ACAAUGUGGUCAAGGUCUCUG	0	0	8	0	3 cited not expressed	No	fn-101	mb-01111	ax-1001011	ku-01	ss-101111001100
PID0519	Lin2016-hq	Rhsol	Rhi-milR-9		SRR1994876	6833927	22.9736	157	9	0.0573248	UACAAUGUGGUCAAGGUCUCUGC	AGACCCUUUGGUGUUCAUUGUGCU	ACAAUGUGGUCAAGGUCUCUG	0	0	3	0	3 cited not expressed	No	fn-101	mb-01011	ax-1001011	ku-01	ss-101111001100
PID0519	Lin2016-hq	Rhsol	Rhi-milR-9		SRR1994875	4270606	18.4985	79	6	0.0759494	UACAAUGUGGUCAAGGUCUCUGC	AGACCCUUUGGUGUUCAUUGUGCU	ACAAUGUGGUCAAGGUCUCUG	0	0	4	0	3 cited not expressed	No	fn-101	mb-01011	ax-1001011	ku-01	ss-101111001100
PID0519	Lin2016-hq	Rhsol	Rhi-milR-9		SRR1994873	8626632	31.878	275	22	0.08	UACAAUGUGGUCAAGGUCUCUGC	AGACCCUUUGGUGUUCAUUGUGCU	ACAAUGUGGUCAAGGUCUCUG	0	0	7	0	3 cited not expressed	No	fn-101	mb-01011	ax-1001011	ku-01	ss-101111001100
PID0520	Lin2016-hq	Rhsol	Rhi-milR-72		SRR1994873	8626632	0.46368	4	3	0.75	AGGCAAAAUCUGGAAGAAGGCAA	GCCUUCCACUCAUAGAUCUCCCCACUC	GCAGGCAAAAUCUGGAAGAAGGC	0	0	1	0	3 cited not expressed	No	fn-001	mb-01111	ax-1001011	ku-01	ss-110110101000
PID0520	Lin2016-hq	Rhsol	Rhi-milR-72		SRR1994872	9065193	0.661872	6	0	0	GCAGGCAAAAUCUGGAAGAAGGC	CUUCCACUCAUAGAUCUCCCCACUCCU	GCAGGCAAAAUCUGGAAGAAGGC	0	0	0	0	3 cited not expressed	No	fn-001	mb-01011	ax-1001011	ku-01	ss-110111001000
PID0520	Lin2016-hq	Rhsol	Rhi-milR-72		SRR1994875	4270606	0.702476	3	0	0	GCAGGCAAAAUCUGGAAGAAGGC	CUUCCACUCAUAGAUCUCCCCACUCCU	GCAGGCAAAAUCUGGAAGAAGGC	0	0	0	0	3 cited not expressed	No	fn-001	mb-01011	ax-1001011	ku-01	ss-110111001000
PID0520	Lin2016-hq	Rhsol	Rhi-milR-72		SRR1994871	8692379	0.460173	4	0	0	GCAGGCAAAAUCUGGAAGAAGGC	CUUCCACUCAUAGAUCUCCCCACUCCU	GCAGGCAAAAUCUGGAAGAAGGC	0	0	0	0	3 cited not expressed	No	fn-001	mb-01011	ax-1001011	ku-01	ss-110111001000
PID0520	Lin2016-hq	Rhsol	Rhi-milR-72		SRR1994877	6052857	1.15648	7	4	0.571429	CAGGCAAAAUCUGGAAGAAGGCAA	GCCUUCCACUCAUAGAUCUCCCCACUCC	GCAGGCAAAAUCUGGAAGAAGGC	0	0	1	0	3 cited not expressed	No	fn-001	mb-01011	ax-1001011	ku-01	ss-110110101000
PID0520	Lin2016-hq	Rhsol	Rhi-milR-72		SRR1994876	6833927	1.0243	7	2	0.285714	AGGCAGGCAAAAUCUGGAAGAAG	UCCACUCAUAGAUCUCCCCACUCCUUG	GCAGGCAAAAUCUGGAAGAAGGC	0	0	1	0	3 cited not expressed	No	fn-001	mb-01010	ax-1001011	ku-01	ss-110110001000
PID0520	Lin2016-hq	Rhsol	Rhi-milR-72		SRR1994874	9302637	0.429986	4	1	0.25	CAGGCAAAAUCUGGAAGAAGGCAA	GCCUUCCACUCAUAGAUCUCCCCACUCC	GCAGGCAAAAUCUGGAAGAAGGC	0	0	1	0	3 cited not expressed	No	fn-001	mb-01011	ax-1001011	ku-01	ss-100110001000
PID0521	Lin2016-hq	Rhsol	Rhi-milR-139		SRR1994877	6052857	41.468	251	35	0.139442	UCUGUCAUGCUGUAGAGGGGUG	AUGCCAAUAUCAUAGUGCCAGUG	UGGCAUCUGUCAUGCUGUAGAGGG	0	0	4	0	3 cited not expressed	No	fn-101	mb-01011	ax-1001011	ku-01	ss-111111001100
PID0521	Lin2016-hq	Rhsol	Rhi-milR-139		SRR1994872	9065193	22.7243	206	58	0.281553	UCUGUCAUGCUGUAGAGGGGU	GCCAAUAUCAUAGUGCCAGUG	UGGCAUCUGUCAUGCUGUAGAGGG	1	0	5	0	2 cited is not ma	No	fn-101	mb-01011	ax-1001011	ku-01	ss-111110001100
PID0521	Lin2016-hq	Rhsol	Rhi-milR-139		SRR1994876	6833927	20.486	140	32	0.228571	UCUGUCAUGCUGUAGAGGGGU	GCCAAUAUCAUAGUGCCAGUG	UGGCAUCUGUCAUGCUGUAGAGGG	1	0	3	0	2 cited is not ma	No	fn-101	mb-01011	ax-1001011	ku-01	ss-111110001100
PID0521	Lin2016-hq	Rhsol	Rhi-milR-139		SRR1994875	4270606	11.9421	51	11	0.215686	UCUGUCAUGCUGUAGAGGGGU	GCCAAUAUCAUAGUGCCAGUG	UGGCAUCUGUCAUGCUGUAGAGGG	0	0	2	0	3 cited not expressed	No	fn-001	mb-01011	ax-1001011	ku-01	ss-111110001100
PID0521	Lin2016-hq	Rhsol	Rhi-milR-139		SRR1994873	8626632	24.8069	214	57	0.266355	UGGCAUCUGUCAUGCUGUAGAGG	AAUAUCAUAGUGCCAGUGCUGAG	UGGCAUCUGUCAUGCUGUAGAGGG	2	0	5	0	2 cited is not ma	No	fn-101	mb-01011	ax-1001011	ku-01	ss-111110001100
PID0521	Lin2016-hq	Rhsol	Rhi-milR-139		SRR1994871	8692379	24.3892	212	56	0.264151	UCUGUCAUGCUGUAGAGGGGU	GCCAAUAUCAUAGUGCCAGUG	UGGCAUCUGUCAUGCUGUAGAGGG	2	0	6	0	2 cited is not ma	No	fn-101	mb-01011	ax-1001011	ku-01	ss-111110001100
PID0521	Lin2016-hq	Rhsol	Rhi-milR-139		SRR1994874	9302637	19.5643	182	49	0.269231	UCUGUCAUGCUGUAGAGGGGUG	AUGCCAAUAUCAUAGUGCCAGUG	UGGCAUCUGUCAUGCUGUAGAGGG	0	0	4	0	3 cited not expressed	No	fn-101	mb-01011	ax-1001011	ku-01	ss-111110001100
PID0522	Lin2016-hq	Rhsol	Rhi-milR-4		SRR1994876	6833927	0.877973	6	6	1	ACAGAUUGCCACAAGGGAGAGGC	CACCCUUUGUGGCCAAUUUGCAA	AACAGAUUGCCACAAGGGAGAGG	1	0	2	0	2 cited is not ma	No	fn-011	mb-01111	ax-1011011	ku-01	ss-111111111100
PID0522	Lin2016-hq	Rhsol	Rhi-milR-4		SRR1994874	9302637	0.107496	1	1	1	ACAGAUUGCCACAAGGGAGA	CCUUUGUGGCCAAUUUGCAA	AACAGAUUGCCACAAGGGAGAGG	0	0	1	0	3 cited not expressed	No	fn-011	mb-01011	ax-1011111	ku-01	ss-110111111110
PID0522	Lin2016-hq	Rhsol	Rhi-milR-4		SRR1994875	4270606	0.234159	1	1	1	AACAGAUUGCCACAAGGGAGAGG	ACCCUUUGUGGCCAAUUUGCAAG	AACAGAUUGCCACAAGGGAGAGG	0	0	0	0	3 cited not expressed	No	fn-011	mb-01011	ax-1011011	ku-01	ss-110111111100
PID0522	Lin2016-hq	Rhsol	Rhi-milR-4		SRR1994873	8626632	0.34776	3	2	0.666667	AACAGAUUGCCACAAGGGAGAGG	ACCCUUUGUGGCCAAUUUGCAAG	AACAGAUUGCCACAAGGGAGAGG	0	0	0	0	3 cited not expressed	No	fn-001	mb-01011	ax-1011011	ku-01	ss-110110111100
PID0522	Lin2016-hq	Rhsol	Rhi-milR-4		SRR1994871	8692379	0.230087	2	2	1	AACAGAUUGCCACAAGGGAGAGG	ACCCUUUGUGGCCAAUUUGCAAG	AACAGAUUGCCACAAGGGAGAGG	1	0	1	0	1 cited is ma	No	fn-011	mb-01011	ax-1001011	ku-01	ss-110111101100
PID0522	Lin2016-hq	Rhsol	Rhi-milR-4		SRR1994877	6052857	0.991267	6	6	1	AACAGAUUGCCACAAGGGAGAGG	ACCCUUUGUGGCCAAUUUGCAAG	AACAGAUUGCCACAAGGGAGAGG	1	0	1	0	1 cited is ma	No	fn-011	mb-01011	ax-1001011	ku-01	ss-110111101100
PID0522	Lin2016-hq	Rhsol	Rhi-milR-4		SRR1994872	9065193	0.220624	2	2	1	UUCACUGGGAGGUCUGGAAACAG	ACCCUUUGUGGCCAAUUUGCAAG	AACAGAUUGCCACAAGGGAGAGG	0	0	1	0	3 cited not expressed	No	fn-011	mb-00010	ax-1001011	ku-01	ss-110111101100
PID0523	Lin2016-hq	Rhsol	Rhi-milR-62		SRR1994876	6833927	0.877973	6	6	1	CCUGGAGUGUUGCGGCUUUGG	AGAGUUGGUAGCCACGGGAC	CUGGAGUGUUGCGGCUUUGG	0	0	4	0	3 cited not expressed	Yes	fn-111	mb-01011	ax-1001111	ku-01	ss-111111101110
PID0523	Lin2016-hq	Rhsol	Rhi-milR-62		SRR1994872	9065193	4.19186	38	38	1	CCUGGAGUGUUGCGGCUUUGG	AGAGUUGGUAGCCACGGGAC	CUGGAGUGUUGCGGCUUUGG	1	0	20	0	2 cited is not ma	Yes	fn-111	mb-01111	ax-1001011	ku-01	ss-101111101110
PID0523	Lin2016-hq	Rhsol	Rhi-milR-62		SRR1994875	4270606	1.40495	6	6	1	CCUGGAGUGUUGCGGCUUUGG	AGAGUUGGUAGCCACGGGAC	CUGGAGUGUUGCGGCUUUGG	0	0	4	0	3 cited not expressed	Yes	fn-111	mb-01111	ax-1001011	ku-01	ss-101111101110
PID0523	Lin2016-hq	Rhsol	Rhi-milR-62		SRR1994873	8626632	3.82536	33	33	1	CCUGGAGUGUUGCGGCUUUGG	AGAGUUGGUAGCCACGGGAC	CUGGAGUGUUGCGGCUUUGG	0	0	12	0	3 cited not expressed	Yes	fn-111	mb-01111	ax-1001011	ku-01	ss-101111101100
PID0523	Lin2016-hq	Rhsol	Rhi-milR-62		SRR1994874	9302637	2.14993	20	20	1	CCUGGAGUGUUGCGGCUUUGG	AGAGUUGGUAGCCACGGGAC	CUGGAGUGUUGCGGCUUUGG	0	0	9	0	3 cited not expressed	Yes	fn-111	mb-01111	ax-1001011	ku-01	ss-101111101100
PID0523	Lin2016-hq	Rhsol	Rhi-milR-62		SRR1994877	6052857	3.63465	22	22	1	CCUGGAGUGUUGCGGCUUUG	GAGUUGGUAGCCACGGGAC	CUGGAGUGUUGCGGCUUUGG	0	0	5	0	3 cited not expressed	Yes	fn-111	mb-01111	ax-1001011	ku-01	ss-101111101100
PID0523	Lin2016-hq	Rhsol	Rhi-milR-62		SRR1994871	8692379	1.15043	10	10	1	UGUUGCGGCUUUGGGACUGU	AGAGUUGGUAGCCACGGGA	CUGGAGUGUUGCGGCUUUGG	0	0	2	0	3 cited not expressed	No	fn-011	mb-00010	ax-1001011	ku-01	ss-101111101100
PID0524	Lin2016-hq	Rhsol	Rhi-milR-162		SRR1994876	6833927	0.438986	3	3	1	UGAACGAAAAGUGGCUGGCAU	GCCAUGGCCACUCUUGGUUCUCC	UUGAACGAAAAGUGGCUGGCAU	0	0	2	0	3 cited not expressed	No	fn-011	mb-01011	ax-1011011	ku-01	ss-101111101110
PID0524	Lin2016-hq	Rhsol	Rhi-milR-162		SRR1994873	8626632	3.94128	34	34	1	UGAACGAAAAGUGGCUGGCAU	GCCAUGGCCACUCUUGGUUCUCC	UUGAACGAAAAGUGGCUGGCAU	0	0	7	0	3 cited not expressed	Yes	fn-111	mb-01011	ax-1011011	ku-01	ss-101111101110
PID0524	Lin2016-hq	Rhsol	Rhi-milR-162		SRR1994871	8692379	1.49556	13	13	1	UGAACGAAAAGUGGCUGGC	CAUGGCCACUCUUGGUUCUCC	UUGAACGAAAAGUGGCUGGCAU	0	0	4	0	3 cited not expressed	Yes	fn-111	mb-01011	ax-1011001	ku-01	ss-101011101110
PID0524	Lin2016-hq	Rhsol	Rhi-milR-162		SRR1994872	9065193	5.84654	53	53	1	UGAACGAAAAGUGGCUGGCAUUACC	UGGUGCCAUGGCCACUCUUGGUUCUCC	UUGAACGAAAAGUGGCUGGCAU	2	0	8	0	2 cited is not ma	Yes	fn-111	mb-01011	ax-1001001	ku-01	ss-101011101100
PID0524	Lin2016-hq	Rhsol	Rhi-milR-162		SRR1994877	6052857	0.165211	1	1	1	GUUGAACGAAAAGUGGCUGGC	CAUGGCCACUCUUGGUUCUCCAC	UUGAACGAAAAGUGGCUGGCAU	0	0	1	0	3 cited not expressed	No	fn-011	mb-01011	ax-1001111	ku-01	ss-110111101110
PID0524	Lin2016-hq	Rhsol	Rhi-milR-162		SRR1994875	4270606	0.468318	2	2	1	UGAACGAAAAGUGGCUGGCAUUAC	GGUGCCAUGGCCACUCUUGGUUCUCC	UUGAACGAAAAGUGGCUGGCAU	0	0	1	0	3 cited not expressed	No	fn-011	mb-01011	ax-1011011	ku-01	ss-110111101100
PID0524	Lin2016-hq	Rhsol	Rhi-milR-162		SRR1994874	9302637	0.859971	8	8	1	GUUGAACGAAAAGUGGCUGGCAU	GCCAUGGCCACUCUUGGUUCUCCAC	UUGAACGAAAAGUGGCUGGCAU	0	0	3	0	3 cited not expressed	No	fn-011	mb-01011	ax-1001011	ku-01	ss-101111101100
PID0525	Lin2016-hq	Rhsol	Rhi-milR-123		SRR1994871	8692379	2.646	23	23	1	UGUGAAAAAGGAAGCGUGCUGC	GGCACGGCAUCUUGGCAUAA	UGAAAAAGGAAGCGUGCUGCA	1	0	2	0	2 cited is not ma	Yes	fn-111	mb-01011	ax-1001011	ku-01	ss-111111101100
PID0525	Lin2016-hq	Rhsol	Rhi-milR-123		SRR1994877	6052857	2.80859	17	16	0.941176	UGUGAAAAAGGAAGCGUGCUGC	GGCACGGCAUCUUGGCAUAA	UGAAAAAGGAAGCGUGCUGCA	1	0	4	0	2 cited is not ma	Yes	fn-111	mb-01011	ax-1001011	ku-01	ss-111111101100
PID0525	Lin2016-hq	Rhsol	Rhi-milR-123		SRR1994874	9302637	2.57991	24	24	1	UGUGAAAAAGGAAGCGUGCUG	GCACGGCAUCUUGGCAUAA	UGAAAAAGGAAGCGUGCUGCA	1	0	4	0	2 cited is not ma	Yes	fn-111	mb-01011	ax-1011011	ku-01	ss-111111101100
PID0525	Lin2016-hq	Rhsol	Rhi-milR-123		SRR1994876	6833927	0.731644	5	5	1	UGAAAAAGGAAGCGUGCUGCA	UGGCACGGCAUCUUGGCAUA	UGAAAAAGGAAGCGUGCUGCA	3	0	3	0	1 cited is ma	No	fn-011	mb-01011	ax-1001011	ku-01	ss-111111101110
PID0525	Lin2016-hq	Rhsol	Rhi-milR-123		SRR1994872	9065193	2.31655	21	21	1	UGAAAAAGGAAGCGUGCUGCA	UGGCACGGCAUCUUGGCAUA	UGAAAAAGGAAGCGUGCUGCA	2	0	2	0	1 cited is ma	No	fn-011	mb-01011	ax-1001011	ku-01	ss-111111101100
PID0525	Lin2016-hq	Rhsol	Rhi-milR-123		SRR1994873	8626632	2.3184	20	20	1	UGAAAAAGGAAGCGUGCUGCA	UGGCACGGCAUCUUGGCAUA	UGAAAAAGGAAGCGUGCUGCA	2	0	2	0	1 cited is ma	No	fn-011	mb-01011	ax-1001011	ku-01	ss-111111101100
PID0525	Lin2016-hq	Rhsol	Rhi-milR-123		SRR1994875	4270606	0.702476	3	3	1	CUGCAGAUUGCGCUGGAGCGUGGA	CUAAGCGCACUUGGCACAGUAACUUGGCA	UGAAAAAGGAAGCGUGCUGCA	0	0	1	0	3 cited not expressed	No	fn-011	mb-01011	ax-1001011	ku-01	ss-100111101000
PID0527	Lin2016-hq	Rhsol	Rhi-milR-82		SRR1994872	9065193	10.1487	92	92	1	UGGGAUACCUGUAUGAAUUGGCGG	AGCCGAUUGGGCAAUCCCAG	GGGAUACCUGUAUGAAUUGG	0	0	18	0	3 cited not expressed	Yes	fn-111	mb-01111	ax-1011011	ku-01	ss-101111111000
PID0527	Lin2016-hq	Rhsol	Rhi-milR-82		SRR1994873	8626632	3.59352	31	31	1	CGUGGGAUACCUGUAUGAAUUGGCGG	AGCCGAUUGGGCAAUCCCAGAC	GGGAUACCUGUAUGAAUUGG	0	0	4	0	3 cited not expressed	Yes	fn-111	mb-01011	ax-1011001	ku-01	ss-101011111000
PID0527	Lin2016-hq	Rhsol	Rhi-milR-82		SRR1994874	9302637	1.50495	14	14	1	UGGGAUACCUGUAUGAAUUGGCGGAA	CCAGCCGAUUGGGCAAUCCCAG	GGGAUACCUGUAUGAAUUGG	0	0	3	0	3 cited not expressed	Yes	fn-111	mb-01011	ax-1001001	ku-01	ss-101011101000
PID0527	Lin2016-hq	Rhsol	Rhi-milR-82		SRR1994871	8692379	0.460173	4	4	1	UGGGAUACCUGUAUGAAUUGG	GAUUGGGCAAUCCCAG	GGGAUACCUGUAUGAAUUGG	0	0	3	0	3 cited not expressed	No	fn-011	mb-01011	ax-1011111	ku-01	ss-101111111010
PID0527	Lin2016-hq	Rhsol	Rhi-milR-82		SRR1994876	6833927	0.877973	6	6	1	GAUACCUGUAUGAAUUGGCGG	AGCCGAUUGGGCAAUCCC	GGGAUACCUGUAUGAAUUGG	0	0	2	0	3 cited not expressed	No	fn-011	mb-01011	ax-1011011	ku-01	ss-101111111100
PID0527	Lin2016-hq	Rhsol	Rhi-milR-82		SRR1994875	4270606	0	0	0	NA	GGGAUACCUGUAUGAAUUGG	GAUUGGGCAAUCCCAG	GGGAUACCUGUAUGAAUUGG	0	0	0	0	4 locus not expressed	No	fn-001	mb-01011	ax-1011011	ku-01	ss-000110011100
PID0527	Lin2016-hq	Rhsol	Rhi-milR-82		SRR1994877	6052857	0.660845	4	4	1	UGGGAUACCUGUAUGAAUUGGCGGA	CAGCCGAUUGGGCAAUCCCAG	GGGAUACCUGUAUGAAUUGG	0	0	1	0	3 cited not expressed	No	fn-011	mb-01011	ax-1011001	ku-01	ss-100011111000
PID0528	Lin2016-hq	Rhsol	Rhi-milR-158		SRR1994872	9065193	2.7578	25	24	0.96	UUAGGAGGUAUAGGUGGACUGG	AGGCAAGUUCUUGCUGUAAGUUCUCAUG	UUAGGAGGUAUAGGUGGACUG	0	0	9	0	3 cited not expressed	Yes	fn-111	mb-01111	ax-1001011	ku-01	ss-111111101010
PID0528	Lin2016-hq	Rhsol	Rhi-milR-158		SRR1994873	8626632	3.12984	27	27	1	UUAGGAGGUAUAGGUGGACUGG	AGGCAAGUUCUUGCUGUAAGUUCUCAUG	UUAGGAGGUAUAGGUGGACUG	0	0	6	0	3 cited not expressed	Yes	fn-111	mb-01011	ax-1001011	ku-01	ss-111111101000
PID0528	Lin2016-hq	Rhsol	Rhi-milR-158		SRR1994876	6833927	1.75595	12	12	1	CAUUAGGAGGUAUAGGUGGACUGG	AGGCAAGUUCUUGCUGUAAGUUCUCAUGGC	UUAGGAGGUAUAGGUGGACUG	0	0	4	0	3 cited not expressed	Yes	fn-111	mb-01011	ax-1001011	ku-01	ss-111111101010
PID0528	Lin2016-hq	Rhsol	Rhi-milR-158		SRR1994874	9302637	2.25742	21	19	0.904762	AUUAGGAGGUAUAGGUGGACUGG	AGGCAAGUUCUUGCUGUAAGUUCUCAUGG	UUAGGAGGUAUAGGUGGACUG	0	0	5	0	3 cited not expressed	Yes	fn-111	mb-01111	ax-1001011	ku-01	ss-111111101000
PID0528	Lin2016-hq	Rhsol	Rhi-milR-158		SRR1994877	6052857	1.65211	10	10	1	CAUUAGGAGGUAUAGGUGGACUGG	AGGCAAGUUCUUGCUGUAAGUUCUCAUGGC	UUAGGAGGUAUAGGUGGACUG	0	0	2	0	3 cited not expressed	No	fn-011	mb-01111	ax-1001011	ku-01	ss-101111101000
PID0528	Lin2016-hq	Rhsol	Rhi-milR-158		SRR1994871	8692379	0.575217	5	5	1	AUUAGGAGGUAUAGGUGGACUGG	AGGCAAGUUCUUGCUGUAAGUUCUCAUGG	UUAGGAGGUAUAGGUGGACUG	0	0	1	0	3 cited not expressed	No	fn-011	mb-01011	ax-1001011	ku-01	ss-110111101000
PID0528	Lin2016-hq	Rhsol	Rhi-milR-158		SRR1994875	4270606	0.702476	3	3	1	CAUUAGGAGGUAUAGGUGGACUGG	AGGCAAGUUCUUGCUGUAAGUUCUCAUGGC	UUAGGAGGUAUAGGUGGACUG	0	0	1	0	3 cited not expressed	No	fn-011	mb-01011	ax-1001011	ku-01	ss-100111101000
PID0529	Lin2016-hq	Rhsol	Rhi-milR-79		SRR1994874	9302637	2.04243	19	19	1	UGGAUUCGCUGUCGCACUUUUGA	AAAAGAGCGAUCUCGGAUUCAAG	GGAUUCGCUGUCGCACUUUUGA	0	0	5	0	3 cited not expressed	Yes	fn-111	mb-01011	ax-1011011	ku-01	ss-101111111100
PID0529	Lin2016-hq	Rhsol	Rhi-milR-79		SRR1994872	9065193	7.50122	68	68	1	CUGGAUUCGCUGUCGCACUUUUGAUGGU	CGUCAAAAGAGCGAUCUCGGAUUCAAG	GGAUUCGCUGUCGCACUUUUGA	0	0	13	0	3 cited not expressed	Yes	fn-111	mb-01011	ax-1011001	ku-01	ss-101011101100
PID0529	Lin2016-hq	Rhsol	Rhi-milR-79		SRR1994873	8626632	4.98456	43	43	1	UGGAUUCGCUGUCGCACUUUUGAUGGU	CGUCAAAAGAGCGAUCUCGGAUUCAAG	GGAUUCGCUGUCGCACUUUUGA	2	0	7	0	2 cited is not ma	Yes	fn-111	mb-01011	ax-1011001	ku-01	ss-101011101100
PID0529	Lin2016-hq	Rhsol	Rhi-milR-79		SRR1994876	6833927	0.292658	2	2	1	CUACUGGAUUCGCUGUCGCACUUUUGAU	CAAAAGAGCGAUCUCGGAUUCAAGGCU	GGAUUCGCUGUCGCACUUUUGA	0	0	2	0	3 cited not expressed	No	fn-011	mb-01011	ax-1011101	ku-01	ss-101011111110
PID0529	Lin2016-hq	Rhsol	Rhi-milR-79		SRR1994875	4270606	0.702476	3	3	1	GGAUUCGCUGUCGCACUUUUGAUGGU	CGUCAAAAGAGCGAUCUCGGAUUCAA	GGAUUCGCUGUCGCACUUUUGA	0	0	1	0	3 cited not expressed	No	fn-011	mb-01111	ax-1011001	ku-01	ss-100011111110
PID0529	Lin2016-hq	Rhsol	Rhi-milR-79		SRR1994877	6052857	0.826056	5	5	1	CGCUGUCGCACUUUUGAUGGU	CGUCAAAAGAGCGAUCUCGGA	GGAUUCGCUGUCGCACUUUUGA	0	0	1	0	3 cited not expressed	No	fn-011	mb-01011	ax-1011011	ku-01	ss-100111111100
PID0529	Lin2016-hq	Rhsol	Rhi-milR-79		SRR1994871	8692379	0	0	0	NA	GGAUUCGCUGUCGCACUUUUGA	AAAAGAGCGAUCUCGGAUUCAA	GGAUUCGCUGUCGCACUUUUGA	0	0	0	0	4 locus not expressed	No	fn-001	mb-01011	ax-1011011	ku-01	ss-000110001100
PID0532	Lin2016-hq	Rhsol	Rhi-milR-88		SRR1994875	4270606	0.468318	2	2	1	UAGUAGUACGGCUGUAAGCGC	GCAACAGUAGUAUAGCCUAGA	GUAGUAGUACGGCUGUAAGCGC	0	0	2	0	3 cited not expressed	No	fn-011	mb-01011	ax-1011111	ku-01	ss-111111101110
PID0532	Lin2016-hq	Rhsol	Rhi-milR-88		SRR1994872	9065193	0.772184	7	7	1	UAGUAGUACGGCUGUAAGCGC	GCAACAGUAGUAUAGCCUAGA	GUAGUAGUACGGCUGUAAGCGC	0	0	3	0	3 cited not expressed	No	fn-011	mb-01011	ax-1011011	ku-01	ss-111111101110
PID0532	Lin2016-hq	Rhsol	Rhi-milR-88		SRR1994873	8626632	1.39104	12	11	0.916667	UAGUAGUACGGCUGUAAGCG	CAACAGUAGUAUAGCCUAGA	GUAGUAGUACGGCUGUAAGCGC	0	0	4	0	3 cited not expressed	Yes	fn-111	mb-01011	ax-1011011	ku-01	ss-111111101110
PID0532	Lin2016-hq	Rhsol	Rhi-milR-88		SRR1994871	8692379	1.38052	12	12	1	UAGUAGUACGGCUGUAAGCGC	GCAACAGUAGUAUAGCCUAGA	GUAGUAGUACGGCUGUAAGCGC	0	0	5	0	3 cited not expressed	Yes	fn-111	mb-01011	ax-1011011	ku-01	ss-111111101110
PID0532	Lin2016-hq	Rhsol	Rhi-milR-88		SRR1994876	6833927	0.877973	6	6	1	UAGUAGUACGGCUGUAAGCGC	GCAACAGUAGUAUAGCCUAGA	GUAGUAGUACGGCUGUAAGCGC	0	0	3	0	3 cited not expressed	No	fn-011	mb-01011	ax-1011011	ku-01	ss-111111101100
PID0532	Lin2016-hq	Rhsol	Rhi-milR-88		SRR1994874	9302637	0.967468	9	9	1	UGUAGUAGUACGGCUGUAAGCG	CAACAGUAGUAUAGCCUAGAUA	GUAGUAGUACGGCUGUAAGCGC	0	0	2	0	3 cited not expressed	No	fn-011	mb-01011	ax-1001011	ku-01	ss-111111101100
PID0532	Lin2016-hq	Rhsol	Rhi-milR-88		SRR1994877	6052857	3.46944	21	21	1	UGUAGUAGUACGGCUGUAAGCG	CAACAGUAGUAUAGCCUAGAUA	GUAGUAGUACGGCUGUAAGCGC	0	0	5	0	3 cited not expressed	Yes	fn-111	mb-01011	ax-1001011	ku-01	ss-111111101100
PID0534	Lin2016-hq	Rhsol	Rhi-milR-46		SRR1994877	6052857	6.93887	42	34	0.809524	UCAAGGCACUGGAGGAAUGGCA	UCAAAAUCCUUCUCUGGUGCCAAAGCC	CAUCAAGGCACUGGAGGAAUGGC	0	0	5	0	3 cited not expressed	Yes	fn-111	mb-01011	ax-1001011	ku-01	ss-111111101100
PID0534	Lin2016-hq	Rhsol	Rhi-milR-46		SRR1994875	4270606	1.87327	8	4	0.5	UCAAGGCACUGGAGGAAUGGCA	UCAAAAUCCUUCUCUGGUGCCAAAGCC	CAUCAAGGCACUGGAGGAAUGGC	0	0	2	0	3 cited not expressed	No	fn-101	mb-01011	ax-1001011	ku-01	ss-101110001100
PID0534	Lin2016-hq	Rhsol	Rhi-milR-46		SRR1994872	9065193	2.09593	19	13	0.684211	UCAUCAAGGCACUGGAGGAAUGGC	CAAAAUCCUUCUCUGGUGCCAAAGCCAAC	CAUCAAGGCACUGGAGGAAUGGC	0	0	3	0	3 cited not expressed	No	fn-001	mb-01011	ax-1001011	ku-01	ss-111110101100
PID0534	Lin2016-hq	Rhsol	Rhi-milR-46		SRR1994876	6833927	2.78025	19	14	0.736842	CAAGGCACUGGAGGAAUGGCA	UCAAAAUCCUUCUCUGGUGCCAAAGC	CAUCAAGGCACUGGAGGAAUGGC	0	0	2	0	3 cited not expressed	No	fn-001	mb-01011	ax-1001011	ku-01	ss-111110101100
PID0534	Lin2016-hq	Rhsol	Rhi-milR-46		SRR1994873	8626632	1.50696	13	9	0.692308	UCAAGGCACUGGAGGAAUGGC	CAAAAUCCUUCUCUGGUGCCAAAGCC	CAUCAAGGCACUGGAGGAAUGGC	0	0	3	0	3 cited not expressed	No	fn-001	mb-01011	ax-1001011	ku-01	ss-111110101100
PID0534	Lin2016-hq	Rhsol	Rhi-milR-46		SRR1994874	9302637	1.61245	15	14	0.933333	UCAUCAAGGCACUGGAGGAAUGGC	CAAAAUCCUUCUCUGGUGCCAAAGCCAAC	CAUCAAGGCACUGGAGGAAUGGC	1	0	2	0	2 cited is not ma	No	fn-011	mb-01011	ax-1001011	ku-01	ss-101111101100
PID0534	Lin2016-hq	Rhsol	Rhi-milR-46		SRR1994871	8692379	0.34513	3	2	0.666667	AAGGCACUGGAGGAAUGGCAAAUC	CAAAAUCCUUCUCUGGUGCCAAAGCCAA	CAUCAAGGCACUGGAGGAAUGGC	0	0	1	0	3 cited not expressed	No	fn-001	mb-00011	ax-1001011	ku-01	ss-110110101100
PID0535	Lin2016-hq	Rhsol	Rhi-milR-34		SRR1994872	9065193	4.30217	39	27	0.692308	CAGGGGUGGCUGUUGAAUUGAG	GGUUCUUUAGCCAGCUUC	AGGGGUGGCUGUUGAAUUGAG	2	0	8	0	2 cited is not ma	No	fn-101	mb-01011	ax-1011011	ku-01	ss-111110101000
PID0535	Lin2016-hq	Rhsol	Rhi-milR-34		SRR1994874	9302637	2.57991	24	14	0.583333	AGGGGUGGCUGUUGAAUUGAG	GGUUCUUUAGCCAGCUU	AGGGGUGGCUGUUGAAUUGAG	2	0	2	0	1 cited is ma	No	fn-101	mb-01011	ax-1011011	ku-01	ss-111110101000
PID0535	Lin2016-hq	Rhsol	Rhi-milR-34		SRR1994876	6833927	1.17063	8	6	0.75	CAGGGGUGGCUGUUGAAUUGAG	GGUUCUUUAGCCAGCUUC	AGGGGUGGCUGUUGAAUUGAG	0	0	3	0	3 cited not expressed	No	fn-001	mb-01011	ax-1011011	ku-01	ss-101110101000
PID0535	Lin2016-hq	Rhsol	Rhi-milR-34		SRR1994873	8626632	3.4776	30	17	0.566667	CAGGGGUGGCUGUUGAAUUGAGCA	GUGGUUCUUUAGCCAGCUUC	AGGGGUGGCUGUUGAAUUGAG	0	0	6	0	3 cited not expressed	No	fn-101	mb-01011	ax-1001011	ku-01	ss-111110101000
PID0535	Lin2016-hq	Rhsol	Rhi-milR-34		SRR1994877	6052857	2.47817	15	5	0.333333	CAGGGGUGGCUGUUGAAUUGAG	GGUUCUUUAGCCAGCUUC	AGGGGUGGCUGUUGAAUUGAG	0	0	3	0	3 cited not expressed	No	fn-101	mb-01011	ax-1011011	ku-01	ss-111110001000
PID0535	Lin2016-hq	Rhsol	Rhi-milR-34		SRR1994875	4270606	0.234159	1	1	1	CAGGGGUGGCUGUUGAAUUGAGCAC	GGUGGUUCUUUAGCCAGCUUC	AGGGGUGGCUGUUGAAUUGAG	0	0	1	0	3 cited not expressed	No	fn-011	mb-01011	ax-1001101	ku-01	ss-100011101010
PID0535	Lin2016-hq	Rhsol	Rhi-milR-34		SRR1994871	8692379	1.03539	9	4	0.444444	UGGCUGUUGAAUUGAGCACAAA	AGUGGUGGUUCUUUAGCCAGC	AGGGGUGGCUGUUGAAUUGAG	0	0	1	0	3 cited not expressed	No	fn-001	mb-01011	ax-1001011	ku-01	ss-100110001100
PID0537	Lin2016-hq	Rhsol	Rhi-milR-170		SRR1994871	8692379	266.325	2315	754	0.325702	UUGGGGUGCUUGUAGACAUUGC	UCUAGCUGCUGGUGCUCAUCAGGC	UUGGGGUGCUUGUAGACAUU	23	16	288	1	2 cited is not ma	No	fn-101	mb-01011	ax-1101011	ku-11	ss-111110001101
PID0537	Lin2016-hq	Rhsol	Rhi-milR-170		SRR1994872	9065193	63.2088	573	251	0.438045	UUGGGGUGCUUGUAGACAUUGC	UCUAGCUGCUGGUGCUCAUCAGGC	UUGGGGUGCUUGUAGACAUU	0	7	94	2	3 cited not expressed	No	fn-101	mb-01011	ax-1101011	ku-01	ss-111110001101
PID0537	Lin2016-hq	Rhsol	Rhi-milR-170		SRR1994876	6833927	97.016	663	218	0.328808	UUGGGGUGCUUGUAGACAUUGC	UCUAGCUGCUGGUGCUCAUCAGGC	UUGGGGUGCUUGUAGACAUU	1	4	68	0	2 cited is not ma	No	fn-101	mb-01011	ax-1001011	ku-01	ss-111110001100
PID0537	Lin2016-hq	Rhsol	Rhi-milR-170		SRR1994875	4270606	92.7269	396	137	0.34596	UUGGGGUGCUUGUAGACAUUGC	UCUAGCUGCUGGUGCUCAUCAGGC	UUGGGGUGCUUGUAGACAUU	1	6	38	0	2 cited is not ma	No	fn-101	mb-01011	ax-1001011	ku-01	ss-111110001100
PID0537	Lin2016-hq	Rhsol	Rhi-milR-170		SRR1994873	8626632	71.9864	621	238	0.383253	UUGGGGUGCUUGUAGACAUUGC	UCUAGCUGCUGGUGCUCAUCAGGC	UUGGGGUGCUUGUAGACAUU	1	4	88	0	2 cited is not ma	No	fn-101	mb-01011	ax-1001011	ku-01	ss-111110001100
PID0537	Lin2016-hq	Rhsol	Rhi-milR-170		SRR1994874	9302637	76.4299	711	257	0.361463	UUGGGGUGCUUGUAGACAUUGC	UCUAGCUGCUGGUGCUCAUCAGGC	UUGGGGUGCUUGUAGACAUU	0	6	101	0	3 cited not expressed	No	fn-101	mb-01011	ax-1001011	ku-01	ss-111110001100
PID0537	Lin2016-hq	Rhsol	Rhi-milR-170		SRR1994877	6052857	136.63	827	168	0.203144	UUGGGGUGCUUGUAGACAUUGC	UCUAGCUGCUGGUGCUCAUCAGGC	UUGGGGUGCUUGUAGACAUU	1	7	64	0	2 cited is not ma	No	fn-101	mb-01011	ax-1001011	ku-01	ss-111110001100
PID0538	Lin2016-hq	Rhsol	Rhi-milR-156		SRR1994872	9065193	7.17028	65	54	0.830769	UGGCGGACUAUGUGAAUACAGC	CCAAGGCCAUAAGGGCAGU	UUAAGGCGGUGUGGAUGGUA	1	0	11	0	2 cited is not ma	Yes	fn-111	mb-00110	ax-1001011	ku-01	ss-111111101100
PID0538	Lin2016-hq	Rhsol	Rhi-milR-156		SRR1994876	6833927	14.6329	100	93	0.93	UGGCGGACUAUGUGAAUACAGC	CCAAGGCCAUAAGGGCAGU	UUAAGGCGGUGUGGAUGGUA	1	0	15	0	2 cited is not ma	Yes	fn-111	mb-00010	ax-1001011	ku-01	ss-111111101100
PID0538	Lin2016-hq	Rhsol	Rhi-milR-156		SRR1994875	4270606	10.5371	45	44	0.977778	UGGCGGACUAUGUGAAUACAGC	CCAAGGCCAUAAGGGCAGU	UUAAGGCGGUGUGGAUGGUA	0	0	5	0	3 cited not expressed	Yes	fn-111	mb-00010	ax-1001011	ku-01	ss-111111101100
PID0538	Lin2016-hq	Rhsol	Rhi-milR-156		SRR1994873	8626632	11.3602	98	92	0.938776	UGGCGGACUAUGUGAAUACAGC	CCAAGGCCAUAAGGGCAGU	UUAAGGCGGUGUGGAUGGUA	1	0	10	0	2 cited is not ma	Yes	fn-111	mb-00010	ax-1001011	ku-01	ss-111111101100
PID0538	Lin2016-hq	Rhsol	Rhi-milR-156		SRR1994871	8692379	41.5306	361	318	0.880886	UGGCGGACUAUGUGAAUACAGC	CCAAGGCCAUAAGGGCAGU	UUAAGGCGGUGUGGAUGGUA	6	0	26	0	2 cited is not ma	Yes	fn-111	mb-00010	ax-1001011	ku-01	ss-111111101100
PID0538	Lin2016-hq	Rhsol	Rhi-milR-156		SRR1994874	9302637	13.9745	130	119	0.915385	UUAAGGCGGUGUGGAUGGUACAAA	UGACCAAGGCCAUAAGGGCAGU	UUAAGGCGGUGUGGAUGGUA	2	0	13	0	2 cited is not ma	Yes	fn-111	mb-01010	ax-1001011	ku-01	ss-111111101100
PID0538	Lin2016-hq	Rhsol	Rhi-milR-156		SRR1994877	6052857	16.1907	98	95	0.969388	UUAAGGCGGUGUGGAUGGUACAAA	UGACCAAGGCCAUAAGGGCAGU	UUAAGGCGGUGUGGAUGGUA	3	0	9	0	2 cited is not ma	Yes	fn-111	mb-01010	ax-1001011	ku-01	ss-111111101100
PID0540	Lin2016-hq	Rhsol	Rhi-milR-173		SRR1994876	6833927	2.0486	14	14	1	UUUGUGGGGUCAGAGUUUGUAGUG	CUGUACAAACUCAGUGCUCCACCC	UUGUGGGGUCAGAGUUUGUAGUG	0	0	7	0	3 cited not expressed	Yes	fn-111	mb-01011	ax-1011011	ku-01	ss-111111111110
PID0540	Lin2016-hq	Rhsol	Rhi-milR-173		SRR1994872	9065193	1.8753	17	16	0.941176	UUUGUGGGGUCAGAGUUUGUAGUG	CUGUACAAACUCAGUGCUCCACCC	UUGUGGGGUCAGAGUUUGUAGUG	2	0	6	0	2 cited is not ma	Yes	fn-111	mb-01011	ax-1011011	ku-01	ss-111111111100
PID0540	Lin2016-hq	Rhsol	Rhi-milR-173		SRR1994873	8626632	1.85472	16	15	0.9375	UUUGUGGGGUCAGAGUUUGUAGUG	CUGUACAAACUCAGUGCUCCACCC	UUGUGGGGUCAGAGUUUGUAGUG	0	0	7	0	3 cited not expressed	Yes	fn-111	mb-01011	ax-1011011	ku-01	ss-111111111100
PID0540	Lin2016-hq	Rhsol	Rhi-milR-173		SRR1994877	6052857	0.826056	5	3	0.6	UUUGUGGGGUCAGAGUUUGUAGUG	CUGUACAAACUCAGUGCUCCACCC	UUGUGGGGUCAGAGUUUGUAGUG	0	0	2	0	3 cited not expressed	No	fn-001	mb-01011	ax-1011011	ku-01	ss-111110111100
PID0540	Lin2016-hq	Rhsol	Rhi-milR-173		SRR1994875	4270606	1.40495	6	4	0.666667	UUUGUGGGGUCAGAGUUUGUAGUG	CUGUACAAACUCAGUGCUCCACCC	UUGUGGGGUCAGAGUUUGUAGUG	1	0	2	0	2 cited is not ma	No	fn-101	mb-01011	ax-1011011	ku-01	ss-111110111100
PID0540	Lin2016-hq	Rhsol	Rhi-milR-173		SRR1994874	9302637	1.93494	18	17	0.944444	UUGUGGGGUCAGAGUUUGUAGUG	CUGUACAAACUCAGUGCUCCACC	UUGUGGGGUCAGAGUUUGUAGUG	5	0	5	0	1 cited is ma	Yes	fn-111	mb-01011	ax-1011011	ku-01	ss-111111111110
PID0540	Lin2016-hq	Rhsol	Rhi-milR-173		SRR1994871	8692379	3.79643	33	31	0.939394	UGGGGUCAGAGUUUGUAGUGUUAG	CACACUGUACAAACUCAGUGCUCCACC	UUGUGGGGUCAGAGUUUGUAGUG	1	0	4	0	2 cited is not ma	Yes	fn-111	mb-01011	ax-1001011	ku-01	ss-111111101100
PID0541	Lin2016-hq	Rhsol	Rhi-milR-58		SRR1994873	8626632	2.43432	21	21	1	CGUGAACGAGAACGAGAGCGGGA	CCGCGAACGUGAACGUGAACGCGAC	CGUGAACGAGAACGAGAGCGGG	2	0	5	0	2 cited is not ma	Yes	fn-111	mb-01011	ax-1001111	ku-01	ss-101111101110
PID0541	Lin2016-hq	Rhsol	Rhi-milR-58		SRR1994872	9065193	4.08155	37	37	1	CGUGAACGAGAACGAGAGCGGGA	CCGCGAACGUGAACGUGAACGCGAC	CGUGAACGAGAACGAGAGCGGG	1	0	10	0	2 cited is not ma	Yes	fn-111	mb-01011	ax-1001011	ku-01	ss-101111101110
PID0541	Lin2016-hq	Rhsol	Rhi-milR-58		SRR1994876	6833927	1.0243	7	7	1	UCGUGAACGAGAACGAGAGCGGGA	CCGCGAACGUGAACGUGAACGCGACC	CGUGAACGAGAACGAGAGCGGG	0	0	2	0	3 cited not expressed	Yes	fn-111	mb-01011	ax-1001011	ku-01	ss-101111101110
PID0541	Lin2016-hq	Rhsol	Rhi-milR-58		SRR1994874	9302637	2.36492	22	22	1	CGUGAACGAGAACGAGAGCGGGAU	CCCGCGAACGUGAACGUGAACGCGAC	CGUGAACGAGAACGAGAGCGGG	1	0	5	0	2 cited is not ma	Yes	fn-111	mb-01011	ax-1001011	ku-01	ss-101111101100
PID0541	Lin2016-hq	Rhsol	Rhi-milR-58		SRR1994877	6052857	0.495634	3	3	1	CAUUCGUGAACGAGAACGAGAGCGGG	CGCGAACGUGAACGUGAACGCGACC	CGUGAACGAGAACGAGAGCGGG	0	0	2	0	3 cited not expressed	No	fn-011	mb-01011	ax-1001001	ku-01	ss-101011101110
PID0541	Lin2016-hq	Rhsol	Rhi-milR-58		SRR1994871	8692379	0.115043	1	1	1	UGCCCCGCGAACGUGAAC	GAACGAGAGCGGGAUUCG	CGUGAACGAGAACGAGAGCGGG	0	0	1	0	3 cited not expressed	No	fn-011	mb-01010	ax-1001101	ku-01	ss-100011101110
PID0541	Lin2016-hq	Rhsol	Rhi-milR-58		SRR1994875	4270606	0.702476	3	3	1	CGUGAACGAGAACGAGAGCGGGAUU	CCCCGCGAACGUGAACGUGAACGCGAC	CGUGAACGAGAACGAGAGCGGG	0	0	1	0	3 cited not expressed	No	fn-011	mb-01011	ax-1001001	ku-01	ss-100011101100
PID0542	Lin2016-hq	Rhsol	Rhi-milR-104		SRR1994876	6833927	1.75595	12	12	1	UUAGAAUGGGCUGGGAAUAUUAGU	UUGUAUUUUGGGCUCCAUCUGGCU	UAGAAUGGGCUGGGAAUAUUAGU	0	0	5	0	3 cited not expressed	Yes	fn-111	mb-01111	ax-1011111	ku-01	ss-111111101110
PID0542	Lin2016-hq	Rhsol	Rhi-milR-104		SRR1994872	9065193	1.21343	11	11	1	UUAGAAUGGGCUGGGAAUAUUAGU	UUGUAUUUUGGGCUCCAUCUGGCU	UAGAAUGGGCUGGGAAUAUUAGU	0	0	4	0	3 cited not expressed	Yes	fn-111	mb-01111	ax-1011011	ku-01	ss-111111101110
PID0542	Lin2016-hq	Rhsol	Rhi-milR-104		SRR1994875	4270606	1.40495	6	6	1	UUAGAAUGGGCUGGGAAUAUUAGU	UUGUAUUUUGGGCUCCAUCUGGCU	UAGAAUGGGCUGGGAAUAUUAGU	0	0	4	0	3 cited not expressed	Yes	fn-111	mb-01011	ax-1011111	ku-01	ss-111111101110
PID0542	Lin2016-hq	Rhsol	Rhi-milR-104		SRR1994873	8626632	2.3184	20	20	1	UUAGAAUGGGCUGGGAAUAUUAGU	UUGUAUUUUGGGCUCCAUCUGGCU	UAGAAUGGGCUGGGAAUAUUAGU	2	0	10	0	2 cited is not ma	Yes	fn-111	mb-01011	ax-1011111	ku-01	ss-111111101110
PID0542	Lin2016-hq	Rhsol	Rhi-milR-104		SRR1994877	6052857	9.41704	57	57	1	UUAGAAUGGGCUGGGAAUAUUAGU	UUGUAUUUUGGGCUCCAUCUGGCU	UAGAAUGGGCUGGGAAUAUUAGU	2	0	24	0	2 cited is not ma	Yes	fn-111	mb-01111	ax-1011011	ku-01	ss-111111101110
PID0542	Lin2016-hq	Rhsol	Rhi-milR-104		SRR1994874	9302637	3.43988	32	32	1	UUAGAAUGGGCUGGGAAUAUUAG	UGUAUUUUGGGCUCCAUCUGGCU	UAGAAUGGGCUGGGAAUAUUAGU	0	0	11	0	3 cited not expressed	Yes	fn-111	mb-01111	ax-1011011	ku-01	ss-111111111110
PID0542	Lin2016-hq	Rhsol	Rhi-milR-104		SRR1994871	8692379	2.76104	24	24	1	UUAGAAUGGGCUGGGAAUAUUAG	UGUAUUUUGGGCUCCAUCUGGCU	UAGAAUGGGCUGGGAAUAUUAGU	0	1	6	0	3 cited not expressed	Yes	fn-111	mb-01011	ax-1011011	ku-01	ss-111111111100
PID0543	Lin2016-hq	Rhsol	Rhi-milR-92		SRR1994875	4270606	959.817	4099	4099	1	UGUGUUUGGUUACUUUGCUUGCAG	GUAAGCAAGAUAACAAAAUACACC	GUGUUUGGUUACUUUGCUUGCAG	31	0	3319	0	2 cited is not ma	Yes	fn-111	mb-01111	ax-1011111	ku-11	ss-111111111110
PID0543	Lin2016-hq	Rhsol	Rhi-milR-92		SRR1994873	8626632	856.534	7389	7389	1	UGUGUUUGGUUACUUUGCUUGCAG	GUAAGCAAGAUAACAAAAUACACC	GUGUUUGGUUACUUUGCUUGCAG	38	0	5754	0	2 cited is not ma	Yes	fn-111	mb-01111	ax-1011111	ku-11	ss-111111111110
PID0543	Lin2016-hq	Rhsol	Rhi-milR-92		SRR1994876	6833927	1556.21	10635	10635	1	UGUGUUUGGUUACUUUGCUUGCAG	GUAAGCAAGAUAACAAAAUACACC	GUGUUUGGUUACUUUGCUUGCAG	70	0	8201	0	2 cited is not ma	Yes	fn-111	mb-01111	ax-1011111	ku-11	ss-101111111110
PID0543	Lin2016-hq	Rhsol	Rhi-milR-92		SRR1994871	8692379	2926.59	25439	25439	1	UGUGUUUGGUUACUUUGCUUGCAG	GUAAGCAAGAUAACAAAAUACACC	GUGUUUGGUUACUUUGCUUGCAG	128	0	19065	0	2 cited is not ma	Yes	fn-111	mb-01111	ax-1011111	ku-11	ss-101111111110
PID0543	Lin2016-hq	Rhsol	Rhi-milR-92		SRR1994874	9302637	915.654	8518	8518	1	UGUGUUUGGUUACUUUGCUUGCAG	GUAAGCAAGAUAACAAAAUACACC	GUGUUUGGUUACUUUGCUUGCAG	32	0	6793	0	2 cited is not ma	Yes	fn-111	mb-01011	ax-1011111	ku-11	ss-111111111110
PID0543	Lin2016-hq	Rhsol	Rhi-milR-92		SRR1994877	6052857	1902.9	11518	11518	1	UGUGUUUGGUUACUUUGCUUGCAG	GUAAGCAAGAUAACAAAAUACACC	GUGUUUGGUUACUUUGCUUGCAG	47	0	8653	0	2 cited is not ma	Yes	fn-111	mb-01111	ax-1011111	ku-11	ss-101111111110
PID0543	Lin2016-hq	Rhsol	Rhi-milR-92		SRR1994872	9065193	937.983	8503	8503	1	UGUGUUUGGUUACUUUGCUUGCAG	GUAAGCAAGAUAACAAAAUACACC	GUGUUUGGUUACUUUGCUUGCAG	43	0	6499	0	2 cited is not ma	Yes	fn-111	mb-01011	ax-1011111	ku-11	ss-101111111110
PID0544	Lin2016-hq	Rhsol	Rhi-milR-36		SRR1994871	8692379	40.4952	352	352	1	UAUGAUGUGUUGAUUUGUUUGCAG	GUAAGCAAGUUAACAUAACAUACC	AUGAUGUGUUGAUUUGUUUGCAG	4	0	238	2	2 cited is not ma	Yes	fn-111	mb-01111	ax-1111111	ku-11	ss-111111111111
PID0544	Lin2016-hq	Rhsol	Rhi-milR-36		SRR1994873	8626632	8.46217	73	73	1	UAUGAUGUGUUGAUUUGUUUGCAG	GUAAGCAAGUUAACAUAACAUACC	AUGAUGUGUUGAUUUGUUUGCAG	0	0	59	1	3 cited not expressed	Yes	fn-111	mb-01111	ax-1111111	ku-01	ss-111111111111
PID0544	Lin2016-hq	Rhsol	Rhi-milR-36		SRR1994872	9065193	3.97123	36	36	1	UAUGAUGUGUUGAUUUGUUUGCAG	GUAAGCAAGUUAACAUAACAUACC	AUGAUGUGUUGAUUUGUUUGCAG	0	0	27	0	3 cited not expressed	Yes	fn-111	mb-01011	ax-1011111	ku-01	ss-111111111110
PID0544	Lin2016-hq	Rhsol	Rhi-milR-36		SRR1994876	6833927	32.046	219	219	1	UAUGAUGUGUUGAUUUGUUUGCAG	GUAAGCAAGUUAACAUAACAUACC	AUGAUGUGUUGAUUUGUUUGCAG	1	0	155	0	2 cited is not ma	Yes	fn-111	mb-01011	ax-1011111	ku-11	ss-101111111110
PID0544	Lin2016-hq	Rhsol	Rhi-milR-36		SRR1994877	6052857	35.0248	212	212	1	UAUGAUGUGUUGAUUUGUUUGCAG	GUAAGCAAGUUAACAUAACAUACC	AUGAUGUGUUGAUUUGUUUGCAG	0	0	158	0	3 cited not expressed	Yes	fn-111	mb-01011	ax-1011111	ku-11	ss-101111111110
PID0544	Lin2016-hq	Rhsol	Rhi-milR-36		SRR1994875	4270606	10.0688	43	43	1	UAUGAUGUGUUGAUUUGUUUGCAG	GUAAGCAAGUUAACAUAACAUACC	AUGAUGUGUUGAUUUGUUUGCAG	0	0	30	0	3 cited not expressed	Yes	fn-111	mb-01011	ax-1011111	ku-01	ss-101111111110
PID0544	Lin2016-hq	Rhsol	Rhi-milR-36		SRR1994874	9302637	18.1669	169	169	1	UAUGAUGUGUUGAUUUGUUUGCAG	GUAAGCAAGUUAACAUAACAUACC	AUGAUGUGUUGAUUUGUUUGCAG	0	0	116	0	3 cited not expressed	Yes	fn-111	mb-01011	ax-1011111	ku-01	ss-101111111110
PID0545	Lin2016-hq	Rhsol	Rhi-milR-73		SRR1994874	9302637	0.429986	4	4	1	UGCAUUUUGUUGAUUUGUUUGCAG	GUAAGCAAGUUAACACAAUACACC	GCAUUUUGUUGAUUUGUUUGC	0	0	3	0	3 cited not expressed	No	fn-011	mb-01011	ax-1011111	ku-01	ss-111111111110
PID0545	Lin2016-hq	Rhsol	Rhi-milR-73		SRR1994876	6833927	5.70682	39	39	1	UGCAUUUUGUUGAUUUGUUUGCAG	GUAAGCAAGUUAACACAAUACACC	GCAUUUUGUUGAUUUGUUUGC	0	0	20	0	3 cited not expressed	Yes	fn-111	mb-01111	ax-1011011	ku-01	ss-101111111110
PID0545	Lin2016-hq	Rhsol	Rhi-milR-73		SRR1994873	8626632	1.50696	13	13	1	UGCAUUUUGUUGAUUUGUUUGCAG	GUAAGCAAGUUAACACAAUACACC	GCAUUUUGUUGAUUUGUUUGC	0	0	9	0	3 cited not expressed	Yes	fn-111	mb-01011	ax-1011011	ku-01	ss-101111111110
PID0545	Lin2016-hq	Rhsol	Rhi-milR-73		SRR1994877	6052857	3.63465	22	22	1	UGCAUUUUGUUGAUUUGUUUGCAG	GUAAGCAAGUUAACACAAUACACC	GCAUUUUGUUGAUUUGUUUGC	0	0	15	0	3 cited not expressed	Yes	fn-111	mb-01011	ax-1011011	ku-01	ss-101111111110
PID0545	Lin2016-hq	Rhsol	Rhi-milR-73		SRR1994872	9065193	1.10312	10	10	1	UGCAUUUUGUUGAUUUGUUUGCAG	GUAAGCAAGUUAACACAAUACACC	GCAUUUUGUUGAUUUGUUUGC	0	0	4	0	3 cited not expressed	No	fn-011	mb-01011	ax-1011011	ku-01	ss-101111111100
PID0545	Lin2016-hq	Rhsol	Rhi-milR-73		SRR1994871	8692379	10.584	92	92	1	UGCAUUUUGUUGAUUUGUUUGC	AAGCAAGUUAACACAAUACACC	GCAUUUUGUUGAUUUGUUUGC	2	0	32	0	2 cited is not ma	Yes	fn-111	mb-01011	ax-1011011	ku-01	ss-111111111100
PID0545	Lin2016-hq	Rhsol	Rhi-milR-73		SRR1994875	4270606	0.702476	3	3	1	AGGCUGUAUGCUUUACCUUGG	AAGCAAGUUAACACAAUACAC	GCAUUUUGUUGAUUUGUUUGC	0	0	1	0	3 cited not expressed	No	fn-011	mb-00010	ax-1011011	ku-01	ss-110111111100
PID0546	Lin2016-hq	Rhsol	Rhi-milR-60		SRR1994876	6833927	12.4379	85	69	0.811765	AACUAUAUCGCAAGCUUGAGAGAG	CUAUUUGGCGGCGAUAUAUCUUA	CUAUAUCGCAAGCUUGAGAGA	0	0	38	1	3 cited not expressed	Yes	fn-111	mb-01010	ax-1101011	ku-01	ss-111111101111
PID0546	Lin2016-hq	Rhsol	Rhi-milR-60		SRR1994875	4270606	0.702476	3	3	1	AACUAUAUCGCAAGCUUGAGAGAG	CUAUUUGGCGGCGAUAUAUCUUA	CUAUAUCGCAAGCUUGAGAGA	0	0	3	0	3 cited not expressed	Yes	fn-111	mb-01010	ax-1001111	ku-01	ss-111111101110
PID0546	Lin2016-hq	Rhsol	Rhi-milR-60		SRR1994877	6052857	15.3646	93	84	0.903226	AACUAUAUCGCAAGCUUGAGAGAG	CUAUUUGGCGGCGAUAUAUCUUA	CUAUAUCGCAAGCUUGAGAGA	3	0	40	0	2 cited is not ma	Yes	fn-111	mb-01110	ax-1001011	ku-01	ss-111111101110
PID0546	Lin2016-hq	Rhsol	Rhi-milR-60		SRR1994874	9302637	1.93494	18	15	0.833333	AACUAUAUCGCAAGCUUGAGAGAG	CUAUUUGGCGGCGAUAUAUCUUA	CUAUAUCGCAAGCUUGAGAGA	0	0	6	0	3 cited not expressed	Yes	fn-111	mb-01010	ax-1001011	ku-01	ss-111111101100
PID0546	Lin2016-hq	Rhsol	Rhi-milR-60		SRR1994871	8692379	3.91147	34	27	0.794118	AACUAUAUCGCAAGCUUGAGAGAG	CUAUUUGGCGGCGAUAUAUCUUA	CUAUAUCGCAAGCUUGAGAGA	2	2	13	0	2 cited is not ma	No	fn-101	mb-01010	ax-1001011	ku-01	ss-111110101100
PID0546	Lin2016-hq	Rhsol	Rhi-milR-60		SRR1994872	9065193	0.772184	7	6	0.857143	CUAUAUCGCAAGCUUGAGAGAG	CUAUUUGGCGGCGAUAUAUCU	CUAUAUCGCAAGCUUGAGAGA	1	0	2	0	2 cited is not ma	No	fn-011	mb-01011	ax-1001011	ku-01	ss-111111101110
PID0546	Lin2016-hq	Rhsol	Rhi-milR-60		SRR1994873	8626632	1.1592	10	8	0.8	UAUUUGGCGGCGAUAUAUCUUA	AACUAUAUCGCAAGCUUGAGAGA	CUAUAUCGCAAGCUUGAGAGA	0	0	2	0	3 cited not expressed	No	fn-001	mb-01010	ax-1001011	ku-01	ss-111110101100
PID0547	Lin2016-hq	Rhsol	Rhi-milR-160		SRR1994871	8692379	6.9026	60	60	1	GUUAGUUCCAAUUUCGUGUCCGG	GCAAGCUGACCCGAUUUUGGGACUAGUACCU	UUAGUUCCAAUUUCGUGUCCGG	1	0	31	0	2 cited is not ma	Yes	fn-111	mb-01011	ax-1001111	ku-01	ss-111111101010
PID0547	Lin2016-hq	Rhsol	Rhi-milR-160		SRR1994877	6052857	3.30422	20	18	0.9	GUUAGUUCCAAUUUCGUGUCCGG	GCAAGCUGACCCGAUUUUGGGACUAGUACCU	UUAGUUCCAAUUUCGUGUCCGG	0	0	10	0	3 cited not expressed	Yes	fn-111	mb-01011	ax-1001111	ku-01	ss-111111101010
PID0547	Lin2016-hq	Rhsol	Rhi-milR-160		SRR1994872	9065193	3.52999	32	30	0.9375	GUUAGUUCCAAUUUCGUGUCCGG	GCAAGCUGACCCGAUUUUGGGACUAGUACCU	UUAGUUCCAAUUUCGUGUCCGG	2	0	11	0	2 cited is not ma	Yes	fn-111	mb-01011	ax-1001011	ku-01	ss-111111101010
PID0547	Lin2016-hq	Rhsol	Rhi-milR-160		SRR1994876	6833927	2.19493	15	14	0.933333	GUUAGUUCCAAUUUCGUGUCCGG	GCAAGCUGACCCGAUUUUGGGACUAGUACCU	UUAGUUCCAAUUUCGUGUCCGG	0	0	7	0	3 cited not expressed	Yes	fn-111	mb-01011	ax-1001111	ku-01	ss-101111101010
PID0547	Lin2016-hq	Rhsol	Rhi-milR-160		SRR1994874	9302637	1.39745	13	13	1	GUUAGUUCCAAUUUCGUGUCCGG	GCAAGCUGACCCGAUUUUGGGACUAGUACCU	UUAGUUCCAAUUUCGUGUCCGG	0	0	7	0	3 cited not expressed	Yes	fn-111	mb-01011	ax-1001011	ku-01	ss-111111101010
PID0547	Lin2016-hq	Rhsol	Rhi-milR-160		SRR1994873	8626632	3.12984	27	27	1	GUUAGUUCCAAUUUCGUGUCCGG	GCAAGCUGACCCGAUUUUGGGACUAGUACCU	UUAGUUCCAAUUUCGUGUCCGG	0	0	10	0	3 cited not expressed	Yes	fn-111	mb-01011	ax-1001011	ku-01	ss-101111101010
PID0547	Lin2016-hq	Rhsol	Rhi-milR-160		SRR1994875	4270606	1.87327	8	8	1	UAGUUCCAAUUUCGUGUCCGG	GCAAGCUGACCCGAUUUUGGGACUAGUAC	UUAGUUCCAAUUUCGUGUCCGG	0	0	3	0	3 cited not expressed	Yes	fn-111	mb-00011	ax-1001011	ku-01	ss-111111101000
PID0548	Lin2016-hq	Rhsol	Rhi-milR-48		SRR1994872	9065193	3.30936	30	30	1	CAUGGGCAUGUUGGGAGAUGGUAA	GCCAACUCGAGACAUACCUAUGCG	CAUGGGCAUGUUGGGAGAUGGUA	7	0	8	0	2 cited is not ma	Yes	fn-111	mb-01011	ax-1011011	ku-01	ss-101111101110
PID0548	Lin2016-hq	Rhsol	Rhi-milR-48		SRR1994873	8626632	2.78208	24	24	1	CAUGGGCAUGUUGGGAGA	UCGAGACAUACCUAUGCG	CAUGGGCAUGUUGGGAGAUGGUA	2	0	7	0	2 cited is not ma	Yes	fn-111	mb-01111	ax-1011001	ku-01	ss-101011111100
PID0548	Lin2016-hq	Rhsol	Rhi-milR-48		SRR1994876	6833927	0.438986	3	3	1	CAUGGGCAUGUUGGGAGAUGGUA	CCAACUCGAGACAUACCUAUGCG	CAUGGGCAUGUUGGGAGAUGGUA	1	0	1	0	1 cited is ma	No	fn-011	mb-01111	ax-1011011	ku-01	ss-110111101110
PID0548	Lin2016-hq	Rhsol	Rhi-milR-48		SRR1994875	4270606	0.234159	1	1	1	AUGGGCAUGUUGGGAGAUGGUA	CCAACUCGAGACAUACCUAUGC	CAUGGGCAUGUUGGGAGAUGGUA	0	0	1	0	3 cited not expressed	No	fn-011	mb-01011	ax-1011111	ku-01	ss-110111101110
PID0548	Lin2016-hq	Rhsol	Rhi-milR-48		SRR1994877	6052857	0.660845	4	4	1	CAUGGGCAUGUUGGGAGAUGGUA	CCAACUCGAGACAUACCUAUGCG	CAUGGGCAUGUUGGGAGAUGGUA	2	0	2	0	1 cited is ma	No	fn-011	mb-01111	ax-1011011	ku-01	ss-101111101100
PID0548	Lin2016-hq	Rhsol	Rhi-milR-48		SRR1994874	9302637	1.07496	10	10	1	CAUGGGCAUGUUGGGAGAUGGUA	CCAACUCGAGACAUACCUAUGCG	CAUGGGCAUGUUGGGAGAUGGUA	2	0	2	0	1 cited is ma	No	fn-011	mb-01011	ax-1011011	ku-01	ss-101111101100
PID0548	Lin2016-hq	Rhsol	Rhi-milR-48		SRR1994871	8692379	0.460173	4	4	1	UAUCAUGGGCAUGUUGGG	AGACAUACCUAUGCG	CAUGGGCAUGUUGGGAGAUGGUA	0	0	1	0	3 cited not expressed	No	fn-011	mb-01011	ax-1011001	ku-01	ss-100011111100
PID0550	Lin2016-hq	Rhsol	Rhi-milR-105		SRR1994877	6052857	1.81732	11	9	0.818182	UAGCAGAACACUGGGGAGAAGCAG	GUUCCAGGUGCCGGUAUGCUGG	UAGCAGAACACUGGGGAGAAGCAG	2	0	2	0	1 cited is ma	Yes	fn-111	mb-01011	ax-1001011	ku-01	ss-111111101100
PID0550	Lin2016-hq	Rhsol	Rhi-milR-105		SRR1994873	8626632	2.43432	21	19	0.904762	UAGCAGAACACUGGGGAGAAGCAG	GUUCCAGGUGCCGGUAUGCUGG	UAGCAGAACACUGGGGAGAAGCAG	5	0	5	0	1 cited is ma	Yes	fn-111	mb-01011	ax-1001011	ku-01	ss-101111101100
PID0550	Lin2016-hq	Rhsol	Rhi-milR-105		SRR1994874	9302637	1.28996	12	12	1	UAGCAGAACACUGGGGAGAAGCAG	GUUCCAGGUGCCGGUAUGCUGG	UAGCAGAACACUGGGGAGAAGCAG	2	0	2	0	1 cited is ma	Yes	fn-111	mb-01011	ax-1001011	ku-01	ss-101111101100
PID0550	Lin2016-hq	Rhsol	Rhi-milR-105		SRR1994872	9065193	1.43406	13	10	0.769231	CAGAACACUGGGGAGAAGCAGA	UGUUCCAGGUGCCGGUAUGCU	UAGCAGAACACUGGGGAGAAGCAG	0	0	3	0	3 cited not expressed	No	fn-001	mb-01110	ax-1001011	ku-01	ss-111110101100
PID0550	Lin2016-hq	Rhsol	Rhi-milR-105		SRR1994876	6833927	2.34126	16	14	0.875	CAGAACACUGGGGAGAAGCAGA	UGUUCCAGGUGCCGGUAUGCU	UAGCAGAACACUGGGGAGAAGCAG	0	0	4	0	3 cited not expressed	Yes	fn-111	mb-01010	ax-1001011	ku-01	ss-111111101100
PID0550	Lin2016-hq	Rhsol	Rhi-milR-105		SRR1994871	8692379	5.75217	50	43	0.86	UGAUCCUAGCAGAACACUGG	GGUGCCGGUAUGCUGGAUGCACU	UAGCAGAACACUGGGGAGAAGCAG	4	0	5	0	2 cited is not ma	Yes	fn-111	mb-01011	ax-1001011	ku-01	ss-101111101100
PID0550	Lin2016-hq	Rhsol	Rhi-milR-105		SRR1994875	4270606	1.87327	8	6	0.75	UAGCAGAACACUGGGGAGAAGCAGA	UGUUCCAGGUGCCGGUAUGCUGG	UAGCAGAACACUGGGGAGAAGCAG	0	0	2	0	3 cited not expressed	No	fn-101	mb-01011	ax-1001001	ku-01	ss-101010101100
PID0551	Lin2016-hq	Rhsol	Rhi-milR-151		SRR1994874	9302637	2527.35	23511	23511	1	UGUAUUUUGUUGAUCCGCUUGCAG	GGAAAAAUGGUAAGCAGGUCAACACAAUACACC	UGUAUUUUGUUGAUCCGCUUGCA	91	0	11450	0	2 cited is not ma	Yes	fn-111	mb-00111	ax-1001011	ku-11	ss-111111101010
PID0551	Lin2016-hq	Rhsol	Rhi-milR-151		SRR1994872	9065193	1743.81	15808	15808	1	UGUAUUUUGUUGAUCCGCUUGCAG	GGAAAAAUGGUAAGCAGGUCAACACAAUACACC	UGUAUUUUGUUGAUCCGCUUGCA	61	0	8308	0	2 cited is not ma	Yes	fn-111	mb-00111	ax-1001011	ku-11	ss-111111101010
PID0551	Lin2016-hq	Rhsol	Rhi-milR-151		SRR1994873	8626632	2370.45	20449	20448	0.999951	UGUAUUUUGUUGAUCCGCUUGCAG	GGAAAAAUGGUAAGCAGGUCAACACAAUACACC	UGUAUUUUGUUGAUCCGCUUGCA	68	0	10280	0	2 cited is not ma	Yes	fn-111	mb-00111	ax-1001011	ku-11	ss-111111101010
PID0551	Lin2016-hq	Rhsol	Rhi-milR-151		SRR1994875	4270606	3148.73	13447	13447	1	UGUAUUUUGUUGAUCCGCUUGCAG	GGAAAAAUGGUAAGCAGGUCAACACAAUACACC	UGUAUUUUGUUGAUCCGCUUGCA	44	0	5158	0	2 cited is not ma	Yes	fn-111	mb-00111	ax-1001011	ku-11	ss-111111101000
PID0551	Lin2016-hq	Rhsol	Rhi-milR-151		SRR1994871	8692379	8002.3	69559	69556	0.999957	UGUAUUUUGUUGAUCCGCUUGCAG	GGAAAAAUGGUAAGCAGGUCAACACAAUACACC	UGUAUUUUGUUGAUCCGCUUGCA	141	0	26027	0	2 cited is not ma	Yes	fn-111	mb-00011	ax-1001011	ku-11	ss-111111101000
PID0551	Lin2016-hq	Rhsol	Rhi-milR-151		SRR1994877	6052857	5116.26	30968	30968	1	UGUAUUUUGUUGAUCCGCUUGCAG	GGAAAAAUGGUAAGCAGGUCAACACAAUACACC	UGUAUUUUGUUGAUCCGCUUGCA	72	0	13283	0	2 cited is not ma	Yes	fn-111	mb-00011	ax-1001011	ku-11	ss-111111101000
PID0551	Lin2016-hq	Rhsol	Rhi-milR-151		SRR1994876	6833927	4157.93	28415	28414	0.999965	UGUAUUUUGUUGAUCCGCUUGCAG	GGAAAAAUGGUAAGCAGGUCAACACAAUACACC	UGUAUUUUGUUGAUCCGCUUGCA	90	0	11582	0	2 cited is not ma	Yes	fn-111	mb-00011	ax-1001011	ku-11	ss-111111101000
PID0552	Lin2016-hq	Rhsol	Rhi-milR-18		SRR1994877	6052857	283.998	1719	1546	0.89936	UAGAGAACUAUAACCAGACAAGGC	CUGCUGGUCAUGGUUAUCAAGU	AGAGAACUAUAACCAGACAAGGC	217	0	897	0	2 cited is not ma	Yes	fn-111	mb-01111	ax-1011111	ku-11	ss-111111111110
PID0552	Lin2016-hq	Rhsol	Rhi-milR-18		SRR1994872	9065193	130.83	1186	1060	0.893761	UAGAGAACUAUAACCAGACAAGGC	CUGCUGGUCAUGGUUAUCAAGU	AGAGAACUAUAACCAGACAAGGC	85	0	649	0	2 cited is not ma	Yes	fn-111	mb-01111	ax-1011011	ku-11	ss-111111111110
PID0552	Lin2016-hq	Rhsol	Rhi-milR-18		SRR1994876	6833927	187.886	1284	1133	0.882399	UAGAGAACUAUAACCAGACAAGGC	CUGCUGGUCAUGGUUAUCAAGU	AGAGAACUAUAACCAGACAAGGC	126	0	620	0	2 cited is not ma	Yes	fn-111	mb-01111	ax-1011011	ku-11	ss-111111111110
PID0552	Lin2016-hq	Rhsol	Rhi-milR-18		SRR1994875	4270606	137.217	586	523	0.892491	UAGAGAACUAUAACCAGACAAGGC	CUGCUGGUCAUGGUUAUCAAGU	AGAGAACUAUAACCAGACAAGGC	65	0	232	0	2 cited is not ma	Yes	fn-111	mb-01111	ax-1011011	ku-11	ss-111111111110
PID0552	Lin2016-hq	Rhsol	Rhi-milR-18		SRR1994873	8626632	94.1271	812	712	0.876847	UAGAGAACUAUAACCAGACAAGGC	CUGCUGGUCAUGGUUAUCAAGU	AGAGAACUAUAACCAGACAAGGC	60	0	410	0	2 cited is not ma	Yes	fn-111	mb-01111	ax-1011011	ku-11	ss-111111111110
PID0552	Lin2016-hq	Rhsol	Rhi-milR-18		SRR1994871	8692379	285.653	2483	2085	0.83971	UAGAGAACUAUAACCAGACAAGGC	CUGCUGGUCAUGGUUAUCAAGU	AGAGAACUAUAACCAGACAAGGC	421	0	492	0	2 cited is not ma	Yes	fn-111	mb-01111	ax-1011011	ku-11	ss-111111111110
PID0552	Lin2016-hq	Rhsol	Rhi-milR-18		SRR1994874	9302637	113.086	1052	885	0.841255	UAGAGAACUAUAACCAGACAAGGC	CUGCUGGUCAUGGUUAUCAAGU	AGAGAACUAUAACCAGACAAGGC	74	0	480	0	2 cited is not ma	Yes	fn-111	mb-01111	ax-1011011	ku-11	ss-111111111110
PID0553	Lin2016-hq	Rhsol	Rhi-milR-24		SRR1994872	9065193	2.86811	26	13	0.5	CCAGGAACUGCCAGCAGGGUGGG	AACCUUGCUGGCAACCUUGGCU	AGGAACUGCCAGCAGGGUGGGC	1	0	3	0	2 cited is not ma	No	fn-101	mb-01111	ax-1011011	ku-01	ss-111110101100
PID0553	Lin2016-hq	Rhsol	Rhi-milR-24		SRR1994875	4270606	7.49308	32	11	0.34375	CAGGAACUGCCAGCAGGGUGGGC	CAACCUUGCUGGCAACCUUGGC	AGGAACUGCCAGCAGGGUGGGC	0	0	2	1	3 cited not expressed	No	fn-101	mb-01011	ax-1101011	ku-01	ss-111110001101
PID0553	Lin2016-hq	Rhsol	Rhi-milR-24		SRR1994873	8626632	4.17312	36	18	0.5	CAGGAACUGCCAGCAGGGUGGGC	CAACCUUGCUGGCAACCUUGGC	AGGAACUGCCAGCAGGGUGGGC	0	0	3	1	3 cited not expressed	No	fn-101	mb-01011	ax-1101011	ku-01	ss-111110001101
PID0553	Lin2016-hq	Rhsol	Rhi-milR-24		SRR1994871	8692379	12.4247	108	54	0.5	CAGGAACUGCCAGCAGGGUGGG	AACCUUGCUGGCAACCUUGGC	AGGAACUGCCAGCAGGGUGGGC	7	0	8	0	2 cited is not ma	No	fn-101	mb-01011	ax-1011011	ku-01	ss-111110101100
PID0553	Lin2016-hq	Rhsol	Rhi-milR-24		SRR1994876	6833927	5.41416	37	17	0.459459	CAGGAACUGCCAGCAGGGUGGGC	CAACCUUGCUGGCAACCUUGGC	AGGAACUGCCAGCAGGGUGGGC	0	0	4	0	3 cited not expressed	No	fn-101	mb-01111	ax-1001011	ku-01	ss-111110001100
PID0553	Lin2016-hq	Rhsol	Rhi-milR-24		SRR1994877	6052857	4.13028	25	14	0.56	CAGGAACUGCCAGCAGGGUGGGC	CAACCUUGCUGGCAACCUUGGC	AGGAACUGCCAGCAGGGUGGGC	0	0	4	0	3 cited not expressed	No	fn-101	mb-01011	ax-1001011	ku-01	ss-111110101100
PID0553	Lin2016-hq	Rhsol	Rhi-milR-24		SRR1994874	9302637	4.62235	43	11	0.255814	CAGGAACUGCCAGCAGGGUGGGC	CAACCUUGCUGGCAACCUUGGC	AGGAACUGCCAGCAGGGUGGGC	0	0	3	0	3 cited not expressed	No	fn-101	mb-01011	ax-1001011	ku-01	ss-111110001100
PID0554	Lin2016-hq	Rhsol	Rhi-milR-95		SRR1994876	6833927	7.90175	54	54	1	UUAAAGACUGUUGUGAGAGAAGG	UUCUUCAACCUUGACAGUUAUUUUGUGU	UAAAGACUGUUGUGAGAGAAGGCG	1	0	6	0	2 cited is not ma	Yes	fn-111	mb-01011	ax-1001011	ku-01	ss-111111101000
PID0554	Lin2016-hq	Rhsol	Rhi-milR-95		SRR1994875	4270606	7.72724	33	33	1	UUAAAGACUGUUGUGAGAGAAGG	UUCUUCAACCUUGACAGUUAUUUUGUGU	UAAAGACUGUUGUGAGAGAAGGCG	3	0	4	0	2 cited is not ma	Yes	fn-111	mb-01011	ax-1001011	ku-01	ss-111111101000
PID0554	Lin2016-hq	Rhsol	Rhi-milR-95		SRR1994871	8692379	54.5305	474	466	0.983122	UUAAAGACUGUUGUGAGAGAAGG	UUCUUCAACCUUGACAGUUAUUUUGUGU	UAAAGACUGUUGUGAGAGAAGGCG	16	0	37	0	2 cited is not ma	Yes	fn-111	mb-01011	ax-1001011	ku-01	ss-111111101000
PID0554	Lin2016-hq	Rhsol	Rhi-milR-95		SRR1994872	9065193	4.85373	44	43	0.977273	UAAAGACUGUUGUGAGAGAAGGCG	CUUCUUCAACCUUGACAGUUAUUUUGUG	UAAAGACUGUUGUGAGAGAAGGCG	4	0	4	0	1 cited is ma	Yes	fn-111	mb-01011	ax-1001011	ku-01	ss-101111101000
PID0554	Lin2016-hq	Rhsol	Rhi-milR-95		SRR1994873	8626632	6.25969	54	54	1	UAAAGACUGUUGUGAGAGAAGGCG	CUUCUUCAACCUUGACAGUUAUUUUGUG	UAAAGACUGUUGUGAGAGAAGGCG	4	0	4	0	1 cited is ma	Yes	fn-111	mb-01011	ax-1001011	ku-01	ss-101111101000
PID0554	Lin2016-hq	Rhsol	Rhi-milR-95		SRR1994874	9302637	6.12729	57	53	0.929825	UAAAGACUGUUGUGAGAGAAGGC	CUUCUUCAACCUUGACAGUUAUUUUGUG	UAAAGACUGUUGUGAGAGAAGGCG	2	0	6	0	2 cited is not ma	Yes	fn-111	mb-01011	ax-1001011	ku-01	ss-111111101000
PID0554	Lin2016-hq	Rhsol	Rhi-milR-95		SRR1994877	6052857	9.08662	55	55	1	UUAAAGACUGUUGUGAGAGAAGGC	CUUCUUCAACCUUGACAGUUAUUUUGUGU	UAAAGACUGUUGUGAGAGAAGGCG	3	0	5	0	2 cited is not ma	Yes	fn-111	mb-01011	ax-1001011	ku-01	ss-101111101000
PID0555	Lin2016-hq	Rhsol	Rhi-milR-102		SRR1994871	8692379	8.16807	71	31	0.43662	UACUUCCAGUUGACUUUGAAUGC	AGUCAGAGUCAAUUAAGUUGU	UACUUCCAGUUGACUUUGAAUG	0	0	11	0	3 cited not expressed	No	fn-101	mb-00111	ax-1011011	ku-01	ss-111110011000
PID0555	Lin2016-hq	Rhsol	Rhi-milR-102		SRR1994874	9302637	3.43988	32	18	0.5625	UACUUCCAGUUGACUUUGAAUGC	AGUCAGAGUCAAUUAAGUUGU	UACUUCCAGUUGACUUUGAAUG	0	0	8	0	3 cited not expressed	No	fn-101	mb-00011	ax-1011011	ku-01	ss-111110111000
PID0555	Lin2016-hq	Rhsol	Rhi-milR-102		SRR1994876	6833927	4.82885	33	14	0.424242	UACUUCCAGUUGACUUUGAAUGC	AGUCAGAGUCAAUUAAGUUGU	UACUUCCAGUUGACUUUGAAUG	0	0	6	0	3 cited not expressed	No	fn-101	mb-00011	ax-1011011	ku-01	ss-111110011000
PID0555	Lin2016-hq	Rhsol	Rhi-milR-102		SRR1994875	4270606	4.21486	18	7	0.388889	UACUUCCAGUUGACUUUGAAUGC	AGUCAGAGUCAAUUAAGUUGU	UACUUCCAGUUGACUUUGAAUG	0	0	3	0	3 cited not expressed	No	fn-101	mb-00011	ax-1011011	ku-01	ss-111110011000
PID0555	Lin2016-hq	Rhsol	Rhi-milR-102		SRR1994873	8626632	2.3184	20	6	0.3	UACUUCCAGUUGACUUUGAAUGC	AGUCAGAGUCAAUUAAGUUGU	UACUUCCAGUUGACUUUGAAUG	0	0	5	0	3 cited not expressed	No	fn-101	mb-00011	ax-1011011	ku-01	ss-111110011000
PID0555	Lin2016-hq	Rhsol	Rhi-milR-102		SRR1994877	6052857	4.13028	25	12	0.48	UACUUCCAGUUGACUUUGAAUGC	AGUCAGAGUCAAUUAAGUUGU	UACUUCCAGUUGACUUUGAAUG	0	0	8	0	3 cited not expressed	No	fn-101	mb-00011	ax-1011011	ku-01	ss-111110011000
PID0555	Lin2016-hq	Rhsol	Rhi-milR-102		SRR1994872	9065193	0.772184	7	2	0.285714	UACUUCCAGUUGACUUUGAAUGC	AGUCAGAGUCAAUUAAGUUGU	UACUUCCAGUUGACUUUGAAUG	0	0	1	0	3 cited not expressed	No	fn-001	mb-00011	ax-1011011	ku-01	ss-110110011000
PID0556	Lin2016-hq	Rhsol	Rhi-milR-87		SRR1994875	4270606	82.8922	354	354	1	GUAACAAGUGACGGACAGGGCUA	UCCCAUUGUCCGUGCUUGCCGU	GUAACAAGUGACGGACAGGGCUA	54	0	54	0	1 cited is ma	Yes	fn-111	mb-01111	ax-1001011	ku-01	ss-111111101100
PID0556	Lin2016-hq	Rhsol	Rhi-milR-87		SRR1994876	6833927	94.0894	643	642	0.998445	GUAACAAGUGACGGACAGGGCUA	UCCCAUUGUCCGUGCUUGCCGU	GUAACAAGUGACGGACAGGGCUA	79	0	79	0	1 cited is ma	Yes	fn-111	mb-01011	ax-1001011	ku-01	ss-111111101100
PID0556	Lin2016-hq	Rhsol	Rhi-milR-87		SRR1994871	8692379	91.3444	794	794	1	GUAACAAGUGACGGACAGGGCUA	UCCCAUUGUCCGUGCUUGCCGU	GUAACAAGUGACGGACAGGGCUA	121	0	121	0	1 cited is ma	Yes	fn-111	mb-01011	ax-1001011	ku-01	ss-111111101100
PID0556	Lin2016-hq	Rhsol	Rhi-milR-87		SRR1994872	9065193	140.538	1274	1274	1	GUAACAAGUGACGGACAGGGCUA	UCCCAUUGUCCGUGCUUGCCGU	GUAACAAGUGACGGACAGGGCUA	142	0	142	0	1 cited is ma	Yes	fn-111	mb-01011	ax-1001011	ku-01	ss-101111101100
PID0556	Lin2016-hq	Rhsol	Rhi-milR-87		SRR1994873	8626632	130.874	1129	1128	0.999114	UCGUAACAAGUGACGGACAGGGC	CCAUUGUCCGUGCUUGCCGUGG	GUAACAAGUGACGGACAGGGCUA	106	0	174	10	2 cited is not ma	Yes	fn-111	mb-01111	ax-1101011	ku-11	ss-111111101101
PID0556	Lin2016-hq	Rhsol	Rhi-milR-87		SRR1994877	6052857	216.096	1308	1308	1	UCGUAACAAGUGACGGACAGGGC	CCAUUGUCCGUGCUUGCCGUGG	GUAACAAGUGACGGACAGGGCUA	111	0	168	11	2 cited is not ma	Yes	fn-111	mb-11011	ax-1101011	ku-11	ss-111111101101
PID0556	Lin2016-hq	Rhsol	Rhi-milR-87		SRR1994874	9302637	77.5049	721	721	1	UCGUAACAAGUGACGGACAGGGC	CCAUUGUCCGUGCUUGCCGUGG	GUAACAAGUGACGGACAGGGCUA	65	0	119	6	2 cited is not ma	Yes	fn-111	mb-01111	ax-1101011	ku-01	ss-111111101101
PID0557	Lin2016-hq	Rhsol	Rhi-milR-67		SRR1994874	9302637	1.93494	18	18	1	CGAGCUGUUUUCGUACUUGUGGACU	GUCUGUUUGGCGACGAUGGCCGGU	GAGCUGUUUUCGUACUUGUGGACU	2	1	6	1	2 cited is not ma	Yes	fn-111	mb-01111	ax-1101001	ku-01	ss-101011101111
PID0557	Lin2016-hq	Rhsol	Rhi-milR-67		SRR1994872	9065193	3.75061	34	34	1	CGAGCUGUUUUCGUACUUGUGGACU	GUCUGUUUGGCGACGAUGGCCGGU	GAGCUGUUUUCGUACUUGUGGACU	0	0	20	0	3 cited not expressed	Yes	fn-111	mb-01111	ax-1001001	ku-01	ss-101011101110
PID0557	Lin2016-hq	Rhsol	Rhi-milR-67		SRR1994876	6833927	1.17063	8	8	1	CGAGCUGUUUUCGUACUUGUGGACU	GUCUGUUUGGCGACGAUGGCCGGU	GAGCUGUUUUCGUACUUGUGGACU	1	0	4	0	2 cited is not ma	Yes	fn-111	mb-01111	ax-1001001	ku-01	ss-101011101110
PID0557	Lin2016-hq	Rhsol	Rhi-milR-67		SRR1994873	8626632	3.70944	32	32	1	CGAGCUGUUUUCGUACUUGUGGACU	GUCUGUUUGGCGACGAUGGCCGGU	GAGCUGUUUUCGUACUUGUGGACU	1	0	12	0	2 cited is not ma	Yes	fn-111	mb-01111	ax-1001001	ku-01	ss-101011101110
PID0557	Lin2016-hq	Rhsol	Rhi-milR-67		SRR1994871	8692379	0.460173	4	4	1	CGAGCUGUUUUCGUACUUGUGGACU	GUCUGUUUGGCGACGAUGGCCGGU	GAGCUGUUUUCGUACUUGUGGACU	0	0	3	0	3 cited not expressed	No	fn-011	mb-01011	ax-1001101	ku-01	ss-101011101110
PID0557	Lin2016-hq	Rhsol	Rhi-milR-67		SRR1994875	4270606	0.702476	3	3	1	GCUGUUUUCGUACUUGUGGACU	GUCUGUUUGGCGACGAUGGCC	GAGCUGUUUUCGUACUUGUGGACU	0	0	1	0	3 cited not expressed	No	fn-011	mb-01011	ax-1001011	ku-01	ss-100111101100
PID0557	Lin2016-hq	Rhsol	Rhi-milR-67		SRR1994877	6052857	0.330422	2	2	1	GAGCUGUUUUCGUACUUGUGGACU	GUCUGUUUGGCGACGAUGGCCGG	GAGCUGUUUUCGUACUUGUGGACU	1	0	1	0	1 cited is ma	No	fn-011	mb-01011	ax-1001011	ku-01	ss-100111101100
PID0558	Lin2016-hq	Rhsol	Rhi-milR-70		SRR1994871	8692379	1.61061	14	14	1	GAUGAUCUUAAGGCUGCAUACGA	GUAUGCAUGCUUCAAAUCGUCCUG	GAUGAUCUUAAGGCUGCAUACGA	2	0	2	0	1 cited is ma	No	fn-011	mb-01111	ax-1011011	ku-01	ss-101111111100
PID0558	Lin2016-hq	Rhsol	Rhi-milR-70		SRR1994874	9302637	1.39745	13	13	1	GAUGAUCUUAAGGCUGCAUACGA	GUAUGCAUGCUUCAAAUCGUCCUG	GAUGAUCUUAAGGCUGCAUACGA	4	0	4	0	1 cited is ma	Yes	fn-111	mb-01011	ax-1011011	ku-01	ss-101111111110
PID0558	Lin2016-hq	Rhsol	Rhi-milR-70		SRR1994873	8626632	7.65073	66	66	1	GAUGAUCUUAAGGCUGCAUACGA	GUAUGCAUGCUUCAAAUCGUCCUG	GAUGAUCUUAAGGCUGCAUACGA	20	0	20	0	1 cited is ma	Yes	fn-111	mb-01011	ax-1011011	ku-01	ss-101111111100
PID0558	Lin2016-hq	Rhsol	Rhi-milR-70		SRR1994876	6833927	3.21923	22	22	1	AGAUGAUCUUAAGGCUGCAUACGA	GUAUGCAUGCUUCAAAUCGUCCUGU	GAUGAUCUUAAGGCUGCAUACGA	0	0	14	0	3 cited not expressed	Yes	fn-111	mb-01011	ax-1011011	ku-01	ss-111111111110
PID0558	Lin2016-hq	Rhsol	Rhi-milR-70		SRR1994877	6052857	0.165211	1	1	1	CCCCAGAUGAUCUUAAGGCUGCAUACGA	GUAUGCAUGCUUCAAAUCGUCCUG	GAUGAUCUUAAGGCUGCAUACGA	0	0	1	0	3 cited not expressed	No	fn-011	mb-00011	ax-1011101	ku-01	ss-100011111110
PID0558	Lin2016-hq	Rhsol	Rhi-milR-70		SRR1994872	9065193	3.19905	29	29	1	CCCCAGAUGAUCUUAAGGCUGCAUACGA	GUAUGCAUGCUUCAAAUCGUCCUG	GAUGAUCUUAAGGCUGCAUACGA	5	0	7	0	2 cited is not ma	Yes	fn-111	mb-00011	ax-1011001	ku-01	ss-101011111100
PID0558	Lin2016-hq	Rhsol	Rhi-milR-70		SRR1994875	4270606	0.468318	2	2	1	AGAUGAUCUUAAGGCUGCAUACGACA	ACGUAUGCAUGCUUCAAAUCGUCCUGU	GAUGAUCUUAAGGCUGCAUACGA	0	0	1	0	3 cited not expressed	No	fn-011	mb-01011	ax-1011001	ku-01	ss-100011101100
PID0559	Lin2016-hq	Rhsol	Rhi-milR-152		SRR1994872	9065193	9.1559	83	47	0.566265	UGUGGCUUGGAGCUGGCAAGGAG	AUCAUCUUGUUCUGCAGCUCUAAGCUCUACA	UGUGGCUUGGAGCUGGCAAGGA	2	0	34	0	2 cited is not ma	No	fn-101	mb-00111	ax-1001011	ku-01	ss-111110101000
PID0559	Lin2016-hq	Rhsol	Rhi-milR-152		SRR1994876	6833927	6.87745	47	24	0.510638	UGUGGCUUGGAGCUGGCAAGGAG	AUCAUCUUGUUCUGCAGCUCUAAGCUCUACA	UGUGGCUUGGAGCUGGCAAGGA	0	0	19	0	3 cited not expressed	No	fn-101	mb-00111	ax-1001011	ku-01	ss-111110101000
PID0559	Lin2016-hq	Rhsol	Rhi-milR-152		SRR1994875	4270606	0.702476	3	0	0	UGUGGCUUGGAGCUGGCAAGGA	CUUGUUCUGCAGCUCUAAGCUCUACA	UGUGGCUUGGAGCUGGCAAGGA	0	0	0	0	3 cited not expressed	No	fn-001	mb-01011	ax-1001011	ku-01	ss-110111001000
PID0559	Lin2016-hq	Rhsol	Rhi-milR-152		SRR1994873	8626632	8.92585	77	31	0.402597	UGUGGCUUGGAGCUGGCAAGGAG	AUCAUCUUGUUCUGCAGCUCUAAGCUCUACA	UGUGGCUUGGAGCUGGCAAGGA	0	0	28	0	3 cited not expressed	No	fn-101	mb-00111	ax-1001011	ku-01	ss-111110001000
PID0559	Lin2016-hq	Rhsol	Rhi-milR-152		SRR1994871	8692379	2.53095	22	15	0.681818	UGUGGCUUGGAGCUGGCAAGGAG	AUCAUCUUGUUCUGCAGCUCUAAGCUCUACA	UGUGGCUUGGAGCUGGCAAGGA	0	0	11	0	3 cited not expressed	No	fn-101	mb-00011	ax-1001011	ku-01	ss-111110101000
PID0559	Lin2016-hq	Rhsol	Rhi-milR-152		SRR1994874	9302637	7.41725	69	31	0.449275	UGUGGCUUGGAGCUGGCAAGGAG	AUCAUCUUGUUCUGCAGCUCUAAGCUCUACA	UGUGGCUUGGAGCUGGCAAGGA	1	0	16	0	2 cited is not ma	No	fn-101	mb-00111	ax-1001011	ku-01	ss-111110001000
PID0559	Lin2016-hq	Rhsol	Rhi-milR-152		SRR1994877	6052857	11.0692	67	23	0.343284	UGUGGCUUGGAGCUGGCAAGGAG	AUCAUCUUGUUCUGCAGCUCUAAGCUCUACA	UGUGGCUUGGAGCUGGCAAGGA	0	0	16	0	3 cited not expressed	No	fn-101	mb-00011	ax-1001011	ku-01	ss-111110001000
PID0560	Lin2016-hq	Rhsol	Rhi-milR-172		SRR1994876	6833927	2.34126	16	15	0.9375	UUGUGGGGACUCUGUUAUAGGA	CUGUGACUUGGGCACCCACUGCC	UUGUGGGGACUCUGUUAUAGG	1	0	9	0	2 cited is not ma	Yes	fn-111	mb-01111	ax-1001011	ku-01	ss-111111101110
PID0560	Lin2016-hq	Rhsol	Rhi-milR-172		SRR1994873	8626632	2.78208	24	22	0.916667	UUGUGGGGACUCUGUUAUAGGA	CUGUGACUUGGGCACCCACUGCC	UUGUGGGGACUCUGUUAUAGG	0	0	10	0	3 cited not expressed	Yes	fn-111	mb-01111	ax-1001011	ku-01	ss-111111101110
PID0560	Lin2016-hq	Rhsol	Rhi-milR-172		SRR1994877	6052857	2.47817	15	13	0.866667	UUGUGGGGACUCUGUUAUAGGA	CUGUGACUUGGGCACCCACUGCC	UUGUGGGGACUCUGUUAUAGG	1	0	6	0	2 cited is not ma	Yes	fn-111	mb-01111	ax-1001011	ku-01	ss-111111101110
PID0560	Lin2016-hq	Rhsol	Rhi-milR-172		SRR1994872	9065193	3.30936	30	26	0.866667	UUGUGGGGACUCUGUUAUAGGA	CUGUGACUUGGGCACCCACUGCC	UUGUGGGGACUCUGUUAUAGG	1	0	11	0	2 cited is not ma	Yes	fn-111	mb-01011	ax-1001011	ku-01	ss-111111101100
PID0560	Lin2016-hq	Rhsol	Rhi-milR-172		SRR1994875	4270606	0.702476	3	3	1	UUGUGGGGACUCUGUUAUAGGA	CUGUGACUUGGGCACCCACUGCC	UUGUGGGGACUCUGUUAUAGG	0	0	2	0	3 cited not expressed	No	fn-011	mb-01011	ax-1001011	ku-01	ss-101111101110
PID0560	Lin2016-hq	Rhsol	Rhi-milR-172		SRR1994874	9302637	2.04243	19	19	1	UUGUGGGGACUCUGUUAUAGGA	CUGUGACUUGGGCACCCACUGCC	UUGUGGGGACUCUGUUAUAGG	0	1	5	0	3 cited not expressed	Yes	fn-111	mb-01011	ax-1001011	ku-01	ss-111111101100
PID0560	Lin2016-hq	Rhsol	Rhi-milR-172		SRR1994871	8692379	1.26548	11	10	0.909091	UUGUGGGGACUCUGUUAUAGGAC	UCUGUGACUUGGGCACCCACUGCC	UUGUGGGGACUCUGUUAUAGG	0	0	2	0	3 cited not expressed	Yes	fn-111	mb-01111	ax-1001011	ku-01	ss-111111101100
PID0561	Lin2016-hq	Rhsol	Rhi-milR-42		SRR1994876	6833927	3.0729	21	21	1	CACGGUCUGUCCACCAAGAGC	UCCUGGAUCGGAGCAGGUCCGUGCC	CACGGUCUGUCCACCAAGAG	0	0	11	0	3 cited not expressed	Yes	fn-111	mb-01011	ax-1011111	ku-01	ss-111111101010
PID0561	Lin2016-hq	Rhsol	Rhi-milR-42		SRR1994877	6052857	0.991267	6	5	0.833333	CACGGUCUGUCCACCAAGAGC	UCCUGGAUCGGAGCAGGUCCGUGCC	CACGGUCUGUCCACCAAGAG	0	0	3	0	3 cited not expressed	Yes	fn-111	mb-01011	ax-1011011	ku-01	ss-111111101010
PID0561	Lin2016-hq	Rhsol	Rhi-milR-42		SRR1994875	4270606	4.91733	21	21	1	CACGGUCUGUCCACCAAGAGC	UCCUGGAUCGGAGCAGGUCCGUGCC	CACGGUCUGUCCACCAAGAG	0	0	7	0	3 cited not expressed	Yes	fn-111	mb-01011	ax-1011011	ku-01	ss-111111101010
PID0561	Lin2016-hq	Rhsol	Rhi-milR-42		SRR1994874	9302637	1.28996	12	12	1	CACGGUCUGUCCACCAAGAGC	UCCUGGAUCGGAGCAGGUCCGUGCC	CACGGUCUGUCCACCAAGAG	0	0	3	0	3 cited not expressed	Yes	fn-111	mb-01011	ax-1011011	ku-01	ss-101111101000
PID0561	Lin2016-hq	Rhsol	Rhi-milR-42		SRR1994873	8626632	8.92585	77	77	1	CCCACGGUCUGUCCACCAAGAGC	UCCUGGAUCGGAGCAGGUCCGUGCCAC	CACGGUCUGUCCACCAAGAG	0	0	17	0	3 cited not expressed	Yes	fn-111	mb-01011	ax-1001011	ku-01	ss-101111101010
PID0561	Lin2016-hq	Rhsol	Rhi-milR-42		SRR1994872	9065193	6.94966	63	63	1	CCCACGGUCUGUCCACCAAGAGC	UCCUGGAUCGGAGCAGGUCCGUGCCAC	CACGGUCUGUCCACCAAGAG	0	0	15	0	3 cited not expressed	Yes	fn-111	mb-01111	ax-1001011	ku-01	ss-101111101000
PID0561	Lin2016-hq	Rhsol	Rhi-milR-42		SRR1994871	8692379	0.460173	4	4	1	CUUCCCACGGUCUGUCCACCAAGAGCAAG	CACUCCUGGAUCGGAGCAGGUCCGUGCCACCAU	CACGGUCUGUCCACCAAGAG	0	0	1	0	3 cited not expressed	No	fn-011	mb-01010	ax-1001001	ku-01	ss-100011101000
PID0562	Lin2016-hq	Rhsol	Rhi-milR-100		SRR1994871	8692379	17.8317	155	30	0.193548	UUAAUUGUUUGUACUCAGUGGC	UAACUGCUACUGUCAUGACC	UAAUUGUUUGUACUCAGUGGC	0	1	12	4	3 cited not expressed	No	fn-101	mb-01111	ax-1101011	ku-01	ss-111111001101
PID0562	Lin2016-hq	Rhsol	Rhi-milR-100		SRR1994872	9065193	2.53718	23	5	0.217391	UUAAUUGUUUGUACUCAGUGGC	UAACUGCUACUGUCAUGACC	UAAUUGUUUGUACUCAGUGGC	1	0	3	1	2 cited is not ma	No	fn-001	mb-01111	ax-1101011	ku-01	ss-111110001101
PID0562	Lin2016-hq	Rhsol	Rhi-milR-100		SRR1994876	6833927	4.09721	28	12	0.428571	UUAAUUGUUUGUACUCAGUGGC	UAACUGCUACUGUCAUGACC	UAAUUGUUUGUACUCAGUGGC	1	0	5	3	2 cited is not ma	No	fn-101	mb-01111	ax-1101011	ku-01	ss-111110001101
PID0562	Lin2016-hq	Rhsol	Rhi-milR-100		SRR1994875	4270606	5.61981	24	9	0.375	UUAAUUGUUUGUACUCAGUGGC	UAACUGCUACUGUCAUGACC	UAAUUGUUUGUACUCAGUGGC	0	1	5	1	3 cited not expressed	No	fn-101	mb-01111	ax-1101011	ku-01	ss-111110001101
PID0562	Lin2016-hq	Rhsol	Rhi-milR-100		SRR1994874	9302637	4.08486	38	7	0.184211	UUAAUUGUUUGUACUCAGUGGC	UAACUGCUACUGUCAUGACC	UAAUUGUUUGUACUCAGUGGC	0	0	6	0	3 cited not expressed	No	fn-101	mb-01011	ax-1001011	ku-01	ss-111111001100
PID0562	Lin2016-hq	Rhsol	Rhi-milR-100		SRR1994877	6052857	6.27803	38	8	0.210526	UUAAUUGUUUGUACUCAGUGGC	UAACUGCUACUGUCAUGACC	UAAUUGUUUGUACUCAGUGGC	0	0	4	0	3 cited not expressed	No	fn-101	mb-01011	ax-1001011	ku-01	ss-111110001100
PID0562	Lin2016-hq	Rhsol	Rhi-milR-100		SRR1994873	8626632	2.898	25	5	0.2	UACUGUCAUGACCCACUCC	AGGGGUUAAUUGUUUGUACUC	UAAUUGUUUGUACUCAGUGGC	0	0	1	0	3 cited not expressed	No	fn-001	mb-01111	ax-1001001	ku-01	ss-110010001100
PID0563	Lin2016-hq	Rhsol	Rhi-milR-27		SRR1994872	9065193	11.1415	101	101	1	GAAAGGAGACUAGAGAACAAGUUG	ACUUUGUCGCUAAGCUUCUUUCAC	AGGAGACUAGAGAACAAGUUGU	0	0	9	0	3 cited not expressed	Yes	fn-111	mb-01011	ax-1001011	ku-01	ss-101111101100
PID0563	Lin2016-hq	Rhsol	Rhi-milR-27		SRR1994873	8626632	5.10048	44	44	1	GAAAGGAGACUAGAGAACAAGUUG	ACUUUGUCGCUAAGCUUCUUUCAC	AGGAGACUAGAGAACAAGUUGU	0	0	3	0	3 cited not expressed	Yes	fn-111	mb-01011	ax-1001011	ku-01	ss-101111101100
PID0563	Lin2016-hq	Rhsol	Rhi-milR-27		SRR1994875	4270606	1.40495	6	6	1	AGGAGACUAGAGAACAAGUUGU	GACUUUGUCGCUAAGCUUCUUU	AGGAGACUAGAGAACAAGUUGU	2	0	2	0	1 cited is ma	Yes	fn-111	mb-01011	ax-1011011	ku-01	ss-111111111100
PID0563	Lin2016-hq	Rhsol	Rhi-milR-27		SRR1994876	6833927	0.877973	6	6	1	AAGGAGACUAGAGAACAAGUUGU	GACUUUGUCGCUAAGCUUCUUUC	AGGAGACUAGAGAACAAGUUGU	0	0	2	0	3 cited not expressed	No	fn-011	mb-01011	ax-1011011	ku-01	ss-101111111100
PID0563	Lin2016-hq	Rhsol	Rhi-milR-27		SRR1994877	6052857	1.15648	7	7	1	ACAGAAAGGAGACUAGAGAACA	GUCGCUAAGCUUCUUUCACUCA	AGGAGACUAGAGAACAAGUUGU	0	0	2	0	3 cited not expressed	No	fn-011	mb-01010	ax-1001011	ku-01	ss-101111101100
PID0563	Lin2016-hq	Rhsol	Rhi-milR-27		SRR1994874	9302637	1.50495	14	14	1	GAAAGGAGACUAGAGAACAAGUUGU	GACUUUGUCGCUAAGCUUCUUUCAC	AGGAGACUAGAGAACAAGUUGU	0	0	2	0	3 cited not expressed	No	fn-011	mb-01011	ax-1001001	ku-01	ss-101011101100
PID0563	Lin2016-hq	Rhsol	Rhi-milR-27		SRR1994871	8692379	0.460173	4	4	1	AGGAGACUAGAGAACAAGUUGUUGUAG	GGAUGACUUUGUCGCUAAGCUUCUUU	AGGAGACUAGAGAACAAGUUGU	0	0	1	0	3 cited not expressed	No	fn-011	mb-01011	ax-1001001	ku-01	ss-100011101100
PID0565	Lin2016-hq	Rhsol	Rhi-milR-30		SRR1994872	9065193	176.389	1599	873	0.545966	UAGGGACUGUCCAAUGCUAGGUGG	ACCUGCUUGCAGAAAGCCUGCU	AGGGACUGUCCAAUGCUAGGUG	6	0	164	0	2 cited is not ma	No	fn-101	mb-01011	ax-1011011	ku-01	ss-111110111100
PID0565	Lin2016-hq	Rhsol	Rhi-milR-30		SRR1994876	6833927	258.124	1764	541	0.306689	UAGGGACUGUCCAAUGCUAGGUGG	ACCUGCUUGCAGAAAGCCUGCU	AGGGACUGUCCAAUGCUAGGUG	7	0	140	0	2 cited is not ma	No	fn-101	mb-01011	ax-1011011	ku-11	ss-111110011100
PID0565	Lin2016-hq	Rhsol	Rhi-milR-30		SRR1994875	4270606	291.528	1245	529	0.4249	UAGGGACUGUCCAAUGCUAGGUGG	ACCUGCUUGCAGAAAGCCUGCU	AGGGACUGUCCAAUGCUAGGUG	3	0	122	0	2 cited is not ma	No	fn-101	mb-01011	ax-1011011	ku-11	ss-111110011100
PID0565	Lin2016-hq	Rhsol	Rhi-milR-30		SRR1994871	8692379	886.409	7705	2086	0.270733	UAGGGACUGUCCAAUGCUAGGUGG	ACCUGCUUGCAGAAAGCCUGCU	AGGGACUGUCCAAUGCUAGGUG	64	0	392	0	2 cited is not ma	No	fn-101	mb-01011	ax-1011011	ku-11	ss-111110011100
PID0565	Lin2016-hq	Rhsol	Rhi-milR-30		SRR1994874	9302637	237.137	2206	940	0.426111	UAGGGACUGUCCAAUGCUAGGUGG	ACCUGCUUGCAGAAAGCCUGCU	AGGGACUGUCCAAUGCUAGGUG	10	0	227	0	2 cited is not ma	No	fn-101	mb-01011	ax-1011011	ku-11	ss-111110011100
PID0565	Lin2016-hq	Rhsol	Rhi-milR-30		SRR1994877	6052857	416.663	2522	705	0.27954	UAGGGACUGUCCAAUGCUAGGUGG	ACCUGCUUGCAGAAAGCCUGCU	AGGGACUGUCCAAUGCUAGGUG	7	0	160	0	2 cited is not ma	No	fn-101	mb-01011	ax-1011011	ku-11	ss-111110011100
PID0565	Lin2016-hq	Rhsol	Rhi-milR-30		SRR1994873	8626632	198.107	1709	764	0.447045	UAGGGACUGUCCAAUGCUAGGUGG	ACCUGCUUGCAGAAAGCCUGCU	AGGGACUGUCCAAUGCUAGGUG	4	0	155	0	2 cited is not ma	No	fn-101	mb-01011	ax-1011011	ku-01	ss-111110011100
PID0567	Lin2016-hq	Rhsol	Rhi-milR-76		SRR1994873	8626632	1.62288	14	14	1	GGCGGAUCUCGAACUCGAAGC	UUUGGGCCGAACUCCAGCUCC	GCGGAUCUCGAACUCGAAGC	0	0	6	0	3 cited not expressed	Yes	fn-111	mb-01011	ax-1011011	ku-01	ss-111111101100
PID0567	Lin2016-hq	Rhsol	Rhi-milR-76		SRR1994872	9065193	3.52999	32	32	1	GGCGGAUCUCGAACUCGAAGC	UUUGGGCCGAACUCCAGCUCC	GCGGAUCUCGAACUCGAAGC	0	0	5	0	3 cited not expressed	Yes	fn-111	mb-01011	ax-1011011	ku-01	ss-101111101100
PID0567	Lin2016-hq	Rhsol	Rhi-milR-76		SRR1994876	6833927	1.0243	7	7	1	UGCUUUGGGCCGAACUCCAGC	GGAUCUCGAACUCGAAGCUG	GCGGAUCUCGAACUCGAAGC	1	0	2	0	2 cited is not ma	No	fn-011	mb-01111	ax-1011011	ku-01	ss-101111111100
PID0567	Lin2016-hq	Rhsol	Rhi-milR-76		SRR1994874	9302637	0.537482	5	5	1	CGGAUCUCGAACUCGAAGCUG	UGCUUUGGGCCGAACUCCAGCU	GCGGAUCUCGAACUCGAAGC	0	0	1	0	3 cited not expressed	No	fn-011	mb-01011	ax-1011011	ku-01	ss-110111111100
PID0567	Lin2016-hq	Rhsol	Rhi-milR-76		SRR1994871	8692379	0.69026	6	6	1	GCGGAUCUCGAACUCGAAGC	UUUGGGCCGAACUCCAGCUC	GCGGAUCUCGAACUCGAAGC	1	0	1	0	1 cited is ma	No	fn-011	mb-01011	ax-1011011	ku-01	ss-100111111100
PID0567	Lin2016-hq	Rhsol	Rhi-milR-76		SRR1994875	4270606	1.63911	7	7	1	UGGGCCGAACUCCAGCUCCCCC	CAUGGCGGAUCUCGAACUCGAA	GCGGAUCUCGAACUCGAAGC	0	0	1	0	3 cited not expressed	No	fn-011	mb-01010	ax-1001011	ku-01	ss-110111101100
PID0567	Lin2016-hq	Rhsol	Rhi-milR-76		SRR1994877	6052857	0	0	0	NA	GCGGAUCUCGAACUCGAAGC	UUUGGGCCGAACUCCAGCUC	GCGGAUCUCGAACUCGAAGC	0	0	0	0	4 locus not expressed	No	fn-001	mb-01011	ax-1011011	ku-01	ss-000110011100
PID0568	Lin2016-hq	Rhsol	Rhi-milR-55		SRR1994876	6833927	3.80455	26	25	0.961538	CGGCUACUUGGGCGAUCUCGCUG	GCAGUUCGAUCAAGGGCCAAA	CGGCUACUUGGGCGAUCUCGCU	1	0	5	0	2 cited is not ma	Yes	fn-111	mb-01111	ax-1011011	ku-01	ss-101111101100
PID0568	Lin2016-hq	Rhsol	Rhi-milR-55		SRR1994873	8626632	14.49	125	125	1	CGGCUACUUGGGCGAUCUCGCUG	GCAGUUCGAUCAAGGGCCAAA	CGGCUACUUGGGCGAUCUCGCU	2	0	24	0	2 cited is not ma	Yes	fn-111	mb-01111	ax-1011011	ku-01	ss-101111101100
PID0568	Lin2016-hq	Rhsol	Rhi-milR-55		SRR1994874	9302637	2.79491	26	26	1	CGGCUACUUGGGCGAUCUCGCUG	GCAGUUCGAUCAAGGGCCAAA	CGGCUACUUGGGCGAUCUCGCU	1	0	5	0	2 cited is not ma	Yes	fn-111	mb-01111	ax-1011011	ku-01	ss-101111101100
PID0568	Lin2016-hq	Rhsol	Rhi-milR-55		SRR1994872	9065193	27.6883	251	251	1	CGGCUACUUGGGCGAUCUCGCUG	GCAGUUCGAUCAAGGGCCAAA	CGGCUACUUGGGCGAUCUCGCU	8	0	55	0	2 cited is not ma	Yes	fn-111	mb-01011	ax-1011011	ku-01	ss-101111101100
PID0568	Lin2016-hq	Rhsol	Rhi-milR-55		SRR1994875	4270606	3.74654	16	16	1	CGGCUACUUGGGCGAUCUCGCUG	GCAGUUCGAUCAAGGGCCAAA	CGGCUACUUGGGCGAUCUCGCU	2	0	3	0	2 cited is not ma	Yes	fn-111	mb-01011	ax-1011011	ku-01	ss-101111101100
PID0568	Lin2016-hq	Rhsol	Rhi-milR-55		SRR1994871	8692379	1.15043	10	10	1	CGGCUACUUGGGCGAUCUCGCUG	GCAGUUCGAUCAAGGGCCAAA	CGGCUACUUGGGCGAUCUCGCU	0	0	3	0	3 cited not expressed	No	fn-011	mb-01011	ax-1011011	ku-01	ss-101111101100
PID0568	Lin2016-hq	Rhsol	Rhi-milR-55		SRR1994877	6052857	0.330422	2	2	1	CGGCUACUUGGGCGAUCUCGCUGU	GGCAGUUCGAUCAAGGGCCAAA	CGGCUACUUGGGCGAUCUCGCU	0	0	1	0	3 cited not expressed	No	fn-011	mb-01011	ax-1001011	ku-01	ss-100111101100
PID0569	Lin2016-hq	Rhsol	Rhi-milR-107		SRR1994872	9065193	2.64749	24	9	0.375	UAGGCUACUUGGACCACCUGGAGG	CCCAGUCUGUCACGAGUUGCGCUUUG	UAGGCUACUUGGACCACCUGGAG	0	0	4	0	3 cited not expressed	No	fn-101	mb-01011	ax-1001011	ku-01	ss-111110001100
PID0569	Lin2016-hq	Rhsol	Rhi-milR-107		SRR1994876	6833927	3.36556	23	6	0.26087	UAGGCUACUUGGACCACCUGGAGG	CCCAGUCUGUCACGAGUUGCGCUUUG	UAGGCUACUUGGACCACCUGGAG	0	0	4	0	3 cited not expressed	No	fn-101	mb-01011	ax-1001011	ku-01	ss-111110001100
PID0569	Lin2016-hq	Rhsol	Rhi-milR-107		SRR1994871	8692379	4.14156	36	18	0.5	UAGGCUACUUGGACCACCUGG	AGUCUGUCACGAGUUGCGCUUUG	UAGGCUACUUGGACCACCUGGAG	0	0	3	0	3 cited not expressed	No	fn-101	mb-01011	ax-1001011	ku-01	ss-111110001100
PID0569	Lin2016-hq	Rhsol	Rhi-milR-107		SRR1994875	4270606	2.80991	12	9	0.75	UAGGCUACUUGGACCACCUGGAGGC	GCCCAGUCUGUCACGAGUUGCGCUUUG	UAGGCUACUUGGACCACCUGGAG	0	0	4	0	3 cited not expressed	No	fn-101	mb-01011	ax-1001001	ku-01	ss-101010101110
PID0569	Lin2016-hq	Rhsol	Rhi-milR-107		SRR1994874	9302637	2.57991	24	14	0.583333	UAGGCUACUUGGACCACCUGGAGGC	GCCCAGUCUGUCACGAGUUGCGCUUUG	UAGGCUACUUGGACCACCUGGAG	0	0	6	0	3 cited not expressed	No	fn-101	mb-01011	ax-1001001	ku-01	ss-101010101100
PID0569	Lin2016-hq	Rhsol	Rhi-milR-107		SRR1994873	8626632	2.898	25	8	0.32	UAGGCUACUUGGACCACCUGGAGGC	GCCCAGUCUGUCACGAGUUGCGCUUUG	UAGGCUACUUGGACCACCUGGAG	0	0	6	0	3 cited not expressed	No	fn-101	mb-01011	ax-1001001	ku-01	ss-101010001100
PID0569	Lin2016-hq	Rhsol	Rhi-milR-107		SRR1994877	6052857	7.10408	43	19	0.44186	UAGGCUACUUGGACCACCUGGAGGC	GCCCAGUCUGUCACGAGUUGCGCUUUG	UAGGCUACUUGGACCACCUGGAG	0	0	7	0	3 cited not expressed	No	fn-101	mb-01011	ax-1001001	ku-01	ss-101010001100
PID0570	Lin2016-hq	Rhsol	Rhi-milR-142		SRR1994872	9065193	1.43406	13	12	0.923077	UGGCUGUGAGUAUUCCUUUUGUA	CCAGAGGAAUCUGACGGCGCAACA	UGGCUGUGAGUAUUCCUUUUGU	0	0	7	0	3 cited not expressed	Yes	fn-111	mb-01011	ax-1011011	ku-01	ss-111111101110
PID0570	Lin2016-hq	Rhsol	Rhi-milR-142		SRR1994876	6833927	1.31696	9	8	0.888889	UGGCUGUGAGUAUUCCUUUUGUA	CCAGAGGAAUCUGACGGCGCAACA	UGGCUGUGAGUAUUCCUUUUGU	0	0	3	0	3 cited not expressed	Yes	fn-111	mb-01011	ax-1011011	ku-01	ss-111111101110
PID0570	Lin2016-hq	Rhsol	Rhi-milR-142		SRR1994873	8626632	1.85472	16	13	0.8125	UGGCUGUGAGUAUUCCUUUUGUA	CCAGAGGAAUCUGACGGCGCAACA	UGGCUGUGAGUAUUCCUUUUGU	2	0	5	0	2 cited is not ma	Yes	fn-111	mb-01111	ax-1011011	ku-01	ss-111111101100
PID0570	Lin2016-hq	Rhsol	Rhi-milR-142		SRR1994871	8692379	1.15043	10	9	0.9	UGGCUGUGAGUAUUCCUUUUGUA	CCAGAGGAAUCUGACGGCGCAACA	UGGCUGUGAGUAUUCCUUUUGU	1	0	4	0	2 cited is not ma	Yes	fn-111	mb-01011	ax-1011011	ku-01	ss-101111101110
PID0570	Lin2016-hq	Rhsol	Rhi-milR-142		SRR1994875	4270606	1.40495	6	4	0.666667	UGGCUGUGAGUAUUCCUUUUGUA	CCAGAGGAAUCUGACGGCGCAACA	UGGCUGUGAGUAUUCCUUUUGU	0	0	2	0	3 cited not expressed	No	fn-001	mb-01011	ax-1011011	ku-01	ss-111110101100
PID0570	Lin2016-hq	Rhsol	Rhi-milR-142		SRR1994877	6052857	3.79986	23	16	0.695652	UGGCUGUGAGUAUUCCUUUUGUA	CCAGAGGAAUCUGACGGCGCAACA	UGGCUGUGAGUAUUCCUUUUGU	1	0	6	0	2 cited is not ma	No	fn-101	mb-01011	ax-1011011	ku-01	ss-111110101100
PID0570	Lin2016-hq	Rhsol	Rhi-milR-142		SRR1994874	9302637	2.25742	21	18	0.857143	GGCUGUGAGUAUUCCUUUUGUA	CCAGAGGAAUCUGACGGCGCAAC	UGGCUGUGAGUAUUCCUUUUGU	2	0	4	0	2 cited is not ma	Yes	fn-111	mb-01011	ax-1011011	ku-01	ss-111111111110
PID0571	Lin2016-hq	Rhsol	Rhi-milR-52		SRR1994873	8626632	6.60745	57	57	1	GAGCAUAGACUGGUAGAGCGU	CUCGCUGGAGCUGUCUCU	CGAUGAGCAUAGACUGGUAGAGCG	4	0	5	0	2 cited is not ma	Yes	fn-111	mb-01011	ax-1011011	ku-01	ss-101111111100
PID0571	Lin2016-hq	Rhsol	Rhi-milR-52		SRR1994872	9065193	18.2015	165	165	1	CGAUGAGCAUAGACUGGUAGAGCGUUA	GCCUCGCUGGAGCUGUCUCUCUG	CGAUGAGCAUAGACUGGUAGAGCG	8	0	10	0	2 cited is not ma	Yes	fn-111	mb-01011	ax-1011001	ku-01	ss-101011111000
PID0571	Lin2016-hq	Rhsol	Rhi-milR-52		SRR1994874	9302637	2.68741	25	25	1	UGAGCAUAGACUGGUAGAGCGUUAUAG	CUGGCCUCGCUGGAGCUGUCUCUC	CGAUGAGCAUAGACUGGUAGAGCG	0	0	2	0	3 cited not expressed	Yes	fn-111	mb-01011	ax-1011001	ku-01	ss-101011101100
PID0571	Lin2016-hq	Rhsol	Rhi-milR-52		SRR1994877	6052857	0.660845	4	4	1	UCGAUGAGCAUAGACUGGUAGAGCG	UCGCUGGAGCUGUCUCUCUGU	CGAUGAGCAUAGACUGGUAGAGCG	0	0	2	0	3 cited not expressed	No	fn-011	mb-01011	ax-1011001	ku-01	ss-101011111000
PID0571	Lin2016-hq	Rhsol	Rhi-milR-52		SRR1994871	8692379	0	0	0	NA	CGAUGAGCAUAGACUGGUAGAGCG	UCGCUGGAGCUGUCUCUCUG	CGAUGAGCAUAGACUGGUAGAGCG	0	0	0	0	4 locus not expressed	No	fn-001	mb-01011	ax-1011011	ku-01	ss-000110011100
PID0571	Lin2016-hq	Rhsol	Rhi-milR-52		SRR1994876	6833927	1.31696	9	9	1	AUAGACUGGUAGAGCGUUAUAGAAUA	GUUGCUGGCCUCGCUGGAGCUGUC	CGAUGAGCAUAGACUGGUAGAGCG	0	0	1	0	3 cited not expressed	No	fn-011	mb-01011	ax-1001001	ku-01	ss-100011101100
PID0571	Lin2016-hq	Rhsol	Rhi-milR-52		SRR1994875	4270606	0	0	0	NA	CGAUGAGCAUAGACUGGUAGAGCG	UCGCUGGAGCUGUCUCUCUG	CGAUGAGCAUAGACUGGUAGAGCG	0	0	0	0	4 locus not expressed	No	fn-001	mb-01011	ax-1001011	ku-01	ss-000110001100
PID0572	Lin2016-hq	Rhsol	Rhi-milR-166		SRR1994875	4270606	1.40495	6	6	1	UUGGCAUCAGAAGUUGUAGAAAC	UGAUGCAGCUUGUUAUGUUGGAUUUAACA	UUGGCAUCAGAAGUUGUAGAAA	0	0	4	0	3 cited not expressed	Yes	fn-111	mb-01011	ax-1001011	ku-01	ss-111111101010
PID0572	Lin2016-hq	Rhsol	Rhi-milR-166		SRR1994873	8626632	5.33232	46	45	0.978261	UUGGCAUCAGAAGUUGUAGAAAC	UGAUGCAGCUUGUUAUGUUGGAUUUAACA	UUGGCAUCAGAAGUUGUAGAAA	0	0	10	0	3 cited not expressed	Yes	fn-111	mb-01011	ax-1001011	ku-01	ss-111111101000
PID0572	Lin2016-hq	Rhsol	Rhi-milR-166		SRR1994872	9065193	3.30936	30	29	0.966667	UUGGCAUCAGAAGUUGUAGAAAC	UGAUGCAGCUUGUUAUGUUGGAUUUAACA	UUGGCAUCAGAAGUUGUAGAAA	2	0	6	0	2 cited is not ma	Yes	fn-111	mb-01011	ax-1001011	ku-01	ss-101111101000
PID0572	Lin2016-hq	Rhsol	Rhi-milR-166		SRR1994876	6833927	3.80455	26	26	1	UUGGCAUCAGAAGUUGUAGAAACAG	CAUGAUGCAGCUUGUUAUGUUGGAUUUAACA	UUGGCAUCAGAAGUUGUAGAAA	2	0	7	0	2 cited is not ma	Yes	fn-111	mb-01010	ax-1001001	ku-01	ss-101011101000
PID0572	Lin2016-hq	Rhsol	Rhi-milR-166		SRR1994874	9302637	4.72984	44	42	0.954545	UUGGCAUCAGAAGUUGUAGAAACAG	CAUGAUGCAGCUUGUUAUGUUGGAUUUAACA	UUGGCAUCAGAAGUUGUAGAAA	8	0	9	0	2 cited is not ma	Yes	fn-111	mb-01010	ax-1001001	ku-01	ss-101011101000
PID0572	Lin2016-hq	Rhsol	Rhi-milR-166		SRR1994877	6052857	5.45197	33	33	1	UUGGCAUCAGAAGUUGUAGAAACAG	CAUGAUGCAGCUUGUUAUGUUGGAUUUAACA	UUGGCAUCAGAAGUUGUAGAAA	3	0	5	0	2 cited is not ma	Yes	fn-111	mb-01010	ax-1001001	ku-01	ss-101011101000
PID0572	Lin2016-hq	Rhsol	Rhi-milR-166		SRR1994871	8692379	2.53095	22	19	0.863636	UUGGCAUCAGAAGUUGUAGAAA	GAUGCAGCUUGUUAUGUUGGAUUUAACA	UUGGCAUCAGAAGUUGUAGAAA	3	0	3	0	1 cited is ma	Yes	fn-111	mb-01011	ax-1001011	ku-01	ss-111111101000
PID0574	Lin2016-hq	Rhsol	Rhi-milR-115		SRR1994874	9302637	3.86987	36	32	0.888889	UAUUUGAUAAAGGACUGGGGGGG	CCCCCACCUCAGAUCU	UAUUUGAUAAAGGACUGGGGGG	0	0	3	0	3 cited not expressed	No	fn-011	mb-01011	ax-1011011	ku-01	ss-111111111000
PID0574	Lin2016-hq	Rhsol	Rhi-milR-115		SRR1994877	6052857	4.95634	30	26	0.866667	UAUUUGAUAAAGGACUGGGGGGG	CCCCCACCUCAGAUCU	UAUUUGAUAAAGGACUGGGGGG	0	0	3	0	3 cited not expressed	No	fn-011	mb-01011	ax-1011011	ku-01	ss-111111111000
PID0574	Lin2016-hq	Rhsol	Rhi-milR-115		SRR1994872	9065193	3.75061	34	30	0.882353	UAUUUGAUAAAGGACUGGGGGGG	CCCCCACCUCAGAUCU	UAUUUGAUAAAGGACUGGGGGG	1	0	6	0	2 cited is not ma	Yes	fn-111	mb-01011	ax-1011011	ku-01	ss-111111111000
PID0574	Lin2016-hq	Rhsol	Rhi-milR-115		SRR1994875	4270606	7.02476	30	27	0.9	UAUUUGAUAAAGGACUGGGGGGG	CCCCCACCUCAGAUCU	UAUUUGAUAAAGGACUGGGGGG	1	0	3	0	2 cited is not ma	Yes	fn-111	mb-01011	ax-1011011	ku-01	ss-101111111000
PID0574	Lin2016-hq	Rhsol	Rhi-milR-115		SRR1994876	6833927	8.48707	58	55	0.948276	UAUUUGAUAAAGGACUGGGG	CCACCUCAGAUCU	UAUUUGAUAAAGGACUGGGGGG	4	0	5	0	2 cited is not ma	Yes	fn-111	mb-01011	ax-1011011	ku-01	ss-111111111000
PID0574	Lin2016-hq	Rhsol	Rhi-milR-115		SRR1994873	8626632	3.36168	29	25	0.862069	UAUUUGAUAAAGGACUGGGGGG	CCCCACCUCAGAUCU	UAUUUGAUAAAGGACUGGGGGG	1	0	1	0	1 cited is ma	No	fn-011	mb-01011	ax-1011011	ku-01	ss-100111111000
PID0574	Lin2016-hq	Rhsol	Rhi-milR-115		SRR1994871	8692379	5.52208	48	36	0.75	UAUUUGAUAAAGGACUGGG	CACCUCAGAUCU	UAUUUGAUAAAGGACUGGGGGG	0	0	2	0	3 cited not expressed	No	fn-001	mb-01011	ax-1011001	ku-01	ss-101010111000
PID0575	Lin2016-hq	Rhsol	Rhi-milR-22		SRR1994874	9302637	12.4696	116	16	0.137931	AGCGAGUUGCAGUUCCUGGAUG	UCCAGGUACAAGCUGUAUCUCCUAU	AGCGAGUUGCAGUUCCUGGAUGC	0	0	4	0	3 cited not expressed	No	fn-101	mb-01011	ax-1011011	ku-01	ss-101111001100
PID0575	Lin2016-hq	Rhsol	Rhi-milR-22		SRR1994877	6052857	8.59098	52	4	0.0769231	AGCGAGUUGCAGUUCCUGGAUG	UCCAGGUACAAGCUGUAUCUCCUAU	AGCGAGUUGCAGUUCCUGGAUGC	0	0	2	0	3 cited not expressed	No	fn-001	mb-01011	ax-1011011	ku-01	ss-101111001100
PID0575	Lin2016-hq	Rhsol	Rhi-milR-22		SRR1994875	4270606	14.9862	64	4	0.0625	UAGCGAGUUGCAGUUCCUGGAU	CCAGGUACAAGCUGUAUCUCCUAUA	AGCGAGUUGCAGUUCCUGGAUGC	0	0	1	0	3 cited not expressed	No	fn-001	mb-01011	ax-1011011	ku-01	ss-100111001100
PID0575	Lin2016-hq	Rhsol	Rhi-milR-22		SRR1994872	9065193	114.835	1041	67	0.0643612	AGCGAGUUGCAGUUCCUGGAUGCUUAU	AAGCUUCCAGGUACAAGCUGUAUCUCCUAU	AGCGAGUUGCAGUUCCUGGAUGC	0	0	16	0	3 cited not expressed	No	fn-101	mb-01011	ax-1001001	ku-01	ss-101011001100
PID0575	Lin2016-hq	Rhsol	Rhi-milR-22		SRR1994876	6833927	94.0894	643	14	0.0217729	AGCGAGUUGCAGUUCCUGGAUGCUUAU	AAGCUUCCAGGUACAAGCUGUAUCUCCUAU	AGCGAGUUGCAGUUCCUGGAUGC	0	0	6	0	3 cited not expressed	No	fn-101	mb-01011	ax-1001001	ku-01	ss-101011001100
PID0575	Lin2016-hq	Rhsol	Rhi-milR-22		SRR1994873	8626632	58.7715	507	43	0.0848126	AGCGAGUUGCAGUUCCUGGAUGCUUAU	AAGCUUCCAGGUACAAGCUGUAUCUCCUAU	AGCGAGUUGCAGUUCCUGGAUGC	2	0	10	0	2 cited is not ma	No	fn-101	mb-01011	ax-1001001	ku-01	ss-101011001100
PID0575	Lin2016-hq	Rhsol	Rhi-milR-22		SRR1994871	8692379	12.0795	105	7	0.0666667	AGCGAGUUGCAGUUCCUGGAUGCUUAU	AAGCUUCCAGGUACAAGCUGUAUCUCCUAU	AGCGAGUUGCAGUUCCUGGAUGC	0	0	3	0	3 cited not expressed	No	fn-101	mb-01011	ax-1001001	ku-01	ss-101011001100
PID0576	Lin2016-hq	Rhsol	Rhi-milR-93		SRR1994872	9065193	6.72903	61	58	0.95082	GUUCCAAGUUAAUUCCCAACG	UUGAUGAAUUAACUUUGGAACAC	GUUCCAAGUUAAUUCCCAAC	1	0	51	0	2 cited is not ma	Yes	fn-111	mb-01011	ax-1011111	ku-01	ss-111111111110
PID0576	Lin2016-hq	Rhsol	Rhi-milR-93		SRR1994875	4270606	0.234159	1	1	1	GUUCCAAGUUAAUUCCCAACG	UUGAUGAAUUAACUUUGGAACAC	GUUCCAAGUUAAUUCCCAAC	0	0	1	0	3 cited not expressed	No	fn-011	mb-01011	ax-1011111	ku-01	ss-110111111110
PID0576	Lin2016-hq	Rhsol	Rhi-milR-93		SRR1994873	8626632	2.78208	24	22	0.916667	GUUCCAAGUUAAUUCCCAACG	UUGAUGAAUUAACUUUGGAACAC	GUUCCAAGUUAAUUCCCAAC	0	0	15	0	3 cited not expressed	Yes	fn-111	mb-01011	ax-1011011	ku-01	ss-111111111110
PID0576	Lin2016-hq	Rhsol	Rhi-milR-93		SRR1994871	8692379	0.805303	7	5	0.714286	GUUCCAAGUUAAUUCCCAACG	UUGAUGAAUUAACUUUGGAACAC	GUUCCAAGUUAAUUCCCAAC	0	0	4	0	3 cited not expressed	No	fn-001	mb-01011	ax-1011011	ku-01	ss-111110111110
PID0576	Lin2016-hq	Rhsol	Rhi-milR-93		SRR1994874	9302637	0.859971	8	5	0.625	GUUCCAAGUUAAUUCCCAACG	UUGAUGAAUUAACUUUGGAACAC	GUUCCAAGUUAAUUCCCAAC	0	0	4	0	3 cited not expressed	No	fn-001	mb-01011	ax-1011011	ku-01	ss-111110111100
PID0576	Lin2016-hq	Rhsol	Rhi-milR-93		SRR1994876	6833927	0.585315	4	0	0	GUUCCAAGUUAAUUCCCAAC	UGAUGAAUUAACUUUGGAACAC	GUUCCAAGUUAAUUCCCAAC	0	0	0	0	3 cited not expressed	No	fn-001	mb-01011	ax-1011011	ku-01	ss-110111011100
PID0576	Lin2016-hq	Rhsol	Rhi-milR-93		SRR1994877	6052857	0.660845	4	1	0.25	GUUGAUGAAUUAACUUUGGAACA	UUCCAAGUUAAUUCCCAACGU	GUUCCAAGUUAAUUCCCAAC	0	0	1	0	3 cited not expressed	No	fn-001	mb-01011	ax-1011011	ku-01	ss-110110011100
PID0577	Lin2016-hq	Rhsol	Rhi-milR-148		SRR1994872	9065193	2.86811	26	22	0.846154	UGGGCUGUAAGUCCUCAAGGGG	CCUUGAGACAAGUUCCGU	UGGGCUGUAAGUCCUCAAGGG	0	0	4	0	3 cited not expressed	Yes	fn-111	mb-01111	ax-1011011	ku-01	ss-111111111000
PID0577	Lin2016-hq	Rhsol	Rhi-milR-148		SRR1994871	8692379	1.84069	16	14	0.875	UGGGCUGUAAGUCCUCAAGGGG	CCUUGAGACAAGUUCCGU	UGGGCUGUAAGUCCUCAAGGG	1	0	5	0	2 cited is not ma	Yes	fn-111	mb-01111	ax-1011011	ku-01	ss-101111111010
PID0577	Lin2016-hq	Rhsol	Rhi-milR-148		SRR1994874	9302637	2.68741	25	23	0.92	UGGGCUGUAAGUCCUCAAGGGG	CCUUGAGACAAGUUCCGU	UGGGCUGUAAGUCCUCAAGGG	0	0	7	0	3 cited not expressed	Yes	fn-111	mb-01111	ax-1011011	ku-01	ss-111111111000
PID0577	Lin2016-hq	Rhsol	Rhi-milR-148		SRR1994873	8626632	3.36168	29	27	0.931034	UGGGCUGUAAGUCCUCAAGGGG	CCUUGAGACAAGUUCCGU	UGGGCUGUAAGUCCUCAAGGG	0	0	4	0	3 cited not expressed	Yes	fn-111	mb-01111	ax-1011011	ku-01	ss-101111111000
PID0577	Lin2016-hq	Rhsol	Rhi-milR-148		SRR1994877	6052857	1.98253	12	11	0.916667	UGGGCUGUAAGUCCUCAAGGGG	CCUUGAGACAAGUUCCGU	UGGGCUGUAAGUCCUCAAGGG	0	0	3	0	3 cited not expressed	Yes	fn-111	mb-01011	ax-1011011	ku-01	ss-111111111000
PID0577	Lin2016-hq	Rhsol	Rhi-milR-148		SRR1994876	6833927	1.46329	10	10	1	UGGGCUGUAAGUCCUCAAGGGG	CCUUGAGACAAGUUCCGU	UGGGCUGUAAGUCCUCAAGGG	0	0	5	0	3 cited not expressed	Yes	fn-111	mb-01011	ax-1011011	ku-01	ss-101111111000
PID0577	Lin2016-hq	Rhsol	Rhi-milR-148		SRR1994875	4270606	0.702476	3	2	0.666667	UGGGCUGUAAGUCCUCAAGGGGG	CCCUUGAGACAAGUUCCGU	UGGGCUGUAAGUCCUCAAGGG	0	0	1	0	3 cited not expressed	No	fn-001	mb-01011	ax-1011011	ku-01	ss-110110101000
PID0578	Lin2016-hq	Rhsol	Rhi-milR-2		SRR1994875	4270606	4.91733	21	21	1	AAAGCUGUUAACCCGCGGAGAGG	CUUCAUGGGUUUAACUGCGCUUUUU	AAAGCUGUUAACCCGCGGAGAG	0	0	3	0	3 cited not expressed	Yes	fn-111	mb-01011	ax-1011011	ku-01	ss-101111111100
PID0578	Lin2016-hq	Rhsol	Rhi-milR-2		SRR1994871	8692379	8.97338	78	76	0.974359	AAAAGCUGUUAACCCGCGGAGAGG	CUUCAUGGGUUUAACUGCGCUUUUUU	AAAGCUGUUAACCCGCGGAGAG	1	0	7	0	2 cited is not ma	Yes	fn-111	mb-01011	ax-1011011	ku-01	ss-101111111100
PID0578	Lin2016-hq	Rhsol	Rhi-milR-2		SRR1994874	9302637	11.8246	110	108	0.981818	AAAAGCUGUUAACCCGCGGAGAGG	CUUCAUGGGUUUAACUGCGCUUUUUU	AAAGCUGUUAACCCGCGGAGAG	0	0	11	0	3 cited not expressed	Yes	fn-111	mb-01011	ax-1011011	ku-01	ss-101111111100
PID0578	Lin2016-hq	Rhsol	Rhi-milR-2		SRR1994877	6052857	3.13901	19	19	1	AAAGCUGUUAACCCGCGGAGAGG	CUUCAUGGGUUUAACUGCGCUUUUU	AAAGCUGUUAACCCGCGGAGAG	0	0	3	0	3 cited not expressed	Yes	fn-111	mb-01011	ax-1011011	ku-01	ss-101111111100
PID0578	Lin2016-hq	Rhsol	Rhi-milR-2		SRR1994872	9065193	10.259	93	90	0.967742	GGGUGAAAAAGCUGUUAACCCGCGGAGAG	UUCAUGGGUUUAACUGCGCUUUUUUGUUCCUC	AAAGCUGUUAACCCGCGGAGAG	0	0	5	0	3 cited not expressed	Yes	fn-111	mb-01011	ax-1001001	ku-01	ss-101011101100
PID0578	Lin2016-hq	Rhsol	Rhi-milR-2		SRR1994873	8626632	11.2442	97	93	0.958763	GGGUGAAAAAGCUGUUAACCCGCGGAGAGG	CUUCAUGGGUUUAACUGCGCUUUUUUGUUCCUC	AAAGCUGUUAACCCGCGGAGAG	0	0	5	0	3 cited not expressed	Yes	fn-111	mb-01011	ax-1001001	ku-01	ss-101011101100
PID0578	Lin2016-hq	Rhsol	Rhi-milR-2		SRR1994876	6833927	6.58479	45	41	0.911111	GUGAAAAAGCUGUUAACCCGCGGAGAGGC	CCUUCAUGGGUUUAACUGCGCUUUUUUGUUCC	AAAGCUGUUAACCCGCGGAGAG	0	0	3	0	3 cited not expressed	No	fn-011	mb-01011	ax-1001001	ku-01	ss-101011101100
PID0579	Lin2016-hq	Rhsol	Rhi-milR-146		SRR1994876	6833927	3.65822	25	24	0.96	UGGGCAUGUGAUCAAUAUAGCGGC	CCUAUUGAAAGACAUCAUGCCUUCA	UGGGCAUGUGAUCAAUAUAGCGGCU	0	0	15	0	3 cited not expressed	Yes	fn-111	mb-01011	ax-1001011	ku-01	ss-111111101110
PID0579	Lin2016-hq	Rhsol	Rhi-milR-146		SRR1994873	8626632	9.38953	81	80	0.987654	UGGGCAUGUGAUCAAUAUAGCGGC	CCUAUUGAAAGACAUCAUGCCUUCA	UGGGCAUGUGAUCAAUAUAGCGGCU	2	0	39	0	2 cited is not ma	Yes	fn-111	mb-01111	ax-1001011	ku-01	ss-101111101110
PID0579	Lin2016-hq	Rhsol	Rhi-milR-146		SRR1994874	9302637	4.94483	46	45	0.978261	UGGGCAUGUGAUCAAUAUAGCGGC	CCUAUUGAAAGACAUCAUGCCUUCA	UGGGCAUGUGAUCAAUAUAGCGGCU	2	0	20	0	2 cited is not ma	Yes	fn-111	mb-01111	ax-1001011	ku-01	ss-101111101110
PID0579	Lin2016-hq	Rhsol	Rhi-milR-146		SRR1994877	6052857	6.44324	39	38	0.974359	UGGGCAUGUGAUCAAUAUAGCGGC	CCUAUUGAAAGACAUCAUGCCUUCA	UGGGCAUGUGAUCAAUAUAGCGGCU	1	0	14	0	2 cited is not ma	Yes	fn-111	mb-01011	ax-1001011	ku-01	ss-111111101110
PID0579	Lin2016-hq	Rhsol	Rhi-milR-146		SRR1994871	8692379	4.37165	38	36	0.947368	UGGGCAUGUGAUCAAUAUAGCGGC	CCUAUUGAAAGACAUCAUGCCUUCA	UGGGCAUGUGAUCAAUAUAGCGGCU	2	0	8	0	2 cited is not ma	Yes	fn-111	mb-01111	ax-1001011	ku-01	ss-101111101100
PID0579	Lin2016-hq	Rhsol	Rhi-milR-146		SRR1994872	9065193	12.3549	112	107	0.955357	UGGGCAUGUGAUCAAUAUAGCGGC	CCUAUUGAAAGACAUCAUGCCUUCA	UGGGCAUGUGAUCAAUAUAGCGGCU	7	0	34	0	2 cited is not ma	Yes	fn-111	mb-01011	ax-1001011	ku-01	ss-101111101100
PID0579	Lin2016-hq	Rhsol	Rhi-milR-146		SRR1994875	4270606	2.57575	11	11	1	AUAAUGGGCAUGUGAUCAAUA	GAAAGACAUCAUGCCUUCAA	UGGGCAUGUGAUCAAUAUAGCGGCU	0	0	2	0	3 cited not expressed	No	fn-011	mb-01011	ax-1001011	ku-01	ss-111111101100
PID0580	Lin2016-hq	Rhsol	Rhi-milR-164		SRR1994876	6833927	1.75595	12	12	1	UUGGAUAUGUGGUACAAGCGAGG	UUGUUUUAAUGUCUCGGUAUCCAAAA	UUGGAUAUGUGGUACAAGCGAG	0	0	6	0	3 cited not expressed	Yes	fn-111	mb-01011	ax-1001011	ku-01	ss-101111101110
PID0580	Lin2016-hq	Rhsol	Rhi-milR-164		SRR1994872	9065193	5.18467	47	47	1	UUGGAUAUGUGGUACAAGCGAGG	UUGUUUUAAUGUCUCGGUAUCCAAAA	UUGGAUAUGUGGUACAAGCGAG	0	0	5	0	3 cited not expressed	Yes	fn-111	mb-01011	ax-1001011	ku-01	ss-101111101100
PID0580	Lin2016-hq	Rhsol	Rhi-milR-164		SRR1994873	8626632	3.82536	33	32	0.969697	UUGGAUAUGUGGUACAAGCGAGG	UUGUUUUAAUGUCUCGGUAUCCAAAA	UUGGAUAUGUGGUACAAGCGAG	0	0	10	0	3 cited not expressed	Yes	fn-111	mb-01011	ax-1001011	ku-01	ss-101111101100
PID0580	Lin2016-hq	Rhsol	Rhi-milR-164		SRR1994871	8692379	3.56634	31	30	0.967742	UUGGAUAUGUGGUACAAGCGAGG	UUGUUUUAAUGUCUCGGUAUCCAAAA	UUGGAUAUGUGGUACAAGCGAG	0	0	9	0	3 cited not expressed	Yes	fn-111	mb-01011	ax-1001011	ku-01	ss-101111101100
PID0580	Lin2016-hq	Rhsol	Rhi-milR-164		SRR1994877	6052857	2.64338	16	16	1	UUGGAUAUGUGGUACAAGCGAGG	UUGUUUUAAUGUCUCGGUAUCCAAAA	UUGGAUAUGUGGUACAAGCGAG	0	0	5	0	3 cited not expressed	Yes	fn-111	mb-01011	ax-1001011	ku-01	ss-101111101100
PID0580	Lin2016-hq	Rhsol	Rhi-milR-164		SRR1994874	9302637	1.71994	16	16	1	UCAACUGUUGGAUAUGUGGUA	UCGGUAUCCAAAAGGAUUAA	UUGGAUAUGUGGUACAAGCGAG	0	0	2	0	3 cited not expressed	No	fn-011	mb-01110	ax-1001011	ku-01	ss-111111101100
PID0580	Lin2016-hq	Rhsol	Rhi-milR-164		SRR1994875	4270606	1.17079	5	5	1	UUAAUGUCUCGGUAUCCAAAAGG	UGUUGGAUAUGUGGUACAAG	UUGGAUAUGUGGUACAAGCGAG	0	0	1	0	3 cited not expressed	No	fn-011	mb-00011	ax-1001011	ku-01	ss-100111101100
PID0581	Lin2016-hq	Rhsol	Rhi-milR-21		SRR1994876	6833927	4.68252	32	30	0.9375	UAGCGAGGUAGAACAAGUAAGUCCA	CUCUUGCAUUUGCCUUGGAAAA	AGCGAGGUAGAACAAGUAAGUCC	0	0	3	0	3 cited not expressed	Yes	fn-111	mb-01010	ax-1001001	ku-01	ss-111011101000
PID0581	Lin2016-hq	Rhsol	Rhi-milR-21		SRR1994877	6052857	6.27803	38	36	0.947368	UAGCGAGGUAGAACAAGUAAGUCCA	CUCUUGCAUUUGCCUUGGAAAA	AGCGAGGUAGAACAAGUAAGUCC	1	0	5	0	2 cited is not ma	Yes	fn-111	mb-01010	ax-1001001	ku-01	ss-111011101000
PID0581	Lin2016-hq	Rhsol	Rhi-milR-21		SRR1994875	4270606	2.80991	12	9	0.75	UAGCGAGGUAGAACAAGUAAGUCCA	CUCUUGCAUUUGCCUUGGAAAA	AGCGAGGUAGAACAAGUAAGUCC	0	0	2	0	3 cited not expressed	No	fn-001	mb-01110	ax-1001001	ku-01	ss-101010101000
PID0581	Lin2016-hq	Rhsol	Rhi-milR-21		SRR1994874	9302637	7.52475	70	61	0.871429	UAGCGAGGUAGAACAAGUAAGUCCA	CUCUUGCAUUUGCCUUGGAAAA	AGCGAGGUAGAACAAGUAAGUCC	0	0	9	0	3 cited not expressed	Yes	fn-111	mb-01010	ax-1001001	ku-01	ss-101011101000
PID0581	Lin2016-hq	Rhsol	Rhi-milR-21		SRR1994872	9065193	11.8034	107	68	0.635514	UAGCGAGGUAGAACAAGUAAGUCCA	CUCUUGCAUUUGCCUUGGAAAA	AGCGAGGUAGAACAAGUAAGUCC	2	0	11	0	2 cited is not ma	No	fn-101	mb-01010	ax-1001001	ku-01	ss-101010101000
PID0581	Lin2016-hq	Rhsol	Rhi-milR-21		SRR1994873	8626632	11.2442	97	75	0.773196	UAGCGAGGUAGAACAAGUAAGUCCA	CUCUUGCAUUUGCCUUGGAAAA	AGCGAGGUAGAACAAGUAAGUCC	1	0	16	0	2 cited is not ma	No	fn-101	mb-01010	ax-1001001	ku-01	ss-101010101000
PID0581	Lin2016-hq	Rhsol	Rhi-milR-21		SRR1994871	8692379	5.75217	50	45	0.9	UAGCGAGGUAGAACAAGUAAGUC	CUUGCAUUUGCCUUGGAAAA	AGCGAGGUAGAACAAGUAAGUCC	0	0	5	0	3 cited not expressed	Yes	fn-111	mb-01011	ax-1001011	ku-01	ss-101111101100
PID0582	Lin2016-hq	Rhsol	Rhi-milR-130		SRR1994871	8692379	1.49556	13	13	1	UGAGUGCCAGUGCAAGCAGC	UGCUAGCCCUGUCACUCCCA	UGAGUGCCAGUGCAAGCAGC	5	0	5	0	1 cited is ma	Yes	fn-111	mb-01011	ax-1011011	ku-01	ss-111111101110
PID0582	Lin2016-hq	Rhsol	Rhi-milR-130		SRR1994876	6833927	0.585315	4	4	1	UGAGUGCCAGUGCAAGCAGC	UGCUAGCCCUGUCACUCCCA	UGAGUGCCAGUGCAAGCAGC	2	0	2	0	1 cited is ma	No	fn-011	mb-01011	ax-1011011	ku-01	ss-111111101100
PID0582	Lin2016-hq	Rhsol	Rhi-milR-130		SRR1994875	4270606	1.17079	5	5	1	UGAGUGCCAGUGCAAGCAGC	UGCUAGCCCUGUCACUCCCA	UGAGUGCCAGUGCAAGCAGC	1	0	1	0	1 cited is ma	Yes	fn-111	mb-01011	ax-1011111	ku-01	ss-100111101110
PID0582	Lin2016-hq	Rhsol	Rhi-milR-130		SRR1994873	8626632	1.85472	16	15	0.9375	UGAGUGCCAGUGCAAGCAGC	UGCUAGCCCUGUCACUCCCA	UGAGUGCCAGUGCAAGCAGC	3	0	3	0	1 cited is ma	Yes	fn-111	mb-01011	ax-1011011	ku-01	ss-101111101110
PID0582	Lin2016-hq	Rhsol	Rhi-milR-130		SRR1994877	6052857	0	0	0	NA	UGAGUGCCAGUGCAAGCAGC	UGCUAGCCCUGUCACUCCCA	UGAGUGCCAGUGCAAGCAGC	0	0	0	0	4 locus not expressed	No	fn-001	mb-01011	ax-1001011	ku-01	ss-000110001100
PID0582	Lin2016-hq	Rhsol	Rhi-milR-130		SRR1994872	9065193	4.41248	40	40	1	GAGUGCCAGUGCAAGCAGCG	CUGCUAGCCCUGUCACUCCC	UGAGUGCCAGUGCAAGCAGC	2	0	8	4	2 cited is not ma	Yes	fn-111	mb-01011	ax-1111111	ku-01	ss-101111101111
PID0582	Lin2016-hq	Rhsol	Rhi-milR-130		SRR1994874	9302637	0.429986	4	4	1	UGAGUGCCAGUGCAAGCAGCG	CUGCUAGCCCUGUCACUCCCA	UGAGUGCCAGUGCAAGCAGC	1	0	2	0	2 cited is not ma	No	fn-011	mb-01011	ax-1001111	ku-01	ss-111111101110
PID0583	Lin2016-hq	Rhsol	Rhi-milR-103		SRR1994871	8692379	2.41591	21	20	0.952381	UUAGAACCAGAUUGAUGAUGCG	GCUGGCUCAAUUUGGUUGUAUGC	UAGAACCAGAUUGAUGAUGCGCC	0	0	3	0	3 cited not expressed	Yes	fn-111	mb-01011	ax-1001011	ku-01	ss-111111101100
PID0583	Lin2016-hq	Rhsol	Rhi-milR-103		SRR1994872	9065193	2.86811	26	18	0.692308	UUAGAACCAGAUUGAUGAUGCGC	AGCUGGCUCAAUUUGGUUGUAUGC	UAGAACCAGAUUGAUGAUGCGCC	3	0	4	0	2 cited is not ma	No	fn-101	mb-01011	ax-1001011	ku-01	ss-111110101100
PID0583	Lin2016-hq	Rhsol	Rhi-milR-103		SRR1994873	8626632	2.66616	23	16	0.695652	UUAGAACCAGAUUGAUGAUGCGC	AGCUGGCUCAAUUUGGUUGUAUGC	UAGAACCAGAUUGAUGAUGCGCC	0	0	5	0	3 cited not expressed	No	fn-101	mb-01011	ax-1001011	ku-01	ss-111110101100
PID0583	Lin2016-hq	Rhsol	Rhi-milR-103		SRR1994874	9302637	2.68741	25	16	0.64	UAGAACCAGAUUGAUGAUGCGCC	CAGCUGGCUCAAUUUGGUUGUAUG	UAGAACCAGAUUGAUGAUGCGCC	3	0	3	0	1 cited is ma	No	fn-101	mb-01011	ax-1001011	ku-01	ss-111110101100
PID0583	Lin2016-hq	Rhsol	Rhi-milR-103		SRR1994876	6833927	3.65822	25	17	0.68	UUAGAACCAGAUUGAUGAUGCGC	AGCUGGCUCAAUUUGGUUGUAUGC	UAGAACCAGAUUGAUGAUGCGCC	0	0	4	0	3 cited not expressed	No	fn-101	mb-01011	ax-1001011	ku-01	ss-101110101100
PID0583	Lin2016-hq	Rhsol	Rhi-milR-103		SRR1994877	6052857	3.13901	19	9	0.473684	UUAGAACCAGAUUGAUGAUGCGC	AGCUGGCUCAAUUUGGUUGUAUGC	UAGAACCAGAUUGAUGAUGCGCC	0	0	3	0	3 cited not expressed	No	fn-101	mb-01011	ax-1001011	ku-01	ss-111110001100
PID0583	Lin2016-hq	Rhsol	Rhi-milR-103		SRR1994875	4270606	0.936635	4	3	0.75	UCUGGCAGCUGGCUCAAUUUGG	CAGCUGGCUCAAUUUGGUUGUAUG	UAGAACCAGAUUGAUGAUGCGCC	0	0	1	0	3 cited not expressed	No	fn-001	mb-00011	ax-1001011	ku-01	ss-100110101100
PID0584	Lin2016-hq	Rhsol	Rhi-milR-37		SRR1994873	8626632	2.66616	23	23	1	AUGGGAUGGCUUACUGGGGA	CACCAACUAGGGCUAUCUCCAACC	AUGGGAUGGCUUACUGGGGA	3	0	3	0	1 cited is ma	Yes	fn-111	mb-01011	ax-1001011	ku-01	ss-101111101000
PID0584	Lin2016-hq	Rhsol	Rhi-milR-37		SRR1994874	9302637	2.68741	25	25	1	UAUGGGAUGGCUUACUGGGGAA	CCACCAACUAGGGCUAUCUCCAACCA	AUGGGAUGGCUUACUGGGGA	1	0	5	0	2 cited is not ma	Yes	fn-111	mb-01011	ax-1001011	ku-01	ss-101111101000
PID0584	Lin2016-hq	Rhsol	Rhi-milR-37		SRR1994872	9065193	2.64749	24	24	1	AUGGGAUGGCUUACUGGG	CCAACUAGGGCUAUCUCCAACC	AUGGGAUGGCUUACUGGGGA	0	0	4	0	3 cited not expressed	Yes	fn-111	mb-01111	ax-1001001	ku-01	ss-101011101000
PID0584	Lin2016-hq	Rhsol	Rhi-milR-37		SRR1994877	6052857	0	0	0	NA	AUGGGAUGGCUUACUGGGGA	CACCAACUAGGGCUAUCUCCAACC	AUGGGAUGGCUUACUGGGGA	0	0	0	0	4 locus not expressed	No	fn-001	mb-01011	ax-1001011	ku-01	ss-000110001000
PID0584	Lin2016-hq	Rhsol	Rhi-milR-37		SRR1994871	8692379	0.575217	5	5	1	AUGGGAUGGCUUACUGGGGAA	CCACCAACUAGGGCUAUCUCCAACC	AUGGGAUGGCUUACUGGGGA	0	0	3	0	3 cited not expressed	No	fn-011	mb-01011	ax-1001111	ku-01	ss-101111101010
PID0584	Lin2016-hq	Rhsol	Rhi-milR-37		SRR1994876	6833927	0.585315	4	4	1	AACUAGGGCUAUCUCCAAC	UGGGAUGGCUUACUGG	AUGGGAUGGCUUACUGGGGA	0	0	2	0	3 cited not expressed	No	fn-011	mb-01011	ax-1001001	ku-01	ss-101011101100
PID0584	Lin2016-hq	Rhsol	Rhi-milR-37		SRR1994875	4270606	0.468318	2	2	1	AAUAUGGGAUGGCUUACUGG	AACUAGGGCUAUCUCCAACCAAA	AUGGGAUGGCUUACUGGGGA	0	0	1	0	3 cited not expressed	No	fn-011	mb-01010	ax-1001011	ku-01	ss-100111101100
PID0585	Lin2016-hq	Rhsol	Rhi-milR-56		SRR1994876	6833927	1.46329	10	10	1	CGGCUUCAAGAACGGUACCGACGG	GUCGGCGUCGCUGUUGAUGCCAUG	CGGCUUCAAGAACGGUACCGACG	0	0	6	0	3 cited not expressed	Yes	fn-111	mb-01011	ax-1001111	ku-01	ss-101111101110
PID0585	Lin2016-hq	Rhsol	Rhi-milR-56		SRR1994877	6052857	2.80859	17	17	1	CGGCUUCAAGAACGGUACCGACGG	GUCGGCGUCGCUGUUGAUGCCAUG	CGGCUUCAAGAACGGUACCGACG	0	0	8	0	3 cited not expressed	Yes	fn-111	mb-01011	ax-1001111	ku-01	ss-101111101110
PID0585	Lin2016-hq	Rhsol	Rhi-milR-56		SRR1994871	8692379	0.460173	4	4	1	CGGCUUCAAGAACGGUACCGACGG	GUCGGCGUCGCUGUUGAUGCCAUG	CGGCUUCAAGAACGGUACCGACG	0	0	1	0	3 cited not expressed	No	fn-011	mb-01011	ax-1001111	ku-01	ss-100111101110
PID0585	Lin2016-hq	Rhsol	Rhi-milR-56		SRR1994874	9302637	1.50495	14	14	1	CGGCUUCAAGAACGGUACCGACGG	GUCGGCGUCGCUGUUGAUGCCAUG	CGGCUUCAAGAACGGUACCGACG	0	0	4	0	3 cited not expressed	Yes	fn-111	mb-01011	ax-1001011	ku-01	ss-101111101100
PID0585	Lin2016-hq	Rhsol	Rhi-milR-56		SRR1994872	9065193	7.61153	69	69	1	CGGCUUCAAGAACGGUACCGACGGC	CGUCGGCGUCGCUGUUGAUGCCAUG	CGGCUUCAAGAACGGUACCGACG	0	0	23	0	3 cited not expressed	Yes	fn-111	mb-01011	ax-1001101	ku-01	ss-101011101110
PID0585	Lin2016-hq	Rhsol	Rhi-milR-56		SRR1994873	8626632	4.40496	38	38	1	CGGCUUCAAGAACGGUACCGACGGC	CGUCGGCGUCGCUGUUGAUGCCAUG	CGGCUUCAAGAACGGUACCGACG	0	0	11	0	3 cited not expressed	Yes	fn-111	mb-01011	ax-1001001	ku-01	ss-101011101110
PID0585	Lin2016-hq	Rhsol	Rhi-milR-56		SRR1994875	4270606	1.40495	6	6	1	CGUUCCCGGUCGGCUUCAA	UCGGCGUCGCUGUUGAUGCCAUG	CGGCUUCAAGAACGGUACCGACG	0	0	1	0	3 cited not expressed	No	fn-011	mb-00011	ax-1001001	ku-01	ss-100011101100
PID0586	Lin2016-hq	Rhsol	Rhi-milR-149		SRR1994872	9065193	3.75061	34	31	0.911765	UGGUCGGCACAUGUUGUAGGAGC	ACCUACUGCACCAGCUAUA	UGGUCGGCACAUGUUGUAGGAG	0	0	12	0	3 cited not expressed	Yes	fn-111	mb-01111	ax-1001011	ku-01	ss-111111101000
PID0586	Lin2016-hq	Rhsol	Rhi-milR-149		SRR1994871	8692379	5.86721	51	45	0.882353	UGGUCGGCACAUGUUGUAGGAGC	ACCUACUGCACCAGCUAUA	UGGUCGGCACAUGUUGUAGGAG	0	0	6	0	3 cited not expressed	Yes	fn-111	mb-01111	ax-1001011	ku-01	ss-111111101000
PID0586	Lin2016-hq	Rhsol	Rhi-milR-149		SRR1994876	6833927	3.65822	25	23	0.92	UGGUCGGCACAUGUUGUAGGAGC	ACCUACUGCACCAGCUAUA	UGGUCGGCACAUGUUGUAGGAG	0	0	5	0	3 cited not expressed	Yes	fn-111	mb-01011	ax-1001011	ku-01	ss-111111101000
PID0586	Lin2016-hq	Rhsol	Rhi-milR-149		SRR1994875	4270606	2.10743	9	9	1	UGGUCGGCACAUGUUGUAGGAGC	ACCUACUGCACCAGCUAUA	UGGUCGGCACAUGUUGUAGGAG	0	0	4	0	3 cited not expressed	Yes	fn-111	mb-01011	ax-1001011	ku-01	ss-111111101000
PID0586	Lin2016-hq	Rhsol	Rhi-milR-149		SRR1994874	9302637	4.08486	38	32	0.842105	UGGUCGGCACAUGUUGUAGGAGC	ACCUACUGCACCAGCUAUA	UGGUCGGCACAUGUUGUAGGAG	2	0	11	0	2 cited is not ma	Yes	fn-111	mb-01011	ax-1001011	ku-01	ss-111111101000
PID0586	Lin2016-hq	Rhsol	Rhi-milR-149		SRR1994877	6052857	5.45197	33	29	0.878788	UGGUCGGCACAUGUUGUAGGAGC	ACCUACUGCACCAGCUAUA	UGGUCGGCACAUGUUGUAGGAG	2	0	12	0	2 cited is not ma	Yes	fn-111	mb-01011	ax-1001011	ku-01	ss-111111101000
PID0586	Lin2016-hq	Rhsol	Rhi-milR-149		SRR1994873	8626632	3.24576	28	22	0.785714	UGGUCGGCACAUGUUGUAGGAGC	ACCUACUGCACCAGCUAUA	UGGUCGGCACAUGUUGUAGGAG	2	0	8	0	2 cited is not ma	No	fn-101	mb-01011	ax-1001011	ku-01	ss-111110101000
PID0587	Lin2016-hq	Rhsol	Rhi-milR-128		SRR1994872	9065193	3.6403	33	29	0.878788	UGAGGAGAAGUGUGGAUCAAUGC	GUUUGUACAGUGCCCUCAGG	UGAGGAGAAGUGUGGAUCAAUG	4	0	8	0	2 cited is not ma	Yes	fn-111	mb-01011	ax-1011011	ku-01	ss-111111101100
PID0587	Lin2016-hq	Rhsol	Rhi-milR-128		SRR1994876	6833927	9.6577	66	65	0.984848	UGAGGAGAAGUGUGGAUCAAUGC	GUUUGUACAGUGCCCUCAGG	UGAGGAGAAGUGUGGAUCAAUG	3	0	15	0	2 cited is not ma	Yes	fn-111	mb-01011	ax-1011011	ku-01	ss-111111101100
PID0587	Lin2016-hq	Rhsol	Rhi-milR-128		SRR1994875	4270606	9.36635	40	34	0.85	UGAGGAGAAGUGUGGAUCAAUGC	GUUUGUACAGUGCCCUCAGG	UGAGGAGAAGUGUGGAUCAAUG	3	0	10	0	2 cited is not ma	Yes	fn-111	mb-01011	ax-1011011	ku-01	ss-111111101100
PID0587	Lin2016-hq	Rhsol	Rhi-milR-128		SRR1994873	8626632	13.5627	117	105	0.897436	UGAGGAGAAGUGUGGAUCAAUGC	GUUUGUACAGUGCCCUCAGG	UGAGGAGAAGUGUGGAUCAAUG	1	0	23	0	2 cited is not ma	Yes	fn-111	mb-01011	ax-1011011	ku-01	ss-111111101100
PID0587	Lin2016-hq	Rhsol	Rhi-milR-128		SRR1994871	8692379	10.4689	91	82	0.901099	UGAGGAGAAGUGUGGAUCAAUGC	GUUUGUACAGUGCCCUCAGG	UGAGGAGAAGUGUGGAUCAAUG	8	0	22	0	2 cited is not ma	Yes	fn-111	mb-01011	ax-1011011	ku-01	ss-111111101100
PID0587	Lin2016-hq	Rhsol	Rhi-milR-128		SRR1994874	9302637	11.1796	104	97	0.932692	UGAGGAGAAGUGUGGAUCAAUGC	GUUUGUACAGUGCCCUCAGG	UGAGGAGAAGUGUGGAUCAAUG	3	0	22	0	2 cited is not ma	Yes	fn-111	mb-01011	ax-1011011	ku-01	ss-111111101100
PID0587	Lin2016-hq	Rhsol	Rhi-milR-128		SRR1994877	6052857	15.1994	92	85	0.923913	UGAGGAGAAGUGUGGAUCAAUGC	GUUUGUACAGUGCCCUCAGG	UGAGGAGAAGUGUGGAUCAAUG	5	0	21	0	2 cited is not ma	Yes	fn-111	mb-01011	ax-1011011	ku-01	ss-111111101100
PID0588	Lin2016-hq	Rhsol	Rhi-milR-19		SRR1994875	4270606	2.57575	11	10	0.909091	AGGAGCUGGAUCUCAAGAUGCGUC	CUCAGUCAGAUCAAGCACUCG	AGAGGAGCUGGAUCUCAAGAUGC	1	0	3	0	2 cited is not ma	Yes	fn-111	mb-01010	ax-1001011	ku-01	ss-111111101000
PID0588	Lin2016-hq	Rhsol	Rhi-milR-19		SRR1994874	9302637	3.54738	33	28	0.848485	AGGAGCUGGAUCUCAAGAUGCGUC	CUCAGUCAGAUCAAGCACUCG	AGAGGAGCUGGAUCUCAAGAUGC	3	0	6	0	2 cited is not ma	Yes	fn-111	mb-01010	ax-1001011	ku-01	ss-111111101000
PID0588	Lin2016-hq	Rhsol	Rhi-milR-19		SRR1994873	8626632	2.43432	21	15	0.714286	AGGAGCUGGAUCUCAAGAUGCGUC	CUCAGUCAGAUCAAGCACUCG	AGAGGAGCUGGAUCUCAAGAUGC	2	0	3	0	2 cited is not ma	No	fn-001	mb-01010	ax-1001011	ku-01	ss-111110101000
PID0588	Lin2016-hq	Rhsol	Rhi-milR-19		SRR1994877	6052857	5.12155	31	22	0.709677	AGGAGCUGGAUCUCAAGAUGCGUC	CUCAGUCAGAUCAAGCACUCG	AGAGGAGCUGGAUCUCAAGAUGC	1	0	6	0	2 cited is not ma	No	fn-101	mb-01010	ax-1001011	ku-01	ss-111110101000
PID0588	Lin2016-hq	Rhsol	Rhi-milR-19		SRR1994872	9065193	2.53718	23	19	0.826087	AGAGGAGCUGGAUCUCAAGAUGC	AGUCAGAUCAAGCACUCGU	AGAGGAGCUGGAUCUCAAGAUGC	3	0	3	0	1 cited is ma	Yes	fn-111	mb-01011	ax-1001011	ku-01	ss-111111101000
PID0588	Lin2016-hq	Rhsol	Rhi-milR-19		SRR1994876	6833927	4.53619	31	27	0.870968	AGGAGCUGGAUCUCAAGAUGCG	CAGUCAGAUCAAGCACUCG	AGAGGAGCUGGAUCUCAAGAUGC	2	0	4	0	2 cited is not ma	Yes	fn-111	mb-01011	ax-1001011	ku-01	ss-111111101000
PID0588	Lin2016-hq	Rhsol	Rhi-milR-19		SRR1994871	8692379	5.29199	46	31	0.673913	AGAGGAGCUGGAUCUCAAGAUGC	AGUCAGAUCAAGCACUCGU	AGAGGAGCUGGAUCUCAAGAUGC	6	0	6	0	1 cited is ma	No	fn-101	mb-01011	ax-1001011	ku-01	ss-111110101000
PID0590	Lin2016-hq	Rhsol	Rhi-milR-153		SRR1994872	9065193	1.21343	11	11	1	UGUGUUGUUUUGAUUUCCUUGCAG	GCAAUGAUCUUCGAGAAGGCUACU	UGUGUUGUUUUGAUUUCCUUGCA	0	0	10	0	3 cited not expressed	Yes	fn-111	mb-01011	ax-1001111	ku-01	ss-111111101110
PID0590	Lin2016-hq	Rhsol	Rhi-milR-153		SRR1994876	6833927	0.877973	6	6	1	UGUGUUGUUUUGAUUUCCUUGCAG	GCAAUGAUCUUCGAGAAGGCUACU	UGUGUUGUUUUGAUUUCCUUGCA	0	0	6	0	3 cited not expressed	Yes	fn-111	mb-01011	ax-1001111	ku-01	ss-111111101110
PID0590	Lin2016-hq	Rhsol	Rhi-milR-153		SRR1994873	8626632	2.08656	18	18	1	UGUGUUGUUUUGAUUUCCUUGCAG	GCAAUGAUCUUCGAGAAGGCUACU	UGUGUUGUUUUGAUUUCCUUGCA	0	0	15	0	3 cited not expressed	Yes	fn-111	mb-01011	ax-1001111	ku-01	ss-111111101110
PID0590	Lin2016-hq	Rhsol	Rhi-milR-153		SRR1994871	8692379	6.9026	60	60	1	UGUGUUGUUUUGAUUUCCUUGCAG	GCAAUGAUCUUCGAGAAGGCUACU	UGUGUUGUUUUGAUUUCCUUGCA	0	0	49	0	3 cited not expressed	Yes	fn-111	mb-01011	ax-1001111	ku-01	ss-111111101110
PID0590	Lin2016-hq	Rhsol	Rhi-milR-153		SRR1994874	9302637	1.39745	13	13	1	UGUGUUGUUUUGAUUUCCUUGCAG	GCAAUGAUCUUCGAGAAGGCUACU	UGUGUUGUUUUGAUUUCCUUGCA	0	0	9	0	3 cited not expressed	Yes	fn-111	mb-01011	ax-1001111	ku-01	ss-111111101110
PID0590	Lin2016-hq	Rhsol	Rhi-milR-153		SRR1994877	6052857	7.76493	47	47	1	UGUGUUGUUUUGAUUUCCUUGCAG	GCAAUGAUCUUCGAGAAGGCUACU	UGUGUUGUUUUGAUUUCCUUGCA	0	0	42	0	3 cited not expressed	Yes	fn-111	mb-01011	ax-1001111	ku-01	ss-111111101110
PID0590	Lin2016-hq	Rhsol	Rhi-milR-153		SRR1994875	4270606	1.17079	5	5	1	UGUGUUGUUUUGAUUUCCUUGCAG	GCAAUGAUCUUCGAGAAGGCUACU	UGUGUUGUUUUGAUUUCCUUGCA	0	0	3	0	3 cited not expressed	Yes	fn-111	mb-01011	ax-1001011	ku-01	ss-101111101110
PID0591	Lin2016-hq	Rhsol	Rhi-milR-51		SRR1994875	4270606	1.63911	7	7	1	CCCGAGAUCGUGAGCUCUGAAGAC	CUUCAUCCUCUACACUUCGGGUU	CCGAGAUCGUGAGCUCUGAAGAC	0	0	2	0	3 cited not expressed	Yes	fn-111	mb-01011	ax-1001011	ku-01	ss-101111101110
PID0591	Lin2016-hq	Rhsol	Rhi-milR-51		SRR1994873	8626632	2.43432	21	21	1	CCCGAGAUCGUGAGCUCUGAAGA	UUCAUCCUCUACACUUCGGGUU	CCGAGAUCGUGAGCUCUGAAGAC	0	0	3	0	3 cited not expressed	Yes	fn-111	mb-01010	ax-1001011	ku-01	ss-101111101100
PID0591	Lin2016-hq	Rhsol	Rhi-milR-51		SRR1994872	9065193	5.29498	48	48	1	CCCGAGAUCGUGAGCUCUGAAGACC	UCUUCAUCCUCUACACUUCGGGUU	CCGAGAUCGUGAGCUCUGAAGAC	0	0	9	0	3 cited not expressed	Yes	fn-111	mb-01011	ax-1001001	ku-01	ss-101011101100
PID0591	Lin2016-hq	Rhsol	Rhi-milR-51		SRR1994876	6833927	2.63392	18	18	1	UCCCGAGAUCGUGAGCUCUGAAGAC	CUUCAUCCUCUACACUUCGGGUUC	CCGAGAUCGUGAGCUCUGAAGAC	0	0	5	0	3 cited not expressed	Yes	fn-111	mb-01010	ax-1001001	ku-01	ss-101011101110
PID0591	Lin2016-hq	Rhsol	Rhi-milR-51		SRR1994874	9302637	1.82744	17	17	1	CCGAGAUCGUGAGCUCUGAAGACCC	CUCUUCAUCCUCUACACUUCGGGU	CCGAGAUCGUGAGCUCUGAAGAC	0	0	2	0	3 cited not expressed	No	fn-011	mb-01110	ax-1001001	ku-01	ss-101011101100
PID0591	Lin2016-hq	Rhsol	Rhi-milR-51		SRR1994877	6052857	0.495634	3	3	1	CGUGAGCUCUGAAGACCCCCUCUU	CUUCAUCCUCUACACUUCGGGU	CCGAGAUCGUGAGCUCUGAAGAC	0	0	1	0	3 cited not expressed	No	fn-011	mb-00010	ax-1001011	ku-01	ss-100111101100
PID0591	Lin2016-hq	Rhsol	Rhi-milR-51		SRR1994871	8692379	0	0	0	NA	CCGAGAUCGUGAGCUCUGAAGAC	CUUCAUCCUCUACACUUCGGGU	CCGAGAUCGUGAGCUCUGAAGAC	0	0	0	0	4 locus not expressed	No	fn-001	mb-01011	ax-1001011	ku-01	ss-000110001100
PID0592	Lin2016-hq	Rhsol	Rhi-milR-68		SRR1994873	8626632	12.2875	106	105	0.990566	UGAGGAUCUGUAUUUGUGGAGG	AUCGCCUGUACCACGUUUCAUU	GAGGAUCUGUAUUUGUGGAGGGG	0	0	25	0	3 cited not expressed	Yes	fn-111	mb-01111	ax-1001011	ku-01	ss-111111101100
PID0592	Lin2016-hq	Rhsol	Rhi-milR-68		SRR1994872	9065193	15.2231	138	138	1	UGAGGAUCUGUAUUUGUGGAGG	AUCGCCUGUACCACGUUUCAUU	GAGGAUCUGUAUUUGUGGAGGGG	0	0	22	0	3 cited not expressed	Yes	fn-111	mb-01011	ax-1001011	ku-01	ss-111111101100
PID0592	Lin2016-hq	Rhsol	Rhi-milR-68		SRR1994877	6052857	3.13901	19	19	1	UGAGGAUCUGUAUUUGUGGAGG	AUCGCCUGUACCACGUUUCAUU	GAGGAUCUGUAUUUGUGGAGGGG	0	0	6	0	3 cited not expressed	Yes	fn-111	mb-01011	ax-1001011	ku-01	ss-111111101100
PID0592	Lin2016-hq	Rhsol	Rhi-milR-68		SRR1994876	6833927	5.56049	38	38	1	UGAGGAUCUGUAUUUGUGGAGGG	CAUCGCCUGUACCACGUUUCAUU	GAGGAUCUGUAUUUGUGGAGGGG	0	0	5	0	3 cited not expressed	Yes	fn-111	mb-01111	ax-1001011	ku-01	ss-111111101100
PID0592	Lin2016-hq	Rhsol	Rhi-milR-68		SRR1994874	9302637	9.78217	91	89	0.978022	UGAGGAUCUGUAUUUGUGGAGGGG	UCAUCGCCUGUACCACGUUUCAUU	GAGGAUCUGUAUUUGUGGAGGGG	0	0	18	0	3 cited not expressed	Yes	fn-111	mb-01111	ax-1001011	ku-01	ss-111111101100
PID0592	Lin2016-hq	Rhsol	Rhi-milR-68		SRR1994875	4270606	2.10743	9	8	0.888889	UGAGGAUCUGUAUUUGUGGAGGGG	UCAUCGCCUGUACCACGUUUCAUU	GAGGAUCUGUAUUUGUGGAGGGG	0	0	2	0	3 cited not expressed	No	fn-011	mb-01011	ax-1001011	ku-01	ss-111111101100
PID0592	Lin2016-hq	Rhsol	Rhi-milR-68		SRR1994871	8692379	1.26548	11	10	0.909091	UGAGGAUCUGUAUUUGUGGAGGGG	UCAUCGCCUGUACCACGUUUCAUU	GAGGAUCUGUAUUUGUGGAGGGG	0	0	3	0	3 cited not expressed	No	fn-011	mb-01011	ax-1001011	ku-01	ss-111111101100
PID0593	Lin2016-hq	Rhsol	Rhi-milR-1		SRR1994871	8692379	3.22121	28	17	0.607143	AAAGAGGAGUGUUCUGAUGGAGGU	CUUCCUUACGAUGUUCCUUGAUUG	AAAGAGGAGUGUUCUGAUGGAG	0	0	6	0	3 cited not expressed	No	fn-101	mb-01111	ax-1001011	ku-01	ss-111110101100
PID0593	Lin2016-hq	Rhsol	Rhi-milR-1		SRR1994877	6052857	4.29549	26	17	0.653846	AAAGAGGAGUGUUCUGAUGGAGGU	CUUCCUUACGAUGUUCCUUGAUUG	AAAGAGGAGUGUUCUGAUGGAG	0	0	5	0	3 cited not expressed	No	fn-101	mb-01011	ax-1001011	ku-01	ss-111110101110
PID0593	Lin2016-hq	Rhsol	Rhi-milR-1		SRR1994872	9065193	1.32374	12	8	0.666667	CAAAGAGGAGUGUUCUGAUGGAGG	UUCCUUACGAUGUUCCUUGAUUGC	AAAGAGGAGUGUUCUGAUGGAG	0	0	4	0	3 cited not expressed	No	fn-101	mb-01111	ax-1001011	ku-01	ss-111110101000
PID0593	Lin2016-hq	Rhsol	Rhi-milR-1		SRR1994876	6833927	3.65822	25	15	0.6	CAAAGAGGAGUGUUCUGAUGGAGG	UUCCUUACGAUGUUCCUUGAUUGC	AAAGAGGAGUGUUCUGAUGGAG	0	0	8	0	3 cited not expressed	No	fn-101	mb-01011	ax-1001011	ku-01	ss-111110101000
PID0593	Lin2016-hq	Rhsol	Rhi-milR-1		SRR1994875	4270606	0.702476	3	2	0.666667	AAAGAGGAGUGUUCUGAUGGAGG	UUCCUUACGAUGUUCCUUGAUUG	AAAGAGGAGUGUUCUGAUGGAG	0	0	1	0	3 cited not expressed	No	fn-001	mb-01011	ax-1001011	ku-01	ss-110110101100
PID0593	Lin2016-hq	Rhsol	Rhi-milR-1		SRR1994873	8626632	1.62288	14	11	0.785714	CAAAGAGGAGUGUUCUGAUGGAGG	UUCCUUACGAUGUUCCUUGAUUGC	AAAGAGGAGUGUUCUGAUGGAG	0	0	2	0	3 cited not expressed	No	fn-101	mb-01011	ax-1001011	ku-01	ss-111110101000
PID0593	Lin2016-hq	Rhsol	Rhi-milR-1		SRR1994874	9302637	1.28996	12	6	0.5	AAAGAGGAGUGUUCUGAUGGAGG	UUCCUUACGAUGUUCCUUGAUUG	AAAGAGGAGUGUUCUGAUGGAG	0	0	3	0	3 cited not expressed	No	fn-101	mb-01011	ax-1001011	ku-01	ss-111110001100
PID0594	Lin2016-hq	Rhsol	Rhi-milR-97		SRR1994877	6052857	23.1296	140	122	0.871429	UAAGGCAGUGACUGAAUAACUAGG	UAAGGCAGCAGUGAGCUAUCUACA	UAAAUAUCUUACUGGGCUUAAG	3	0	53	0	2 cited is not ma	Yes	fn-111	mb-00110	ax-1011011	ku-01	ss-111111111110
PID0594	Lin2016-hq	Rhsol	Rhi-milR-97		SRR1994872	9065193	14.3406	130	79	0.607692	UAAGGCAGUGACUGAAUAACUAGG	UAAGGCAGCAGUGAGCUAUCUACA	UAAAUAUCUUACUGGGCUUAAG	2	0	26	0	2 cited is not ma	No	fn-101	mb-00110	ax-1011011	ku-01	ss-111110111100
PID0594	Lin2016-hq	Rhsol	Rhi-milR-97		SRR1994876	6833927	21.803	149	115	0.771812	UAAGGCAGUGACUGAAUAACUAGG	UAAGGCAGCAGUGAGCUAUCUACA	UAAAUAUCUUACUGGGCUUAAG	3	0	38	0	2 cited is not ma	No	fn-101	mb-00110	ax-1011011	ku-01	ss-111110111100
PID0594	Lin2016-hq	Rhsol	Rhi-milR-97		SRR1994875	4270606	13.3471	57	41	0.719298	UAAGGCAGUGACUGAAUAACUAGG	UAAGGCAGCAGUGAGCUAUCUACA	UAAAUAUCUUACUGGGCUUAAG	0	0	19	0	3 cited not expressed	No	fn-101	mb-00110	ax-1011011	ku-01	ss-111110111100
PID0594	Lin2016-hq	Rhsol	Rhi-milR-97		SRR1994873	8626632	25.5024	220	156	0.709091	UAAGGCAGUGACUGAAUAACUAGG	UAAGGCAGCAGUGAGCUAUCUACA	UAAAUAUCUUACUGGGCUUAAG	2	0	84	0	2 cited is not ma	No	fn-101	mb-00110	ax-1011011	ku-01	ss-111110111100
PID0594	Lin2016-hq	Rhsol	Rhi-milR-97		SRR1994874	9302637	23.7567	221	167	0.755656	UAAGGCAGUGACUGAAUAACUAGG	UAAGGCAGCAGUGAGCUAUCUACA	UAAAUAUCUUACUGGGCUUAAG	0	0	82	0	3 cited not expressed	No	fn-101	mb-00110	ax-1011011	ku-01	ss-111110111100
PID0594	Lin2016-hq	Rhsol	Rhi-milR-97		SRR1994871	8692379	54.9907	478	344	0.719665	UAAGGCAGUGACUGAAUAACUAGG	UAAGGCAGCAGUGAGCUAUCUACA	UAAAUAUCUUACUGGGCUUAAG	6	0	79	0	2 cited is not ma	No	fn-101	mb-00010	ax-1011011	ku-01	ss-111110111100
PID0597	Lin2016-hq	Rhsol	Rhi-milR-137		SRR1994876	6833927	2.78025	19	16	0.842105	UGGAGCUGGAGGACUAAUUUUGC	AAUCUGUGGUGCCUACAGGCCUCCUGC	UGGAGCUGGAGGACUAAUUUUG	2	0	5	0	2 cited is not ma	Yes	fn-111	mb-01111	ax-1001011	ku-01	ss-111111101000
PID0597	Lin2016-hq	Rhsol	Rhi-milR-137		SRR1994877	6052857	1.4869	9	9	1	UGGAGCUGGAGGACUAAUUUUGC	AAUCUGUGGUGCCUACAGGCCUCCUGC	UGGAGCUGGAGGACUAAUUUUG	0	0	6	0	3 cited not expressed	Yes	fn-111	mb-01011	ax-1001011	ku-01	ss-111111101010
PID0597	Lin2016-hq	Rhsol	Rhi-milR-137		SRR1994872	9065193	1.21343	11	9	0.818182	UGGAGCUGGAGGACUAAUUUUGC	AAUCUGUGGUGCCUACAGGCCUCCUGC	UGGAGCUGGAGGACUAAUUUUG	0	0	3	0	3 cited not expressed	No	fn-011	mb-01011	ax-1001011	ku-01	ss-111111101000
PID0597	Lin2016-hq	Rhsol	Rhi-milR-137		SRR1994873	8626632	2.55024	22	16	0.727273	UGGAGCUGGAGGACUAAUUUUGC	AAUCUGUGGUGCCUACAGGCCUCCUGC	UGGAGCUGGAGGACUAAUUUUG	0	0	8	0	3 cited not expressed	No	fn-101	mb-01111	ax-1001011	ku-01	ss-111110101000
PID0597	Lin2016-hq	Rhsol	Rhi-milR-137		SRR1994874	9302637	2.57991	24	17	0.708333	UGGAGCUGGAGGACUAAUUUUGC	AAUCUGUGGUGCCUACAGGCCUCCUGC	UGGAGCUGGAGGACUAAUUUUG	1	0	6	0	2 cited is not ma	No	fn-101	mb-01011	ax-1001011	ku-01	ss-111110101000
PID0597	Lin2016-hq	Rhsol	Rhi-milR-137		SRR1994871	8692379	7.82294	68	49	0.720588	UGGAGCUGGAGGACUAAUUUUG	AUCUGUGGUGCCUACAGGCCUCCUGC	UGGAGCUGGAGGACUAAUUUUG	8	0	8	0	1 cited is ma	No	fn-101	mb-01011	ax-1001011	ku-01	ss-111110101000
PID0597	Lin2016-hq	Rhsol	Rhi-milR-137		SRR1994875	4270606	2.10743	9	7	0.777778	UGGAGCUGGAGGACUAAUUUUG	AUCUGUGGUGCCUACAGGCCUCCUGC	UGGAGCUGGAGGACUAAUUUUG	1	0	1	0	1 cited is ma	No	fn-101	mb-01011	ax-1001011	ku-01	ss-110110101000
PID0598	Lin2016-hq	Rhsol	Rhi-milR-45		SRR1994872	9065193	24.048	218	27	0.123853	UCAGGGAAUUUGGCAAAGAAGUC	CUUCACUGUCUUAUUCCUGG	CAGGGAAUUUGGCAAAGAAGUC	0	0	6	0	3 cited not expressed	No	fn-101	mb-01111	ax-1001011	ku-01	ss-111111001100
PID0598	Lin2016-hq	Rhsol	Rhi-milR-45		SRR1994873	8626632	25.8502	223	30	0.134529	UCAGGGAAUUUGGCAAAGAAGUC	CUUCACUGUCUUAUUCCUGG	CAGGGAAUUUGGCAAAGAAGUC	2	0	7	0	2 cited is not ma	No	fn-101	mb-01111	ax-1001011	ku-01	ss-111111001100
PID0598	Lin2016-hq	Rhsol	Rhi-milR-45		SRR1994871	8692379	106.53	926	73	0.0788337	UCAGGGAAUUUGGCAAAGAAGUC	CUUCACUGUCUUAUUCCUGG	CAGGGAAUUUGGCAAAGAAGUC	5	0	29	0	2 cited is not ma	No	fn-101	mb-01111	ax-1001011	ku-01	ss-111111001100
PID0598	Lin2016-hq	Rhsol	Rhi-milR-45		SRR1994874	9302637	36.5488	340	44	0.129412	UCAGGGAAUUUGGCAAAGAAGUC	CUUCACUGUCUUAUUCCUGG	CAGGGAAUUUGGCAAAGAAGUC	0	0	6	0	3 cited not expressed	No	fn-101	mb-01111	ax-1001011	ku-01	ss-111111001100
PID0598	Lin2016-hq	Rhsol	Rhi-milR-45		SRR1994876	6833927	48.4348	331	40	0.120846	UCAGGGAAUUUGGCAAAGAAGUC	CUUCACUGUCUUAUUCCUGG	CAGGGAAUUUGGCAAAGAAGUC	0	0	12	0	3 cited not expressed	No	fn-101	mb-01011	ax-1001011	ku-01	ss-111111001100
PID0598	Lin2016-hq	Rhsol	Rhi-milR-45		SRR1994877	6052857	113.831	689	71	0.103048	UCAGGGAAUUUGGCAAAGAAGUC	CUUCACUGUCUUAUUCCUGG	CAGGGAAUUUGGCAAAGAAGUC	0	0	24	0	3 cited not expressed	No	fn-101	mb-01011	ax-1001011	ku-01	ss-111111001100
PID0598	Lin2016-hq	Rhsol	Rhi-milR-45		SRR1994875	4270606	24.8208	106	13	0.122642	AUCCUUCACUGUCUUAUUCCUGG	UCAGGGAAUUUGGCAAAGAAGUCUUC	CAGGGAAUUUGGCAAAGAAGUC	0	0	2	0	3 cited not expressed	No	fn-101	mb-00010	ax-1001011	ku-01	ss-111111001100
PID0599	Lin2016-hq	Rhsol	Rhi-milR-89		SRR1994872	9065193	7.2806	66	66	1	GUCGGGGUGCGUAUCGAGGGAAG	ACCGUCCGGGUCGCGCCCCCUGAGCU	GUCGGGGUGCGUAUCGAGGGA	2	0	11	0	2 cited is not ma	Yes	fn-111	mb-01011	ax-1001011	ku-01	ss-101111101100
PID0599	Lin2016-hq	Rhsol	Rhi-milR-89		SRR1994873	8626632	4.6368	40	40	1	GUCGGGGUGCGUAUCGAGGGAAGA	CACCGUCCGGGUCGCGCCCCCUGAGCU	GUCGGGGUGCGUAUCGAGGGA	3	0	6	0	2 cited is not ma	Yes	fn-111	mb-01011	ax-1001011	ku-01	ss-101111101100
PID0599	Lin2016-hq	Rhsol	Rhi-milR-89		SRR1994874	9302637	1.50495	14	14	1	GUCGGGGUGCGUAUCGAGGGAAG	ACCGUCCGGGUCGCGCCCCCUGAGCU	GUCGGGGUGCGUAUCGAGGGA	1	0	2	0	2 cited is not ma	No	fn-011	mb-01011	ax-1001011	ku-01	ss-101111101100
PID0599	Lin2016-hq	Rhsol	Rhi-milR-89		SRR1994877	6052857	0.495634	3	3	1	GUCGGGGUGCGUAUCGAGGGAA	CCGUCCGGGUCGCGCCCCCUGAGCU	GUCGGGGUGCGUAUCGAGGGA	0	0	1	0	3 cited not expressed	No	fn-011	mb-01011	ax-1001011	ku-01	ss-100111101110
PID0599	Lin2016-hq	Rhsol	Rhi-milR-89		SRR1994876	6833927	0	0	0	NA	GUCGGGGUGCGUAUCGAGGGA	CGUCCGGGUCGCGCCCCCUGAGCU	GUCGGGGUGCGUAUCGAGGGA	0	0	0	0	4 locus not expressed	No	fn-001	mb-01011	ax-1001011	ku-01	ss-000110001100
PID0599	Lin2016-hq	Rhsol	Rhi-milR-89		SRR1994875	4270606	0	0	0	NA	GUCGGGGUGCGUAUCGAGGGA	CGUCCGGGUCGCGCCCCCUGAGCU	GUCGGGGUGCGUAUCGAGGGA	0	0	0	0	4 locus not expressed	No	fn-001	mb-01011	ax-1001011	ku-01	ss-000110001100
PID0599	Lin2016-hq	Rhsol	Rhi-milR-89		SRR1994871	8692379	0	0	0	NA	GUCGGGGUGCGUAUCGAGGGA	CGUCCGGGUCGCGCCCCCUGAGCU	GUCGGGGUGCGUAUCGAGGGA	0	0	0	0	4 locus not expressed	No	fn-001	mb-01011	ax-1001011	ku-01	ss-000110001100
PID0600	Lin2016-hq	Rhsol	Rhi-milR-110		SRR1994874	9302637	4.29986	40	35	0.875	UAGUAGUUGUUCUGUAUGGAGGC	UCCCCAUACAUCUGAAUAGACUAUUUUG	UAGUAGUUGUUCUGUAUGGAGG	2	0	15	0	2 cited is not ma	Yes	fn-111	mb-01011	ax-1011011	ku-01	ss-111111101010
PID0600	Lin2016-hq	Rhsol	Rhi-milR-110		SRR1994872	9065193	2.97843	27	19	0.703704	UAGUAGUUGUUCUGUAUGGAGGC	UCCCCAUACAUCUGAAUAGACUAUUUUG	UAGUAGUUGUUCUGUAUGGAGG	3	0	6	0	2 cited is not ma	No	fn-101	mb-01011	ax-1011011	ku-01	ss-111110101010
PID0600	Lin2016-hq	Rhsol	Rhi-milR-110		SRR1994876	6833927	2.19493	15	13	0.866667	UAGUAGUUGUUCUGUAUGGAGG	CCAUACAUCUGAAUAGACUAUUUUG	UAGUAGUUGUUCUGUAUGGAGG	3	0	3	0	1 cited is ma	Yes	fn-111	mb-01011	ax-1011011	ku-01	ss-101111101100
PID0600	Lin2016-hq	Rhsol	Rhi-milR-110		SRR1994873	8626632	3.59352	31	23	0.741935	UAGUAGUUGUUCUGUAUGGAGGC	UCCCCAUACAUCUGAAUAGACUAUUUUG	UAGUAGUUGUUCUGUAUGGAGG	2	0	8	0	2 cited is not ma	No	fn-101	mb-01011	ax-1011011	ku-01	ss-111110101010
PID0600	Lin2016-hq	Rhsol	Rhi-milR-110		SRR1994877	6052857	8.42577	51	39	0.764706	UAGUAGUUGUUCUGUAUGGAGGC	UCCCCAUACAUCUGAAUAGACUAUUUUG	UAGUAGUUGUUCUGUAUGGAGG	2	0	23	0	2 cited is not ma	No	fn-101	mb-01011	ax-1011011	ku-01	ss-111110101010
PID0600	Lin2016-hq	Rhsol	Rhi-milR-110		SRR1994875	4270606	2.34159	10	7	0.7	UAGUAGUUGUUCUGUAUGGAGGC	UCCCCAUACAUCUGAAUAGACUAUUUUG	UAGUAGUUGUUCUGUAUGGAGG	1	0	2	0	2 cited is not ma	No	fn-101	mb-01011	ax-1011011	ku-01	ss-111110101000
PID0600	Lin2016-hq	Rhsol	Rhi-milR-110		SRR1994871	8692379	3.4513	30	22	0.733333	UAGUAGUUGUUCUGUAUGGAGGC	UCCCCAUACAUCUGAAUAGACUAUUUUG	UAGUAGUUGUUCUGUAUGGAGG	2	0	5	0	2 cited is not ma	No	fn-101	mb-01011	ax-1011011	ku-01	ss-111110101000
PID0601	Lin2016-hq	Rhsol	Rhi-milR-16		SRR1994871	8692379	63.2738	550	26	0.0472727	UAGACCGUCCACUCUGAACUAG	GAGAUAGAGCAGGGCGAAUACC	AGACCGUCCACUCUGAACUAGCG	0	0	9	0	3 cited not expressed	No	fn-101	mb-01111	ax-1001011	ku-01	ss-101111001100
PID0601	Lin2016-hq	Rhsol	Rhi-milR-16		SRR1994876	6833927	34.6799	237	12	0.0506329	UAGACCGUCCACUCUGAACUAGCG	CUGAGAUAGAGCAGGGCGAAUACC	AGACCGUCCACUCUGAACUAGCG	0	0	7	0	3 cited not expressed	No	fn-101	mb-01011	ax-1001011	ku-01	ss-101111001100
PID0601	Lin2016-hq	Rhsol	Rhi-milR-16		SRR1994873	8626632	185.008	1596	7	0.00438596	UAGACCGUCCACUCUGAACUAGCG	CUGAGAUAGAGCAGGGCGAAUACC	AGACCGUCCACUCUGAACUAGCG	0	0	2	0	3 cited not expressed	No	fn-001	mb-01011	ax-1001011	ku-01	ss-101111001100
PID0601	Lin2016-hq	Rhsol	Rhi-milR-16		SRR1994872	9065193	0	0	0	NA	AGACCGUCCACUCUGAACUAGCG	CUGAGAUAGAGCAGGGCGAAUAC	AGACCGUCCACUCUGAACUAGCG	0	0	0	0	4 locus not expressed	No	fn-001	mb-01011	ax-1001011	ku-01	ss-000110001100
PID0601	Lin2016-hq	Rhsol	Rhi-milR-16		SRR1994875	4270606	0	0	0	NA	AGACCGUCCACUCUGAACUAGCG	CUGAGAUAGAGCAGGGCGAAUAC	AGACCGUCCACUCUGAACUAGCG	0	0	0	0	4 locus not expressed	No	fn-001	mb-01011	ax-1001011	ku-01	ss-000110001100
PID0601	Lin2016-hq	Rhsol	Rhi-milR-16		SRR1994874	9302637	0	0	0	NA	AGACCGUCCACUCUGAACUAGCG	CUGAGAUAGAGCAGGGCGAAUAC	AGACCGUCCACUCUGAACUAGCG	0	0	0	0	4 locus not expressed	No	fn-001	mb-01011	ax-1001011	ku-01	ss-000110001100
PID0601	Lin2016-hq	Rhsol	Rhi-milR-16		SRR1994877	6052857	0	0	0	NA	AGACCGUCCACUCUGAACUAGCG	CUGAGAUAGAGCAGGGCGAAUAC	AGACCGUCCACUCUGAACUAGCG	0	0	0	0	4 locus not expressed	No	fn-001	mb-01011	ax-1001011	ku-01	ss-000110001100
PID0602	Lin2016-hq	Rhsol	Rhi-milR-175		SRR1994875	4270606	18.4985	79	79	1	UUUAAUCGAGGACGGACCAUAG	CUGCUCUCGAUUAAAUU	UUUAAUCGAGGACGGACCAUAG	5	0	5	0	1 cited is ma	Yes	fn-111	mb-00111	ax-1011011	ku-01	ss-111111111000
PID0602	Lin2016-hq	Rhsol	Rhi-milR-175		SRR1994874	9302637	22.5742	210	210	1	UUUAAUCGAGGACGGACCAUAG	CUGCUCUCGAUUAAAUU	UUUAAUCGAGGACGGACCAUAG	10	0	10	0	1 cited is ma	Yes	fn-111	mb-00111	ax-1011011	ku-01	ss-111111111000
PID0602	Lin2016-hq	Rhsol	Rhi-milR-175		SRR1994877	6052857	48.2417	292	292	1	UUUAAUCGAGGACGGACCAUAG	CUGCUCUCGAUUAAAUU	UUUAAUCGAGGACGGACCAUAG	5	0	5	0	1 cited is ma	Yes	fn-111	mb-00111	ax-1011011	ku-01	ss-111111111000
PID0602	Lin2016-hq	Rhsol	Rhi-milR-175		SRR1994872	9065193	24.5996	223	223	1	UUUAAUCGAGGACGGACCAUAG	CUGCUCUCGAUUAAAUU	UUUAAUCGAGGACGGACCAUAG	8	0	8	0	1 cited is ma	Yes	fn-111	mb-00011	ax-1011011	ku-01	ss-111111111000
PID0602	Lin2016-hq	Rhsol	Rhi-milR-175		SRR1994876	6833927	23.7053	162	162	1	UUUAAUCGAGGACGGACCAUAG	CUGCUCUCGAUUAAAUU	UUUAAUCGAGGACGGACCAUAG	5	0	5	0	1 cited is ma	Yes	fn-111	mb-00011	ax-1011011	ku-01	ss-111111111000
PID0602	Lin2016-hq	Rhsol	Rhi-milR-175		SRR1994873	8626632	31.6462	273	273	1	UUUAAUCGAGGACGGACCAUAG	CUGCUCUCGAUUAAAUU	UUUAAUCGAGGACGGACCAUAG	17	0	17	0	1 cited is ma	Yes	fn-111	mb-00011	ax-1011011	ku-01	ss-111111111000
PID0602	Lin2016-hq	Rhsol	Rhi-milR-175		SRR1994871	8692379	30.4865	265	265	1	UUUAAUCGAGGACGGACCAU	UUUCUGCUCUCGAUUAAAUU	UUUAAUCGAGGACGGACCAUAG	16	0	53	0	2 cited is not ma	Yes	fn-111	mb-00011	ax-1011011	ku-01	ss-111111111000
PID0603	Lin2016-hq	Rhsol	Rhi-milR-101		SRR1994876	6833927	1.17063	8	8	1	UACCCGAGGAAGGUGUGGAUC	AAUCCAAUAUCUCUCCUUUGGUAGA	UACCCGAGGAAGGUGUGGAU	1	0	2	0	2 cited is not ma	Yes	fn-111	mb-01011	ax-1011011	ku-01	ss-101111111010
PID0603	Lin2016-hq	Rhsol	Rhi-milR-101		SRR1994874	9302637	2.25742	21	21	1	UACCCGAGGAAGGUGUGGAUC	AAUCCAAUAUCUCUCCUUUGGUAGA	UACCCGAGGAAGGUGUGGAU	1	0	2	0	2 cited is not ma	No	fn-011	mb-01111	ax-1011011	ku-01	ss-101111111000
PID0603	Lin2016-hq	Rhsol	Rhi-milR-101		SRR1994872	9065193	2.86811	26	26	1	UACCCGAGGAAGGUGUGGAUC	AAUCCAAUAUCUCUCCUUUGGUAGA	UACCCGAGGAAGGUGUGGAU	0	0	4	0	3 cited not expressed	Yes	fn-111	mb-01011	ax-1011011	ku-01	ss-101111111000
PID0603	Lin2016-hq	Rhsol	Rhi-milR-101		SRR1994873	8626632	8.34625	72	72	1	UACCCGAGGAAGGUGUGGAUC	AAUCCAAUAUCUCUCCUUUGGUAGA	UACCCGAGGAAGGUGUGGAU	0	0	19	0	3 cited not expressed	Yes	fn-111	mb-01011	ax-1011011	ku-01	ss-101111111000
PID0603	Lin2016-hq	Rhsol	Rhi-milR-101		SRR1994875	4270606	3.27822	14	14	1	UACCCGAGGAAGGUGUGGAUC	AAUCCAAUAUCUCUCCUUUGGUAGA	UACCCGAGGAAGGUGUGGAU	0	0	1	0	3 cited not expressed	No	fn-011	mb-01011	ax-1011011	ku-01	ss-100111111000
PID0603	Lin2016-hq	Rhsol	Rhi-milR-101		SRR1994871	8692379	1.26548	11	11	1	UUACCCGAGGAAGGUGUGGAUCU	CAAUCCAAUAUCUCUCCUUUGGUAGAG	UACCCGAGGAAGGUGUGGAU	0	0	2	0	3 cited not expressed	No	fn-011	mb-01011	ax-1011011	ku-01	ss-101111111000
PID0603	Lin2016-hq	Rhsol	Rhi-milR-101		SRR1994877	6052857	2.31296	14	14	1	AGAUGUUACCCGAGGAAGGUGUGGA	CAAUAUCUCUCCUUUGGUAGAGUGGAC	UACCCGAGGAAGGUGUGGAU	0	0	1	0	3 cited not expressed	No	fn-011	mb-01011	ax-1001001	ku-01	ss-100011101100
PID0604	Lin2016-hq	Rhsol	Rhi-milR-7		SRR1994875	4270606	0.936635	4	3	0.75	CAAUCCUGUAUGAGACUCUGUGC	AAGACACACAUCCAGGACAUGUU	AAUCCUGUAUGAGACUCUGUGC	0	0	3	0	3 cited not expressed	No	fn-101	mb-01011	ax-1001111	ku-01	ss-111110101110
PID0604	Lin2016-hq	Rhsol	Rhi-milR-7		SRR1994873	8626632	0.927361	8	8	1	CAAUCCUGUAUGAGACUCUGUGC	AAGACACACAUCCAGGACAUGUU	AAUCCUGUAUGAGACUCUGUGC	0	0	4	0	3 cited not expressed	No	fn-011	mb-01011	ax-1001011	ku-01	ss-111111101100
PID0604	Lin2016-hq	Rhsol	Rhi-milR-7		SRR1994871	8692379	1.95574	17	14	0.823529	CAAUCCUGUAUGAGACUCUGUGC	AAGACACACAUCCAGGACAUGUU	AAUCCUGUAUGAGACUCUGUGC	2	0	3	0	2 cited is not ma	Yes	fn-111	mb-01011	ax-1001011	ku-01	ss-111111101100
PID0604	Lin2016-hq	Rhsol	Rhi-milR-7		SRR1994872	9065193	1.98562	18	12	0.666667	CAAUCCUGUAUGAGACUCUGUGC	AAGACACACAUCCAGGACAUGUU	AAUCCUGUAUGAGACUCUGUGC	1	0	3	0	2 cited is not ma	No	fn-001	mb-01011	ax-1001011	ku-01	ss-111110101100
PID0604	Lin2016-hq	Rhsol	Rhi-milR-7		SRR1994874	9302637	1.93494	18	15	0.833333	CAAUCCUGUAUGAGACUCUGUGC	AAGACACACAUCCAGGACAUGUU	AAUCCUGUAUGAGACUCUGUGC	1	0	4	0	2 cited is not ma	Yes	fn-111	mb-01011	ax-1001011	ku-01	ss-101111101100
PID0604	Lin2016-hq	Rhsol	Rhi-milR-7		SRR1994877	6052857	0.991267	6	6	1	UCCUGUAUGAGACUCUGUGCUC	GCAAGACACACAUCCAGGACAU	AAUCCUGUAUGAGACUCUGUGC	0	0	3	0	3 cited not expressed	No	fn-011	mb-01111	ax-1001011	ku-01	ss-111111101100
PID0604	Lin2016-hq	Rhsol	Rhi-milR-7		SRR1994876	6833927	1.75595	12	8	0.666667	GAGCAAGACACACAUCCAGGAC	CCUGUAUGAGACUCUGUGCUCUA	AAUCCUGUAUGAGACUCUGUGC	1	0	3	0	2 cited is not ma	No	fn-001	mb-01111	ax-1001011	ku-01	ss-111110101100
PID0605	Lin2016-hq	Rhsol	Rhi-milR-131		SRR1994876	6833927	2.34126	16	16	1	UUGAUGGAGUGGAAUAUGACCC	GAUAUACCUACUCCAGGAGG	UGAUGGAGUGGAAUAUGACC	0	0	3	0	3 cited not expressed	Yes	fn-111	mb-01011	ax-1001011	ku-01	ss-111111101100
PID0605	Lin2016-hq	Rhsol	Rhi-milR-131		SRR1994872	9065193	0.661872	6	6	1	UUGAUGGAGUGGAAUAUGACCC	GAUAUACCUACUCCAGGAGG	UGAUGGAGUGGAAUAUGACC	0	0	1	0	3 cited not expressed	No	fn-011	mb-01011	ax-1001011	ku-01	ss-110111101100
PID0605	Lin2016-hq	Rhsol	Rhi-milR-131		SRR1994873	8626632	2.08656	18	18	1	CAUUGAUGGAGUGGAAUAUGACCC	GAUAUACCUACUCCAGGAGG	UGAUGGAGUGGAAUAUGACC	1	0	3	0	2 cited is not ma	Yes	fn-111	mb-00011	ax-1001011	ku-01	ss-111111101100
PID0605	Lin2016-hq	Rhsol	Rhi-milR-131		SRR1994871	8692379	0.920346	8	7	0.875	UUGAUGGAGUGGAAUAUGACCC	GAUAUACCUACUCCAGGAGG	UGAUGGAGUGGAAUAUGACC	0	0	1	0	3 cited not expressed	No	fn-011	mb-01011	ax-1001011	ku-01	ss-100111101100
PID0605	Lin2016-hq	Rhsol	Rhi-milR-131		SRR1994874	9302637	2.36492	22	21	0.954545	CAGGAGGCAGCAAUUUGGAUCAG	GAUAUACCUACUCCAGGAGG	UGAUGGAGUGGAAUAUGACC	0	0	6	0	3 cited not expressed	Yes	fn-111	mb-00010	ax-1001011	ku-01	ss-111111101100
PID0605	Lin2016-hq	Rhsol	Rhi-milR-131		SRR1994875	4270606	0.234159	1	1	1	AUUGAUGGAGUGGAAUAUG	GAUAUACCUACUCCAGGAGG	UGAUGGAGUGGAAUAUGACC	0	0	1	0	3 cited not expressed	No	fn-011	mb-01011	ax-1001101	ku-01	ss-100011101110
PID0605	Lin2016-hq	Rhsol	Rhi-milR-131		SRR1994877	6052857	0.660845	4	4	1	GAUGGAGUGGAAUAUGACC	GAUAUACCUACUCCAGGAG	UGAUGGAGUGGAAUAUGACC	0	0	1	0	3 cited not expressed	No	fn-011	mb-01011	ax-1001001	ku-01	ss-100011101100
PID0606	Lin2016-hq	Rhsol	Rhi-milR-177		SRR1994875	4270606	1.40495	6	5	0.833333	UUUGGGCGCAAUGGGAGAGACUA	UCUGACUUCCCCCCAAAUC	UUUGGGCGCAAUGGGAGAGACU	0	0	1	0	3 cited not expressed	No	fn-011	mb-01011	ax-1001011	ku-01	ss-110111101100
PID0606	Lin2016-hq	Rhsol	Rhi-milR-177		SRR1994877	6052857	2.14775	13	8	0.615385	UUUGGGCGCAAUGGGAGAGACU	UCUGACUUCCCCCCAAAUC	UUUGGGCGCAAUGGGAGAGACU	2	0	2	0	1 cited is ma	No	fn-001	mb-01011	ax-1001011	ku-01	ss-101110101100
PID0606	Lin2016-hq	Rhsol	Rhi-milR-177		SRR1994876	6833927	1.75595	12	10	0.833333	UUGGGCGCAAUGGGAGAGACUAGU	UCUGACUUCCCCCCAAAUC	UUUGGGCGCAAUGGGAGAGACU	0	0	2	0	3 cited not expressed	No	fn-011	mb-00010	ax-1001011	ku-01	ss-111111101100
PID0606	Lin2016-hq	Rhsol	Rhi-milR-177		SRR1994873	8626632	1.97064	17	16	0.941176	UUGGGCGCAAUGGGAGAGACUAGU	UCUGACUUCCCCCCAAAUC	UUUGGGCGCAAUGGGAGAGACU	0	0	2	0	3 cited not expressed	No	fn-011	mb-00010	ax-1001011	ku-01	ss-111111101100
PID0606	Lin2016-hq	Rhsol	Rhi-milR-177		SRR1994874	9302637	0.967468	9	8	0.888889	UUUGGGCGCAAUGGGAGAGACU	UCUGACUUCCCCCCAAAUC	UUUGGGCGCAAUGGGAGAGACU	0	0	0	0	3 cited not expressed	No	fn-011	mb-01011	ax-1001011	ku-01	ss-100111101100
PID0606	Lin2016-hq	Rhsol	Rhi-milR-177		SRR1994872	9065193	1.43406	13	10	0.769231	UUUGGGCGCAAUGGGAGAGACUAG	UCUGACUUCCCCCCAAAUC	UUUGGGCGCAAUGGGAGAGACU	0	0	1	0	3 cited not expressed	No	fn-001	mb-01010	ax-1001011	ku-01	ss-110110101100
PID0606	Lin2016-hq	Rhsol	Rhi-milR-177		SRR1994871	8692379	3.33626	29	23	0.793103	UGGGCGCAAUGGGAGAGACUAG	UCUGACUUCCCCCCAAAUC	UUUGGGCGCAAUGGGAGAGACU	0	0	3	0	3 cited not expressed	No	fn-101	mb-00010	ax-1001011	ku-01	ss-101110101100
PID0607	Lin2016-hq	Rhsol	Rhi-milR-174		SRR1994872	9065193	2.31655	21	21	1	UUUAAGGAUUAUGAAAUGGAGGC	CUGCAUAACAAGUCCAAAG	UUUAAGGAUUAUGAAAUGGAGGCU	0	0	5	0	3 cited not expressed	Yes	fn-111	mb-01011	ax-1011011	ku-01	ss-111111101000
PID0607	Lin2016-hq	Rhsol	Rhi-milR-174		SRR1994876	6833927	8.19441	56	51	0.910714	UUUAAGGAUUAUGAAAUGGAGGC	CUGCAUAACAAGUCCAAAG	UUUAAGGAUUAUGAAAUGGAGGCU	1	0	15	0	2 cited is not ma	Yes	fn-111	mb-01011	ax-1011011	ku-01	ss-111111101000
PID0607	Lin2016-hq	Rhsol	Rhi-milR-174		SRR1994873	8626632	2.78208	24	22	0.916667	UUUAAGGAUUAUGAAAUGGAGGC	CUGCAUAACAAGUCCAAAG	UUUAAGGAUUAUGAAAUGGAGGCU	1	0	9	0	2 cited is not ma	Yes	fn-111	mb-01011	ax-1011011	ku-01	ss-111111101000
PID0607	Lin2016-hq	Rhsol	Rhi-milR-174		SRR1994871	8692379	5.29199	46	39	0.847826	UUUAAGGAUUAUGAAAUGGAGGC	CUGCAUAACAAGUCCAAAG	UUUAAGGAUUAUGAAAUGGAGGCU	1	0	10	0	2 cited is not ma	Yes	fn-111	mb-01011	ax-1011011	ku-01	ss-111111101000
PID0607	Lin2016-hq	Rhsol	Rhi-milR-174		SRR1994874	9302637	6.0198	56	54	0.964286	UUUAAGGAUUAUGAAAUGGAGGC	CUGCAUAACAAGUCCAAAG	UUUAAGGAUUAUGAAAUGGAGGCU	1	0	11	0	2 cited is not ma	Yes	fn-111	mb-01011	ax-1011011	ku-01	ss-111111101000
PID0607	Lin2016-hq	Rhsol	Rhi-milR-174		SRR1994877	6052857	13.3821	81	75	0.925926	UUUAAGGAUUAUGAAAUGGAGGC	CUGCAUAACAAGUCCAAAG	UUUAAGGAUUAUGAAAUGGAGGCU	1	0	21	0	2 cited is not ma	Yes	fn-111	mb-01011	ax-1011011	ku-01	ss-111111101000
PID0607	Lin2016-hq	Rhsol	Rhi-milR-174		SRR1994875	4270606	1.40495	6	4	0.666667	UUUAAGGAUUAUGAAAUGGAGGC	CUGCAUAACAAGUCCAAAG	UUUAAGGAUUAUGAAAUGGAGGCU	0	0	1	0	3 cited not expressed	No	fn-001	mb-01011	ax-1011011	ku-01	ss-110110101000
PID0608	Lin2016-hq	Rhsol	Rhi-milR-98		SRR1994876	6833927	1.31696	9	9	1	UGGGACUUUAGUAGUUACUGGGC	AAGCUAUGUAAGUACAACA	UAAGGGCAAUGGCAAGCUAUGUA	0	0	3	0	3 cited not expressed	No	fn-011	mb-00111	ax-1001011	ku-01	ss-111111101000
PID0608	Lin2016-hq	Rhsol	Rhi-milR-98		SRR1994875	4270606	0.468318	2	2	1	UAAGGGCAAUGGCAAGCUAUGUA	AGUAGUUACUGGGCUUAAGGCCCUUGUACA	UAAGGGCAAUGGCAAGCUAUGUA	0	0	0	0	3 cited not expressed	No	fn-011	mb-01011	ax-1001011	ku-01	ss-110111101000
PID0608	Lin2016-hq	Rhsol	Rhi-milR-98		SRR1994871	8692379	4.14156	36	31	0.861111	UGCUUAAUGCAGUGUGGACUGGUG	AGUAGUUACUGGGCUUAAGGCCCUUGUACA	UAAGGGCAAUGGCAAGCUAUGUA	0	0	3	0	3 cited not expressed	No	fn-011	mb-00010	ax-1001011	ku-01	ss-111111101000
PID0608	Lin2016-hq	Rhsol	Rhi-milR-98		SRR1994873	8626632	0.5796	5	4	0.8	UGCUUAAUGCAGUGUGGACUGGU	AGUAGUUACUGGGCUUAAGGCCCUUGUACA	UAAGGGCAAUGGCAAGCUAUGUA	0	0	1	0	3 cited not expressed	No	fn-001	mb-00010	ax-1001011	ku-01	ss-100110101010
PID0608	Lin2016-hq	Rhsol	Rhi-milR-98		SRR1994874	9302637	0.429986	4	4	1	AGGGCAAUGGCAAGCUAUGUAAGUA	CUUUAGUAGUUACUGGGCUUAAGGCCCUUGUA	UAAGGGCAAUGGCAAGCUAUGUA	0	0	1	0	3 cited not expressed	No	fn-011	mb-00111	ax-1001001	ku-01	ss-100011101000
PID0608	Lin2016-hq	Rhsol	Rhi-milR-98		SRR1994877	6052857	0.495634	3	2	0.666667	UGCUUAAUGCAGUGUGGACUGG	AGUAGUUACUGGGCUUAAGGCCCUUGUACA	UAAGGGCAAUGGCAAGCUAUGUA	0	0	1	0	3 cited not expressed	No	fn-001	mb-00010	ax-1001011	ku-01	ss-110110101000
PID0608	Lin2016-hq	Rhsol	Rhi-milR-98		SRR1994872	9065193	0.55156	5	4	0.8	UUAAGGCCCUUGUACAGUGUGGG		UAAGGGCAAUGGCAAGCUAUGUA	0	0	1	0	3 cited not expressed	No	fn-001	mb-00110	ax-0001010	ku-01	ss-110110101000
PID0611	Lin2016-hq	Rhsol	Rhi-milR-5		SRR1994876	6833927	0.877973	6	0	0	AAGGAAUGGGUUGAAUGCUGCC	CAGCAAAGGACCCUAGAACUCCUCAG	AAGGAAUGGGUUGAAUGCUGCC	0	0	0	0	3 cited not expressed	No	fn-001	mb-01011	ax-1001011	ku-01	ss-110111001000
PID0611	Lin2016-hq	Rhsol	Rhi-milR-5		SRR1994875	4270606	0.468318	2	0	0	AAGGAAUGGGUUGAAUGCUGCC	CAGCAAAGGACCCUAGAACUCCUCAG	AAGGAAUGGGUUGAAUGCUGCC	0	0	0	0	3 cited not expressed	No	fn-001	mb-01011	ax-1001011	ku-01	ss-110111001000
PID0611	Lin2016-hq	Rhsol	Rhi-milR-5		SRR1994877	6052857	0.330422	2	1	0.5	CUAAGGAAUGGGUUGAAUGCUGC	AGCAAAGGACCCUAGAACUCCUCAGCC	AAGGAAUGGGUUGAAUGCUGCC	0	0	1	0	3 cited not expressed	No	fn-001	mb-01011	ax-1001011	ku-01	ss-110110101000
PID0611	Lin2016-hq	Rhsol	Rhi-milR-5		SRR1994873	8626632	0.5796	5	3	0.6	CCAGCAAAGGACCCUAGAACUC	AUGGGUUGAAUGCUGCCC	AAGGAAUGGGUUGAAUGCUGCC	0	0	2	0	3 cited not expressed	No	fn-001	mb-00010	ax-1001011	ku-01	ss-111110101000
PID0611	Lin2016-hq	Rhsol	Rhi-milR-5		SRR1994871	8692379	0.69026	6	2	0.333333	AAGUUGUCAGCUAAGGAAUGGGU	CCUAGAACUCCUCAGCCGCAACUAUUGG	AAGGAAUGGGUUGAAUGCUGCC	0	0	1	0	3 cited not expressed	No	fn-001	mb-01011	ax-1001011	ku-01	ss-110110001000
PID0611	Lin2016-hq	Rhsol	Rhi-milR-5		SRR1994874	9302637	0.322489	3	1	0.333333	CAGCAAAGGACCCUAGAACUCCU	GAAUGGGUUGAAUGCUGCC	AAGGAAUGGGUUGAAUGCUGCC	0	0	1	0	3 cited not expressed	No	fn-001	mb-01011	ax-1001011	ku-01	ss-100110001000
PID0611	Lin2016-hq	Rhsol	Rhi-milR-5		SRR1994872	9065193	0.441248	4	1	0.25	UGGCCAGGUAUGAAGUUGUCAGC	CAGCAAAGGACCCUAGAACUCCUCAG	AAGGAAUGGGUUGAAUGCUGCC	0	0	1	0	3 cited not expressed	No	fn-001	mb-00010	ax-1001011	ku-01	ss-110110001000
PID0613	Lin2016-hq	Rhsol	Rhi-milR-140		SRR1994872	9065193	20.4077	185	180	0.972973	UGGCAUGUAGCAUACUGGGUAUG	UACUGGGUGUGCUGUGACCAC	UGGCAUGUAGCAUACUGGGU	1	0	67	0	2 cited is not ma	Yes	fn-111	mb-01011	ax-1011011	ku-01	ss-111111111110
PID0613	Lin2016-hq	Rhsol	Rhi-milR-140		SRR1994874	9302637	20.9618	195	193	0.989744	UGGCAUGUAGCAUACUGGGUAUG	UACUGGGUGUGCUGUGACCAC	UGGCAUGUAGCAUACUGGGU	0	0	60	0	3 cited not expressed	Yes	fn-111	mb-01111	ax-1011011	ku-01	ss-111111111100
PID0613	Lin2016-hq	Rhsol	Rhi-milR-140		SRR1994876	6833927	26.3392	180	177	0.983333	UGGCAUGUAGCAUACUGGGUAUG	UACUGGGUGUGCUGUGACCAC	UGGCAUGUAGCAUACUGGGU	0	0	27	0	3 cited not expressed	Yes	fn-111	mb-01011	ax-1011011	ku-01	ss-111111111100
PID0613	Lin2016-hq	Rhsol	Rhi-milR-140		SRR1994875	4270606	18.2644	78	77	0.987179	UGGCAUGUAGCAUACUGGGUAUG	UACUGGGUGUGCUGUGACCAC	UGGCAUGUAGCAUACUGGGU	0	0	21	0	3 cited not expressed	Yes	fn-111	mb-01011	ax-1011011	ku-01	ss-111111111100
PID0613	Lin2016-hq	Rhsol	Rhi-milR-140		SRR1994873	8626632	25.5024	220	209	0.95	UGGCAUGUAGCAUACUGGGUAUG	UACUGGGUGUGCUGUGACCAC	UGGCAUGUAGCAUACUGGGU	0	0	58	0	3 cited not expressed	Yes	fn-111	mb-01011	ax-1011011	ku-01	ss-111111111100
PID0613	Lin2016-hq	Rhsol	Rhi-milR-140		SRR1994871	8692379	57.4066	499	483	0.967936	UGGCAUGUAGCAUACUGGGUAUG	UACUGGGUGUGCUGUGACCAC	UGGCAUGUAGCAUACUGGGU	1	0	94	0	2 cited is not ma	Yes	fn-111	mb-01011	ax-1011011	ku-01	ss-111111111100
PID0613	Lin2016-hq	Rhsol	Rhi-milR-140		SRR1994877	6052857	28.2511	171	170	0.994152	UGGCAUGUAGCAUACUGGGUAUG	UACUGGGUGUGCUGUGACCAC	UGGCAUGUAGCAUACUGGGU	0	0	41	0	3 cited not expressed	Yes	fn-111	mb-01011	ax-1011011	ku-01	ss-111111111100
PID0614	Lin2016-hq	Rhsol	Rhi-milR-147		SRR1994875	4270606	1.63911	7	6	0.857143	UGGGCAUUUGUAGGUUGGUCUGC	AGAAAGGCCACAUGAUGUUGC	UGGGCAUUUGUAGGUUGGUCUGCA	1	0	2	0	2 cited is not ma	Yes	fn-111	mb-01111	ax-1011011	ku-01	ss-111111111100
PID0614	Lin2016-hq	Rhsol	Rhi-milR-147		SRR1994873	8626632	2.55024	22	14	0.636364	UGGGCAUUUGUAGGUUGGUCUGCA	CAGAAAGGCCACAUGAUGUUGC	UGGGCAUUUGUAGGUUGGUCUGCA	3	0	3	0	1 cited is ma	No	fn-101	mb-01011	ax-1011011	ku-01	ss-111110111100
PID0614	Lin2016-hq	Rhsol	Rhi-milR-147		SRR1994872	9065193	3.30936	30	19	0.633333	UGGGCAUUUGUAGGUUGGUCUGCA	CAGAAAGGCCACAUGAUGUUGC	UGGGCAUUUGUAGGUUGGUCUGCA	5	0	5	0	1 cited is ma	No	fn-101	mb-01011	ax-1011011	ku-01	ss-101110111100
PID0614	Lin2016-hq	Rhsol	Rhi-milR-147		SRR1994874	9302637	3.0099	28	20	0.714286	UGGGCAUUUGUAGGUUGGUCUGCAG	GCAGAAAGGCCACAUGAUGUUGC	UGGGCAUUUGUAGGUUGGUCUGCA	4	0	5	0	2 cited is not ma	No	fn-101	mb-01011	ax-1011001	ku-01	ss-111010111100
PID0614	Lin2016-hq	Rhsol	Rhi-milR-147		SRR1994876	6833927	2.19493	15	12	0.8	UGGGCAUUUGUAGGUUGGUCUGCAG	GCAGAAAGGCCACAUGAUGUUGC	UGGGCAUUUGUAGGUUGGUCUGCA	3	0	4	0	2 cited is not ma	No	fn-101	mb-01011	ax-1011001	ku-01	ss-101010111100
PID0614	Lin2016-hq	Rhsol	Rhi-milR-147		SRR1994871	8692379	2.76104	24	14	0.583333	UAGGUUGGUCUGCAGAUAC	AACCUGCAGAAAGGCCACA	UGGGCAUUUGUAGGUUGGUCUGCA	0	0	3	0	3 cited not expressed	No	fn-001	mb-01011	ax-1011001	ku-01	ss-101010111100
PID0614	Lin2016-hq	Rhsol	Rhi-milR-147		SRR1994877	6052857	2.14775	13	10	0.769231	UGGGCAUUUGUAGGUUGGUCUGCAG	GCAGAAAGGCCACAUGAUGUUGC	UGGGCAUUUGUAGGUUGGUCUGCA	0	0	3	0	3 cited not expressed	No	fn-001	mb-01011	ax-1011001	ku-01	ss-101010111100
PID0615	Lin2016-hq	Rhsol	Rhi-milR-25		SRR1994872	9065193	6.61872	60	60	1	AGGACCUACGGCUACUUCUGGAGC	UCCAGAAUGGCCUCGCUCCUC	AGGACCUACGGCUACUUCUGGAG	4	0	14	1	2 cited is not ma	Yes	fn-111	mb-01111	ax-1101011	ku-01	ss-101111101111
PID0615	Lin2016-hq	Rhsol	Rhi-milR-25		SRR1994873	8626632	1.1592	10	10	1	AGGACCUACGGCUACUUCUGGAGC	UCCAGAAUGGCCUCGCUCCUC	AGGACCUACGGCUACUUCUGGAG	1	0	3	0	2 cited is not ma	Yes	fn-111	mb-01011	ax-1001011	ku-01	ss-101111101110
PID0615	Lin2016-hq	Rhsol	Rhi-milR-25		SRR1994874	9302637	0.967468	9	9	1	AGGACCUACGGCUACUUCUGGAG	CCAGAAUGGCCUCGCUCCUC	AGGACCUACGGCUACUUCUGGAG	2	0	2	0	1 cited is ma	Yes	fn-111	mb-01011	ax-1001011	ku-01	ss-101111101110
PID0615	Lin2016-hq	Rhsol	Rhi-milR-25		SRR1994876	6833927	0.585315	4	4	1	AGGACCUACGGCUACUUCUGGAG	CCAGAAUGGCCUCGCUCCUC	AGGACCUACGGCUACUUCUGGAG	1	0	1	0	1 cited is ma	No	fn-011	mb-01011	ax-1001011	ku-01	ss-100111101100
PID0615	Lin2016-hq	Rhsol	Rhi-milR-25		SRR1994877	6052857	0.495634	3	3	1	AGGACCUACGGCUACUUCUGGAG	CCAGAAUGGCCUCGCUCCUC	AGGACCUACGGCUACUUCUGGAG	1	0	1	0	1 cited is ma	No	fn-011	mb-01011	ax-1001011	ku-01	ss-100111101100
PID0615	Lin2016-hq	Rhsol	Rhi-milR-25		SRR1994875	4270606	0.468318	2	2	1	GGACCUACGGCUACUUCUGG	AGAAUGGCCUCGCUCCU	AGGACCUACGGCUACUUCUGGAG	0	0	1	0	3 cited not expressed	No	fn-011	mb-01011	ax-1011011	ku-01	ss-100111101100
PID0615	Lin2016-hq	Rhsol	Rhi-milR-25		SRR1994871	8692379	0.230087	2	2	1	AAGGACCUACGGCUACUUCUGG	AGAAUGGCCUCGCUCCUCG	AGGACCUACGGCUACUUCUGGAG	0	0	1	0	3 cited not expressed	No	fn-011	mb-01011	ax-1001011	ku-01	ss-100111101000
PID0616	Lin2016-hq	Rhsol	Rhi-milR-44		SRR1994875	4270606	1.63911	7	7	1	CAGGACAGGUAGUAUUGGGAGGCA	UAUCAAGGUAUGCUUUUCCUGGG	CAGGACAGGUAGUAUUGGGAGGC	1	0	2	0	2 cited is not ma	Yes	fn-111	mb-00111	ax-1001011	ku-01	ss-111111101010
PID0616	Lin2016-hq	Rhsol	Rhi-milR-44		SRR1994873	8626632	1.39104	12	11	0.916667	CAGGACAGGUAGUAUUGGGAGGCA	UAUCAAGGUAUGCUUUUCCUGGG	CAGGACAGGUAGUAUUGGGAGGC	3	0	4	0	2 cited is not ma	Yes	fn-111	mb-00011	ax-1001011	ku-01	ss-111111101010
PID0616	Lin2016-hq	Rhsol	Rhi-milR-44		SRR1994874	9302637	1.71994	16	16	1	CAGGACAGGUAGUAUUGGGAGGCA	UAUCAAGGUAUGCUUUUCCUGGG	CAGGACAGGUAGUAUUGGGAGGC	2	0	3	0	2 cited is not ma	Yes	fn-111	mb-00011	ax-1001011	ku-01	ss-111111101010
PID0616	Lin2016-hq	Rhsol	Rhi-milR-44		SRR1994872	9065193	0.55156	5	5	1	CAGGACAGGUAGUAUUGGGAGGCA	UAUCAAGGUAUGCUUUUCCUGGG	CAGGACAGGUAGUAUUGGGAGGC	0	0	2	0	3 cited not expressed	No	fn-011	mb-00011	ax-1001011	ku-01	ss-111111101000
PID0616	Lin2016-hq	Rhsol	Rhi-milR-44		SRR1994876	6833927	2.92658	20	19	0.95	CAGGACAGGUAGUAUUGGGAGGCA	UAUCAAGGUAUGCUUUUCCUGGG	CAGGACAGGUAGUAUUGGGAGGC	2	0	3	0	2 cited is not ma	Yes	fn-111	mb-00011	ax-1001011	ku-01	ss-111111101000
PID0616	Lin2016-hq	Rhsol	Rhi-milR-44		SRR1994877	6052857	2.64338	16	14	0.875	CAGGACAGGUAGUAUUGGGAGGCA	UAUCAAGGUAUGCUUUUCCUGGG	CAGGACAGGUAGUAUUGGGAGGC	1	0	5	0	2 cited is not ma	Yes	fn-111	mb-00011	ax-1001011	ku-01	ss-111111101000
PID0616	Lin2016-hq	Rhsol	Rhi-milR-44		SRR1994871	8692379	6.32738	55	53	0.963636	AGGACAGGUAGUAUUGGGAGGCAG	AUAUCAAGGUAUGCUUUUCCUGG	CAGGACAGGUAGUAUUGGGAGGC	0	0	13	0	3 cited not expressed	Yes	fn-111	mb-00111	ax-1001011	ku-01	ss-111111101000
PID0617	Lin2016-hq	Rhsol	Rhi-milR-119		SRR1994872	9065193	5.62591	51	48	0.941176	UCAUUCAAGGGAGCGGAACAAAAC	UAUCAUCCGUUCCUUUGAGUACU	UCAUUCAAGGGAGCGGAACAA	0	0	30	0	3 cited not expressed	Yes	fn-111	mb-01111	ax-1001011	ku-01	ss-111111101110
PID0617	Lin2016-hq	Rhsol	Rhi-milR-119		SRR1994876	6833927	4.82885	33	30	0.909091	UCAUUCAAGGGAGCGGAACAAAAC	UAUCAUCCGUUCCUUUGAGUACU	UCAUUCAAGGGAGCGGAACAA	0	0	14	0	3 cited not expressed	Yes	fn-111	mb-01111	ax-1001011	ku-01	ss-111111101110
PID0617	Lin2016-hq	Rhsol	Rhi-milR-119		SRR1994874	9302637	5.05233	47	41	0.87234	UCAUUCAAGGGAGCGGAACAAAAC	UAUCAUCCGUUCCUUUGAGUACU	UCAUUCAAGGGAGCGGAACAA	1	0	23	0	2 cited is not ma	Yes	fn-111	mb-01111	ax-1001011	ku-01	ss-111111101110
PID0617	Lin2016-hq	Rhsol	Rhi-milR-119		SRR1994873	8626632	6.60745	57	50	0.877193	UCAUUCAAGGGAGCGGAACAAAAC	UAUCAUCCGUUCCUUUGAGUACU	UCAUUCAAGGGAGCGGAACAA	0	0	28	0	3 cited not expressed	Yes	fn-111	mb-01011	ax-1001011	ku-01	ss-111111101110
PID0617	Lin2016-hq	Rhsol	Rhi-milR-119		SRR1994877	6052857	17.5124	106	98	0.924528	UCAUUCAAGGGAGCGGAACAAAAC	UAUCAUCCGUUCCUUUGAGUACU	UCAUUCAAGGGAGCGGAACAA	2	0	52	0	2 cited is not ma	Yes	fn-111	mb-01011	ax-1001011	ku-01	ss-111111101110
PID0617	Lin2016-hq	Rhsol	Rhi-milR-119		SRR1994871	8692379	4.48669	39	33	0.846154	UCAUUCAAGGGAGCGGAACAAAAC	UAUCAUCCGUUCCUUUGAGUACU	UCAUUCAAGGGAGCGGAACAA	0	0	15	0	3 cited not expressed	Yes	fn-111	mb-01011	ax-1001011	ku-01	ss-111111101100
PID0617	Lin2016-hq	Rhsol	Rhi-milR-119		SRR1994875	4270606	5.15149	22	16	0.727273	UCAUUCAAGGGAGCGGAACAAAAC	UAUCAUCCGUUCCUUUGAGUACU	UCAUUCAAGGGAGCGGAACAA	0	0	5	0	3 cited not expressed	No	fn-101	mb-01011	ax-1001011	ku-01	ss-111110101100
PID0619	Lin2016-hq	Rhsol	Rhi-milR-41		SRR1994873	8626632	3.70944	32	32	1	CCGAGAAGGCUGCUCUGUACU	UGCACCGUCGCUUUCUUGGCC	CACCGAGAAGGCUGCUCUGUACUA	2	0	8	0	2 cited is not ma	Yes	fn-111	mb-01011	ax-1011011	ku-01	ss-101111111100
PID0619	Lin2016-hq	Rhsol	Rhi-milR-41		SRR1994872	9065193	2.7578	25	25	1	CACCGAGAAGGCUGCUCUGUACU	UGCACCGUCGCUUUCUUGGCCAU	CACCGAGAAGGCUGCUCUGUACUA	1	0	6	0	2 cited is not ma	Yes	fn-111	mb-01011	ax-1001011	ku-01	ss-101111101100
PID0619	Lin2016-hq	Rhsol	Rhi-milR-41		SRR1994874	9302637	1.82744	17	17	1	CACCGAGAAGGCUGCUCUGUACUAC	GUGCACCGUCGCUUUCUUGGCCAU	CACCGAGAAGGCUGCUCUGUACUA	0	0	3	0	3 cited not expressed	Yes	fn-111	mb-01011	ax-1001001	ku-01	ss-101011101110
PID0619	Lin2016-hq	Rhsol	Rhi-milR-41		SRR1994877	6052857	0.330422	2	2	1	GUGCACCGUCGCUUUCUUGGC	CGAGAAGGCUGCUCUGUACUAC	CACCGAGAAGGCUGCUCUGUACUA	0	0	1	0	3 cited not expressed	No	fn-011	mb-01011	ax-1011011	ku-01	ss-110111111100
PID0619	Lin2016-hq	Rhsol	Rhi-milR-41		SRR1994871	8692379	0.34513	3	3	1	ACCGAGAAGGCUGCUCUGUACUACG	AGUGCACCGUCGCUUUCUUGGCCA	CACCGAGAAGGCUGCUCUGUACUA	0	0	1	0	3 cited not expressed	No	fn-011	mb-01011	ax-1001001	ku-01	ss-100011101110
PID0619	Lin2016-hq	Rhsol	Rhi-milR-41		SRR1994876	6833927	0.585315	4	4	1	CUCACCGAGAAGGCUGCUCUGUACUACG	AGUGCACCGUCGCUUUCUUGGCCAUGC	CACCGAGAAGGCUGCUCUGUACUA	0	0	1	0	3 cited not expressed	No	fn-011	mb-01011	ax-1001001	ku-01	ss-100011101100
PID0619	Lin2016-hq	Rhsol	Rhi-milR-41		SRR1994875	4270606	0	0	0	NA	CACCGAGAAGGCUGCUCUGUACUA	GUGCACCGUCGCUUUCUUGGCCAU	CACCGAGAAGGCUGCUCUGUACUA	0	0	0	0	4 locus not expressed	No	fn-001	mb-01011	ax-1001011	ku-01	ss-000110001100
PID0620	Lin2016-hq	Rhsol	Rhi-milR-133		SRR1994877	6052857	9.41704	57	52	0.912281	UGAUGUAUUGAAUGCUCUGGGACAC	AUCUUAGUGGUGUUCAAUGUACAGGG	UGAUGUAUUGAAUGCUCUGGGACA	2	0	18	0	2 cited is not ma	Yes	fn-111	mb-01011	ax-1001001	ku-01	ss-101011101000
PID0620	Lin2016-hq	Rhsol	Rhi-milR-133		SRR1994871	8692379	6.0973	53	46	0.867925	UGAUGUAUUGAAUGCUCUGGGACAC	AUCUUAGUGGUGUUCAAUGUACAGGG	UGAUGUAUUGAAUGCUCUGGGACA	1	0	11	0	2 cited is not ma	Yes	fn-111	mb-01011	ax-1001001	ku-01	ss-101011101000
PID0620	Lin2016-hq	Rhsol	Rhi-milR-133		SRR1994872	9065193	2.42687	22	17	0.772727	UGAUGUAUUGAAUGCUCUGGGACAC	AUCUUAGUGGUGUUCAAUGUACAGGG	UGAUGUAUUGAAUGCUCUGGGACA	0	0	7	0	3 cited not expressed	No	fn-101	mb-01011	ax-1001001	ku-01	ss-101010101000
PID0620	Lin2016-hq	Rhsol	Rhi-milR-133		SRR1994875	4270606	4.44902	19	15	0.789474	UGAUGUAUUGAAUGCUCUGGGACAC	AUCUUAGUGGUGUUCAAUGUACAGGG	UGAUGUAUUGAAUGCUCUGGGACA	1	0	6	0	2 cited is not ma	No	fn-101	mb-01011	ax-1001001	ku-01	ss-101010101000
PID0620	Lin2016-hq	Rhsol	Rhi-milR-133		SRR1994873	8626632	3.94128	34	25	0.735294	UGAUGUAUUGAAUGCUCUGGGACAC	AUCUUAGUGGUGUUCAAUGUACAGGG	UGAUGUAUUGAAUGCUCUGGGACA	4	0	10	0	2 cited is not ma	No	fn-101	mb-01011	ax-1001001	ku-01	ss-101010101000
PID0620	Lin2016-hq	Rhsol	Rhi-milR-133		SRR1994874	9302637	3.22489	30	26	0.866667	UGUAUUGAAUGCUCUGGGACAC	AUCUUAGUGGUGUUCAAUGUACA	UGAUGUAUUGAAUGCUCUGGGACA	2	0	6	0	2 cited is not ma	Yes	fn-111	mb-01111	ax-1011011	ku-01	ss-111111101000
PID0620	Lin2016-hq	Rhsol	Rhi-milR-133		SRR1994876	6833927	3.80455	26	20	0.769231	UGUAUUGAAUGCUCUGGGACAC	AUCUUAGUGGUGUUCAAUGUACA	UGAUGUAUUGAAUGCUCUGGGACA	0	0	7	0	3 cited not expressed	No	fn-101	mb-01011	ax-1011011	ku-01	ss-111110101000
PID0621	Lin2016-hq	Rhsol	Rhi-milR-75		SRR1994877	6052857	7.10408	43	43	1	GCGGACGGAGCUUAUGAUGGGAGCA	UUCCGCGUCGGAGGAGCGAGUUGGCUG	GCGGACGGAGCUUAUGAUGGGAG	0	0	17	0	3 cited not expressed	Yes	fn-111	mb-01111	ax-1001001	ku-01	ss-101011101110
PID0621	Lin2016-hq	Rhsol	Rhi-milR-75		SRR1994876	6833927	11.999	82	81	0.987805	GCGGACGGAGCUUAUGAUGGGAGCA	UUCCGCGUCGGAGGAGCGAGUUGGCUG	GCGGACGGAGCUUAUGAUGGGAG	0	0	15	0	3 cited not expressed	Yes	fn-111	mb-01011	ax-1001001	ku-01	ss-101011101110
PID0621	Lin2016-hq	Rhsol	Rhi-milR-75		SRR1994872	9065193	50.0817	454	454	1	GCGGACGGAGCUUAUGAUGGGAGCA	UUCCGCGUCGGAGGAGCGAGUUGGCUG	GCGGACGGAGCUUAUGAUGGGAG	6	0	91	0	2 cited is not ma	Yes	fn-111	mb-01011	ax-1001001	ku-01	ss-101011101100
PID0621	Lin2016-hq	Rhsol	Rhi-milR-75		SRR1994873	8626632	76.3913	659	659	1	GCGGACGGAGCUUAUGAUGGGAGCA	UUCCGCGUCGGAGGAGCGAGUUGGCUG	GCGGACGGAGCUUAUGAUGGGAG	4	0	90	0	2 cited is not ma	Yes	fn-111	mb-01011	ax-1001001	ku-01	ss-101011101100
PID0621	Lin2016-hq	Rhsol	Rhi-milR-75		SRR1994874	9302637	8.27722	77	77	1	GCGGACGGAGCUUAUGAUGGGAGCA	UUCCGCGUCGGAGGAGCGAGUUGGCUG	GCGGACGGAGCUUAUGAUGGGAG	0	0	8	0	3 cited not expressed	Yes	fn-111	mb-01011	ax-1001001	ku-01	ss-101011101100
PID0621	Lin2016-hq	Rhsol	Rhi-milR-75		SRR1994875	4270606	5.61981	24	24	1	UGCGGACGGAGCUUAUGAUGGGAGCA	UUCCGCGUCGGAGGAGCGAGUUGGCUGG	GCGGACGGAGCUUAUGAUGGGAG	0	0	4	0	3 cited not expressed	Yes	fn-111	mb-01111	ax-1001001	ku-01	ss-101011101100
PID0621	Lin2016-hq	Rhsol	Rhi-milR-75		SRR1994871	8692379	0.575217	5	5	1	GCAAGGUUUCCGCGUCGGAGG	CCGCGUCGGAGGAGCGAGUUGGCUG	GCGGACGGAGCUUAUGAUGGGAG	0	0	1	0	3 cited not expressed	No	fn-011	mb-00010	ax-1001011	ku-01	ss-110111101100
PID0622	Lin2016-hq	Rhsol	Rhi-milR-91		SRR1994877	6052857	3292.33	19928	19923	0.999749	GUCUGGAAGUUGGCGCAAGC	UUGUGCUGCCUUCCUUUUUU	GUCUGGAAGUUGGCGCAAGCAUUA	392	0	6693	0	2 cited is not ma	Yes	fn-111	mb-01011	ax-1011011	ku-11	ss-101111101110
PID0622	Lin2016-hq	Rhsol	Rhi-milR-91		SRR1994876	6833927	943.235	6446	6440	0.999069	GUCUGGAAGUUGGCGCAAGC	UUGUGCUGCCUUCCUUUUUU	GUCUGGAAGUUGGCGCAAGCAUUA	147	0	1642	0	2 cited is not ma	Yes	fn-111	mb-01011	ax-1011011	ku-11	ss-101111101100
PID0622	Lin2016-hq	Rhsol	Rhi-milR-91		SRR1994875	4270606	2096.89	8955	8953	0.999777	GUCUGGAAGUUGGCGCAAGC	UUGUGCUGCCUUCCUUUUUU	GUCUGGAAGUUGGCGCAAGCAUUA	207	0	1676	0	2 cited is not ma	Yes	fn-111	mb-01011	ax-1011011	ku-11	ss-101111101100
PID0622	Lin2016-hq	Rhsol	Rhi-milR-91		SRR1994873	8626632	7273.64	62747	62736	0.999825	GUCUGGAAGUUGGCGCAAGC	UUGUGCUGCCUUCCUUUUUU	GUCUGGAAGUUGGCGCAAGCAUUA	2609	0	15451	0	2 cited is not ma	Yes	fn-111	mb-01011	ax-1011011	ku-11	ss-101111101100
PID0622	Lin2016-hq	Rhsol	Rhi-milR-91		SRR1994874	9302637	2412	22438	22435	0.999866	GUCUGGAAGUUGGCGCAAGC	UUGUGCUGCCUUCCUUUUUU	GUCUGGAAGUUGGCGCAAGCAUUA	1028	0	5047	0	2 cited is not ma	Yes	fn-111	mb-01011	ax-1011011	ku-11	ss-101111101100
PID0622	Lin2016-hq	Rhsol	Rhi-milR-91		SRR1994872	9065193	9586.12	86900	86899	0.999988	GUCUGGAAGUUGGCGCAAGCAUUAG	GGUGCUUGUGCUGCCUUCCUUUUUU	GUCUGGAAGUUGGCGCAAGCAUUA	6939	0	23923	0	2 cited is not ma	Yes	fn-111	mb-01011	ax-1001001	ku-11	ss-101011101100
PID0622	Lin2016-hq	Rhsol	Rhi-milR-91		SRR1994871	8692379	2494.48	21683	21681	0.999908	GUCUGGAAGUUGGCGCAAGCAUUAG	GGUGCUUGUGCUGCCUUCCUUUUUU	GUCUGGAAGUUGGCGCAAGCAUUA	448	0	6294	0	2 cited is not ma	Yes	fn-111	mb-01011	ax-1001001	ku-11	ss-101011101100
PID0623	Lin2016-hq	Rhsol	Rhi-milR-86		SRR1994872	9065193	12.1343	110	110	1	CGUAAACACUUGAACUUGGCGGAUA	UCCGCGCAUUGCUCGCGUUGUUUACUGUG	GUAAACACUUGAACUUGGCGGA	0	0	16	0	3 cited not expressed	Yes	fn-111	mb-01111	ax-1011001	ku-01	ss-101011111000
PID0623	Lin2016-hq	Rhsol	Rhi-milR-86		SRR1994876	6833927	5.12151	35	35	1	CGUAAACACUUGAACUUGGCGGAUA	UCCGCGCAUUGCUCGCGUUGUUUACUGUG	GUAAACACUUGAACUUGGCGGA	2	0	4	0	2 cited is not ma	Yes	fn-111	mb-01011	ax-1011001	ku-01	ss-101011111000
PID0623	Lin2016-hq	Rhsol	Rhi-milR-86		SRR1994873	8626632	4.98456	43	43	1	CGUAAACACUUGAACUUGGCGGAUA	UCCGCGCAUUGCUCGCGUUGUUUACUGUG	GUAAACACUUGAACUUGGCGGA	0	0	4	0	3 cited not expressed	Yes	fn-111	mb-01011	ax-1011001	ku-01	ss-101011111000
PID0623	Lin2016-hq	Rhsol	Rhi-milR-86		SRR1994875	4270606	3.51238	15	15	1	GUAAACACUUGAACUUGGCGGAU	CCGCGCAUUGCUCGCGUUGUUUACUGU	GUAAACACUUGAACUUGGCGGA	2	0	3	0	2 cited is not ma	Yes	fn-111	mb-01111	ax-1011011	ku-01	ss-101111111010
PID0623	Lin2016-hq	Rhsol	Rhi-milR-86		SRR1994874	9302637	2.9024	27	27	1	CGUAAACACUUGAACUUGGCGGA	CGCGCAUUGCUCGCGUUGUUUACUGUG	GUAAACACUUGAACUUGGCGGA	0	0	3	0	3 cited not expressed	Yes	fn-111	mb-01011	ax-1011011	ku-01	ss-101111111000
PID0623	Lin2016-hq	Rhsol	Rhi-milR-86		SRR1994877	6052857	2.64338	16	16	1	CGUAAACACUUGAACUUGGCGG	GCGCAUUGCUCGCGUUGUUUACUGUG	GUAAACACUUGAACUUGGCGGA	0	0	2	0	3 cited not expressed	Yes	fn-111	mb-01011	ax-1011011	ku-01	ss-101111111000
PID0623	Lin2016-hq	Rhsol	Rhi-milR-86		SRR1994871	8692379	4.14156	36	36	1	CGUAAACACUUGAACUUGGCGGAUAUA	UGUCCGCGCAUUGCUCGCGUUGUUUACUGUG	GUAAACACUUGAACUUGGCGGA	0	0	4	0	3 cited not expressed	Yes	fn-111	mb-01011	ax-1011001	ku-01	ss-101011101000
PID0624	Lin2016-hq	Rhsol	Rhi-milR-50		SRR1994877	6052857	0.826056	5	5	1	CCAAGUCGCUACGUACCAAGGC	AUUGGUUGGGGCAAGAACAGUGGC	CCAAGUCGCUACGUACCAAGG	0	0	3	0	3 cited not expressed	Yes	fn-111	mb-01111	ax-1001111	ku-01	ss-111111101110
PID0624	Lin2016-hq	Rhsol	Rhi-milR-50		SRR1994876	6833927	3.36556	23	22	0.956522	CCAAGUCGCUACGUACCAAGGC	AUUGGUUGGGGCAAGAACAGUGGC	CCAAGUCGCUACGUACCAAGG	0	0	7	0	3 cited not expressed	Yes	fn-111	mb-01111	ax-1001011	ku-01	ss-101111101100
PID0624	Lin2016-hq	Rhsol	Rhi-milR-50		SRR1994874	9302637	4.29986	40	40	1	CCAAGUCGCUACGUACCAAGGC	AUUGGUUGGGGCAAGAACAGUGGC	CCAAGUCGCUACGUACCAAGG	0	0	4	0	3 cited not expressed	Yes	fn-111	mb-01011	ax-1001011	ku-01	ss-101111101100
PID0624	Lin2016-hq	Rhsol	Rhi-milR-50		SRR1994872	9065193	8.05278	73	73	1	CCAAGUCGCUACGUACCAAGGCAU	AGAUUGGUUGGGGCAAGAACAGUGGC	CCAAGUCGCUACGUACCAAGG	0	0	10	0	3 cited not expressed	Yes	fn-111	mb-01010	ax-1001011	ku-01	ss-101111101100
PID0624	Lin2016-hq	Rhsol	Rhi-milR-50		SRR1994873	8626632	6.60745	57	56	0.982456	ACCAAGUCGCUACGUACCAAGGCAUG	UUGGUUGGGGCAAGAACAGUGGC	CCAAGUCGCUACGUACCAAGG	1	0	5	0	2 cited is not ma	Yes	fn-111	mb-00011	ax-1001001	ku-01	ss-101011101100
PID0624	Lin2016-hq	Rhsol	Rhi-milR-50		SRR1994871	8692379	2.41591	21	20	0.952381	ACCAAGUCGCUACGUACCAAGGC	UUGGUUGGGGCAAGAACAGUGGC	CCAAGUCGCUACGUACCAAGG	0	0	2	0	3 cited not expressed	No	fn-011	mb-01011	ax-1001011	ku-01	ss-101111101100
PID0624	Lin2016-hq	Rhsol	Rhi-milR-50		SRR1994875	4270606	3.27822	14	14	1	CUACCAAGUCGCUACGUACCAAGGC	UUGGUUGGGGCAAGAACAGUGGC	CCAAGUCGCUACGUACCAAGG	0	0	2	0	3 cited not expressed	No	fn-011	mb-00011	ax-1001001	ku-01	ss-101011101100
PID0625	Lin2016-hq	Rhsol	Rhi-milR-17		SRR1994876	6833927	5.26784	36	33	0.916667	AGACUAAGGCUCAGAUAAUUGCGC	UUUUGCAACCUGAGACCCAGGUUUCU	AGACUAAGGCUCAGAUAAUUGCG	2	0	13	0	2 cited is not ma	Yes	fn-111	mb-00111	ax-1001011	ku-01	ss-111111101100
PID0625	Lin2016-hq	Rhsol	Rhi-milR-17		SRR1994872	9065193	3.52999	32	24	0.75	AGACUAAGGCUCAGAUAAUUGCGC	UUUUGCAACCUGAGACCCAGGUUUCU	AGACUAAGGCUCAGAUAAUUGCG	1	0	8	0	2 cited is not ma	No	fn-101	mb-00111	ax-1001011	ku-01	ss-111110101100
PID0625	Lin2016-hq	Rhsol	Rhi-milR-17		SRR1994871	8692379	5.40704	47	42	0.893617	AGACUAAGGCUCAGAUAAUUGCGC	UUUUGCAACCUGAGACCCAGGUUUCU	AGACUAAGGCUCAGAUAAUUGCG	2	0	13	0	2 cited is not ma	Yes	fn-111	mb-00011	ax-1001011	ku-01	ss-111111101100
PID0625	Lin2016-hq	Rhsol	Rhi-milR-17		SRR1994874	9302637	4.72984	44	36	0.818182	AGACUAAGGCUCAGAUAAUUGCGC	UUUUGCAACCUGAGACCCAGGUUUCU	AGACUAAGGCUCAGAUAAUUGCG	0	0	5	0	3 cited not expressed	Yes	fn-111	mb-00011	ax-1001011	ku-01	ss-111111101100
PID0625	Lin2016-hq	Rhsol	Rhi-milR-17		SRR1994875	4270606	1.17079	5	3	0.6	AGACUAAGGCUCAGAUAAUUGCGC	UUUUGCAACCUGAGACCCAGGUUUCU	AGACUAAGGCUCAGAUAAUUGCG	0	0	2	0	3 cited not expressed	No	fn-001	mb-00011	ax-1001011	ku-01	ss-111110101100
PID0625	Lin2016-hq	Rhsol	Rhi-milR-17		SRR1994873	8626632	2.898	25	19	0.76	AGACUAAGGCUCAGAUAAUUGCGC	UUUUGCAACCUGAGACCCAGGUUUCU	AGACUAAGGCUCAGAUAAUUGCG	1	0	5	0	2 cited is not ma	No	fn-101	mb-00011	ax-1001011	ku-01	ss-111110101100
PID0625	Lin2016-hq	Rhsol	Rhi-milR-17		SRR1994877	6052857	7.76493	47	43	0.914894	AAGACUAAGGCUCAGAUAAUUGCGC	UUUUGCAACCUGAGACCCAGGUUUCUC	AGACUAAGGCUCAGAUAAUUGCG	2	0	10	0	2 cited is not ma	Yes	fn-111	mb-00010	ax-1001001	ku-01	ss-101011101110
PID0626	Lin2016-hq	Rhsol	Rhi-milR-106		SRR1994872	9065193	8.05278	73	31	0.424658	CUAGGAUUGAAAUGGUUGGACGCA	CAAACCUGACCUUCUCCUUUGA	UAGGAUUGAAAUGGUUGGACGC	2	0	3	0	2 cited is not ma	No	fn-101	mb-01011	ax-1001011	ku-01	ss-111110001100
PID0626	Lin2016-hq	Rhsol	Rhi-milR-106		SRR1994876	6833927	8.48707	58	28	0.482759	CUAGGAUUGAAAUGGUUGGACGC	AAACCUGACCUUCUCCUUUGA	UAGGAUUGAAAUGGUUGGACGC	1	0	4	0	2 cited is not ma	No	fn-101	mb-01011	ax-1001011	ku-01	ss-111110001100
PID0626	Lin2016-hq	Rhsol	Rhi-milR-106		SRR1994875	4270606	5.38565	23	10	0.434783	UCCUAGGAUUGAAAUGGUUGGACG	AACCUGACCUUCUCCUUUGAUG	UAGGAUUGAAAUGGUUGGACGC	0	0	1	0	3 cited not expressed	No	fn-001	mb-01111	ax-1001011	ku-01	ss-110110001100
PID0626	Lin2016-hq	Rhsol	Rhi-milR-106		SRR1994873	8626632	7.41889	64	23	0.359375	UAGGAUUGAAAUGGUUGGACGC	AAACCUGACCUUCUCCUUUG	UAGGAUUGAAAUGGUUGGACGC	5	0	5	0	1 cited is ma	No	fn-101	mb-01011	ax-1001011	ku-01	ss-111110001100
PID0626	Lin2016-hq	Rhsol	Rhi-milR-106		SRR1994871	8692379	8.74329	76	36	0.473684	UAGGAUUGAAAUGGUUGGACGCA	CAAACCUGACCUUCUCCUUUG	UAGGAUUGAAAUGGUUGGACGC	2	0	6	0	2 cited is not ma	No	fn-101	mb-01011	ax-1001011	ku-01	ss-111110001100
PID0626	Lin2016-hq	Rhsol	Rhi-milR-106		SRR1994874	9302637	7.63224	71	35	0.492958	UAGGAUUGAAAUGGUUGGACGC	AAACCUGACCUUCUCCUUUG	UAGGAUUGAAAUGGUUGGACGC	6	0	6	0	1 cited is ma	No	fn-101	mb-01011	ax-1001011	ku-01	ss-111110001100
PID0626	Lin2016-hq	Rhsol	Rhi-milR-106		SRR1994877	6052857	14.7038	89	33	0.370787	UAGGAUUGAAAUGGUUGGACGC	AAACCUGACCUUCUCCUUUG	UAGGAUUGAAAUGGUUGGACGC	7	0	7	0	1 cited is ma	No	fn-101	mb-01011	ax-1001011	ku-01	ss-111110001100
PID0627	Lin2016-hq	Rhsol	Rhi-milR-126		SRR1994873	8626632	2.66616	23	23	1	UGAGACAUUCUGUGCUAAGAUGG	CAUUUUUGUGCAGGAGGUUGAUGA	UGAGACAUUCUGUGCUAAGAUG	0	0	9	2	3 cited not expressed	Yes	fn-111	mb-01111	ax-1111011	ku-01	ss-111111111011
PID0627	Lin2016-hq	Rhsol	Rhi-milR-126		SRR1994876	6833927	2.48759	17	17	1	UGAGACAUUCUGUGCUAAGAUGG	CAUUUUUGUGCAGGAGGUUGAUGA	UGAGACAUUCUGUGCUAAGAUG	0	1	5	1	3 cited not expressed	Yes	fn-111	mb-01011	ax-1111011	ku-01	ss-111111111011
PID0627	Lin2016-hq	Rhsol	Rhi-milR-126		SRR1994872	9065193	2.42687	22	22	1	UGAGACAUUCUGUGCUAAGAUGG	CAUUUUUGUGCAGGAGGUUGAUGA	UGAGACAUUCUGUGCUAAGAUG	0	1	8	0	3 cited not expressed	Yes	fn-111	mb-01011	ax-1011011	ku-01	ss-111111111010
PID0627	Lin2016-hq	Rhsol	Rhi-milR-126		SRR1994875	4270606	1.87327	8	7	0.875	UGAGACAUUCUGUGCUAAGAUGG	CAUUUUUGUGCAGGAGGUUGAUGA	UGAGACAUUCUGUGCUAAGAUG	0	0	2	0	3 cited not expressed	Yes	fn-111	mb-01011	ax-1011011	ku-01	ss-111111111000
PID0627	Lin2016-hq	Rhsol	Rhi-milR-126		SRR1994874	9302637	2.14993	20	19	0.95	UGAGACAUUCUGUGCUAAGAUGG	CAUUUUUGUGCAGGAGGUUGAUGA	UGAGACAUUCUGUGCUAAGAUG	1	0	3	0	2 cited is not ma	Yes	fn-111	mb-01011	ax-1011011	ku-01	ss-101111111000
PID0627	Lin2016-hq	Rhsol	Rhi-milR-126		SRR1994871	8692379	2.07078	18	17	0.944444	AUUUUUGUGCAGGAGGUUGAUGAA	UUUUUGUGCAGGAGGUUGAUGA	UGAGACAUUCUGUGCUAAGAUG	0	0	2	0	3 cited not expressed	Yes	fn-111	mb-00111	ax-1011011	ku-01	ss-111111111000
PID0627	Lin2016-hq	Rhsol	Rhi-milR-126		SRR1994877	6052857	2.9738	18	17	0.944444	UGAGACAUUCUGUGCUAAGAUGGC	GCAUUUUUGUGCAGGAGGUUGAUGA	UGAGACAUUCUGUGCUAAGAUG	0	0	3	0	3 cited not expressed	Yes	fn-111	mb-01111	ax-1011011	ku-01	ss-101111111000
PID0629	Lin2016-hq	Rhsol	Rhi-milR-49		SRR1994875	4270606	0.234159	1	1	1	CAUUGAUUGGUUUGGCGUUGGACC	UUUAGUGCUGAACCAAUCAAUGUC	CAUUGAUUGGUUUGGCGUUGGACC	1	0	1	0	1 cited is ma	No	fn-011	mb-01011	ax-1011111	ku-01	ss-110111111110
PID0629	Lin2016-hq	Rhsol	Rhi-milR-49		SRR1994874	9302637	0.859971	8	8	1	CAUUGAUUGGUUUGGCGUUGGACC	UUUAGUGCUGAACCAAUCAAUGUC	CAUUGAUUGGUUUGGCGUUGGACC	3	0	3	0	1 cited is ma	No	fn-011	mb-01011	ax-1011011	ku-01	ss-111111111100
PID0629	Lin2016-hq	Rhsol	Rhi-milR-49		SRR1994872	9065193	0.992808	9	7	0.777778	CAUUGAUUGGUUUGGCGUUGGACC	UUUAGUGCUGAACCAAUCAAUGUC	CAUUGAUUGGUUUGGCGUUGGACC	4	0	4	0	1 cited is ma	No	fn-001	mb-01011	ax-1011011	ku-01	ss-111110111100
PID0629	Lin2016-hq	Rhsol	Rhi-milR-49		SRR1994876	6833927	0.438986	3	3	1	CACAUUGAUUGGUUUGGCGUUGG	AGUGCUGAACCAAUCAAUGUCA	CAUUGAUUGGUUUGGCGUUGGACC	0	0	1	0	3 cited not expressed	No	fn-011	mb-01011	ax-1011011	ku-01	ss-110111111100
PID0629	Lin2016-hq	Rhsol	Rhi-milR-49		SRR1994873	8626632	1.1592	10	9	0.9	UGGCGUUGGACCAAUCAAUGUA	CAUCAAUUGGUUUAGUGCUGAA	CAUUGAUUGGUUUGGCGUUGGACC	0	0	3	0	3 cited not expressed	No	fn-011	mb-01011	ax-1011011	ku-01	ss-101111111100
PID0629	Lin2016-hq	Rhsol	Rhi-milR-49		SRR1994877	6052857	0.330422	2	2	1	CAUUGAUUGGUUUGGCGUUGGACC	UUUAGUGCUGAACCAAUCAAUGUC	CAUUGAUUGGUUUGGCGUUGGACC	1	0	1	0	1 cited is ma	No	fn-011	mb-01011	ax-1011011	ku-01	ss-110111111100
PID0629	Lin2016-hq	Rhsol	Rhi-milR-49		SRR1994871	8692379	0	0	0	NA	CAUUGAUUGGUUUGGCGUUGGACC	UUUAGUGCUGAACCAAUCAAUGUC	CAUUGAUUGGUUUGGCGUUGGACC	0	0	0	0	4 locus not expressed	No	fn-001	mb-01011	ax-1011011	ku-01	ss-000110011100
PID0630	Lin2016-hq	Rhsol	Rhi-milR-13		SRR1994873	8626632	6.83929	59	38	0.644068	UAACUGAGACUUGCAUUGAUUGG	AAUCGAUGCAGGUCUCAGUUGCA	ACUGAGACUUGCAUUGAUUG	0	0	12	0	3 cited not expressed	No	fn-101	mb-01111	ax-1011011	ku-00	ss-111110111100
PID0630	Lin2016-hq	Rhsol	Rhi-milR-13		SRR1994874	9302637	6.23479	58	41	0.706897	UAACUGAGACUUGCAUUGAUUGG	AAUCGAUGCAGGUCUCAGUUGCA	ACUGAGACUUGCAUUGAUUG	0	0	18	0	3 cited not expressed	No	fn-101	mb-01111	ax-1011011	ku-00	ss-111110111100
PID0630	Lin2016-hq	Rhsol	Rhi-milR-13		SRR1994877	6052857	1.32169	8	5	0.625	UGAGACUUGCAUUGAUUGGUUGGA	CAAACCAAUCGAUGCAGGUCUCAGU	ACUGAGACUUGCAUUGAUUG	0	0	2	0	3 cited not expressed	No	fn-001	mb-01011	ax-1011011	ku-01	ss-111110111100
PID0630	Lin2016-hq	Rhsol	Rhi-milR-13		SRR1994872	9065193	7.61153	69	47	0.681159	UAACUGAGACUUGCAUUGAUUGG	AAUCGAUGCAGGUCUCAGUUGCA	ACUGAGACUUGCAUUGAUUG	0	0	26	0	3 cited not expressed	No	fn-101	mb-01011	ax-1011011	ku-00	ss-111110111100
PID0630	Lin2016-hq	Rhsol	Rhi-milR-13		SRR1994876	6833927	2.34126	16	11	0.6875	UAACUGAGACUUGCAUUGAUUGG	AAUCGAUGCAGGUCUCAGUUGCA	ACUGAGACUUGCAUUGAUUG	0	0	7	0	3 cited not expressed	No	fn-101	mb-01011	ax-1011011	ku-00	ss-111110111100
PID0630	Lin2016-hq	Rhsol	Rhi-milR-13		SRR1994875	4270606	1.87327	8	2	0.25	UAACUGAGACUUGCAUUGAUUGG	AAUCGAUGCAGGUCUCAGUUGCA	ACUGAGACUUGCAUUGAUUG	0	0	2	0	3 cited not expressed	No	fn-001	mb-01011	ax-1011011	ku-00	ss-111110011100
PID0630	Lin2016-hq	Rhsol	Rhi-milR-13		SRR1994871	8692379	0.230087	2	1	0.5	UAACUGAGACUUGCAUUGAUUGG	AAUCGAUGCAGGUCUCAGUUGCA	ACUGAGACUUGCAUUGAUUG	0	0	1	0	3 cited not expressed	No	fn-001	mb-01011	ax-1011011	ku-00	ss-100110111100
PID0631	Lin2016-hq	Rhsol	Rhi-milR-99		SRR1994874	9302637	11.6096	108	98	0.907407	UAAUAGGGACGUUGUAGACACAUC	UGCAAGUCUCAGUUACAUUGUUAAC	UAAUAGGGACGUUGUAGACACAUC	26	0	26	0	1 cited is ma	Yes	fn-111	mb-01011	ax-1001011	ku-01	ss-111111101100
PID0631	Lin2016-hq	Rhsol	Rhi-milR-99		SRR1994872	9065193	14.7818	134	116	0.865672	UAAUAGGGACGUUGUAGACACAUC	UGCAAGUCUCAGUUACAUUGUUAAC	UAAUAGGGACGUUGUAGACACAUC	40	0	40	0	1 cited is ma	Yes	fn-111	mb-01011	ax-1001011	ku-01	ss-111111101100
PID0631	Lin2016-hq	Rhsol	Rhi-milR-99		SRR1994876	6833927	5.70682	39	37	0.948718	UAAUAGGGACGUUGUAGACACAUC	UGCAAGUCUCAGUUACAUUGUUAAC	UAAUAGGGACGUUGUAGACACAUC	10	0	10	0	1 cited is ma	Yes	fn-111	mb-01011	ax-1001011	ku-01	ss-111111101100
PID0631	Lin2016-hq	Rhsol	Rhi-milR-99		SRR1994873	8626632	15.6492	135	124	0.918519	UAAUAGGGACGUUGUAGACACAUC	UGCAAGUCUCAGUUACAUUGUUAAC	UAAUAGGGACGUUGUAGACACAUC	34	0	34	0	1 cited is ma	Yes	fn-111	mb-01011	ax-1001011	ku-01	ss-111111101100
PID0631	Lin2016-hq	Rhsol	Rhi-milR-99		SRR1994877	6052857	4.29549	26	25	0.961538	UAAUAGGGACGUUGUAGACACA	CAAGUCUCAGUUACAUUGUUAAC	UAAUAGGGACGUUGUAGACACAUC	3	0	5	0	2 cited is not ma	Yes	fn-111	mb-01011	ax-1001011	ku-01	ss-111111101100
PID0631	Lin2016-hq	Rhsol	Rhi-milR-99		SRR1994875	4270606	2.10743	9	8	0.888889	UAAUAGGGACGUUGUAGACA	UCUCAGUUACAUUGUUAAC	UAAUAGGGACGUUGUAGACACAUC	1	0	3	0	2 cited is not ma	Yes	fn-111	mb-01011	ax-1001011	ku-01	ss-111111101100
PID0631	Lin2016-hq	Rhsol	Rhi-milR-99		SRR1994871	8692379	1.26548	11	8	0.727273	UAAUAGGGACGUUGUAGACAC	AAGUCUCAGUUACAUUGUUAAC	UAAUAGGGACGUUGUAGACACAUC	1	0	2	0	2 cited is not ma	No	fn-001	mb-01011	ax-1001011	ku-01	ss-111110101100
PID0632	Lin2016-hq	Rhsol	Rhi-milR-141		SRR1994875	4270606	2.80991	12	5	0.416667	UGGCCAGUAGUAGUUCCUUGAGA	UAAGGGGCUAUCAUGGAAGA	UGGCCAGUAGUAGUUCCUUGAGACC	0	0	2	1	3 cited not expressed	No	fn-001	mb-01111	ax-1111011	ku-01	ss-111110001001
PID0632	Lin2016-hq	Rhsol	Rhi-milR-141		SRR1994871	8692379	3.68139	32	16	0.5	UGGCCAGUAGUAGUUCCUUGAGA	UAAGGGGCUAUCAUGGAAGA	UGGCCAGUAGUAGUUCCUUGAGACC	1	0	7	1	2 cited is not ma	No	fn-101	mb-01111	ax-1111011	ku-01	ss-111110001001
PID0632	Lin2016-hq	Rhsol	Rhi-milR-141		SRR1994872	9065193	5.95685	54	20	0.37037	UAAGGGGCUAUCAUGGAAGAUUUG	GAUGCCUGGCCAGUAGUAGUUCCUUGAGAC	UGGCCAGUAGUAGUUCCUUGAGACC	0	0	5	0	3 cited not expressed	No	fn-101	mb-01111	ax-1001011	ku-01	ss-111110001000
PID0632	Lin2016-hq	Rhsol	Rhi-milR-141		SRR1994876	6833927	6.14581	42	18	0.428571	UAAGGGGCUAUCAUGGAAGAUUUG	GAUGCCUGGCCAGUAGUAGUUCCUUGAGAC	UGGCCAGUAGUAGUUCCUUGAGACC	0	0	8	0	3 cited not expressed	No	fn-101	mb-01111	ax-1001011	ku-01	ss-111110001000
PID0632	Lin2016-hq	Rhsol	Rhi-milR-141		SRR1994873	8626632	5.33232	46	21	0.456522	UAAGGGGCUAUCAUGGAAGAUUUG	GAUGCCUGGCCAGUAGUAGUUCCUUGAGAC	UGGCCAGUAGUAGUUCCUUGAGACC	1	0	8	0	2 cited is not ma	No	fn-101	mb-01111	ax-1001011	ku-01	ss-111110001000
PID0632	Lin2016-hq	Rhsol	Rhi-milR-141		SRR1994874	9302637	5.37482	50	16	0.32	UAAGGGGCUAUCAUGGAAGAUUUG	GAUGCCUGGCCAGUAGUAGUUCCUUGAGAC	UGGCCAGUAGUAGUUCCUUGAGACC	2	0	7	0	2 cited is not ma	No	fn-101	mb-01111	ax-1001011	ku-01	ss-111110001000
PID0632	Lin2016-hq	Rhsol	Rhi-milR-141		SRR1994877	6052857	6.77366	41	10	0.243902	UAAGGGGCUAUCAUGGAAGAUUUG	GAUGCCUGGCCAGUAGUAGUUCCUUGAGAC	UGGCCAGUAGUAGUUCCUUGAGACC	0	0	5	0	3 cited not expressed	No	fn-101	mb-01111	ax-1001011	ku-01	ss-111110001000
PID0633	Lin2016-hq	Rhsol	Rhi-milR-40		SRR1994873	8626632	7.07113	61	49	0.803279	CACAAUCCCUAUGUAGAAGUCAC	CGCUUGACAUGGGGUGUAUUG	CACAAUCCCUAUGUAGAAGUCA	1	0	17	0	2 cited is not ma	Yes	fn-111	mb-01011	ax-1011011	ku-01	ss-111111101100
PID0633	Lin2016-hq	Rhsol	Rhi-milR-40		SRR1994874	9302637	4.94483	46	36	0.782609	CACAAUCCCUAUGUAGAAGUCAC	CGCUUGACAUGGGGUGUAUUG	CACAAUCCCUAUGUAGAAGUCA	1	0	10	0	2 cited is not ma	No	fn-101	mb-01011	ax-1011011	ku-01	ss-111110101100
PID0633	Lin2016-hq	Rhsol	Rhi-milR-40		SRR1994877	6052857	2.9738	18	14	0.777778	CACAAUCCCUAUGUAGAAGUCAC	CGCUUGACAUGGGGUGUAUUG	CACAAUCCCUAUGUAGAAGUCA	2	0	4	0	2 cited is not ma	No	fn-101	mb-01011	ax-1011011	ku-01	ss-111110101100
PID0633	Lin2016-hq	Rhsol	Rhi-milR-40		SRR1994872	9065193	4.19186	38	19	0.5	CACAAUCCCUAUGUAGAAGUCAC	CGCUUGACAUGGGGUGUAUUG	CACAAUCCCUAUGUAGAAGUCA	0	0	5	0	3 cited not expressed	No	fn-101	mb-01011	ax-1011011	ku-01	ss-111110001100
PID0633	Lin2016-hq	Rhsol	Rhi-milR-40		SRR1994876	6833927	2.92658	20	13	0.65	CACAAUCCCUAUGUAGAAGUCAC	CGCUUGACAUGGGGUGUAUUG	CACAAUCCCUAUGUAGAAGUCA	1	0	3	0	2 cited is not ma	No	fn-101	mb-01011	ax-1011011	ku-01	ss-101110101100
PID0633	Lin2016-hq	Rhsol	Rhi-milR-40		SRR1994875	4270606	1.40495	6	5	0.833333	GCACAAUCCCUAUGUAGAAGUC	CUUGACAUGGGGUGUAUUGG	CACAAUCCCUAUGUAGAAGUCA	0	0	1	0	3 cited not expressed	No	fn-011	mb-01011	ax-1011011	ku-01	ss-110111111100
PID0633	Lin2016-hq	Rhsol	Rhi-milR-40		SRR1994871	8692379	1.15043	10	7	0.7	CACAAUCCCUAUGUAGAAGUC	CUUGACAUGGGGUGUAUUG	CACAAUCCCUAUGUAGAAGUCA	0	0	2	0	3 cited not expressed	No	fn-001	mb-01011	ax-1011011	ku-01	ss-111110111100
PID0635	Lin2016-hq	Rhsol	Rhi-milR-6		SRR1994872	9065193	0	0	0	NA	AAGUGGAGUUUUGCAAUGG	AUUGUUUAUUAUUCCAACAAUGAU	AAGUGGAGUUUUGCAAUGG	0	0	0	0	4 locus not expressed	No	fn-001	mb-00010	ax-1001001	ku-01	ss-000010001000
PID0635	Lin2016-hq	Rhsol	Rhi-milR-6		SRR1994876	6833927	0	0	0	NA	AAGUGGAGUUUUGCAAUGG	AUUGUUUAUUAUUCCAACAAUGAU	AAGUGGAGUUUUGCAAUGG	0	0	0	0	4 locus not expressed	No	fn-001	mb-00010	ax-1001001	ku-01	ss-000010001000
PID0635	Lin2016-hq	Rhsol	Rhi-milR-6		SRR1994875	4270606	0	0	0	NA	AAGUGGAGUUUUGCAAUGG	AUUGUUUAUUAUUCCAACAAUGAU	AAGUGGAGUUUUGCAAUGG	0	0	0	0	4 locus not expressed	No	fn-001	mb-00010	ax-1001001	ku-01	ss-000010001000
PID0635	Lin2016-hq	Rhsol	Rhi-milR-6		SRR1994873	8626632	0	0	0	NA	AAGUGGAGUUUUGCAAUGG	AUUGUUUAUUAUUCCAACAAUGAU	AAGUGGAGUUUUGCAAUGG	0	0	0	0	4 locus not expressed	No	fn-001	mb-00010	ax-1001001	ku-01	ss-000010001000
PID0635	Lin2016-hq	Rhsol	Rhi-milR-6		SRR1994871	8692379	0	0	0	NA	AAGUGGAGUUUUGCAAUGG	AUUGUUUAUUAUUCCAACAAUGAU	AAGUGGAGUUUUGCAAUGG	0	0	0	0	4 locus not expressed	No	fn-001	mb-00010	ax-1001001	ku-01	ss-000010001000
PID0635	Lin2016-hq	Rhsol	Rhi-milR-6		SRR1994874	9302637	0	0	0	NA	AAGUGGAGUUUUGCAAUGG	AUUGUUUAUUAUUCCAACAAUGAU	AAGUGGAGUUUUGCAAUGG	0	0	0	0	4 locus not expressed	No	fn-001	mb-00010	ax-1001001	ku-01	ss-000010001000
PID0635	Lin2016-hq	Rhsol	Rhi-milR-6		SRR1994877	6052857	0	0	0	NA	AAGUGGAGUUUUGCAAUGG	AUUGUUUAUUAUUCCAACAAUGAU	AAGUGGAGUUUUGCAAUGG	0	0	0	0	4 locus not expressed	No	fn-001	mb-00010	ax-1001001	ku-01	ss-000010001000
PID0636	Wang2016-nz	Fugra	Fg-HN-milR1		SRR2970501_1	5381200	1.30083	7	7	1	AGGGACAAGCCUUGCGGCAGCU	CUGGGCGGAAGGCUUCUCUCGUAG	AGGGACAAGCCUUGCGGCAGCU	2	0	2	0	1 cited is ma	Yes	fn-111	mb-01111	ax-1001011	ku-01	ss-111111101100
PID0636	Wang2016-nz	Fugra	Fg-HN-milR1		SRR3055827_1	4434060	4.05948	18	18	1	AGGGACAAGCCUUGCGGCAGCU	CUGGGCGGAAGGCUUCUCUCGUAG	AGGGACAAGCCUUGCGGCAGCU	2	0	2	0	1 cited is ma	No	fn-011	mb-01011	ax-1001011	ku-01	ss-101111101100
PID0637	Wang2016-nz	Fugra	Fg-HN-milR2		SRR3055827_1	4434060	1111.4	4928	4928	1	UAGGAAAGGCAGUUAACUAGGA	CUGGUUAGCUCACUUUCUUACA	UAGGAAAGGCAGUUAACUAGGA	3782	0	3782	0	1 cited is ma	Yes	fn-111	mb-01111	ax-1011111	ku-11	ss-111111111110
PID0637	Wang2016-nz	Fugra	Fg-HN-milR2		SRR2970501_1	5381200	12028	64725	64725	1	UAGGAAAGGCAGUUAACUAGGA	CUGGUUAGCUCACUUUCUUACA	UAGGAAAGGCAGUUAACUAGGA	49091	0	49091	0	1 cited is ma	Yes	fn-111	mb-01011	ax-1011111	ku-11	ss-111111111110
PID0638	Wang2016-nz	Fugra	Fg-HN-milR3		SRR2970501_1	5381200	3.71664	20	20	1	AAGAAAAUGGGAGCGAGCACA	GUUCGCUUCUUAUUUCUUUU	AAGAAAAUGGGAGCGAGCACA	4	0	4	0	1 cited is ma	Yes	fn-111	mb-01011	ax-1011011	ku-01	ss-111111111110
PID0638	Wang2016-nz	Fugra	Fg-HN-milR3		SRR3055827_1	4434060	7.89344	35	35	1	UAAGAAAAUGGGAGCGAGCA	UUCGCUUCUUAUUUCUUUUG	AAGAAAAUGGGAGCGAGCACA	3	0	5	0	2 cited is not ma	Yes	fn-111	mb-01011	ax-1011011	ku-01	ss-101111111100
PID0639	Wang2016-nz	Fugra	Fg-HN-milR4		SRR2970501_1	5381200	0.929161	5	5	1	AGGAACGGGGUACUGCAGUCUAC	GGAUUUGCCAGAUCCUUUCCUAU	AGGAACGGGGUACUGCAGUCUAC	2	0	2	0	1 cited is ma	Yes	fn-111	mb-01011	ax-1011111	ku-01	ss-111111101110
PID0639	Wang2016-nz	Fugra	Fg-HN-milR4		SRR3055827_1	4434060	0.451054	2	2	1	AAAGGAACGGGGUACUGCAGUCUACA	CGGAUUUGCCAGAUCCUUUCCUAUAG	AGGAACGGGGUACUGCAGUCUAC	0	0	1	0	3 cited not expressed	No	fn-011	mb-01011	ax-1001001	ku-01	ss-100011101100
PID0640	Wang2016-nz	Fugra	Fg-HN-milR5		SRR2970501_1	5381200	5.01747	27	25	0.925926	UGAGGUUGUAGCGGAGGUCGA	UGCCUUGGUAGUAACCUCCACC	UGAGGUUGUAGCGGAGGUCGA	9	0	9	0	1 cited is ma	Yes	fn-111	mb-01011	ax-1001011	ku-01	ss-111111101100
PID0640	Wang2016-nz	Fugra	Fg-HN-milR5		SRR3055827_1	4434060	3.3829	15	13	0.866667	UGAGGUUGUAGCGGAGGUCGA	UGCCUUGGUAGUAACCUCCACC	UGAGGUUGUAGCGGAGGUCGA	7	0	7	0	1 cited is ma	Yes	fn-111	mb-01011	ax-1001011	ku-01	ss-111111101100
PID0641	Wang2016-nz	Fugra	Fg-HN-milR6		SRR2970501_1	5381200	4.83164	26	9	0.346154	ACUGUCAAGCUCAUAUCUCUG	GAAGUAUGUAAGGUUGGCUGGUAU	UUACUGUCAAGCUCAUAUCUC	0	0	2	0	3 cited not expressed	No	fn-101	mb-01011	ax-1011011	ku-01	ss-111110011100
PID0641	Wang2016-nz	Fugra	Fg-HN-milR6		SRR3055827_1	4434060	5.8637	26	3	0.115385	UGGCUGGUAUGAGAGGACGC	UUUUUUUUUUACUGUCAAG	UUACUGUCAAGCUCAUAUCUC	0	0	1	0	3 cited not expressed	No	fn-001	mb-01011	ax-1011011	ku-01	ss-110111001100
PID0643	Wang2016-nz	Fugra	Fg-HN-milR8		SRR2970501_1	5381200	98.1194	528	528	1	UUAUAUAUUUUUUGACUGUCAA	GAAAGUCAGGAAAUGUAUAUAUA	UUAUAUAUUUUUUGACUGUCAA	256	8	256	8	1 cited is ma	Yes	fn-111	mb-01111	ax-1111111	ku-11	ss-111111111111
PID0643	Wang2016-nz	Fugra	Fg-HN-milR8		SRR3055827_1	4434060	8.57002	38	38	1	UUAUAUAUUUUUUGACUGUCAA	GAAAGUCAGGAAAUGUAUAUAUA	UUAUAUAUUUUUUGACUGUCAA	13	0	13	0	1 cited is ma	Yes	fn-111	mb-01111	ax-1011111	ku-01	ss-111111111110
PID0644	Wang2016-nz	Fugra	Fg-HN-milR9		SRR3055827_1	4434060	259.582	1151	1150	0.999131	GAUAAGGAGUGGUCGAGCGGGA	CUGUUCGACCGCUCCUUAUCUU	GAUAAGGAGUGGUCGAGCGGGA	371	1	371	1	1 cited is ma	Yes	fn-111	mb-01111	ax-1111011	ku-11	ss-101111111111
PID0644	Wang2016-nz	Fugra	Fg-HN-milR9		SRR2970501_1	5381200	32.3348	174	169	0.971264	GAUAAGGAGUGGUCGAGCGGGA	CUGUUCGACCGCUCCUUAUCUU	GAUAAGGAGUGGUCGAGCGGGA	27	0	27	0	1 cited is ma	Yes	fn-111	mb-01011	ax-1011011	ku-01	ss-101111111100
PID0645	Wang2016-nz	Fugra	Fg-HN-milR10		SRR2970501_1	5381200	13.9374	75	17	0.226667	UGGAGACGAAUGCGAUCUUU	AGAUCGCAUUCGUCGCUACC	UGGAGACGAAUGCGAUCUUU	2	0	2	0	1 cited is ma	No	fn-101	mb-01011	ax-1011011	ku-01	ss-101110011100
PID0645	Wang2016-nz	Fugra	Fg-HN-milR10		SRR3055827_1	4434060	6.54028	29	4	0.137931	UGGAGACGAAUGCGAUCUU	GAUCGCAUUCGUCGCUACC	UGGAGACGAAUGCGAUCUUU	0	0	1	0	3 cited not expressed	No	fn-001	mb-01011	ax-1011001	ku-01	ss-100011011100
PID0646	Wang2016-nz	Fugra	Fg-HN-milR11		SRR2970501_1	5381200	1.30083	7	7	1	UGGCAUGUUGGACAAAAGGUGUA	UCAUCUUCUGUCAAGGCUAUGCUGUU	UGGCAUGUUGGACAAAAGGUGUA	3	0	3	0	1 cited is ma	Yes	fn-111	mb-01111	ax-1011011	ku-01	ss-111111111100
PID0646	Wang2016-nz	Fugra	Fg-HN-milR11		SRR3055827_1	4434060	1.35316	6	6	1	UGGCAUGUUGGACAAAAGGUGUA	UCAUCUUCUGUCAAGGCUAUGCUGUU	UGGCAUGUUGGACAAAAGGUGUA	1	0	1	0	1 cited is ma	No	fn-011	mb-01011	ax-1011011	ku-01	ss-110111111100
PID0647	Wang2016-nz	Fugra	Fg-HN-milR12		SRR2970501_1	5381200	1.48666	8	7	0.875	UGUGACGGUUGGGUUUCUAA	GGGUGUAACUGUUACAAGUC	UGUGACGGUUGGGUUUCUAA	6	0	6	0	1 cited is ma	Yes	fn-111	mb-00011	ax-1011111	ku-01	ss-111111111110
PID0647	Wang2016-nz	Fugra	Fg-HN-milR12		SRR3055827_1	4434060	1.57869	7	7	1	UGUGACGGUUGGGUUUCUAA	GGGUGUAACUGUUACAAGUC	UGUGACGGUUGGGUUUCUAA	1	0	1	0	1 cited is ma	No	fn-011	mb-00011	ax-1011011	ku-01	ss-110111111100
PID0648	Wang2016-nz	Fugra	Fg-HN-milR13		SRR2970501_1	5381200	1.30083	7	6	0.857143	UGGAAUGCUGCAUAUACUCAC	GAGUUUGUCUCGGAUGUUCCAAG	UGGAAUGCUGCAUAUACUCAC	4	0	4	0	1 cited is ma	Yes	fn-111	mb-01011	ax-1010011	ku-01	ss-111101101110
PID0648	Wang2016-nz	Fugra	Fg-HN-milR13		SRR3055827_1	4434060	0.451054	2	1	0.5	UGGAAUGCUGCAUAUACUCAC	GAGUUUGUCUCGGAUGUUCCAAG	UGGAAUGCUGCAUAUACUCAC	0	0	0	0	3 cited not expressed	No	fn-001	mb-01011	ax-1010011	ku-01	ss-110100101100
PID0649	Wang2016-nz	Fugra	Fg-HN-milR14		SRR2970501_1	5381200	13.0083	70	66	0.942857	UCUUGAUAGUGAAUAGAGCGG	AGGUUCUAUCUAAUGCUAAGAGA	UCUUGAUAGUGAAUAGAGCGG	32	0	32	0	1 cited is ma	Yes	fn-111	mb-01011	ax-1001011	ku-01	ss-111111101110
PID0649	Wang2016-nz	Fugra	Fg-HN-milR14		SRR3055827_1	4434060	2.4808	11	11	1	UCUUGAUAGUGAAUAGAGCGG	AGGUUCUAUCUAAUGCUAAGAGA	UCUUGAUAGUGAAUAGAGCGG	4	0	4	0	1 cited is ma	Yes	fn-111	mb-01011	ax-1001011	ku-01	ss-111111101100
PID0650	Wang2016-nz	Fugra	Fg-HN-milR15		SRR2970501_1	5381200	479.261	2579	2579	1	UGAGUAAAUUCAGAACGCUUGA	AAGCCUUCUCAAUUUACUCAAA	AAGCCUUCUCAAUUUACUCAAA	0	1754	1754	0	3 cited not expressed	Yes	fn-111	mb-01111	ax-1011111	ku-11	ss-111111111110
PID0650	Wang2016-nz	Fugra	Fg-HN-milR15		SRR3055827_1	4434060	126.07	559	559	1	UGAGUAAAUUCAGAACGCUUGA	AAGCCUUCUCAAUUUACUCAAA	AAGCCUUCUCAAUUUACUCAAA	0	352	352	0	3 cited not expressed	Yes	fn-111	mb-01011	ax-1011111	ku-11	ss-111111111110
PID0652	Wang2016-nz	Fugra	Fg-HN-milR17		SRR2970501_1	5381200	2.60165	14	9	0.642857	UGAGUAGAAUGUAAAGGGUAA	AGUCUUUAGUAUUCCAUGCUCUCC	UGAGUAGAAUGUAAAGGGUAA	5	0	5	0	1 cited is ma	No	fn-101	mb-01011	ax-1010011	ku-01	ss-111100111100
PID0652	Wang2016-nz	Fugra	Fg-HN-milR17		SRR3055827_1	4434060	1.80422	8	3	0.375	UAUCCCAAGCACCCCCUGUGA	AGUCUUUAGUAUUCCAUGCUCUCC	UGAGUAGAAUGUAAAGGGUAA	0	0	1	0	3 cited not expressed	No	fn-001	mb-00010	ax-1010011	ku-01	ss-100100011100
PID0653	Wang2016-nz	Fugra	Fg-HN-milR18		SRR3055827_1	4434060	1.35316	6	5	0.833333	UGGGCUGAGGUGGUGGUGGGCA	CCCUCAAUCCCGGUCUAGA	UGGGCUGAGGUGGUGGUGGGCA	2	0	2	0	1 cited is ma	Yes	fn-111	mb-01011	ax-1011011	ku-01	ss-111111111110
PID0653	Wang2016-nz	Fugra	Fg-HN-milR18		SRR2970501_1	5381200	1.48666	8	6	0.75	UGGGCUGAGGUGGUGGUGGGCA	CCCUCAAUCCCGGUCUAGA	UGGGCUGAGGUGGUGGUGGGCA	3	0	3	0	1 cited is ma	No	fn-101	mb-01011	ax-1011011	ku-01	ss-111110111100
PID0654	Wang2016-nz	Fugra	Fg-HN-milR19		SRR3055827_1	4434060	204.327	906	904	0.997792	ACAUACGACCAUAGCUCGCAGAG	CUGCGAAGCGCUGGAUUAGUAGUU	ACAUACGACCAUAGCUCGCAG	21	0	187	0	2 cited is not ma	Yes	fn-111	mb-01011	ax-1001011	ku-11	ss-101111101110
PID0654	Wang2016-nz	Fugra	Fg-HN-milR19		SRR2970501_1	5381200	0	0	0	NA	ACAUACGACCAUAGCUCGCAG	GCGAAGCGCUGGAUUAGUAGUU	ACAUACGACCAUAGCUCGCAG	0	0	0	0	4 locus not expressed	No	fn-001	mb-01011	ax-1001011	ku-01	ss-000110001100
PID0655	Wang2016-nz	Fugra	Fg-HN-milR20		SRR2970501_1	5381200	2.78748	15	15	1	AGGGAAAGAUGGGUAGAUGCA	CAUCGUCGCUCAUCUUUCAGGU	AGGGAAAGAUGGGUAGAUGCA	3	0	3	0	1 cited is ma	Yes	fn-111	mb-01011	ax-1001011	ku-01	ss-111111101110
PID0655	Wang2016-nz	Fugra	Fg-HN-milR20		SRR3055827_1	4434060	3.15738	14	13	0.928571	AAGGGAAAGAUGGGUAGAUGC	AUCGUCGCUCAUCUUUCAGGUG	AGGGAAAGAUGGGUAGAUGCA	0	0	2	0	3 cited not expressed	Yes	fn-111	mb-01011	ax-1001011	ku-01	ss-101111101100
PID0656	Wang2016-nz	Fugra	Fg-HN-milR21		SRR2970501_1	5381200	2.78748	15	15	1	AGGGAAAGAUGGGUAGAUGCA	CAUCGUCGCUCAUCUUUCAGGU	AGGGAAAGAUGGGUAGAUGCA	3	0	3	0	1 cited is ma	Yes	fn-111	mb-01011	ax-1001011	ku-01	ss-111111101110
PID0656	Wang2016-nz	Fugra	Fg-HN-milR21		SRR3055827_1	4434060	3.15738	14	13	0.928571	AAGGGAAAGAUGGGUAGAUGC	AUCGUCGCUCAUCUUUCAGGUG	AGGGAAAGAUGGGUAGAUGCA	0	0	2	0	3 cited not expressed	Yes	fn-111	mb-01011	ax-1001011	ku-01	ss-101111101100
PID0657	Wang2016-nz	Fugra	Fg-HN-milR22		SRR2970501_1	5381200	3.15915	17	14	0.823529	AUCGCUGUGGAAGAAACGUGGA	UCGUCAUUCUUCGCACCGUCCAGCGCUCU	AUCGCUGUGGAAGAAACGUGGA	3	0	3	0	1 cited is ma	Yes	fn-111	mb-01010	ax-1001011	ku-01	ss-111111101000
PID0657	Wang2016-nz	Fugra	Fg-HN-milR22		SRR3055827_1	4434060	1.12763	5	3	0.6	ACUAUCGCUGUGGAAGAAACGUGGAAGA	UUUUCGUCAUUCUUCGCACCGUCCAGCGCUCUCUC	AUCGCUGUGGAAGAAACGUGGA	0	0	2	0	3 cited not expressed	No	fn-001	mb-01011	ax-1001001	ku-01	ss-101010101000
PID0658	Wang2016-nz	Fugra	Fg-HN-milR23		SRR2970501_1	5381200	6.13246	33	31	0.939394	UGGAGAACAGUGUAGACAGCCC	GAGUGCUAGGGAUGUACUCGGGG	UGGAGAACAGUGUAGACAGCCC	5	0	5	0	1 cited is ma	Yes	fn-111	mb-01111	ax-1001011	ku-01	ss-111111101100
PID0658	Wang2016-nz	Fugra	Fg-HN-milR23		SRR3055827_1	4434060	1.12763	5	4	0.8	UGGAGAACAGUGUAGACAGCCCAG	GGGAGUGCUAGGGAUGUACUCGGGG	UGGAGAACAGUGUAGACAGCCC	0	0	1	0	3 cited not expressed	No	fn-001	mb-01011	ax-1001011	ku-01	ss-110110101100
PID0660	Wang2016-nz	Fugra	Fg-HN-milR25		SRR2970501_1	5381200	1458.41	7848	7840	0.998981	UCAAACUUUAGCGAUGUGUGA	ACACAUCGCCAAAGUUUGAGA	UCUCAAACUUUAGCGAUGUGUGA	323	119	1221	10	2 cited is not ma	Yes	fn-111	mb-01111	ax-1111011	ku-11	ss-111111111101
PID0660	Wang2016-nz	Fugra	Fg-HN-milR25		SRR3055827_1	4434060	301.981	1339	1331	0.994025	UCAAACUUUAGCGAUGUGUGA	ACACAUCGCCAAAGUUUGAGA	UCUCAAACUUUAGCGAUGUGUGA	83	32	215	1	2 cited is not ma	Yes	fn-111	mb-01111	ax-1111011	ku-11	ss-111111111101
PID0661	Wang2016-nz	Fugra	Fg-HN-milR26		SRR3055827_1	4434060	22.5527	100	100	1	GGCAACUUGGUCUUGGGCUU	GCUCAAGAUCAAGUUGUCUU	AGGCAACUUGGUCUUGGGCUU	1	0	15	0	2 cited is not ma	Yes	fn-111	mb-01011	ax-1011011	ku-00	ss-111111111100
PID0661	Wang2016-nz	Fugra	Fg-HN-milR26		SRR2970501_1	5381200	3.71664	20	20	1	AGGCAACUUGGUCUUGGGCUU	GCUCAAGAUCAAGUUGUCUUG	AGGCAACUUGGUCUUGGGCUU	2	0	2	0	1 cited is ma	Yes	fn-111	mb-01011	ax-1011011	ku-00	ss-111111111100
PID0662	Wang2016-nz	Fugra	Fg-HN-milR27		SRR2970501_1	5381200	1.30083	7	7	1	GCACAUGACUGUGGCCAUGGCU	CCGUGGCUAUAGAAUGUGCGC	GCACAUGACUGUGGCCAUGGCU	4	0	4	0	1 cited is ma	Yes	fn-111	mb-01011	ax-1011111	ku-01	ss-111111101110
PID0662	Wang2016-nz	Fugra	Fg-HN-milR27		SRR3055827_1	4434060	2.4808	11	11	1	GCACAUGACUGUGGCCAUGGCUU	ACGAAAUGUCCGUGGCUAUAGAAUGUGCGC	GCACAUGACUGUGGCCAUGGCU	2	0	3	0	2 cited is not ma	Yes	fn-111	mb-00111	ax-1001011	ku-01	ss-111111101010
PID0664	Wang2016-nz	Fugra	Fg-HN-milR29		SRR2970501_1	5381200	4.45997	24	21	0.875	GUUGAACGAACCUUGGCCGAA	CGUCACGAUGCUCGCUCAACGU	GUUGAACGAACCUUGGCCGAA	16	0	16	0	1 cited is ma	Yes	fn-111	mb-01011	ax-1001011	ku-01	ss-111111101110
PID0664	Wang2016-nz	Fugra	Fg-HN-milR29		SRR3055827_1	4434060	2.02974	9	7	0.777778	GUUGAACGAACCUUGGCCGAA	CGUCACGAUGCUCGCUCAACGU	GUUGAACGAACCUUGGCCGAA	1	0	1	0	1 cited is ma	No	fn-001	mb-01011	ax-1001011	ku-01	ss-100110101100
PID0666	Wang2016-nz	Fugra	Fg-HN-milR31		SRR2970501_1	5381200	50.3605	271	68	0.250923	UGGAGAAAAUUGAGAAGGCUCGA	GAGCCUUCUCAAUUUUCUCCAUG	UGGAGAAAAUUGAGAAGGCUCGA	26	0	26	0	1 cited is ma	No	fn-101	mb-01011	ax-1011011	ku-00	ss-111110011100
PID0666	Wang2016-nz	Fugra	Fg-HN-milR31		SRR3055827_1	4434060	115.244	511	179	0.350294	UGGAGAAAAUUGAGAAGGCU	CCUUCUCAAUUUUCUCCAUG	UGGAGAAAAUUGAGAAGGCUCGA	20	0	23	0	2 cited is not ma	No	fn-101	mb-01111	ax-1011011	ku-00	ss-101110011100
PID0667	Wang2016-nz	Fugra	Fg-HN-milR32		SRR2970501_1	5381200	2.41582	13	7	0.538462	UCUGGCAUUGUUGUGAUGAA	CAUCACGAUAGUGCCAGAAC	UCUGGCAUUGUUGUGAUGAA	5	0	5	0	1 cited is ma	No	fn-101	mb-01011	ax-1011011	ku-01	ss-111110111100
PID0667	Wang2016-nz	Fugra	Fg-HN-milR32		SRR3055827_1	4434060	0.676581	3	0	0	UCUGGCAUUGUUGUGAUGAA	CAUCACGAUAGUGCCAGAAC	UCUGGCAUUGUUGUGAUGAA	0	0	0	0	3 cited not expressed	No	fn-001	mb-01011	ax-1011011	ku-01	ss-110111011100
PID0668	Wang2016-nz	Fugra	Fg-HN-milR33		SRR2970501_1	5381200	9.29161	50	50	1	UCAGAGCGGUGAUUGAUCAAGAU	CUUGUCAAUUAUCGGUCUGAUC	UCAGAGCGGUGAUUGAUCAAGAU	17	0	17	0	1 cited is ma	Yes	fn-111	mb-01111	ax-1011011	ku-01	ss-111111111100
PID0668	Wang2016-nz	Fugra	Fg-HN-milR33		SRR3055827_1	4434060	2.4808	11	11	1	UCAGAGCGGUGAUUGAUCAAGAU	CUUGUCAAUUAUCGGUCUGAUC	UCAGAGCGGUGAUUGAUCAAGAU	2	0	2	0	1 cited is ma	Yes	fn-111	mb-01011	ax-1011011	ku-01	ss-111111111100
PID0669	Wang2016-nz	Fugra	Fg-HN-milR34		SRR2970501_1	5381200	0.743329	4	4	1	CGGGCUGGGUCUUGGGGAGGGG	CCUUCCCUGUCCCUCCACCCGUC	CGGGCUGGGUCUUGGGGAGGGG	1	0	1	0	1 cited is ma	Yes	fn-111	mb-01011	ax-1000111	ku-01	ss-110101101110
PID0669	Wang2016-nz	Fugra	Fg-HN-milR34		SRR3055827_1	4434060	3.3829	15	15	1	CGGGCUGGGUCUUGGGGAGGGG	CCUUCCCUGUCCCUCCACCCGUC	CGGGCUGGGUCUUGGGGAGGGG	5	0	5	0	1 cited is ma	Yes	fn-111	mb-01011	ax-1000011	ku-01	ss-101101101110
PID0670	Wang2016-nz	Fugra	Fg-HN-milR35		SRR3055827_1	4434060	8.57002	38	37	0.973684	AGUCAACGUAUGGAGCUAUGGCU	CUAUAGCUCCAUACGUUGACUUA	AGUCAACGUAUGGAGCUAUGGCU	5	0	5	0	1 cited is ma	Yes	fn-111	mb-01111	ax-1011011	ku-01	ss-101111111100
PID0670	Wang2016-nz	Fugra	Fg-HN-milR35		SRR2970501_1	5381200	2.22999	12	9	0.75	UAGCUCCAUACGUUGACUUA	AGUCAACGUAUGGAGCUAUG	AGUCAACGUAUGGAGCUAUGGCU	0	0	4	0	3 cited not expressed	No	fn-101	mb-01011	ax-1011011	ku-01	ss-101110111100
PID0671	Wang2016-nz	Fugra	Fg-HN-milR36		SRR2970501_1	5381200	7.06162	38	32	0.842105	GGCUGGUGCUGGUGCAGAUUUGGAGCA	CUCCCGGAUCAGCACAGCCUACCAGCUUU	GCUGGUGCUGGUGCAGAUUUG	0	0	10	0	3 cited not expressed	Yes	fn-111	mb-01111	ax-1011001	ku-01	ss-101011101110
PID0671	Wang2016-nz	Fugra	Fg-HN-milR36		SRR3055827_1	4434060	6.08923	27	22	0.814815	GGCUGGUGCUGGUGCAGAUUUGGAGCA	CUCCCGGAUCAGCACAGCCUACCAGCUUU	GCUGGUGCUGGUGCAGAUUUG	2	0	5	0	2 cited is not ma	Yes	fn-111	mb-01111	ax-1011001	ku-01	ss-101011101100
PID0674	Wang2016-nz	Fugra	Fg-HN-milR39		SRR3055827_1	4434060	4.28501	19	18	0.947368	GUUCUUUGCGAUCGUCUCAAGCA	GUUGGGGCAGAGAAGCAGGAACAA	GUUCUUUGCGAUCGUCUCAAGCA	11	0	11	0	1 cited is ma	Yes	fn-111	mb-01011	ax-1011011	ku-01	ss-101111101110
PID0674	Wang2016-nz	Fugra	Fg-HN-milR39		SRR2970501_1	5381200	0.929161	5	4	0.8	UGCGAUCGUCUCAAGCAUUA	GUUGGGGCAGAGAAGCAGGAACAA	GUUCUUUGCGAUCGUCUCAAGCA	0	0	2	0	3 cited not expressed	No	fn-001	mb-00011	ax-1011011	ku-01	ss-101110101100
PID0675	Wang2016-nz	Fugra	Fg-HN-milR40		SRR3055827_1	4434060	2.02974	9	9	1	GAGGGAGGAGGUCUAAAGAUU	UUUUUGACUCUUCCCUCUG	GAGGGAGGAGGUCUAAAGAUU	2	0	2	0	1 cited is ma	Yes	fn-111	mb-01011	ax-1011111	ku-01	ss-101111111110
PID0675	Wang2016-nz	Fugra	Fg-HN-milR40		SRR2970501_1	5381200	0.929161	5	5	1	GAGGGAGGAGGUCUAAAGAUUUCA	GUGUUUUUGACUCUUCCCUCUG	GAGGGAGGAGGUCUAAAGAUU	0	0	1	0	3 cited not expressed	No	fn-011	mb-01011	ax-1011011	ku-01	ss-100111111100
PID0676	Wang2016-nz	Fugra	Fg-HN-milR41		SRR2970501_1	5381200	1.48666	8	7	0.875	UGGGUCUGGGAGUGGUAGGGGA	CACUAGUCUCUCAGUCCAGUU	UGGGUCUGGGAGUGGUAGGGGA	2	0	2	0	1 cited is ma	No	fn-011	mb-01011	ax-1010011	ku-01	ss-111101101100
PID0676	Wang2016-nz	Fugra	Fg-HN-milR41		SRR3055827_1	4434060	3.60843	16	11	0.6875	UGGGUCUGGGAGUGGUAGGGGA	CACUAGUCUCUCAGUCCAGUU	UGGGUCUGGGAGUGGUAGGGGA	6	0	6	0	1 cited is ma	No	fn-101	mb-01111	ax-1010011	ku-01	ss-111100101100
PID0678	Wang2016-nz	Fugra	Fg-HN-milR43		SRR2970501_1	5381200	3.90248	21	21	1	UGGGAGGGUGUGGAGAGGAA	CCUUUCCCCGCUCUCCAGACAG	UGGGAGGGUGUGGAGAGGAA	15	0	15	0	1 cited is ma	Yes	fn-111	mb-01111	ax-1011111	ku-01	ss-111111111110
PID0678	Wang2016-nz	Fugra	Fg-HN-milR43		SRR3055827_1	4434060	6.08923	27	25	0.925926	UGGGAGGGUGUGGAGAGGAA	CCUUUCCCCGCUCUCCAGACAG	UGGGAGGGUGUGGAGAGGAA	21	0	21	0	1 cited is ma	Yes	fn-111	mb-01011	ax-1011111	ku-01	ss-111111111110
PID0680	Wang2016-nz	Fugra	Fg-HN-milR45		SRR3055827_1	4434060	1.57869	7	7	1	UGUCUCUGGAUCUGUUGACGA	UGAACCUUGACUUCUCCUUCAUACU	UGUCUCUGGAUCUGUUGACGA	4	0	4	0	1 cited is ma	Yes	fn-111	mb-01011	ax-1001011	ku-01	ss-111111101010
PID0680	Wang2016-nz	Fugra	Fg-HN-milR45		SRR2970501_1	5381200	0.929161	5	4	0.8	UGUCUCUGGAUCUGUUGACGA	UGAACCUUGACUUCUCCUUCAUACU	UGUCUCUGGAUCUGUUGACGA	3	0	3	0	1 cited is ma	No	fn-101	mb-01011	ax-1001011	ku-01	ss-101110101010
PID0681	Wang2016-nz	Fugra	Fg-HN-milR46		SRR3055827_1	4434060	1.35316	6	6	1	GGAGGAGGCGACUGCGACUGGG	CAGACGUAGUUUCCUGCUCAGAAG	GGAGGAGGCGACUGCGACUGGG	2	0	2	0	1 cited is ma	Yes	fn-111	mb-00011	ax-1001011	ku-01	ss-111111101100
PID0681	Wang2016-nz	Fugra	Fg-HN-milR46		SRR2970501_1	5381200	1.11499	6	4	0.666667	ACGGGUGGAGGAGGCGACUGCGA	CAGACGUAGUUUCCUGCUCAGAAG	GGAGGAGGCGACUGCGACUGGG	0	0	1	0	3 cited not expressed	No	fn-001	mb-00011	ax-1001011	ku-01	ss-110110101100
PID0682	Wang2016-nz	Fugra	Fg-HN-milR47		SRR3055827_1	4434060	2.02974	9	9	1	UCAGAACUCAGAAGACUCUGUA	CAGAGAUCUCUGGGUCUUGAU	UCAGAACUCAGAAGACUCUGUA	5	0	5	0	1 cited is ma	Yes	fn-111	mb-01011	ax-1011011	ku-01	ss-111111111110
PID0682	Wang2016-nz	Fugra	Fg-HN-milR47		SRR2970501_1	5381200	0.371664	2	1	0.5	UCAGAACUCAGAAGACUCUGUA	CAGAGAUCUCUGGGUCUUGAU	UCAGAACUCAGAAGACUCUGUA	0	0	0	0	3 cited not expressed	No	fn-001	mb-01011	ax-1011011	ku-01	ss-110110111100
PID0683	Wang2016-nz	Fugra	Fg-HN-milR48		SRR2970501_1	5381200	2.22999	12	12	1	GACAAGGAGUGGUCGAGCGGU	CGUUCGACCACUCCUUGUCUU	GACAAGGAGUGGUCGAGCGGU	2	0	2	0	1 cited is ma	Yes	fn-111	mb-01011	ax-1011011	ku-01	ss-101111111110
PID0683	Wang2016-nz	Fugra	Fg-HN-milR48		SRR3055827_1	4434060	5.18712	23	22	0.956522	GACAAGGAGUGGUCGAGCGGU	CGUUCGACCACUCCUUGUCUU	GACAAGGAGUGGUCGAGCGGU	9	0	9	0	1 cited is ma	Yes	fn-111	mb-01011	ax-1011011	ku-01	ss-101111111110
PID0684	Wang2016-nz	Fugra	Fg-HN-milR49		SRR2970501_1	5381200	0.371664	2	2	1	UGGGAAUCUAGAUUGACUCGCA	UUGGUCAAUUUAGCUGGCUGUU	UGGGAAUCUAGAUUGACUCGCA	2	0	2	0	1 cited is ma	No	fn-011	mb-01011	ax-1001111	ku-01	ss-111111101110
PID0684	Wang2016-nz	Fugra	Fg-HN-milR49		SRR3055827_1	4434060	1.12763	5	5	1	UGGGAAUCUAGAUUGACUCGCA	UUGGUCAAUUUAGCUGGCUGUU	UGGGAAUCUAGAUUGACUCGCA	3	0	3	0	1 cited is ma	Yes	fn-111	mb-01011	ax-1001111	ku-01	ss-111111101110
PID0685	Wang2016-nz	Fugra	Fg-HN-milR50		SRR3055827_1	4434060	2.25527	10	10	1	GGGGAGGUCAGGUAUGAGAUUGA	GACAGAUCAUACAUACCUCUCUUU	GGGGAGGUCAGGUAUGAGAUUGA	5	0	5	0	1 cited is ma	Yes	fn-111	mb-01011	ax-1001111	ku-01	ss-111111101110
PID0685	Wang2016-nz	Fugra	Fg-HN-milR50		SRR2970501_1	5381200	2.41582	13	13	1	GGGGAGGUCAGGUAUGAGAUUGA	GACAGAUCAUACAUACCUCUCUUU	GGGGAGGUCAGGUAUGAGAUUGA	3	0	3	0	1 cited is ma	Yes	fn-111	mb-01011	ax-1001011	ku-01	ss-101111101100
PID0686	Wang2016-nz	Fugra	Fg-HN-milR51		SRR2970501_1	5381200	1458.41	7848	7840	0.998981	UCAAACUUUAGCGAUGUGUGA	ACACAUCGCCAAAGUUUGAGA	UCUCAAACUUUAGCGAUGUGUGA	323	119	1221	10	2 cited is not ma	Yes	fn-111	mb-01111	ax-1111011	ku-11	ss-111111111101
PID0686	Wang2016-nz	Fugra	Fg-HN-milR51		SRR3055827_1	4434060	298.372	1323	1315	0.993953	UCAAACUUUAGCGAUGUGUGA	ACACAUCGCCAAAGUUUGAGA	UCUCAAACUUUAGCGAUGUGUGA	83	32	215	1	2 cited is not ma	Yes	fn-111	mb-01111	ax-1111011	ku-11	ss-111111111101
PID0689	Wang2016-nz	Fugra	Fg-HN-milR54		SRR3055827_1	4434060	2.93185	13	12	0.923077	UAGCAGAAAAGUUGACCUCUUA	AGCGGCCAAUUUUUCUGGUAC	UAGCAGAAAAGUUGACCUCUUA	7	0	7	0	1 cited is ma	Yes	fn-111	mb-01011	ax-1011111	ku-01	ss-111111101110
PID0689	Wang2016-nz	Fugra	Fg-HN-milR54		SRR2970501_1	5381200	0.371664	2	2	1	UAGCAGAAAAGUUGACCUCUUA	AGCGGCCAAUUUUUCUGGUAC	UAGCAGAAAAGUUGACCUCUUA	1	0	1	0	1 cited is ma	No	fn-011	mb-01011	ax-1011111	ku-01	ss-110111101110
PID0690	Wang2016-nz	Fugra	Fg-HN-milR55		SRR3055827_1	4434060	2.25527	10	7	0.7	AAGCUAUUGCUGUCAUCGUCGU	GUCGGCUGCAGCUGUAAUCGCGUUG	AAGCUAUUGCUGUCAUCGUCGU	5	0	5	0	1 cited is ma	No	fn-101	mb-01011	ax-1001011	ku-01	ss-101110101110
PID0690	Wang2016-nz	Fugra	Fg-HN-milR55		SRR2970501_1	5381200	0.557496	3	3	1	AUUGCUGUCAUCGUCGUCAUCUUCGUCGGC	GUCGGCUGCAGCUGUAAUCGCGUUG	AAGCUAUUGCUGUCAUCGUCGU	0	0	2	0	3 cited not expressed	No	fn-011	mb-00010	ax-1001001	ku-01	ss-101011101110
PID0691	Wang2016-nz	Fugra	Fg-HN-milR56		SRR2970501_1	5381200	8.73411	47	23	0.489362	AGAAGUGUUUUGGAAUGUCUUUG	AAGAUUGAUUCUAGGACUUUUUCA	GAGGAGAAGUGUUUUGGAAUGU	0	0	3	0	3 cited not expressed	No	fn-101	mb-01011	ax-1011011	ku-01	ss-101110011100
PID0691	Wang2016-nz	Fugra	Fg-HN-milR56		SRR3055827_1	4434060	8.11897	36	28	0.777778	GAGGAGAAGUGUUUUGGAAUGU	UGAUUCUAGGACUUUUUCAAAGU	GAGGAGAAGUGUUUUGGAAUGU	6	0	6	0	1 cited is ma	No	fn-101	mb-01111	ax-1001011	ku-01	ss-101110101100
PID0692	Wang2016-nz	Fugra	Fg-HN-milR57		SRR2970501_1	5381200	71.3595	384	285	0.742188	AGGGGGAAGAAAUAGUAGAA	CUGGCUCAUCUUCCCCUGGA	AGGGGGAAGAAAUAGUAGAA	29	0	29	0	1 cited is ma	No	fn-101	mb-01011	ax-1001011	ku-01	ss-101110101100
PID0692	Wang2016-nz	Fugra	Fg-HN-milR57		SRR3055827_1	4434060	52.0967	231	175	0.757576	AGGAACAGAGGAGCAGAAUGC	CUGGCUCAUCUUCCCCUGGA	AGGGGGAAGAAAUAGUAGAA	4	0	13	0	2 cited is not ma	No	fn-101	mb-00010	ax-1001011	ku-01	ss-101110101100
PID0693	Wang2016-nz	Fugra	Fg-HN-milR58		SRR2970501_1	5381200	90.8719	489	458	0.936605	GUUACGAUCUGCUGAGGG	CUCUCAGCGUGGCAA	UGUUGUUACGAUCUGCUGAG	7	0	37	0	2 cited is not ma	Yes	fn-111	mb-01011	ax-1011001	ku-01	ss-101011111100
PID0693	Wang2016-nz	Fugra	Fg-HN-milR58		SRR3055827_1	4434060	67.6581	300	293	0.976667	GUUACGAUCUGCUGAGGGU	CCUCUCAGCGUGGCAA	UGUUGUUACGAUCUGCUGAG	2	0	31	0	2 cited is not ma	Yes	fn-111	mb-01011	ax-1011001	ku-01	ss-101011111000
PID0695	Wang2016-nz	Fugra	Fg-HN-milR60		SRR2970501_1	5381200	41.6264	224	219	0.977679	GGCAGCAUUGUUGACAGGGCC	UUCGUUCAACGAUAUUGUCAG	GGCAGCAUUGUUGACAGGGCC	15	0	15	0	1 cited is ma	Yes	fn-111	mb-01011	ax-1010011	ku-01	ss-101101111100
PID0695	Wang2016-nz	Fugra	Fg-HN-milR60		SRR3055827_1	4434060	45.1054	200	179	0.895	GGCAGCAUUGUUGACAGGGCCUU	GGUUCGUUCAACGAUAUUGUCAG	GGCAGCAUUGUUGACAGGGCC	11	0	13	0	2 cited is not ma	Yes	fn-111	mb-01011	ax-1010011	ku-01	ss-101101111100
PID0704	Wang2016-nz	Fugra	Fg-JS-milR9		SRR2970501_1	5381200	0	0	0	NA	GAAGGACCACGA	UGGGUGUUGUGU	GAAGGACCACGA	0	0	0	0	4 locus not expressed	No	fn-001	mb-00010	ax-1001001	ku-01	ss-000010000100
PID0704	Wang2016-nz	Fugra	Fg-JS-milR9		SRR3055827_1	4434060	0	0	0	NA	GAAGGACCACGA	UGGGUGUUGUGU	GAAGGACCACGA	0	0	0	0	4 locus not expressed	No	fn-001	mb-00010	ax-1001001	ku-01	ss-000010000100
PID0721	Wang2016-nz	Fugra	Fg-JS-milR26		SRR2970501_1	5381200	0	0	0	NA	GGAGCAGAGGGC	GAUCUUGUGCAA	GGAGCAGAGGGC	0	0	0	0	4 locus not expressed	No	fn-001	mb-01010	ax-1001001	ku-01	ss-000010001100
PID0721	Wang2016-nz	Fugra	Fg-JS-milR26		SRR3055827_1	4434060	0	0	0	NA	GGAGCAGAGGGC	GAUCUUGUGCAA	GGAGCAGAGGGC	0	0	0	0	4 locus not expressed	No	fn-001	mb-01010	ax-1001001	ku-01	ss-000010001100
PID0734	Wang2016-nz	Fugra	Fg-JS-milR39		SRR3055827_1	4434060	0.451054	2	2	1	UGGAGAAGAGGAGAAAGGCAAUG	AUGACUAACGGCAUC	GGAGAAGAGGAGAAAG	0	0	1	0	3 cited not expressed	No	fn-011	mb-01110	ax-1001011	ku-01	ss-110111101000
PID0734	Wang2016-nz	Fugra	Fg-JS-milR39		SRR2970501_1	5381200	0	0	0	NA	GGAGAAGAGGAGAAAG	ACGGCAU	GGAGAAGAGGAGAAAG	0	0	0	0	4 locus not expressed	No	fn-001	mb-00010	ax-1001001	ku-01	ss-000010001000
PID0738	Wang2016-nz	Fugra	Fg-JS-milR43		SRR3055827_1	4434060	4.51054	20	11	0.55	UGCGAAUCUGAAGACAAAACCA	GAUGUCGAAUCGCAGA	GGGAAGAAGAAGACGG	0	0	2	0	3 cited not expressed	No	fn-101	mb-01011	ax-1001011	ku-01	ss-101110101000
PID0738	Wang2016-nz	Fugra	Fg-JS-milR43		SRR2970501_1	5381200	3.53081	19	10	0.526316	ACGAAGGUCGGGAUCGUCGGGAU	AAGUUAACCUAAUUACUU	GGGAAGAAGAAGACGG	0	0	2	0	3 cited not expressed	No	fn-001	mb-00010	ax-1001011	ku-01	ss-111110101000
PID0748	Wang2016-nz	Fugra	Fg-JS-milR53		SRR2970501_1	5381200	0.185832	1	1	1	UAAGACUGAGUGGGAAGUCGA	UCCUGCGACCUG	GAGACAGAGGAAGA	0	0	1	0	3 cited not expressed	No	fn-011	mb-00010	ax-1011111	ku-01	ss-110111111110
PID0748	Wang2016-nz	Fugra	Fg-JS-milR53		SRR3055827_1	4434060	0.451054	2	1	0.5	AGGAACUCUACACUAAGACUGA	UCCUGCGACCUG	GAGACAGAGGAAGA	0	0	1	0	3 cited not expressed	No	fn-001	mb-00010	ax-1011011	ku-01	ss-100110111100
PID0753	Wang2016-nz	Fugra	Fg-JS-milR58		SRR2970501_1	5381200	1.48666	8	7	0.875	AGGUCGGGCUGUUGGGUUGAGGAUUGGCA	UGCUUUCUUUGCGG	GCGAAGAGAGGGGG	0	0	1	0	3 cited not expressed	No	fn-011	mb-00011	ax-1011001	ku-01	ss-110011111100
PID0753	Wang2016-nz	Fugra	Fg-JS-milR58		SRR3055827_1	4434060	2.02974	9	7	0.777778	CGGCGGGAUCAUGGAGAGGGCGU	UGCUUUCUUUGCGG	GCGAAGAGAGGGGG	0	0	1	0	3 cited not expressed	No	fn-001	mb-00010	ax-1011011	ku-01	ss-100110111100
PID0755	Wang2016-nz	Fugra	Fg-JS-milR60		SRR2970501_1	5381200	0.371664	2	2	1	UGGAAGCGACGGGCAAAGCAGG	GCCCAAACUCCA	GAAGCGACGGGCAA	0	0	1	0	3 cited not expressed	No	fn-011	mb-00010	ax-1001011	ku-01	ss-100111101100
PID0755	Wang2016-nz	Fugra	Fg-JS-milR60		SRR3055827_1	4434060	0	0	0	NA	GAAGCGACGGGCAA	GCCCAAACUCCA	GAAGCGACGGGCAA	0	0	0	0	4 locus not expressed	No	fn-001	mb-01010	ax-1001001	ku-01	ss-000010001100
PID0808	Jiang2017-hp	Fuoxy	Fon_hyphae-m0001		SRR3921570	1484708	0	0	0	NA	GGUGAGAUGGCCGAGUUGGUUA	AUCAGCUGGGCGAAAAUCGCCUA	GGUGAGAUGGCCGAGUUGGUUA	0	0	0	0	4 locus not expressed	No	fn-001	mb-01011	ax-1001011	ku-01	ss-000110001100
PID0808	Jiang2017-hp	Fuoxy	Fon_hyphae-m0001		SRR3921571	1094347	0	0	0	NA	GGUGAGAUGGCCGAGUUGGUUA	AUCAGCUGGGCGAAAAUCGCCUA	GGUGAGAUGGCCGAGUUGGUUA	0	0	0	0	4 locus not expressed	No	fn-001	mb-01011	ax-1001011	ku-01	ss-000110001100
PID0809	Jiang2017-hp	Fuoxy	Fon_hyphae-m0002		SRR3921570	1484708	0	0	0	NA	UGGAUACAAGAAUAAUAUUGCAA	GCAAAAAGUAUUCGCAGGUGUGCAGA	UGGAUACAAGAAUAAUAUUGCAA	0	0	0	0	4 locus not expressed	No	fn-001	mb-01011	ax-1001011	ku-01	ss-000110001100
PID0809	Jiang2017-hp	Fuoxy	Fon_hyphae-m0002		SRR3921571	1094347	0	0	0	NA	UGGAUACAAGAAUAAUAUUGCAA	GCAAAAAGUAUUCGCAGGUGUGCAGA	UGGAUACAAGAAUAAUAUUGCAA	0	0	0	0	4 locus not expressed	No	fn-001	mb-01011	ax-1001011	ku-01	ss-000110001100
PID0810	Jiang2017-hp	Fuoxy	Fon_hyphae-m0003		SRR3921570	1484708	20.206	30	27	0.9	UAUGAAUGUAGUCCGGUCGA	GGCCGGAUUCGACAUGAU	UAUGAAUGUAGUCCGGUCGA	11	0	11	0	1 cited is ma	Yes	fn-111	mb-01111	ax-1011011	ku-01	ss-111111111110
PID0810	Jiang2017-hp	Fuoxy	Fon_hyphae-m0003		SRR3921571	1094347	31.0688	34	29	0.852941	UAUGAAUGUAGUCCGGUCGA	GGCCGGAUUCGACAUGAU	UAUGAAUGUAGUCCGGUCGA	9	0	9	0	1 cited is ma	Yes	fn-111	mb-01011	ax-1011011	ku-01	ss-111111111100
PID0811	Jiang2017-hp	Fuoxy	Fon_hyphae-m0004		SRR3921570	1484708	44253.8	65704	65704	1	UGGAUGAAUCAAGCGUGGUAUGA	GUAUCAUGCGUGAUUCAUCCAUC	UGGAUGAAUCAAGCGUGGUAUGA	34093	0	34093	0	1 cited is ma	Yes	fn-111	mb-01111	ax-1011011	ku-11	ss-111111111110
PID0811	Jiang2017-hp	Fuoxy	Fon_hyphae-m0004		SRR3921571	1094347	37863.7	41436	41436	1	UGGAUGAAUCAAGCGUGGUAUGA	GUAUCAUGCGUGAUUCAUCCAUC	UGGAUGAAUCAAGCGUGGUAUGA	22355	0	22355	0	1 cited is ma	Yes	fn-111	mb-01111	ax-1011011	ku-11	ss-111111111110
PID0812	Jiang2017-hp	Fuoxy	Fon_hyphae-m0005		SRR3921570	1484708	0	0	0	NA	UGGAUACAAGAAUAAUAUUGCAA	GCAAUAUUAUUCUUGUAUCCAAA	UGGAUACAAGAAUAAUAUUGCAA	0	0	0	0	4 locus not expressed	No	fn-001	mb-01011	ax-1011011	ku-00	ss-000110011100
PID0812	Jiang2017-hp	Fuoxy	Fon_hyphae-m0005		SRR3921571	1094347	0	0	0	NA	UGGAUACAAGAAUAAUAUUGCAA	GCAAUAUUAUUCUUGUAUCCAAA	UGGAUACAAGAAUAAUAUUGCAA	0	0	0	0	4 locus not expressed	No	fn-001	mb-01011	ax-1011011	ku-00	ss-000110011100
PID0813	Jiang2017-hp	Fuoxy	Fon_hyphae-m0006		SRR3921570	1484708	0	0	0	NA	UGGAUACAAGAAUAAUAUUGCAA	GCAAUAUUAUUCUUGUAUCCAAA	UGGAUACAAGAAUAAUAUUGCAA	0	0	0	0	4 locus not expressed	No	fn-001	mb-01011	ax-1011011	ku-00	ss-000110011100
PID0813	Jiang2017-hp	Fuoxy	Fon_hyphae-m0006		SRR3921571	1094347	0	0	0	NA	UGGAUACAAGAAUAAUAUUGCAA	GCAAUAUUAUUCUUGUAUCCAAA	UGGAUACAAGAAUAAUAUUGCAA	0	0	0	0	4 locus not expressed	No	fn-001	mb-01011	ax-1011011	ku-00	ss-000110011100
PID0814	Jiang2017-hp	Fuoxy	Fon_hyphae-m0007		SRR3921570	1484708	108.439	161	154	0.956522	GAUUUGAGUCGUGCGGAGAA	CUUCGCUUGAUGAGGUCGU	GAUUUGAGUCGUGCGGAGAA	32	0	32	0	1 cited is ma	Yes	fn-111	mb-01111	ax-1011011	ku-11	ss-101111111100
PID0814	Jiang2017-hp	Fuoxy	Fon_hyphae-m0007		SRR3921571	1094347	21.9309	24	23	0.958333	GAUUUGAGUCGUGCGGAGAA	CUUCGCUUGAUGAGGUCGU	GAUUUGAGUCGUGCGGAGAA	6	0	6	0	1 cited is ma	Yes	fn-111	mb-01011	ax-1011011	ku-01	ss-101111111100
PID0817	Jiang2017-hp	Fuoxy	Fon_hyphae-m0010		SRR3921570	1484708	10.103	15	15	1	CCGGGACGGUAGGGGUCGGGGC	UGCUGCUCUUGCUGCCCGGUUU	CCGGGACGGUAGGGGUCGGGGC	6	0	6	0	1 cited is ma	Yes	fn-111	mb-01011	ax-1011011	ku-01	ss-111111111110
PID0817	Jiang2017-hp	Fuoxy	Fon_hyphae-m0010		SRR3921571	1094347	1.82757	2	2	1	CGAAAGGGAGACGGUUCAACA	CCAAACCCGCGUCCAUAUCG	CCGGGACGGUAGGGGUCGGGGC	0	0	1	0	3 cited not expressed	Yes	fn-111	mb-00010	ax-1001011	ku-01	ss-100111101000
PID0819	Jiang2017-hp	Fuoxy	Fon_hyphae-m0012		SRR3921570	1484708	28.9619	43	43	1	AGGGCAGAGGGAGGAGGGGA	CCCCAUCUUUUGCCCCGC	AGGGCAGAGGGAGGAGGGGA	26	0	26	0	1 cited is ma	Yes	fn-111	mb-01011	ax-1010011	ku-01	ss-111101111010
PID0819	Jiang2017-hp	Fuoxy	Fon_hyphae-m0012		SRR3921571	1094347	0.913787	1	1	1	AGGGCAGAGGGAGGAGGGGA	CCCCAUCUUUUGCCCCGC	AGGGCAGAGGGAGGAGGGGA	1	0	1	0	1 cited is ma	Yes	fn-111	mb-01011	ax-1010111	ku-01	ss-110101111010
PID0821	Jiang2017-hp	Fuoxy	Fon_hyphae-m0014		SRR3921570	1484708	169.057	251	246	0.98008	UUAGGGUUAGGGUUAGGGUUA	CCCUUACCCCUUAACCCUAUC	UUAGGGUUAGGGUUAGGGUUA	80	0	80	0	1 cited is ma	Yes	fn-111	mb-01011	ax-1011011	ku-11	ss-111111111110
PID0821	Jiang2017-hp	Fuoxy	Fon_hyphae-m0014		SRR3921571	1094347	54.8272	60	55	0.916667	UUAGGGUUAGGGUUAGGGUUA	CCCUUACCCCUUAACCCUAUC	UUAGGGUUAGGGUUAGGGUUA	12	0	12	0	1 cited is ma	Yes	fn-111	mb-01011	ax-1011011	ku-01	ss-111111111110
PID0822	Jiang2017-hp	Fuoxy	Fon_hyphae-m0015		SRR3921570	1484708	0	0	0	NA	GGUGAGAUGGCCGAGUUGGUUA	AUCAAGCCAGCCAUCUUCACUUA	GGUGAGAUGGCCGAGUUGGUUA	0	0	0	0	4 locus not expressed	No	fn-001	mb-01011	ax-1011011	ku-01	ss-000110001100
PID0822	Jiang2017-hp	Fuoxy	Fon_hyphae-m0015		SRR3921571	1094347	0	0	0	NA	GGUGAGAUGGCCGAGUUGGUUA	AUCAAGCCAGCCAUCUUCACUUA	GGUGAGAUGGCCGAGUUGGUUA	0	0	0	0	4 locus not expressed	No	fn-001	mb-01011	ax-1011011	ku-01	ss-000110001100
PID0825	Jiang2017-hp	Fuoxy	Fon_microconidia-m0001		SRR3921570	1484708	0	0	0	NA	UCGUUUGAUGAGGUCGUGGUA	GGAUGAGCCUCAUCCAGCGAUU	UCGUUUGAUGAGGUCGUGGUA	0	0	0	0	4 locus not expressed	No	fn-001	mb-01011	ax-1001011	ku-01	ss-000110001100
PID0825	Jiang2017-hp	Fuoxy	Fon_microconidia-m0001		SRR3921571	1094347	0	0	0	NA	UCGUUUGAUGAGGUCGUGGUA	GGAUGAGCCUCAUCCAGCGAUU	UCGUUUGAUGAGGUCGUGGUA	0	0	0	0	4 locus not expressed	No	fn-001	mb-01011	ax-1001011	ku-01	ss-000110001100
PID0826	Jiang2017-hp	Fuoxy	Fon_microconidia-m0002		SRR3921571	1094347	6.39651	7	7	1	AAGAAAACUUCUGACGUUGGAC	UAGAUGUCCUAAGUUUUCUUGC	AAGAAAACUUCUGACGUUGGAC	4	0	4	0	1 cited is ma	Yes	fn-111	mb-01011	ax-1001011	ku-01	ss-101111101110
PID0826	Jiang2017-hp	Fuoxy	Fon_microconidia-m0002		SRR3921570	1484708	0	0	0	NA	AAGAAAACUUCUGACGUUGGAC	UAGAUGUCCUAAGUUUUCUUGC	AAGAAAACUUCUGACGUUGGAC	0	0	0	0	4 locus not expressed	No	fn-001	mb-01011	ax-1001011	ku-01	ss-000110001100
PID0827	Jiang2017-hp	Fuoxy	Fon_microconidia-m0003		SRR3921570	1484708	0	0	0	NA	UGGAUACAAGAAUAAUAUUGCAA	GCAAAAAGUAUUCGCAGGUGUGCAGA	UGGAUACAAGAAUAAUAUUGCAA	0	0	0	0	4 locus not expressed	No	fn-001	mb-01011	ax-1001011	ku-01	ss-000110001100
PID0827	Jiang2017-hp	Fuoxy	Fon_microconidia-m0003		SRR3921571	1094347	0	0	0	NA	UGGAUACAAGAAUAAUAUUGCAA	GCAAAAAGUAUUCGCAGGUGUGCAGA	UGGAUACAAGAAUAAUAUUGCAA	0	0	0	0	4 locus not expressed	No	fn-001	mb-01011	ax-1001011	ku-01	ss-000110001100
PID0828	Jiang2017-hp	Fuoxy	Fon_microconidia-m0004		SRR3921571	1094347	21.9309	24	24	1	GGGUAGAGCUCUUUCGUGGCGUA	CGCCCCUGAAGGAGCGAUGCCCUU	CGCCCCUGAAGGAGCGAUGCCCUU	0	12	12	0	3 cited not expressed	Yes	fn-111	mb-01111	ax-1011111	ku-01	ss-111111111110
PID0828	Jiang2017-hp	Fuoxy	Fon_microconidia-m0004		SRR3921570	1484708	0	0	0	NA	CGCCCCUGAAGGAGCGAUGCCCUU	GGGUAGAGCUCUUUCGUGGCGUA	CGCCCCUGAAGGAGCGAUGCCCUU	0	0	0	0	4 locus not expressed	No	fn-001	mb-01011	ax-1011011	ku-01	ss-000110011100
PID0829	Jiang2017-hp	Fuoxy	Fon_microconidia-m0005		SRR3921571	1094347	16.4482	18	16	0.888889	AGGCUCAUGGAAUUGCGGCAU	UCCACAUCCAGAGCCAUGG	AGGCUCAUGGAAUUGCGGCAU	8	0	8	0	1 cited is ma	Yes	fn-111	mb-01011	ax-1011011	ku-01	ss-111111111100
PID0829	Jiang2017-hp	Fuoxy	Fon_microconidia-m0005		SRR3921570	1484708	3.36767	5	0	0	AGGCUCAUGGAAUUGCGGCAU	UCCACAUCCAGAGCCAUGG	AGGCUCAUGGAAUUGCGGCAU	0	0	0	0	3 cited not expressed	No	fn-001	mb-01011	ax-1011011	ku-01	ss-100111011100
PID0831	Jiang2017-hp	Fuoxy	Fon_microconidia-m0007		SRR3921570	1484708	44253.8	65704	65704	1	UGGAUGAAUCAAGCGUGGUAUGA	GUAUCAUGCGUGAUUCAUCCAUC	UGGAUGAAUCAAGCGUGGUAUGA	34093	0	34093	0	1 cited is ma	Yes	fn-111	mb-01111	ax-1011011	ku-11	ss-111111111110
PID0831	Jiang2017-hp	Fuoxy	Fon_microconidia-m0007		SRR3921571	1094347	37863.7	41436	41436	1	UGGAUGAAUCAAGCGUGGUAUGA	GUAUCAUGCGUGAUUCAUCCAUC	UGGAUGAAUCAAGCGUGGUAUGA	22355	0	22355	0	1 cited is ma	Yes	fn-111	mb-01111	ax-1011011	ku-11	ss-111111111110
PID0832	Jiang2017-hp	Fuoxy	Fon_microconidia-m0008		SRR3921571	1094347	8.22408	9	9	1	CAGGGAAGAGAUCGUCCGGGC	UCGGAGAAUUUCCUGGGU	CAGGGAAGAGAUCGUCCGGGC	6	0	6	0	1 cited is ma	Yes	fn-111	mb-01111	ax-1011011	ku-01	ss-111111111110
PID0832	Jiang2017-hp	Fuoxy	Fon_microconidia-m0008		SRR3921570	1484708	1.34707	2	2	1	AGAAUUUCCUGGGUCGUUG	AGGCCAGGGAAGAGAUCGUCC	CAGGGAAGAGAUCGUCCGGGC	0	0	1	0	3 cited not expressed	Yes	fn-111	mb-01011	ax-1011001	ku-01	ss-100011111100
PID0833	Jiang2017-hp	Fuoxy	Fon_microconidia-m0009		SRR3921570	1484708	0	0	0	NA	UGGAUACAAGAAUAAUAUUGCAA	GCAAUAUUAUUCUUGUAUCCAAA	UGGAUACAAGAAUAAUAUUGCAA	0	0	0	0	4 locus not expressed	No	fn-001	mb-01011	ax-1011011	ku-00	ss-000110011100
PID0833	Jiang2017-hp	Fuoxy	Fon_microconidia-m0009		SRR3921571	1094347	0	0	0	NA	UGGAUACAAGAAUAAUAUUGCAA	GCAAUAUUAUUCUUGUAUCCAAA	UGGAUACAAGAAUAAUAUUGCAA	0	0	0	0	4 locus not expressed	No	fn-001	mb-01011	ax-1011011	ku-00	ss-000110011100
PID0834	Jiang2017-hp	Fuoxy	Fon_microconidia-m0010		SRR3921570	1484708	0	0	0	NA	UGGAUACAAGAAUAAUAUUGCAA	GCAAUAUUAUUCUUGUAUCCAAA	UGGAUACAAGAAUAAUAUUGCAA	0	0	0	0	4 locus not expressed	No	fn-001	mb-01011	ax-1011011	ku-00	ss-000110011100
PID0834	Jiang2017-hp	Fuoxy	Fon_microconidia-m0010		SRR3921571	1094347	0	0	0	NA	UGGAUACAAGAAUAAUAUUGCAA	GCAAUAUUAUUCUUGUAUCCAAA	UGGAUACAAGAAUAAUAUUGCAA	0	0	0	0	4 locus not expressed	No	fn-001	mb-01011	ax-1011011	ku-00	ss-000110011100
PID0835	Jiang2017-hp	Fuoxy	Fon_microconidia-m0011		SRR3921571	1094347	0.913787	1	1	1	ACCGAAGAGUGGUGUAGUGGUA	CCACUACACCACUCUUCGGUUU	ACCGAAGAGUGGUGUAGUGGUA	0	0	0	0	3 cited not expressed	No	fn-011	mb-01011	ax-1011011	ku-01	ss-110111111100
PID0835	Jiang2017-hp	Fuoxy	Fon_microconidia-m0011		SRR3921570	1484708	0	0	0	NA	ACCGAAGAGUGGUGUAGUGGUA	CCACUACACCACUCUUCGGUUU	ACCGAAGAGUGGUGUAGUGGUA	0	0	0	0	4 locus not expressed	No	fn-001	mb-01011	ax-1011011	ku-01	ss-000110011100
PID0836	Jiang2017-hp	Fuoxy	Fon_microconidia-m0012		SRR3921571	1094347	22.8447	25	24	0.96	ACCGAAGAGUGGUGUAGUGGUA	CCACUGCACCACUCUUCGUUUUUGC	ACCGAAGAGUGGUGUAGUGGUA	9	0	9	0	1 cited is ma	Yes	fn-111	mb-01011	ax-1011111	ku-01	ss-111111101110
PID0836	Jiang2017-hp	Fuoxy	Fon_microconidia-m0012		SRR3921570	1484708	23.5737	35	34	0.971429	ACCGAAGAGUGGUGUAGUGGUA	CCACUGCACCACUCUUCGUUUUUGC	ACCGAAGAGUGGUGUAGUGGUA	8	0	8	0	1 cited is ma	Yes	fn-111	mb-01011	ax-1011011	ku-01	ss-101111101100
PID0841	Jiang2017-hp	Fuoxy	Fon_microconidia-m0017		SRR3921570	1484708	169.057	251	246	0.98008	UUAGGGUUAGGGUUAGGGUUA	CCCUUACCCCUUAACCCUAUC	UAGGGUUAGGGUUAGGGUUA	39	0	80	0	2 cited is not ma	Yes	fn-111	mb-01011	ax-1011011	ku-11	ss-111111111110
PID0841	Jiang2017-hp	Fuoxy	Fon_microconidia-m0017		SRR3921571	1094347	54.8272	60	55	0.916667	UUAGGGUUAGGGUUAGGGUUA	CCCUUACCCCUUAACCCUAUC	UAGGGUUAGGGUUAGGGUUA	9	0	12	0	2 cited is not ma	Yes	fn-111	mb-01011	ax-1011011	ku-01	ss-111111111110
PID0842	Jiang2017-hp	Fuoxy	Fon_microconidia-m0018		SRR3921571	1094347	9.13787	10	10	1	CACGUUGGACGUUGGGGGCGGC	CACCCCGUCGAACCAGCGACAG	CACGUUGGACGUUGGGGGCGGC	7	0	7	0	1 cited is ma	Yes	fn-111	mb-01011	ax-1001011	ku-01	ss-101111101110
PID0842	Jiang2017-hp	Fuoxy	Fon_microconidia-m0018		SRR3921570	1484708	0	0	0	NA	CACGUUGGACGUUGGGGGCGGC	CACCCCGUCGAACCAGCGACAG	CACGUUGGACGUUGGGGGCGGC	0	0	0	0	4 locus not expressed	No	fn-001	mb-01011	ax-1001011	ku-01	ss-000110001100
PID0843	Jiang2017-hp	Fuoxy	Fon_microconidia-m0019		SRR3921571	1094347	7.3103	8	8	1	AGCGUUUGAAGAUUCGUUGGAC	UCAGAGAAUCGUCAAACGCAAG	AGCGUUUGAAGAUUCGUUGGAC	5	0	5	0	1 cited is ma	Yes	fn-111	mb-01011	ax-1011111	ku-01	ss-111111111110
PID0843	Jiang2017-hp	Fuoxy	Fon_microconidia-m0019		SRR3921570	1484708	0	0	0	NA	AGCGUUUGAAGAUUCGUUGGAC	UCAGAGAAUCGUCAAACGCAAG	AGCGUUUGAAGAUUCGUUGGAC	0	0	0	0	4 locus not expressed	No	fn-001	mb-01011	ax-1011011	ku-01	ss-000110011100
PID0844	Jiang2017-hp	Fuoxy	Fon_microconidia-m0020		SRR3921571	1094347	9.13787	10	8	0.8	UGUAAUUCAUGAUCAGGCGGAC	CGCCAUUUUGGAUUGCGAC	UGUAAUUCAUGAUCAGGCGGAC	4	0	4	0	1 cited is ma	No	fn-101	mb-01011	ax-1011011	ku-01	ss-101110111110
PID0844	Jiang2017-hp	Fuoxy	Fon_microconidia-m0020		SRR3921570	1484708	0	0	0	NA	UGUAAUUCAUGAUCAGGCGGAC	CGCCAUUUUGGAUUGCGAC	UGUAAUUCAUGAUCAGGCGGAC	0	0	0	0	4 locus not expressed	No	fn-001	mb-01011	ax-1011011	ku-01	ss-000110011100
PID0845	Jiang2017-hp	Fuoxy	Fon_microconidia-m0021		SRR3921571	1094347	12.793	14	14	1	GCUUGGAUAAGUGAUCGUCGGCC	UGGAUGACGCUUUGUAAACGAGUGG	GCUUGGAUAAGUGAUCGUCGGCC	2	0	2	0	1 cited is ma	Yes	fn-111	mb-01011	ax-1001011	ku-01	ss-101111101100
PID0845	Jiang2017-hp	Fuoxy	Fon_microconidia-m0021		SRR3921570	1484708	0	0	0	NA	GCUUGGAUAAGUGAUCGUCGGCC	UGGAUGACGCUUUGUAAACGAGUGG	GCUUGGAUAAGUGAUCGUCGGCC	0	0	0	0	4 locus not expressed	No	fn-001	mb-01011	ax-1001011	ku-01	ss-000110001100
PID0846	Jiang2017-hp	Fuoxy	Fon_microconidia-m0022		SRR3921571	1094347	38.3791	42	42	1	ACGGACUGGGUGGAGAGGCGGC	UCGUCGAUAGACACCCCUCCGUAC	ACGGACUGGGUGGAGAGGCGGC	13	0	13	0	1 cited is ma	Yes	fn-111	mb-01011	ax-1001011	ku-01	ss-101111101100
PID0846	Jiang2017-hp	Fuoxy	Fon_microconidia-m0022		SRR3921570	1484708	0	0	0	NA	ACGGACUGGGUGGAGAGGCGGC	UCGUCGAUAGACACCCCUCCGUAC	ACGGACUGGGUGGAGAGGCGGC	0	0	0	0	4 locus not expressed	No	fn-001	mb-01011	ax-1001011	ku-01	ss-000110001100
PID0847	Wang2017-md	Pustr	pst-milR1		SRR5078242	5567024	4125.54	22967	22357	0.97344	UAAGGAGUGGUAAAGGAAGG	UGUAAUAGUUUACCAGUGAUUGCC	UAAGGAGUGGUAAAGGAAGG	7786	11	7786	11	1 cited is ma	Yes	fn-111	mb-11111	ax-1101011	ku-11	ss-111111101001
PID0848	Lau2018-av	Cocin	cci-milR-1		SRR7403498	15824105	11.3751	180	180	1	CCCUGGAUGGUGUGGGAGUUGCU	CGACUCUCAAUGCCGUCCAGUU	CUGGAUGGUGUGGGAGUUGCU	21	0	25	0	2 cited is not ma	Yes	fn-111	mb-01011	ax-1011011	ku-01	ss-111111111100
PID0848	Lau2018-av	Cocin	cci-milR-1		SRR7403497	9130303	16.9764	155	153	0.987097	CUGGAUGGUGUGGGAGUUGCU	CGACUCUCAAUGCCGUCCAGUU	CUGGAUGGUGUGGGAGUUGCU	42	0	42	0	1 cited is ma	Yes	fn-111	mb-01011	ax-1011011	ku-01	ss-111111111100
PID0848	Lau2018-av	Cocin	cci-milR-1		SRR7403494	10252669	3.31621	34	34	1	CUGGAUGGUGUGGGAGUUGCU	CGACUCUCAAUGCCGUCCAGUU	CUGGAUGGUGUGGGAGUUGCU	11	0	11	0	1 cited is ma	Yes	fn-111	mb-01111	ax-1011011	ku-01	ss-101111111100
PID0848	Lau2018-av	Cocin	cci-milR-1		SRR7403495	8894137	8.09522	72	72	1	CCCUGGAUGGUGUGGGAGUUGCU	CGACUCUCAAUGCCGUCCAGUU	CUGGAUGGUGUGGGAGUUGCU	11	0	19	0	2 cited is not ma	Yes	fn-111	mb-01011	ax-1011011	ku-01	ss-111111111100
PID0848	Lau2018-av	Cocin	cci-milR-1		SRR7403496	8708259	14.6987	128	128	1	CUGGAUGGUGUGGGAGUUGCU	CGACUCUCAAUGCCGUCCAGUU	CUGGAUGGUGUGGGAGUUGCU	31	0	31	0	1 cited is ma	Yes	fn-111	mb-01011	ax-1011011	ku-01	ss-101111111100
PID0848	Lau2018-av	Cocin	cci-milR-1		SRR7403493	7729539	3.62247	28	27	0.964286	CCCUGGAUGGUGUGGGAGUUGCU	CGACUCUCAAUGCCGUCCAGUU	CUGGAUGGUGUGGGAGUUGCU	3	0	6	0	2 cited is not ma	Yes	fn-111	mb-01011	ax-1011011	ku-01	ss-101111111100
PID0851	Lau2018-av	Cocin	cci-milR-4	a	SRR7403494	10252669	4.48664	46	42	0.913043	UUUGCGGUGAUGACUGACGU	GUCAGUCAAAGCCGCAGACC	UUUGCGGUGAUGACUGACGU	20	0	20	0	1 cited is ma	Yes	fn-111	mb-01011	ax-1011011	ku-01	ss-111111111110
PID0851	Lau2018-av	Cocin	cci-milR-4	a	SRR7403495	8894137	4.38491	39	35	0.897436	UUUGCGGUGAUGACUGACGU	GUCAGUCAAAGCCGCAGACC	UUUGCGGUGAUGACUGACGU	16	0	16	0	1 cited is ma	Yes	fn-111	mb-01011	ax-1011011	ku-01	ss-111111111110
PID0851	Lau2018-av	Cocin	cci-milR-4	a	SRR7403493	7729539	1.94061	15	14	0.933333	UUUGCGGUGAUGACUGACGU	GUCAGUCAAAGCCGCAGACC	UUUGCGGUGAUGACUGACGU	8	0	8	0	1 cited is ma	Yes	fn-111	mb-01011	ax-1011011	ku-01	ss-111111111110
PID0851	Lau2018-av	Cocin	cci-milR-4	a	SRR7403497	9130303	1.42383	13	11	0.846154	UUUGCGGUGAUGACUGACGU	GUCAGUCAAAGCCGCAGACC	UUUGCGGUGAUGACUGACGU	5	0	5	0	1 cited is ma	Yes	fn-111	mb-01011	ax-1011011	ku-01	ss-101111111100
PID0851	Lau2018-av	Cocin	cci-milR-4	a	SRR7403498	15824105	0.442363	7	4	0.571429	UUUGCGGUGAUGACUGACGUC	CGUCAGUCAAAGCCGCAGACC	UUUGCGGUGAUGACUGACGU	1	0	2	0	2 cited is not ma	No	fn-001	mb-01011	ax-1011011	ku-01	ss-111110111110
PID0851	Lau2018-av	Cocin	cci-milR-4	a	SRR7403496	8708259	1.7225	15	11	0.733333	GCGGUGAUGACUGACG	UCAGUCAAAGCCGCAG	UUUGCGGUGAUGACUGACGU	1	0	2	0	2 cited is not ma	No	fn-101	mb-01011	ax-1011001	ku-01	ss-101010111100
PID0852	Lau2018-av	Cocin	cci-milR-4	b	SRR7403498	15824105	96.4983	1527	1269	0.831041	UCAGUCAUCACCGCAAACCAGCU	UUUUGCGGUGAUGACUGACG	UCAGUCAUCACCGCAAACCA	0	10	522	0	3 cited not expressed	Yes	fn-111	mb-00011	ax-1011011	ku-11	ss-111111111110
PID0852	Lau2018-av	Cocin	cci-milR-4	b	SRR7403496	8708259	120.231	1047	727	0.694365	UCAGUCAUCACCGCAAACCAGCU	UUUUGCGGUGAUGACUGACG	UCAGUCAUCACCGCAAACCA	2	17	171	0	2 cited is not ma	No	fn-101	mb-00111	ax-1011011	ku-01	ss-101110111110
PID0852	Lau2018-av	Cocin	cci-milR-4	b	SRR7403495	8894137	295.588	2629	1576	0.599467	UUUGCGGUGAUGACUGACGU	GUCAGUCAUCACCGCAAACC	UCAGUCAUCACCGCAAACCA	10	25	753	0	2 cited is not ma	No	fn-101	mb-01011	ax-1011011	ku-11	ss-111110111110
PID0852	Lau2018-av	Cocin	cci-milR-4	b	SRR7403493	7729539	281	2172	1328	0.611418	UUUGCGGUGAUGACUGACGU	GUCAGUCAUCACCGCAAACC	UCAGUCAUCACCGCAAACCA	9	15	702	0	2 cited is not ma	No	fn-101	mb-01011	ax-1011011	ku-11	ss-111110111110
PID0852	Lau2018-av	Cocin	cci-milR-4	b	SRR7403494	10252669	288.023	2953	1707	0.578056	UUUGCGGUGAUGACUGACGU	GUCAGUCAUCACCGCAAACC	UCAGUCAUCACCGCAAACCA	12	11	951	0	2 cited is not ma	No	fn-101	mb-01011	ax-1011011	ku-11	ss-111110111110
PID0852	Lau2018-av	Cocin	cci-milR-4	b	SRR7403497	9130303	122.449	1118	759	0.678891	UUUGCGGUGAUGACUGACGU	GUCAGUCAUCACCGCAAACC	UCAGUCAUCACCGCAAACCA	6	10	188	0	2 cited is not ma	No	fn-101	mb-01111	ax-1011011	ku-11	ss-101110111100
PID0854	Lau2018-av	Cocin	cci-milR-6		SRR7403496	8708259	198.777	1731	1553	0.897169	UCUUGACGUUCGUUGUGACU	ACGGGUAGGGACGUACU	CAUCUGUCCUUCCCGCUGC	0	0	179	0	3 cited not expressed	Yes	fn-111	mb-00010	ax-1011011	ku-11	ss-101111111100
PID0854	Lau2018-av	Cocin	cci-milR-6		SRR7403497	9130303	176.117	1608	1440	0.895522	UCUUGACGUUCGUUGUGACU	ACGGGUAGGGACGUACU	CAUCUGUCCUUCCCGCUGC	0	0	212	0	3 cited not expressed	Yes	fn-111	mb-00010	ax-1011011	ku-11	ss-101111111100
PID0854	Lau2018-av	Cocin	cci-milR-6		SRR7403494	10252669	310.456	3183	2945	0.925228	UCUUGACGUUCGUUGUGACU	ACGGGUAGGGACGUACU	CAUCUGUCCUUCCCGCUGC	0	0	490	0	3 cited not expressed	Yes	fn-111	mb-00010	ax-1011011	ku-11	ss-101111111100
PID0854	Lau2018-av	Cocin	cci-milR-6		SRR7403495	8894137	263.544	2344	2162	0.922355	UCUUGACGUUCGUUGUGACU	ACGGGUAGGGACGUACU	CAUCUGUCCUUCCCGCUGC	0	0	328	0	3 cited not expressed	Yes	fn-111	mb-00010	ax-1011011	ku-11	ss-101111111100
PID0854	Lau2018-av	Cocin	cci-milR-6		SRR7403493	7729539	296.137	2289	2136	0.933159	UCUUGACGUUCGUUGUGACU	ACGGGUAGGGACGUACU	CAUCUGUCCUUCCCGCUGC	0	0	414	0	3 cited not expressed	Yes	fn-111	mb-00010	ax-1011011	ku-11	ss-101111111100
PID0854	Lau2018-av	Cocin	cci-milR-6		SRR7403498	15824105	86.2608	1365	1233	0.903297	UCUUGACGUUCGUUGUGACU	ACGGGUAGGGACGUACU	CAUCUGUCCUUCCCGCUGC	0	0	163	0	3 cited not expressed	Yes	fn-111	mb-00010	ax-1011011	ku-01	ss-101111111100
PID0855	Lau2018-av	Cocin	cci-milR-7		SRR7403495	8894137	296.937	2641	183	0.0692919	UGUUAUCGAGAACCUUUCCU	GAACCUCUUGAUAGCUCG	UCUUCCGAACCUCUUGAUAGCU	0	0	18	0	3 cited not expressed	No	fn-101	mb-01011	ax-1011011	ku-01	ss-111111001100
PID0855	Lau2018-av	Cocin	cci-milR-7		SRR7403498	15824105	283.239	4482	163	0.0363677	UCAGCCUGUUAUCGAGAACCUU	CUCUUGAUAGCUCGCCAGUU	UCUUCCGAACCUCUUGAUAGCU	0	0	14	0	3 cited not expressed	No	fn-101	mb-01011	ax-1001011	ku-01	ss-111111001100
PID0855	Lau2018-av	Cocin	cci-milR-7		SRR7403496	8708259	223.351	1945	127	0.0652956	UCAGCCUGUUAUCGAGAACCUU	CUCUUGAUAGCUCGCCAGUU	UCUUCCGAACCUCUUGAUAGCU	0	0	10	0	3 cited not expressed	No	fn-101	mb-01011	ax-1001011	ku-01	ss-111111001100
PID0855	Lau2018-av	Cocin	cci-milR-7		SRR7403497	9130303	207.879	1898	116	0.061117	UCAGCCUGUUAUCGAGAACCUU	CUCUUGAUAGCUCGCCAGUU	UCUUCCGAACCUCUUGAUAGCU	0	0	11	0	3 cited not expressed	No	fn-101	mb-01011	ax-1001011	ku-01	ss-111111001100
PID0855	Lau2018-av	Cocin	cci-milR-7		SRR7403494	10252669	318.064	3261	153	0.0469181	UCAGCCUGUUAUCGAGAACCUU	CUCUUGAUAGCUCGCCAGUU	UCUUCCGAACCUCUUGAUAGCU	0	0	10	0	3 cited not expressed	No	fn-101	mb-01011	ax-1001011	ku-01	ss-111111001100
PID0855	Lau2018-av	Cocin	cci-milR-7		SRR7403493	7729539	406.493	3142	155	0.0493316	UCAGCCUGUUAUCGAGAACCUU	CUCUUGAUAGCUCGCCAGUU	UCUUCCGAACCUCUUGAUAGCU	0	0	19	0	3 cited not expressed	No	fn-101	mb-01011	ax-1001011	ku-01	ss-111111001100
PID0856	Lau2018-av	Cocin	cci-milR-8		SRR7403498	15824105	68.1239	1078	706	0.654917	UGGCACUUUGAUUUUGACCUCU	GGGCAUGCGCGAAAGAAUCGA	CUGACUUCUGCCAGCCAUUCU	0	0	106	0	3 cited not expressed	No	fn-101	mb-01010	ax-1001011	ku-01	ss-111110101000
PID0856	Lau2018-av	Cocin	cci-milR-8		SRR7403493	7729539	97.2891	752	511	0.679521	UUAUGAAAUGGCACUUUGAUU	GCGAAAGAAUCGAGAUG	CUGACUUCUGCCAGCCAUUCU	0	0	46	0	3 cited not expressed	No	fn-101	mb-01010	ax-1001011	ku-01	ss-111110101000
PID0856	Lau2018-av	Cocin	cci-milR-8		SRR7403496	8708259	81.6466	711	387	0.544304	UGGCACUUUGAUUUUGACCUCU	GGGCAUGCGCGAAAGAAUCGA	CUGACUUCUGCCAGCCAUUCU	0	0	25	0	3 cited not expressed	No	fn-101	mb-01010	ax-1001011	ku-01	ss-101110101000
PID0856	Lau2018-av	Cocin	cci-milR-8		SRR7403497	9130303	74.8058	683	359	0.525622	UGGCACUUUGAUUUUGACCUCU	GGGCAUGCGCGAAAGAAUCGA	CUGACUUCUGCCAGCCAUUCU	0	0	34	0	3 cited not expressed	No	fn-101	mb-01010	ax-1001011	ku-01	ss-101110101000
PID0856	Lau2018-av	Cocin	cci-milR-8		SRR7403494	10252669	76.0778	780	496	0.635897	UGGCACUUUGAUUUUGACCUCU	GGGCAUGCGCGAAAGAAUCGA	CUGACUUCUGCCAGCCAUUCU	0	0	37	0	3 cited not expressed	No	fn-101	mb-01010	ax-1001011	ku-01	ss-101110101000
PID0856	Lau2018-av	Cocin	cci-milR-8		SRR7403495	8894137	98.9416	880	526	0.597727	UAUGAAAUGGCACUUUGAUU	GCGAAAGAAUCGAGAU	CUGACUUCUGCCAGCCAUUCU	0	0	23	0	3 cited not expressed	No	fn-101	mb-01010	ax-1001011	ku-01	ss-101110101000
PID0857	Lau2018-av	Cocin	cci-milR-9		SRR7403498	15824105	318.944	5047	5047	1	UGCUUGGACUUCUAUGGC	AACGGAUCCAAGCAAA	UGCUUGGACUUCUAUGGC	697	1	697	1	1 cited is ma	Yes	fn-111	mb-01111	ax-1111001	ku-11	ss-101011111101
PID0857	Lau2018-av	Cocin	cci-milR-9		SRR7403496	8708259	744.006	6479	6479	1	UGCUUGGACUUCUAUGGC	AACGGAUCCAAGCAAA	UGCUUGGACUUCUAUGGC	2141	9	2141	9	1 cited is ma	Yes	fn-111	mb-01011	ax-1111001	ku-11	ss-101011111101
PID0857	Lau2018-av	Cocin	cci-milR-9		SRR7403497	9130303	695.048	6346	6346	1	UGCUUGGACUUCUAUGGC	AACGGAUCCAAGCAAA	UGCUUGGACUUCUAUGGC	2174	4	2174	4	1 cited is ma	Yes	fn-111	mb-01011	ax-1111001	ku-11	ss-101011111101
PID0857	Lau2018-av	Cocin	cci-milR-9		SRR7403494	10252669	853.631	8752	8752	1	UGCUUGGACUUCUAUGGC	AACGGAUCCAAGCAAA	UGCUUGGACUUCUAUGGC	2320	3	2320	3	1 cited is ma	Yes	fn-111	mb-01011	ax-1111001	ku-11	ss-101011111101
PID0857	Lau2018-av	Cocin	cci-milR-9		SRR7403495	8894137	552.499	4914	4914	1	UGCUUGGACUUCUAUGGC	AACGGAUCCAAGCAAA	UGCUUGGACUUCUAUGGC	1354	5	1354	5	1 cited is ma	Yes	fn-111	mb-01011	ax-1111001	ku-11	ss-101011111101
PID0857	Lau2018-av	Cocin	cci-milR-9		SRR7403493	7729539	737.301	5699	5699	1	UGCUUGGACUUCUAUGGCU	CAACGGAUCCAAGCAAA	UGCUUGGACUUCUAUGGC	1074	5	1177	2	2 cited is not ma	Yes	fn-111	mb-01011	ax-1111001	ku-11	ss-101011111111
PID0858	Lau2018-av	Cocin	cci-milR-10		SRR7403498	15824105	1199.31	18978	18973	0.999737	UAAGUGGGAGCUU	AUACCACUACCU	GUGAAAAGACAUAGAGGGUGUAGA	9	0	2190	0	2 cited is not ma	Yes	fn-111	mb-01011	ax-1011001	ku-11	ss-101011101000
PID0858	Lau2018-av	Cocin	cci-milR-10		SRR7403496	8708259	2531.73	22047	22033	0.999365	UAAGUGGGAGCUU	AUACCACUACCU	GUGAAAAGACAUAGAGGGUGUAGA	8	1	4435	0	2 cited is not ma	Yes	fn-111	mb-01011	ax-1011001	ku-11	ss-101011101000
PID0858	Lau2018-av	Cocin	cci-milR-10		SRR7403497	9130303	2737.04	24990	24977	0.99948	UAAGUGGGAGCUU	AUACCACUACCU	GUGAAAAGACAUAGAGGGUGUAGA	12	0	6110	0	2 cited is not ma	Yes	fn-111	mb-01011	ax-1011001	ku-11	ss-101011101000
PID0858	Lau2018-av	Cocin	cci-milR-10		SRR7403495	8894137	2984.44	26544	26539	0.999812	UAAGUGGGAGCUU	AUACCACUACCU	GUGAAAAGACAUAGAGGGUGUAGA	11	1	9429	0	2 cited is not ma	Yes	fn-111	mb-01011	ax-1011001	ku-11	ss-101011101000
PID0858	Lau2018-av	Cocin	cci-milR-10		SRR7403494	10252669	14540.9	149083	149080	0.99998	AGGGUGUAGAAUAAGUGGGAGCUU	AUACCACUACCUUUA	GUGAAAAGACAUAGAGGGUGUAGA	1	0	42100	0	2 cited is not ma	Yes	fn-111	mb-01010	ax-1001011	ku-11	ss-101111101000
PID0858	Lau2018-av	Cocin	cci-milR-10		SRR7403493	7729539	18679.8	144386	144380	0.999958	AGGGUGUAGAAUAAGUGGGAGCUU	AUACCACUACCUUUA	GUGAAAAGACAUAGAGGGUGUAGA	1	0	52361	0	2 cited is not ma	Yes	fn-111	mb-01010	ax-1001011	ku-11	ss-101111101000
PID0859	Lau2018-av	Cocin	cci-milR-11		SRR7403494	10252669	190.194	1950	1606	0.82359	UGGUGAGAUGGAAAAGUGAC		GAAAAGUGACGGCUCAUCCC	0	0	122	0	3 cited not expressed	Yes	fn-111	mb-00010	ax-0011010	ku-01	ss-101111111100
PID0859	Lau2018-av	Cocin	cci-milR-11		SRR7403495	8894137	219.92	1956	1543	0.788855	UGGUGAGAUGGAAAAGUGAC		GAAAAGUGACGGCUCAUCCC	0	0	77	0	3 cited not expressed	No	fn-101	mb-00010	ax-0011010	ku-01	ss-101110111100
PID0859	Lau2018-av	Cocin	cci-milR-11		SRR7403493	7729539	178.665	1381	1088	0.787835	UGGUGAGAUGGAAAAGUGAC		GAAAAGUGACGGCUCAUCCC	0	0	63	0	3 cited not expressed	No	fn-101	mb-00010	ax-0011010	ku-01	ss-101110111100
PID0859	Lau2018-av	Cocin	cci-milR-11		SRR7403498	15824105	89.9893	1424	965	0.677669	UUCGACCUGCGAGUUACUGGU	UGGUGAGGAGGGUUGAAG	GAAAAGUGACGGCUCAUCCC	0	0	36	0	3 cited not expressed	No	fn-101	mb-01011	ax-1011011	ku-01	ss-111110111100
PID0859	Lau2018-av	Cocin	cci-milR-11		SRR7403496	8708259	151.81	1322	934	0.706505	UGCGAGUUACUGGUGAGAUG		GAAAAGUGACGGCUCAUCCC	0	0	45	0	3 cited not expressed	No	fn-101	mb-00010	ax-0011010	ku-01	ss-101110111100
PID0859	Lau2018-av	Cocin	cci-milR-11		SRR7403497	9130303	126.94	1159	840	0.724763	UCGAGAGAGAUAGAGCUGGU		GAAAAGUGACGGCUCAUCCC	0	0	45	0	3 cited not expressed	No	fn-101	mb-00010	ax-0011010	ku-01	ss-101110111100
PID0860	Lau2018-av	Cocin	cci-milR-12	a	SRR7403496	8708259	397.439	3461	3380	0.976596	UGUUGGAAGUCGGGUACUCU	AUUGACACGGCUGGG	AUUGACACGGCUGGGCUUUU	0	1	221	0	3 cited not expressed	Yes	fn-111	mb-01011	ax-1011011	ku-11	ss-101111111000
PID0860	Lau2018-av	Cocin	cci-milR-12	a	SRR7403497	9130303	372.058	3397	3315	0.975861	UGUUGGAAGUCGGGUACUCU	AUUGACACGGCUGGG	AUUGACACGGCUGGGCUUUU	0	0	219	0	3 cited not expressed	Yes	fn-111	mb-01011	ax-1011011	ku-11	ss-101111111000
PID0860	Lau2018-av	Cocin	cci-milR-12	a	SRR7403494	10252669	425.743	4365	4243	0.97205	UGUUGGAAGUCGGGUACUCU	AUUGACACGGCUGGG	AUUGACACGGCUGGGCUUUU	0	1	396	0	3 cited not expressed	Yes	fn-111	mb-01011	ax-1011011	ku-11	ss-101111111000
PID0860	Lau2018-av	Cocin	cci-milR-12	a	SRR7403495	8894137	364.847	3245	3143	0.968567	UGUUGGAAGUCGGGUACUCU	AUUGACACGGCUGGG	AUUGACACGGCUGGGCUUUU	0	1	261	0	3 cited not expressed	Yes	fn-111	mb-01011	ax-1011011	ku-11	ss-101111111000
PID0860	Lau2018-av	Cocin	cci-milR-12	a	SRR7403493	7729539	437.93	3385	3290	0.971935	UGUUGGAAGUCGGGUACUCU	AUUGACACGGCUGGG	AUUGACACGGCUGGGCUUUU	0	1	299	0	3 cited not expressed	Yes	fn-111	mb-01011	ax-1011011	ku-11	ss-101111111000
PID0860	Lau2018-av	Cocin	cci-milR-12	a	SRR7403498	15824105	308.58	4883	4808	0.984641	UUUAACAUCGGAAUUGACGGU	UGGCCUGUUGGAAGUCGGGUACUCU	AUUGACACGGCUGGGCUUUU	0	6	479	0	3 cited not expressed	Yes	fn-111	mb-00010	ax-1001011	ku-11	ss-101111101000
PID0861	Lau2018-av	Cocin	cci-milR-12	b	SRR7403498	15824105	1086	17185	5093	0.296363	UGUCUGGUACCGUUAGAAAGCU	GACAGGUUUAGCUAUCAGC	UGAGUAGAAUGGUCCCUGUCCC	7	0	302	0	2 cited is not ma	No	fn-101	mb-00111	ax-1010011	ku-01	ss-111100011100
PID0861	Lau2018-av	Cocin	cci-milR-12	b	SRR7403493	7729539	1461.92	11300	3338	0.295398	UGUCUGGUACCGUUAGAAAGCU	GACAGGUUUAGCUAUCAGC	UGAGUAGAAUGGUCCCUGUCCC	2	0	202	0	2 cited is not ma	No	fn-101	mb-00111	ax-1010011	ku-11	ss-101100011100
PID0861	Lau2018-av	Cocin	cci-milR-12	b	SRR7403497	9130303	1207.41	11024	3431	0.31123	UGUCUGGUACCGUUAGAAAGCU	GACAGGUUUAGCUAUCAGC	UGAGUAGAAUGGUCCCUGUCCC	0	0	150	0	3 cited not expressed	No	fn-101	mb-00111	ax-1010011	ku-01	ss-101100011100
PID0861	Lau2018-av	Cocin	cci-milR-12	b	SRR7403494	10252669	1304.83	13378	3761	0.281133	UGUCUGGUACCGUUAGAAAGCU	GACAGGUUUAGCUAUCAGC	UGAGUAGAAUGGUCCCUGUCCC	2	0	157	0	2 cited is not ma	No	fn-101	mb-00111	ax-1010011	ku-01	ss-101100011100
PID0861	Lau2018-av	Cocin	cci-milR-12	b	SRR7403495	8894137	1108.03	9855	2861	0.290309	UGGUACCGUUAGAAAGCUCU	GACAGGUUUAGCUAUCAGC	UGAGUAGAAUGGUCCCUGUCCC	3	0	128	0	2 cited is not ma	No	fn-101	mb-00111	ax-1010011	ku-01	ss-101100011100
PID0861	Lau2018-av	Cocin	cci-milR-12	b	SRR7403496	8708259	1307.84	11389	3746	0.328914	UUUGGUAUUCCAGUACUCGAC	GACAGGUUUAGCUAUCAGC	UGAGUAGAAUGGUCCCUGUCCC	7	0	138	0	2 cited is not ma	No	fn-101	mb-00011	ax-1010011	ku-01	ss-101100011100
PID0862	Lau2018-av	Cocin	cci-milR-12	c	SRR7403496	8708259	467.832	4074	4064	0.997545	GCGCCGUUGAAAUACCACUACC	UGGGGAGUUUGGCUG	GGCGCCGUUGAAAUACCACUACCUUU	0	0	357	0	3 cited not expressed	Yes	fn-111	mb-01011	ax-1011011	ku-11	ss-101111101000
PID0862	Lau2018-av	Cocin	cci-milR-12	c	SRR7403497	9130303	402.396	3674	3656	0.995101	GCGCCGUUGAAAUACCACUACC	UGGGGAGUUUGGCUG	GGCGCCGUUGAAAUACCACUACCUUU	0	0	262	0	3 cited not expressed	Yes	fn-111	mb-01011	ax-1011011	ku-11	ss-101111101000
PID0862	Lau2018-av	Cocin	cci-milR-12	c	SRR7403495	8894137	635.925	5656	5644	0.997878	GCGCCGUUGAAAUACCACUACC	UGGGGAGUUUGGCUG	GGCGCCGUUGAAAUACCACUACCUUU	0	0	1012	0	3 cited not expressed	Yes	fn-111	mb-01011	ax-1011011	ku-11	ss-101111101000
PID0862	Lau2018-av	Cocin	cci-milR-12	c	SRR7403494	10252669	4539.21	46539	46531	0.999828	UUUACUUAUUCAAUGAGGCGGA	CAGGUGGGGAGUUUGGCUG	GGCGCCGUUGAAAUACCACUACCUUU	0	0	8237	0	3 cited not expressed	Yes	fn-111	mb-00011	ax-1011011	ku-11	ss-111111101000
PID0862	Lau2018-av	Cocin	cci-milR-12	c	SRR7403493	7729539	6046.29	46735	46727	0.999829	UUUUACUUAUUCAAUGAGGCGGA	CAGGUGGGGAGUUUGGCUG	GGCGCCGUUGAAAUACCACUACCUUU	1	0	8960	0	2 cited is not ma	Yes	fn-111	mb-00011	ax-1011011	ku-11	ss-111111101000
PID0862	Lau2018-av	Cocin	cci-milR-12	c	SRR7403498	15824105	101.744	1610	1605	0.996894	GUCCCACCUUUUGGCUUCAAGGUCAUU	CAGGUGGGGAGUUUGGCUG	GGCGCCGUUGAAAUACCACUACCUUU	0	0	151	0	3 cited not expressed	Yes	fn-111	mb-00011	ax-1001001	ku-01	ss-101011101000
PID0865	Lau2018-av	Cocin	cci-milR-13	c	SRR7403494	10252669	1251.67	12833	12831	0.999844	GCGCCGUUGAAAUACCACUACC	CACUACCUUUAUUGUCUUUUUACUUA	UGUGAAAAGACAUAGAGGGUGUAGAA	0	0	6071	0	3 cited not expressed	Yes	fn-111	mb-00010	ax-1001011	ku-11	ss-111111101010
PID0865	Lau2018-av	Cocin	cci-milR-13	c	SRR7403493	7729539	1845	14261	14259	0.99986	GCGCCGUUGAAAUACCACUACC	CACUACCUUUAUUGUCUUUUUACUUA	UGUGAAAAGACAUAGAGGGUGUAGAA	0	0	6371	0	3 cited not expressed	Yes	fn-111	mb-00010	ax-1001011	ku-11	ss-111111101010
PID0865	Lau2018-av	Cocin	cci-milR-13	c	SRR7403495	8894137	410.27	3649	3645	0.998904	GCGCCGUUGAAAUACCACUACC	CACUACCUUUAUUGUCUUUUUACUUA	UGUGAAAAGACAUAGAGGGUGUAGAA	0	0	1035	0	3 cited not expressed	Yes	fn-111	mb-00010	ax-1001011	ku-11	ss-111111101000
PID0865	Lau2018-av	Cocin	cci-milR-13	c	SRR7403496	8708259	327.276	2850	2848	0.999298	GCGCCGUUGAAAUACCACUACC	CACUACCUUUAUUGUCUUUUUACUUA	UGUGAAAAGACAUAGAGGGUGUAGAA	0	0	311	0	3 cited not expressed	Yes	fn-111	mb-00010	ax-1001011	ku-11	ss-101111101000
PID0865	Lau2018-av	Cocin	cci-milR-13	c	SRR7403497	9130303	270.09	2466	2462	0.998378	GCGCCGUUGAAAUACCACUACC	CACUACCUUUAUUGUCUUUUUACUUA	UGUGAAAAGACAUAGAGGGUGUAGAA	0	0	288	0	3 cited not expressed	Yes	fn-111	mb-00010	ax-1001011	ku-11	ss-101111101000
PID0865	Lau2018-av	Cocin	cci-milR-13	c	SRR7403498	15824105	1499.67	23731	23720	0.999536	GCGCCGUUGAAAUACCACUACCU	CACUACCUUUAUUGUCUUUUUACUUA	UGUGAAAAGACAUAGAGGGUGUAGAA	0	2	1917	0	3 cited not expressed	Yes	fn-111	mb-00011	ax-1001011	ku-11	ss-101111101000
PID0868	Wang2018-by	Trrub	Tru-novel-miRNA-1		SRR7630468	21330676	6.46956	138	99	0.717391	UACCAGACCAACUCCACACCCCU	GGGUUUGGUUUGGUUUGGUAUA	UACCAGACCAACUCCACACCCCU	15	0	15	0	1 cited is ma	No	fn-101	mb-01011	ax-1011011	ku-01	ss-111110101100
PID0868	Wang2018-by	Trrub	Tru-novel-miRNA-1		SRR7630467	18237318	2.08364	38	13	0.342105	UACCAGACCAACUCCACACCCCU	GGGUUUGGUUUGGUUUGGUAUA	UACCAGACCAACUCCACACCCCU	1	0	1	0	1 cited is ma	No	fn-001	mb-01011	ax-1011011	ku-01	ss-110110001100
PID0869	Wang2018-by	Trrub	Tru-novel-miRNA-2		SRR7630468	21330676	1.35954	29	25	0.862069	ACAUGUGUCUGUAGUGUUUUU	AGACGAUUGCAGAUCGUAA	ACAUGUGUCUGUAGUGUUUU	1	0	6	0	2 cited is not ma	Yes	fn-111	mb-01011	ax-1011011	ku-01	ss-101111111100
PID0869	Wang2018-by	Trrub	Tru-novel-miRNA-2		SRR7630467	18237318	26.9228	491	145	0.295316	ACAUGUGUCUGUAGUGUUUU	GACGAUUGCAGAUCGUAA	ACAUGUGUCUGUAGUGUUUU	11	0	11	0	1 cited is ma	No	fn-101	mb-01011	ax-1011011	ku-01	ss-101110011100
PID0870	Wang2018-by	Trrub	Tru-novel-miRNA-3		SRR7630467	18237318	0.383828	7	6	0.857143	UGUAUAUCCCGGGACUUUGU	UGGUUGAUCGGGAUU	UGAUCGGGAUUCCUCACGGUAU	0	0	1	0	3 cited not expressed	No	fn-011	mb-00111	ax-1001011	ku-01	ss-100111101000
PID0870	Wang2018-by	Trrub	Tru-novel-miRNA-3		SRR7630468	21330676	0.468808	10	4	0.4	UGAUCGGGAUUCCUCACGGUAU	GGUUUAAGGAAUGUAUAUCCCGGGAC	UGAUCGGGAUUCCUCACGGUAU	2	0	2	0	1 cited is ma	No	fn-001	mb-00110	ax-1001011	ku-01	ss-101110001100
PID0871	Wang2018-by	Trrub	Tru-novel-miRNA-4		SRR7630467	18237318	0.0548326	1	0	0	UAGGCCUCCUGGCUCUCGAU	CGACGAUACUGGAGCCCGGCU	UAGGCCUCCUGGCUCUCGAU	0	0	0	0	3 cited not expressed	No	fn-001	mb-01011	ax-1001011	ku-01	ss-100111001100
PID0871	Wang2018-by	Trrub	Tru-novel-miRNA-4		SRR7630468	21330676	0.890736	19	14	0.736842	UUGGUGAACUCCCGGUAGGCCUCCUGGCU	CGACGAUACUGGAGCCCGGCU	UAGGCCUCCUGGCUCUCGAU	0	0	2	0	3 cited not expressed	No	fn-001	mb-00110	ax-1001001	ku-01	ss-101010101100
PID0872	Wang2018-by	Trrub	Tru-novel-miRNA-5		SRR7630468	21330676	1.73459	37	37	1	CGACUGUGGCCAUGGAAGU	UAGCGGUGGUUACGGGCGAG	CGACUGUGGCCAUGGAAGU	8	0	8	0	1 cited is ma	Yes	fn-111	mb-01011	ax-1011001	ku-01	ss-101011111100
PID0872	Wang2018-by	Trrub	Tru-novel-miRNA-5		SRR7630467	18237318	2.8513	52	49	0.942308	CGACUGUGGCCAU	GGUUACGGGCGAG	CGACUGUGGCCAUGGAAGU	3	0	4	0	2 cited is not ma	No	fn-011	mb-01011	ax-1011001	ku-01	ss-101011111100
PID0873	Wang2018-by	Trrub	Tru-novel-miRNA-6		SRR7630468	21330676	10.8295	231	55	0.238095	UGCUUGAGAGUCACCGGAGA	UUAGUCACGUGGUCACAUCAAC	UGCUUGAGAGUCACCGGAGAC	1	0	4	0	2 cited is not ma	No	fn-101	mb-01011	ax-1001011	ku-01	ss-111110001100
PID0873	Wang2018-by	Trrub	Tru-novel-miRNA-6		SRR7630467	18237318	0.657991	12	0	0	UGCUUGAGAGUCACCGGAGAC	UUUAGUCACGUGGUCACAUCAAC	UGCUUGAGAGUCACCGGAGAC	0	0	0	0	3 cited not expressed	No	fn-001	mb-01011	ax-1001011	ku-01	ss-100111001100
PID0874	Wang2018-by	Trrub	Tru-novel-miRNA-7		SRR7630467	18237318	9.54088	174	172	0.988506	GAGCGCUUUCUUGAUC	GUAGAUUGCGCACCUG	GAGCGCUUUCUUGAUCUUG	0	0	51	0	3 cited not expressed	Yes	fn-111	mb-01011	ax-1001001	ku-01	ss-101011101110
PID0874	Wang2018-by	Trrub	Tru-novel-miRNA-7		SRR7630468	21330676	0.0937617	2	2	1	GAGCGCUUUCUUGAUCUU	AGUAGAUUGCGCACCUG	GAGCGCUUUCUUGAUCUUG	0	0	1	0	3 cited not expressed	No	fn-011	mb-01011	ax-1001001	ku-01	ss-100011101100
PID0875	Wang2018-by	Trrub	Tru-novel-miRNA-8		SRR7630468	21330676	0.56257	12	6	0.5	AUCGGAGCGAUGCGAGACAUAGC	UGUGUAUGGAUGUAUCGUGAAGGUAA	AUCGGAGCGAUGCGAGACAUAGC	2	0	2	0	1 cited is ma	No	fn-001	mb-01011	ax-1001011	ku-01	ss-101110001100
PID0875	Wang2018-by	Trrub	Tru-novel-miRNA-8		SRR7630467	18237318	0.109665	2	0	0	AUCGGAGCGAUGCGAGACAUAGC	UGUGUAUGGAUGUAUCGUGAAGGUAA	AUCGGAGCGAUGCGAGACAUAGC	0	0	0	0	3 cited not expressed	No	fn-001	mb-01011	ax-1001011	ku-01	ss-100111001100
PID0876	Wang2018-by	Trrub	Tru-novel-miRNA-9		SRR7630468	21330676	1422.88	30351	4895	0.16128	UCUGCAGCGAGCUUCCAUAUCA	CGGGCUGUCAAUCUGCAGCG	UGCUCCUGCUCCUGCUCGGU	53	0	195	0	2 cited is not ma	No	fn-101	mb-00010	ax-1001011	ku-01	ss-111111001100
PID0876	Wang2018-by	Trrub	Tru-novel-miRNA-9		SRR7630467	18237318	279.427	5096	636	0.124804	UCUGCAGCGAGCUUCCAUAUCAG	CGGGCUGUCAAUCUGCAGCG	UGCUCCUGCUCCUGCUCGGU	3	1	22	0	2 cited is not ma	No	fn-101	mb-00010	ax-1001011	ku-01	ss-101111001100
PID0877	Wang2018-by	Trrub	Tru-novel-miRNA-10		SRR7630468	21330676	11.4389	244	35	0.143443	UCAGAGAGCGAGCGCCUACCC	UGGGCUGGUCGCUUUGGUUGAAC	UGAGCCAAAAGAGCGAGCCCACA	0	0	3	0	3 cited not expressed	No	fn-001	mb-00110	ax-1001011	ku-01	ss-111111001100
PID0877	Wang2018-by	Trrub	Tru-novel-miRNA-10		SRR7630467	18237318	2.5223	46	8	0.173913	UGAGCCAAAAGAGCGAGCCCACA	UGGGCUGGUCGCUUUGGUUGAAC	UGAGCCAAAAGAGCGAGCCCACA	1	0	1	0	1 cited is ma	No	fn-001	mb-01011	ax-1001011	ku-01	ss-100111001100
PID0878	Wang2018-by	Trrub	Tru-novel-miRNA-11		SRR7630467	18237318	0.0548326	1	1	1	GAAGGCAGCAGU		UGGCUUGAAAUUCGGGAACCAGC	0	0	1	0	3 cited not expressed	No	fn-011	mb-00010	ax-0001100	ku-01	ss-100011101010
PID0878	Wang2018-by	Trrub	Tru-novel-miRNA-11		SRR7630468	21330676	0.140643	3	1	0.333333	UGGCUUGAAAUUCGGGAACCAGC		UGGCUUGAAAUUCGGGAACCAGC	0	0	0	0	3 cited not expressed	No	fn-001	mb-00010	ax-0001010	ku-01	ss-100110001000
PID0879	Wang2018-by	Trrub	Tru-novel-miRNA-12		SRR7630468	21330676	0.421928	9	6	0.666667	UGGUGAUUGGGCUGGAUAGAC	CGGUAUGUCGGGA	UGGUGAUUGGGCUGGAUAGAC	2	0	2	0	1 cited is ma	No	fn-001	mb-00110	ax-1001011	ku-01	ss-101110101000
PID0879	Wang2018-by	Trrub	Tru-novel-miRNA-12		SRR7630467	18237318	0.109665	2	1	0.5	UGGUGAUUGGGCUGGAUAGAC	CGGUAUGUCGGGA	UGGUGAUUGGGCUGGAUAGAC	0	0	0	0	3 cited not expressed	No	fn-001	mb-00010	ax-1001011	ku-01	ss-100110101000
PID0880	Zeng2018-ds	Fugra	FgmilR-7dps-87		SRR6516242	7570166	878.052	6647	6646	0.99985	CCUCUCCGGACCUCGAAACCC	GGUUUCGAGGCGAGGAGAGGUU	UCCUCUCCGGACCUCGAAACCC	95	0	3360	3	2 cited is not ma	Yes	fn-111	mb-01011	ax-1111111	ku-11	ss-111111101111
PID0880	Zeng2018-ds	Fugra	FgmilR-7dps-87		SRR6516244	1335037	485.38	648	648	1	CCUCUCCGGACCUCGAAACCC	GGUUUCGAGGCGAGGAGAGGUU	UCCUCUCCGGACCUCGAAACCC	12	0	252	1	2 cited is not ma	Yes	fn-111	mb-01011	ax-1111111	ku-11	ss-111111101111
PID0880	Zeng2018-ds	Fugra	FgmilR-7dps-87		SRR6516245	6699886	159.853	1071	1071	1	CCUCUCCGGACCUCGAAACCC	GGUUUCGAGGCGAGGAGAGGUU	UCCUCUCCGGACCUCGAAACCC	19	0	274	1	2 cited is not ma	Yes	fn-111	mb-01011	ax-1111011	ku-11	ss-111111101111
PID0880	Zeng2018-ds	Fugra	FgmilR-7dps-87		SRR6516243	8555307	306.009	2618	2618	1	CCUCUCCGGACCUCGAAACCC	GGUUUCGAGGCGAGGAGAGGUU	UCCUCUCCGGACCUCGAAACCC	9	8	722	7	2 cited is not ma	Yes	fn-111	mb-01011	ax-1111011	ku-11	ss-111111101111
PID0881	Zeng2018-ds	Fugra	FgmilR-7dps-106		SRR6516242	7570166	1209.35	9155	9155	1	UGAUAAAUUGGUGUUGGUUG	UCCAGCGCCAAUUUAUCAUC	UGAUAAAUUGGUGUUGGUUG	3590	0	3590	0	1 cited is ma	Yes	fn-111	mb-01111	ax-1011011	ku-11	ss-111111111100
PID0881	Zeng2018-ds	Fugra	FgmilR-7dps-106		SRR6516243	8555307	758.944	6493	6493	1	UGAUAAAUUGGUGUUGGUUG	UCCAGCGCCAAUUUAUCAUC	UGAUAAAUUGGUGUUGGUUG	3613	0	3613	0	1 cited is ma	Yes	fn-111	mb-01011	ax-1011011	ku-11	ss-111111111110
PID0881	Zeng2018-ds	Fugra	FgmilR-7dps-106		SRR6516245	6699886	1.49256	10	8	0.8	UGAUAAAUUGGUGUUGGUUG	UCCAGCGCCAAUUUAUCAUC	UGAUAAAUUGGUGUUGGUUG	6	0	6	0	1 cited is ma	No	fn-101	mb-01011	ax-1011011	ku-01	ss-111110111110
PID0881	Zeng2018-ds	Fugra	FgmilR-7dps-106		SRR6516244	1335037	3.74521	5	5	1	UGAUAAAUUGGUGUUGGUUG	UCCAGCGCCAAUUUAUCAUC	UGAUAAAUUGGUGUUGGUUG	2	0	2	0	1 cited is ma	Yes	fn-111	mb-01011	ax-1011011	ku-01	ss-111111111100
PID0882	Zeng2018-ds	Fugra	FgmilR-7dps-108		SRR6516242	7570166	1430.88	10832	10828	0.999631	UCAGAGCGGUGAUUGAUCAAGAU	CUUGUCAAUUAUCGGUCUGAUC	UCAGAGCGGUGAUUGAUCAAGAUU	1737	1742	2812	1	2 cited is not ma	Yes	fn-111	mb-01111	ax-1111011	ku-11	ss-111111111111
PID0882	Zeng2018-ds	Fugra	FgmilR-7dps-108		SRR6516243	8555307	11565.8	98949	98948	0.99999	UCAGAGCGGUGAUUGAUCAAGAUU	UCUUGUCAAUUAUCGGUCUGAUC	UCAGAGCGGUGAUUGAUCAAGAUU	30682	1328	30682	1328	1 cited is ma	Yes	fn-111	mb-11111	ax-1111011	ku-11	ss-111111111101
PID0882	Zeng2018-ds	Fugra	FgmilR-7dps-108		SRR6516245	6699886	15.3734	103	103	1	UCAGAGCGGUGAUUGAUCAAGAUU	UCUUGUCAAUUAUCGGUCUGAUC	UCAGAGCGGUGAUUGAUCAAGAUU	25	1	25	1	1 cited is ma	Yes	fn-111	mb-01111	ax-1111011	ku-01	ss-111111111101
PID0882	Zeng2018-ds	Fugra	FgmilR-7dps-108		SRR6516244	1335037	4.49426	6	6	1	UCAGAGCGGUGAUUGAUCAAGAU	CUUGUCAAUUAUCGGUCUGAUC	UCAGAGCGGUGAUUGAUCAAGAUU	0	0	3	0	3 cited not expressed	Yes	fn-111	mb-01111	ax-1011011	ku-01	ss-111111111110
PID0884	Zeng2018-ds	Fugra	FgmilR-7dps-89		SRR6516243	8555307	173.927	1488	1352	0.908602	UGUAAAGACCUGCUGGAAUUAUA	CAAAACCUGUAGGUUGUUAUAUA	UGUCGAAGAAACUGUAAAGACC	22	0	71	0	2 cited is not ma	Yes	fn-111	mb-01111	ax-1001011	ku-01	ss-111111101100
PID0884	Zeng2018-ds	Fugra	FgmilR-7dps-89		SRR6516242	7570166	229.585	1738	1726	0.993096	UCGAAGAAACUGUAAAGACCUGC	AGGUUGUUAUAUAAUGAGUCGUUGAUA	UGUCGAAGAAACUGUAAAGACC	162	0	268	0	2 cited is not ma	Yes	fn-111	mb-01011	ax-1001011	ku-11	ss-111111101000
PID0884	Zeng2018-ds	Fugra	FgmilR-7dps-89		SRR6516245	6699886	0.149256	1	1	1	UGCUGGAAUUAUAUUUAUGAC	UUGUUAUAUAAUGAGUCGUUGAUAAA	UGUCGAAGAAACUGUAAAGACC	0	0	1	0	3 cited not expressed	No	fn-011	mb-00010	ax-1001111	ku-01	ss-110111101010
PID0884	Zeng2018-ds	Fugra	FgmilR-7dps-89		SRR6516244	1335037	0	0	0	NA	UGUCGAAGAAACUGUAAAGACC	UUGUUAUAUAAUGAGUCGUUGAUAAA	UGUCGAAGAAACUGUAAAGACC	0	0	0	0	4 locus not expressed	No	fn-001	mb-01011	ax-1001011	ku-01	ss-000110001000
PID0887	Zeng2018-ds	Fugra	FgmilR-7dps-127		SRR6516242	7570166	19.1541	145	142	0.97931	UGCGGGCGAGAGAAGAGAGAA	UUUUCAGAAAGCGAAAUGUUUCAACGGCAGU	UGCGGGCGAGAGAAGAGAGAA	82	0	82	0	1 cited is ma	Yes	fn-111	mb-01010	ax-1001011	ku-01	ss-111111101010
PID0887	Zeng2018-ds	Fugra	FgmilR-7dps-127		SRR6516245	6699886	0	0	0	NA	UGCGGGCGAGAGAAGAGAGAA	UUUUCAGAAAGCGAAAUGUUUCAACGGCAGU	UGCGGGCGAGAGAAGAGAGAA	0	0	0	0	4 locus not expressed	No	fn-001	mb-01010	ax-1001011	ku-01	ss-000110001000
PID0887	Zeng2018-ds	Fugra	FgmilR-7dps-127		SRR6516244	1335037	0	0	0	NA	UGCGGGCGAGAGAAGAGAGAA	UUUUCAGAAAGCGAAAUGUUUCAACGGCAGU	UGCGGGCGAGAGAAGAGAGAA	0	0	0	0	4 locus not expressed	No	fn-001	mb-01010	ax-1001011	ku-01	ss-000110001000
PID0887	Zeng2018-ds	Fugra	FgmilR-7dps-127		SRR6516243	8555307	0.818206	7	5	0.714286	GCGGGCGAGAGAAGAGAGAA	UUUUCAGAAAGCGAAAUGUUUCAACGGCAG	UGCGGGCGAGAGAAGAGAGAA	0	0	3	0	3 cited not expressed	No	fn-001	mb-01010	ax-1001011	ku-01	ss-111110101010
PID0889	Zeng2018-ds	Fugra	FgmilR-7dps-133		SRR6516242	7570166	20.6072	156	115	0.737179	UGAUGUGAGGUCUCUGUCUGCCU	GUAGGUAGAGCCUGAAAAUAUUAAA	UGAUGUGAGGUCUCUGUCUGCCU	71	0	71	0	1 cited is ma	No	fn-101	mb-01011	ax-1010011	ku-01	ss-111100111100
PID0889	Zeng2018-ds	Fugra	FgmilR-7dps-133		SRR6516245	6699886	0	0	0	NA	UGAUGUGAGGUCUCUGUCUGCCU	GUAGGUAGAGCCUGAAAAUAUUAAA	UGAUGUGAGGUCUCUGUCUGCCU	0	0	0	0	4 locus not expressed	No	fn-001	mb-01011	ax-1010011	ku-01	ss-000100011100
PID0889	Zeng2018-ds	Fugra	FgmilR-7dps-133		SRR6516244	1335037	0	0	0	NA	UGAUGUGAGGUCUCUGUCUGCCU	GUAGGUAGAGCCUGAAAAUAUUAAA	UGAUGUGAGGUCUCUGUCUGCCU	0	0	0	0	4 locus not expressed	No	fn-001	mb-01011	ax-1010011	ku-01	ss-000100011100
PID0889	Zeng2018-ds	Fugra	FgmilR-7dps-133		SRR6516243	8555307	8.88337	76	44	0.578947	UGCAGUCGUAUUAGAGUGUAGAUGA	AUCGCCCACUUUGGUUCAGAUUGUACC	UGAUGUGAGGUCUCUGUCUGCCU	2	0	3	0	2 cited is not ma	No	fn-101	mb-01011	ax-1010001	ku-01	ss-101000101100
PID0890	Zeng2018-ds	Fugra	FgmilR-7dps-56		SRR6516242	7570166	10.6999	81	81	1	UCGAGAACGGCGGACUGGCACUC	GGCCGGUCUGGCGAGCCUCGAUG	UCGAGAACGGCGGACUGGCACUC	33	0	33	0	1 cited is ma	Yes	fn-111	mb-01111	ax-1011011	ku-01	ss-111111111110
PID0890	Zeng2018-ds	Fugra	FgmilR-7dps-56		SRR6516245	6699886	0.447769	3	0	0	UCGAGAACGGCGGACUGGCACUC	GGCCGGUCUGGCGAGCCUCGAUG	UCGAGAACGGCGGACUGGCACUC	0	0	0	0	3 cited not expressed	No	fn-001	mb-01011	ax-1011011	ku-01	ss-110111011100
PID0890	Zeng2018-ds	Fugra	FgmilR-7dps-56		SRR6516244	1335037	0	0	0	NA	UCGAGAACGGCGGACUGGCACUC	GGCCGGUCUGGCGAGCCUCGAUG	UCGAGAACGGCGGACUGGCACUC	0	0	0	0	4 locus not expressed	No	fn-001	mb-01011	ax-1011011	ku-01	ss-000110011100
PID0890	Zeng2018-ds	Fugra	FgmilR-7dps-56		SRR6516243	8555307	0.584433	5	4	0.8	UGUCGAGAACGGCGGACUGGC	CGGUCUGGCGAGCCUCGAUGGC	UCGAGAACGGCGGACUGGCACUC	0	0	1	0	3 cited not expressed	No	fn-001	mb-01011	ax-1011011	ku-01	ss-110110101100
PID0891	Zeng2018-ds	Fugra	FgmilR-7dps-110		SRR6516244	1335037	0.749043	1	1	1	AAUUUACAUCCAUGUCGUCGACCU	CUCUGACAUCAUGCAGGCUUCA	UUACACGGAGAUCACAUAACUC	0	0	1	0	3 cited not expressed	Yes	fn-111	mb-01010	ax-1001111	ku-01	ss-110111101110
PID0891	Zeng2018-ds	Fugra	FgmilR-7dps-110		SRR6516242	7570166	20.4751	155	118	0.76129	UUACACGGAGAUCACAUAACUC	CCUAUGGGGUUUGUGUCAUC	UUACACGGAGAUCACAUAACUC	64	0	64	0	1 cited is ma	No	fn-101	mb-01111	ax-1011011	ku-01	ss-111110111100
PID0891	Zeng2018-ds	Fugra	FgmilR-7dps-110		SRR6516243	8555307	28.5203	244	48	0.196721	UUACACGGAGAUCACAUAACUC	CCUAUGGGGUUUGUGUCAUC	UUACACGGAGAUCACAUAACUC	5	0	5	0	1 cited is ma	No	fn-101	mb-01011	ax-1011011	ku-01	ss-101111011100
PID0891	Zeng2018-ds	Fugra	FgmilR-7dps-110		SRR6516245	6699886	0.298513	2	1	0.5	UUACACGGAGAUCACAUAACUC	CCUAUGGGGUUUGUGUCAUC	UUACACGGAGAUCACAUAACUC	0	0	0	0	3 cited not expressed	No	fn-001	mb-01011	ax-1011011	ku-01	ss-100110011100
PID0892	Zeng2018-ds	Fugra	FgmilR-7dps-71		SRR6516242	7570166	1.45307	11	2	0.181818	UAUGUUUGGACCGGAAGACCCAGA	UGUCGACUUGAACCAGGCGUUGAAG	UCAGCGAAGGUGUAGCAGGCAUG	0	0	2	0	3 cited not expressed	No	fn-001	mb-00010	ax-1001011	ku-01	ss-111111001100
PID0892	Zeng2018-ds	Fugra	FgmilR-7dps-71		SRR6516243	8555307	3.03905	26	11	0.423077	UGUUCAGCGAAGGUGUAGCAGGC	CGACUUGAACCAGGCGUUGAAGGC	UCAGCGAAGGUGUAGCAGGCAUG	0	0	4	0	3 cited not expressed	No	fn-001	mb-01011	ax-1001011	ku-01	ss-101110001100
PID0892	Zeng2018-ds	Fugra	FgmilR-7dps-71		SRR6516245	6699886	0	0	0	NA	UCAGCGAAGGUGUAGCAGGCAUG	UGUCGACUUGAACCAGGCGUUGAAG	UCAGCGAAGGUGUAGCAGGCAUG	0	0	0	0	4 locus not expressed	No	fn-001	mb-01011	ax-1001011	ku-01	ss-000110001100
PID0892	Zeng2018-ds	Fugra	FgmilR-7dps-71		SRR6516244	1335037	0	0	0	NA	UCAGCGAAGGUGUAGCAGGCAUG	UGUCGACUUGAACCAGGCGUUGAAG	UCAGCGAAGGUGUAGCAGGCAUG	0	0	0	0	4 locus not expressed	No	fn-001	mb-01011	ax-1001011	ku-01	ss-000110001100
PID0893	Zeng2018-ds	Fugra	FgmilR-7dps-120		SRR6516242	7570166	56.6698	429	126	0.293706	UAGGCAGUGUUGUUGCAGCUG	GUUGCUGAUGCUGUUGCUGUU	UAGGCAGUGUUGUUGCAGCUG	34	0	34	0	1 cited is ma	No	fn-101	mb-01011	ax-1011011	ku-01	ss-111110011100
PID0893	Zeng2018-ds	Fugra	FgmilR-7dps-120		SRR6516243	8555307	27.9359	239	82	0.343096	UGUUGUUGCAGCUGUUACAGUU	GUUGCUGAUGCUGUUGCUGUU	UAGGCAGUGUUGUUGCAGCUG	0	0	30	0	3 cited not expressed	No	fn-101	mb-00010	ax-1011011	ku-01	ss-111110011100
PID0893	Zeng2018-ds	Fugra	FgmilR-7dps-120		SRR6516245	6699886	0	0	0	NA	UAGGCAGUGUUGUUGCAGCUG	GUUGCUGAUGCUGUUGCUGUU	UAGGCAGUGUUGUUGCAGCUG	0	0	0	0	4 locus not expressed	No	fn-001	mb-01011	ax-1011011	ku-01	ss-000110011100
PID0893	Zeng2018-ds	Fugra	FgmilR-7dps-120		SRR6516244	1335037	0	0	0	NA	UAGGCAGUGUUGUUGCAGCUG	GUUGCUGAUGCUGUUGCUGUU	UAGGCAGUGUUGUUGCAGCUG	0	0	0	0	4 locus not expressed	No	fn-001	mb-01011	ax-1011011	ku-01	ss-000110011100
PID0898	Zeng2018-ds	Fugra	FgmilR-7dps-131		SRR6516245	6699886	0.597025	4	3	0.75	UACCCAUGUAGUUUCGAUUGU	AGUCGGAAGAUCUUGGUAAUG	UACCCAUGUAGUUUCGAUUGU	0	0	0	0	3 cited not expressed	No	fn-001	mb-01011	ax-1001011	ku-01	ss-110110101100
PID0898	Zeng2018-ds	Fugra	FgmilR-7dps-131		SRR6516243	8555307	164.576	1408	958	0.680398	UCGGAAGAUCUUGGUAAUGUGU	GCAUACCCAUGUAGUUUCGAUU	UACCCAUGUAGUUUCGAUUGU	8	0	77	0	2 cited is not ma	No	fn-101	mb-01011	ax-1001011	ku-01	ss-101110101100
PID0898	Zeng2018-ds	Fugra	FgmilR-7dps-131		SRR6516242	7570166	277.933	2104	921	0.437738	UACCCAUGUAGUUUCGAUUGUUUGAC	UUGAGUCGGAAGAUCUUGGUAAUG	UACCCAUGUAGUUUCGAUUGU	38	1	119	0	2 cited is not ma	No	fn-101	mb-01111	ax-1001001	ku-01	ss-101010001100
PID0898	Zeng2018-ds	Fugra	FgmilR-7dps-131		SRR6516244	1335037	0	0	0	NA	UACCCAUGUAGUUUCGAUUGU	AGUCGGAAGAUCUUGGUAAUG	UACCCAUGUAGUUUCGAUUGU	0	0	0	0	4 locus not expressed	No	fn-001	mb-01011	ax-1001011	ku-01	ss-000110001100
PID0899	Zeng2018-ds	Fugra	FgmilR-7dps-57		SRR6516242	7570166	20.0788	152	41	0.269737	UAGACAUAUCUCUUUCGCGGCC	UCACGACAGGGGUGAGGAGCCAAUC	UAGACAUAUCUCUUUCGCGGCC	28	0	28	0	1 cited is ma	No	fn-101	mb-01111	ax-1001011	ku-01	ss-111110001100
PID0899	Zeng2018-ds	Fugra	FgmilR-7dps-57		SRR6516243	8555307	5.37678	46	19	0.413043	UCACGACAGGGGUGAGGAGCCAAU	AGACAUAUCUCUUUCGCGGCC	UAGACAUAUCUCUUUCGCGGCC	1	1	5	0	2 cited is not ma	No	fn-101	mb-00111	ax-1001011	ku-01	ss-111110001100
PID0899	Zeng2018-ds	Fugra	FgmilR-7dps-57		SRR6516245	6699886	0	0	0	NA	UAGACAUAUCUCUUUCGCGGCC	UCACGACAGGGGUGAGGAGCCAAUC	UAGACAUAUCUCUUUCGCGGCC	0	0	0	0	4 locus not expressed	No	fn-001	mb-01011	ax-1001011	ku-01	ss-000110001100
PID0899	Zeng2018-ds	Fugra	FgmilR-7dps-57		SRR6516244	1335037	0	0	0	NA	UAGACAUAUCUCUUUCGCGGCC	UCACGACAGGGGUGAGGAGCCAAUC	UAGACAUAUCUCUUUCGCGGCC	0	0	0	0	4 locus not expressed	No	fn-001	mb-01011	ax-1001011	ku-01	ss-000110001100
PID0900	Zeng2018-ds	Fugra	FgmilR-7dps-61		SRR6516242	7570166	5.68019	43	14	0.325581	UCCUUGGACUUCUUGAUCUC	GGUCACACAGAAGUCCAUGGGAAGGGACAACAU	UCCUUGGACUUCUUGAUCUC	12	0	12	0	1 cited is ma	No	fn-100	mb-00111	ax-1001010	ku-01	ss-101110000000
PID0900	Zeng2018-ds	Fugra	FgmilR-7dps-61		SRR6516243	8555307	2.5715	22	8	0.363636	UGCUUCGCAGUCCUUGGACUUCUU	GGUCACACAGAAGUCCAUGGGAAGGGACAACAU	UCCUUGGACUUCUUGAUCUC	2	0	4	0	2 cited is not ma	No	fn-000	mb-00011	ax-1001010	ku-01	ss-111110000000
PID0900	Zeng2018-ds	Fugra	FgmilR-7dps-61		SRR6516245	6699886	0	0	0	NA	UCCUUGGACUUCUUGAUCUC	GGUCACACAGAAGUCCAUGGGAAGGGACAACAU	UCCUUGGACUUCUUGAUCUC	0	0	0	0	4 locus not expressed	No	fn-000	mb-00011	ax-1001010	ku-01	ss-000110000000
PID0900	Zeng2018-ds	Fugra	FgmilR-7dps-61		SRR6516244	1335037	0	0	0	NA	UCCUUGGACUUCUUGAUCUC	GGUCACACAGAAGUCCAUGGGAAGGGACAACAU	UCCUUGGACUUCUUGAUCUC	0	0	0	0	4 locus not expressed	No	fn-000	mb-00011	ax-1001010	ku-01	ss-000110000000
PID0901	Zeng2018-ds	Fugra	FgmilR-7dps-121		SRR6516242	7570166	13.8702	105	60	0.571429	UUUCCGAGCUGUUCAACAUCACU	UGAUUUUGAAGGGGACUGGGCCUG	UUUCCGAGCUGUUCAACAUCACU	20	0	20	0	1 cited is ma	No	fn-101	mb-01111	ax-1001011	ku-01	ss-111110101100
PID0901	Zeng2018-ds	Fugra	FgmilR-7dps-121		SRR6516243	8555307	21.8578	187	64	0.342246	UUUCCGAGCUGUUCAACAUCAC	GAUUUUGAAGGGGACUGGGCCUG	UUUCCGAGCUGUUCAACAUCACU	4	0	8	0	2 cited is not ma	No	fn-101	mb-01011	ax-1001011	ku-01	ss-101110001100
PID0901	Zeng2018-ds	Fugra	FgmilR-7dps-121		SRR6516244	1335037	0	0	0	NA	UUUCCGAGCUGUUCAACAUCACU	UGAUUUUGAAGGGGACUGGGCCUG	UUUCCGAGCUGUUCAACAUCACU	0	0	0	0	4 locus not expressed	No	fn-001	mb-01011	ax-1001011	ku-01	ss-000110001100
PID0901	Zeng2018-ds	Fugra	FgmilR-7dps-121		SRR6516245	6699886	0.298513	2	1	0.5	GGGACUGGGCCUGGGUGUACGACUCUGA	ACGUGUCGGAUCCCCAUUUCCGAGCUGU	UUUCCGAGCUGUUCAACAUCACU	0	0	1	0	3 cited not expressed	No	fn-001	mb-01011	ax-1001001	ku-01	ss-100010001100
PID0902	Zeng2018-ds	Fugra	FgmilR-7dps-21		SRR6516242	7570166	9.77521	74	56	0.756757	UAGGAACAGAGAUCAUUUGAAC	UCAUGUGAUGUCUGUCUGGC	UAGGAACAGAGAUCAUUUGAAC	15	0	15	0	1 cited is ma	No	fn-101	mb-01111	ax-1011011	ku-01	ss-101110111100
PID0902	Zeng2018-ds	Fugra	FgmilR-7dps-21		SRR6516243	8555307	4.3248	37	19	0.513514	UGCAGGGUAGGAACAGAGAUCAUU	UGAUGUCUGUCUGGCCUGACU	UAGGAACAGAGAUCAUUUGAAC	0	0	2	0	3 cited not expressed	No	fn-001	mb-01011	ax-1011011	ku-01	ss-111110111100
PID0902	Zeng2018-ds	Fugra	FgmilR-7dps-21		SRR6516245	6699886	0	0	0	NA	UAGGAACAGAGAUCAUUUGAAC	UCAUGUGAUGUCUGUCUGGC	UAGGAACAGAGAUCAUUUGAAC	0	0	0	0	4 locus not expressed	No	fn-001	mb-01011	ax-1011011	ku-01	ss-000110011100
PID0902	Zeng2018-ds	Fugra	FgmilR-7dps-21		SRR6516244	1335037	0	0	0	NA	UAGGAACAGAGAUCAUUUGAAC	UCAUGUGAUGUCUGUCUGGC	UAGGAACAGAGAUCAUUUGAAC	0	0	0	0	4 locus not expressed	No	fn-001	mb-01011	ax-1011011	ku-01	ss-000110011100
PID0903	Zeng2018-ds	Fugra	FgmilR-7dps-114		SRR6516244	1335037	177.523	237	236	0.995781	CCUUGUUCCUCUGUUUCUCU	GAGAAGCGAGGACAAGCUC	CCUUGUUCCUCUGUUUCUCUC	16	5	33	17	2 cited is not ma	Yes	fn-111	mb-11111	ax-1111011	ku-11	ss-101111111101
PID0903	Zeng2018-ds	Fugra	FgmilR-7dps-114		SRR6516245	6699886	35.2245	236	236	1	CCUUGUUCCUCUGUUUCUCU	GAGAAGCGAGGACAAGCUC	CCUUGUUCCUCUGUUUCUCUC	7	2	10	0	2 cited is not ma	Yes	fn-111	mb-01011	ax-1011011	ku-01	ss-101111111100
PID0903	Zeng2018-ds	Fugra	FgmilR-7dps-114		SRR6516242	7570166	81.1079	614	614	1	GAAGAGAAGGCGGUCGGCGC	UGAGAAGCGAGGACAAGCUC	CCUUGUUCCUCUGUUUCUCUC	21	2	97	0	2 cited is not ma	Yes	fn-111	mb-00111	ax-1011011	ku-01	ss-101111111100
PID0903	Zeng2018-ds	Fugra	FgmilR-7dps-114		SRR6516243	8555307	24.3124	208	206	0.990385	CCAACAUCGAGACUGGCGGCU	UGAGAAGCGAGGACAAGCUC	CCUUGUUCCUCUGUUUCUCUC	1	0	8	0	2 cited is not ma	Yes	fn-111	mb-00010	ax-1011011	ku-01	ss-101111111100
PID0904	Zeng2018-ds	Fugra	FgmilR-7dps-107		SRR6516242	7570166	73.3141	555	555	1	GCGAAGUAGCUACCUGAUACAUACA	UAUGCCUUAAGGGCGCCUUCGCUU	AGCGAAGUAGCUACCUGAUACA	5	0	150	1	2 cited is not ma	Yes	fn-111	mb-01011	ax-1101001	ku-01	ss-101011101111
PID0904	Zeng2018-ds	Fugra	FgmilR-7dps-107		SRR6516245	6699886	2.08959	14	14	1	AGCGAAGUAGCUACCUGAUA	UAAGGGCGCCUUCGCUUU	AGCGAAGUAGCUACCUGAUACA	1	0	7	0	2 cited is not ma	Yes	fn-111	mb-01011	ax-1001011	ku-01	ss-111111101100
PID0904	Zeng2018-ds	Fugra	FgmilR-7dps-107		SRR6516243	8555307	376.375	3220	3220	1	AGCGAAGUAGCUACCUGAUACAUAC	AUGCCUUAAGGGCGCCUUCGCUUU	AGCGAAGUAGCUACCUGAUACA	235	0	609	0	2 cited is not ma	Yes	fn-111	mb-01111	ax-1001001	ku-11	ss-101011101100
PID0904	Zeng2018-ds	Fugra	FgmilR-7dps-107		SRR6516244	1335037	0	0	0	NA	AGCGAAGUAGCUACCUGAUACA	CCUUAAGGGCGCCUUCGCUUU	AGCGAAGUAGCUACCUGAUACA	0	0	0	0	4 locus not expressed	No	fn-001	mb-01010	ax-1001011	ku-01	ss-000110001100
PID0905	Zeng2018-ds	Fugra	FgmilR-7dps-116		SRR6516242	7570166	1039.87	7872	256	0.0325203	UGCAAGUGAUGAUCUCUGGGGG	CACAGUCAUGGUUCAUCUCAAGCAUA	UGCAAGUGAUGAUCUCUGGGGGC	19	0	37	0	2 cited is not ma	No	fn-101	mb-01011	ax-1001011	ku-01	ss-111111001000
PID0905	Zeng2018-ds	Fugra	FgmilR-7dps-116		SRR6516243	8555307	424.882	3635	1210	0.332875	UGAUGAUCUCUGGGGGCAAGCU	CUGCUCACAGUCAUGGUUCAUCUCA	UGCAAGUGAUGAUCUCUGGGGGC	86	0	138	0	2 cited is not ma	No	fn-101	mb-01011	ax-1001011	ku-01	ss-101110001100
PID0905	Zeng2018-ds	Fugra	FgmilR-7dps-116		SRR6516245	6699886	0	0	0	NA	UGCAAGUGAUGAUCUCUGGGGGC	UCACAGUCAUGGUUCAUCUCAAGCAUA	UGCAAGUGAUGAUCUCUGGGGGC	0	0	0	0	4 locus not expressed	No	fn-001	mb-01011	ax-1001011	ku-01	ss-000110001000
PID0905	Zeng2018-ds	Fugra	FgmilR-7dps-116		SRR6516244	1335037	0	0	0	NA	UGCAAGUGAUGAUCUCUGGGGGC	UCACAGUCAUGGUUCAUCUCAAGCAUA	UGCAAGUGAUGAUCUCUGGGGGC	0	0	0	0	4 locus not expressed	No	fn-001	mb-01011	ax-1001011	ku-01	ss-000110001000
PID0906	Zeng2018-ds	Fugra	FgmilR-7dps-126		SRR6516242	7570166	2.77405	21	21	1	AGGCGUUUGUCGGUAUGGGCC	CCCAUAUGCGGCAUCGUCUACAUC	AGGCGUUUGUCGGUAUGGGCC	18	0	18	0	1 cited is ma	No	fn-110	mb-00011	ax-1011110	ku-01	ss-111111110110
PID0906	Zeng2018-ds	Fugra	FgmilR-7dps-126		SRR6516244	1335037	6.74139	9	8	0.888889	AGGCGUUUGUCGGUAUGGGCC	CCCAUAUGCGGCAUCGUCUACAUC	AGGCGUUUGUCGGUAUGGGCC	7	0	7	0	1 cited is ma	No	fn-110	mb-00011	ax-1011110	ku-01	ss-111111110110
PID0906	Zeng2018-ds	Fugra	FgmilR-7dps-126		SRR6516243	8555307	0.467546	4	4	1	AGGCGUUUGUCGGUAUGGGCC	CCCAUAUGCGGCAUCGUCUACAUC	AGGCGUUUGUCGGUAUGGGCC	2	0	2	0	1 cited is ma	No	fn-010	mb-00011	ax-1011010	ku-01	ss-111111110100
PID0906	Zeng2018-ds	Fugra	FgmilR-7dps-126		SRR6516245	6699886	0.895538	6	6	1	AGGCGUUUGUCGGUAUGGGCC	CCCAUAUGCGGCAUCGUCUACAUC	AGGCGUUUGUCGGUAUGGGCC	2	0	2	0	1 cited is ma	No	fn-010	mb-00011	ax-1011010	ku-01	ss-101111110100
PID0907	Zeng2018-ds	Fugra	FgmilR-7dps-101		SRR6516242	7570166	9.37892	71	71	1	AAUUCCUGUUGUUCGUCGUUGCC	GCAAGACGAGCAAGAACUCAUUGA	AAUUCCUGUUGUUCGUCGUUGCC	7	0	7	0	1 cited is ma	Yes	fn-111	mb-01011	ax-1001011	ku-01	ss-101111101100
PID0907	Zeng2018-ds	Fugra	FgmilR-7dps-101		SRR6516244	1335037	1.49809	2	2	1	AAUUCCUGUUGUUCGUCGUUGCCGCA	AGAGCAAGACGAGCAAGAACUCAUUGA	AAUUCCUGUUGUUCGUCGUUGCC	0	0	1	0	3 cited not expressed	Yes	fn-111	mb-01111	ax-1001001	ku-01	ss-100011101100
PID0907	Zeng2018-ds	Fugra	FgmilR-7dps-101		SRR6516245	6699886	0.597025	4	4	1	AAGGAUCCUAAGCUGCGACGUCGUAACU	GCAAGACGAGCAAGAACUCAUUGA	AAUUCCUGUUGUUCGUCGUUGCC	0	0	2	0	3 cited not expressed	No	fn-011	mb-00011	ax-1001101	ku-01	ss-101011101110
PID0907	Zeng2018-ds	Fugra	FgmilR-7dps-101		SRR6516243	8555307	2.33773	20	18	0.9	UUCCUGUUGUUCGUCGUUGCCGCAU	AGAGCAAGACGAGCAAGAACUCAUU	AAUUCCUGUUGUUCGUCGUUGCC	0	0	2	0	3 cited not expressed	No	fn-011	mb-01011	ax-1001001	ku-01	ss-101011101100
PID0908	Zeng2018-ds	Fugra	FgmilR-7dps-26		SRR6516242	7570166	161.027	1219	40	0.0328138	UGCCGGUCGAAGUUCUUUGAGA	GCGUUGAACUUGUCGGCAUC	UGCCGGUCGAAGUUCUUUGAGA	15	0	15	0	1 cited is ma	No	fn-101	mb-01011	ax-1001011	ku-01	ss-101111001000
PID0908	Zeng2018-ds	Fugra	FgmilR-7dps-26		SRR6516245	6699886	68.9564	462	0	0	UGCCGGUCGAAGUUCUUUGAGA	GCGUUGAACUUGUCGGCAUC	UGCCGGUCGAAGUUCUUUGAGA	0	0	0	0	3 cited not expressed	No	fn-001	mb-01011	ax-1001011	ku-01	ss-100111001000
PID0908	Zeng2018-ds	Fugra	FgmilR-7dps-26		SRR6516244	1335037	920.574	1229	0	0	UGCCGGUCGAAGUUCUUUGAGA	GCGUUGAACUUGUCGGCAUC	UGCCGGUCGAAGUUCUUUGAGA	0	0	0	0	3 cited not expressed	No	fn-001	mb-01011	ax-1001011	ku-01	ss-100111001000
PID0908	Zeng2018-ds	Fugra	FgmilR-7dps-26		SRR6516243	8555307	31.0918	266	2	0.0075188	UCUUUGAGAUCGGCAACAAGCU	CUUGCGCUGGGCGUUGAAC	UGCCGGUCGAAGUUCUUUGAGA	0	0	1	0	3 cited not expressed	No	fn-001	mb-01010	ax-1001011	ku-01	ss-100111001100
PID0910	Zeng2018-ds	Fugra	FgmilR-7dps-47		SRR6516244	1335037	1.49809	2	0	0	UGACCGAGGACGUAGUCUACCAA	GUUAGUCUAUGCUCGAGUCACA	UGACCGAGGACGUAGUCUACCAA	0	0	0	0	3 cited not expressed	No	fn-001	mb-01011	ax-1011011	ku-01	ss-110111011100
PID0910	Zeng2018-ds	Fugra	FgmilR-7dps-47		SRR6516242	7570166	3.96292	30	14	0.466667	UGACCGAGGACGUAGUCUACCAA	GUUAGUCUAUGCUCGAGUCACA	UGACCGAGGACGUAGUCUACCAA	4	0	4	0	1 cited is ma	No	fn-101	mb-01011	ax-1011011	ku-01	ss-101110011100
PID0910	Zeng2018-ds	Fugra	FgmilR-7dps-47		SRR6516245	6699886	0.746281	5	0	0	UGACCGAGGACGUAGUCUACCAA	GUUAGUCUAUGCUCGAGUCACA	UGACCGAGGACGUAGUCUACCAA	0	0	0	0	3 cited not expressed	No	fn-001	mb-01011	ax-1011011	ku-01	ss-100111011100
PID0910	Zeng2018-ds	Fugra	FgmilR-7dps-47		SRR6516243	8555307	2.33773	20	1	0.05	UGACCGAGGACGUAGUCUACCAA	GUUAGUCUAUGCUCGAGUCACA	UGACCGAGGACGUAGUCUACCAA	0	0	0	0	3 cited not expressed	No	fn-001	mb-01011	ax-1011011	ku-01	ss-100111011100
PID0911	Zeng2018-ds	Fugra	FgmilR-7dps-88		SRR6516242	7570166	3.43453	26	24	0.923077	AGAGCUGUAGGUCACCCUGUA	AGGGUAGUUUUGCCUGUGG	AGAGCUGUAGGUCACCCUGUA	16	0	16	0	1 cited is ma	Yes	fn-111	mb-01111	ax-1011011	ku-01	ss-111111111110
PID0911	Zeng2018-ds	Fugra	FgmilR-7dps-88		SRR6516243	8555307	4.09103	35	23	0.657143	AGAGCUGUAGGUCACCCUGUA	AGGGUAGUUUUGCCUGUGG	AGAGCUGUAGGUCACCCUGUA	11	0	11	0	1 cited is ma	No	fn-101	mb-01011	ax-1011011	ku-01	ss-111110111100
PID0911	Zeng2018-ds	Fugra	FgmilR-7dps-88		SRR6516245	6699886	0	0	0	NA	AGAGCUGUAGGUCACCCUGUA	AGGGUAGUUUUGCCUGUGG	AGAGCUGUAGGUCACCCUGUA	0	0	0	0	4 locus not expressed	No	fn-001	mb-01011	ax-1011011	ku-01	ss-000110011100
PID0911	Zeng2018-ds	Fugra	FgmilR-7dps-88		SRR6516244	1335037	0	0	0	NA	AGAGCUGUAGGUCACCCUGUA	AGGGUAGUUUUGCCUGUGG	AGAGCUGUAGGUCACCCUGUA	0	0	0	0	4 locus not expressed	No	fn-001	mb-01011	ax-1011011	ku-01	ss-000110011100
PID0913	Zeng2018-ds	Fugra	FgmilR-7dps-13		SRR6516242	7570166	6.47278	49	25	0.510204	UACGUUGGUCUUGCAGAGAACAA	GUUCUGGGCGCGUACUCAACGGACC	UACGUUGGUCUUGCAGAGAACAA	8	0	8	0	1 cited is ma	No	fn-101	mb-01011	ax-1001011	ku-01	ss-101110101100
PID0913	Zeng2018-ds	Fugra	FgmilR-7dps-13		SRR6516245	6699886	0.149256	1	0	0	UACGUUGGUCUUGCAGAGAACAA	GUUCUGGGCGCGUACUCAACGGACC	UACGUUGGUCUUGCAGAGAACAA	0	0	0	0	3 cited not expressed	No	fn-001	mb-01011	ax-1001011	ku-01	ss-110111001100
PID0913	Zeng2018-ds	Fugra	FgmilR-7dps-13		SRR6516243	8555307	5.84433	50	13	0.26	AGCCACGCCCGCGAUGUUGUUCUG	GAACAAAUAACGCAGCGCCAGCUGA	UACGUUGGUCUUGCAGAGAACAA	0	0	2	0	3 cited not expressed	No	fn-001	mb-01111	ax-1001011	ku-01	ss-101110001100
PID0913	Zeng2018-ds	Fugra	FgmilR-7dps-13		SRR6516244	1335037	0	0	0	NA	UACGUUGGUCUUGCAGAGAACAA	GUUCUGGGCGCGUACUCAACGGACC	UACGUUGGUCUUGCAGAGAACAA	0	0	0	0	4 locus not expressed	No	fn-001	mb-01011	ax-1001011	ku-01	ss-000110001100
PID0918	Zeng2018-ds	Fugra	FgmilR-7dps-10		SRR6516244	1335037	2.24713	3	3	1	UUUAGUAGAAUUCCGGCUUG	ACUGCAAUCUGUAAAAA	UAGUAGAAUUCCGGCUUGGCCCU	0	0	3	0	3 cited not expressed	Yes	fn-111	mb-01011	ax-1011111	ku-01	ss-111111111110
PID0918	Zeng2018-ds	Fugra	FgmilR-7dps-10		SRR6516242	7570166	1.71727	13	13	1	UAGUAGAAUUCCGGCUUGGCCCU	GAGCCAACUGCAAUCUGUAAA	UAGUAGAAUUCCGGCUUGGCCCU	4	0	4	0	1 cited is ma	Yes	fn-111	mb-01011	ax-1011011	ku-01	ss-101111111100
PID0918	Zeng2018-ds	Fugra	FgmilR-7dps-10		SRR6516243	8555307	0.818206	7	7	1	UGUCUGUUUCUUGAUCUGUGAA	GAGCCAACUGCAAUCUGUAAA	UAGUAGAAUUCCGGCUUGGCCCU	0	0	3	0	3 cited not expressed	No	fn-011	mb-00010	ax-1011011	ku-01	ss-101111111100
PID0918	Zeng2018-ds	Fugra	FgmilR-7dps-10		SRR6516245	6699886	0.298513	2	2	1	UAGUAGAAUUCCGGCUUGGCCCUUC	GGGAGCCAACUGCAAUCUGUAAA	UAGUAGAAUUCCGGCUUGGCCCU	0	0	1	0	3 cited not expressed	No	fn-011	mb-01011	ax-1011001	ku-01	ss-100011111100
PID0919	Zeng2018-ds	Fugra	FgmilR-7dps-118		SRR6516242	7570166	14.0023	106	98	0.924528	UAGAUCGAGCCGUCGAUGUGCU	CAAAGCAUGGUUGGAUAGUUCU	UAGAUCGAGCCGUCGAUGUGC	12	0	27	0	2 cited is not ma	Yes	fn-111	mb-01011	ax-1001011	ku-01	ss-111111101100
PID0919	Zeng2018-ds	Fugra	FgmilR-7dps-118		SRR6516243	8555307	16.2472	139	117	0.841727	UGGCAAAGCAUGGUUGGAUAGU	AAAGCAUGGUUGGAUAGUUCU	UAGAUCGAGCCGUCGAUGUGC	2	0	28	0	2 cited is not ma	Yes	fn-111	mb-00111	ax-1001011	ku-01	ss-111111101100
PID0919	Zeng2018-ds	Fugra	FgmilR-7dps-118		SRR6516245	6699886	0	0	0	NA	UAGAUCGAGCCGUCGAUGUGC	AAAGCAUGGUUGGAUAGUUCU	UAGAUCGAGCCGUCGAUGUGC	0	0	0	0	4 locus not expressed	No	fn-001	mb-01011	ax-1001011	ku-01	ss-000110001100
PID0919	Zeng2018-ds	Fugra	FgmilR-7dps-118		SRR6516244	1335037	0	0	0	NA	UAGAUCGAGCCGUCGAUGUGC	AAAGCAUGGUUGGAUAGUUCU	UAGAUCGAGCCGUCGAUGUGC	0	0	0	0	4 locus not expressed	No	fn-001	mb-01011	ax-1001011	ku-01	ss-000110001100
PID0920	Zeng2018-ds	Fugra	FgmilR-7dps-42		SRR6516242	7570166	3.56663	27	14	0.518519	UGAGAAGGUCGAAGACAUGUCGC	GCUGUCUCUCCUACAUCGUUC	UGAGAAGGUCGAAGACAUGUCGC	7	0	7	0	1 cited is ma	No	fn-101	mb-01011	ax-1011011	ku-01	ss-111110101100
PID0920	Zeng2018-ds	Fugra	FgmilR-7dps-42		SRR6516243	8555307	1.87018	16	12	0.75	UGGCGCUGUCUCUCCUACAU	GCUGUCUCUCCUACAUCGUUC	UGAGAAGGUCGAAGACAUGUCGC	0	0	2	0	3 cited not expressed	No	fn-001	mb-00011	ax-1011011	ku-01	ss-111110101100
PID0920	Zeng2018-ds	Fugra	FgmilR-7dps-42		SRR6516245	6699886	0	0	0	NA	UGAGAAGGUCGAAGACAUGUCGC	GCUGUCUCUCCUACAUCGUUC	UGAGAAGGUCGAAGACAUGUCGC	0	0	0	0	4 locus not expressed	No	fn-001	mb-01011	ax-1011011	ku-01	ss-000110001100
PID0920	Zeng2018-ds	Fugra	FgmilR-7dps-42		SRR6516244	1335037	0	0	0	NA	UGAGAAGGUCGAAGACAUGUCGC	GCUGUCUCUCCUACAUCGUUC	UGAGAAGGUCGAAGACAUGUCGC	0	0	0	0	4 locus not expressed	No	fn-001	mb-01011	ax-1011011	ku-01	ss-000110001100
PID0921	Zeng2018-ds	Fugra	FgmilR-7dps-128		SRR6516242	7570166	61.6895	467	467	1	UUCAACCCCCAGAACUUUGAGGCC	GCCAAGCGCGACCUCAUGGCC	CCCUGAGGAGCACUUUGACACCU	12	0	85	0	2 cited is not ma	Yes	fn-111	mb-00010	ax-1001011	ku-01	ss-101111101100
PID0921	Zeng2018-ds	Fugra	FgmilR-7dps-128		SRR6516244	1335037	2.24713	3	3	1	CUUCAACCCCCAGAACUUUGAGGCC	GCCAAGCGCGACCUCAUGGCC	CCCUGAGGAGCACUUUGACACCU	0	0	2	0	3 cited not expressed	Yes	fn-111	mb-00010	ax-1001001	ku-01	ss-101011101110
PID0921	Zeng2018-ds	Fugra	FgmilR-7dps-128		SRR6516243	8555307	12.9744	111	111	1	CAACCCCCAGAACUUUGAGGCCAAG	GCCAAGCGCGACCUCAUGGCC	CCCUGAGGAGCACUUUGACACCU	1	0	4	0	2 cited is not ma	Yes	fn-111	mb-00010	ax-1001001	ku-01	ss-101011101100
PID0921	Zeng2018-ds	Fugra	FgmilR-7dps-128		SRR6516245	6699886	0.149256	1	1	1	CUUUGAGGCCAAGCGCGACCUCA	AGGAGCACUUUGACACCUCCCACUU	CCCUGAGGAGCACUUUGACACCU	0	0	1	0	3 cited not expressed	No	fn-011	mb-01011	ax-1001111	ku-01	ss-110111101110
PID0922	Zeng2018-ds	Fugra	FgmilR-7dps-119		SRR6516242	7570166	15.7196	119	106	0.890756	UCAGUUUGGCUCGCGGCGCUGCGC	GGAGAAAGUGAGGAGCAUGAGG	UUUUGGUUCAGUUUGGCUCGCGG	6	0	12	0	2 cited is not ma	Yes	fn-111	mb-01011	ax-1001011	ku-01	ss-101111101100
PID0922	Zeng2018-ds	Fugra	FgmilR-7dps-119		SRR6516243	8555307	29.8061	255	238	0.933333	UAGGUAGAUGUUUGCGAAAGUUGU	AGUUCCCAAGGGUGACUUACG	UUUUGGUUCAGUUUGGCUCGCGG	8	0	19	0	2 cited is not ma	Yes	fn-111	mb-01011	ax-1001011	ku-01	ss-101111101100
PID0922	Zeng2018-ds	Fugra	FgmilR-7dps-119		SRR6516245	6699886	0	0	0	NA	UUUUGGUUCAGUUUGGCUCGCGG	GUGAGGAGCAUGAGGGUGUAAUA	UUUUGGUUCAGUUUGGCUCGCGG	0	0	0	0	4 locus not expressed	No	fn-001	mb-01011	ax-1001011	ku-01	ss-000110001100
PID0922	Zeng2018-ds	Fugra	FgmilR-7dps-119		SRR6516244	1335037	0	0	0	NA	UUUUGGUUCAGUUUGGCUCGCGG	GUGAGGAGCAUGAGGGUGUAAUA	UUUUGGUUCAGUUUGGCUCGCGG	0	0	0	0	4 locus not expressed	No	fn-001	mb-01011	ax-1001011	ku-01	ss-000110001100
PID0923	Zeng2018-ds	Fugra	FgmilR-7dps-32		SRR6516242	7570166	1.71727	13	13	1	UACUUGAGAUCCUGACAAGAGG	AACGUCACUUCCCAAAUGCC	UACUUGAGAUCCUGACAAGAGG	11	0	11	0	1 cited is ma	Yes	fn-111	mb-01011	ax-1001111	ku-01	ss-111111101110
PID0923	Zeng2018-ds	Fugra	FgmilR-7dps-32		SRR6516243	8555307	0.701319	6	3	0.5	UACUUGAGAUCCUGACAAGAGG	AACGUCACUUCCCAAAUGCC	UACUUGAGAUCCUGACAAGAGG	3	0	3	0	1 cited is ma	No	fn-001	mb-01011	ax-1001011	ku-01	ss-111110101100
PID0923	Zeng2018-ds	Fugra	FgmilR-7dps-32		SRR6516244	1335037	0.749043	1	0	0	UACUUGAGAUCCUGACAAGAGG	AACGUCACUUCCCAAAUGCC	UACUUGAGAUCCUGACAAGAGG	0	0	0	0	3 cited not expressed	No	fn-001	mb-01011	ax-1001011	ku-01	ss-110111001100
PID0923	Zeng2018-ds	Fugra	FgmilR-7dps-32		SRR6516245	6699886	0.149256	1	0	0	UACUUGAGAUCCUGACAAGAGG	AACGUCACUUCCCAAAUGCC	UACUUGAGAUCCUGACAAGAGG	0	0	0	0	3 cited not expressed	No	fn-001	mb-01011	ax-1001011	ku-01	ss-100111001100
PID0924	Zeng2018-ds	Fugra	FgmilR-7dps-124		SRR6516244	1335037	0.749043	1	1	1	CGUAAUGGCACUGUAGAAGAAUUC	AGUCCCUCUGGCAAUGCCAUCUACGC	UGGCACUGUAGAAGAAUUCGACA	0	0	1	0	3 cited not expressed	Yes	fn-111	mb-01011	ax-1011111	ku-01	ss-110111111110
PID0924	Zeng2018-ds	Fugra	FgmilR-7dps-124		SRR6516242	7570166	7.00117	53	53	1	UGGCACUGUAGAAGAAUUCGACAU	GUUGGAGUCCCUCUGGCAAUGCCAUCU	UGGCACUGUAGAAGAAUUCGACA	3	0	6	0	2 cited is not ma	Yes	fn-111	mb-01011	ax-1011011	ku-01	ss-101111111100
PID0924	Zeng2018-ds	Fugra	FgmilR-7dps-124		SRR6516245	6699886	0	0	0	NA	UGGCACUGUAGAAGAAUUCGACA	UUGGAGUCCCUCUGGCAAUGCCAUCU	UGGCACUGUAGAAGAAUUCGACA	0	0	0	0	4 locus not expressed	No	fn-001	mb-01011	ax-1011011	ku-01	ss-000110011100
PID0924	Zeng2018-ds	Fugra	FgmilR-7dps-124		SRR6516243	8555307	0	0	0	NA	UGGCACUGUAGAAGAAUUCGACA	UUGGAGUCCCUCUGGCAAUGCCAUCU	UGGCACUGUAGAAGAAUUCGACA	0	0	0	0	4 locus not expressed	No	fn-001	mb-01011	ax-1011011	ku-01	ss-000110011100
PID0925	Zeng2018-ds	Fugra	FgmilR-7dps-44		SRR6516242	7570166	1.32097	10	10	1	UGCGUCGGCCGAAGGAAGAGAA	CUGUUCAGCUUCGGUCGCCAUC	UGCGUCGGCCGAAGGAAGAGAA	9	0	9	0	1 cited is ma	Yes	fn-111	mb-01011	ax-1011111	ku-01	ss-111111111110
PID0925	Zeng2018-ds	Fugra	FgmilR-7dps-44		SRR6516243	8555307	0.35066	3	2	0.666667	UGCGUCGGCCGAAGGAAGAGAA	CUGUUCAGCUUCGGUCGCCAUC	UGCGUCGGCCGAAGGAAGAGAA	0	0	0	0	3 cited not expressed	No	fn-001	mb-01011	ax-1011011	ku-01	ss-110110111100
PID0925	Zeng2018-ds	Fugra	FgmilR-7dps-44		SRR6516245	6699886	0	0	0	NA	UGCGUCGGCCGAAGGAAGAGAA	CUGUUCAGCUUCGGUCGCCAUC	UGCGUCGGCCGAAGGAAGAGAA	0	0	0	0	4 locus not expressed	No	fn-001	mb-01011	ax-1011011	ku-01	ss-000110011100
PID0925	Zeng2018-ds	Fugra	FgmilR-7dps-44		SRR6516244	1335037	0	0	0	NA	UGCGUCGGCCGAAGGAAGAGAA	CUGUUCAGCUUCGGUCGCCAUC	UGCGUCGGCCGAAGGAAGAGAA	0	0	0	0	4 locus not expressed	No	fn-001	mb-01011	ax-1011011	ku-01	ss-000110011100
PID0927	Zeng2018-ds	Fugra	FgmilR-7dps-73		SRR6516242	7570166	152.705	1156	43	0.0371972	UCGUAUCGAGGCUUUGCUUGUU	AGGAACAGCCCGAUGCGGGG	UCGUAUCGAGGCUUUGCUUGUU	7	0	7	0	1 cited is ma	No	fn-101	mb-01011	ax-1011011	ku-01	ss-101111011100
PID0927	Zeng2018-ds	Fugra	FgmilR-7dps-73		SRR6516244	1335037	12288.8	16406	0	0	UCGUAUCGAGGCUUUGCUUGUU	AGGAACAGCCCGAUGCGGGG	UCGUAUCGAGGCUUUGCUUGUU	0	0	0	0	3 cited not expressed	No	fn-001	mb-01011	ax-1011011	ku-01	ss-100111011100
[truncated: 5,154 more rows]
