# Supplementary material for: Comprehensive re-analysis of hairpin small RNAs in fungi reveals loci with conserved links
Source: eLife. 2022 Dec 9;11:e83691. doi: 10.7554/eLife.83691 (PMC9757828; doi:10.7554/eLife.83691)
Supplement: Supplementary file 5. — We show identifiers for the locus, publication, native and NCBI assemblies used in its analysis, hairpin coordinates used for each assembly, and the most abundant sequence, indicating whether it has been corrected by our sequencing re-analysis. For loci with strong support for a targeting relationship, the type of evidence is shown. Locus details like the hairpin sequence, folding, minimum free energy, and boundary coordinates of the duplex within the hairpin are provided. We report identification details, including the level of coordinate and locus detail provided by the source publication and a locus’s validation status. Confirmation details include the rule set confirmation status, interactions with Rfam (including Rfam descriptions), intersections with genomic features, the status as an intergenic locus, the intergenomic conservation status, and the tier classification of all reported loci. Relevant figures are indicated where available for data columns. Dashes (‘-’) indicate fields that are not evaluated due to an ‘invalid’ hairpin. [file elife-83691-supp5.xlsx]

## Sheet: Description
	Name:	Supplementary File 5
	Title:	Locus confirmation status
	Description:	Table defining the confirmation status for a mi/milRNA for all reported loci. We show identifiers for the locus, publication, native and NCBI assemblies used in its analysis, hairpin coordinates used for each assembly, and the most abundant sequence, indicating whether it has been corrected by our sequencing re-analysis. For loci with strong support for a targeting relationship, the type of evide…

## Sheet: File S5 - tier_placements
# Supplementary File 5 - Locus confirmation status					"-" indicates a field not tested due to an invalid mi/milRNA hairpin
# related figure							Figure 3,4			Figure2A	Figure2A						Figure 1D		Figure 1E	Figure5A	Figure2D		Figure 3A				Figure 3B		Figure 3C	Figure 4A	Figure 5A
#Locus identifier	Source publication	Species abbreviation	Locus name in source publication	Paralog identifier	Full locus coordinates of the mi/milRNA in the native genome assembly. (Sequence:start-stop:strand)	Native genome assembly for mi/milRNA.	Full locus coordinates of the mi/milRNA in the nearest annotated NCBI (genbank) genome assembly. (Sequence:start-stop:strand)	NCBI (genbank) genome assembly for mi/milRNA.	Annotations available for NCBI assembly	Most abundant sequence of the hairpin.	Has the reported MAS been changed to reflect our analysis?	Full sequence of the hairpin.	Full predicted fold pattern of the hairpin (RNAfold).	Minimum free energy of the hairpin.	Coordinate positions for duplex within hairpin. Coded by the left and right boundaries of mature sequences in the 5'->3' direction.	Length in nucleotides including both sides of the mature duplex.	Assessment of coordinates leading to locus identification (where provided). Identifies where coordinates do not match the assembly (mode 2), do not contain the proposed MAS (mode 3), or give an incomplete description of the hairpin (mode 4).	Assessment of the source for the genomic and sequence information for a locus. i.e. did they provide genomic coordinates, just a hairpin sequence, or niether.	Is the hairpin based on published sequence/coordinates or recovered?	Type of strong functional support (where available)	Assessment of the fail-mode for invalid hairpins (many hairpins are assessed for recovered loci).	Fungal hpRNA rule confirmation	Rfam hit found by blast (blank indicates no hit)	Blast e-value	Rfam description	General Rfam description	Is there no blast hit in the NCBI annotated assembly? (Y:Yes, N:No)	Is it contained in an intron?	Considered intergenic? (Y:Yes, N:No)	Genomically conserved? (Y:Yes, N:No)	Confidence tier
pid	citation	species	parent	paralog	locus	assembly	ncbi_locus	ncbi_assembly	available_annotations	MAS	MAS_corrected	hairpin_sequence	hairpin_fold	mfe	duplex_coordinates	duplex.to.duplex_length	coordinate_assessment	locus_assessment	coordinate_source	functional_support	validity_assessment	fungal_rule_confirmation	rfam	rfam_eval	rfam_description	rfam_cat	found_NCBI_equivalent	Intersection	intergenic	conserved	tier
PID0000	Lee2010-al	Necra	milR-1		NC_026505.1:1447479-1447685:+	GCF_000182925.2_NC12_genomic	CM002240.1:1447497-1447654:+	GCA_000182925.2_NC12	gene, TE	UAAGCCGCGAGUACGCCUCCGGACU	FALSE	UCGCUUCUCAACGGUUACAGCCCCCGGGACGCACUACGGUUUAUACCUUCCCCCCCCCCCCCCCCCCCCCCUCUCCACUCCUUUAUGUCCAUCAUGGUGCAGAUGAUCUGCUCAAGGAAAAAGGGAAAAGGGGUAGAUGGGAGGAUGGUUAUAAGCCGCGAGUACGCCUCCGGACUGUAACUUUCUGAUUUUCUUUUUUUUUUGUAC	.......(((..((((((((...(((((.((.(((.(((((((((((.(((.(((..(..((((....((((.(((.......((((.....))))(.(((((...))))).)..)))...))))....))))..)..))).))).)).)))))))))..))).)).).)))).))))))))...)))...................	-66.6	[18, 44, 149, 175]	157	2 invalid_coords	Hairpin	published		valid	0-no_evidence					Y	none	Y	Y	2
PID0001	Lee2010-al	Necra	milR-2		NC_026506.1:2692755-2692865:-	GCF_000182925.2_NC12_genomic	CM002241.1:2692778-2692835:-	GCA_000182925.2_NC12	gene, TE	UGUCCUGGUACUUUCAUCCGGCUGU	FALSE	AAGGCCAGGAGUUCAACUCUCCUAUCGGACAAUGUCCUGGUACUUUCAUCCGGCUGUAUCCCAGCUUGGAUGGAAAUGCCGGGAAGUUUUUUGGGGGGGGAUUUCUUUCUU	.(((..(((((((...((((((((..((((....((((((((.(((((((((((((.....)))).))))))))).)))))))).))))..)))))))))))))))..)))	-45.8	[30, 56, 60, 87]	57	2 invalid_coords	Hairpin	published		valid	0-no_evidence					Y	none	Y	Y	2
PID0002	Lee2010-al	Necra	milR-3	a	NC_026501.1:7586404-7586644:+	GCF_000182925.2_NC12_genomic	CM002236.1:7586408-7586634:+	GCA_000182925.2_NC12	gene, TE	UGAACGAGCGGUUGUUGU	FALSE	UCCAACAACAGCCGCUUGGUCAGAUGGCACAGUGGUCUACCGAUUGAGUCUCUAAAACUUAAAACAAAAAAAAACCUAUUGCCUGUCCGGAUCGGGAACGGUGUGCUAAGAUACGAAAAGGGGUCUUCACAUUCUAGUAGCCGGUCUACCUAUAUGGUAUCUGGGAACGCUCCAGUCGACAGCACGAGACAUUCAUACGGUUCACCAUUGCUCUGAACGAGCGGUUGUUGUUUUUUGCUCU	...(((((((((((((((.(((((..(((..(((((..((((..((((((((...........................(((.((((.(((((((..((((((((..(((((.(......).)))))))))))...))..)))))))(((.....)))..(((((.....)))))..))))))).)))))..)))..))))..))))))))))))).))))))))))))))).........	-81.7	[4, 23, 211, 230]	226	2 invalid_coords	Hairpin	published		valid	0-no_evidence					Y	PCG-UTR-exon	N	Not tested: not intergenic	3
PID0003	Lee2010-al	Necra	milR-3	b	NC_026501.1:790061-790345:-	GCF_000182925.2_NC12_genomic	CM002236.1:790118-790332:-	GCA_000182925.2_NC12	gene, TE	UGAACGAGCGGUUGUUGU	FALSE	GUCCUUCCUUCUAACAACAACCGCUUGGUCAGAUGGCACAGUGGUCUACCGUUUAAGUUUCAAAAACUCAAAAUCUGUUAUCUGUCCGGAUUGGGAACGGUGUGUGCUAAGACACGAAAAGGGGUCUUCACUGCCUAGUAGCCGGUCUACCUAUAUGGUAUCUGGGAACGCUCCAGUCGACAGAAGAAACCAAACGGUUCACCAUUGCUCUGAACGAGCGGUUGUUGUUUUUUGAUUAUUUUAGAACCAUCGAGAAGUGGUGCGUUCGAACCUAUCGAAGGUGAA	......(((((.(((((((((((((((.(((((..(((..(((((..(((((((..(((((...(((.........))).((((((..(((((((...((((.(((..(((((.(......).))))))))))))..((..((((..((((.....)))).))))..))..))))))))))))).))))).)))))))..))))))))))))).)))))))))))))))....(((.......(((((((((.....))))).))))......))))))))....	-98	[13, 32, 208, 227]	214	2 invalid_coords	Hairpin	published		valid	0-no_evidence					Y	none	Y	Y	2
PID0004	Lee2010-al	Necra	milR-3	c	NC_026505.1:6343591-6343851:-	GCF_000182925.2_NC12_genomic	CM002240.1:6343612-6343842:-	GCA_000182925.2_NC12	gene, TE	UGAACGAGCGGUUGUUGU	FALSE	CUCCUUCCAACAACAACCGCUUGGUCAGAUGGCACAGUGGUCUACCGAUUGAGUCUCUAAAACUCAAAAAACAAAAAAAAAACCUAUUGCCUGUCCGGAUCGGGAACGGUGUGCCAAGAUACGAAAAGGGGUCUUCACAUUCUAGUAGCCGGUCUACCUAUAUGGUAUCUGGGAACGCUCCAGUCGACAGGAACGAGACAUUCAUACGGUUCACCAUUGCUCUGAACGAGCGGUUGUUGUUUUUUCGCCCCUUUUUCUUUU	........(((((((((((((((.(((((..(((..(((((..((((..((((((((..............(((............)))((((((.(((((((..((((((((..(((((.(......).)))))))))))...))..)))))))(((.....)))..(((((.....)))))..))))))...)))))..)))..))))..))))))))))))).)))))))))))))))....................	-84.4	[9, 28, 220, 239]	230	2 invalid_coords	Hairpin	published		valid	0-no_evidence					Y	none	Y	Y	2
PID0005	Lee2010-al	Necra	milR-4		NC_026504.1:5003280-5003478:-	GCF_000182925.2_NC12_genomic	CM002239.1:5003305-5003475:-	GCA_000182925.2_NC12	gene, TE	UUCCCAAAUCACCUUCACCUUCACC	FALSE	UCCACUUCCCAAAUCACCUUCACCUUCACCCAUAUCUCCACUUUUAUUCCGCGGAGGGCGUGUGGCUCAGUUGGUAGAGCGUUCGCUUAGCAUGUUUAUUCUGAGCAUGCGAAAGGUCCUGGGUUCGAUUCCCAGCUCGUCCAAAUGGGAAGGUGUUCUGGUGAGAUGGGUCCUCUUCUUUUUGUCUUUUUUUUCCUUU	.......((((..(((((..((((((..(((((..((((.(.........).))))((((....((((........))))...))))..(((((((((...)))))))))....((.((((((.......)))))...).))..)))))))))))....)))))..)))).............................	-62.5	[3, 29, 147, 173]	170	2 invalid_coords	Hairpin	published		valid	0-no_evidence	RF00005	1.37e-42	tRNA	tRNA	Y	PCG-UTR-exon	N	Not tested: not intergenic	4
PID0006	Lee2010-al	Necra	milR-5		-	GCF_000182925.2_NC12_genomic	-	-	-	AAGCAAGAUCCGGACAUUC	-	-	-	-	-	-	2 invalid_coords	Hairpin	published		secondary structure in duplex	-	-	-	-	-	-	not evaluated: hairpin invalid	-	-	-
PID0007	Lee2010-al	Necra	milR-6		NC_026501.1:2599784-2600064:-	GCF_000182925.2_NC12_genomic	CM002236.1:2599839-2599914:-	GCA_000182925.2_NC12	gene, TE	GGCCGAUUUCCUCGUCAGUCA	FALSE	AAUUCCCUUUCCUCCUCUCUUUCUCUUUUUUUUUCCUUCGUGCGGCGGUCACGACUCAUUCAAAACAUUACCCGUGUUGCUUCGUUUUCAUCUCCUUUCGGAGAUUCCGUGAAAACGUCGCGUCAGUCGUGGCCUAGAUAAAUCAUAUUGCAGGCCGAUUUCCUCGUCAGUCAGUCCAUCGAGAACCAACCCCUUAGGGCUGGAUGGUGAUGAAGAGAUCGGACAUUUUAUCUGGGGCUACUUUCUUUGACUGUUGUGCGUAACUGGUUUGGAGGUUGCUU	..........(((((...((..................(((((((((((((.((((.......(((((.....)))))((..(((((((((((((....))))).....))))))))..))...))))((((((((((((((............((((((((.((((((......(((((.((......(((....))))).))))))))))).))))))))....))))))).)))))))......))))))))))))).....))...)))))......	-86.3	[150, 172, 203, 225]	75	2 invalid_coords	Hairpin	published		valid	0-no_evidence					Y	near-PCG	N	Not tested: not intergenic	3
PID0008	Lee2010-al	Necra	milR-7		NC_026501.1:2543674-2544122:+	GCF_000182925.2_NC12_genomic	CM002236.1:2543795-2543843:+	GCA_000182925.2_NC12	gene, TE	UGCGGUGCUUUCCUUGCCCU	FALSE	AUUAUAUCACAUUCUCGGAAUGCAACUUGGAUGCGAGGUCCCCGGAUUCGUUCGGAGCUGACCCAGGACCAAUUCAUCGAUUUCGAACAGAAUGGAGAACAGAUACCAGCGAACAAUCUUGGGUGCGGUGCUUUCCUUGCCCUUCGUGGCUCCAUGGAAAGGGUCGCAAUGAUUGGGCGUACAUACCUACAUCGAUGUGCUUUGUAAUUUGAUAUGAACGUUUACAUUUGUGAACGAGUGUUCCGUGUCAUACGUACCAAGUAGCGGCGUACUGCAAGCUCGUACACAAUCGAAGAGACCGAAUGUCUACUCGCGUGUGCAUGUGAUGUUACGGAGCAUAUGGGUUGAAGACGGUUGCGAUAAGUCUUCAGAAGGGGUUUUGUGCCUUUCUUCGGGAUC…	.........(((...(((((((.......((((.(.((..(((((((((((((((((.(((...............))).)))))))).)))(((..........)))(((..(((((.....((((((.((((((..(((......))).....)))))).))))))..)))))..)))..........(((.((((((((((((((.(.((((...(((((((....)))))))((((..((((....(((.......)))))))..))))........((((((...(((..((((.....))))..))).)))))))))).).)))))))))))))).)))(((((((...........)))))))((((((........))))))))))))..)…	-133.2	[121, 142, 145, 169]	48	2 invalid_coords	Hairpin	published		valid	0-no_evidence					Y	none	Y	Y	2
PID0009	Lee2010-al	Necra	milR-8		-	GCF_000182925.2_NC12_genomic	-	-	-	AAACGCUCUACCGGGUUGCUGUUAGA	-	-	-	-	-	-	2 invalid_coords	Hairpin	published		secondary structure in duplex	-	-	-	-	-	-	not evaluated: hairpin invalid	-	-	-
PID0010	Lee2010-al	Necra	milR-9		NC_026505.1:2294415-2294665:-	GCF_000182925.2_NC12_genomic	CM002240.1:2294565-2294608:-	GCA_000182925.2_NC12	gene, TE	GAGCUUGUCGCCUUCAA	FALSE	CCCCCAUUUUACAACACACAAAACCCUUGCCCAAAAUACCCAGCUUCAUCAUUAUGCUAGAGCUUGUCGCCUUCAAAAUAACCCCAGGGCGCGCAAGUGUGGACAAUGAAGCAAGAAUAAAUGUACGGCUGGUUCAUUCCUUCAAAUGGCCACCCUCCGUCAAGUCAUGAAUCAUCUUGUCUGCCCGUCCCGGGUCUUGAUGGUAUGUGCUUGCGGAUACAUAUCCUAUUGUGACAAUUUCAAUGUUGUGC	.........(((((((..........................(((((((.....(((((..((((((((((((............)))))).)))))).))).)))))))))..............((.((((.((((......)))))))).))((((.((((.((((.((((((..(...(((((...))))))..)))))).))))))))))))..((((......))))..........))))))).	-64.4	[57, 75, 82, 100]	43	2 invalid_coords	Hairpin	published		valid	0-no_evidence					Y	PCG-UTR-exon	N	Not tested: not intergenic	3
PID0011	Lee2010-al	Necra	milR-10		-	GCF_000182925.2_NC12_genomic	-	-	-	CACUCGUGUGCUGUAGCGGGACUA	-	-	-	-	-	-	2 invalid_coords	Hairpin	published		secondary structure in duplex	-	-	-	-	-	-	not evaluated: hairpin invalid	-	-	-
PID0012	Lee2010-al	Necra	milR-11		NC_026505.1:1345795-1346013:-	GCF_000182925.2_NC12_genomic	CM002240.1:1345797-1346011:-	GCA_000182925.2_NC12	gene, TE	UGACCGGGCGGUUGUUGUU	FALSE	UCAACAACAACCGCUUGGUCAGAUGGCACAACGGUCUACCGUUUGAGUUCUCAAAACUCAAAAACCUAUUGCCUGUCCGGAUCGGGAACGGUGUGCUAAGAUACGGAAAGGGGUCUUCACAUCUAGUAGCCGGUCUACCUAUAUGGUAUCUGGGAACGCUCCAGUCGACAGAUGAAAUCAAACGGUUCACCGAUGCUCUGACCGGGCGGUUGUUGUUUU	..(((((((((((((((((((((..(((...((((..(((((((((.(((......................(((((.(((((((..((((((((..(((((.(......).)))))))))))..))..)))))))(((.....)))..(((((.....)))))..)))))..))).)))))))))..)))).))))))))))))))))))))))))..	-90.1	[2, 22, 196, 216]	214	2 invalid_coords	Hairpin	published		valid	0-no_evidence					Y	PCG-UTR-exon	N	Not tested: not intergenic	3
PID0013	Lee2010-al	Necra	milR-12		NC_026505.1:5510213-5510593:+	GCF_000182925.2_NC12_genomic	CM002240.1:5510264-5510353:+	GCA_000182925.2_NC12	gene, TE	UCAUCCGAUCAUGUCACAUUGUC	FALSE	ACAACAACCCAUCUUUUUCCAUCUUUGCUUUCUUCGUUUUGUUCCGACCUGGACAUGCGACGUGGUUUGGAUGGACAUCUUUUGAAACUCUAGACUUCGCGGGAAGUCCCCAACCCGUUCAUCCGAUCAUGUCACAUUGUCUUGGUUGGCACAAACGUAAAAGCAUCUGCUACGAUCUGGGGGGCUUCACAAGUUCAGGUGAUGAGAAACACAAUAAUAGAGUCAAGCUCUGAAGUGGUGCCGGGGUAAAUCUUCGCGCAUCACCCUUGAUGACUCUUAUUGAAUACGAUCUGAUGAACUUUCCAAGCGUUUGCUUUUUUGAAUUAUUCAAACCUCCUCUAUCAUUACGUAGUACUAGUCUAGCUUCGUCCACUCCUCGUU	.........................((((((...(((((.((.((((((.(((((((.(((((((((.((((((((.((....)).......((((((....))))))........))))))))))))))))).)).))))).)))))).)))))))..))))))..(((((((((..((((((......(((((((...(((........(((((..(((((((...((....((((((((((((.....))))).)))))))....))))))))))))))......)))...)))))))...((((....)))).((((((...))))))))))))..))).....))))))...........................	-111.7	[51, 75, 116, 140]	89	2 invalid_coords	Hairpin	published		valid	0-no_evidence					Y	PCG-UTR-exon	N	Not tested: not intergenic	3
PID0014	Lee2010-al	Necra	milR-13		NC_026501.1:357677-357877:+	GCF_000182925.2_NC12_genomic	CM002236.1:357723-357764:+	GCA_000182925.2_NC12	gene, TE	UGGGAAUGUGAGGCGUUUG	FALSE	CAGGAUACAAGGCGGGAGAAGAGAAACAUCGUUCUCGUUUGGGCAAAAGACGUUAUUGCAUCCCUUCAGUGGGAAUGUGAGGCGUUUGGAGCCCAGAUGAGUAACUCCCUACUGGUUUAUUGUUGCUUGAGAGUACCCAACAUCAAUCGACAUGGUUAGGUAGGGGACAUUCCAUAGUGUUCCUAUAAUACAAUUUUCUGU	.((((.(((....((((...((......))((((((((((((((...((((((..(((((((((......))).)))))).))))))...))))))))))).)))((((((((...((((.((((.((((..((.....)).)))).))))))))...))))))))...))))....))))))).................	-64.9	[46, 66, 67, 87]	41	2 invalid_coords	Hairpin	published		valid	0-no_evidence					Y	PCG-UTR-exon	N	Not tested: not intergenic	3
PID0015	Lee2010-al	Necra	milR-14		NC_026501.1:7485904-7486334:-	GCF_000182925.2_NC12_genomic	CM002236.1:7486130-7486185:-	GCA_000182925.2_NC12	gene, TE	UGCCGUGUCGUAGCAUCGAAGUCAA	FALSE	AUGAACUGGUUCUGACUCGUUUGUAACAACAGUGGUGACAAGAAGACCAAGGGCGCUGCUCUCGUCUUCUAAACGCCUUCCAUGGGAAGAAUGCGGUGGUAGCGAGGUUGCGAAGCCGGCACUGGUUUUCUUGACUGGUCUUGCAUGGGUUUGCCGUGUCGUAGCAUCGAAGUCAACGGACUGGCUUCGAUGUUGGCACGGGAAAGUUGGUCUUUGAGGUACAUGUACAAUGGACACGGAUGGUCGGGUGCGGGAAACGAACACAAUACCAUCUUUGGGGCGUUUCGUCUGCGGUUUCUAUCUACCAAUGCUGCCACCGUUUUCCUCGCAACUUUUUUCUACACAGUUUCUCCGCCUGGGGCAUCUUUUUGGUCAAGGGGUGAUGUGAGAUGUGUCCCG…	....((((......((......)).....))))((((...(((((((..(((((...))))).)))))))...)))).((((((.((.(((.((((((((((((.((((((((.(((((((..((....)))).))))).))))).((.(((.((((((((..((((((((((((......)))))))))))))))))))).))).)).((((.....(((....)))...))))..((((((..((.(((((((((((..(.(((........))))..))))))..))))).)).)))))))))..)))))))))))).))).)).)).........((((((....((((....)))).........(((((((((.((((((((..(........…	-157.4	[149, 175, 180, 204]	55	2 invalid_coords	Hairpin	published		valid	0-no_evidence					Y	PCG-UTR-exon	N	Not tested: not intergenic	3
PID0016	Lee2010-al	Necra	milR-15		NC_026506.1:3499896-3500036:-	GCF_000182925.2_NC12_genomic	CM002241.1:3499919-3500030:-	GCA_000182925.2_NC12	gene, TE	UUAUUUGCCAAAUCAACACUCGG	FALSE	GCUAACAAUUAUUUGCCAAAUCAACACUCGGAAAUAAGGUGUGGGCACGAGCUCUUGUUUACAGGGCCCUCGAGCUCUGGCUACCCCUUGUUGUCGAGUGUUGAUUCGGCAAAUAAUCGUUUCUUUGGUCAGCUGGGGGGA	...(((.((((((((((.(((((((((((((.(((((((.((((.((.((((((..((((...))))....)))))))).)))).))))))).))))))))))))).)))))))))).)))(((((((....)))))))..	-62.3	[6, 30, 93, 117]	111	2 invalid_coords	Hairpin	published		valid	0-no_evidence					Y	PCG-CDS-exon	N	Not tested: not intergenic	4
PID0017	Lee2010-al	Necra	milR-16		NC_026506.1:3877601-3877901:+	GCF_000182925.2_NC12_genomic	CM002241.1:3877689-3877780:+	GCA_000182925.2_NC12	gene, TE	UACUUGAUUCACAGCGUCUAUAC	FALSE	GAACUGGUCUUCAUGUUUUUCUUGGGUUUGUAUUUUCGGUCUCAUAGGCUAGGUAGGUAUCUAACAACAAACUGUUCCUCACACGAUAAUAUAGACGCUGGGAUCGGGUAGGUGAAGCAGGACGAAGCUAACUUUGGCUUGGUCCUGCUUUCCUACCUACUUGAUUCACAGCGUCUAUACUAUAGUGGGUUGAGCGGGUCGUUGCAUGGAUGUUACGAAUUAACGACCAUUUCAAAUCUGAAUCUUGUCUAGUAUCUUUACACAUUCAAGUCCCACGCUUCUUCAUUAUGGCUGCGAUGCU	(((.(((((((((((......((((((.(.(((((..(((((...)))))))))).).))))))((((...((((((..(.(((.(((.((((((((((((((((((((((((((((((((((.((((((....)))))).))))))))))...))))))))))))).))))))))))).))).))).)..))))))...)))))))))).((((.....))))))))).))).....(((((..(((..((...))..))).))))).....(((((..((.......))..))).))..	-106	[88, 111, 155, 179]	91	2 invalid_coords	Hairpin	published		valid	0-no_evidence					Y	none	Y	Y	2
PID0018	Lee2010-al	Necra	milR-17		NC_026503.1:3354067-3354267:-	GCF_000182925.2_NC12_genomic	CM002238.1:3354131-3354172:-	GCA_000182925.2_NC12	gene, TE	CGGCAUCAGCGUGUUCA	FALSE	AACGCACCUUAAAUCAACCGAGACUGACUGACUCCUCCACUCGCUGUCGGUCAAUAAGAGUGCAAGAGUAACUUGAGUCUCCUUCCCGCUAUCAACACGGCAUCAGCGUGUUCAUUUCCCAAUGGCUCUGAGACCGGUCGGCGGGGGGUUCUCUACAUCUCCAAUCCCAUCAAGCGACAGCAUGUGAACGGCAAUGAACUA	...((((((((.....(((((.(.(((.((.......)).))).).)))))...)))).))))..(((......(((....(((((((((....((.(((..((((.((...((((....)))))).))))..))))).)))))))))..))).....)))....((..(((.((....))...)))..))..........	-49.5	[95, 113, 122, 136]	41	2 invalid_coords	Hairpin	published		valid	0-no_evidence					Y	none	Y	Y	2
PID0019	Lee2010-al	Necra	milR-18		NC_026505.1:5351843-5351948:-	GCF_000182925.2_NC12_genomic	CM002240.1:5351884-5351937:-	GCA_000182925.2_NC12	gene, TE	UUGGCAGGAAUGUGGUGGACGAACA	FALSE	GAUUUGUUAUUUAUUGCGAGCACCAUUUUUCUUUUUUUCUUUGGCAGGAAUGUGGUGGACGAACAAGUACAAAUCGAACAUUUUCUGACUGCCAUCUACAUUUACC	(((((((.((((.((.((..((((((.(((((.((.......)).))))).))))))..)))).)))))))))))...............................	-20.7	[11, 38, 38, 64]	53	2 invalid_coords	Hairpin	published		valid	0-no_evidence					Y	PCG-UTR-exon	N	Not tested: not intergenic	3
PID0020	Lee2010-al	Necra	milR-19		NC_026502.1:2516248-2516498:+	GCF_000182925.2_NC12_genomic	CM002237.1:2516404-2516454:+	GCA_000182925.2_NC12	gene, TE	GAUACACGCUAGAUGUCCCU	FALSE	UUUUUGAUCUUUUUCUCUCAUUAUUGUACUACGGCCACUUAUUGUAGGGGGAUAUUGGUUCGCAAACUGUCCACGCUUUCGGGUAUGGCUUUUGCACGCUCUACGAGUGUUCCCCUCUAUCAUGUGUCCUAGAUAGAUUUUCUUUGGCUCCGUUUAUGGAUACACGCUAGAUGUCCCUUUCGAGGGCGUCUCUGAGCAGUGAUUCUUACCGCCGGUUGCCACAUCUCAUCACAACCAAAUUGACCUUGCGU	........................(((.(((.((.(((....((.(((((((((((.((..(((((..(.(((.(((....))).)))).))))).......)).))))))))))).))....))).))))))))(((......((((.(((.....(((..(((((((((((.((((....)))))))))...))).)))..)))......)))..))))......))).....................	-60.3	[156, 177, 182, 206]	50	2 invalid_coords	Hairpin	published		valid	0-no_evidence					Y	near-PCG	N	Not tested: not intergenic	3
PID0021	Lee2010-al	Necra	milR-20		-	GCF_000182925.2_NC12_genomic	-	-	-	UACUCUGUGUGCUCGGUGUGGUU	-	-	-	-	-	-	2 invalid_coords	Hairpin	published		secondary structure in duplex	-	-	-	-	-	-	not evaluated: hairpin invalid	-	-	-
PID0022	Lee2010-al	Necra	milR-21		-	GCF_000182925.2_NC12_genomic	-	-	-	AUCCUGGCUUCCUUUGCCUG	-	-	-	-	-	-	2 invalid_coords	Hairpin	published		secondary structure in duplex	-	-	-	-	-	-	not evaluated: hairpin invalid	-	-	-
PID0023	Lee2010-al	Necra	milR-22		-	GCF_000182925.2_NC12_genomic	-	-	-	UGGAGGGUGAUAUAUGGUUUGCCAG	-	-	-	-	-	-	2 invalid_coords	Hairpin	published		secondary structure in duplex	-	-	-	-	-	-	not evaluated: hairpin invalid	-	-	-
PID0024	Lee2010-al	Necra	milR-23		NC_026507.1:1962769-1962989:-	GCF_000182925.2_NC12_genomic	CM002242.1:1962900-1962958:-	GCA_000182925.2_NC12	gene, TE	UGCAAUCUAGUCGCGUUCCCUCUU	FALSE	CAUGUGUACGCAAAGCUAGCACGGAUGUCAAAUUGCAAUCUAGUCGCGUUCCCUCUUCAUGAGAGAACCAUCAAUGGCUAUGGUUGUGCCGAAGAUGUGCUGAAAUCAAACCUCACUCUGCAAGUAGCCUGGUAUCCGGGCACGUCGUCAUCAGGGACUCACUUUCUACGGCAAGGAGUCUGUUGCCGGCGGAUUGCGUACAUUUUAUCGUUCAACCUCGA	...((((((((((...(((((((....((....(((((((((((((.((((.(((.....))).))))......)))))).)))))))..))...)))))))........................((((((...)))))).(((((.((....((((((.(((.(....).)))))))))..)).)))))..))))))))))....(((........)))	-66	[31, 56, 58, 89]	58	2 invalid_coords	Hairpin	published		valid	0-no_evidence	RF01240	6.15e-09	Small nucleolar RNA snR85	snoRNA	Y	PCG-UTR-exon	N	Not tested: not intergenic	4
PID0025	Lee2010-al	Necra	milR-24		-	GCF_000182925.2_NC12_genomic	-	-	-	UGCGGGGCAUUGAGUGGUCGACG	-	-	-	-	-	-	2 invalid_coords	Hairpin	published		secondary structure in duplex	-	-	-	-	-	-	not evaluated: hairpin invalid	-	-	-
PID0026	Lee2010-al	Necra	milR-25		-	GCF_000182925.2_NC12_genomic	-	-	-	CGACGCGGAGAAGAAGGGGAUUG	-	-	-	-	-	-	2 invalid_coords	Hairpin	published		secondary structure in duplex	-	-	-	-	-	-	not evaluated: hairpin invalid	-	-	-
PID0027	Zhou2012-iu	Scscl	SS-milR-1		Supercontig_2.24:519173-519246:+	sclerotinia_sclerotiorum_2_supercontigs	CH476644.1:519181-519235:+	GCA_000146945.2_ASM14694v2	gene, TE	UCUCGAGCCGUAUAGACAGUGU	FALSE	GCAUCCGUCCUCUCGAGCCGUAUAGACAGUGUCAUUAUCGCUGCCAUUAUACGCUACGCCCCGCGGCUUGUGCA	((((((((.....(((((.((((((.(((((.......)))))...))))))))).))....))))...)))).	-21.7	[8, 31, 37, 62]	54	5 success	Coordinates	published		valid	1-fail					Y	none	Y	N	4
PID0028	Zhou2012-iu	Scscl	SS-milR-2		Supercontig_2.1:2205696-2205844:-	sclerotinia_sclerotiorum_2_supercontigs	CH476621.1:2205706-2205833:-	GCA_000146945.2_ASM14694v2	gene, TE	CUAUAUAAAGGAAAUCCAUC	FALSE	UAAGCAUAAAGCUCUAUAUAAAGGAAAUCCAUCUUGAUUAUAUAGAUCUUUGUAUUCUAACUCUAGAGAAUCUAAUUAGAGUCAUUAAAGCUAGAAUACAAAGGUCUAUAUAAUCAAGAUGGAUUUCCUUUAUAUAGAGCUUUAUGCUU	.((((((((((((((((((((((((((((((((((((((((((((((((((((((((((.((.(((.((.(((....))).)).))).)).))))))))))))))))))))))))))))))))))))))))))))))))))))))))))	-94.7	[11, 32, 117, 138]	127	5 success	Coordinates	published		valid	1-fail					Y	none	Y	N	4
PID0029	Zhou2012-iu	Scscl	SS-milR-C1		Supercontig_2.14:585654-585756:+	sclerotinia_sclerotiorum_2_supercontigs	CH476634.1:585664-585746:+	GCA_000146945.2_ASM14694v2	gene, TE	UUUCAGGGACAGGGAGCGGUUG	FALSE	AGGAUUGCAUCGUGACCGUUUUUUUGACUUCGGGAAGCUCUUGAAAUCCAUCGUUAGAUGCUGCCAGGGUCUUUCAGGGACAGGGAGCGGUUGAAGCAAGCCG	.((.((((.((..(((((((((((.(.(((..(((((.(((((.....((((....))))....))))).))))).))).)))))))))))))).)))).)).	-31.4	[10, 37, 69, 92]	82	5 success	Coordinates	published		valid	2-pass					Y	PCG-intron	N	Not tested: not intergenic	3
PID0030	Zhou2012-iu	Scscl	SS-milR-C2	a	Supercontig_2.14:1125303-1125543:-	sclerotinia_sclerotiorum_2_supercontigs	CH476634.1:1125313-1125359:-	GCA_000146945.2_ASM14694v2	gene, TE	GGUGUUGUGGUUUAGUGGUAUAAUUC	TRUE	UGCAGAUGAUUUAUGGCAUCAGACGAUUACAUCAUGGACCAAAGAUAUCCUAGAGUACACCAACAGAGUUUGCCUUGGGUACGUCAAUGACACCUUCGUCCUUCAAAUCACGUUCAAAGAUUUGAUUAACUCUCUAGUUGUAUGGAUUUCUGACACAUUUGUGGAUGAGAAUAUAUAAUGAAACGUGCAUCAGACUCAACACACUAAACGGGUGUUGUGGUUUAGUGGUAUAAUUCUUGCU	.(((((((........)))).(((((.....((((.(((....(.(((((.((.(((.(((....).)).))))).))))))))).)))).....)))))..(((((((.........)))))))...........((((((((..((((...(((....)))...)))).))))))))(((..((((((.(((((((((((.((....)))))))).))))).)).))))..))).))).	-53.1	[184, 205, 208, 230]	46	5 success	Coordinates	published		valid	2-pass	RF00005	7.97e-11	tRNA	tRNA	Y	none	Y	N	4
PID0031	Zhou2012-iu	Scscl	SS-milR-C2	b	-	sclerotinia_sclerotiorum_2_supercontigs	-	-	-	GGUGUUGUGGUUUAGUGGUAU	-	-	-	-	-	-	5 success	Coordinates	published		secondary structure in duplex	-	-	-	-	-	-	not evaluated: hairpin invalid	-	-	-
PID0032	Zhou2012-iu	Scscl	SS-milR-C3		Supercontig_2.2:2714777-2714918:+	sclerotinia_sclerotiorum_2_supercontigs	CH476622.1:2714785-2714847:+	GCA_000146945.2_ASM14694v2	gene, TE	UAGGAGUUUGAUAGGCAAGUU	TRUE	UCUAUAAGUAUAGGAGUUUGAUAGGCAAGUUUAUUCUUACAAAGAAUAGCUUUGAUUGUUAUACUUUUAUCUUUAAGAAGCUUGUUAAGAUCCAAAUAUCUCAUAUCUCGGAUCUGGCCUAGAAAGGAGUCUUUCUUUAGAU	(((..(((.((((((((.(((((..((((.((((((((...)))))))).))))..))))).)))))))))))..))).(((.....((((((................)))))))))..((((((....))))))......	-32.3	[8, 29, 49, 70]	62	5 success	Coordinates	published		valid	2-pass					Y	none	Y	N	3
PID0033	Zhou2012-iu	Scscl	SS-milR-C4		Supercontig_2.18:271531-271740:-	sclerotinia_sclerotiorum_2_supercontigs	CH476638.1:271550-271732:-	GCA_000146945.2_ASM14694v2	gene, TE	UGAGAUGGUAAACUAAGUAAUA	FALSE	AUACAAAGAGUGAGAUGGUAAACUAAGUAAUAUGUUAAAGUGAAUGGUUCCUGUGUAGCACGUGCACAGGGCACUAGUCCUAUUAGGACUAGAUUGAGAAGCUCUCUUACAGAGAGCUUCGCACUUCCGUAGAACUUAAAAGAGAGAUUAAUCUACAAGACCAAUAUUACCUCAGUUCUGCCCUAUCAGCUUCCCACUAUUCCCUGUGUG	.......((((((...((((((((..(((((((...........(((((((((((((.....))))))))...((((((((...))))))))..((.((((((((((...)))))))))).)).....(((((..((((........)))))))))..))))))))))))...)))).))))...))).)))..(((........)))..	-61.6	[8, 31, 164, 190]	182	5 success	Coordinates	published		valid	1-fail					Y	none	Y	N	4
PID0034	Zhou2012-iu	Scscl	SS-milR-C5		Supercontig_2.18:871333-871491:-	sclerotinia_sclerotiorum_2_supercontigs	CH476638.1:871352-871483:-	GCA_000146945.2_ASM14694v2	gene, TE	UGGAGUGGAAUUGACGGAUGG	FALSE	CCGAACGAUUUGGAGUGGAAUUGACGGAUGGGGUGGUGAAGGUUGAUGUAAUGUUUUCACCAGUCAUACCGGUGAAUUGUUCAAGCUUUCGACGAACUGCUUCAUAUUUAGAUGCCAUAUUCGCCAAUUGUAAUUCCAGAUCACGAUUUCUACGUUCGA	.((((((((((((((((.(((((.((((((.((((...(((..(((.(((.....((((((.((...)).))))))..((((...........))))))).)))..)))...)))).)))))).))))).).))))))))))...........))))).	-42	[8, 30, 116, 139]	131	5 success	Coordinates	published		valid	2-pass					Y	PCG-CDS-exon	N	Not tested: not intergenic	4
PID0035	Zhou2012-iu	Scscl	SS-milR-C6		-	sclerotinia_sclerotiorum_2_supercontigs	-	-	-	UGAAAUGCUGGCGAUUUAUGA	-	-	-	-	-	-	5 success	Coordinates	published		secondary structure in duplex	-	-	-	-	-	-	not evaluated: hairpin invalid	-	-	-
PID0036	Zhou2012-iu	Scscl	SS-milR-C7		Supercontig_2.22:748995-749297:+	sclerotinia_sclerotiorum_2_supercontigs	CH476642.1:749113-749287:+	GCA_000146945.2_ASM14694v2	gene, TE	UGAGGUAUAUUAUAGAGUUUU	FALSE	AGGGAGCGAAGGAGCGAGAUUCGAAUCUCGCUCCUUCGCUCCCUCGCUCCAACCCAAUGUUGGAGCACGAAGGUCUAUAUAAUCAAGAUGGAUUUCCUUUGUAUAGAGCUUCGUGCUCAAGAUCAAUCAUUUAGUAUACUCUACUAUUAGUUACGAAUUGCAUUAUUGUCAUUACUUUAAGUCCCUGCUUAACGUCUAGUUAUAAACCACCUCGAGAGCCUAGAGCACUUCCACGUGAUCUAGACGGCAAACUUCGUAACAUAAAGGUAGUAUGAGGUAUAUUAUAGAGUUUUGCAGCUUUCC	((((((((((((((((((((....)))))))))))))))))))).((((((((.....))))))))((((((.(((((((((....((......))..))))))))).))))))(((((((((...((...((((((((((((((.(((((((((((((((...............((((((....))))))(((((((((((.......(((.........))).........)))).)))))))))))..)))))))).))).))))).....)))))))))..)))))))).))).....	-114.9	[118, 144, 270, 292]	174	5 success	Coordinates	published		valid	1-fail					Y	none	Y	N	4
PID0037	Zhou2012-iu	Scscl	SS-milR-C8		-	sclerotinia_sclerotiorum_2_supercontigs	-	-	-	UGUUAGUAUUGAGGAUGGCU	-	-	-	-	-	-	5 success	Coordinates	published		secondary structure in duplex	-	-	-	-	-	-	not evaluated: hairpin invalid	-	-	-
PID0038	Zhou2012-iu	Scscl	SS-milR-C9		Supercontig_2.19:161710-161926:+	sclerotinia_sclerotiorum_2_supercontigs	CH476639.1:161719-161916:+	GCA_000146945.2_ASM14694v2	gene, TE	UAAAGUUGAUUGUAAAAGAG	FALSE	AUAAUUGAGUUUUUUUAACAUAUCAACAUUUGCUUAAUACCUUAUUUACCUUUCGAAGUAUAUGAAUCUCUAUAUUUAAAAGUAUAUUCUCAUAAACUAAUCAUUUUGUACCCUUAGUUAAUAUAAUUAUAAUUUCAAAUAUAAAUAUAAAAGAAUUUGAUUGAUAUCAAACAAUUCGAGAUUUCACUAAAGUUGAUUGUAAAAGAGCUUCAAUUGG	.((((((((((((((((.((.((((((...(((((....................)))))...((((((((((((((.(((.((((........((((((.............))))))........)))).))).))))))).........(((((((((....))))...)))))))))))).......))))))))))))))))).))))))).	-31.4	[9, 32, 185, 206]	197	5 success	Coordinates	published		valid	1-fail					Y	none	Y	N	4
PID0039	Zhou2012-iu	Scscl	SS-milR-C10		Supercontig_2.18:664837-664987:-	sclerotinia_sclerotiorum_2_supercontigs	CH476638.1:664845-664979:-	GCA_000146945.2_ASM14694v2	gene, TE	UACUGUUAGUUACGAAUUGCAUA	FALSE	UAGUAUACUCUACUGUUAGUUACGAAUUGCAUAUCAUAAUUGUCAUUACUUAAGUCCCUGCUUGACGCCUAGUUAUAAACCACCUCGAGAGCCUAGAGCACUUCCACGUGAUCUAGAUGGCAAACCUCGUAACAUCUAGUAGGUUAAUCUC	........(((((((...(((((((.((((.((((.((...(((((.....((((....((((...((((.(.............).)).))...))))))))....))))).))))))))))...)))))))...)))))))........	-28.3	[8, 32, 117, 142]	134	5 success	Coordinates	published		valid	1-fail					Y	none	Y	N	4
PID0040	Zhou2012-iu	Scscl	SS-milR-C11		Supercontig_2.4:1130546-1130887:-	sclerotinia_sclerotiorum_2_supercontigs	CH476624.1:1130555-1130879:-	GCA_000146945.2_ASM14694v2	gene, TE	UGCUCUAGACUCUCGAGGUGG	FALSE	CAUGUGGAAGUGCUCUAGACUCUCGAGGUGGUUUAUAACUAGGUGUUACGACGGAUCUCACAUACCUAACAUCACGUGAUUAGCAUCAUGUGAUAUGAGGAUCCCAGUAGGCUCAGCUGUCCCAGUACAACUGGGACAACUGGGAGCACUGGGACGCAUGCCACGAUGGUCUAUAUAAUCAAGAUGGAUUUCCUUUGUAUAGAGCUUCGUGCUCAAGAUCAAUCAUUUAGUAUACUCUACUAUUAGUUAUGAAUUCGCAUCUCAUUAUUGUCCUUACUCUCGAGUCCCUGCUUGACGCCUAGUUAUAAACCUACUUCGAGAGCCUAGAGCACUUCCACGUGA	((((((((((((((((((.(((((((((((((((((((((((((((((.(..((..(((.....(((...((((((((((....))))))))))...))).(((((((...(((((.(((((((((...))))))))).)))))...))))))).....((.((((.(.(((((((((....((......))..))))))))).).))))))...............(((((.....))))).((((.((((.........)))).))))...........)))..))..).))))))))))))))))))).)))))))))).)))))))))))))))))).	-156.4	[8, 30, 309, 332]	324	5 success	Coordinates	published		valid	2-pass					Y	none	Y	N	3
PID0041	Zhou2012-iu	Scscl	SS-milR-C12		-	sclerotinia_sclerotiorum_2_supercontigs	-	-	-	UCGACUAGAAGAUGCUUCCCCA	-	-	-	-	-	-	5 success	Coordinates	published		secondary structure in duplex	-	-	-	-	-	-	not evaluated: hairpin invalid	-	-	-
PID0042	Zhou2012-iu	Scscl	SS-milR-C13		Supercontig_2.29:57201-57352:-	sclerotinia_sclerotiorum_2_supercontigs	CH476649.1:57211-57342:-	GCA_000146945.2_ASM14694v2	gene, TE	UUCUGAUUUUGAUUUCCUUUC	FALSE	CUAAGGGAGAGAAAGGGGUAGGGGAGUCGGUUAUUUGUGUAUUGGAUGAUGGCUUUGAGUAUUCAGCCUUUAUACAAAUAGAGUUUCUGUUUUCGAGAUAUAUCUUCUAGAUUGUCUAAUAUUCUGAUUUUGAUUUCCUUUCUUUCUCUUAU	.(((((((((((((((((....((((((((.((((((((((..((.(((..(((...)))..))).))..))))))))))(((........))).(((((.((((...)))))))))......))))))))...))))))))))))))))).	-48.5	[10, 33, 119, 141]	131	5 success	Coordinates	published		valid	1-fail					Y	none	Y	N	4
PID0043	Zhou2012-iu	Scscl	SS-milR-C14		Supercontig_2.22:138314-138505:+	sclerotinia_sclerotiorum_2_supercontigs	CH476642.1:138322-138475:+	GCA_000146945.2_ASM14694v2	gene, TE	UCGACGACAGUAUCACAACAACU	FALSE	GUUUAGAGCGUCGACGACAGUAUCACAACAACUACUGGUCAGAAUCACUUGGGGACAAUUGUAAUAAAUUUGGUUUAAUGACUAUGAUCUAGAUCGAUCGUGAAAUUGUCGUAUUUCGAAGAAAAAGAUUUCUUCAAAAUUUGUUGUGGCUGUUGAUGGACGUUGGUGUUGUACGCUGAAUAUUGCUGAACA	((((((((((((.((((((((..((((((((.....(((((((((((..(....((....)).....)..))))))..)))))((((((......))))))(((((......)))))(((((((....))))))).....))))))))))))))).).))))))(((((...)))))........)))))).	-52.9	[8, 32, 138, 161]	153	5 success	Coordinates	published		valid	1-fail					Y	TE	N	Not tested: not intergenic	4
PID0044	Zhou2012-iu	Scscl	SS-milR-C15		Supercontig_2.15:257840-258007:+	sclerotinia_sclerotiorum_2_supercontigs	CH476635.1:257851-257997:+	GCA_000146945.2_ASM14694v2	gene, TE	UGACAAAAAUUAGGGCAGACACC	FALSE	GUACCUACGGAGGUGUCUGCCCUAAUUUUUGUCACCGCCUUUUGCAUGCAGAGAUGGUAAAACACGUAAAUCACCUCGAUCCGCCUCAAUAUCAUCGAGAAAUCAAGCAAAUAAUAUUGCCGGCAGAAAAAGCGGUGACAAAAAUUAGGGCAGACACCUCCGUAGGUA	.(((((((((((((((((((((((((((((((((((((.((((((..(((..(((((((......((..(((.....)))..)).....)))))))((....)).............)))..))))))...)))))))))))))))))))))))))))))))))))))	-87.9	[11, 35, 133, 157]	146	5 success	Coordinates	published		valid	1-fail					Y	none	Y	N	4
PID0045	Zhou2012-iu	Scscl	SS-milR-C16	a	Supercontig_2.29:186906-187126:-	sclerotinia_sclerotiorum_2_supercontigs	CH476649.1:186916-187117:-	GCA_000146945.2_ASM14694v2	gene, TE	UGUGGAGUAGAAGGUUGCUG	FALSE	AGGCUAUCUCAGCAUUUUGAGAUUCUACAAGUUUAGUCAUUCUCUUGGCAUAUCGACGAGUUGGUGAUACAGGAGAACCACUACUUGCUAAAGCUGUAUUAAAGAUCUGAUUUGCUUGCAUUAGUUCUGUCCCAUCUGGAAGAGAACUUCUGAGUAUAGAUAAGUCUAGGUCUUAAUUGGGGGUUCUCAUUUGUGGAGUAGAAGGUUGCUGGGAGGAGUUA	.((((.((((((((.(((...(((((((((((...((((((..((((.........))))..))))))....(((((((.((((((....)))........(((((((((((((((..((..((((((.(.((....)).).))))))..)).....)).)))))).)))))))...))).))))))))))))))))))...))).))))))))..)))).	-66.1	[9, 30, 189, 210]	201	5 success	Coordinates	published		valid	1-fail					Y	TE	N	Not tested: not intergenic	4
PID0046	Zhou2012-iu	Scscl	SS-milR-C16	b	Supercontig_2.19:406801-407021:-	sclerotinia_sclerotiorum_2_supercontigs	CH476639.1:406811-407012:-	GCA_000146945.2_ASM14694v2	gene, TE	UGUGGAGUAGAAGGUUGCUG	FALSE	GGGCUAUCUCAGCAUUUUGAGAUUCUACAAGCCUAGUCAUUCUCUUGGCAUAUCGACGAGUUGGUGAUACAAGAGAAUCAUUAUCUGCUAGAGCUUUAUUAAAGGUUUGAUUUGCUUGCCUUAGCUCUGUCCCAUCUGGAGGAGAGCUCCUGAGUAUAGAUAAGUCUAGAUCUUGAUUGGACAUUCUCAUUUGUGGAGUAGAAGGUUGCUGGGAGGAGUUA	.((((.((((((((.(((...(((((((((((.((((.(((((((((...((((((....))))))...))))))))).))))...)))((((((......(((((..(.....)..)))))))))))((((.(((.((((.....)))).((...((((....))))..))..))).)))).........))))))))...))).))))))))..)))).	-65.6	[9, 30, 189, 210]	201	5 success	Coordinates	published		valid	1-fail					Y	TE	N	Not tested: not intergenic	4
PID0047	Zhou2012-iu	Scscl	SS-milR-C16	c	Supercontig_2.20:697673-697893:+	sclerotinia_sclerotiorum_2_supercontigs	CH476640.1:697682-697883:+	GCA_000146945.2_ASM14694v2	gene, TE	UGUGGAGUAGAAGGUUGCUG	FALSE	GGGCUAUCUCAGCAUUUUGAGAUUCUACAAGCCUAGUCAUUCUCUUGGUAUAUCGACGAGUUGGUGAUGCAAGAGAAUCAUUAUCUGCUAGAGCUUUAUUAAAGGUUUGAUUUGCUUGCCUUAGCUUUGUCCCAUCUGGAGGAGAGCUCCUGAGUAUAGAUAAGUCUAGAUCUUGAUUGGACAUUCUCAUUUGUGGAGUAGAAGGUUGCUGGGAGGAGUUA	.((((.((((((((.(((...(((((((((((.((((.(((((((((...((((((....))))))...))))))))).))))...))).(((((......(((((..(.....)..))))))))))(((((.(((.((((.....)))).((...((((....))))..))..))).)))))........))))))))...))).))))))))..)))).	-63.2	[9, 30, 189, 210]	201	5 success	Coordinates	published		valid	1-fail					Y	TE	N	Not tested: not intergenic	4
PID0048	Zhou2012-iu	Scscl	SS-milR-C16	e	Supercontig_2.33:2230-2450:+	sclerotinia_sclerotiorum_2_supercontigs	CH476628.1:1566525-1566726:-	GCA_000146945.2_ASM14694v2	gene, TE	UGUGGAGUAGAAGGUUGCUG	FALSE	GGGCUAUCUCAGCAUUUUGAGAUUCUACAAGCCUAGUCAUUCUCUUGGUAUAUCGACGAGUUAGUGAUGCAAGAGAAUCAUUAUCUGCUAGAGCUUUAUUAAAGGUUUGAUUUGCUUGCCUUAGCUCUGUUCCAUCUGGAGGAGAGCUCCUGAGUAUAGAUAAGUCUAGAUCUUGAUUGGACAUUCUCAUUUGUGGAGUAGAAGGUUGCUGGGAGGAGUUA	.((((.((((((((.(((...((((((((((((((((.(((((((((...((((.((......)))))))))))))))........))))).))((((...(((((((((((((((((((..((((((.((((....)))).))))))...).))).)).)))))).)))))))...)))).........)))))))))...))).))))))))..)))).	-67.5	[9, 30, 189, 210]	201	5 success	Coordinates	published		valid	1-fail					Y	TE	N	Not tested: not intergenic	4
PID0049	Zhou2012-iu	Scscl	SS-milR-C16	d	Supercontig_2.8:1566515-1566735:-	sclerotinia_sclerotiorum_2_supercontigs	CH476628.1:1566525-1566726:-	GCA_000146945.2_ASM14694v2	gene, TE	UGUGGAGUAGAAGGUUGCUG	FALSE	GGGCUAUCUCAGCAUUUUGAGAUUCUACAAGCCUAGUCAUUCUCUUGGUAUAUCGACGAGUUAGUGAUGCAAGAGAAUCAUUAUCUGCUAGAGCUUUAUUAAAGGUUUGAUUUGCUUGCCUUAGCUCUGUUCCAUCUGGAGGAGAGCUCCUGAGUAUAGAUAAGUCUAGAUCUUGAUUGGACAUUCUCAUUUGUGGAGUAGAAGGUUGCUGGGAGGAGUUA	.((((.((((((((.(((...((((((((((((((((.(((((((((...((((.((......)))))))))))))))........))))).))((((...(((((((((((((((((((..((((((.((((....)))).))))))...).))).)).)))))).)))))))...)))).........)))))))))...))).))))))))..)))).	-67.5	[9, 30, 189, 210]	201	5 success	Coordinates	published		valid	1-fail					Y	TE	N	Not tested: not intergenic	4
PID0050	Zhou2012-iu	Scscl	SS-milR-C17		Supercontig_2.1:1095959-1096308:-	sclerotinia_sclerotiorum_2_supercontigs	CH476621.1:1095967-1096300:-	GCA_000146945.2_ASM14694v2	gene, TE	GAUGGAUGGAUGGAUGGAUAA	FALSE	AGAAUGGAUAGAUGGAUGGAUGGAUGGAUAAAUAGAUAGAUAGAUGAAUCUGGGAGGAAAAAUUAUAGAGUUGGAUAUUAUAGAUCCUAUAGAUUUUGUAAGGAAUUGUCUAGGAACUCACUAAGCAUUAGUAAGGUACAUAAUAAAAUAUAUCAGUGAAGCUUGUGUCAGACCAGCUCAUUUUUGAUAAAUGUGAAUACUGAUAAUUCUAAUAAUAUCAUUUUCAAUCCGUGAAUUACCAUGAUGAAAUAUAUGAACAUAUAUCUCCAAUUCAUUCAGACCCACAUCAUAUCAUAUCAUUCAUGUCAUUCAUCUCCAACCAUACCAUCCAUCUUCACGCAAUCCAAUCA	.((.(((((((((((((((((((.((((......((((((((((((..((((((.(((.........(((...((((((((((((((((..((((((....))))))...))))).((.(((((...))))).))...............((((((((..((...(((((((..........)))))))...))...))))))))..))).))))))))...)))....((((......))))..((.((((((....)))))).))...))).))))))....)))).)))).))))....(((.....))).)))).)))).)))))))))).......))))).)).	-80.6	[8, 30, 311, 341]	333	5 success	Coordinates	published		valid	1-fail					Y	near-PCG	N	Not tested: not intergenic	4
PID0051	Zhou2012-iu	Scscl	SS-milR-C18		Supercontig_2.40:274873-275061:+	sclerotinia_sclerotiorum_2_supercontigs	CH476624.1:1648161-1648332:+	GCA_000146945.2_ASM14694v2	gene, TE	UGGUACUUACCACGAUCUCGG	FALSE	CUCUGGCUCGAUGUCCUGGUUUGCCGCAUUCGAAGCAGAGUUUGUCCUUGCAUCUUCGUUCUACAUCUUCCUUAGGUAGUUUGUUCUUGAAUGUUGCAUCCAAUUGCAUUGGAUCUCCAUAUUGUUGUCUGUUCUCUCGAGGUCUUCCUUCAUUCUUGUGGUACUUACCACGAUCUCGGUUUCCAUGAA	.(((((.((((.(((.((((.(((((((...((((.(((.((((.....(((.(((((....(((.((.((...)).))..)))...)))).).)))(((((((...))))))).......................)))).)))..)))).....)))))))...)))).))).))))...))).)).	-41	[7, 27, 156, 178]	171	3 invalid_sequence	Hairpin	published		valid	1-fail					Y	TE	N	Not tested: not intergenic	4
PID0052	Zhou2012-iu	Scscl	SS-milR-C19		Supercontig_2.2:181216-181349:-	sclerotinia_sclerotiorum_2_supercontigs	CH476622.1:181243-181341:-	GCA_000146945.2_ASM14694v2	gene, TE	UAUGUAGGACUUGGUAGGUAUA	FALSE	UGGCAUAGAUUAUGUAGGACUUGGUAGGUAUAUCUUUUCCCUGGUUUUCAUUAUCUCCAAAACUAAGUAUAUAUAUUUAUGCAUGUAUCUAUCAUAUCCUACAUCCUCAACUAUUCAUCCUAUUAUUCCGCCAG	((((((((...((((((((..((((((((((((........(((((((..........))))))).(((((......)))))))))))))))))..))))))))......))))...............)))).	-30.8	[8, 31, 83, 106]	98	5 success	Coordinates	published		valid	1-fail					Y	none	Y	N	4
PID0053	Zhou2012-iu	Scscl	SS-milR-C20	a	Supercontig_2.13:180208-180502:+	sclerotinia_sclerotiorum_2_supercontigs	CH476622.1:1900520-1900795:+	GCA_000146945.2_ASM14694v2	gene, TE	UGAUGGGGAAGAUGAGAGUU	FALSE	UUAACGAUGAUGAUGGGGAAGAUGAGAGUUCUGACUCCGGUAAUGAUGGUAUAGGAACAUCUCCAGUAGAUUGUCUUGUAAGUGCUUCUGGUGAUAAGGUUGCUCUAGGCGUUGGCAAUUGAGGGUUAGUUUGAGGAACCCCCUCAUUGGUUGGAAUACCAUCAUCCGUCUUGUUUGAAGAGCUUUCAUUCGUUGGUCGCUCGUUUAAGCGAUUGUGUUGUAAGUUCCAUGGCCCUUCAACUACAAUUAUAUCACCAAUACUCUCAUCUGAUUCUUCACUCAACAGAUUCGAUAU	....(((((.(((((((((((((((((((..((....(((..((((((((((...((((((.((((.(((((........))).)).)))).)))...(((((.(........))))))((((((...((((...)))).))))))...)))...)))))))))))))....(((((((((((..(((.....)))..)))).)))))))((((((((((.(((..........))))))).)))))).......))..))))))))))...)))))).))).))...)))....	-82.1	[8, 29, 258, 283]	275	5 success	Coordinates	published		valid	1-fail					Y	TE	N	Not tested: not intergenic	4
PID0054	Zhou2012-iu	Scscl	SS-milR-C20	b	Supercontig_2.13:980359-980653:+	sclerotinia_sclerotiorum_2_supercontigs	CH476622.1:1900520-1900795:+	GCA_000146945.2_ASM14694v2	gene, TE	UGAUGGGGAAGAUGAGAGUU	FALSE	UUAACGAUGAUGAUGGGGAAGAUGAGAGUUCUGACUCCGGUAAUGAUGGUAUAGGAACAUCUCCAGUAGAUUGUCUUGUAAGUGCUUCUGGUGAUAAGGUUGCUCUAGGCGUUGGCAAUUGAGGGUUAGUUUGAGGAACCCCCUCAUUGGUUGGAAUACCAUCAUCCGUCUUGUUUGAAGAGCUUUCAUUCGUUGGUCGCUCGUUUAAGCGAUUGUGUUGUAAGUUCCAUGGCCCUUCAACUACAAUUAUAUCACCAAUACUCUCAUCUGAUUCUUCACUCAACAGAUUCGAUAU	....(((((.(((((((((((((((((((..((....(((..((((((((((...((((((.((((.(((((........))).)).)))).)))...(((((.(........))))))((((((...((((...)))).))))))...)))...)))))))))))))....(((((((((((..(((.....)))..)))).)))))))((((((((((.(((..........))))))).)))))).......))..))))))))))...)))))).))).))...)))....	-82.1	[8, 29, 258, 283]	275	5 success	Coordinates	published		valid	1-fail					Y	TE	N	Not tested: not intergenic	4
PID0055	Zhou2012-iu	Scscl	SS-milR-C20	c	Supercontig_2.14:563047-563341:-	sclerotinia_sclerotiorum_2_supercontigs	CH476622.1:1900520-1900795:+	GCA_000146945.2_ASM14694v2	gene, TE	UGAUGGGGAAGAUGAGAGUU	FALSE	UUAACGAUGAUGAUGGGGAAGAUGAGAGUUCUGACUCCGGUAAUGAUGGUAUAGGAACAUCUCCAGUAGAUUGUCUUGUAAGUGCUUCUGGUGAUAAGGUUGCUCUAGGCGUUGGCAAUUGAGGGUUAGUUUGAGGAACCCCCUCAUUGGUUGGAAUACCAUCAUCCGUCUUGUUUGAAGAGCUUUCAUUCGUUGGUCGCUCGUUUAAGCGAUUGUGUUGUAAGUUCCAUGGCCCUUCAACUACAAUUAUAUCACCAAUACUCUCAUCUGAUUCUUCACUCAACAGAUUCGAUAU	....(((((.(((((((((((((((((((..((....(((..((((((((((...((((((.((((.(((((........))).)).)))).)))...(((((.(........))))))((((((...((((...)))).))))))...)))...)))))))))))))....(((((((((((..(((.....)))..)))).)))))))((((((((((.(((..........))))))).)))))).......))..))))))))))...)))))).))).))...)))....	-82.1	[8, 29, 258, 283]	275	5 success	Coordinates	published		valid	1-fail					Y	TE	N	Not tested: not intergenic	4
PID0056	Zhou2012-iu	Scscl	SS-milR-C20	d	Supercontig_2.21:22662-22956:+	sclerotinia_sclerotiorum_2_supercontigs	CH476622.1:1900520-1900795:+	GCA_000146945.2_ASM14694v2	gene, TE	UGAUGGGGAAGAUGAGAGUU	FALSE	UUAACGAUGAUGAUGGGGAAGAUGAGAGUUCUGACUCCGGUAAUGAUGGUAUAGGAACAUCUCCAGUAGAUUGUCUUGUAAGUGCUUCUGGUGAUAAGGUUGCUCUAGGCGUUGGCAAUUGAGGGUUAGUUUGAGGAACCCCCUCAUUGGUUGGAAUACCAUCAUCCGUCUUGUUUGAAGAGCUUUCAUUCGUUGGUCGCUCGUUUAAGCGAUUGUGUUGUAAGUUCCAUGGCCCUUCAACUACAAUUAUAUCACCAAUACUCUCAUCUGAUUCUUCACUCAACAGAUUCGAUAU	....(((((.(((((((((((((((((((..((....(((..((((((((((...((((((.((((.(((((........))).)).)))).)))...(((((.(........))))))((((((...((((...)))).))))))...)))...)))))))))))))....(((((((((((..(((.....)))..)))).)))))))((((((((((.(((..........))))))).)))))).......))..))))))))))...)))))).))).))...)))....	-82.1	[8, 29, 258, 283]	275	5 success	Coordinates	published		valid	1-fail					Y	TE	N	Not tested: not intergenic	4
PID0057	Zhou2012-iu	Scscl	SS-milR-C20	e	Supercontig_2.22:309441-309735:+	sclerotinia_sclerotiorum_2_supercontigs	CH476622.1:1900520-1900795:+	GCA_000146945.2_ASM14694v2	gene, TE	UGAUGGGGAAGAUGAGAGUU	FALSE	UUAACGAUGAUGAUGGGGAAGAUGAGAGUUCUGACUCCGGUAAUGAUGGUAUAGGAACAUCUCCAGUAGAUUGUCUUGUAAGUGCUUCUGGUGAUAAGGUUGCUCUAGGCGUUGGCAAUUGAGGGUUAGUUUGAGGAACCCCCUCAUUGGUUGGAAUACCAUCAUCCGUCUUGUUUGAAGAGCUUUCAUUCGUUGGUCGCUCGUUUAAGCGAUUGUGUUGUAAGUUCCAUGGCCCUUCAACUACAAUUAUAUCACCAAUACUCUCAUCUGAUUCUUCACUCAACAGAUUCGAUAU	....(((((.(((((((((((((((((((..((....(((..((((((((((...((((((.((((.(((((........))).)).)))).)))...(((((.(........))))))((((((...((((...)))).))))))...)))...)))))))))))))....(((((((((((..(((.....)))..)))).)))))))((((((((((.(((..........))))))).)))))).......))..))))))))))...)))))).))).))...)))....	-82.1	[8, 29, 258, 283]	275	5 success	Coordinates	published		valid	1-fail					Y	TE	N	Not tested: not intergenic	4
PID0058	Zhou2012-iu	Scscl	SS-milR-C20	f	Supercontig_2.23:588107-588401:+	sclerotinia_sclerotiorum_2_supercontigs	CH476622.1:1900520-1900795:+	GCA_000146945.2_ASM14694v2	gene, TE	UGAUGGGGAAGAUGAGAGUU	FALSE	UUAACGAUGAUGAUGGGGAAGAUGAGAGUUCUGACUCCGGUAAUGAUGGUAUAGGAACAUCUCCAGUAGAUUGUCUUGUAAGUGCUUCUGGUGAUAAGGUUGCUCUAGGCGUUGGCAAUUGAGGGUUAGUUUGAGGAACCCCCUCAUUGGUUGGAAUACCAUCAUCCGUCUUGUUUGAAGAGCUUUCAUUCGUUGGUCGCUCGUUUAAGCGAUUGUGUUGUAAGUUCCAUGGCCCUUCAACUACAAUUAUAUCACCAAUACUCUCAUCUGAUUCUUCACUCAACAGAUUCGAUAU	....(((((.(((((((((((((((((((..((....(((..((((((((((...((((((.((((.(((((........))).)).)))).)))...(((((.(........))))))((((((...((((...)))).))))))...)))...)))))))))))))....(((((((((((..(((.....)))..)))).)))))))((((((((((.(((..........))))))).)))))).......))..))))))))))...)))))).))).))...)))....	-82.1	[8, 29, 258, 283]	275	5 success	Coordinates	published		valid	1-fail					Y	TE	N	Not tested: not intergenic	4
PID0059	Zhou2012-iu	Scscl	SS-milR-C20	g	Supercontig_2.26:224243-224537:+	sclerotinia_sclerotiorum_2_supercontigs	CH476622.1:1900520-1900795:+	GCA_000146945.2_ASM14694v2	gene, TE	UGAUGGGGAAGAUGAGAGUU	FALSE	UUAACGAUGAUGAUGGGGAAGAUGAGAGUUCUGACUCCGGUAAUGAUGGUAUAGGAACAUCUCCAGUAGAUUGUCUUGUAAGUGCUUCUGGUGAUAAGGUUGCUCUAGGCGUUGGCAAUUGAGGGUUAGUUUGAGGAACCCCCUCAUUGGUUGGAAUACCAUCAUCCGUCUUGUUUGAAGAGCUUUCAUUCGUUGGUCGCUCGUUUAAGCGAUUGUGUUGUAAGUUCCAUGGCCCUUCAACUACAAUUAUAUCACCAAUACUCUCAUCUGAUUCUUCACUCAACAGAUUCGAUAU	....(((((.(((((((((((((((((((..((....(((..((((((((((...((((((.((((.(((((........))).)).)))).)))...(((((.(........))))))((((((...((((...)))).))))))...)))...)))))))))))))....(((((((((((..(((.....)))..)))).)))))))((((((((((.(((..........))))))).)))))).......))..))))))))))...)))))).))).))...)))....	-82.1	[8, 29, 258, 283]	275	5 success	Coordinates	published		valid	1-fail					Y	TE	N	Not tested: not intergenic	4
PID0060	Zhou2012-iu	Scscl	SS-milR-C20	h	Supercontig_2.2:1900512-1900806:+	sclerotinia_sclerotiorum_2_supercontigs	CH476622.1:1900520-1900795:+	GCA_000146945.2_ASM14694v2	gene, TE	UGAUGGGGAAGAUGAGAGUU	FALSE	UUAACGAUGAUGAUGGGGAAGAUGAGAGUUCUGACUCCGGUAAUGAUGGUAUAGGAACAUCUCCAGUAGAUUGUCUUGUAAGUGCUUCUGGUGAUAAGGUUGCUCUAGGCGUUGGCAAUUGAGGGUUAGUUUGAGGAACCCCCUCAUUGGUUGGAAUACCAUCAUCCGUCUUGUUUGAAGAGCUUUCAUUCGUUGGUCGCUCGUUUAAGCGAUUGUGUUGUAAGUUCCAUGGCCCUUCAACUACAAUUAUAUCACCAAUACUCUCAUCUGAUUCUUCACUCAACAGAUUCGAUAU	....(((((.(((((((((((((((((((..((....(((..((((((((((...((((((.((((.(((((........))).)).)))).)))...(((((.(........))))))((((((...((((...)))).))))))...)))...)))))))))))))....(((((((((((..(((.....)))..)))).)))))))((((((((((.(((..........))))))).)))))).......))..))))))))))...)))))).))).))...)))....	-82.1	[8, 29, 258, 283]	275	5 success	Coordinates	published		valid	1-fail					Y	TE	N	Not tested: not intergenic	4
PID0061	Zhou2012-iu	Scscl	SS-milR-C20	i	Supercontig_2.7:26611-26905:-	sclerotinia_sclerotiorum_2_supercontigs	CH476622.1:1900520-1900795:+	GCA_000146945.2_ASM14694v2	gene, TE	UGAUGGGGAAGAUGAGAGUU	FALSE	UUAACGAUGAUGAUGGGGAAGAUGAGAGUUCUGACUCCGGUAAUGAUGGUAUAGGAACAUCUCCAGUAGAUUGUCUUGUAAGUGCUUCUGGUGAUAAGGUUGCUCUAGGCGUUGGCAAUUGAGGGUUAGUUUGAGGAACCCCCUCAUUGGUUGGAAUACCAUCAUCCGUCUUGUUUGAAGAGCUUUCAUUCGUUGGUCGCUCGUUUAAGCGAUUGUGUUGUAAGUUCCAUGGCCCUUCAACUACAAUUAUAUCACCAAUACUCUCAUCUGAUUCUUCACUCAACAGAUUCGAUAU	....(((((.(((((((((((((((((((..((....(((..((((((((((...((((((.((((.(((((........))).)).)))).)))...(((((.(........))))))((((((...((((...)))).))))))...)))...)))))))))))))....(((((((((((..(((.....)))..)))).)))))))((((((((((.(((..........))))))).)))))).......))..))))))))))...)))))).))).))...)))....	-82.1	[8, 29, 258, 283]	275	5 success	Coordinates	published		valid	1-fail					Y	TE	N	Not tested: not intergenic	4
PID0062	Zhou2012-iu	Scscl	SS-milR-C20	j	Supercontig_2.7:592804-593098:-	sclerotinia_sclerotiorum_2_supercontigs	CH476622.1:1900520-1900795:+	GCA_000146945.2_ASM14694v2	gene, TE	UGAUGGGGAAGAUGAGAGUU	FALSE	UUAACGAUGAUGAUGGGGAAGAUGAGAGUUCUGACUCCGGUAAUGAUGGUAUAGGAACAUCUCCAGUAGAUUGUCUUGUAAGUGCUUCUGGUGAUAAGGUUGCUCUAGGCGUUGGCAAUUGAGGGUUAGUUUGAGGAACCCCCUCAUUGGUUGGAAUACCAUCAUCCGUCUUGUUUGAAGAGCUUUCAUUCGUUGGUCGCUCGUUUAAGCGAUUGUGUUGUAAGUUCCAUGGCCCUUCAACUACAAUUAUAUCACCAAUACUCUCAUCUGAUUCUUCACUCAACAGAUUCGAUAU	....(((((.(((((((((((((((((((..((....(((..((((((((((...((((((.((((.(((((........))).)).)))).)))...(((((.(........))))))((((((...((((...)))).))))))...)))...)))))))))))))....(((((((((((..(((.....)))..)))).)))))))((((((((((.(((..........))))))).)))))).......))..))))))))))...)))))).))).))...)))....	-82.1	[8, 29, 258, 283]	275	5 success	Coordinates	published		valid	1-fail					Y	TE	N	Not tested: not intergenic	4
PID0063	Zhou2012-iu	Scscl	SS-milR-C20	k	Supercontig_2.8:237952-238246:-	sclerotinia_sclerotiorum_2_supercontigs	CH476622.1:1900520-1900795:+	GCA_000146945.2_ASM14694v2	gene, TE	UGAUGGGGAAGAUGAGAGUU	FALSE	UUAACGAUGAUGAUGGGGAAGAUGAGAGUUCUGACUCCGGUAAUGAUGGUAUAGGAACAUCUCCAGUAGAUUGUCUUGUAAGUGCUUCUGGUGAUAAGGUUGCUCUAGGCGUUGGCAAUUGAGGGUUAGUUUGAGGAACCCCCUCAUUGGUUGGAAUACCAUCAUCCGUCUUGUUUGAAGAGCUUUCAUUCGUUGGUCGCUCGUUUAAGCGAUUGUGUUGUAAGUUCCAUGGCCCUUCAACUACAAUUAUAUCACCAAUACUCUCAUCUGAUUCUUCACUCAACAGAUUCGAUAU	....(((((.(((((((((((((((((((..((....(((..((((((((((...((((((.((((.(((((........))).)).)))).)))...(((((.(........))))))((((((...((((...)))).))))))...)))...)))))))))))))....(((((((((((..(((.....)))..)))).)))))))((((((((((.(((..........))))))).)))))).......))..))))))))))...)))))).))).))...)))....	-82.1	[8, 29, 258, 283]	275	5 success	Coordinates	published		valid	1-fail					Y	TE	N	Not tested: not intergenic	4
PID0064	Zhou2012-iu	Scscl	SS-milR-C20	l	Supercontig_2.17:416632-416926:+	sclerotinia_sclerotiorum_2_supercontigs	CH476637.1:416640-416915:+	GCA_000146945.2_ASM14694v2	gene, TE	UGAUGGGGAAGAUGAGAGUU	FALSE	UUAACGAUGAUGAUGGGGAAGAUGAGAGUUCUGACUCCGGUAAUGAUGGUAUAGGAACAUCUCUAGUAGAUUGUUUUGUAAGUGCUUCUGGUGAUAAGGUUGCUCUAGGCGUUGGCAAUUGAGGGUUAGUUUGAGGAACCCCCUUAUUGGUUGGAAUACCAUCAUCUGUCUGGUUUGAAGAGCUUUCAUUUGUUGGUUGCUCGUUUAAGCGAUUGCGUUGUAAGUUCUAUGGCCCUUCAACUACAAUUAUAUCACUAAUACUCUCAUCUGAUUCUUCACUCAACAGAUUCGAUAU	....(((((.(((((((((((((((((((........(((((((((((((((...((((((.((((.(((((........))).)).)))).)))...(((((.(........))))))((((((...((((...)))).))))))...)))...)))))))))).)).)))(((((((((((..(((.....)))..)))).)))))))(((...((((((.(((............)))))))))...)))......))))))))))...)))))).))).))...)))....	-72.6	[8, 29, 258, 283]	275	5 success	Coordinates	published		valid	1-fail					Y	TE	N	Not tested: not intergenic	4
PID0065	Zhou2012-iu	Scscl	SS-milR-C21		-	sclerotinia_sclerotiorum_2_supercontigs	-	-	-	UGUGGAUAAGAACGUGGCAAUU	-	-	-	-	-	-	5 success	Coordinates	published		secondary structure in duplex	-	-	-	-	-	-	not evaluated: hairpin invalid	-	-	-
PID0066	Zhou2012-iu	Scscl	SS-milR-C22		-	sclerotinia_sclerotiorum_2_supercontigs	-	-	-	UAACUGUGACGGAAAUCCCU	-	-	-	-	-	-	5 success	Coordinates	published		secondary structure in duplex	-	-	-	-	-	-	not evaluated: hairpin invalid	-	-	-
PID0067	Zhou2012-iu	Scscl	SS-milR-C23		Supercontig_2.8:452430-452530:-	sclerotinia_sclerotiorum_2_supercontigs	CH476628.1:452437-452522:-	GCA_000146945.2_ASM14694v2	gene, TE	UAUGAACGUUUCAGAUUGCUAA	FALSE	UUGAUCAUUAUAUGAACGUUUCAGAUUGCUAAAACAGCCAAUAUCAAGUGGUUGAGUUAAAUGACUUGAAUGUGGUGGUAAUUUGAGGUAUAUAAUAUCAU	.((((.((((((((....((((((((((((......((((...((((((.(((......))).))))))...)))))))))))))))))))))))))))).	-30.4	[8, 31, 74, 93]	85	5 success	Coordinates	published		valid	1-fail					Y	TE	N	Not tested: not intergenic	4
PID0068	Zhou2012-iu	Scscl	SS-milR-C24	a	-	sclerotinia_sclerotiorum_2_supercontigs	-	-	-	UAUAAAAAGGGUGUAUUUCGAA	-	-	-	-	-	-	5 success	Coordinates	published		secondary structure in duplex	-	-	-	-	-	-	not evaluated: hairpin invalid	-	-	-
PID0069	Zhou2012-iu	Scscl	SS-milR-C24	b	-	sclerotinia_sclerotiorum_2_supercontigs	-	-	-	UAUAAAAAGGGUGUAUUUCGAA	-	-	-	-	-	-	5 success	Coordinates	published		secondary structure in duplex	-	-	-	-	-	-	not evaluated: hairpin invalid	-	-	-
PID0070	Zhou2012-iu	Scscl	SS-milR-C25		Supercontig_2.9:1127633-1127733:+	sclerotinia_sclerotiorum_2_supercontigs	CH476629.1:1127641-1127725:+	GCA_000146945.2_ASM14694v2	gene, TE	UGUGGAUCUGGAUUUUGGGUAU	FALSE	UUGGUUUGGAUGUGGAUCUGGAUUUUGGGUAUUGGGCUAUACUUUUUGCUUUGCUUUGCUUUGCUUUGAUUGCUUGCAAUUGGGAUCGGGAUUCUUAUAUA	...((..((((.(.(((((.((((.((((((..((((..........((........))...))))....)))))).)))).))))).).))))..))...	-21.6	[8, 31, 69, 92]	84	5 success	Coordinates	published		valid	2-pass					Y	near-PCG	N	Not tested: not intergenic	3
PID0071	Zhou2012-iu	Scscl	SS-milR-C26		Supercontig_2.13:259470-259573:-	sclerotinia_sclerotiorum_2_supercontigs	CH476633.1:259480-259565:-	GCA_000146945.2_ASM14694v2	gene, TE	UUUGACGCUAGAGGAACUUCU	FALSE	AUGAUCCUCGAUUGCCUCUUGGACGUCAAGGCUGAAGCGAUUGCCACUAGAAGGAGCUGUGAUUGCUACUCUCUUUGACGCUAGAGGAACUUCUUCAGUGAUCA	.(((((((.((...(((((.((.((((((((..(((((((((((..((......))..)))))))))..)).)))))))))))))))....))...)).)))))	-34.2	[8, 31, 71, 93]	85	5 success	Coordinates	published		valid	2-pass					Y	PCG-CDS-exon	N	Not tested: not intergenic	4
PID0072	Zhou2012-iu	Scscl	SS-milR-C27		Supercontig_2.25:64813-64920:+	sclerotinia_sclerotiorum_2_supercontigs	CH476645.1:64824-64910:+	GCA_000146945.2_ASM14694v2	gene, TE	UAGAUUUUUCAAGAAGGAUU	FALSE	UCAACAACCACAACUCUCCUUGAAAAAUCUAUUGAUAUCUUGAAUAUCUUUCAAUUGAUAUUAUCUUCAAGAUAUCAAUAGAUUUUUCAAGAAGGAUUGUGGUUGUUG	.((((((((((((.(((.((((((((((((((((((((((((((((((........))))).....))))))))))))))))))))))))).))).))))))))))))	-57	[11, 32, 76, 97]	86	5 success	Coordinates	published		valid	1-fail					Y	none	Y	N	4
PID0073	Zhou2012-iu	Scscl	SS-milR-C28		Supercontig_2.20:24123-24476:-	sclerotinia_sclerotiorum_2_supercontigs	CH476640.1:24133-24464:-	GCA_000146945.2_ASM14694v2	gene, TE	UUUGGAUGUAGUGUGAGGAGUU	FALSE	UCCUCUUCUCCGCACUCCCACUUCGCUCCGGACUACUAGCACUCCGCUUCUUUCCAUCCUCCCUAACUCGCUCAUCCUUAAAUGGAUCCGCGUGUUUCUUUGCUGCUGGGAUGGUAUCAGUGGUUUCUUUGAAGCUGACCUUUGCCUUGGAGGAUCGGGAUGAGCUGGAUUUUUGCAUCUUGAGAGUUUGGGUUGCGUUUAGGGUUGCUGCGUAUGUGUAUAUGUAAUGCUUGGAGGUUUGUUGGUAUAGAUAUAGAUAUGAAUUUAAGUUUUUAGAUACUGUGAAUAGAUGCUUAGUAAUUGGUAAUUGGUAAUGUGGUGAUUUGGAUGUAGUGUGAGGAGUUAUUGUAGAGG	.(((((.......((((((((...((((((((.((((((((.(((((((..(((((((((((..(((.(((..((((......))))..))).)))((((.......)))).((((...((((((((...)))))).))...))))..))))))).)))).)))).)))....)))..((((((.((.......)).))))))(((((((.((((.(((.((((((...((.((((.((.(((.((((........)))).)))..)).)))).)).))).))).))).)))).)))))))...............))))).)))))).))...))).)))))......)))))	-91.3	[12, 33, 320, 343]	331	5 success	Coordinates	published		valid	2-pass					Y	PCG-CDS-exon	N	Not tested: not intergenic	4
PID0074	Zhou2012-iu	Scscl	SS-milR-C29	a	Supercontig_2.18:761211-761304:+	sclerotinia_sclerotiorum_2_supercontigs	CH476638.1:761241-761294:+	GCA_000146945.2_ASM14694v2	gene, TE	UAGAUCAAGUAGAAUAUAGGUA	FALSE	CUAAUUGGUAAUUGUAGGUUAAGGCUUUAUCACUAGUAUUCACUUGAAAGUGAAUUCGUUACUAGAUCAAGUAGAAUAUAGGUAAACUAAUUGA	.((((((((......((((....))))....(((.((((((((((((.(((((.....)))))...)))))).)))))).)))..)))))))).	-18.7	[30, 50, 60, 83]	53	5 success	Coordinates	published		valid	1-fail					Y	none	Y	N	4
PID0075	Zhou2012-iu	Scscl	SS-milR-C29	b	Supercontig_2.12:517775-517868:+	sclerotinia_sclerotiorum_2_supercontigs	CH476623.1:2104082-2104135:+	GCA_000146945.2_ASM14694v2	gene, TE	UAGAUCAAGUAGAAUAUAGGUA	FALSE	CUGGUUGGUAGUUAUGGGUUAAGGCUUUAUCACUGGUAUUCACUUGGAAGUGAAGUCGUUACUAGAUCAAGUAGAAUAUAGGUAAACUAAUUGA	..(((((((......((((....))))....(((.((((((((((((.(((((.....)))))...)))))).)))))).)))..)))))))..	-16.4	[30, 50, 60, 83]	53	5 success	Coordinates	published		valid	1-fail					Y	none	Y	N	4
PID0076	Zhou2012-iu	Scscl	SS-milR-C29	c	-	sclerotinia_sclerotiorum_2_supercontigs	-	-	-	UAGAUCAAGUAGAAUAUAGGUA	-	-	-	-	-	-	5 success	Coordinates	published		secondary structure in duplex	-	-	-	-	-	-	not evaluated: hairpin invalid	-	-	-
PID0077	Zhou2012-iu	Scscl	SS-milR-C29	d	Supercontig_2.25:199956-200107:-	sclerotinia_sclerotiorum_2_supercontigs	CH476623.1:2104082-2104135:+	GCA_000146945.2_ASM14694v2	gene, TE	UAGAUCAAGUAGAAUAUAGGUA	FALSE	ACUUUUGGACCACCUGUAACGAUACUGUACUGGAGGCAGCGGCUGCUUGAGGUUCUUCUGGUUGGUAGUUGUGGGUUAAGGCUUUUAUCACUGGUAUUCACUUGGAAGUGAAGUCGUUACUAGAUCAAGUAGAAUAUAGGUAAACUAAUUGA	......((.(((((((((((..(((((.((((((((.(((..(.....)..)))))))))))))))))))))))))...))))......(((.((((((((((((.(((((.....)))))...)))))).)))))).)))...........	-34.9	[88, 108, 118, 141]	53	5 success	Coordinates	published		valid	1-fail					Y	none	Y	N	4
PID0078	Zhou2012-iu	Scscl	SS-milR-C29	e	-	sclerotinia_sclerotiorum_2_supercontigs	-	-	-	UAGAUCAAGUAGAAUAUAGGUA	-	-	-	-	-	-	5 success	Coordinates	published		secondary structure in duplex	-	-	-	-	-	-	not evaluated: hairpin invalid	-	-	-
PID0079	Zhou2012-iu	Scscl	SS-milR-C30		Supercontig_2.1:273234-273518:+	sclerotinia_sclerotiorum_2_supercontigs	CH476621.1:273410-273508:+	GCA_000146945.2_ASM14694v2	gene, TE	UGAAAGAUUCUCUGUUGGACGG	FALSE	CCGGAGGACUUCUCACAUCGUCACGCUCACGAAUCUCAUAUCCUUCAUUUGGACGUGCUUUUUCGAUAUUGAGUUUAGCUAGCAUGGGUUUAGGUCCAUUACGAACAGAAGCUCCACGACUCAUAGGUGGAGGUCCAGAUGAUUUCUCUGACUCAGGAGGUGGCGUGGGUGGGAAUACGUUUCGAUUUAGAGGAGGUUCUGAUUGUUGCCUCUUACUAGCCAGACCUGGCUUUACGAGAUUCGCCGCAGCGUAUGAAAGAUUCUCUGUUGGACGGUCGUCCUUCG	.(((((((((((((((..((((((.(((..((...(((......((((((((((..(((((((((..((.((.((.((((......)))).)).)).))..))))..)))))(((((.........))))).))))))))))......))).))..)))))))))...)))))))..((((.((((..((((((..(((....(((((((((.((..(((((....))))).)).))).......))))))...)))...))))))))))))))...))))))))	-89.9	[176, 201, 251, 274]	98	5 success	Coordinates	published		valid	1-fail					Y	PCG-CDS-exon	N	Not tested: not intergenic	4
PID0080	Zhou2012-iu	Scscl	SS-milR-C31		Supercontig_2.18:887352-887437:-	sclerotinia_sclerotiorum_2_supercontigs	CH476638.1:887362-887426:-	GCA_000146945.2_ASM14694v2	gene, TE	UGGGACUAAUGCAUAUUUCUUC	FALSE	AACGGCUGCAAGAGGAUAGUAAUAUUGUUCCGACCAGUAAUUACUUCGAGCUUCUGGGACUAAUGCAUAUUUCUUCUUGAGCUCUG	...((((.((((((((.((((.((((((((((...(((...........)))..)))))).))))..))))))))))))))))...	-21.1	[11, 33, 52, 75]	64	5 success	Coordinates	published		valid	2-pass					Y	PCG-CDS-exon	N	Not tested: not intergenic	4
PID0081	Zhou2012-iu	Scscl	SS-milR-C32		Supercontig_2.4:1307933-1308147:-	sclerotinia_sclerotiorum_2_supercontigs	CH476624.1:1307943-1308139:-	GCA_000146945.2_ASM14694v2	gene, TE	GAAGCCGCACCA	TRUE	CUCUGUAUUCUGAGAACUUUAGAUCGGCUGACAGACUCUGAAAUCGCUGAGCUGAAGCCGCACCACCAUAAAUUCUUCGAAUGGAUGCAAUACGAACGGAACAAGCUCAAUAAUUCAAAGAUGCGUAACAGCGCAGUGAAUGUCAAGGAAUACCUUAACGACGAUAUGUUUUAUGAAAAGCUGUUGAGCCGCCUAGAGCAUAGUAAUGCGAGAGG	((((((((((((.(..((((((..((((((((((..((((((((...((((((....(((......(((..((((...))))..))).........)))....))))))...(((((....(((((....))))).)))))(((((((....))))...))).....)))))).))....))))).))))).))))))).))).))))).)))).	-53.8	[8, 32, 181, 204]	196	5 success	Coordinates	published		valid	2-pass					Y	PCG-CDS-exon	N	Not tested: not intergenic	4
PID0082	Zhou2012-iu	Scscl	SS-milR-C33		Supercontig_2.19:326616-326831:-	sclerotinia_sclerotiorum_2_supercontigs	CH476639.1:326620-326823:-	GCA_000146945.2_ASM14694v2	gene, TE	UGAUAGGAAAUGUAUGAAGCGG	FALSE	CCGUGAAUAUUGAUAGGAAAUGUAUGAAGCGGCAGUCGAGCUAGUACGUGUACCAAAACCUGGAUGCAUCAAACCCUCCGUAUUGAAUUUCUUGUAAACUAGAUAAUUCCCAAGCAAUAAAAUAUUGUGUGUGUGUGAACGAAUGUAUUGGCCUUAGCUUUCUUGCCAUCGAAAUCGGUUGUAGUUCAUUAAUCGCACGUGCUCCUAUCGACACCA	..(((....(((((((((...(((((..((((.....((((((..((((((((((.....))).)))))...............((((((((........))).))))).((.((((((...)))))).))........(((......((((............))))......)))))..)))))).....)))).)))))))))))))))))..	-45	[8, 31, 192, 211]	203	5 success	Coordinates	published		valid	2-pass					Y	PCG-intron	N	Not tested: not intergenic	3
PID0083	Zhou2012-iu	Scscl	SS-milR-C34		Supercontig_2.5:1290523-1290821:+	sclerotinia_sclerotiorum_2_supercontigs	CH476625.1:1290531-1290813:+	GCA_000146945.2_ASM14694v2	gene, TE	UGUGGGAGAAUAGAUGAGCGUG	FALSE	GGACUCCAAAUGUGGGAGAAUAGAUGAGCGUGUGCCAGGGACCCUCUUGAUACGUUUAUGAGUUAUAUUUGAGAACAAGUCCGGAGCACAUGAGCUAUCAGCUGUCCACAUUAUCGGAGCUUCCUGAACUUUGACUAUGCGUGUCGCGAUGGAUGCAUUCAACCAAUUUAUUUCGGGCUUACUCUUGUUUGAAACUUUGUAGAGUUGGGUAUGUUCAAUGCACGGAAGAGGAGAAGAACGAGCAGCAGCGGUUCUUCGAAUAUAUUCAUGCUUAAUGCUCUCGAACAUAUCUGGGGUAG	..((((((.(((((.((((.((..((((((((..........(((((((((((((.....(((((...((.((...((((((((........((((...))))..........))))).))).)).))...)))))..)))))))(((.((((((.((((((((.((...((((((((........))))))))....)).).))))))).)))))).)))....)))))).(((((((..((....)).))))))).........)))))))).)).))))...))))).))))))..	-81.3	[8, 31, 266, 290]	282	5 success	Coordinates	published		valid	2-pass					Y	PCG-CDS-exon	N	Not tested: not intergenic	4
PID0084	Zhou2012-iu	Scscl	SS-milR-C35		Supercontig_2.10:411871-412083:-	sclerotinia_sclerotiorum_2_supercontigs	CH476630.1:411976-412075:-	GCA_000146945.2_ASM14694v2	gene, TE	UGUGGUUUUGAAUUACUCGGCG	FALSE	UGUGUGGCUUUGUGGUUUUGAAUUACUCGGCGGGAUCGUCCUAGAAAUGGUUGUGAAUGAUGAUAACAUCUAUGAUAAAUGAUCGAUAGCCUCAAGCACCUUCAGUGGGCCAUGAUGUCGUUGUUGGGGGCAGUCAAGGUUAGAGCUUUGUGAGGCUCAGUAUAUGGGUAAGGAUAACGAGUGCUUCAUAAUCACCCAGAGACGGCCAUCAUG	...(((((((((.((((((((.......(((..(((((((.((((....(((((........))))).)))).)))....))))....)))))))).)))..)))..))))))(((((((((.(((((((((.((...((((...(((......(((((.....))))))))..)))))).)))).........))))).))))).))))...	-53.6	[8, 31, 87, 107]	99	5 success	Coordinates	published		valid	1-fail					Y	PCG-CDS-exon	N	Not tested: not intergenic	4
PID0085	Zhou2012-iu	Scscl	SS-milR-C36		Supercontig_2.1:343039-343327:-	sclerotinia_sclerotiorum_2_supercontigs	CH476621.1:343049-343315:-	GCA_000146945.2_ASM14694v2	gene, TE	UAACGGCAUAAUAUUAUCUUU	FALSE	AAGGGGGGAAGGAGGGAGAAUUGUGCGUUAUUAAUGGAAUGGAAAAGAAUGGAAUGGAUACUGUACCUAGUAUUUCUCAUUGCUUAUAUGUAAACUUAUGAGGAUUUGACACUGAGGGAAUAAUGGAAUAUCAGGAAUGGAAUCCAAAGAACAGAAGACGAUAAACAAAAAACACAAGGUAAAACACAGAAAUAAUCACCAAAGUCCUCGCAUCUCGUAAAAAAUCUGGCAUUGUAUUGUAACUCUGGUAAUGUAAUGUAACGGCAUAAUAUUAUCUUUCAUCCACCAU	....(((((..((((((..(((((((((((((((((.((((....(((......(((((.((((.(((.((((((((((.(.((((((........)))))).)..)))...............))))))).))).)))).))))).(((...((.(((............................................))).))...))).........)))..)))).)))))..................))))).)))))))....)))))).))).))..	-48.79	[12, 31, 256, 278]	266	5 success	Coordinates	published		valid	1-fail					Y	TE	N	Not tested: not intergenic	4
PID0086	Zhou2012-iu	Scscl	SS-milR-C37		Supercontig_2.9:817227-817530:+	sclerotinia_sclerotiorum_2_supercontigs	CH476629.1:817240-817520:+	GCA_000146945.2_ASM14694v2	gene, TE	UGUAUCACUGGAGGAACCGGA	FALSE	AGUCGUCUAGAUAUGUGUUAGCUCCAUGAUACAAUAAUUUUGUCGGGUUUACAUACCAUUGCCAAGACCAUCAAUUACCAAAAUGGAAUGGCAUUUUGUCGUAGGUCCAUCCAUCAAAUUGCCUACCUCAUCUCUAGCCGGACUGAAUAGUACAUUUCCAAAUGUAAGCCAUUUACUAACACUCAUACUCCCCACCCUCAAAUUAACCUGCGAAACUGGAGAAUUACUUUCUUCGGAUUCGAUUCUCAAGAGACUAGCUCCUGAAAUCCGAGAUGUAUCACUGGAGGAACCGGAUUUUCGUGAU	....(((..((.((.((....((((((((((((.......(.(((((((..........(((((...((((...........))))..))))).......((((((..............)))))).((((((......))).)))....((((((....))))))............................................((((.((((((((.....)))))))).))))....(((.(((.....))).)))))))))).)))))))).)))))....)).))..))..)))	-62.5	[13, 41, 271, 293]	280	5 success	Coordinates	published		valid	1-fail					Y	PCG-CDS-exon	N	Not tested: not intergenic	4
PID0087	Zhou2012-iu	Scscl	SS-milR-C38		Supercontig_2.30:80953-81190:-	sclerotinia_sclerotiorum_2_supercontigs	CH476650.1:80962-81182:-	GCA_000146945.2_ASM14694v2	gene, TE	UAGACGGCAAAACUCGUAACA	FALSE	CACGUGAUCCUAGACGGCAAAACUCGUAACACUUUUCUUUUCAUUCGAUAUUUGAGCGCAGAUUAGAAAAGAAGUCUUUAUUCCUUCUUAUUUCUUUUUAUAUUCUGAUAUUUUGAUUCGAACCUACAGUUGUUGUAUUUUUUAAUCGUGGGUUAGAUUUAUAUUUAUAUUAUACAAGGAGGGUUAUUAUUGUGGUGAUAGUUCUUAUGUUACGAGGUUUGCCGUCUAGAUCACGUGG	(((((((((.((((((((((..(((((((((.............((((.....((...((((.((((((((((((..............)))))))))).)).))))...)).....))))((((((.((((..........)))).))))))(((((....)))))...........((((((((((((....)))))))))))).)))))))))..))))))))))))))))))).	-74.3	[8, 30, 207, 228]	220	5 success	Coordinates	published		valid	1-fail					Y	none	Y	N	4
PID0088	Zhou2012-iu	Scscl	SS-milR-C39		Supercontig_2.22:369690-369997:+	sclerotinia_sclerotiorum_2_supercontigs	CH476642.1:369698-369772:+	GCA_000146945.2_ASM14694v2	gene, TE	UAGACUUAUAGAGCUUGCGGCA	FALSE	GAGUAUCCCCUAGACUUAUAGAGCUUGCGGCAGAUUCCUCACGAUCUAAUUGUAGGGUGCUUUCGUUUGGCUCGGAAUCUGGGUCCUUAUUGAUCCAAAUCUUUUCUAGCCUAUGUAUUGUUAGUAUGGAAGGUAGUUCUACUGUGAGGUUACUUACGGUACAGUGAGACUUGGAUUGAUGUAUCUUGUGCCUCUUUCCCUGACUUCGUCGACAGUAGUGCCUCUUUGAAUAUGUCCUGGAGGUCUAUUGAUGCCGAUGUCUUCGCCAGCGAUGUUGAUGUCUGGAUUACUAUCUCUUCUGAUACUUC	(((((((.((((((......(((((.((((.((..((((.(((((...)))))))))..)).))))..)))))....))))))..(((((((.........(((((((..(((........)))..)))))))......(((((((((....))))))))))))))))....(((..((.((((...)))).))..)))..(((.(((.((.((((((.((((((..((.....))..)))))))))))).)).))).)))....((((..((....))..))))...............))))))).	-86.7	[8, 31, 60, 82]	74	5 success	Coordinates	published		valid	1-fail					Y	PCG-CDS-exon	N	Not tested: not intergenic	4
PID0089	Zhou2012-iu	Scscl	SS-milR-C40		Supercontig_2.12:1103085-1103407:+	sclerotinia_sclerotiorum_2_supercontigs	CH476632.1:1103093-1103399:+	GCA_000146945.2_ASM14694v2	gene, TE	UGAUUGAUCAAAAGACAGCU	FALSE	AUGAAUUUCUUGAUUGAUCAAAAGACAGCUGAGUCGAAAGAAAAUGUACGCAAUAAGGUUGACUCCUAGUCGAGUUGAGGGCGUGGUGAGUGUGAGGGUGAGUGUGAGUCGAGGGCGUUGAAUGAGUAUAGUAUACCUAAUAGCUUAGUUUUGUUAGGUAAUUAAUUUGUAAAAUAAUAAAUUCGAAAAAUAACUUUGAUUAUUCAGGUUCAGGUGUCAAGUUGAGAUUCUCUUUUCUCUCUUCUCUUUUCUGCCCUCUGCUCUCUCUCUCUCUCUCUCUGCUCUCUGUUUCGCUUUCUGCUUGGUUCGUUCAAAAGGUAAAA	....((((.((((.(((....(((.(((..(((.(((((.(..............((.((((((...)))))).))(((((((....(((.(.(((((.(((...((((.(((((((..(((.(((.......((((((((((.......))))))))))...(((((((......))))))).((.....(((((.((....)))))))......))(((..((((........)))).))))))..)))))))))).)))).))).))))).).))))))))))).)))))))).))))))...))).)))).))))....	-82.2	[8, 29, 295, 314]	306	5 success	Coordinates	published		valid	2-pass					Y	PCG-intron	N	Not tested: not intergenic	3
PID0090	Zhou2012-iu	Scscl	SS-milR-C41		Supercontig_2.3:2181426-2181685:-	sclerotinia_sclerotiorum_2_supercontigs	CH476623.1:2181437-2181677:-	GCA_000146945.2_ASM14694v2	gene, TE	GACGAUCAGAAC	TRUE	AUAAGUGGCAUGGACAAAGACAGUAACUUCGUGUUUGUUGGAGCUUACUGCAAUGAGGCGCGAUUUUUGAUGAAUAGCAAGACCCCAAGCACUCUCUCCGACGUUCUCAUGAAAAAAACUGAGACGAUCAGAACCAAAUCAUGUAGGUAAAGUUAGUUACUCACGGUCGUGUAUUGCCAAUAGGAAUUGAUGAUGCUGUACUUUGCUCCGCCUGUUGAAGUUCCUCUGCUAGAAGGUCCGUGUAGUAUGCCGUCACAUCU	....((((((((.(((..(((.....((((..((.....(((((((...(((((...((((((((..((((((.((((...(((............((.(((((.((((..........))))))).)).)).............)))...)))).))).))).)))))))))))))(((((((......((..((........))..))))))))))))))))...))..)))))))..)))..))))))).)......	-58.3	[8, 32, 228, 248]	240	5 success	Coordinates	published		valid	2-pass					Y	PCG-CDS-exon	N	Not tested: not intergenic	4
PID0091	Zhou2012-iu	Scscl	SS-milR-C42		Supercontig_2.10:439003-439207:-	sclerotinia_sclerotiorum_2_supercontigs	CH476630.1:439014-439199:-	GCA_000146945.2_ASM14694v2	gene, TE	UGGGAUUGCUUAGAAGCCAGGGG	FALSE	GCUAUAUCGAUGGGAUUGCUUAGAAGCCAGGGGAUGAUUUUGGAAGGGGGGGCUCUUUGUAAGCGCUUUGAAAGCUUUCCCUUUUUUACAAAAGAAAAAGUGUAGUAAAGCUUUCCUUUUACUAUAUAAGCAAUGGGUAUAGGCUGUAAUAUAAUUGAAGUGUUGUUGACCUCCUGGGAUCUUGGCAGCAUAUGCAUAUAUAGUA	(((((((..(((.(.(((((.(((..(((((((....(((((((((((((((((.((((.........))))))))))))))))....)))))......(((((((((((......))))))))))).(((((((..((((........)))).......)))))))...)))))))..))).)))))).)))....))))))).	-52.3	[8, 32, 170, 193]	185	5 success	Coordinates	published		valid	1-fail					Y	none	Y	N	4
PID0092	Zhou2012-xq	Meani	man-milR-1		GL698711.1:1558114-1558218:+	ADNJ00000000.1_scaffolds	KE384782.1:23757-23841:-	GCA_000426965.1_ASM42696v1	gene, TE	UAUCUUGUGGACUAAUAGGUA	FALSE	UUGGCAGACAUAUAUAGUUUAGGUCUAUAGGAUAAUAAUAUCUUACCCGUUCAAGUCGGGUUUACCUUAAACUUUAUCUUGUGGACUAAUAGGUAAGUCAUAAAU	......(((.(((.((.....((((((((((((((.........(((((.......)))))............))))))))))))))..)).))).)))......	-24.8	[10, 35, 72, 94]	84	5 success	Coordinates	published		valid	0-no_evidence	RF00005	5.39e-11	tRNA	tRNA	Y	none	Y	N	4
PID0093	Zhou2012-xq	Meani	man-milR-2		GL698711.1:3677163-3677266:+	ADNJ00000000.1_scaffolds	KE384827.1:8302-8330:+	GCA_000426965.1_ASM42696v1	gene, TE	UACAAGGGCACGAGCAAGGU	FALSE	CCGGCACUCGACCUUGUUCGUGCCCUUGUACCAUCACAAUAUUAUGGAUGGGUCCCGGCCGGUGGCUGUGACGGUACAAGGGCACGAGCAAGGUCAAGUGCGAC	...(((((.(((((((((((((((((((((((.(((((......(((.(((...))).))).....))))).))))))))))))))))))))))).)))))...	-66	[10, 31, 72, 93]	83	5 success	Coordinates	published		valid	0-no_evidence					Y	none	Y	N	3
PID0094	Zhou2012-xq	Meani	man-milR-3	a	GL698711.1:5448939-5449023:+	ADNJ00000000.1_scaffolds	KE385033.1:27-88:-	GCA_000426965.1_ASM42696v1	gene, TE	UUGUCGAGGCAUACCACUAUU	FALSE	ACCGUCUGCGACGAGUCGAAGGGUUUGCCUCGUAGGCAUGCGGCAGCCGCGAUGUUGUCGAGGCAUACCACUAUUCGUUGCGUGG	.(((..((((((((((...(((((.(((((((..(((((((((...)))).)))))..))))))).))).)))))))))))))))	-43.4	[13, 37, 52, 74]	61	5 success	Coordinates	published		valid	0-no_evidence					Y	none	Y	N	3
PID0095	Zhou2012-xq	Meani	man-milR-3	b	GL698713.1:2575766-2575847:+	ADNJ00000000.1_scaffolds	KE384784.1:30618-30679:+	GCA_000426965.1_ASM42696v1	gene, TE	UUGUCGAGGCAUACCACUAUU	FALSE	CUCUGCGACGAGUCUGAUGGCUUGCCUCGAAGGCAUUUGGCAGCUGCGAUGUUGUCGAGGCAUACCACUAUUCGUUGUGUGC	....(((((((((..(.(((..((((((((.((((((..((....)))))))).))))))))..)))).)))))))))....	-35	[10, 34, 49, 71]	61	5 success	Coordinates	published		valid	0-no_evidence					Y	TE	N	Not tested: not intergenic	4
PID0096	Zhou2012-xq	Meani	man-milR-4		GL698711.1:1657779-1657882:-	ADNJ00000000.1_scaffolds	KE384737.1:6977-7058:+	GCA_000426965.1_ASM42696v1	gene, TE	UCGAGGAGCAGAAGCUGAUCUU	FALSE	GUUGGGCGAAGGAGGGCCGUUACGGCGCCUUGUGGGAAGUUAUGAUCGGAAUGGAAUAUUUGUUUACCUUCUUCGAGGAGCAGAAGCUGAUCUUCUCGCCGCUU	....(((((.(((((...(((.(.((.(((((.((((((...(((.((((........)))).))).))))))))))).)).).)))...))))))))))....	-31.3	[11, 35, 70, 93]	82	5 success	Coordinates	published		valid	0-no_evidence					Y	TE	N	Not tested: not intergenic	4
PID0097	Zhou2012-xq	Meani	man-milR-5		GL698711.1:4915822-4915978:-	ADNJ00000000.1_scaffolds	KE384721.1:2337551-2337685:-	GCA_000426965.1_ASM42696v1	gene, TE	UUAACAAGGCGUCGAGGGAUA	FALSE	GAAGUUAAAAAACUUAACAAGGCGUCGAGGGAUACAGGGAAGAAAAACUAAGUUAUUAUUUUUUUCUUCGCUAGGUCCUCAGUGCUUUUCUUAACCUUCCCUCCUCUAUCUUUCUUUUUACCUGCAUCCCUCGCCGCCUUGUUAAGUCUUAUAACUU	.((((((.((.(((((((((((((.((((((((.(((((((((((((.(((....)))..)))))))))(..((((.................))))..)....................)))).)))))))).))))))))))))).)).))))))	-53.9	[11, 33, 124, 146]	135	5 success	Coordinates	published		valid	0-no_evidence					Y	none	Y	N	3
PID0098	Zhou2012-xq	Meani	man-milR-6		GL698711.1:5234241-5234327:-	ADNJ00000000.1_scaffolds	KE384736.1:57429-57494:-	GCA_000426965.1_ASM42696v1	gene, TE	UUUGGAGAGGCUGCUGUGUUU	FALSE	CAAAGUCAGCAGGGAGCGGCGCCUCUUGAAUUCUGCGGACUCUUCUUUAGAUUUAGUUUGGAGAGGCUGCUGUGUUUUGCGGCCGUA	....(((.((((((.((((((((((((.((.((((.(((....))).))))......)).))))))).))))).)))))))))....	-29.2	[11, 32, 54, 76]	65	5 success	Coordinates	published		valid	0-no_evidence					Y	none	Y	N	3
PID0099	Zhou2012-xq	Meani	man-milR-7		-	ADNJ00000000.1_scaffolds	-	-	-	GCGGGUGCUGAGAAAGCGUUUA	-	-	-	-	-	-	5 success	Coordinates	published		secondary structure in duplex	-	-	-	-	-	-	not evaluated: hairpin invalid	-	-	-
PID0100	Zhou2012-xq	Meani	man-milR-8		GL698713.1:650155-650258:-	ADNJ00000000.1_scaffolds	KE384724.1:211096-211154:+	GCA_000426965.1_ASM42696v1	gene, TE	UUGCAUGAUGAGACUUAUUU	FALSE	UGCUACAUGAAGUAGCCUAGAGAAGUAAUGUCACCGAGUAAGUUAAUCAGAGUGCAAUUAUAGCCAAACCCUCCUUGCAUGAUGAGACUUAUUUUCAUCCAGUU	.(((((.....)))))...................(((((((((..(((..((((((.................))))))..))))))))))))..........	-20.4	[35, 58, 72, 93]	58	5 success	Coordinates	published		valid	0-no_evidence	RF00476	6.52e-11	Small nucleolar RNA snR61/Z1/Z11	snoRNA	Y	none	Y	N	4
PID0101	Zhou2012-xq	Meani	man-milR-9		GL698719.1:872257-872414:+	ADNJ00000000.1_scaffolds	KE384729.1:1979742-1979878:-	GCA_000426965.1_ASM42696v1	gene, TE	UGCCUAGGCAGGGUAGAUCAG	FALSE	GACACUGGUCUCUGAUCCCACCCUGCCUAGACAUGAAGAAUCUGCGAGAAAUGGCAUCUUACAAGUAUGCAAACGUUACGAGAGAUAAUUCCCUUCUGAAAAGAUACCAUUUGUCUCGGCCUAUUCAUGCCUAGGCAGGGUAGAUCAGACGCCAGUGU	.((((((((.(((((((..(((((((((((.((((((....(((.((.((((((.(((((....(((.((....)))))(((.((....)).))).....))))).)))))).)).)))....)))))).))))))))))).))))))).))))))))	-70.7	[11, 34, 125, 147]	136	5 success	Coordinates	published		valid	0-no_evidence					Y	none	Y	N	3
PID0102	Zhou2012-xq	Meani	man-milR-10		GL698730.1:210458-210658:-	ADNJ00000000.1_scaffolds	KE384762.1:24010-24188:-	GCA_000426965.1_ASM42696v1	gene, TE	AGGGAUCUAGAAAAGAAGGCUU	FALSE	UGCGUUCAUGGAAGCCUUUUUUUCCAGAUCCCUGAUUAUUUAGUUAACCUUUUUAAUUUCCUUAAAGUUAAGAUUUAUAGCAGAAAUUAGGACUUUUAGCCUUGAGGCAAGUAUUCCUUCUGUUAUAAAUCUUAAUUUUUAAAAAAAUAAGAAGAUUAACCAGAUAAUCAGGGAUCUAGAAAAGAAGGCUUCCAUAAACGC	.(((((.(((((((((((((((((.((((((((((((((((.(((((.(((((((.(((....(((((((((((((((((((((....((((...((.(((....))).))...)))))))))))))))))))))))))....))).))))))).))))).)))))))))))))))).))))))))))))))))).)))))	-98.3	[11, 34, 167, 190]	179	5 success	Coordinates	published		valid	0-no_evidence					Y	none	Y	N	3
PID0103	Zhou2012-xq	Meani	man-milR-11		GL698731.1:134906-134973:+	ADNJ00000000.1_scaffolds	KE384724.1:986925-986974:+	GCA_000426965.1_ASM42696v1	gene, TE	UGCAGGGGAGCAUCGUCGUUG	FALSE	UGCAAUAACAUGCAGGGGAGCAUCGUCGUUGGAGCGGCGGUCGAUGCCCUUGGCAAUGACGGGAGCAA	(((.....(((((.((((.((((((((((((...)))))).)))))))))).)).)))......))).	-24.7	[8, 30, 34, 57]	49	5 success	Coordinates	published		valid	0-no_evidence					Y	PCG-CDS-exon	N	Not tested: not intergenic	4
PID0104	Zhou2012-xq	Meani	man-milR-12		GL698711.1:2528604-2528700:-	ADNJ00000000.1_scaffolds	KE384730.1:1140613-1140691:-	GCA_000426965.1_ASM42696v1	gene, TE	AGACCUCGUUGAUGCUGGCAUU	FALSE	AGGAUUACCAAGACCUCGUUGAUGCUGGCAUUAAUCUCAAAGGCAAGAUUGCAAUUGCCAGAUAUGGCGGCAUCUUCCGAGGUCUCAAAGUGAAGCG	.(..((((..((((((((..(((((((.(((..((((....(((((........)))))))))))).)))))))...))))))))....))))..).	-37.2	[8, 31, 62, 86]	78	5 success	Coordinates	published		valid	0-no_evidence					Y	PCG-CDS-exon	N	Not tested: not intergenic	4
PID0105	Zhou2012-xq	Meani	man-milR-13		GL698722.1:276059-276130:+	ADNJ00000000.1_scaffolds	KE384734.1:279714-279764:+	GCA_000426965.1_ASM42696v1	gene, TE	CGACGACUCUGGCGAGGACAA	FALSE	UUGUAGGCAACGACGACUCUGGCGAGGACAAGCCCAUUGUCCCCGUCAAGACCGUCGACAAGGCCCCGGCCC	.....(((..(((((..(((((((.((((((.....)))))).)))).))).))))).....))).......	-26.3	[8, 30, 36, 58]	50	5 success	Coordinates	published		valid	0-no_evidence					Y	PCG-CDS-exon	N	Not tested: not intergenic	4
PID0106	Zhou2012-xq	Meani	man-milR-14		GL698724.1:413670-413877:+	ADNJ00000000.1_scaffolds	KE384749.1:1379803-1380000:+	GCA_000426965.1_ASM42696v1	gene, TE	UUAAAGAUGUGGAAAAGAAGGC	FALSE	AAUCAGACCAUUAAAGAUGUGGAAAAGAAGGCGCGAAUAAGGGCCAAGCCAAAGUAAAGCACCAAAAAUACAGCUAAACAAGCACCUAAGGCACCUGUCAGCUGCCUUUUUAAAUGCCUUAAGUGCCUGUUAAGAUACAUUUGUGGUGCUUUUUUUUUGGCUCUGCCCUUAUUUCCGCCUUCUUUCUAUAUCUUUAAUGGCCUGGUUA	((((((.((((((((((((((((((.(((((((.((((((((((..((((((((.(((((((((.((((....((.((((.((((.(((((((.....................))))))).)))).)))).))....)))).)))))))))..))))))))..)))))))))).))))))))))))))))))))))))).)))))).	-103.8	[8, 31, 176, 198]	190	5 success	Coordinates	published		valid	0-no_evidence					Y	none	Y	N	3
PID0107	Zhou2012-xq	Meani	man-milR-15		GL698755.1:2326-2469:+	ADNJ00000000.1_scaffolds	KE384724.1:1427853-1427974:+	GCA_000426965.1_ASM42696v1	gene, TE	GAUGUCGAAUCGUGCCGGGGCUC	FALSE	CUGAACCACGGCAGAUGUCGAAUCGUGCCGGGGCUCAUCAACCCUCUGCUGGUUAUCGACGUGUACUGGAAUUCAAGAUACACGCGCGGAUAACCAGCAGAGCCACGAUGAGCCCCGGCACGAUUCGAGAUCUACCGUGGUUUA	.((((((((((.((((.((((((((((((((((((((((....((((((((((((((..((((((((........)).))))))....))))))))))))))....)))))))))))))))))))))).)))).))))))))))	-103.9	[11, 35, 109, 133]	122	5 success	Coordinates	published		valid	0-no_evidence					Y	none	Y	N	3
PID0108	Kang2013-jt	Trree	Tre-milR-1		GL985071.1:434551-434640:+	GCA_000167675.2_v2.0_genomic	GL985071.1:434560-434631:+	GCA_000167675.2_v2.0	gene, TE	AGCCGGCUGUUGACGUAGGUGA	FALSE	UGACUUGCAGCAGCCGGCUGUUGACGUAGGUGAAGAGGUACUUUUGCGACCACUCGAGGCCGAACGUGUUGAAGCCCGCGCUGUAAGUGG	..(((((((((.((.((((....((((.(((...(((...............)))...)))..)))).....)))).)))))))))))..	-35	[9, 32, 56, 80]	71	4 locality_found	Fail/lacking	recovered		valid	2-pass					Y	PCG-CDS-exon	N	Not tested: not intergenic	4
PID0109	Kang2013-jt	Trree	Tre-milR-2		GL985059.1:95445-95501:-	GCA_000167675.2_v2.0_genomic	GL985059.1:95446-95500:-	GCA_000167675.2_v2.0	gene, TE	UCUCUGUUGGAGUUGAGGGGG	FALSE	AGGUCUCUGUUGGAGUUGAGGGGGGCUUUGCUGUCGUUUACUUUCGACGGGGUAACU	.(((((((((((((((.((.((.(((...))).)).)).)).))))))))))..)))	-19.2	[1, 23, 31, 55]	54	4 locality_found	Fail/lacking	recovered		valid	1-fail					Y	PCG-CDS-exon	N	Not tested: not intergenic	4
PID0110	Kang2013-jt	Trree	Tre-milR-3		GL985075.1:508283-508347:+	GCA_000167675.2_v2.0_genomic	GL985075.1:508288-508340:+	GCA_000167675.2_v2.0	gene, TE	GGGAGAAUGCGCCGUGAUUGU	FALSE	GCUCGGCUUUCACGCCGCCUUCUCUUUUUCUUCGGGAGGGAGAAUGCGCCGUGAUUGUUCUGAGU	(((((((..(((((.(((.(((((((((((...))))))))))).))).)))))..)..))))))	-29.2	[5, 27, 35, 57]	52	4 locality_found	Fail/lacking	recovered		valid	3-pass_rep	RF00009	4.72e-29	Nuclear RNase P	other	Y	none	Y	N	4
PID0111	Kang2013-jt	Trree	Tre-milR-4		GL985063.1:423138-423230:-	GCA_000167675.2_v2.0_genomic	GL985063.1:423149-423218:-	GCA_000167675.2_v2.0	gene, TE	AGCAGCGACGGCGGAACUCUGC	FALSE	GUACAGGAUCCAAAAGCAGCGACGGCGGAACUCUGCCUCGAUGGGGACGAGCCCCUCGAGGGCAGCCUCCUCGUGCAGCUGCAUGACCUGCGC	((.((((.((....(((.((.((((.(((...(((((((((.((((.....)))))))).)))))..))))))))).)))....)))))).))	-40.9	[12, 35, 61, 81]	69	4 locality_found	Fail/lacking	recovered		valid	2-pass					Y	PCG-CDS-exon	N	Not tested: not intergenic	4
PID0112	Kang2013-jt	Trree	Tre-milR-5		GL985081.1:411129-411384:-	GCA_000167675.2_v2.0_genomic	GL985081.1:411151-411359:-	GCA_000167675.2_v2.0	gene, TE	CCCCGUUUAUCUGAUCAACGC	TRUE	GGUGCCGGCGUCGCAUAUUAUCAUGACCCCGUUUAUCUGAUCAACGCCGGAGUCUGCCUUGCAUUCGGUGUAGUGGGCAAUGUCGAACCGCUCGCCCGUGUGGGCAAUCAUAUACGGGAAGUUGGCGGAUUCAGGGGCGCCCGCCUCGACCCACAUGCCCGGGGUCCCGAUGGCAGACUGUCCGCCGGCCUCGGCAGCAGCGGAGGUGCCGGCUCCGGGGGAGAUGUAAGAGGUCAUGCUCAUGGCAGAGGGCAUC	((((((..(...((.(((...(((((((...(((((...(((..(.(((((((((((((((..(((((.(((((((((......((((((((..((((((((........)))))))).....))))).))).(((((....)))))).))))).))))))))....))).))))))))....(((((((((.((....)).)))..)))))).)))).)..)))))))).)))))))...))))).)..))))))	-109.6	[25, 48, 215, 233]	208	4 locality_found	Fail/lacking	recovered		valid	2-pass					Y	PCG-CDS-exon	N	Not tested: not intergenic	4
PID0113	Kang2013-jt	Trree	Tre-milR-6		GL985077.1:244508-244572:-	GCA_000167675.2_v2.0_genomic	GL985077.1:244511-244569:-	GCA_000167675.2_v2.0	gene, TE	CUACGGAGCUGGAGGAGGA	TRUE	GUGACGCCCCCGCCUACUACGACUCCGCCUGCCACUACUACGGAGCUGGAGGAGGACUGCGAGAC	((..(((..((.(((.(((.(.(((((.............)))))))))))).))...)))..))	-17.7	[3, 28, 38, 61]	58	4 locality_found	Fail/lacking	recovered		valid	2-pass					Y	PCG-CDS-exon	N	Not tested: not intergenic	4
PID0114	Kang2013-jt	Trree	Tre-milR-7		GL985056.1:494435-494572:-	GCA_000167675.2_v2.0_genomic	GL985056.1:494436-494571:-	GCA_000167675.2_v2.0	gene, TE	UCAAGGGGAAUCUGAGGCAG	FALSE	CGCUCAAGGGGAAUCUGAGGCAGCGCAAACGUGAGUUGACGACCAAGGGCUUCCAGAUCCGGCUUGAGUCGCUCAACAAGCACCGAGUGAAAGGCGUUGGUCACAUUAAGUCGCUUGUGCUUCAGGACGGGCUGGGUG	((((((.(.....(((((...(((((((..((((.((((.((((((.(.(((.((..((.((((((..........))))).).)).)).))).).))))))...)))).)))))))))))))))).....)))))))	-46.3	[1, 22, 119, 136]	135	4 locality_found	Fail/lacking	recovered		valid	1-fail					Y	PCG-CDS-exon	N	Not tested: not intergenic	4
PID0115	Kang2013-jt	Trree	Tre-milR-8		-	GCA_000167675.2_v2.0_genomic	-	-	-	CUCGAGGGAAGUGGAGAUGGA	-	-	-	-	-	-	4 locality_found	Fail/lacking	recovered		recovered no valid hairpins	-	-	-	-	-	-	not evaluated: hairpin invalid	-	-	-
PID0116	Kang2013-jt	Trree	Tre-milR-9		GL985062.1:984925-984977:+	GCA_000167675.2_v2.0_genomic	GL985062.1:984926-984976:+	GCA_000167675.2_v2.0	gene, TE	UGGCAUGUUAGACAAGUUGCG	FALSE	CGUUGGCAUGUUAGACAAGUUGCGUGAAGCAAGAGAUGAUCCGGAUGCCAUUG	...((((((.(..((((..((((.....))))....)).)).).))))))...	-12.3	[1, 23, 27, 51]	50	1 no_coords	Fail/lacking	recovered		valid	2-pass					Y	PCG-intron	N	Not tested: not intergenic	3
PID0117	Kang2013-jt	Trree	Tre-milR-10		GL985056.1:628669-628739:+	GCA_000167675.2_v2.0_genomic	GL985056.1:628675-628733:+	GCA_000167675.2_v2.0	gene, TE	AGGCUGUACUGUAGGGCAG	FALSE	GCUGCAGGAGGCUGUACUGUAGGGCAGCGCAAGGAAGUCGAUUCGUUCUUGGUCUCAGUGUGUCACGCGGC	(((((..((.((...((((.(((.(((.(.((.(((.....))).)))))).))))))))).))..)))))	-22.3	[6, 26, 48, 64]	58	1 no_coords	Fail/lacking	recovered		valid	1-fail					Y	none	Y	N	4
PID0118	Kang2013-jt	Trree	Tre-milR-11		GL985064.1:154854-154920:+	GCA_000167675.2_v2.0_genomic	GL985064.1:154862-154911:+	GCA_000167675.2_v2.0	gene, TE	UGGAGACGUGGAGCCGGA	FALSE	UGCUCAUCUUUGGAGACGUGGAGCCGGAUAGCCUUUCUCUCAGCCCGCGGAAUCUAAUGAUCUGGCA	((((.(((.(((((..(((((.((..((.((.....)).)).)))))))...))))).)))..))))	-20.3	[8, 27, 39, 57]	49	4 locality_found	Fail/lacking	recovered		valid	1-fail					Y	PCG-CDS-exon	N	Not tested: not intergenic	4
PID0119	Kang2013-jt	Trree	Tre-milR-12		GL985068.1:231017-231109:+	GCA_000167675.2_v2.0_genomic	GL985068.1:231017-231109:+	GCA_000167675.2_v2.0	gene, TE	GGUGCGGGCUGGCGGCGG	FALSE	GUGGUGCGGGCUGGCGGCGGCGGCGGCGGCGGCGUUGCCAACGAGCGCACGCUGGGCUACAGCCUGUCGGUGCUGCCGCGGGCCAAGGACGAC	((.((.(.((((.(((((((((.(((((((((((((.......))))).))))((((....)))))))).))))))))).))))..).)).))	-56.4	[0, 19, 72, 92]	92	4 locality_found	Fail/lacking	recovered		valid	1-fail					Y	PCG-CDS-exon	N	Not tested: not intergenic	4
PID0120	Kang2013-jt	Trree	Tre-milR-13		GL985073.1:372893-372984:-	GCA_000167675.2_v2.0_genomic	GL985073.1:372902-372974:-	GCA_000167675.2_v2.0	gene, TE	CCAGCAGGACUAUGACGACG	FALSE	GGGCUUUGUCGACCAGCAGGACUAUGACGACGACUUCCUCGACGAAGAGGAAUACUACCAAGACGUCCCUCACAACCAGCGCCGCAAUGCCC	((((.(((.((....((.((....(((.((((.(((((((......))))).........)).))))..)))...)).))..))))).))))	-25.5	[10, 31, 63, 82]	72	4 locality_found	Fail/lacking	recovered		valid	1-fail					Y	PCG-CDS-exon	N	Not tested: not intergenic	4
PID0121	Lau2013-sw	Tamar	PM-milR-M1		-	AGCC01.1	-	-	-	GAGAAACGCCUUAUGAUCGAC	-	-	-	-	-	-	1 no_coords	Fail/lacking	recovered	Knock-down	recovered no valid hairpins	-	-	-	-	-	-	not evaluated: hairpin invalid	-	-	-
PID0122	Lau2013-sw	Tamar	PM-milR-M2		-	AGCC01.1	-	-	-	GUCCUAUAGUAAAGCCAGUC	-	-	-	-	-	-	1 no_coords	Fail/lacking	recovered		recovered no valid hairpins	-	-	-	-	-	-	not evaluated: hairpin invalid	-	-	-
PID0123	Lau2013-sw	Tamar	PM-milR-MC3		AGCC01002316.1:2918-3034:-	AGCC01.1	DS995900.1:3970188-3970273:-	GCA_000001985.1_JCVI-PMFA1-2.0	gene, TE	UGAUAUCAAAGUGGGCUAUC	FALSE	GAUUCGGACAUUGGUAUGAUAUCAAAGUGGGCUAUCUCCCAUGGUGCGGAGCCAACUGCCAUUGGUCUCCUAGAGAUUUGCUGCUUCGCUGUUGAUAUCUUACAGCUCUCACAAAUC	((((.(((.....(((.(((((((((((((((.((((((((..(.((((......)))))..))).......)))))..)))....)))).)))))))).))).....)).).))))	-29.9	[14, 35, 74, 101]	87	1 no_coords	Fail/lacking	recovered		valid	1-fail					Y	TE	N	Not tested: not intergenic	4
PID0124	Lau2013-sw	Tamar	PM-milR-MC4		-	AGCC01.1	-	-	-	UCAAGUCAACCCUUACUC	-	-	-	-	-	-	1 no_coords	Fail/lacking	recovered		recovered no valid hairpins	-	-	-	-	-	-	not evaluated: hairpin invalid	-	-	-
PID0125	Lau2013-sw	Tamar	PM-milR-MC5		AGCC01002243.1:9592-9735:+	AGCC01.1	DS995901.1:1354873-1354961:+	GCA_000001985.1_JCVI-PMFA1-2.0	gene, TE	UUGCUAUGAUGAAAGCUGAGCA	FALSE	UGAAAAGAUCAUCCAGUGGCUCAGGAGAUUGCUAUGAUGAAAGCUGAGCAUAUGAACCAACGCGCCGGUUGCCUUUGGCCACUGUACUCCGUACUCAGAUUACUCUGUUUUGUUCAUUGAUUUUUUUUGUUACUAUUUUUGUCG	.((((((((.....((((((..((((((((...((((..(((((.(((....(((....(((...((((.(((...))).)))).....)))..))).....))).)))))..)))).))))))))..)))))))))))).)).	-28.2	[26, 49, 100, 121]	95	1 no_coords	Fail/lacking	recovered		valid	3-pass_rep					Y	none	Y	N	2
PID0126	Lau2013-sw	Tamar	PM-milR-MC6		AGCC01002261.1:13289-13377:-	AGCC01.1	DS995900.1:1072393-1072474:+	GCA_000001985.1_JCVI-PMFA1-2.0	gene, TE	UUCCGAUACAAUU	TRUE	UUAACGUUUAAAUUUCCGAUACAAUUCUGACUUCUUUCUGUCUAGGCUACAUUGGCGAGUUCGAGGAGAUUGAUGACCACCGCUCUGGC	....((((..(((((((.....(((((.(((........)))...((((...)))))))))...))))))))))).(((......))).	-13.8	[0, 25, 57, 81]	81	1 no_coords	Fail/lacking	recovered		valid	2-pass					Y	PCG-CDS-exon	N	Not tested: not intergenic	4
PID0127	Lau2013-sw	Tamar	PM-milR-MC7		-	AGCC01.1	-	-	-	UAGGAUUAGGAUUAGGAUUA	-	-	-	-	-	-	1 no_coords	Fail/lacking	recovered		recovered no valid hairpins	-	-	-	-	-	-	not evaluated: hairpin invalid	-	-	-
PID0128	Lau2013-sw	Tamar	PM-milR-MC8		AGCC01002669.1:32256-32338:-	AGCC01.1	DS995899.1:2730271-2730347:-	GCA_000001985.1_JCVI-PMFA1-2.0	gene, TE	UUUCUACAGCUGCUGAACGUC	FALSE	AGGGUCGUCCAGCAGCUGUGGAAUACUUCUUCGCGGGCAACCUAUUCCACUCAAGUAGUUUUCUACAGCUGCUGAACGUCCCU	((((.(((.((((((((((((((.(((.(((.(.(((........))).)..))).))).)))))))))))))).))).))))	-41.7	[3, 25, 57, 79]	76	1 no_coords	Fail/lacking	recovered		valid	2-pass					Y	none	Y	N	3
PID0129	Lau2013-sw	Tamar	PM-milR-MC9		AGCC01002674.1:511-652:-	AGCC01.1	DS995901.1:2269392-2269514:-	GCA_000001985.1_JCVI-PMFA1-2.0	gene, TE	UUUUUAGCUAAUGGUGGGAUU	TRUE	AGAUAUCAUAUAAUUGCCUUUUUAGCUAAUGGUGGGAUUACUUUUGAAUCAUGCAAGUUGGGUCUAGGAUUAAGGAUCGUUAUUCUUAUGACUUUGCAUCCGUUUAUCUUGCUUUUGGCGUUGGGUGUAAUUGGCGGUUUCU	(((.(((...((((((((((....(((((.((((((((.......((((.((((((....(((((((((.(((......))).))))).))))))))))..)))))))))))).)))))...))).)))))))..))).)))	-34.5	[10, 30, 112, 132]	122	1 no_coords	Fail/lacking	recovered		valid	2-pass					Y	PCG-UTR-exon	N	Not tested: not intergenic	3
PID0130	Lau2013-sw	Tamar	PM-milR-MC10		AGCC01002778.1:17635-17729:+	AGCC01.1	DS995905.1:45440-45525:+	GCA_000001985.1_JCVI-PMFA1-2.0	gene, TE	UCGACUGGCUCACCUGAUGCC	FALSE	GGCAUGUCGACUGGCUCACCUGAUGCCUGACUUUACCCUUACGCAUCUUGAAAGGCUACCAAGUGAGGUCAAAGGAAUUAUGAGCCUUCCUUGCC	((((....((..(((((((((...((((.((((((.((((.((.....)).)))).))..)))).))))...))).....)))))).))..))))	-28.6	[4, 26, 66, 92]	88	1 no_coords	Fail/lacking	recovered		valid	1-fail					Y	PCG-CDS-exon	N	Not tested: not intergenic	4
PID0131	Lau2013-sw	Tamar	PM-milR-MC11		AGCC01001431.1:2074-2130:+	AGCC01.1	DS995904.1:1412346-1412402:+	GCA_000001985.1_JCVI-PMFA1-2.0	gene, TE	UCGAUGUACUUCCUUGUGGA	FALSE	UCUUGAGACGAGGAAUCGAGACUCGAAAGAGAUUAAAUCGAUGUACUUCCUUGUGGA	.......((((((((((((..(((....)))......))))).....)))))))...	-13.5	[0, 20, 35, 56]	56	1 no_coords	Fail/lacking	recovered		valid	1-fail					Y	PCG-UTR-exon	N	Not tested: not intergenic	4
PID0132	Lau2013-sw	Tamar	PM-milR-MC12		AGCC01002778.1:15894-16012:-	AGCC01.1	DS995901.1:2651908-2651929:+	GCA_000001985.1_JCVI-PMFA1-2.0	gene, TE	UCGAUCUGCUGUAGACACUC	TRUE	GCGAUAGUACGGUUGGAUUGCCUUGCAACUUGUGUCGAUACAGAGCCUAGAUUCCAAGACAUUGGAAGUGGGUCAUGGUGCCAACAAGUUGUGUUCAUCGAUCUGCUGUAGACACUCGC	((((...((((((.((((((...((((((((((.......((..(((((..((((((....)))))).)))))..))......)))))))))).....)))))))))))).....))))	-39.1	[5, 26, 89, 111]	106	1 no_coords	Fail/lacking	recovered		valid	2-pass					Y	none	Y	N	3
PID0133	Lau2013-sw	Tamar	PM-milR-MC13		AGCC01002778.1:18695-18783:-	AGCC01.1	DS995905.1:46501-46562:-	GCA_000001985.1_JCVI-PMFA1-2.0	gene, TE	UCUUGGGGUGGUAACGCAACU	TRUE	CUGAGCUGUGCCACUCGAUCAUCUUGGGGUGGUAACGCAACUUGACAGAACUGACCACGAUACCCCAGAUGAUCUGCGAGCCAUAUCAG	((((..((.(((.(..((((((((.((((((......((..((....))..)).......)))))))))))))).).).))))..))))	-27	[6, 27, 63, 82]	76	1 no_coords	Fail/lacking	recovered		valid	2-pass					Y	near-PCG	N	Not tested: not intergenic	3
PID0134	Lau2013-sw	Tamar	PM-milR-MC14		-	AGCC01.1	-	-	-	UAAGAGCUGUACAUAUGUAAG	-	-	-	-	-	-	1 no_coords	Fail/lacking	recovered		recovered no valid hairpins	-	-	-	-	-	-	not evaluated: hairpin invalid	-	-	-
PID0135	Lau2013-sw	Tamar	PM-milR-MC15		AGCC01001641.1:535-641:+	AGCC01.1	DS995907.1:93219-93326:-	GCA_000001985.1_JCVI-PMFA1-2.0	gene, TE	AUCCGGAUCGAGUUAUUCAC	FALSE	UUUAAUGGCAUUUCCGCAGGCUCGUACGGUGGCAUAUAAAGCUCAACUAUUCGGAAUAGCUUCGCAGCCACUGGAUUAGUGCCUUUCAUCCGGAUCGAGUUAUUCAC	...((((((...((((.((((.(...(((((((.....(((((...((....))...)))))....))))))).....).))))......))))....))))))...	-26.3	[0, 20, 85, 106]	106	1 no_coords	Fail/lacking	recovered		valid	1-fail					Y	TE	N	Not tested: not intergenic	4
PID0136	Lau2013-sw	Tamar	PM-milR-MC16		AGCC01001770.1:6466-6526:+	AGCC01.1	DS995904.1:2601863-2601879:-	GCA_000001985.1_JCVI-PMFA1-2.0	gene, TE	CAUAAGGUCGAGAGUCUCGCA	FALSE	AAGGAGACGUGACGCACUUGAGAGAUAUUUUGUGGCAUCUCAUAAGGUCGAGAGUCUCGCA	...(((((.(..((..((((.(((((.((....)).))))).))))..)).).)))))...	-17.5	[0, 23, 38, 60]	60	1 no_coords	Fail/lacking	recovered		valid	1-fail					Y	none	Y	N	4
PID0137	Lau2013-sw	Tamar	PM-milR-MC17		-	AGCC01.1	-	-	-	UGGCGGACGCGAUGGUGGAGG	-	-	-	-	-	-	1 no_coords	Fail/lacking	recovered		recovered no valid hairpins	-	-	-	-	-	-	not evaluated: hairpin invalid	-	-	-
PID0138	Lau2013-sw	Tamar	PM-milR-YC1		-	AGCC01.1	-	-	-	UGCCAUUGCUAAGUCAAGG	-	-	-	-	-	-	1 no_coords	Fail/lacking	recovered		recovered no valid hairpins	-	-	-	-	-	-	not evaluated: hairpin invalid	-	-	-
PID0139	Lau2013-sw	Tamar	PM-milR-YC2		AGCC01002538.1:3094-3186:-	AGCC01.1	DS995904.1:1243416-1243488:+	GCA_000001985.1_JCVI-PMFA1-2.0	gene, TE	CAGCGGUGAUGACAACCAAAGA	TRUE	UCUGCCCUGGGUUGUUUUACAUUUGUUUCGAUAGUUCUACAAGCCUGAAAACCAGGCUUCUAUUUCAGCGGUGAUGACAACCAAAGAGACAGA	(((((.((.(((((((((((...((((..(((((......(((((((.....))))))))))))..)))))))).)))))))..)).).))))	-27.5	[9, 29, 63, 81]	72	1 no_coords	Fail/lacking	recovered		valid	2-pass					Y	PCG-UTR-exon	N	Not tested: not intergenic	3
PID0140	Lau2013-sw	Tamar	PM-milR-YC3		AGCC01001728.1:6330-6411:+	AGCC01.1	DS995899.1:4977388-4977469:-	GCA_000001985.1_JCVI-PMFA1-2.0	gene, TE	CCGCUUCUAAAAUUGCUAGA	TRUE	GACCGCUUCUAAAAUUGCUAGAGCUUGCCGUUUCCGAAAUACCAUUUCACCAGGACGAGCAAGUGUGGACAGAGAAGCAAGA	....((((((....((((((..(((((((((((..(((((...)))))....))))).)))))).))).)))))))))....	-23	[0, 23, 62, 81]	81	1 no_coords	Fail/lacking	recovered		valid	2-pass					Y	PCG-UTR-exon	N	Not tested: not intergenic	3
PID0141	Lau2013-sw	Tamar	PM-milR-YC4		-	AGCC01.1	-	-	-	UUGCUAUGAUGAAAGCUGAGCA	-	-	-	-	-	-	1 no_coords	Fail/lacking	recovered		recovered no valid hairpins	-	-	-	-	-	-	not evaluated: hairpin invalid	-	-	-
PID0142	Lau2013-sw	Tamar	PM-milR-YC5		AGCC01002129.1:5642-5702:+	AGCC01.1	DS995901.1:566309-566365:-	GCA_000001985.1_JCVI-PMFA1-2.0	gene, TE	UUUCUUGUCUACCUUUCGAGU	FALSE	GUCUUUUCUUGUCUACCUUUCGAGUUGUUUCUAACAGUUCGAAAGGCAUUCGAGAAAGGAC	(((((((((((....((((((((((((((...))))))))))))))....)))))))))))	-28.2	[2, 24, 36, 58]	56	1 no_coords	Fail/lacking	recovered		valid	2-pass					Y	PCG-CDS-exon	N	Not tested: not intergenic	4
PID0143	Lau2013-sw	Tamar	PM-milR-YC6		AGCC01002723.1:21976-22056:+	AGCC01.1	DS995904.1:1877556-1877634:+	GCA_000001985.1_JCVI-PMFA1-2.0	gene, TE	UUCUCGGUGGCGAUGUCCAUU	FALSE	CGAUUCUCGGUGGCGAUGUCCAUUUAGCAGCCCUCGGUCGAUUCUAUUCGAAAGUGAGCUUGAAUAUCCCCAUCGAGAACG	((.((((((((((.(((((.((......(((.(.(..((((......))))..).).))))).))))).))))))))))))	-28	[1, 23, 58, 79]	78	1 no_coords	Fail/lacking	recovered		valid	2-pass					Y	PCG-CDS-exon	N	Not tested: not intergenic	4
PID0144	Lau2013-sw	Tamar	PM-milR-YC7		AGCC01002705.1:36246-36318:-	AGCC01.1	DS995900.1:3238975-3239047:-	GCA_000001985.1_JCVI-PMFA1-2.0	gene, TE	CCUUCAGAUCUGGGCUAUGCCC	FALSE	AGGUAUCGCACACUCUGAGCAAAAUGAGCAUUCAUCAGAUACAGUUCAUUUCCUUCAGAUCUGGGCUAUGCCC	.(((((.((.((.((((((..((((((((..((....))....))))))))..))))))..)).)).))))).	-21.5	[0, 22, 49, 72]	72	1 no_coords	Fail/lacking	recovered		valid	2-pass					Y	PCG-CDS-exon	N	Not tested: not intergenic	4
PID0145	Chen2014-iq	Fuoxy	fox_milRNA_1	a	CM000603.1:1054850-1054915:+	GCA_000149955.1_ASM14995v1_genomic	CM000603.1:1054850-1054915:+	GCA_000149955.2_ASM14995v2	gene, TE	UGCUAGGGUAGAGAAUUUUUGCAGGC	FALSE	UCCUGUAAAAGUUUUUCCUUGGCACCCGAUGUUAGCGCUCUGCUAGGGUAGAGAAUUUUUGCAGGC	.(((((((((((((((((((((((..((.......))...))))))))..))))))))))))))).	-26	[0, 25, 38, 65]	65	1 no_coords	Fail/lacking	recovered	Degradome	valid	1-fail					Y	none	Y	N	4
PID0146	Chen2014-iq	Fuoxy	fox_milRNA_1	b	DS231738.1:171924-171989:+	GCA_000149955.1_ASM14995v1_genomic	CM000602.2:1203536-1203601:+	GCA_000149955.2_ASM14995v2	gene, TE	UGCUAGGGUAGAGAAUUUUUGCAGGC	FALSE	UCCUGUAAAAACUUUUCCUUGGCACCCGCUGUUAGCGCUCUGCUAGGGUAGAGAAUUUUUGCAGGC	.((((((((((((((.((((((((..((((...))))...)))))))).))))..)))))))))).	-27.9	[0, 25, 38, 65]	65	1 no_coords	Fail/lacking	recovered	Degradome	valid	1-fail					Y	none	Y	N	4
PID0147	Chen2014-iq	Fuoxy	fox_milRNA_1	c	CM000600.1:778438-778503:+	GCA_000149955.1_ASM14995v1_genomic	CM000602.2:1203536-1203601:+	GCA_000149955.2_ASM14995v2	gene, TE	UGCUAGGGUAGAGAAUUUUUGCAGGC	FALSE	UCCUGUAAAAACUUUUCCUUGGCACCCGCUGUUAGCGCUCUGCUAGGGUAGAGAAUUUUUGCAGGC	.((((((((((((((.((((((((..((((...))))...)))))))).))))..)))))))))).	-27.9	[0, 25, 38, 65]	65	1 no_coords	Fail/lacking	recovered	Degradome	valid	1-fail					Y	none	Y	N	4
PID0148	Chen2014-iq	Fuoxy	fox_milRNA_1	d	CM000591.1:1274902-1274967:-	GCA_000149955.1_ASM14995v1_genomic	CM000594.1:3185424-3185489:+	GCA_000149955.2_ASM14995v2	gene, TE	UGCUAGGGUAGAGAAUUUUUGCAGGC	FALSE	UCCUGUAAAACUUUUUCCUUGGCACCCGCUGUUAGCGCUCUGCUAGGGUAGAGAAUUUUUGCAGGC	.(((((((((.(((((((((((((..((((...))))...))))))))..))))).))))))))).	-26.4	[0, 25, 38, 65]	65	1 no_coords	Fail/lacking	recovered	Degradome	valid	1-fail					Y	TE	N	Not tested: not intergenic	4
PID0149	Chen2014-iq	Fuoxy	fox_milRNA_1	e	CM000602.1:1153636-1153701:-	GCA_000149955.1_ASM14995v1_genomic	CM000602.2:1345538-1345603:-	GCA_000149955.2_ASM14995v2	gene, TE	UGCUAGGGUAGAGAAUUUUUGCAGGC	FALSE	UCCUGUAAAAAUUUUUCCUUGGCACCCGCUGUUAGCGCGCUGCUAGGGUAGAGAAUUUUUGCAGGC	.(((((((((((((((((((((((.(((((...)))).).))))))))..))))))))))))))).	-31.9	[0, 25, 38, 65]	65	1 no_coords	Fail/lacking	recovered	Degradome	valid	1-fail					Y	none	Y	N	4
PID0150	Chen2014-iq	Fuoxy	fox_milRNA_1	f	CM000591.1:1015082-1015147:-	GCA_000149955.1_ASM14995v1_genomic	CM000594.1:3185424-3185489:+	GCA_000149955.2_ASM14995v2	gene, TE	UGCUAGGGUAGAGAAUUUUUGCAGGC	FALSE	UCCUGUAAAACUUUUUCCUUGGCACCCGCUGUUAGCGCUCUGCUAGGGUAGAGAAUUUUUGCAGGC	.(((((((((.(((((((((((((..((((...))))...))))))))..))))).))))))))).	-26.4	[0, 25, 38, 65]	65	1 no_coords	Fail/lacking	recovered	Degradome	valid	1-fail					Y	TE	N	Not tested: not intergenic	4
PID0151	Chen2014-iq	Fuoxy	fox_milRNA_1	g	CM000594.1:3442366-3442431:+	GCA_000149955.1_ASM14995v1_genomic	CM000594.1:3185424-3185489:+	GCA_000149955.2_ASM14995v2	gene, TE	UGCUAGGGUAGAGAAUUUUUGCAGGC	FALSE	UCCUGUAAAACUUUUUCCUUGGCACCCGCUGUUAGCGCUCUGCUAGGGUAGAGAAUUUUUGCAGGC	.(((((((((.(((((((((((((..((((...))))...))))))))..))))).))))))))).	-26.4	[0, 25, 38, 65]	65	1 no_coords	Fail/lacking	recovered	Degradome	valid	1-fail					Y	TE	N	Not tested: not intergenic	4
PID0152	Chen2014-iq	Fuoxy	fox_milRNA_2	a	CM000600.1:1053536-1054092:+	GCA_000149955.1_ASM14995v1_genomic	CM000600.1:1053542-1054086:+	GCA_000149955.2_ASM14995v2	gene, TE	GACAACGUGGCCGAGUGGUUAAGGC	FALSE	GGUAUCGUCGGCCAUGCUUCCAUUUGUAUUUGAGAACACUGCUAGCAAUAGAGGUAGUUGCACCCACGGAGUCAGCGGUGAAGACUGAAUCGGAGUCGGAGGUGGUAUUUUCGUCGACCUGAACUUCAGGCGUUGUUGGGUUAUCAGACAUCUUUGCAGUUGUCAACUAUGGGAACCAAGGUACGCAGAUGCUUUUAUCAGUAUGAUCGAUGAUAGAAAACGAUAUUGCGAGUGUAUAAUAUGAUCGUCGCAUGCACAAAGUGGAGGUGCCGCGCAAGCAACGGCAGCCGAGGCAUGGAAAACAACUCAUCCAGUAAGAGCAUAUGCGGUUCUGAAGAUGAAUGUAACCCCAGACAUAUUGCAAUAACGAGGUUGCUGAUCAUCAUGAGAUUAAGUCUU…	(((((((((((((((((((...(((((...((((....(((((.(((((((.(((......)))(((.(......).)))..((((.......))))...(((((..((((((((((((((....(((((((((...((((((.((..(((((((...(((.(((....))).)))..(((..((((.((((((((((..(((((..(((((((........(((((...)))))........)))))))))))).....((...(((((((.........))))).))...)).((((..........)))))))))))))).))))..))))))))))..))))))))..))).....(((((......)))))(((((.......))))).)))).…	-163.7	[6, 18, 524, 550]	544	1 no_coords	Fail/lacking	recovered	Degradome	valid	1-fail	RF00005	7.12e-11	tRNA	tRNA	Y	PCG-CDS-exon	N	Not tested: not intergenic	4
PID0153	Chen2014-iq	Fuoxy	fox_milRNA_2	b	CM000593.1:1735191-1735296:-	GCA_000149955.1_ASM14995v1_genomic	CM000593.1:1735198-1735287:-	GCA_000149955.2_ASM14995v2	gene, TE	GACAACGUGGCCGAGUGGUUAAGGC	FALSE	CAACGAUCUAGGACAACGUGGCCGAGUGGUUAAGGCGAUGCCCUGCUAUCUCUUCGAGACAUCAUAGGCAUUGUGUUCGCACGCGUAGGUUCGAAUCCUGCCGUUG	(((((...(((((...((.((((..(((((.((.((((((((.((...((((...))))...))..)))))))).)).)).)))...))))))..))))).)))))	-34.7	[9, 35, 72, 98]	89	1 no_coords	Fail/lacking	recovered	Degradome	valid	1-fail	RF00005	2.01e-46	tRNA	tRNA	Y	PCG-intron	N	Not tested: not intergenic	4
PID0154	Chen2014-iq	Fuoxy	fox_milRNA_2	c	CM000592.1:3323323-3323380:-	GCA_000149955.1_ASM14995v1_genomic	CM000592.1:3323324-3323379:-	GCA_000149955.2_ASM14995v2	gene, TE	UGUUCGCACGCGUAGGUUCGAAUC	TRUE	AAAGGCAUUGUGUUCGCACGCGUAGGUUCGAAUCCUGCCGUUGUCGAUAUUUGUUUUU	(((((((..(((((.(((((.(((((.......))))))).))).))))).)))))))	-16.6	[1, 29, 29, 56]	55	1 no_coords	Fail/lacking	recovered	Degradome	valid	2-pass	RF00005	3.48e-19	tRNA	tRNA	Y	none	Y	N	4
PID0155	Chen2014-iq	Fuoxy	fox_milRNA_2	d	CM000600.1:319690-319767:+	GCA_000149955.1_ASM14995v1_genomic	CM000600.1:319690-319767:+	GCA_000149955.2_ASM14995v2	gene, TE	GGCAUUGUGUUCGCACGCGUAGGUUCG	FALSE	CGUGGCCGAGUGGUUAAGGCGAUGCCCUGCUAUCUCUUCGGAGACAUCAUAGGCAUUGUGUUCGCACGCGUAGGUUCG	((.((((..(((((.((.((((((((.((...((((....))))...))..)))))))).)).)).)))...))))))	-26.3	[0, 27, 49, 77]	77	1 no_coords	Fail/lacking	recovered	Degradome	valid	1-fail	RF00005	5.73e-37	tRNA	tRNA	Y	none	Y	N	4
PID0156	Chen2014-iq	Fuoxy	fox_milRNA_2	e	CM000599.1:518251-518328:+	GCA_000149955.1_ASM14995v1_genomic	CM000599.1:518251-518328:+	GCA_000149955.2_ASM14995v2	gene, TE	GGCAUUGUGUUCGCACGCGUAGGUUCG	FALSE	CGUGGCCGAGUGGUUAAGGCGAUGCCCUGCUAUCUCUUCUGAGACAUCAUAGGCAUUGUGUUCGCACGCGUAGGUUCG	((.((((..(((((.((.((((((((.((...((((....))))...))..)))))))).)).)).)))...))))))	-26.5	[0, 27, 49, 77]	77	1 no_coords	Fail/lacking	recovered	Degradome	valid	1-fail	RF00005	5.73e-37	tRNA	tRNA	Y	none	Y	N	4
PID0157	Chen2014-iq	Fuoxy	fox_milRNA_3	a	CM000595.1:3292777-3292858:+	GCA_000149955.1_ASM14995v1_genomic	CM000595.1:3292780-3292855:+	GCA_000149955.2_ASM14995v2	gene, TE	CCGGUGUGGUGUAUCGGUUUAUCAUUCCGC	FALSE	GGCGCUGAAUAUAUAUUGAAGCUACACGGAUUCCUUCAGCAAAUCACAUCCGGUGUGGUGUAUCGGUUUAUCAUUCCGCGUU	.((((.(((((((.(((((.(((((((((((................)))).)))))))...))))).))).)))).)))).	-23.4	[3, 30, 47, 78]	75	1 no_coords	Fail/lacking	recovered	Degradome	valid	2-pass					Y	PCG-intron	N	Not tested: not intergenic	3
PID0158	Chen2014-iq	Fuoxy	fox_milRNA_3	b	CM000590.1:4637982-4638073:-	GCA_000149955.1_ASM14995v1_genomic	CM000590.1:4637982-4638073:-	GCA_000149955.2_ASM14995v2	gene, TE	CGGCGAGCGGGGUUCGACUCCCCGCACCGGA	TRUE	AUCCGGUGUGGUGUAUCGGUUAUCAUUCCGCGUUUUCAAUUGUUCUGCAAUUAAGCGCCGCGGCGAGCGGGGUUCGACUCCCCGCACCGGAG	.((((((((((.(..((((.....(((((((......((((((...))))))...(((....))).)))))))))))..).)))))))))).	-35.7	[0, 30, 66, 91]	91	1 no_coords	Fail/lacking	recovered	Degradome	valid	2-pass	RF00005	2.99e-19	tRNA	tRNA	Y	none	Y	N	4
PID0159	Chen2014-iq	Fuoxy	fox_milRNA_4		CM000601.1:1478121-1478227:-	GCA_000149955.1_ASM14995v1_genomic	CM000601.1:1478130-1478218:-	GCA_000149955.2_ASM14995v2	gene, TE	UGGAUGAAUCAAGCGUGGUAUGAU	TRUE	ACCUUUAUAUCGUAUCAUGCGUGAUUCAUCCAUCGCAAGGCGACAUAACCACCCUUUGUUCCUGGCGCAUAGCGAUGGAUGAAUCAAGCGUGGUAUGAUGUAAAGGU	((((((((((((((((((((.(((((((((((((((...(((.((.(((........)))..)).)))...))))))))))))))).))))))))))))))))))))	-60.3	[9, 33, 73, 97]	88	1 no_coords	Fail/lacking	recovered	Degradome	valid	2-pass					Y	none	Y	N	3
PID0160	Chen2014-iq	Fuoxy	fox_milRNA_5		-	GCA_000149955.1_ASM14995v1_genomic	-	-	-	UCCGGUAUGGUGUAGUGGC	-	-	-	-	-	-	1 no_coords	Fail/lacking	recovered	Degradome	recovered no valid hairpins	-	-	-	-	-	-	not evaluated: hairpin invalid	-	-	-
PID0161	Chen2014-iq	Fuoxy	fox_milRNA_6		-	GCA_000149955.1_ASM14995v1_genomic	-	-	-	GUUCCGUGGUCUAGUUGGUUAUGGCAUCU	-	-	-	-	-	-	1 no_coords	Fail/lacking	recovered	Degradome	recovered no valid hairpins	-	-	-	-	-	-	not evaluated: hairpin invalid	-	-	-
PID0162	Chen2014-iq	Fuoxy	fox_milRNA_7		-	GCA_000149955.1_ASM14995v1_genomic	-	-	-	CUUCCGUAGUAUAGUGGUCAGUAUGCA	-	-	-	-	-	-	1 no_coords	Fail/lacking	recovered	Degradome	recovered no valid hairpins	-	-	-	-	-	-	not evaluated: hairpin invalid	-	-	-
PID0163	Chen2014-iq	Fuoxy	fox_milRNA_8		-	GCA_000149955.1_ASM14995v1_genomic	-	-	-	CUUGAGACCCGGGUUCAAUUCCCGGC	-	-	-	-	-	-	1 no_coords	Fail/lacking	recovered	Degradome	recovered no valid hairpins	-	-	-	-	-	-	not evaluated: hairpin invalid	-	-	-
PID0164	Chen2015-xw	Fugra	Fg-milRNA-1		-	GCF_000240135.3_ASM24013v3_genomic	-	-	-	UCCGGUAUGGUGUAGUGGCUA	-	-	-	-	-	-	1 no_coords	Fail/lacking	recovered		recovered no valid hairpins	-	-	-	-	-	-	not evaluated: hairpin invalid	-	-	-
PID0165	Chen2015-xw	Fugra	Fg-milRNA-2		-	GCF_000240135.3_ASM24013v3_genomic	-	-	-	GAAUGUUGACCUCGGAUCAGG	-	-	-	-	-	-	1 no_coords	Fail/lacking	recovered		recovered no valid hairpins	-	-	-	-	-	-	not evaluated: hairpin invalid	-	-	-
PID0166	Chen2015-xw	Fugra	Fg-milRNA-3		-	GCF_000240135.3_ASM24013v3_genomic	-	-	-	GGUACUGUGGUCUAGUUGGU	-	-	-	-	-	-	1 no_coords	Fail/lacking	recovered		recovered no valid hairpins	-	-	-	-	-	-	not evaluated: hairpin invalid	-	-	-
PID0167	Chen2015-xw	Fugra	Fg-milRNA-4		NC_026477.1:7080433-7080530:+	GCF_000240135.3_ASM24013v3_genomic	CM000577.1:7080437-7080526:+	GCA_000240135.3_ASM24013v3	gene, TE	UGGAGAAAAUUGAGAAGGCUCGA	FALSE	AAGCUCGAGCCUUCUCAAUUUUCUCCAUGUUUUCAACAGAAAGAUCCAUAUGGACCCUUCUGUUGAUGACAUGGAGAAAAUUGAGAAGGCUCGAGCUU	(((((((((((((((((((((((((((((((.(((((((((.(.(((....))).).))))))))).)))))))))))))))))))))))))))))))	-72.4	[4, 28, 69, 93]	89	1 no_coords	Fail/lacking	recovered		valid	1-fail					Y	none	Y	N	4
PID0168	Chen2015-xw	Fugra	Fg-milRNA-5		NC_026474.1:5515555-5515663:+	GCF_000240135.3_ASM24013v3_genomic	CM000574.1:5515566-5515652:+	GCA_000240135.3_ASM24013v3	gene, TE	UAGGAAAGGCAGUUAACUAGGA	FALSE	AUCCAACCGCGUGUAGGAAAGGCAGUUAACUAGGAAUAGCUACGACAACAUGUCCUACAUAUUGUCUCAGUUAUUCCUGGUUAGCUCACUUUCUUACACGCGGUUGGAU	(((((((((((((((((((((..((((((((((((((((((..(((((.((((...)))).)))))..))))))))))))))))))..)))))))))))))))))))))	-71.2	[11, 34, 74, 97]	86	1 no_coords	Fail/lacking	recovered		valid	2-pass					Y	near-PCG	N	Not tested: not intergenic	3
PID0169	Chen2015-xw	Fugra	Fg-milRNA-6		NC_026474.1:5381086-5381215:-	GCF_000240135.3_ASM24013v3_genomic	CM000574.1:5381093-5381208:-	GCA_000240135.3_ASM24013v3	gene, TE	GAAAGUCAGGAAAUGUAUAUAUA	TRUE	UAUAAAGUAUUAUAUAUUUUUUGACUGUCAAUCGAGCCCUGUGCCUUUUUAACCUUAUUGUUGAGAACAAGGAGAUAUUAGGAAGGUUUAGGCUUCGAUUGAAAGUCAGGAAAUGUAUAUAUAUUUUGUA	((((((((((((((((((((((((((.(((((((((.((((.((((((((((.(((.(((((...))))).)))...)))))))))).)))).))))))))).)))))))))))))))).))))))))))	-54.8	[7, 29, 99, 122]	115	1 no_coords	Fail/lacking	recovered		valid	2-pass					Y	none	Y	N	3
PID0170	Chen2015-xw	Fugra	Fg-milRNA-7		NC_026475.1:7213772-7213881:+	GCF_000240135.3_ASM24013v3_genomic	CM000575.1:7213782-7213871:+	GCA_000240135.3_ASM24013v3	gene, TE	UAAACUGAGAAGAUUAGGGCU	FALSE	UGUAAGCCGAACCCUUAGCCUUUUCAUUUUACUUCAAGAUUCUCAAUAAAAGAUGAAUUCUUUAUUAAGAACUUCUAAGUAAACUGAGAAGAUUAGGGCUUCGGCUUACA	(((((((((((.((((((.(((((((.(((((((.(((.((((.((((((.((.....)))))))).)))))))..))))))).))))))).)))))).)))))))))))	-44.3	[10, 32, 77, 99]	89	1 no_coords	Fail/lacking	recovered		valid	1-fail					Y	none	Y	N	4
PID0171	Chen2015-xw	Fugra	Fg-milRNA-8		NC_026476.1:6749688-6749805:+	GCF_000240135.3_ASM24013v3_genomic	CM000576.1:6749688-6749805:+	GCA_000240135.3_ASM24013v3	gene, TE	GACAAGGAGUGGUCGAGCGGUA	FALSE	UUGACAAGGAGUGGUCGAGCGGUAUCCGUCCUAAAAUAAAAUAAAAAACCUACAAACCUAAAAGCCUUCUCUAAAAACAAACCUAAGCACUUUCACCCGUUCGACCACUCCUUGUCUU	..((((((((((((((((((((..........................................................................))))))))))))))))))))..	-36.83	[0, 23, 94, 117]	117	1 no_coords	Fail/lacking	recovered		valid	2-pass					Y	near-PCG	N	Not tested: not intergenic	3
PID0172	Chen2015-xw	Fugra	Fg-milRNA-9		NC_026474.1:6007803-6007882:+	GCF_000240135.3_ASM24013v3_genomic	CM000574.1:6007804-6007881:+	GCA_000240135.3_ASM24013v3	gene, TE	AAGAAAAUGGGAGCGAGCACA	FALSE	CUUAAGAAAAUGGGAGCGAGCACAUCACUGCCUCUUGUGAAACACCACUGGAAAGCUUGGUUCGCUUCUUAUUUCUUUUG	...((((((..((((((((((.((...((...(((.(((......))).))).))..))))))))))))..))))))...	-22.9	[1, 23, 57, 78]	77	1 no_coords	Fail/lacking	recovered		valid	2-pass					Y	PCG-UTR-exon	N	Not tested: not intergenic	3
PID0173	Chen2015-xw	Fugra	Fg-milRNA-10		NC_026475.1:3883502-3883567:-	GCF_000240135.3_ASM24013v3_genomic	CM000575.1:3883506-3883565:-	GCA_000240135.3_ASM24013v3	gene, TE	GGAGGAGGAGAAGGAGGAGUC	FALSE	GUUAUUCCUACCUAUUUCUUUUUUGGAGAGUUGCCGUCUGUGGAGGAGGAGAAGGAGGAGUCGAAC	...((((((.(((.(((((((((((.(((.......))).))))))))))).))))))))).....	-21.6	[2, 25, 39, 61]	59	1 no_coords	Fail/lacking	recovered		valid	2-pass					Y	none	Y	N	3
PID0174	Chen2015-xw	Fugra	Fg-milRNA-11		NC_026475.1:1669623-1669831:+	GCF_000240135.3_ASM24013v3_genomic	CM000575.1:1669631-1669823:+	GCA_000240135.3_ASM24013v3	gene, TE	AGGAUAUUAGUGGAUGGGUCGAG	FALSE	GACGACAACUCGACCUAUGAAUUAAUAUCCUCACUAAGGGGUAGCAGAAAAGUUAAUCUCUUAAGUCCUAGGUUACAAAAAUAAAUAGCCUAAAGAGUAUCGUCUAAGUAGCAUAAGCUGCCCUAAUAAUUUUAUCUUUUAUGCUUAUACCGGUCAAUUUUUCUAAUACCCUGAGGUGAGGAUAUUAGUGGAUGGGUCGAGUUGUCGUU	((((((((((((((((((..(((((((((((((((..((((((..(((((((((.(((...(((((..(((((((..........))))))).(((......)))..(((((....))))).....................)))))....))).)))))))))..))))))..)))))))))))))))..))))))))))))))))))	-87.8	[8, 32, 176, 200]	192	1 no_coords	Fail/lacking	recovered		valid	2-pass					Y	near-PCG	N	Not tested: not intergenic	3
PID0175	Chen2015-xw	Fugra	Fg-milRNA-12		NC_026477.1:7772480-7772750:-	GCF_000240135.3_ASM24013v3_genomic	CM000577.1:7772492-7772736:-	GCA_000240135.3_ASM24013v3	gene, TE	GGCAGCAUUGUUGACAGGGCCUU	FALSE	UUCUCGAGUAUCGGAACGGACUCUCUCGGCUUCUCGGUCCACAUGAACCAAUAGGAAGCUACCAAUUCCUCAUCUCGGGACACGUGCGAUCCACAUAUCACGUGCUGAGCUUCCAUGACUAAGCACAGUUGAGCUUUAUUGUCUUUUUAAAAUUUUCCGCUGCAUGUGAAUUCUCUUUUCCCUUUCUUCUUUAGAUAGCAAGAACGUUCGUCGCACGCUGUCUCGUGUAGAGAGUGGGCAGCAUUGUUGACAGGGCCUUUGGGCUCGAGGA	(((((((((..(.(((.((.((((.(((((......((((((..........(((((........)))))..((((((((((((((((((..((...((((((((..(((..........(((.(((((........)))))))).............)))))))))))..............(((((((......)).))))).))..)))))))).)))))))...)))..))))))......))))).))))))))).))))))))))	-78.9	[14, 40, 234, 258]	244	1 no_coords	Fail/lacking	recovered		valid	2-pass					Y	near-PCG	N	Not tested: not intergenic	3
PID0176	Chen2015-xw	Fugra	Fg-milRNA-13		-	GCF_000240135.3_ASM24013v3_genomic	-	-	-	GACAAGGAGUGGUCGAGCGGU	-	-	-	-	-	-	1 no_coords	Fail/lacking	recovered		recovered no valid hairpins	-	-	-	-	-	-	not evaluated: hairpin invalid	-	-	-
PID0177	Chen2015-xw	Fugra	Fg-milRNA-14		NC_026477.1:2340181-2340319:-	GCF_000240135.3_ASM24013v3_genomic	CM000577.1:2340192-2340310:-	GCA_000240135.3_ASM24013v3	gene, TE	GAAACUGGAUGGCUUCGUAGA	FALSE	UUGUCUGGUCCUACGAAAGCCGUUGGGUUUCUUGAUUGGCGUGUUCUGGUUUGUUUCUUGCCUAGUGUUCUCUGGGGGUUCAUAACUCCCUAGAUCCUUGUAGUACAGAAACUGGAUGGCUUCGUAGAUUGAGGGACAA	.(((((..(((((((((.((((((.(((((((..((((......(((((...(((...(.(((((......))))).).....)))...)))))......))))..))))))).)))))))))))))...)).))))).	-47.4	[9, 32, 105, 127]	118	1 no_coords	Fail/lacking	recovered		valid	2-pass					Y	PCG-UTR-exon	N	Not tested: not intergenic	3
PID0178	Chen2015-xw	Fugra	Fg-milRNA-15		NC_026477.1:579148-579259:-	GCF_000240135.3_ASM24013v3_genomic	CM000577.1:579153-579257:-	GCA_000240135.3_ASM24013v3	gene, TE	UUGGUUGGGAACGUUGGUU	TRUE	GAGUACCAGCAAUACCAAGACGCCGACAUCGACGACGAGGCUGAGGAGUACGAGGAGGGUGAGCCCGAGGAGUACGAGGGUUGAAUAUUGGUUGGGAACGUUGGUUAACAUC	....((((((....((((..((((....(((((..(........)..)).)))....))))(((((..(.....)..))))).........))))....)))))).......	-28.7	[2, 23, 85, 106]	104	1 no_coords	Fail/lacking	recovered		valid	2-pass					Y	PCG-CDS-exon	N	Not tested: not intergenic	4
PID0179	Chen2015-xw	Fugra	Fg-milRNA-16		NC_026477.1:265606-265662:-	GCF_000240135.3_ASM24013v3_genomic	CM000577.1:265606-265662:-	GCA_000240135.3_ASM24013v3	gene, TE	CGGGACGGUUUAACAUUCCC	TRUE	GGCCGGGACGGUUUAACAUUCCCCUUUCUCUAGUAGGGUCUGUGUAACCUCCCGGUU	.(((((((.((((..(((..(((((......))..)))..)))..))))))))))).	-26	[0, 25, 30, 56]	56	1 no_coords	Fail/lacking	recovered		valid	2-pass					Y	PCG-UTR-exon	N	Not tested: not intergenic	3
PID0180	Chen2015-xw	Fugra	Fg-milRNA-17		NC_026474.1:5052208-5052273:+	GCF_000240135.3_ASM24013v3_genomic	CM000574.1:5052217-5052263:+	GCA_000240135.3_ASM24013v3	gene, TE	GACAACGUGGCCGAGUGGUUA	TRUE	GUAUCCCCAAAUCUGUAGUCGCUUUCUUAUCCCCAAGACAACGUGGCCGAGUGGUUAAGGCGAUGC	(((((((..((((....(((((((((((......)))).)).))))).....))))..)).)))))	-13.8	[9, 27, 34, 55]	46	1 no_coords	Fail/lacking	recovered		valid	2-pass	RF00005	2.24e-10	tRNA	tRNA	Y	none	Y	N	4
PID0181	Chen2015-xw	Fugra	Fg-milRNA-18		NC_026474.1:2770658-2770778:-	GCF_000240135.3_ASM24013v3_genomic	CM000574.1:2770658-2770778:-	GCA_000240135.3_ASM24013v3	gene, TE	GAAGUGACAAGAAGAAGAACCGCC	TRUE	GGCCGAUUCUUUGCCUGCGUCGCUAUUUCCGCCGCCUUUGCCCUUGCUGCUGGUCUCUUCUGGAUGUUCACCAUCUGCUGCUGCAAGCCCGAGAGCCGAAGUGACAAGAAGAAGAACCGCC	(((.(.((((((..((..((((((.....((..((.((((..(((((.((.(((.......(((((.....)))))))))).)))))..)))).)))).)))))).))..))))))).)))	-32.6	[0, 29, 97, 120]	120	1 no_coords	Fail/lacking	recovered		valid	2-pass					Y	PCG-CDS-exon	N	Not tested: not intergenic	4
PID0182	Chen2015-xw	Fugra	Fg-milRNA-19		NC_026475.1:1439806-1439949:+	GCF_000240135.3_ASM24013v3_genomic	CM000575.1:1439806-1439947:+	GCA_000240135.3_ASM24013v3	gene, TE	GAAGGAGGAUAAGGAAGACGACG	TRUE	CUGCUGCUGCCCAGCUCGCUUCUCAGAACGCUGAGGACCACUCUGGUCACAACCACGGCGAGCCCAGCAAGGCUGUUGAGGCCGACGAGAAGAAGGAGGAUAAGGAAGACGACGAGGACGAGGAAGAGGAGGAGGAGGAGGAGG	((.((.((.(((..((((((((((((....)))).(((((...)))))....((.((((.((((......)))))))).))((..(........)..))..............)))).)))).....)).).)).)).))....	-41.9	[0, 18, 117, 141]	141	1 no_coords	Fail/lacking	recovered		valid	2-pass					Y	PCG-CDS-exon	N	Not tested: not intergenic	4
PID0183	Chen2015-xw	Fugra	Fg-milRNA-20		NC_026474.1:6263011-6263074:-	GCF_000240135.3_ASM24013v3_genomic	CM000574.1:6263017-6263068:-	GCA_000240135.3_ASM24013v3	gene, TE	GGAGUCUCGUGGAUUUGGCUUU	TRUE	UUGAAAAAUGCCAGAUCAUGCGAGACCCCCACACAAAGGAGUCUCGUGGAUUUGGCUUUGUCAA	.(((.(((.((((((((..(((((((.((........)).))))))).))))))))))).))).	-28	[6, 30, 35, 57]	51	1 no_coords	Fail/lacking	recovered		valid	2-pass					Y	PCG-CDS-exon	N	Not tested: not intergenic	4
PID0184	Chen2015-xw	Fugra	Fg-milRNA-21		-	GCF_000240135.3_ASM24013v3_genomic	-	-	-	AGGACUAGGGGGCGAAGCUCGG	-	-	-	-	-	-	1 no_coords	Fail/lacking	recovered		recovered no valid hairpins	-	-	-	-	-	-	not evaluated: hairpin invalid	-	-	-
PID0185	Chen2015-xw	Fugra	Fg-milRNA-22		NC_026477.1:591074-591183:+	GCF_000240135.3_ASM24013v3_genomic	CM000577.1:591074-591183:+	GCA_000240135.3_ASM24013v3	gene, TE	AGCAAGGAGUGGUGUAGUGGGAACCCG	TRUE	UCAGCAAGGAGUGGUGUAGUGGGAACCCGUUCCUAUUCUCCUAAACAAAAACUUACUCUCUCGCCUAAAAAGACCUACAAACUCUCACCCCACUGCACCCUCCUUGUUUU	..(((((((((.(((((((((((.................................................................))))))))))))))))))))..	-32.67	[0, 23, 87, 109]	109	1 no_coords	Fail/lacking	recovered		valid	2-pass					Y	none	Y	N	3
PID0186	Chen2015-xw	Fugra	Fg-milRNA-23		NC_026477.1:6458933-6458999:+	GCF_000240135.3_ASM24013v3_genomic	CM000577.1:6458934-6458998:+	GCA_000240135.3_ASM24013v3	gene, TE	UCUUCGGAGGCGUCUGUU	TRUE	AACGGCGCAGUGGCAGAGUGGUCUAAUGCGAUAGACUAGAAAUCUAUUCUCUUCGGAGGCGUCUGUU	((((((((..(.(.(((((((((((......)))))))..........)))).).)..))).)))))	-18	[1, 24, 31, 65]	64	1 no_coords	Fail/lacking	recovered		valid	2-pass	RF00005	2.82e-29	tRNA	tRNA	Y	none	Y	N	4
PID0187	Chen2015-xw	Fugra	Fg-milRNA-24		NC_026474.1:4909853-4909958:+	GCF_000240135.3_ASM24013v3_genomic	CM000574.1:4909855-4909956:+	GCA_000240135.3_ASM24013v3	gene, TE	AAAGCGAUUCAAUUCAUCUUUU	FALSE	GCAUAAAGCGAUUCAAUUCAUCUUUUUGACUUCUUUUUGGCCCUUUCCUACCAAGUUUCCAUGUUGGCUUUAAGAUAUAUAUGGAUGGAUGAUUGCUUGUUUUUGC	(((..((((((((..((((((((........((((...((((.......................))))..)))).......)))))))))))))))).....)))	-21.6	[2, 25, 79, 103]	101	1 no_coords	Fail/lacking	recovered		valid	2-pass					Y	none	Y	N	3
PID0188	Chen2015-xw	Fugra	Fg-milRNA-25		NC_026474.1:7499332-7499391:+	GCF_000240135.3_ASM24013v3_genomic	CM000574.1:7499335-7499387:+	GCA_000240135.3_ASM24013v3	gene, TE	GAUGAAGACUGAACCGUCGGGG	FALSE	UCUAUGAUGAAGACUGAACCGUCGGGGGAUUCGCCGGAUGGUAAUGCCUUCGUCAUCAGA	((((((((((((.(...((((((.((.(...).)).))))))...).))))))))).)))	-24.9	[3, 26, 32, 55]	52	1 no_coords	Fail/lacking	recovered		valid	1-fail					Y	PCG-CDS-exon	N	Not tested: not intergenic	4
PID0189	Chen2015-xw	Fugra	Fg-milRNA-26		NC_026474.1:6543387-6543486:-	GCF_000240135.3_ASM24013v3_genomic	CM000574.1:6543393-6543480:-	GCA_000240135.3_ASM24013v3	gene, TE	GGCAACGUGGCGGAGUGGUU	FALSE	CGUGGUGGCUUCCCACCGUCAUGUCGUGUCUGUAUAUCACCAAACUAGACUUCAAUUUUCAACAACAACAGAAAGGCAACGUGGCGGAGUGGUUAUCGCG	((((((((((.(...(((((((((.((.(((((..................................)))))...)).))))))))).).))))))))))	-28.17	[6, 29, 72, 93]	87	1 no_coords	Fail/lacking	recovered		valid	2-pass					Y	none	Y	N	3
PID0190	Chen2015-xw	Fugra	Fg-milRNA-27		NC_026476.1:3008104-3008300:-	GCF_000240135.3_ASM24013v3_genomic	CM000576.1:3008116-3008287:-	GCA_000240135.3_ASM24013v3	gene, TE	UUGGGAUGAAUGGGCGGACAAUA	FALSE	GGUAGGCGAACCUGGAUGUCCGACCAAGCUCGUCCCCGAUUUUGACCAAACUGGGCUUCCCAAGGGUAACGUCCGUCUUAGUAGAUUGACAACCCGGAAAUCACUGAGAUGGCCAUUCCCGGACAAGAUUGAUACCAACGAAUCGCAGAAUUAUCGAUAUUAUUGGGAUGAAUGGGCGGACAAUAUUCCCGUCUGCC	((((((((.....(((((((((.(((...(((((((((((((((.((....((((...)))).(((....(.((((((((((.((((..(.....)..)))))))))))))))....))))).))))))))..........((((.(......)))))......))))))).))).))))))....)))))))))))	-69.1	[13, 39, 160, 184]	171	1 no_coords	Fail/lacking	recovered		valid	1-fail					Y	PCG-CDS-exon	N	Not tested: not intergenic	4
PID0191	Chen2015-xw	Fugra	Fg-milRNA-28		NC_026477.1:3499582-3499728:+	GCF_000240135.3_ASM24013v3_genomic	CM000577.1:3499594-3499721:+	GCA_000240135.3_ASM24013v3	gene, TE	AUGGGUACGGGCGGGUUGCGGA	TRUE	CUUGACAGGCACAAAUGGGUACGGGCGGGUUGCGGAAGCCUGGGAUAAACCGGGAGUUUGGUGAGCCAAGGACUGCAACGGCUCCAAACACAACCACUCAAAUUGAUGGACUUAGCCCAAGCAUCCUGCCAGCUCCAGCCCAACGAG	((((...(((.....(((((...((((((.(((((...(((((......))))).((((((..((((............))))))))))....(((.(((...)))))).......))..))).)))))).)).))))))...))))	-46	[12, 36, 114, 139]	127	1 no_coords	Fail/lacking	recovered		valid	2-pass					Y	none	Y	Y	2
PID0192	Chen2015-xw	Fugra	Fg-milRNA-29		NC_026477.1:2652150-2652245:-	GCF_000240135.3_ASM24013v3_genomic	CM000577.1:2652150-2652245:-	GCA_000240135.3_ASM24013v3	gene, TE	AGGAGGCAGUAAUAAGACUU	TRUE	AUAGGAGGCAGUAAUAAGACUUGUAAAACUAGUACAUGAGUUGCGGCAUGUUAUUAGUCGUCCAUUAGGGCUGCACAGUUGGUUAGGCGCUCUUGU	(((((((((..((((..((((((((..(((((((((((........)))).))))))).((((....)))))))).)))).)))).)).)))))))	-26.5	[0, 22, 73, 95]	95	1 no_coords	Fail/lacking	recovered		valid	2-pass					Y	PCG-UTR-exon	N	Not tested: not intergenic	3
PID0193	Chen2015-xw	Fugra	Fg-milRNA-30		NC_026475.1:2609607-2609689:-	GCF_000240135.3_ASM24013v3_genomic	CM000575.1:2609607-2609689:-	GCA_000240135.3_ASM24013v3	gene, TE	ACGCGACUGGGAUAAGACGAC	TRUE	ACCACGAUUUUAUCCCGUCGUUCUCGGACUACUGCGCUGUGUAGUUACCGCCCAACGAACACGCGACUGGGAUAAGACGACAA	....((.((((((((((((((..(((((((((........)))))).........)))....))))).)))))))))))....	-24.8	[0, 23, 59, 82]	82	1 no_coords	Fail/lacking	recovered		valid	2-pass					Y	PCG-CDS-exon	N	Not tested: not intergenic	4
PID0194	Chen2015-xw	Fugra	Fg-milRNA-31		-	GCF_000240135.3_ASM24013v3_genomic	-	-	-	ACAUACGACCAUACCUACCAGA	-	-	-	-	-	-	1 no_coords	Fail/lacking	recovered		recovered no valid hairpins	-	-	-	-	-	-	not evaluated: hairpin invalid	-	-	-
PID0195	Chen2015-xw	Fugra	Fg-milRNA-32		NC_026474.1:9714345-9714400:+	GCF_000240135.3_ASM24013v3_genomic	CM000574.1:9714345-9714400:+	GCA_000240135.3_ASM24013v3	gene, TE	GAGGACACUGCAUCACGACUCU	TRUE	CUUGAGGACACUGCAUCACGACUCUGGUCUCGAGCCGUUGGUGCCAGCCCCUCAGA	.((((((...((((((((((.(((.......))).)).))))).)))..)))))).	-19.5	[0, 24, 30, 55]	55	1 no_coords	Fail/lacking	recovered		valid	2-pass					Y	PCG-CDS-exon	N	Not tested: not intergenic	4
PID0196	Chen2015-xw	Fugra	Fg-milRNA-33		NC_026474.1:10112532-10112660:-	GCF_000240135.3_ASM24013v3_genomic	CM000574.1:10112538-10112654:-	GCA_000240135.3_ASM24013v3	gene, TE	GAUAAGGAGUGGUCGAGCGGGAU	FALSE	UUCCUUUCGAUAAGGAGUGGUCGAGCGGGAUACGCUACCUAAAAAAAACCUUCAAGCUCUCAAACAAUCUCUACCUAAAAAAACCUAAUACCACAUUCUCCCUGUUCGACCGCUCCUUAUCUUUUGGAA	.(((....(((((((((((((((((((((.......................................................................)))))))))))))))))))))....))).	-39.48	[6, 30, 98, 122]	116	1 no_coords	Fail/lacking	recovered		valid	2-pass					Y	none	Y	N	3
PID0197	Chen2015-xw	Fugra	Fg-milRNA-34		NC_026475.1:6555925-6556164:+	GCF_000240135.3_ASM24013v3_genomic	CM000575.1:6555936-6556152:+	GCA_000240135.3_ASM24013v3	gene, TE	GCGGGUUUAGCUCAGUUGGGAGA	FALSE	ACCUCAUUGGCUAGCGGGUUUAGCUCAGUUGGGAGAGCGUCAGACUGAAGUCAAACUUCAAUCAUUACGAUAUCUGAAGGUCAUGUGUUCGAUCCACAUAAACCGCAGCAGUCUUUCUUUUUUUGUCUCACGUCUUGUCUUAUUUAAUCAAGCAAGUUUCAUUUUUUGUCCGUUUGCAUAUACACAUAUAUAGAACGCGGACCUCUUCUUUUGCUGGUAGACCUUCUUACUAUCUGCUGU	.......(((..((.(((((((.(.((((.((((((((((.((((((((((...))))))........(((..(((..(((.(((((.......)))))..))).)))..)))...........)))).))).((((.(((........)))))))...........((((((((..(((((....)))))..)).)))))))))))))...)))))))))))).))..)))........	-53.9	[11, 35, 203, 227]	216	1 no_coords	Fail/lacking	recovered		valid	2-pass	RF00005	6.87e-46	tRNA	tRNA	Y	none	Y	N	4
PID0198	Chen2015-xw	Fugra	Fg-milRNA-35		-	GCF_000240135.3_ASM24013v3_genomic	-	-	-	GGUGAGAUGGCCGAGUUGGU	-	-	-	-	-	-	1 no_coords	Fail/lacking	recovered		recovered no valid hairpins	-	-	-	-	-	-	not evaluated: hairpin invalid	-	-	-
PID0199	Chen2015-xw	Fugra	Fg-milRNA-36		NC_026474.1:4748817-4748882:-	GCF_000240135.3_ASM24013v3_genomic	CM000574.1:4748823-4748876:-	GCA_000240135.3_ASM24013v3	gene, TE	GUGGGAUCUGAUGCACGAGAUGG	FALSE	CCGUAACCUGCUCUGCAACAUGACCCACCGUGGUGCCGUGGGAUCUGAUGCACGAGAUGGUGAUGG	((((.(((..(((((((.((.(((((((.((...)).))))).)))).)))).)))..))).))))	-25.7	[6, 29, 35, 59]	53	1 no_coords	Fail/lacking	recovered		valid	1-fail					Y	PCG-CDS-exon	N	Not tested: not intergenic	4
PID0200	Chen2015-xw	Fugra	Fg-milRNA-37		NC_026474.1:6282557-6282609:-	GCF_000240135.3_ASM24013v3_genomic	CM000574.1:6282562-6282609:-	GCA_000240135.3_ASM24013v3	gene, TE	GACGAGACUGAGCGUAGGAA	FALSE	CUCCUACGUAGUCAGCCGUCUAGGUGUUGACGAGACUGAGCGUAGGAAACAAC	.((((((((..(((((((((........)))).).))))))))))))......	-22.2	[0, 21, 26, 47]	47	1 no_coords	Fail/lacking	recovered		valid	1-fail					Y	PCG-CDS-exon	N	Not tested: not intergenic	4
PID0201	Chen2015-xw	Fugra	Fg-milRNA-38		NC_026475.1:6857957-6858042:-	GCF_000240135.3_ASM24013v3_genomic	CM000575.1:6857960-6858038:-	GCA_000240135.3_ASM24013v3	gene, TE	ACGGAUCCCCUUGAGCGUAGG	TRUE	GUCAUUCCUCUCGAUGACUCUGCGCAAUAUCGAUUCACGGAUCUCAAGACGGAUCCCCUUGAGCGUAGGGCAGUUGAGAGGUGGAC	(((...(((((((((..((((((((....((((.....((((((......))))))..))))))))))))..)))))))))..)))	-36.1	[4, 26, 60, 82]	78	1 no_coords	Fail/lacking	recovered		valid	2-pass					Y	PCG-CDS-exon	N	Not tested: not intergenic	4
PID0202	Chen2015-xw	Fugra	Fg-milRNA-39		NC_026476.1:3147378-3147494:-	GCF_000240135.3_ASM24013v3_genomic	CM000576.1:3147410-3147470:-	GCA_000240135.3_ASM24013v3	gene, TE	GGGGAUGGGUAUGGGUCGGGGC	FALSE	UGGAUUGACUCGAGAGAUUCCAUCACCCCGGUCCAGAACCCGCUAACUUUUGGAGAAGACUAGGGGGAUGGGUAUGGGUCGGGGCCAUGUUGAAUUGGUAUAAAUCUUUCCUCCCCA	(((...((...((((((((((((((((((((((((..(((((....(((((((......)))))))..))))).))))))))))......)))..)))....)))))))).)).)))	-36.5	[24, 50, 61, 84]	60	1 no_coords	Fail/lacking	recovered		valid	1-fail					Y	none	Y	N	4
PID0203	Chen2015-xw	Fugra	Fg-milRNA-40		NC_026477.1:2000357-2000414:+	GCF_000240135.3_ASM24013v3_genomic	CM000577.1:2000361-2000410:+	GCA_000240135.3_ASM24013v3	gene, TE	UCUGGAAGACUGAGUGGAU	TRUE	GCCCUAUCUGGAAGACUGAGUGGAUGAUGAAGCUCAUGGUCGGUUUCCACGAUGAGGC	(((.((((((((.((((((....((((......))))..)))))))))).)))).)))	-20.2	[4, 25, 34, 53]	49	1 no_coords	Fail/lacking	recovered		valid	2-pass					Y	PCG-CDS-exon	N	Not tested: not intergenic	4
PID0204	Chen2015-xw	Fugra	Fg-milRNA-41		NC_026477.1:2228841-2228895:+	GCF_000240135.3_ASM24013v3_genomic	CM000577.1:2228842-2228894:+	GCA_000240135.3_ASM24013v3	gene, TE	CUGGAUCAUUGUAGACCAGGCUG	TRUE	CACCUGAUCGCAUUGUCCAGAUGUCAUUACUUCUGGAUCAUUGUAGACCAGGCUG	..((((.(((((.((((((((.((....)).)))))).)).))).)).))))...	-19.4	[1, 21, 30, 53]	52	1 no_coords	Fail/lacking	recovered		valid	2-pass					Y	near-PCG	N	Not tested: not intergenic	3
PID0205	Chen2015-xw	Fugra	Fg-milRNA-42		-	GCF_000240135.3_ASM24013v3_genomic	-	-	-	UGGGUACGGGCGGGUUGCGGA	-	-	-	-	-	-	1 no_coords	Fail/lacking	recovered		recovered no valid hairpins	-	-	-	-	-	-	not evaluated: hairpin invalid	-	-	-
PID0206	Chen2015-xw	Fugra	Fg-milRNA-43		NC_026477.1:5097278-5097352:-	GCF_000240135.3_ASM24013v3_genomic	CM000577.1:5097281-5097349:-	GCA_000240135.3_ASM24013v3	gene, TE	UCUGCGGCGAUGAAUAGACACU	FALSE	UGCUUUCUGCGGCGAUGAAUAGACACUCUUCAAUGUAUAGGUUUGAAAAGACUGUCUGUAGUCGCUAAGAGCGUA	(((.((((..((((((..(((((((.(((((((.........))))..))).))))))).)))))).)))).)))	-23.8	[3, 26, 50, 71]	68	1 no_coords	Fail/lacking	recovered		valid	1-fail					Y	PCG-UTR-exon	N	Not tested: not intergenic	4
PID0207	Chen2015-xw	Fugra	Fg-milRNA-44		NC_026474.1:9076386-9076437:+	GCF_000240135.3_ASM24013v3_genomic	CM000574.1:9076386-9076437:+	GCA_000240135.3_ASM24013v3	gene, TE	GCUGUCGAGCGUGUAUGGGGUG	FALSE	AGGCUGUCGAGCGUGUAUGGGGUGUUGAGCCCGAUUACACUCGUGAGGGCGG	..(((.(((.(.((((((.((((.....)))).).))))).).))).)))..	-22.6	[0, 23, 27, 51]	51	1 no_coords	Fail/lacking	recovered		valid	2-pass					Y	PCG-CDS-exon	N	Not tested: not intergenic	4
PID0208	Chen2015-xw	Fugra	Fg-milRNA-45		-	GCF_000240135.3_ASM24013v3_genomic	-	-	-	UGAUGUUUCAGAGGGCCGAGUUA	-	-	-	-	-	-	1 no_coords	Fail/lacking	recovered		recovered no valid hairpins	-	-	-	-	-	-	not evaluated: hairpin invalid	-	-	-
PID0209	Chen2015-xw	Fugra	Fg-milRNA-46		NC_026476.1:6563962-6564031:-	GCF_000240135.3_ASM24013v3_genomic	CM000576.1:6563972-6564031:-	GCA_000240135.3_ASM24013v3	gene, TE	AGGACGUCUCGGAGCAGCAGA	FALSE	UAAGGACGUCUCGGAGCAGCAGAUUAAGGUAUGUUUCCGCUGUGGCUCUUGAGGCCCUCGGACUUUGUUC	..(((..((((((((((.((((...(((.....)))...)))).)))).)))))))))............	-19.4	[0, 22, 38, 59]	59	1 no_coords	Fail/lacking	recovered		valid	1-fail					Y	PCG-CDS-exon	N	Not tested: not intergenic	4
PID0210	Chen2015-xw	Fugra	Fg-milRNA-47		NC_026474.1:5788572-5788670:+	GCF_000240135.3_ASM24013v3_genomic	CM000574.1:5788573-5788669:+	GCA_000240135.3_ASM24013v3	gene, TE	AAGACUCAUAGAAAUUAGGGCA	FALSE	AUCAAGACUCAUAGAAAUUAGGGCAUGAACGCAAGCUUAAUCUUUUGUAUUGUGCGAGGUUAAGGUUGCGUUUAUGCCCUAAUUUCUAUGACUCUCGAU	(((.(((.((((((((((((((((((((((((((.(((((((((..(((...)))))))))))).)))))))))))))))))))))))))).))).)))	-57.6	[1, 24, 74, 97]	96	1 no_coords	Fail/lacking	recovered		valid	2-pass					Y	PCG-intron	N	Not tested: not intergenic	3
PID0211	Chen2015-xw	Fugra	Fg-milRNA-48		-	GCF_000240135.3_ASM24013v3_genomic	-	-	-	CGGGAAUUCGGGAAUUAGGGGGA	-	-	-	-	-	-	1 no_coords	Fail/lacking	recovered		recovered no valid hairpins	-	-	-	-	-	-	not evaluated: hairpin invalid	-	-	-
PID0212	Chen2015-xw	Fugra	Fg-milRNA-49		NC_026474.1:10769899-10770459:+	GCF_000240135.3_ASM24013v3_genomic	CM000574.1:10769905-10770453:+	GCA_000240135.3_ASM24013v3	gene, TE	GGCAACGUGACGGAGUGGUUA	FALSE	AUCAUCUAGGCAACGUGACGGAGUGGUUAACGUGAUCGCCUCGAAAUCUAAACCGUAAGCGAUUUCCUUCGGGAGCGCAGGUUCGAAUCCUGCCGUUGUCGAUUCACUUUUUUUGUGUGUGUCUCUGGUGAGAAAUGUUGGUGUUGGGGGCUGGGGACGUAUCUUUUUGUACUGAGGGGUUUGACGUAGUUGCUUUGGAGGGACUGGACGCCCGUGGAACAGCUAGGUUCGUCUGGGGGCGAUCUUUGGCGUAAAGUGGUGAUGGCUUCGUUUUUCGACCAUGGCACUUUUCGGCUCGGUUUUUGCUGCUUUUGCACAUUUUUUCACACGCACGCUCUUGUUUGGACUUCUCUUUUAACAUAUGUGCUGUUUGGGAAGUCAUCGGAAGCGUGGACUGAU…	(((((..(((((((.(((.((((((((..(((((((((((((((((((............))))))..((((.((((((((.......)))).)))).))))..(((.......)))...(((((((((....(((......)))....)))))))))..(((((((......)))))))..(((.((((((.(((.(.(((........))).).))))))))).)))......)))))))))....))))..(((((((.(((((((((..((((((.((((.(((...((((((((((..((.(((....)))))............((((((.(((....((((((((.....((....)).......))))))))..))).)))))))))))).…	-172.3	[6, 28, 532, 554]	548	1 no_coords	Fail/lacking	recovered		valid	2-pass	RF00005	2.44e-45	tRNA	tRNA	Y	none	Y	N	4
PID0213	Dahlmann2015-ew	Pechr	milR-1		CM002798.1:11548223-11548283:+	GCA_000710275.1_ASM71027v1_genomic	CM002798.1:11548223-11548283:+	GCA_000710275.1_ASM71027v1	gene, TE	UUGGUACGAUCGAUUGGAGA	FALSE	CCCAGUCGGUGGUAUCAUGUCGUGGGUGUUAAGGGUCGGGAUUGGUACGAUCGAUUGGAGA	.(((((((((.((((((.(((.(((.(......).))).))))))))).)))))))))...	-27.8	[0, 20, 39, 60]	60	5 success	Coordinates	published		valid	3-pass_rep					Y	PCG-CDS-exon	N	Not tested: not intergenic	4
PID0214	Dahlmann2015-ew	Pechr	milR-2		CM002800.1:2410668-2410742:+	GCA_000710275.1_ASM71027v1_genomic	CM002800.1:2410668-2410742:+	GCA_000710275.1_ASM71027v1	gene, TE	UGAGAACGCUGAUAUAUAUAU	FALSE	GUAUAAUUUUGUUGAAGUCUUACUUAUAUUUCGUGGUUAAAGACGAAGAGCAUGUGAGAACGCUGAUAUAUAUAU	(((((..((.((.....((((((.....((((((........)))))).....))))))..)).))..)))))..	-12.1	[0, 23, 52, 74]	74	5 success	Coordinates	published		valid	3-pass_rep					Y	PCG-UTR-exon	N	Not tested: not intergenic	2
PID0215	Dahlmann2015-ew	Pechr	milR-3		CM002798.1:13214806-13214889:+	GCA_000710275.1_ASM71027v1_genomic	CM002798.1:13214806-13214888:+	GCA_000710275.1_ASM71027v1	gene, TE	UAGAAGAUCAUGCAGCAUGUA	FALSE	UAGAAGAUCAUGCAGCAUGUAAUGCGACCGAAGGGAUGUGUCAACUCUCUGGGGCUCGGCAUCGAUAUGCGGGCCUUCUUGUUC	.(((((.....((.((((((.((((((((..(((((.((....)))))))..)).)).))))..))))))..))))))).....	-25.3	[0, 20, 63, 82]	82	5 success	Coordinates	published		valid	3-pass_rep					Y	PCG-UTR-exon	N	Not tested: not intergenic	2
PID0216	Dahlmann2015-ew	Pechr	milR-4		CM002800.1:3988218-3988278:+	GCA_000710275.1_ASM71027v1_genomic	CM002800.1:3988218-3988277:+	GCA_000710275.1_ASM71027v1	gene, TE	UGCGACACAAGAACAAUCGGACGAU	FALSE	UGCGACACAAGAACAAUCGGACGAUUCGAUUCUUCAAUUCUACGACCAUUCUUUCGCUAUC	.((((...(((((...(((...((((.((....))))))...)))...)))))))))....	-10.8	[0, 24, 36, 59]	59	5 success	Coordinates	published		valid	1-fail					Y	PCG-CDS-exon	N	Not tested: not intergenic	4
PID0217	Dahlmann2015-ew	Pechr	milR-5		CM002801.1:37091-37159:-	GCA_000710275.1_ASM71027v1_genomic	CM002801.1:37092-37159:-	GCA_000710275.1_ASM71027v1	gene, TE	UGACAUAGGAACGACGAGAC	TRUE	UGACAUAGGAACGACGAGACUUCAUGCUUCCAAAAUCCAAAAUGGAGUUUUGGUUGAUCAAUGGCAAUU	((.(((..((.((((((((((((((................)))))))))).)))).)).))).))...	-14.9	[0, 18, 47, 67]	67	5 success	Coordinates	published		valid	2-pass					Y	PCG-CDS-exon	N	Not tested: not intergenic	4
PID0218	Dahlmann2015-ew	Pechr	milR-6		CM002798.1:11697045-11697111:+	GCA_000710275.1_ASM71027v1_genomic	CM002798.1:11697045-11697111:+	GCA_000710275.1_ASM71027v1	gene, TE	UCGGGCCCGUAGCUGUGAUGC	FALSE	UAUUUCAGCAACUCGGUUGCCUGGUGCCUGAUAGUAAGCUGUUGCAUCGGGCCCGUAGCUGUGAUGC	((((.((((....(((..(((((((((..(((((....)))))))))))))))))..)))).)))).	-27.2	[0, 25, 44, 66]	66	5 success	Coordinates	published		valid	1-fail					Y	PCG-CDS-exon	N	Not tested: not intergenic	4
PID0219	Dahlmann2015-ew	Pechr	milR-7	a	CM002798.1:11697681-11697758:-	GCA_000710275.1_ASM71027v1_genomic	CM002799.1:4407095-4407171:-	GCA_000710275.1_ASM71027v1	gene, TE	UAGGUUCAGGAAGUUCUCUCC	FALSE	UAGGUUCAGGAAGUUCUCUCCAUCCGAGCGUUCCACAAUCGGAAAGCUGGUUAACAGGAUCUGUGUCUUCAACCGUCA	..((((.((((((.(((......((.(((.((((......)))).)))))......))).))...)))).))))....	-18.4	[0, 20, 52, 76]	76	5 success	Coordinates	published		valid	1-fail					Y	none	Y	N	4
PID0220	Dahlmann2015-ew	Pechr	milR-7	b	CM002798.1:12068486-12068563:-	GCA_000710275.1_ASM71027v1_genomic	CM002799.1:4407095-4407171:-	GCA_000710275.1_ASM71027v1	gene, TE	UAGGUUCAGGAAGUUCUCUCC	FALSE	UAGGUUCAGGAAGUUCUCUCCAUCCGAGCGUUCCACAAUCGGAAAGCUGGUUAACAGGAUCUGUGUCUUCAACCGUCA	..((((.((((((.(((......((.(((.((((......)))).)))))......))).))...)))).))))....	-18.4	[0, 20, 52, 76]	76	5 success	Coordinates	published		valid	1-fail					Y	none	Y	N	4
PID0221	Dahlmann2015-ew	Pechr	milR-7	c	CM002799.1:4407094-4407171:-	GCA_000710275.1_ASM71027v1_genomic	CM002799.1:4407095-4407171:-	GCA_000710275.1_ASM71027v1	gene, TE	UAGGUUCAGGAAGUUCUCUCC	FALSE	UAGGUUCAGGAAGUUCUCUCCAUCCGAGCGUUCCACAAUCGGAAAGCUGGUUAACAGGAUCUGUGUCUUCAACCGUCA	..((((.((((((.(((......((.(((.((((......)))).)))))......))).))...)))).))))....	-18.4	[0, 20, 52, 76]	76	5 success	Coordinates	published		valid	1-fail					Y	none	Y	N	4
PID0222	Dahlmann2015-ew	Pechr	milR-8		CM002799.1:4498587-4498671:+	GCA_000710275.1_ASM71027v1_genomic	CM002799.1:4498587-4498671:+	GCA_000710275.1_ASM71027v1	gene, TE	UGGCUACGGAUAUGACUCUC	FALSE	AGGGAGUGUCCGCUGGCGAGCCAACCGCAUAGUGGCAACAGGGAGACGGUUCCACGGAUGGGGAGUGGCUACGGAUAUGACUCUC	((((.(((((((.((((..((...((.(((.((((.(((.(.....).)))))))..))).)).)).)))))))))))..)))).	-31.6	[0, 21, 63, 84]	84	5 success	Coordinates	published		valid	1-fail					Y	PCG-CDS-exon	N	Not tested: not intergenic	4
PID0223	Dahlmann2015-ew	Pechr	milR-9		CM002799.1:6202677-6202728:-	GCA_000710275.1_ASM71027v1_genomic	CM002799.1:6202677-6202728:-	GCA_000710275.1_ASM71027v1	gene, TE	GGCCCCAGAGAUCGUUGGUCUAA	FALSE	UGACCGACCGAAAUCUGACCAUCCUCAGUGGCCCCAGAGAUCGUUGGUCUAA	.(((((((.((..((((.((((.....))))...))))..)))))))))...	-19.1	[0, 21, 27, 51]	51	5 success	Coordinates	published		valid	3-pass_rep					Y	none	Y	N	2
PID0224	Dahlmann2015-ew	Pechr	milR-10		CM002800.1:877512-877577:-	GCA_000710275.1_ASM71027v1_genomic	CM002800.1:877512-877577:-	GCA_000710275.1_ASM71027v1	gene, TE	UAGCCAUCUCGUCGAGGUAGA	FALSE	UACUAGAGGUUGUUGCUAGCAUCUGGAAUUCAUCCCAGAGAAAUAUAGCCAUCUCGUCGAGGUAGA	((((.((.(..((.((((...(((((........)))))......)))).))..).))..))))..	-16	[0, 19, 43, 65]	65	5 success	Coordinates	published		valid	3-pass_rep					Y	TE	N	Not tested: not intergenic	4
PID0225	Dahlmann2015-ew	Pechr	milR-11		CM002798.1:12126475-12126539:+	GCA_000710275.1_ASM71027v1_genomic	CM002798.1:12126475-12126538:+	GCA_000710275.1_ASM71027v1	gene, TE	UAUGUCUGCUCUGGUCCAUGAC	FALSE	UAUGUCUGCUCUGGUCCAUGACUCGCCUGACCGAGCAGUCACGGCCAUCGAGCCUCUGACAGGAA	..((((.(((((((.((.(((((.((........))))))).)))))..))))....))))....	-20.9	[0, 21, 37, 63]	63	5 success	Coordinates	published		valid	1-fail					Y	TE	N	Not tested: not intergenic	4
PID0226	Dahlmann2015-ew	Pechr	milR-12		CM002801.1:2408756-2408823:+	GCA_000710275.1_ASM71027v1_genomic	CM002801.1:2408756-2408823:+	GCA_000710275.1_ASM71027v1	gene, TE	UCCAGGCUGACGGUGGCGCA	FALSE	UGGCGAUCUCUGCCUUCCGUCUUCUCAUCUCCCGCUGACGAUGAGACGUCCAGGCUGACGGUGGCGCA	..((.(((((.((((..((((((.((.((.......)).)).))))))...)))).)).))).))...	-23.3	[0, 18, 46, 67]	67	5 success	Coordinates	published		valid	1-fail					Y	PCG-UTR-exon	N	Not tested: not intergenic	4
PID0227	Dahlmann2015-ew	Pechr	milR-13		CM002798.1:8239273-8239341:+	GCA_000710275.1_ASM71027v1_genomic	CM002798.1:8239273-8239340:+	GCA_000710275.1_ASM71027v1	gene, TE	UAGGACUUGAUCGCGUGAGAC	FALSE	UAGGACUUGAUCGCGUGAGACAGACCAUGGCCCAUCGAGUCGAGAUCUCGCCGCGUUUCUUCACUAAGG	(((((...((.((((((((((.(((((((...))).).)))..).))))).))))..)).)).)))...	-15.5	[0, 20, 43, 67]	67	5 success	Coordinates	published		valid	1-fail					Y	PCG-CDS-exon	N	Not tested: not intergenic	4
PID0228	Dahlmann2015-ew	Pechr	milR-14		-	GCA_000710275.1_ASM71027v1_genomic	-	-	-	UAGAAUGCAAGCGCGUUGAGC	-	-	-	-	-	-	5 success	Coordinates	published		secondary structure in duplex	-	-	-	-	-	-	not evaluated: hairpin invalid	-	-	-
PID0229	Dahlmann2015-ew	Pechr	milR-15		-	GCA_000710275.1_ASM71027v1_genomic	-	-	-	UUCGAUUGGGAUCUGGGCCU	-	-	-	-	-	-	5 success	Coordinates	published		secondary structure in duplex, >20 mismatches in duplex	-	-	-	-	-	-	not evaluated: hairpin invalid	-	-	-
PID0230	Dahlmann2015-ew	Pechr	milR-16		CM002798.1:9237687-9237761:-	GCA_000710275.1_ASM71027v1_genomic	CM002798.1:9237687-9237761:-	GCA_000710275.1_ASM71027v1	gene, TE	UGGGCGGGCGAGAUUGAAC	FALSE	UUUCCAUCGGACUGGUGUUGAGCGCGCAGAAGUUGAAGCCUAUUAGCUGGCGCGAAUGGGCGGGCGAGAUUGAAC	.(((.(((...((.((.(....(((((...((((((......)))))).)))))...).)).))...))).))).	-20.5	[0, 20, 54, 74]	74	5 success	Coordinates	published		valid	2-pass					Y	PCG-CDS-exon	N	Not tested: not intergenic	4
PID0231	Dahlmann2015-ew	Pechr	milR-17		CM002799.1:5605185-5605257:-	GCA_000710275.1_ASM71027v1_genomic	CM002799.1:5605186-5605257:-	GCA_000710275.1_ASM71027v1	gene, TE	UCCAUCGUGGCUGUGCACUU	FALSE	UCCAUCGUGGCUGUGCACUUACCGCCCCAGCCCAUUACGAGCAUAUGGCGAAUCUGUCCAGCACCAUGUAGAA	..(((.(((.(((.(((.....((((...((.(.....).))....))))....))).)))))).))).....	-16.1	[0, 19, 51, 71]	71	5 success	Coordinates	published		valid	1-fail					Y	PCG-CDS-exon	N	Not tested: not intergenic	4
PID0232	Dahlmann2015-ew	Pechr	milR-18		-	GCA_000710275.1_ASM71027v1_genomic	-	-	-	UGGACGAGGAACAUCUGCAC	-	-	-	-	-	-	5 success	Coordinates	published		secondary structure in duplex	-	-	-	-	-	-	not evaluated: hairpin invalid	-	-	-
PID0233	Dahlmann2015-ew	Pechr	milR-19		CM002801.1:979955-980021:+	GCA_000710275.1_ASM71027v1_genomic	CM002801.1:979955-980021:+	GCA_000710275.1_ASM71027v1	gene, TE	CGGACGAGAAUGCCGAGGCUCUGUU	FALSE	GGCCCCAGUUAUUCCUCUUUUAAACGAACCAGGUUCCCUAUUCGGACGAGAAUGCCGAGGCUCUGUU	((((.(.((.((((((((.......((((...)))).......))).).)))))).).)))).....	-10.5	[0, 20, 40, 66]	66	5 success	Coordinates	published		valid	3-pass_rep					Y	PCG-UTR-exon	N	Not tested: not intergenic	2
PID0234	Dahlmann2015-ew	Pechr	milR-20		CM002798.1:8009736-8009780:+	GCA_000710275.1_ASM71027v1_genomic	CM002798.1:8009736-8009779:+	GCA_000710275.1_ASM71027v1	gene, TE	UCCUACGUUACUCCAAAGGAU	FALSE	UCCUACGUUACUCCAAAGGAUACCCUCUGGAGCAACGUAGGACAU	(((((((((.(((((.(((....))).))))).)))))))))...	-24.9	[0, 20, 21, 43]	43	5 success	Coordinates	published		valid	3-pass_rep					Y	none	Y	N	2
PID0235	Dahlmann2015-ew	Pechr	milR-21		CM002798.1:7174825-7174898:+	GCA_000710275.1_ASM71027v1_genomic	CM002798.1:7174825-7174898:+	GCA_000710275.1_ASM71027v1	gene, TE	UCUAGUCUGCCUCU	TRUE	AGGCAGAUUAGACCUUGACGGGGGGGACACAUUUGGUACCUUGUGUCCCCCUCGAGAAGAUCUAGUCUGCCUCU	((((((((((((.(((..(((((((((((((..........)))))))))))))..))).))))))))))))..	-48.9	[0, 28, 43, 73]	73	5 success	Coordinates	published		valid	3-pass_rep					Y	none	Y	N	2
PID0236	Dahlmann2015-ew	Pechr	milR-22		CM002800.1:1228283-1228364:+	GCA_000710275.1_ASM71027v1_genomic	CM002800.1:1228283-1228363:+	GCA_000710275.1_ASM71027v1	gene, TE	UUUGGAUGAAAUUCGAAUGAA	FALSE	UUUGGAUGAAAUUCGAAUGAAAUUCGAAUGGGUCUGGUGUUGACUCGAUGGGUUUUCUCGACUUUCUUUGAUCAUCUUCAUA	...((((((...(((((.((((.((((.((((((.......))))))..........)))).))))))))))))))).....	-18.4	[0, 20, 63, 80]	80	5 success	Coordinates	published		valid	1-fail					Y	none	Y	N	4
PID0237	Dahlmann2015-ew	Pechr	milR-23		CM002799.1:8010371-8010446:+	GCA_000710275.1_ASM71027v1_genomic	CM002799.1:8010371-8010446:+	GCA_000710275.1_ASM71027v1	gene, TE	UAGACUGUUCCAAGGAUGCU	FALSE	CACCUUCGAAUAGUGCUUGAUUCUCAAAGACGGUGGUCUCAACUGUCAAGGAUAUCUAGACUGUUCCAAGGAUGCU	..((((.(((((((.((.(((..((...((((((.......))))))...)).))).))))))))).)))).....	-23.2	[0, 19, 54, 75]	75	5 success	Coordinates	published		valid	3-pass_rep					Y	PCG-UTR-exon	N	Not tested: not intergenic	2
PID0238	Dahlmann2015-ew	Pechr	milR-24		CM002798.1:12845073-12845153:+	GCA_000710275.1_ASM71027v1_genomic	CM002798.1:12845073-12845153:+	GCA_000710275.1_ASM71027v1	gene, TE	UGCACAAGUGGACUCUCCCU	FALSE	CCAGACAGAGCUUGUGCGCGUCCACGGUACCAGCGUAAAAUGUCAGCAAAGCAUCCGCGGAUGCACAAGUGGACUCUCCCU	..(((....((((((((..((((.(((.....((...........)).......))).))))))))))))....)))....	-22.9	[0, 21, 59, 80]	80	5 success	Coordinates	published		valid	1-fail					Y	none	Y	N	4
PID0239	Dahlmann2015-ew	Pechr	milR-25		CM002799.1:3651114-3651202:-	GCA_000710275.1_ASM71027v1_genomic	CM002799.1:3651115-3651202:-	GCA_000710275.1_ASM71027v1	gene, TE	UCAUCGGCAAAACUUGGAGAA	FALSE	UCAUCGGCAAAACUUGGAGAAGCGACGUCAUCGCCACCAUCUAUGUUUUGUGGUUGCAAGAUGUUCUCGAAGUUGAAGGGCUCCUGACC	(((..(((..(((((.((((....(((((...((.(((((.........))))).))..))))))))).))))).....)))..)))..	-24	[0, 20, 63, 87]	87	5 success	Coordinates	published		valid	1-fail					Y	PCG-CDS-exon	N	Not tested: not intergenic	4
PID0240	Dahlmann2015-ew	Pechr	milR-26		-	GCA_000710275.1_ASM71027v1_genomic	-	-	-	UCACACGUAGAAAUCCAGAU	-	-	-	-	-	-	5 success	Coordinates	published		secondary structure in duplex, >20 mismatches in duplex	-	-	-	-	-	-	not evaluated: hairpin invalid	-	-	-
PID0241	Dahlmann2015-ew	Pechr	milR-27		CM002798.1:4059417-4059459:+	GCA_000710275.1_ASM71027v1_genomic	CM002798.1:4059417-4059459:+	GCA_000710275.1_ASM71027v1	gene, TE	UCUACCGAGACUGUCUUUGA	FALSE	GGAGUCAGCCUCGGAGCUUUGGAUCUACCGAGACUGUCUUUGA	((((.(((.(((((((........)).))))).))).))))..	-14.3	[0, 18, 21, 42]	42	5 success	Coordinates	published		valid	3-pass_rep					Y	none	Y	N	2
PID0242	Dahlmann2015-ew	Pechr	milR-28		CM002799.1:8593139-8593200:+	GCA_000710275.1_ASM71027v1_genomic	CM002799.1:8593139-8593200:+	GCA_000710275.1_ASM71027v1	gene, TE	UUAGCAUGCAUGGUAUUGUA	FALSE	CCACCAUCGCAUCAGGGCUCCAAGAUUGUUUCUAGAAACCAGUUAGCAUGCAUGGUAUUGUA	..(((((.(((((.((..((..(((.....))).))..)).).....)))))))))......	-11.2	[0, 13, 40, 61]	61	5 success	Coordinates	published		valid	1-fail					Y	none	Y	N	4
PID0243	Dahlmann2015-ew	Pechr	milR-29		-	GCA_000710275.1_ASM71027v1_genomic	-	-	-	UGCUUGGUCGUCACUCGGGA	-	-	-	-	-	-	5 success	Coordinates	published		secondary structure in duplex, >20 mismatches in duplex	-	-	-	-	-	-	not evaluated: hairpin invalid	-	-	-
PID0244	Dahlmann2015-ew	Pechr	milR-30		CM002801.1:190879-190926:+	GCA_000710275.1_ASM71027v1_genomic	CM002801.1:190879-190926:+	GCA_000710275.1_ASM71027v1	gene, TE	UACCAAGUCGUCGAAAUGCU	FALSE	UACAAUCGCCACCUGUCCCAAAGAGGGAUACCAAGUCGUCGAAAUGCU	.....((((.((.((((((.....))))))....)).).)))......	-8.4	[0, 16, 26, 47]	47	5 success	Coordinates	published		valid	2-pass					Y	none	Y	N	3
PID0245	Dahlmann2015-ew	Pechr	milR-31		CM002798.1:3765153-3765197:+	GCA_000710275.1_ASM71027v1_genomic	CM002798.1:3765153-3765197:+	GCA_000710275.1_ASM71027v1	gene, TE	UGAGACCGCGGAGCAAACG	FALSE	UUUGCGCAAAAGGUUGGAGGUUCAACUGAGACCGCGGAGCAAACG	(((((.(....((((..((......))..))))...).)))))..	-11.3	[0, 19, 24, 44]	44	5 success	Coordinates	published		valid	2-pass					Y	PCG-UTR-exon	N	Not tested: not intergenic	3
PID0246	Dahlmann2015-ew	Pechr	milR-32		CM002800.1:719002-719055:-	GCA_000710275.1_ASM71027v1_genomic	CM002800.1:719003-719055:-	GCA_000710275.1_ASM71027v1	gene, TE	UGGAGAAUGUCACUUGUGGAA	FALSE	UGGAGAAUGUCACUUGUGGAAUGUAUGCCUUGAUCUUCAGGUGCCUCUUCACUU	((((((..(.((((((.(((.............))).))))))).))))))...	-12.4	[0, 20, 32, 52]	52	5 success	Coordinates	published		valid	1-fail					Y	none	Y	N	4
PID0247	Dahlmann2015-ew	Pechr	milR-33		CM002801.1:1820276-1820326:-	GCA_000710275.1_ASM71027v1_genomic	CM002801.1:1820277-1820326:-	GCA_000710275.1_ASM71027v1	gene, TE	AUGCCCUUCGGCGUUAGUCUACC	FALSE	AUGCCCUUCGGCGUUAGUCUACCUGGAAUUAGCUAACGCCCAAGGGCAUUA	((((((((.((((((((.(((........))))))))))).))))))))..	-27.9	[0, 22, 27, 49]	49	5 success	Coordinates	published		valid	2-pass					Y	none	Y	N	3
PID0248	Dahlmann2015-ew	Pechr	milR-34		CM002801.1:1325461-1325507:-	GCA_000710275.1_ASM71027v1_genomic	CM002801.1:1325461-1325507:-	GCA_000710275.1_ASM71027v1	gene, TE	UUUCCCAUCUCGAUCACCGGA	FALSE	GUCAGAUCAGAUCCCGGCAGAUUAACUUUCCCAUCUCGAUCACCGGA	....((((((((...((.(((.....))))).)))).))))......	-6.7	[0, 22, 24, 46]	46	5 success	Coordinates	published		valid	1-fail					Y	none	Y	N	4
PID0249	Lin2015-zy	Tacam	aci-milR-1		JNBV01000001.1:757904-758047:-	GCA_000766995.1_ASM76699v1_genomic	JAHFZK010000005.1:389730-389853:-	GCA_022598595.1_ASM2259859v1	gene	UACCCGACUGGAGGACGAGA	TRUE	ACAGUUGCGUAAAUACCCGACUGGAGGACGAGAUUACUUUGGCGCACUACUGCUUCUCAAAACCUGUGCCGGGUUGCUUAUCAGUAACAUCAACUAGUAUCACUGCUUUCACCAUGCUAUUGGACCCAGUGUAUUUACCACGGU	.....((.((((((((...(((((.(..(((.......((((((((..................))))))))((((((....))))))......((((((.............)))))))))..))))))))))))))))....	-31.5	[11, 34, 115, 134]	123	1 no_coords	Fail/lacking	recovered		valid	2-pass					Y	PCG-CDS-exon	Not tested: lacking an annotation	Not tested: not intergenic	4
PID0250	Lin2015-zy	Tacam	aci-milR-2a-1		JNBV01000005.1:1352761-1352871:+	GCA_000766995.1_ASM76699v1_genomic	JAHFZK010000026.1:224971-225075:+	GCA_022598595.1_ASM2259859v1	gene	CUGCGAUGGAUGACUGCGACGA	TRUE	GGUAUCGUUGUUGUCAGUUGUACAUCGCACUAGCGUGGUUGGACAGACUUGCGCGAGUUCGCGCAAGCUGGAUGCCAUGCUACUGCGAUGGAUGACUGCGACGACGAUCUC	((.((((((((((.(((((((.(((((((.(((((((((....(((.((((((((....)))))))))))...))))))))).))))))).))))))))))))))))))).	-66.9	[3, 31, 80, 107]	104	1 no_coords	Fail/lacking	recovered		valid	3-pass_rep					Y	PCG-UTR-exon	Not tested: lacking an annotation	Not tested: not intergenic	3
PID0251	Lin2015-zy	Tacam	aci-milR-2a-3		-	GCA_000766995.1_ASM76699v1_genomic	-	-	-	CCGCGAUGGAUGACUGCGACGA	-	-	-	-	-	-	1 no_coords	Fail/lacking	recovered		recovered no valid hairpins	-	-	-	-	-	-	not evaluated: hairpin invalid	-	-	-
PID0252	Lin2015-zy	Tacam	aci-milR-2a-4		-	GCA_000766995.1_ASM76699v1_genomic	-	-	-	CUGCGGUGGAUGACUGCGACGA	-	-	-	-	-	-	1 no_coords	Fail/lacking	recovered		recovered no valid hairpins	-	-	-	-	-	-	not evaluated: hairpin invalid	-	-	-
PID0253	Lin2015-zy	Tacam	aci-milR-2a-10		-	GCA_000766995.1_ASM76699v1_genomic	-	-	-	CUGCGAUAGAUGACUGCGACGACG	-	-	-	-	-	-	1 no_coords	Fail/lacking	recovered		recovered no valid hairpins	-	-	-	-	-	-	not evaluated: hairpin invalid	-	-	-
PID0254	Lin2015-zy	Tacam	aci-milR-2a-13		-	GCA_000766995.1_ASM76699v1_genomic	-	-	-	CUGCGAUGGAUGACUGCGACGACGC	-	-	-	-	-	-	1 no_coords	Fail/lacking	recovered		recovered no valid hairpins	-	-	-	-	-	-	not evaluated: hairpin invalid	-	-	-
PID0255	Lin2015-zy	Tacam	aci-milR-2a-15		-	GCA_000766995.1_ASM76699v1_genomic	-	-	-	CGUUGUUGUCAGUUGUACAUCGCACU	-	-	-	-	-	-	1 no_coords	Fail/lacking	recovered		recovered no valid hairpins	-	-	-	-	-	-	not evaluated: hairpin invalid	-	-	-
PID0256	Lin2015-zy	Tacam	aci-milR-2b-2		-	GCA_000766995.1_ASM76699v1_genomic	-	-	-	UCGUUGUUGUCAGUUGUACAUCG	-	-	-	-	-	-	1 no_coords	Fail/lacking	recovered		recovered no valid hairpins	-	-	-	-	-	-	not evaluated: hairpin invalid	-	-	-
PID0257	Lin2015-zy	Tacam	aci-milR-2b-3		-	GCA_000766995.1_ASM76699v1_genomic	-	-	-	UCGUUGUUGUCAGUUGUACAUCGCA	-	-	-	-	-	-	1 no_coords	Fail/lacking	recovered		recovered no valid hairpins	-	-	-	-	-	-	not evaluated: hairpin invalid	-	-	-
PID0258	Lin2015-zy	Tacam	aci-milR-2b-4		-	GCA_000766995.1_ASM76699v1_genomic	-	-	-	UCGUUGUUGUCAGUUGUACAUCGCAC	-	-	-	-	-	-	1 no_coords	Fail/lacking	recovered		recovered no valid hairpins	-	-	-	-	-	-	not evaluated: hairpin invalid	-	-	-
PID0259	Lin2015-zy	Tacam	aci-milR-2b-6		-	GCA_000766995.1_ASM76699v1_genomic	-	-	-	GUUGUUGUCAGUUGUACAUCGCACU	-	-	-	-	-	-	1 no_coords	Fail/lacking	recovered		recovered no valid hairpins	-	-	-	-	-	-	not evaluated: hairpin invalid	-	-	-
PID0260	Lin2015-zy	Tacam	aci-milR-2b-7		-	GCA_000766995.1_ASM76699v1_genomic	-	-	-	CGUUGUUGUCAGUUGUACAUCGCACU	-	-	-	-	-	-	1 no_coords	Fail/lacking	recovered		recovered no valid hairpins	-	-	-	-	-	-	not evaluated: hairpin invalid	-	-	-
PID0261	Lin2015-zy	Tacam	aci-milR-2b-8		-	GCA_000766995.1_ASM76699v1_genomic	-	-	-	GUUGUUGUCAGUUGUACAUCGCACUA	-	-	-	-	-	-	1 no_coords	Fail/lacking	recovered		recovered no valid hairpins	-	-	-	-	-	-	not evaluated: hairpin invalid	-	-	-
PID0262	Lin2015-zy	Tacam	aci-milR-3a-1		JNBV01000017.1:368134-368184:-	GCA_000766995.1_ASM76699v1_genomic	JAHFZK010000009.1:1101398-1101444:+	GCA_022598595.1_ASM2259859v1	gene	CGGUCCUGGACGUCCGUUUACGCA	TRUE	UUCCGGUCCUGGACGUCCGUUUACGCAGCGAAACGGACGUCAGGACCAGAA	.((.(((((((.((((((((((.((...))))))))))))))))))).)).	-30.9	[2, 25, 27, 48]	46	1 no_coords	Fail/lacking	recovered		valid	3-pass_rep					Y	PCG-UTR-exon	Not tested: lacking an annotation	Not tested: not intergenic	3
PID0263	Lin2015-zy	Tacam	aci-milR-3a-2		-	GCA_000766995.1_ASM76699v1_genomic	-	-	-	GCGAAACGGACGUCAGGACCAGA	-	-	-	-	-	-	1 no_coords	Fail/lacking	recovered		recovered no valid hairpins	-	-	-	-	-	-	not evaluated: hairpin invalid	-	-	-
PID0264	Lin2015-zy	Tacam	aci-milR-3a-3		-	GCA_000766995.1_ASM76699v1_genomic	-	-	-	AGCGAAACGGACGUCAGGACCAA	-	-	-	-	-	-	1 no_coords	Fail/lacking	recovered		recovered no valid hairpins	-	-	-	-	-	-	not evaluated: hairpin invalid	-	-	-
PID0265	Lin2015-zy	Tacam	aci-milR-3b-1		-	GCA_000766995.1_ASM76699v1_genomic	-	-	-	CGGUCCUGGACGUCCGUUUACGC	-	-	-	-	-	-	1 no_coords	Fail/lacking	recovered		recovered no valid hairpins	-	-	-	-	-	-	not evaluated: hairpin invalid	-	-	-
PID0266	Lin2015-zy	Tacam	aci-milR-3b-5		JNBV01000028.1:314441-314545:-	GCA_000766995.1_ASM76699v1_genomic	JAHFZK010000013.1:146909-146993:+	GCA_022598595.1_ASM2259859v1	gene	CGGUCCUGGACGUCCGUUUACG	FALSE	UCUGCGCGGCGGUCCUGGACGUCCGUUUACGGACGCCCGAUUCUGACUUCUUAUUAACACUUUGGGUCAUCGUGCUUGCGUUGAGGAUGGGUUAGUAGCGCACGA	..((((((.(.(((((.(((((..((..((((..((((((.....................))))))..))))))..))))).))))).).).....)))))...	-33.1	[7, 30, 70, 91]	84	1 no_coords	Fail/lacking	recovered		valid	1-fail					Y	PCG-CDS-exon	Not tested: lacking an annotation	Not tested: not intergenic	4
PID0267	Lin2015-zy	Tacam	aci-milR-3b-6		-	GCA_000766995.1_ASM76699v1_genomic	-	-	-	GUCCUGGACGUCCGUUUACGCA	-	-	-	-	-	-	1 no_coords	Fail/lacking	recovered		recovered no valid hairpins	-	-	-	-	-	-	not evaluated: hairpin invalid	-	-	-
PID0268	Lin2015-zy	Tacam	aci-milR-3b-8		-	GCA_000766995.1_ASM76699v1_genomic	-	-	-	CGGUCCUGGGCGUCCGUUUACGC	-	-	-	-	-	-	1 no_coords	Fail/lacking	recovered		recovered no valid hairpins	-	-	-	-	-	-	not evaluated: hairpin invalid	-	-	-
PID0269	Lin2015-zy	Tacam	aci-milR-4		JNBV01000032.1:130317-130385:-	GCA_000766995.1_ASM76699v1_genomic	JAHFZK010000024.1:27995-28041:+	GCA_022598595.1_ASM2259859v1	gene	UGCGAUCGGACUUUUUGGAAU	TRUE	GCAUGUCUUCACCUGCGAUCGGACUUUUUGGAAUCGUUCCAAGAAGUCCUCUCGCGGGAAAAGGCGCGC	((.((((((..(((((((..(((((((((((((...)))))))))))))..)))))))..)))))).))	-39.2	[11, 32, 36, 57]	46	1 no_coords	Fail/lacking	recovered		valid	2-pass					Y	none	Not tested: lacking an annotation	Not tested: not intergenic	3
PID0270	Lin2015-zy	Tacam	aci-milR-5		JNBV01000020.1:615832-615890:+	GCA_000766995.1_ASM76699v1_genomic	JAHFZK010000004.1:1351067-1351125:+	GCA_022598595.1_ASM2259859v1	gene	AAAGAAUAGCAAAGAGUGAACA	TRUE	CAAAGAAUAGCAAAGAGUGAACAGGUACCCUUCGACUAUUCACUCUUUGGCAUUCUUUG	((((((((..(((((((((((.((...........)).)))))))))))..))))))))	-24.1	[0, 23, 35, 58]	58	1 no_coords	Fail/lacking	recovered		valid	2-pass					Y	PCG-UTR-exon	Not tested: lacking an annotation	Not tested: not intergenic	3
PID0271	Lin2015-zy	Tacam	aci-milR-6a-1		JNBV01000005.1:1325420-1325487:-	GCA_000766995.1_ASM76699v1_genomic	JAHFZK010000026.1:197646-197695:-	GCA_022598595.1_ASM2259859v1	gene	GCGAUCCUCAUGCGCUGUCGAU	TRUE	GUAUAGGCUUCAUCGGCAGCGUAUGGGGAUGAUGCGCGAUCCUCAUGCGCUGUCGAUGCAAUCUAUGC	(((((((...((((((((((((((((((((........))))))))))))))))))))...)))))))	-41.9	[9, 33, 34, 58]	49	1 no_coords	Fail/lacking	recovered		valid	2-pass					Y	none	Not tested: lacking an annotation	Not tested: not intergenic	3
PID0272	Lin2015-zy	Tacam	aci-milR-6a-3		-	GCA_000766995.1_ASM76699v1_genomic	-	-	-	AUCGGCAGCGUAUGGGGAUGAUGC	-	-	-	-	-	-	1 no_coords	Fail/lacking	recovered		recovered no valid hairpins	-	-	-	-	-	-	not evaluated: hairpin invalid	-	-	-
PID0273	Lin2015-zy	Tacam	aci-milR-6b-1		-	GCA_000766995.1_ASM76699v1_genomic	-	-	-	CGCGAUCCUCAUGCGCUGUCGA	-	-	-	-	-	-	1 no_coords	Fail/lacking	recovered		recovered no valid hairpins	-	-	-	-	-	-	not evaluated: hairpin invalid	-	-	-
PID0274	Lin2015-zy	Tacam	aci-milR-6b-3		-	GCA_000766995.1_ASM76699v1_genomic	-	-	-	CGCGAUCCUCAUGCGCUGUCGAU	-	-	-	-	-	-	1 no_coords	Fail/lacking	recovered		recovered no valid hairpins	-	-	-	-	-	-	not evaluated: hairpin invalid	-	-	-
PID0275	Lin2015-zy	Tacam	aci-milR-6b-5		-	GCA_000766995.1_ASM76699v1_genomic	-	-	-	CGAUCCUCAUGCGCUGUCGAUGC	-	-	-	-	-	-	1 no_coords	Fail/lacking	recovered		recovered no valid hairpins	-	-	-	-	-	-	not evaluated: hairpin invalid	-	-	-
PID0276	Lin2015-zy	Tacam	aci-milR-6b-7		-	GCA_000766995.1_ASM76699v1_genomic	-	-	-	CGAUCCUCAUGCGCUGUCGAUGCA	-	-	-	-	-	-	1 no_coords	Fail/lacking	recovered		recovered no valid hairpins	-	-	-	-	-	-	not evaluated: hairpin invalid	-	-	-
PID0277	Lin2015-zy	Tacam	aci-milR-7-3		JNBV01000041.1:96025-96145:+	GCA_000766995.1_ASM76699v1_genomic	CM040237.1:19092-19202:-	GCA_022598595.1_ASM2259859v1	gene	GGGGGUAGAUUAGUUUUUACAUAGAUA	TRUE	GAGGAAACUGGGGGUAGAUUAGUUUUUACAUAGAUAUACAUUAAGUAGUAGUUUUCAAGCUAUUUAUAUAGUCAAUUAUUAAAAAAACAUCUAUGUUAAGCUAAUUGGCUUUAGUUAAUUC	(((..((((((((...(((((((((..((((((((..........((((((((.....(((((....))))).)))))))).......)))))))).)))))))))..))))))))..)))	-27	[5, 37, 85, 115]	110	1 no_coords	Fail/lacking	recovered		valid	2-pass					Y	none	Not tested: lacking an annotation	Not tested: not intergenic	3
PID0278	Lin2015-zy	Tacam	aci-milR-9		JNBV01000018.1:324575-324630:-	GCA_000766995.1_ASM76699v1_genomic	JAHFZK010000037.1:3378-3431:-	GCA_022598595.1_ASM2259859v1	gene	UGGCUUCUCUCUAUCCUCGCAGACU	TRUE	CUGUGGCUUCUCUCUAUCCUCGCAGACUUGUGCUUGUGAGGAUGAGGGGUCCACAG	((((((..((((((.((((((((((.(....).)))))))))))))))).))))))	-30.7	[1, 24, 33, 54]	53	1 no_coords	Fail/lacking	recovered		valid	3-pass_rep					Y	PCG-CDS-exon	Not tested: lacking an annotation	Not tested: not intergenic	4
PID0279	Lin2015-zy	Tacam	aci-milR-10-1		-	GCA_000766995.1_ASM76699v1_genomic	-	-	-	UCUGGGUUCUUCCUCUCAUAUGA	-	-	-	-	-	-	1 no_coords	Fail/lacking	recovered		recovered no valid hairpins	-	-	-	-	-	-	not evaluated: hairpin invalid	-	-	-
PID0280	Lin2015-zy	Tacam	aci-milR-10-2		JNBV01000007.1:40543-40637:+	GCA_000766995.1_ASM76699v1_genomic	JAHFZK010000002.1:134601-134695:+	GCA_022598595.1_ASM2259859v1	gene	UACUGUGACAAGAACCCAAAGUAUU	TRUE	GGUCUGGGUUCUUCCUCUCAUAUGUACUGUGACAAGAACCCAAAGUAUUGGGCAGUUGUCAGGGUACAUACCAUGAGAAUGGAAGAACCCAGACC	((((((((((((((((((((((((((((.((((((...(((((....)))))...)))))).))))))))...)))))..)))))))))))))))	-59.7	[0, 24, 65, 94]	94	1 no_coords	Fail/lacking	recovered		valid	2-pass					Y	none	Not tested: lacking an annotation	Not tested: not intergenic	3
PID0281	Lin2015-zy	Tacam	aci-milR-11		JNBV01000016.1:474033-474213:-	GCA_000766995.1_ASM76699v1_genomic	JAHFZK010000016.1:275444-275604:+	GCA_022598595.1_ASM2259859v1	gene	AGUGGAAGAGUGCACAUCCG	TRUE	CGGUCUUGCACAUUCCAUCAGCUUCUUGUAAGGCUGCAUGUCUGGCCUCGCCUGGGUAGCAGAUUUUACACCUUGAGCAUUGCUUGCAGCAGCAUACUUAUGGAUUUGUUACAGGGUCUUUCCAAUUCCUGUAAUCGAGUCCUUCAAACAGCCUAACAAGAAGUGGAAGAGUGCACAUCCG	(((...(((((.((((....(((((((((.((((((...(((((((((.....))))..))))).........((((...((((......))))..)))).(((((((((((((((..........)))))))).)))))))......)))))).)))))))))))))..)))))...)))	-64.5	[10, 34, 149, 170]	160	1 no_coords	Fail/lacking	recovered		valid	3-pass_rep					Y	none	Not tested: lacking an annotation	Not tested: not intergenic	3
PID0282	Lin2015-zy	Tacam	aci-milR-12		JNBV01000004.1:181326-181469:-	GCA_000766995.1_ASM76699v1_genomic	JAHFZK010000003.1:277491-277634:-	GCA_022598595.1_ASM2259859v1	gene	GGGUCUUUCUUUGGUGAUACGAGAUUCAUC	TRUE	GGGUCUUUCUUUGGUGAUACGAGAUUCAUCUAUUUGACUGGUUCAUCUGCUGUCUUUUGGAGGCAUCGCUUCGGCUGGCGCUCAUGACAAGAUGGUGGUGGAUUGGAAGGAUUUUCCCGUGCAUCGAAGGAGACCAACAGAUUG	.((((((.((((((((.((((((((((.((((.((.(((...((((((..((((.....(((((...((....))..)).)))..)))))))))).))).)).)))).))))))...)))))))))))))))))).........	-47.8	[0, 23, 111, 143]	143	1 no_coords	Fail/lacking	recovered		valid	2-pass					Y	PCG-intron	Not tested: lacking an annotation	Not tested: not intergenic	3
PID0283	Lin2015-zy	Tacam	aci-milR-13		JNBV01000002.1:1839247-1839327:+	GCA_000766995.1_ASM76699v1_genomic	JAHFZK010000007.1:877188-877264:+	GCA_022598595.1_ASM2259859v1	gene	UACAUUAGUUAAUAGGAUCAAGA	TRUE	AGGUCUUGAUUCUAUCAACUGAUAUAUGCAUGUUGAAGACAAUCUUCAAUACGCAUACAUUAGUUAAUAGGAUCAAGACCU	(((((((((((((((.(((((((.(((((.(((((((((...))))))))).))))).))))))).)))))))))))))))	-44.2	[2, 25, 55, 78]	76	1 no_coords	Fail/lacking	recovered		valid	3-pass_rep					Y	PCG-CDS-exon	Not tested: lacking an annotation	Not tested: not intergenic	4
PID0284	Lin2015-zy	Tacam	aci-milR-14a-2		JNBV01000021.1:238876-238936:-	GCA_000766995.1_ASM76699v1_genomic	JAHFZK010000025.1:227654-227702:-	GCA_022598595.1_ASM2259859v1	gene	UACUGAGGGGUCGUCUAGACAGUU	TRUE	GUCGAAGGUACUGAGGGGUCGUCUAGACAGUUGGUCCAGGGGGCCCCUCAGUAUCCUUGAC	(((((.((((((((((((((.(((.(((.....))).))).)))))))))))))).)))))	-39.2	[6, 29, 31, 54]	48	1 no_coords	Fail/lacking	recovered		valid	3-pass_rep					Y	none	Not tested: lacking an annotation	Not tested: not intergenic	3
PID0285	Lin2015-zy	Tacam	aci-milR-14a-3		-	GCA_000766995.1_ASM76699v1_genomic	-	-	-	GGUCCAGGGGGCCCCUCAGUAUC	-	-	-	-	-	-	1 no_coords	Fail/lacking	recovered		recovered no valid hairpins	-	-	-	-	-	-	not evaluated: hairpin invalid	-	-	-
PID0286	Lin2015-zy	Tacam	aci-milR-14b-1		-	GCA_000766995.1_ASM76699v1_genomic	-	-	-	UACUGAGGGGUCGUCUAGACAGA	-	-	-	-	-	-	1 no_coords	Fail/lacking	recovered		recovered no valid hairpins	-	-	-	-	-	-	not evaluated: hairpin invalid	-	-	-
PID0287	Lin2015-zy	Tacam	aci-milR-14b-2		-	GCA_000766995.1_ASM76699v1_genomic	-	-	-	UACUGAGGGGUCGUCUAGACAGU	-	-	-	-	-	-	1 no_coords	Fail/lacking	recovered		recovered no valid hairpins	-	-	-	-	-	-	not evaluated: hairpin invalid	-	-	-
PID0288	Lin2015-zy	Tacam	aci-milR-15a-1		-	GCA_000766995.1_ASM76699v1_genomic	-	-	-	CCUUUAUCGUCUUUUUACUUAUUCAAUG	-	-	-	-	-	-	1 no_coords	Fail/lacking	recovered		recovered no valid hairpins	-	-	-	-	-	-	not evaluated: hairpin invalid	-	-	-
PID0289	Lin2015-zy	Tacam	aci-milR-15a-3		JNBV01000010.1:1155337-1155475:+	GCA_000766995.1_ASM76699v1_genomic	JAHFZK010000055.1:1944-2055:+	GCA_022598595.1_ASM2259859v1	gene	CCUUUUGGCUUCAAGGUCCU	TRUE	GCCGUUGAAAUACCACUACCUUUAUCGUCUUUUUACUUAUUCAAUGAGGCGGAGCUGGGAUUAACAGUCCCACCUUUUGGCUUCAAGGUCCUUUAAGGGCUGAUCCGGGUUGAAGACAUUGUCAGGUGGGGAGUUUGGC	((((....(((.((.((((((.((..((((((..((((......((((((.(((.(((((((...)))))))...))).)))))).((((((...)))))).....)))).))))))..))..)))))))).)))))))	-42.1	[16, 40, 103, 127]	111	1 no_coords	Fail/lacking	recovered		valid	2-pass	RF02543	3.82e-68	Eukaryotic large subunit ribosomal RNA	rRNA	Y	none	Not tested: lacking an annotation	Not tested: not intergenic	4
PID0290	Lin2015-zy	Tacam	aci-milR-15b-1		-	GCA_000766995.1_ASM76699v1_genomic	-	-	-	GACAUUGUGAAAAGACAUAGAGGGU	-	-	-	-	-	-	1 no_coords	Fail/lacking	recovered		recovered no valid hairpins	-	-	-	-	-	-	not evaluated: hairpin invalid	-	-	-
PID0291	Lin2015-zy	Tacam	aci-milR-15b-2		-	GCA_000766995.1_ASM76699v1_genomic	-	-	-	UUGUGAAAAGACAUAGAGGGUG	-	-	-	-	-	-	1 no_coords	Fail/lacking	recovered		recovered no valid hairpins	-	-	-	-	-	-	not evaluated: hairpin invalid	-	-	-
PID0292	Lin2015-zy	Tacam	aci-milR-15b-3		-	GCA_000766995.1_ASM76699v1_genomic	-	-	-	UGACAUUGUGAAAAGACAUAGAGGG	-	-	-	-	-	-	1 no_coords	Fail/lacking	recovered		recovered no valid hairpins	-	-	-	-	-	-	not evaluated: hairpin invalid	-	-	-
PID0293	Lin2015-zy	Tacam	aci-milR-15b-4		-	GCA_000766995.1_ASM76699v1_genomic	-	-	-	UUUGACAUUGUGAAAAGACAUAGAGG	-	-	-	-	-	-	1 no_coords	Fail/lacking	recovered		recovered no valid hairpins	-	-	-	-	-	-	not evaluated: hairpin invalid	-	-	-
PID0294	Lin2015-zy	Tacam	aci-milR-15c-1		-	GCA_000766995.1_ASM76699v1_genomic	-	-	-	UAUCGAUCCUUUAGUCCCUC	-	-	-	-	-	-	1 no_coords	Fail/lacking	recovered		recovered no valid hairpins	-	-	-	-	-	-	not evaluated: hairpin invalid	-	-	-
PID0295	Lin2015-zy	Tacam	aci-milR-16-2		JNBV01000006.1:574112-574250:+	GCA_000766995.1_ASM76699v1_genomic	JAHFZK010000001.1:3315208-3315302:+	GCA_022598595.1_ASM2259859v1	gene	GGAUGCUUACGAAUACGAUGGA	TRUE	AUGAGAUGGAUUCCUGCCAGGAUCGCAGGAUGCUUACGAAUACGAUGGACAAUUUUAUUGCACUCUACUUUUUUUCUACUCUUUACGCAUUUUUAUUCUGUUUAUUACCGGCAUUCUUCAUUUCGCACAUCAUUUUCAU	((((((..(((...(((..(((..(.((((((((....((((.((((((.........(((.........................))).......))))))))))...)))))))).)..)))))).)))..))))))	-21.6	[24, 48, 96, 118]	94	1 no_coords	Fail/lacking	recovered		valid	2-pass					Y	none	Not tested: lacking an annotation	Not tested: not intergenic	3
PID0296	Lin2015-zy	Tacam	aci-milR-17a-1		JNBV01000009.1:626030-626128:-	GCA_000766995.1_ASM76699v1_genomic	JAHFZK010000002.1:1798726-1798824:-	GCA_022598595.1_ASM2259859v1	gene	UGCUCUGGUACUUCCUUGACCACA	TRUE	GGUCUGAUUGUCUUCCUUCUCAUGGACUGUGCUCUGGUACUUCCUUGACCACAAGGAAGCACUAGGGCACAUACCAUGAGAAUGGAAGAUGCUCAGACC	(((((((.(((((((((((((((((..(((((((((((.((((((((....)))))))).)))))))))))..))))))))).)))))))).)))))))	-66.5	[0, 24, 73, 98]	98	1 no_coords	Fail/lacking	recovered		valid	2-pass					Y	none	Not tested: lacking an annotation	Not tested: not intergenic	3
PID0297	Lin2015-zy	Tacam	aci-milR-17a-2		-	GCA_000766995.1_ASM76699v1_genomic	-	-	-	UCUGAUUGUCUUCCUUCUCAUGGAC	-	-	-	-	-	-	1 no_coords	Fail/lacking	recovered		recovered no valid hairpins	-	-	-	-	-	-	not evaluated: hairpin invalid	-	-	-
PID0298	Lin2015-zy	Tacam	aci-milR-17a-3		-	GCA_000766995.1_ASM76699v1_genomic	-	-	-	UCUGAUUGUCUUCCUUCUCAUGGA	-	-	-	-	-	-	1 no_coords	Fail/lacking	recovered		recovered no valid hairpins	-	-	-	-	-	-	not evaluated: hairpin invalid	-	-	-
PID0299	Lin2015-zy	Tacam	aci-milR-17b-1		-	GCA_000766995.1_ASM76699v1_genomic	-	-	-	UACCAUGAGAAUGGAAGAUGCUCAGA	-	-	-	-	-	-	1 no_coords	Fail/lacking	recovered		recovered no valid hairpins	-	-	-	-	-	-	not evaluated: hairpin invalid	-	-	-
PID0300	Lin2015-zy	Tacam	aci-milR-17b-2		-	GCA_000766995.1_ASM76699v1_genomic	-	-	-	UACCAUGAGAAUGGAAGAUGCUCA	-	-	-	-	-	-	1 no_coords	Fail/lacking	recovered		recovered no valid hairpins	-	-	-	-	-	-	not evaluated: hairpin invalid	-	-	-
PID0301	Lin2015-zy	Tacam	aci-milR-17b-3		-	GCA_000766995.1_ASM76699v1_genomic	-	-	-	CAUGAGAAUGGAAGAUGCUCAGACC	-	-	-	-	-	-	1 no_coords	Fail/lacking	recovered		recovered no valid hairpins	-	-	-	-	-	-	not evaluated: hairpin invalid	-	-	-
PID0302	Lin2015-zy	Tacam	aci-milR-17c-1		JNBV01000009.1:626041-626117:+	GCA_000766995.1_ASM76699v1_genomic	JAHFZK010000002.1:1798746-1798805:+	GCA_022598595.1_ASM2259859v1	gene	AAGUACCAGAGCACAGUCCAUGA	FALSE	CUUCCAUUCUCAUGGUAUGUGCCCUAGUGCUUCCUUGUGGUCAAGGAAGUACCAGAGCACAGUCCAUGAGAAGGAAG	(((((.(((((((((..(((((.((.(((((((((((....))))))))))).)).)))))..))))))))))))))	-49.4	[9, 33, 44, 68]	59	1 no_coords	Fail/lacking	recovered		valid	1-fail					Y	none	Not tested: lacking an annotation	Not tested: not intergenic	4
PID0303	Lin2015-zy	Tacam	aci-milR-17c-2		-	GCA_000766995.1_ASM76699v1_genomic	-	-	-	AAGUACCAGAGCACAGUCCAUGAG	-	-	-	-	-	-	1 no_coords	Fail/lacking	recovered		recovered no valid hairpins	-	-	-	-	-	-	not evaluated: hairpin invalid	-	-	-
PID0304	Lin2015-zy	Tacam	aci-milR-18		JNBV01000008.1:408257-408324:-	GCA_000766995.1_ASM76699v1_genomic	JAHFZK010000006.1:896478-896525:+	GCA_022598595.1_ASM2259859v1	gene	UUGCGUUCGACUUGUUCUCCCU	TRUE	GGCAGAACCUCCUUGCGUUCGACUUGUUCUCCCUCCGGGAAAACGAGCGGACACACGGAGGUCCUGCC	(((((.((((((.((.(((((.((((((.((((...)))).))))))))))).)).)))))).)))))	-40.9	[10, 32, 36, 57]	47	1 no_coords	Fail/lacking	recovered		valid	2-pass					Y	none	Not tested: lacking an annotation	Not tested: not intergenic	3
PID0305	Lin2015-zy	Tacam	aci-milR-19a-1		JNBV01000008.1:728757-728863:+	GCA_000766995.1_ASM76699v1_genomic	JAHFZK010000006.1:553352-553438:-	GCA_022598595.1_ASM2259859v1	gene	GUAUGUGACCUACAAUAGAGGUGC	TRUE	UAAGAGAAUUCGGUAUGUGACCUACAAUAGAGGUGCAUUCAGUACAUUAUCCAUCUUGUCUGGGCUUGAUCAUGCACCUCUAGUGCAGGUCACAUACUGAACUCUUA	((((((..(((((((((((((((.((.(((((((((((((((.(((..........)))))))........))))))))))).)).)))))))))))))))))))))	-51.5	[11, 35, 73, 97]	86	1 no_coords	Fail/lacking	recovered		valid	2-pass					Y	PCG-UTR-exon	Not tested: lacking an annotation	Not tested: not intergenic	3
PID0306	Lin2015-zy	Tacam	aci-milR-19a-2		-	GCA_000766995.1_ASM76699v1_genomic	-	-	-	CACCUCUAGUGCAGGUCACAUACU	-	-	-	-	-	-	1 no_coords	Fail/lacking	recovered		recovered no valid hairpins	-	-	-	-	-	-	not evaluated: hairpin invalid	-	-	-
PID0307	Lin2015-zy	Tacam	aci-milR-19b		-	GCA_000766995.1_ASM76699v1_genomic	-	-	-	UAUGUGACCUACAAUAGAGGUGC	-	-	-	-	-	-	1 no_coords	Fail/lacking	recovered		recovered no valid hairpins	-	-	-	-	-	-	not evaluated: hairpin invalid	-	-	-
PID0308	Lin2015-zy	Tacam	aci-milR-20		JNBV01000001.1:465987-466061:+	GCA_000766995.1_ASM76699v1_genomic	JAHFZK010000005.1:70521-70589:-	GCA_022598595.1_ASM2259859v1	gene	CGUUUGGCUCGUCUCUUCGUGCUCU	FALSE	GAGGACGUUUGGCUCGUCUCUUCGUGCUCUCGUGAGAGUGGUGCGGGGAGCGAACCAGCGAGUUGGACGUAUGUC	....(((((((((((((((((((((((((((....))).))))))))))).......))))))))))))).....	-32.9	[3, 29, 36, 71]	68	1 no_coords	Fail/lacking	recovered		valid	2-pass					Y	none	Not tested: lacking an annotation	Not tested: not intergenic	3
PID0309	Lin2015-zy	Tacam	aci-milR-21-1		JNBV01000041.1:95175-95234:+	GCA_000766995.1_ASM76699v1_genomic	CM040237.1:20001-20055:-	GCA_022598595.1_ASM2259859v1	gene	GUAAAGUUAAGAUGAAUUAAAGCUA	TRUE	CUGCUUUGAAAAUCUUAACUUUAAUAUAGCUAAUGUAAAGUUAAGAUGAAUUAAAGCUAG	..(((((((..((((((((((((.(((.....)))))))))))))))...)))))))...	-18.5	[2, 26, 32, 56]	54	1 no_coords	Fail/lacking	recovered		valid	2-pass					Y	none	Not tested: lacking an annotation	Not tested: not intergenic	3
PID0310	Lin2015-zy	Tacam	aci-milR-21-2		-	GCA_000766995.1_ASM76699v1_genomic	-	-	-	UGUAAAGUUAAGAUGAAUUAAAGC	-	-	-	-	-	-	1 no_coords	Fail/lacking	recovered		recovered no valid hairpins	-	-	-	-	-	-	not evaluated: hairpin invalid	-	-	-
PID0311	Lin2015-zy	Tacam	aci-milR-21-3		-	GCA_000766995.1_ASM76699v1_genomic	-	-	-	AAAGUUAAGAUGAAUUAAAGCUAGA	-	-	-	-	-	-	1 no_coords	Fail/lacking	recovered		recovered no valid hairpins	-	-	-	-	-	-	not evaluated: hairpin invalid	-	-	-
PID0312	Bai2015-hu	Asfla	Afl-milR-1		Contig_2.10:1382607-1382679:+	broad.fixed.aspergillus_flavus_2_contigs	JZDT01000390.1:23-75:+	GCA_000952835.1_ASM95283v1	gene, TE	GCUGGUAUCUGCGAACGACUUGC	FALSE	CGCCUCGAUAGCUGGUAUCUGCGAACGACUUGCUUCGGUGAGCUUGUUCGAGUGCCUUUUGUCCAGGGAGUGG	..(((.(((((..((((.((.((((((((((((....))))).)))))))))))))..))))).)))......	-26.3	[8, 32, 37, 60]	52	5 success	Coordinates	published		valid	0-no_evidence	RF01846	1.11e-33	Fungal small nucleolar RNA U3	snoRNA	Y	none	Y	N	4
PID0313	Bai2015-hu	Asfla	Afl-milR-2		-	broad.fixed.aspergillus_flavus_2_contigs	-	-	-	GGCAAGAUGACCGAGUGGUUA	-	-	-	-	-	-	5 success	Coordinates	published		secondary structure in duplex	-	-	-	-	-	-	not evaluated: hairpin invalid	-	-	-
PID0314	Bai2015-hu	Asfla	Afl-milR-3		-	broad.fixed.aspergillus_flavus_2_contigs	-	-	-	GGCGAGAUGGCCGAGCGGUCU	-	-	-	-	-	-	5 success	Coordinates	published		secondary structure in duplex	-	-	-	-	-	-	not evaluated: hairpin invalid	-	-	-
PID0315	Bai2015-hu	Asfla	Afl-milR-4		Contig_2.1:2942026-2942357:-	broad.fixed.aspergillus_flavus_2_contigs	JZDT01000006.1:38744-38951:+	GCA_000952835.1_ASM95283v1	gene, TE	GUGGAGGAUUGGGACGGGGU	FALSE	GCCAUCGUCAACACGGCCGGCGCAAAGCUCGUCUGGGGCCCCUUCCAUCUACCCGGGAUCUGGGGUAUCCUGGUCAAUACCUUUGCGCUUAUCUAUAUGACGAUCGCUGUCUUCUUUAGCUUCUGGCCACCGCAGCAUACGGUCACGGUUGAUACGAUGAAUUUUAGUGUAGUUGGUACCGUGGGGGUUAUUAUUUUGAGUCUUGUGUAUUAUGUGCUAAGGGCGAGGAAUGUAUAUGAGGGACCUAUUGUUGAGAUACAAAUUUGAGUUUGUUGAGUGUGUAUUUAUACUAUACUAUAUAUGUGGAGGAUUGGGACGGGGUUGAAUAGUGG	...(((((((........(((((((((...(.((((((((((((((........))))...)))))..))))).).....)))))))))........)))))))(((((((..((((...((((((((.(((((..(((.(((((((((...((((.(((...))).))))......)))))).(((((..((((((..(((((..((((...))))..)))))..)))))).........)))))...((..(((((((.((((((.....)))))).)))))))..))...))).))).))))).)).)))))).))))..).)))))).	-90.4	[112, 134, 300, 321]	209	5 success	Coordinates	published		valid	0-no_evidence					Y	PCG-CDS-exon	N	Not tested: not intergenic	4
PID0316	Bai2015-hu	Asfla	Afl-milR-5		Contig_2.2:900140-900262:+	broad.fixed.aspergillus_flavus_2_contigs	JZDT01000428.1:19182-19285:-	GCA_000952835.1_ASM95283v1	gene, TE	CUUUGGAGGGAUUGGUGGGA	FALSE	CUUGCGCAAGCUCUUCGAAUCCCUUUCCAAACGAUUGGAUGAUGUUGUAUCCACUGGAGAUACCCAACCUUGACCAGUUAUUUUCACGUCCCUCUUUGGAGGGAUUGGUGGGACUGAUGCUUU	...(((((..(((..(.((((((..((((((.((..(((((.((..(((...(((((................))))))))...))))))).)))))))))))))).).)))..)).)))...	-33.3	[9, 34, 91, 112]	103	5 success	Coordinates	published		valid	0-no_evidence					Y	none	Y	N	3
PID0317	Bai2015-hu	Asfla	Afl-milR-6		Contig_2.2:2593810-2594108:+	broad.fixed.aspergillus_flavus_2_contigs	JZDT01000029.1:4691-4971:-	GCA_000952835.1_ASM95283v1	gene, TE	GAGGGCGGAGAGGGGUGGAA	FALSE	GUAAGGUCUUCUAGCUUUCUUCCAGCCCAGCCACCAUGCUAAAACGUUGCGCGAACUGGUCAGAGGAAGGACGGCUUAUAUAAUCGUCAAUGACCACUCGAAAGCUCACCAGCAAUCUCUCUUUAACGAGUCCGAGAUGCUUAUAUCCGGCGGGGGAACAAAAGGGAACAGUCGAGCUUCAAGUCCGAGUGUUCUGGGGGAAGUAAACGAGUGGCGGGCGGAGAGCAAAGGUUCGUCAAGGUCAGACGCCAGGCCGACAAACGGGGAAUGAGGGCGGAGAGGGGUGGAAAGGACCCGAG	....(((((((((.((((((.((.(((((((......)))....((((...((..(((((.....((..((((((((......(((((..((.(((((((...(((..((((((.((((.(((....)))...))))))))....(((......))).......((((((.(((.(((...))).))).))))))..))..)))...)))))))))))))).......))).)))))....))....)))))..))...))))........)))))))))))).))))..)))))....	-94.9	[8, 31, 267, 288]	280	5 success	Coordinates	published		valid	0-no_evidence					Y	near-PCG	N	Not tested: not intergenic	3
PID0318	Bai2015-hu	Asfla	Afl-milR-7		Contig_2.2:4019565-4019849:+	broad.fixed.aspergillus_flavus_2_contigs	JZDT01000506.1:20691-20956:+	GCA_000952835.1_ASM95283v1	gene, TE	GUGGGAGGUUGAGUGGGUGGUA	FALSE	AUGUUGCAGGGUGGGAGGUUGAGUGGGUGGUACGAUAGAUAUAGAUAUGGACCCUUUGAGUCGUUGUUUUCAUUUUCUUUUCUUGGACACUCAUGACAUGUAUGAAACGUGUUAGAUGUUCUCCAUGGUAGAGAGCAAUGAAGAAAUGAAUUUAGUAACCAGGAGUAUCAAAGCUACGUCCUCUGGGUCGUCAGUCCAUUUUACUCCAGUUGCAAAGAAUAAGGACUUCUUUUUUUUUUUUUUUUUUCUUCCUUCAUUUCCACCUAUCCCUUCCCCUCGCUACUA	..((.((.(((.((((((..((.(((((((...((..((...(((...........(((((((((.((((((((((((((((.((((.((((.((((((((.....)))))))))).))..)))).)).)))))).)))))))))))).)))))(((((..((((((.....((((((.((....)).))).)))......)))))).)))))((((((.((((....)))).)))))).......)))))..))....)))))))))))))))))).)).))..	-78.1	[8, 31, 257, 276]	268	5 success	Coordinates	published		valid	0-no_evidence					Y	PCG-UTR-exon	N	Not tested: not intergenic	3
PID0319	Bai2015-hu	Asfla	Afl-milR-8		-	broad.fixed.aspergillus_flavus_2_contigs	-	-	-	UUUUGUGGAAUCUGCCUCGCGCU	-	-	-	-	-	-	5 success	Coordinates	published		secondary structure in duplex	-	-	-	-	-	-	not evaluated: hairpin invalid	-	-	-
PID0320	Bai2015-hu	Asfla	Afl-milR-9		Contig_2.3:1006043-1006331:-	broad.fixed.aspergillus_flavus_2_contigs	JZDT01000323.1:42316-42572:-	GCA_000952835.1_ASM95283v1	gene, TE	GGCGAGAUGGCCGAGCGGUCC	FALSE	AUAGCUGCCUAUACAUAUAAUGAAAUCACUCGGGUUAUGUCCCUACUAGGUUAGAAAGGAGAUUCUCGAAGGAUUAAUUCAAUUUGAAAUGGAUAUCUAACUAAUUGGGCUCAUGGGAUAAAAAAAAAGAAAAGAUCUAGCAUAUGUACGAAUUGCCUGCACCGUAAACAUUUUACAUAUUUAGUCCUUUAGGAGACAAUGUGUAUAGUAAAGUUACUGCUGAAUAUAUGCAAAACAAAAAAAGCAAUUCAACCAAUAGGCGAGAUGGCCGAGCGGUCCAAGGCGGUUA	.(((((((((..........((..(((.(((((.((((.((((((...((((.(((..(....((((((((((((((.......(((((((..(((.....(((((.(((..(((((((...............))))..)))..)).).)))))........)))..))))))).....))))))))))..))))...((((((((....(((....)))...))))))))............)..)))))))..)))).)).))))))))).))).)))))))))))	-60.3	[21, 44, 256, 278]	257	5 success	Coordinates	published		valid	0-no_evidence	RF00005	1.09e-10	tRNA	tRNA	Y	near-PCG	N	Not tested: not intergenic	4
PID0321	Bai2015-hu	Asfla	Afl-milR-10		Contig_2.4:2118793-2118989:+	broad.fixed.aspergillus_flavus_2_contigs	JZDT01000866.1:8901-9079:-	GCA_000952835.1_ASM95283v1	gene, TE	CUGGAUUCGUCCCGGGAACCC	FALSE	UCCCCAAGGACUGGAUUCGUCCCGGGAACCCUCGAAUGCCGUCGGCGAAUAGAUACCAUAAAGCGUCGGGGUCGUCAAAUUCAUGAUCGAACCAGUCCGACUGACGCUGGUAGACCCGGCAUCCUUAGGGUUUAAAAAGUCUGGGUUGGCGGGUUCCGCAGGGCUCGAGGGUUCGGAUGAUUCGGUCGAGGCUGGAG	(((((...((((((((.(((((...((((((((((..(((.((((........(((((....(((((((((((((((......))).)).))).......))))))))))))((((((.((.(((.(((.((....)).)))))).)).))))))))).).))))))))))))))))))))))))))..))..))).	-82.3	[8, 30, 168, 186]	178	5 success	Coordinates	published		valid	0-no_evidence					Y	PCG-CDS-exon	N	Not tested: not intergenic	4
PID0322	Bai2015-hu	Asfla	Afl-milR-11		Contig_2.4:309279-309610:-	broad.fixed.aspergillus_flavus_2_contigs	JZDT01000523.1:22812-23049:+	GCA_000952835.1_ASM95283v1	gene, TE	AGCGGUCUAAGGCGCACGGUUCA	FALSE	AAGGUUCACCGAUGGCAGUGUCUCAGAUACAACCGGACGUUGUGGGAGAGGGAGCAGGAAAAAAGAAAAAAAAAAAAAAAAAAAAAAAAAAAGGCAGAACACCAGCGCCGAAUGGAUGAGCGAGCCACAAGGAGUGUGGGUGAAGAGCCCAUAGAGCAAGACAAUCCAGAGGAAGCAGCUUUAGAAGGAGAGGAUACGCAGAGAGGCAGGACGGGAAUGUGCAAGGGUAUGAGAGUAUAUUUAACUACUAUCUAGAUUAUAUGAUUUGACAUAACACACAUCAAUCGGCAAGGUGGCCGAGCGGUCUAAGGCGCACGGUUCAGGUUAACCUG	.(((((.(((....((..(.((((...((((((.....)))))).)))).)..)).........................................((((.(..(((((...((((((..((.(((((..(...(((((((.....)))))))...)....(..(((....((((...))))....)))..).....((......))....(((..(((((......((((.((((.(((.((((((.....))).))).)))))))..))))...)))))...))).....)))))))..).))))).)))))..))))).))).))))).	-72.6	[95, 121, 297, 321]	226	5 success	Coordinates	published		valid	0-no_evidence	RF00005	4.08e-19	tRNA	tRNA	Y	none	Y	N	4
PID0323	Bai2015-hu	Asfla	Afl-milR-12		Contig_2.10:1703545-1703832:+	broad.fixed.aspergillus_flavus_2_contigs	JZDT01000293.1:17920-17995:-	GCA_000952835.1_ASM95283v1	gene, TE	CUUCUAUCUCGUCGGGGGUCA	FALSE	AGCGGCAGAGGCCAGAGCCAGAGCUACAGUGAUUGGGACCGCCUUGUGGGGUUGCCCGACGGAGAUCGAGCGGGCGAGAACGUCCACAUCACUGGCAGUCUGUUUCUGUUGGACCGCUCGUUCAUUUUCGGGCGGCGUUGACACUAGACAGAUUUUGGGUACACUCCCAGGAAUAGUCUCUGGCGUUGAUGCUAAGCCCAUCUUCACUCCUGCUUGACGACGGAUUGAAUCUAGACGUGCUAGCAAGUCUGGAUGCACUUCUAUCUCGUCGGGGGUCAGAUUCCCGUC	...(((...((((((.(((((((((((((((((..(((((((((.((..((((.((....)).))))..))))))).....))))..)))))))..(((((((((.((((((.(((((((........)))))))..))))))..)))))))))(((((......)))))...))).))))))).)))..)))..))).((((..(((((((..(((.((.(((.((.((((((((.((....)).)))))))).))..))).))))).))))))).)))).......	-107.9	[202, 226, 255, 277]	75	5 success	Coordinates	published		valid	0-no_evidence					Y	PCG-CDS-exon	N	Not tested: not intergenic	4
PID0324	Bai2015-hu	Asfla	Afl-milR-13		Contig_2.12:999090-999221:+	broad.fixed.aspergillus_flavus_2_contigs	JZDT01000752.1:46953-47064:-	GCA_000952835.1_ASM95283v1	gene, TE	CUUUCUGGUUGAUGGCGUCGGA	FALSE	UCGCACAGGAUCAGACUGUCGUCUUCGAGGAGGAACAUUUCGACACCAAAAACACCCUUUCCGUCGAAGGCUGCGACGGCCUUACGUGCUAACUCCUGGGCUUUCUGGUUGAUGGCGUCGGACACGUUGCGC	.((((..(..((.(((.((((((..(.((((((..((..(((((..................)))))((((((...))))))...((....))...))..)))))).)..))))))))).))..)..)))).	-40.5	[10, 34, 98, 121]	111	5 success	Coordinates	published		valid	0-no_evidence					Y	PCG-CDS-exon	N	Not tested: not intergenic	4
PID0325	Bai2015-hu	Asfla	Afl-milR-14		Contig_2.12:1344051-1344310:+	broad.fixed.aspergillus_flavus_2_contigs	JZDT01000115.1:117676-117915:+	GCA_000952835.1_ASM95283v1	gene, TE	AAAGGGGCAUGGGUAGUAUGA	FALSE	UACGAGGAAGUCGUGCGCUUCCGUGCCGCCGUCCGGCAGCAGUCCCAGGCGCAGGCCGCCGCUGCCGCCCAACAGCAGCAGAUUGCCCAGCAGACCAACGUCCCGAUCCCCGAGAACCAGCAGGGCGUUUGGAAGCAAGAGGAGCCCAAGCCUCAAGAGGCGCUCGCCGCGGGCGGUGGCGUCCACAACGAUCUGGAAUCGUCGCUGCAGCGUGGAAUGGACGUACAAUAAAGGGGCAUGGGUAGUAUGAAAUCCUUGAC	..((((((..((((((...((((((((.(((((((((.(((((....(((....)))...))))).))).....((..(((((.((((.((.(((....))).((.....)).......)).)))))))))...)).....((((....((((....)))))))).(((((.(((((((((((((........))))..)))))))))..)))))...))))).........).))))))))..))))))..))))))..	-105.2	[10, 33, 227, 249]	239	5 success	Coordinates	published		valid	0-no_evidence					Y	PCG-CDS-exon	N	Not tested: not intergenic	4
PID0326	Bai2015-hu	Asfla	Afl-milR-15		Contig_2.12:1371996-1372302:-	broad.fixed.aspergillus_flavus_2_contigs	JZDT01000115.1:145801-145857:-	GCA_000952835.1_ASM95283v1	gene, TE	CUGGUCGGGUUUGAUGAUGGA	FALSE	UGACGGCGGGCUGGUCGGGUUUGAUGAUGGAGUUGGCGAGUGCAUUGUGGAAUUAUGGAGCGGGUGGUGGUGCGAAGAGUGGUUAGUUGGCGCUUGGAGGUUGAUAGGAUGGCUGCGUGGCAGCGGGUUAGAUGGUGCGGUUGUGCCAUGGUUAUUGGGUGUUCGUGUUUUGAUGUUUGGUCGUUGCGAUAGAGGGUUCAGGUGUUGUCGGAACUUAUUUUGUUGGAUUUUCUCGGGUGGGCUUAAGCGGUGGCCUGAGCGGAGCCAAGAUUGGACCUCUUCUUGUCAGAUGAUGUCCGAUUGUGGG	..((.((.(.(((.((.(((((.((((((.(.((...)).).)))))).))))..).)).))).).)).))((((......((((.((((((...(((((((.(.....(((((.(((.(((.(.(((...(((((((....)))))))....))).).)))(((((...((((.....)))).)))))..((((((((((..(((.....)))........))))))))))((((((.(.(......).).))))))))).)))))....).)))))))...)))))).))))......))))...	-88.9	[8, 30, 40, 64]	56	5 success	Coordinates	published		valid	0-no_evidence					Y	PCG-CDS-exon	N	Not tested: not intergenic	4
PID0327	Bai2015-hu	Asfla	Afl-milR-16		Contig_2.13:77199-77304:+	broad.fixed.aspergillus_flavus_2_contigs	JZDT01000199.1:450-539:-	GCA_000952835.1_ASM95283v1	gene, TE	AUUGCUUGCAUGUUCGUUCUGGA	FALSE	GAUCUUAGGGAUUGCUUGCAUGUUCGUUCUGGAACCGCCCUGGAUUGUUGUACUUGACACUAAAACCCUUUCUGUAGAGCGAGCGCUGCUGUGAUCGCCCGCAUCC	.......((((((((..(((((((((((((((((......(((..(((((....)))))))).......))))..)))))))))).))).)))))).)).......	-26.6	[8, 32, 70, 97]	89	5 success	Coordinates	published		valid	0-no_evidence					Y	PCG-CDS-exon	N	Not tested: not intergenic	4
PID0328	Bai2015-hu	Asfla	Afl-milR-17		Contig_2.14:396817-397168:+	broad.fixed.aspergillus_flavus_2_contigs	JZDT01000478.1:118568-118634:-	GCA_000952835.1_ASM95283v1	gene, TE	CUUUCUCAUAUAUACGUCGGAA	FALSE	UUCUCUGACACUUUCUCAUAUAUACGUCGGAACCUUCCCGUCCUGGAUGGAUUUGCUGUGCGGUAAGUGCAAGUGUUAGGAGCCAAGAAGCUAGCAUGAUAACGUCUACAUUGGGACGACACAUUGAUUCGAAGCUCUUUAGCAGUUCUUGUGGAGAGUUCAGCAUCAGUGGUUGUGGAAACAGUGCAUGAAGAACGGUCAACCAAUCGUAAGCGGAUCCCGCAAUAUCCGCAACUUCAUCCUUUGGUGGAAUCAUAUUUUGUAGUUUCGGUCGAACAUCGAUUGACAAUUGCGCAAAUAUUUUAUCUAUGCGUUGCUCCGUCUGACGUUCAUGUUGGCAUGGAUCAGCGCU	....(((((((((.(.(.(((.((((.((((.((.(((......))).)).)))).))))..))).).).)))))))))((.(((....((((((((((..(((((..(((((..(((((.(((((((.(..(((((((((.((.....)))))))))))..).)))))))))))).....))))).....(((.(((.((((((...((((((((((........))))))...((((((....))))))...(((((((((((((((((((((...)))))))).))))))).)))))).))))...)).))))..))))))))))))))))))))).))).))......	-106.4	[8, 31, 50, 74]	66	5 success	Coordinates	published		valid	0-no_evidence					Y	PCG-CDS-exon	N	Not tested: not intergenic	4
PID0329	Bai2015-hu	Asfla	Afl-milR-18		Contig_2.14:359903-360179:-	broad.fixed.aspergillus_flavus_2_contigs	JZDT01000164.1:35252-35299:+	GCA_000952835.1_ASM95283v1	gene, TE	CCAUGAUACUUUGUUGGUCGGA	FALSE	GAGAGGCGCGCCAUGAUACUUUGUUGGUCGGACUCUCUGCUUGGCGAAUCGUGGUCUGCUUUCGUCUUUCGCUCUUGCAACUCGGGUACUUCAUAGUAUACCUUAGGGUAUGUGUUAGAAGUAUUGAGCGCCUGUCAAUGAAUUCUAGUCUAGUGGUUAGACUCACCCUGGCUAUCGAAAAGUAUUCAACAACUACAGAACAGAUGUUCAUUCCCAGAUUGAACAAAAUGGCAAACUUAGUCGACACACCAUCGACCAAGGCUAUGGCGAGCGGCCC	(((((.((.((((((((...(((((((.((((...)))).))))))))))))))).)))))))(((.((((((...((..(((((.(((((((..(((((((....)))))))..).))))))))))).))((((...(((((.((..((..((((((((.......)))))))).))..)).)))))......))))......((((((.((...)).))))))..(((((...(((.(((((.......))))).)))))))))))))).)))..	-78.1	[8, 31, 35, 55]	47	5 success	Coordinates	published		valid	0-no_evidence					Y	PCG-CDS-exon	N	Not tested: not intergenic	4
PID0330	Bai2015-hu	Asfla	Afl-milR-19		Contig_2.16:347-452:+	broad.fixed.aspergillus_flavus_2_contigs	JZDT01000286.1:4455-4542:+	GCA_000952835.1_ASM95283v1	gene, TE	AGCGAGACGACCUGCCUGGCA	FALSE	CGCGGCUGGGGUGGGCGGGCGUCCCCGUUUCCUCACGCGAGGCCCGACGAGCGGGUACCUUUGGCGACGAGGCACAGCGAGACGACCUGCCUGGCAGGGAAGUUGU	.((((((..(.((((((((((((..((((.((((.(((((((((((.....))))..))))..)))..))))...)))).)))).)))))))).).....))))))	-46	[8, 30, 73, 95]	87	5 success	Coordinates	published		valid	0-no_evidence					Y	none	Y	N	3
PID0331	Bai2015-hu	Asfla	Afl-milR-20		-	broad.fixed.aspergillus_flavus_2_contigs	-	-	-	CAUCUCUCUUGUCGGUUCGAGA	-	-	-	-	-	-	5 success	Coordinates	published		secondary structure in duplex	-	-	-	-	-	-	not evaluated: hairpin invalid	-	-	-
PID0332	Bai2015-hu	Asfla	Afl-milR-21		Contig_2.1:3841925-3842107:+	broad.fixed.aspergillus_flavus_2_contigs	JZDT01000098.1:10876-11038:+	GCA_000952835.1_ASM95283v1	gene, TE	AUGGGGGUCUGUAUGUGAUGGA	FALSE	ACCGUCUUCUUCUUCGCGAGAUCUCCCGAUGCACCAAGUACUACAAUGACAGUGUCAUCUUUAAGCUCGAUGGUGCUAAGCGAAAUUUCCAUGUUAGCAGCGAAUUAGAGGCACUUGCAGAGCAGGGAUGGUGAAUGGUGUAUGUCGAUCAAUGGGGGUCUGUAUGUGAUGGAAGGAUAAUUU	......((((((((((((((((((((((((((((((..(((((..(((((...)))))((((((..((...(.((((((..((....))....)))))).))).))))))...(((((...)))))..)))))..))))))..))))......))))))))...))))).)))))))......	-50.3	[10, 29, 149, 172]	162	5 success	Coordinates	published		valid	0-no_evidence					Y	PCG-CDS-exon	N	Not tested: not intergenic	4
PID0333	Bai2015-hu	Asfla	Afl-milR-22		Contig_2.1:4389236-4389395:+	broad.fixed.aspergillus_flavus_2_contigs	JZDT01000079.1:49049-49200:-	GCA_000952835.1_ASM95283v1	gene, TE	GGAAGUUGAUCUUGAUUGUUGGA	FALSE	CUUAUACGGAGGAAGUUGAUCUUGAUUGUUGGAGUGGUGUUGUUGUUGUUGUUGUUUACCCUCCUAGUAAACUAGAUCAUGAUGAUAGUAGUGGCGUAUACUGCGCAUUCUUUAUUUAUUCUUCUCGAAUAGUCAUUGACGACAUCCAUUCUGGUAUGCU	..(((((((((((.((((.((.((((((((.(((.(((((((((((.(((...((((((.......))))))..))).)))))))))((((((.....))))))................)).))).))))))))..)))))).)))..))).)))))..	-38.2	[8, 32, 124, 150]	142	5 success	Coordinates	published		valid	0-no_evidence					Y	PCG-CDS-exon	N	Not tested: not intergenic	4
PID0334	Bai2015-hu	Asfla	Afl-milR-23		Contig_2.1:4439783-4440000:+	broad.fixed.aspergillus_flavus_2_contigs	JZDT01000407.1:420-621:+	GCA_000952835.1_ASM95283v1	gene, TE	GAGGGGAGAGGGGGCCGUUG	FALSE	UCUUUUUUCUGAGGGGAGAGGGGGCCGUUGAUGGAAUAUUAUCCCCUUGCCCUCCCCCACGGUAGUUAGGAUCUGGGCUGUUUUUAUGUCGAUUUCUAUCUUUAUUUAUUUAUCUUUAAAGAAACUUCUCCUAUGAACCUCUUUACGGAUUACAACAUCAGACAGUCCAUCACAAGAACUAAACCCCAAAUGGCCAAUUCUACCUCUCCUGUAAUGCA	..........((((((((((..(((((((..(((......((((..(((((.........)))))...)))).((((((((((..((((.(((....)))...........((((.((((((...(((......)))..)))))).))))....)))).))))))))))................))))))))))..)))).))))))..........	-52	[8, 29, 187, 209]	201	5 success	Coordinates	published		valid	0-no_evidence					Y	PCG-intron	N	Not tested: not intergenic	3
PID0335	Bai2015-hu	Asfla	Afl-milR-24		Contig_2.1:2187460-2187831:-	broad.fixed.aspergillus_flavus_2_contigs	JZDT01000457.1:2-175:-	GCA_000952835.1_ASM95283v1	gene, TE	UGGCUAUCGAUCGAUCGUCGGA	FALSE	CGAUGGUGGUUGGCUAUCGAUCGAUCGUCGGACUAUUGAUUUUUAGUGAAUGCCGCUGUUUUUCGAUUGAGAUGGACACUCGUUCCGUUGCUGACUCGUACGCUUUUUUCUAGAGACGGAGAAUAUUCUAUUUCAUUGAAAGAGUGACAGGGGUGGGACACCAAGGGAAAAGAAAAAAAAAAUAAAAUAAAAUAAAAAAUAAAAAAAAGGAAAAAAAGGUUUAGUCAGAGUAUUGAAUAACCACUUUCAUCUGGACUUUACGGGUCAGAUCGUCUAUCUUCCGUCGCUCAGCCCUUUGCCCUCUGUCGCUAGGGCGCAGCGUUGUGGUCUCCAGAACGUCGGUAUGAUCAACCACCUUACUCCCUGUAUCGC	....((((((((((((((((.((.((...((((((((((....(((((.....)))))....)))...((((((((((((((((((.(((((.((((.(.(((((((((...((((.(((......))).))))...)))))))))..).)))).))....))).)))...............................................(((((((((..(((((...........)))))...)))))))))))))))......)))))))))....((((..(((((..((........)).)))))..))))..)))))))...)).)))))))).).))))))))).(((.....)))....	-97.2	[8, 31, 327, 351]	343	5 success	Coordinates	published		valid	0-no_evidence					Y	none	Y	N	3
PID0336	Bai2015-hu	Asfla	Afl-milR-25		Contig_2.1:2831022-2831305:-	broad.fixed.aspergillus_flavus_2_contigs	JZDT01000021.1:7838-7982:-	GCA_000952835.1_ASM95283v1	gene, TE	GUGUAGGGUGUGGUAGUGCUC	FALSE	AUCCAUAUUGUCCGGGAAGACAAAGCCACGGGGGUGCAGUUGCGAGAUAUCUCUGAUAGGUUGUUUGCCUUUUCCGGUGCCGCAGGUUCCGUCGUCGGGGAGAUGCAAUUGGUCGGGGGAAUCCAGGUUGAGCAUGCUGGGGUCAAUGGUGGCGAGUCCCGGUGUUGGCGAGAAGAGGAGCAUGUCGAGGUCUUCUGGUGGAUCGUGGUUCUUGGAUGAGUGUCUGGGGGAUUCGUUUGAUGGGGAAGGGCCAGUGUAGGGUGUGGUAGUGCUCUCGUAUGGUG	..((((((...((((((((.(((((((.(((((((((........).))))))))...)))..)))).).))))))).(((...((((((.(((.(.((.........)).).))).))))))..))).((((((((((.(.((.(((.((((...((((.(((((.((.((((((..............)))))).)).)))((...(((((((((....)))))))))...))....)).))))...)))).))).)).).))))).)))))..))))))..	-90.2	[129, 150, 251, 273]	144	5 success	Coordinates	published		valid	0-no_evidence					Y	PCG-CDS-exon	N	Not tested: not intergenic	4
PID0337	Bai2015-hu	Asfla	Afl-milR-26		Contig_2.2:536673-536756:+	broad.fixed.aspergillus_flavus_2_contigs	JZDT01000367.1:3319-3378:+	GCA_000952835.1_ASM95283v1	gene, TE	CCUGUCUAUCGAGGAUUGUUGGA	FALSE	CCCUUUAGCGCCUGUCUAUCGAGGAUUGUUGGAGUAAGAAGUAGCGUCGAAGGUCGUUGAUGGCGGUGCUGCCAGACGGCGGGA	(((...((((((.(.(((((((.((((.((((.((........)).)))).)))).))))))))))))))(((....)))))).	-32.8	[8, 32, 45, 67]	59	5 success	Coordinates	published		valid	0-no_evidence					Y	PCG-UTR-exon	N	Not tested: not intergenic	3
PID0338	Bai2015-hu	Asfla	Afl-milR-27		Contig_2.2:2556773-2556852:+	broad.fixed.aspergillus_flavus_2_contigs	JZDT01000739.1:3792-3853:+	GCA_000952835.1_ASM95283v1	gene, TE	GGAUGAUAGGUCGGGAUGAGA	FALSE	CACGAUAUCGGGAUGAUAGGUCGGGAUGAGAGAUGACUCGACGCGGUACUUUCCCGGUCAUUUUAUCUAGAAGUUGAUGA	((((((.((.((((((...(((((((.(((...((........))...))))))))).)...)))))).)).)))).)).	-18.9	[8, 30, 47, 69]	61	5 success	Coordinates	published		valid	0-no_evidence					Y	PCG-UTR-exon	N	Not tested: not intergenic	3
PID0339	Bai2015-hu	Asfla	Afl-milR-28		-	broad.fixed.aspergillus_flavus_2_contigs	-	-	-	UAGCUAUCUCGUGACAGACAAU	-	-	-	-	-	-	5 success	Coordinates	published		secondary structure in duplex	-	-	-	-	-	-	not evaluated: hairpin invalid	-	-	-
PID0340	Bai2015-hu	Asfla	Afl-milR-29		Contig_2.2:540603-540704:-	broad.fixed.aspergillus_flavus_2_contigs	JZDT01000367.1:7133-7218:-	GCA_000952835.1_ASM95283v1	gene, TE	ACUCCUUGGGCGCAUCGUUGGA	FALSE	UACAGGGGGAACUCCUUGGGCGCAUCGUUGGACCCGGUAAUGGUACCGUUGUGGAAGACAAAACGCACAUUAAUCUCCGAUGCAUCGGGGAAUCCAUCUGCA	..((((.(((..(((((((..((((((..(((..(((((....))))).((((..........))))......))).)))))).))))))).))).))))..	-30.4	[8, 31, 73, 93]	85	5 success	Coordinates	published		valid	0-no_evidence					Y	PCG-CDS-exon	N	Not tested: not intergenic	4
PID0341	Bai2015-hu	Asfla	Afl-milR-30		Contig_2.2:3092232-3092323:-	broad.fixed.aspergillus_flavus_2_contigs	JZDT01000335.1:5192-5263:-	GCA_000952835.1_ASM95283v1	gene, TE	UUACUGUACAUAAGCUAGACA	FALSE	CUGUGUUUCUUUACUGUACAUAAGCUAGACAUCCAUUUCUUUUUCUUUUGUGCCAAAUGAGUUUGUAUGUGACAGUAAUCGGACUCGACAGA	((((((((..(((((((.((((.((.((((...(((((................))))).)))))).)))))))))))..))))...)))).	-18.8	[8, 30, 59, 79]	71	5 success	Coordinates	published		valid	0-no_evidence					Y	PCG-UTR-exon	N	Not tested: not intergenic	3
PID0342	Bai2015-hu	Asfla	Afl-milR-31		Contig_2.2:3211455-3211808:-	broad.fixed.aspergillus_flavus_2_contigs	JZDT01000002.1:22697-23029:+	GCA_000952835.1_ASM95283v1	gene, TE	CAAGGAUUGUGAUUGUUCUGGA	FALSE	CCCUAAGGGACAAGGAUUGUGAUUGUUCUGGAAAAUGUAAAGUUUCAUACUAUACCCACAUGGCUGACCGAUUGAAAAUUUUCUCAUCGAAUGAGAGGUUGACAUUCGUACAAGUACCUCUCGGGUGGAUCCAACGUCCAUAAUUAGCAGGCAACCAUUCCGUCUAGUUUUGGACCUCGAGCAUAGAAUAUCCAGACAUCUUUGCUAGAUACUCUAGAAUUUAGGUGUUAUACCGAGAAAGAAAUCGAGAAAAAGAACUUUUUAGGAACAUCAUCCUUUUAAGUUUCCUUGCAUUCUGUCCAAUGUAAAAAGAACAUCUUGCAGAAUGAUUCCUUGAUUAUUCUUAGUGCUGGU	..(((((((.((((((.....(((((((((.((.((((..(((.....))).(((((...........((((.(((....)))..))))...(((((((((((....)).))...))))))))))))........(((((.((((((..((........))..)))))).)))))(((((..............(((((((...(((((...))))).....)))))))...............))))).....((((((...((((......))))...))))))..(((((((......))))))).....)))).)).)))))))))))))))....))))))).......	-84.9	[8, 31, 319, 340]	332	5 success	Coordinates	published		valid	0-no_evidence					Y	none	Y	N	3
PID0343	Bai2015-hu	Asfla	Afl-milR-32		Contig_2.2:3899591-3899729:-	broad.fixed.aspergillus_flavus_2_contigs	JZDT01000735.1:6458-6580:-	GCA_000952835.1_ASM95283v1	gene, TE	CUUGUUCGUCGGGGGGAUGGCA	FALSE	GAGUGGUGAACUUGUUCGUCGGGGGGAUGGCAGGCUUCUCGAGGAAAACUUCUUUAAUGCGAACAUGGAGUUUGUUCCGCUUUGGUGCUUUUCGACCCUCUGCCUGUCUGGCCUUCUUCUGCUCAGGAGUUUCUGCUUC	((((((.((((((.(..((.((((((..(((((((...(((((((..(((........((((((.....))))))........)))..)))))))......)))))))...))))))...))..).)))))))))))).	-41.2	[8, 31, 104, 130]	122	5 success	Coordinates	published		valid	0-no_evidence					Y	PCG-CDS-exon	N	Not tested: not intergenic	4
PID0344	Bai2015-hu	Asfla	Afl-milR-33		Contig_2.3:1006044-1006329:-	broad.fixed.aspergillus_flavus_2_contigs	JZDT01000323.1:42316-42570:-	GCA_000952835.1_ASM95283v1	gene, TE	GGCGAGAUGGCCGAGCGGUC	FALSE	AGCUGCCUAUACAUAUAAUGAAAUCACUCGGGUUAUGUCCCUACUAGGUUAGAAAGGAGAUUCUCGAAGGAUUAAUUCAAUUUGAAAUGGAUAUCUAACUAAUUGGGCUCAUGGGAUAAAAAAAAAGAAAAGAUCUAGCAUAUGUACGAAUUGCCUGCACCGUAAACAUUUUACAUAUUUAGUCCUUUAGGAGACAAUGUGUAUAGUAAAGUUACUGCUGAAUAUAUGCAAAACAAAAAAAGCAAUUCAACCAAUAGGCGAGAUGGCCGAGCGGUCCAAGGCGGUU	.(((((((..........((..(((.(((((.((((.((((((...((((.(((..(....((((((((((((((.......(((((((..(((.....(((((.(((..(((((((...............))))..)))..)).).)))))........)))..))))))).....))))))))))..))))...((((((((....(((....)))...))))))))............)..)))))))..)))).)).))))))))).))).))))))))).	-58.8	[21, 42, 254, 275]	254	5 success	Coordinates	published		valid	0-no_evidence	RF00005	3.91e-10	tRNA	tRNA	Y	near-PCG	N	Not tested: not intergenic	4
PID0345	Bai2015-hu	Asfla	Afl-milR-34		Contig_2.4:2364608-2364713:-	broad.fixed.aspergillus_flavus_2_contigs	JZDT01000740.1:54847-54934:-	GCA_000952835.1_ASM95283v1	gene, TE	AAGGCGGACGUUGGCGGCUGAUA	FALSE	AUUACGAAACAAGGCGGACGUUGGCGGCUGAUAGAUAGCCAUAUGGGUUGGAAUUUACGUUAUCAGGUAUCUCAUUUUAUGCAGCGUCUUUUUCGUUUCUUGUGAA	.(((((((((.(((.((((((((.((...((((((((.((..((((((........)).))))..))))))).)))...)))))))))).))).)))))..)))).	-25.2	[8, 32, 71, 95]	87	5 success	Coordinates	published		valid	0-no_evidence					Y	none	Y	N	3
PID0346	Bai2015-hu	Asfla	Afl-milR-35		Contig_2.5:1356614-1356760:+	broad.fixed.aspergillus_flavus_2_contigs	JZDT01000350.1:83112-83232:+	GCA_000952835.1_ASM95283v1	gene, TE	GGCGGACUGCUUCAAACGACGGA	FALSE	GACCUCAAGGCCAGCAGCCUUAGCGGAGGCGGUCAAAGCCUCGCGCUGAGCAUCGGAGAAGUCAGUGGGGACAGUGAUGACGGCGGCAUUGACUUCCUUGCCCAGGUAGUCAGAGGCGGACUGCUUCAAACGACGGAGAUGGCGGGU	.((((....((((....((((....(((((((((...(((((((.(((.(((..((.((((((((((......((....)).....))))))))))))))).))))).....))))).)))))))))....)).))...))))))))	-54.6	[16, 41, 112, 136]	120	5 success	Coordinates	published		valid	0-no_evidence					Y	PCG-CDS-exon	N	Not tested: not intergenic	4
PID0347	Bai2015-hu	Asfla	Afl-milR-36		Contig_2.5:404010-404156:-	broad.fixed.aspergillus_flavus_2_contigs	JZDT01000219.1:4704-4835:-	GCA_000952835.1_ASM95283v1	gene, TE	ACUUUAGAUGGUCGUGUUGGGGA	FALSE	GGAAGGCGCAACUUUAGAUGGUCGUGUUGGGGAGACUGCAUAGCGAGCGUAGAGUUCAGAUCAACUUAAAGGAAUGAAUCAAAGGCUUCAAUUUCAGGGAAAUCCAGCUGGCAAAAUCUCCAGCCUUGUCUGAGGCAACUGCUGUUA	....((((...((((((((((..(.((((((((...(((.((((((((.....)))).............((((((((........))).)))))..((....)).)))))))...)))))))))))))))))))....))))....	-35.8	[8, 32, 116, 137]	129	5 success	Coordinates	published		valid	0-no_evidence					Y	PCG-intron	N	Not tested: not intergenic	3
PID0348	Bai2015-hu	Asfla	Afl-milR-37		-	broad.fixed.aspergillus_flavus_2_contigs	-	-	-	CAUUGUUUAAGCGUCGUUGGAA	-	-	-	-	-	-	5 success	Coordinates	published		secondary structure in duplex	-	-	-	-	-	-	not evaluated: hairpin invalid	-	-	-
PID0349	Bai2015-hu	Asfla	Afl-milR-38		Contig_2.5:1011682-1012010:-	broad.fixed.aspergillus_flavus_2_contigs	JZDT01000177.1:49197-49487:-	GCA_000952835.1_ASM95283v1	gene, TE	CCAUGGGAUUCUAAUCGUCGGA	FALSE	CCCAAGAGCACCAUGGGAUUCUAAUCGUCGGAGAAAAGUCGUGGCUACAUGUGAUGGAGCCGCCGGGUUAAUGAAGCUGAAACCCUAACCAAGGCGCCAAGCAUCAGGAGCUGGUCUAAGCAUAUCCACCGGCCACCGUCAUGUUUUAGAUCAAUUAAGGUGAAACUACUGGGCGCUUUGUCUCUUGUCGCUUUUAAUGAGCCCACCGAAAUCUAGUUCCACUAACUAUUGAUUUCUUGCUAAGCCCUUGCGACAAUGGCCUGGUCCAACGCCCUUCUCCGGUGGAGAGUCUCGGGGUAAUUGAUUCUAAAGGCUUCGGCCCUUCGGGA	((((((...(((.(((((((((..(((((((((((.....((((((.(((...))).)))))).(((((...........)))))....(((((((((.((((((..((..(((((((((.((((....(((...)))..))))))))))))).))..))))......)).)))))))))....(((((((........(((.....(((((((((((.....)))))..))))))..)))........))))))).(((.(......).))).)))))))))))))))))))).))).............(((....)))))).))).	-98.1	[8, 31, 277, 298]	290	5 success	Coordinates	published		valid	0-no_evidence					Y	none	Y	N	3
PID0350	Bai2015-hu	Asfla	Afl-milR-39		Contig_2.5:1840182-1840304:-	broad.fixed.aspergillus_flavus_2_contigs	JZDT01000298.1:104531-104637:-	GCA_000952835.1_ASM95283v1	gene, TE	GGUUUUGAUGAUCGUGUCGGA	FALSE	ACAACCUUUAGGUUUUGAUGAUCGUGUCGGAGUCUGGGAAGCAACCUACACACGGACCAAGCGUUGCUGUCAUGGAGGGUCGAGACCCAUACCUCCCACCAAUCGUCGUCACCUGAUGGGGAA	....((.((((((..(((((((.(.((.((((..((((...(.((((.(.((..(((..(((...)))))).))).)))).)...))))...)))).))).)))))))..)))))).))....	-38.2	[8, 30, 93, 114]	106	5 success	Coordinates	published		valid	0-no_evidence					Y	none	Y	N	3
PID0351	Bai2015-hu	Asfla	Afl-milR-40		-	broad.fixed.aspergillus_flavus_2_contigs	-	-	-	CCUAUCGGCAUUGUGAGACGGA	-	-	-	-	-	-	5 success	Coordinates	published		secondary structure in duplex	-	-	-	-	-	-	not evaluated: hairpin invalid	-	-	-
PID0352	Bai2015-hu	Asfla	Afl-milR-41		Contig_2.6:2344048-2344352:+	broad.fixed.aspergillus_flavus_2_contigs	JZDT01000908.1:41287-41573:-	GCA_000952835.1_ASM95283v1	gene, TE	GUCGUGGUAAGUGUGGCGUCGGA	FALSE	CACGGCCAGCUGAUGCGCUUCACGCGUGCUGUAGGUCGCUCCCAUGAAGAGAACAGCGGCCAGAAAAAUCGGGUCAAUGGUAUCUGGGUUGAAGGUUGGCUGAUGCACCAGAGGAUAUGUAACAUUGAAGCGAGUAAAGAAGAGAUCACAAUAGCCCUGGAGAGCCCCCAGGGUAAGCAGAGGCGAGUCCAGCGUCCUUGGACGGCCAUCAAUACCUAUCGGGGACACCUGCAUGACAAGAGAUAGGAUACCUCGCCGGCAAUUUUCUGACAGUCGUGGUAAGUGUGGCGUCGGACCGGGCCCUA	...((((.((((((((((((..((((.(((((.(((((((..............)))))))((((((.(((..((((((...(((((((...((.....))...)).)))))..........)))))).(((((...................(((((((.......))))))).....(((((..((((((.....)))))).))).))....(((((((((....)))...........))))))....))))))))...)))))).)))))))))..))))...))))))).)..))))...	-95.8	[8, 30, 270, 294]	286	5 success	Coordinates	published		valid	0-no_evidence					Y	PCG-CDS-exon	N	Not tested: not intergenic	4
PID0353	Bai2015-hu	Asfla	Afl-milR-42		Contig_2.6:136293-136561:-	broad.fixed.aspergillus_flavus_2_contigs	JZDT01000884.1:893-1117:+	GCA_000952835.1_ASM95283v1	gene, TE	GUUCUCAGCACGAUCGGCCGGA	FALSE	AGGCAGCACGUUGAAGGCCAAACUUGAACUAGUGCCUGGCCGCUUUGUACUGCGAACACUGCUCUGUCUCGAUCCGGAUGAGUGGCUACUCGGCACCGCGGGGUUUGCAGGACGGGCUGGAAGGCUGGAAACAUCGUCCAAGUAUUCAUCUCCGUCUGUACUAUUGAUUAACCACACCGAAGAAGACGUUGGUCUCUGACGGACAUGCGCCGCAGUAGGCCUAGAUGGCUCCGGAGUGUUCUCAGCACGAUCGGCCGGAGAAGCUGACC	.((((((..(((.(((......))).)))......(((((((..((((.(((.(((((((.(.((((...(((((.(.((.(((.(.....).)))))).))))).))))((((((...(((.((((((.......))).))).)))...))))))....((((((..........(((.(((.(((....))))))..)))..........))))))(((.....)))...).))))))).))).)))).)))))))....)))).))	-93.1	[34, 58, 235, 258]	224	5 success	Coordinates	published		valid	0-no_evidence					Y	PCG-CDS-exon	N	Not tested: not intergenic	4
PID0354	Bai2015-hu	Asfla	Afl-milR-43		Contig_2.6:599928-600128:-	broad.fixed.aspergillus_flavus_2_contigs	JZDT01000223.1:5784-5964:+	GCA_000952835.1_ASM95283v1	gene, TE	CCUAGGACAAGGGCGCACAGAGU	FALSE	CCGCCAGGGCACUCUCUGCGCUCUUGUCGUGGGUUACCUCUGCAGCUAGGGGACCGCUUGCGCGAUCGUCCAGCAGUGACAUCCCUUUCAUGCUAGCUGAUGAUUACAGUAUGGAUCUGUAUGUCACCAUUGCACGGCCGUGUAAGCGCCCUUUAGUUGCUUUUAUAACCUAGGACAAGGGCGCACAGAGUGCCCUGGCAG	..(((((((((((((.((((((((((((.(((((((.....(((((((((((..((((((((((.((((.(((..((((((((...((((((((.............))))))))...).)))))))..))).)))).)))))))))).))))))))))).....))))))).)))))))))))).)))))))))))))..	-118.3	[10, 34, 166, 190]	180	5 success	Coordinates	published		valid	0-no_evidence					Y	PCG-intron	N	Not tested: not intergenic	3
PID0355	Bai2015-hu	Asfla	Afl-milR-44		Contig_2.6:824273-824510:-	broad.fixed.aspergillus_flavus_2_contigs	JZDT01000689.1:227825-228019:+	GCA_000952835.1_ASM95283v1	gene, TE	GUAUCAAUGACAGAUCGUAAGGA	FALSE	AGCCAUCUGCAAUUGCGUAAACAUGGUGUUUGGUCCGUUAGGGUGGUUAUUUAUGUCUCUAUUCGACACCAGGUGCGUAACAUGACCGACUCCUGGAAUAUUAUAGACUAACCUCCUGUAUGGAGCCAGUGAGUUAUCGUCAACCUCUGGAGUCAUGAACUUGUCAUCAGGCAUAAAGGCUCGCUUCUGGGGAGCGAUUUCGAGAGUAUCAAUGACAGAUCGUAAGGACACAACUGGC	.(((((.(((......)))...)))))..(((((((.(((.(((.((((((.(((((((...(((...(((((.(((.....((((.(((((((((.....(((((.........))))).....)))).)))))...))))....((((.(.((......)).).))))((......)).))).)))))....)))....)))).))).))))))..))).))))))).))).....	-63	[33, 56, 203, 227]	194	5 success	Coordinates	published		valid	0-no_evidence					Y	PCG-CDS-exon	N	Not tested: not intergenic	4
PID0356	Bai2015-hu	Asfla	Afl-milR-45		Contig_2.6:1393835-1394132:-	broad.fixed.aspergillus_flavus_2_contigs	JZDT01000812.1:5384-5661:-	GCA_000952835.1_ASM95283v1	gene, TE	AGGCGACUGGUACAUGUAUGG	FALSE	UAUUGACUGAUCUUGCUCUUGUAUUCCAGUCGCUAACGAUUAUUCUUCCUUUGGCAGUCUCUCUUCCCGCCGAUUUCCUUGUCUGGAUUGCCUCUCCCGAAGCGGAGUUUCUCAAAGACAAAAUCGUCUUCGCCGCUUGGGACGUUGAUGAGCUCAAGGCUCGCCAGAAGGAGAUUGUCGGCGGCCCGCCGGGAACUGGUGAGCUCUGGCUUGGCUACCAAGGAUUCCCGCGAUUCAUCGCUGGCCAGCCUUUGCCAGGAACCCAGUAGGCGACUGGUACAUGUAUGGGAAGUCGCCC	...(((((..((.(((...((((..(((((((((.((........(((((..(((((..........((((((((((((..(((((...((((.((((.((((((.(.......(((((......)))))).)))))))))).(((....)))...))))...))))))))))...)))))))((.((((((...)))))).))...((((.(((((....((....))((((....))))))))))))).))))))))))....)).))))))))))))).))).))..)))))...	-108.7	[10, 36, 265, 287]	277	5 success	Coordinates	published		valid	0-no_evidence					Y	PCG-CDS-exon	N	Not tested: not intergenic	4
PID0357	Bai2015-hu	Asfla	Afl-milR-46		Contig_2.7:2051153-2051411:-	broad.fixed.aspergillus_flavus_2_contigs	JZDT01000923.1:13921-14166:+	GCA_000952835.1_ASM95283v1	gene, TE	AUGGCAUUGAAUCGGUCGGGA	FALSE	GUGGCCGUCGAUGGCAUUGAAUCGGUCGGGACGGUUCAGAGUUAUAUAUGCGAUCUUGCCGUCUGGGGACUUUUCGUAGAGUAUCGUCUUGAAUGAGUUUGCUUCCAUUUUCGGAGAAUGUUGGUUGUAGUGUCGUAUAAAUCUAGUUAUUGGAGAUACAAAAGGUAAAGAUUACAAUAUAACUUCGCCUAUGGGUUGCUUCAACCUCGGCUCGGAUGUUAGAGCUGGUGAUCCCCGCAGAUGUCAUAGCCAAGGCCAA	.(((((.....((((..((((((.(.((((..(((...(((((((((.((.(((((((((....(.((((((((((.(((......))))))).)))))).)((((......))))........(((((.(.((..((((......))))..)).))))))..))).)))))).))))))))))).)))...((((((...))))))((((((........))))))......))))).))).)))..)))).))))).	-74.4	[8, 30, 232, 254]	246	5 success	Coordinates	published		valid	0-no_evidence					Y	PCG-CDS-exon	N	Not tested: not intergenic	4
PID0358	Bai2015-hu	Asfla	Afl-milR-47		Contig_2.7:2250557-2250654:-	broad.fixed.aspergillus_flavus_2_contigs	JZDT01000855.1:29808-29864:-	GCA_000952835.1_ASM95283v1	gene, TE	AUGUAGUACUGCAUCGUUCUGGA	FALSE	UCAUUCGGCAAUGUAGUACUGCAUCGUUCUGGAAUGACCGGGGCGCGUGCCGUGCAUUCCAUCAGCCAACUCCAUUCCCAGCGAGAUCUGUAGGAUGU	......(((.(((..((((.((((((((((((.....)))))))).)))).))))....)))..))).....(((((.(((......)))..))))).	-27.9	[8, 32, 36, 64]	56	5 success	Coordinates	published		valid	0-no_evidence					Y	none	Y	N	3
PID0359	Bai2015-hu	Asfla	Afl-milR-48		-	broad.fixed.aspergillus_flavus_2_contigs	-	-	-	UGGGUGGUGGGGUGGCGAUGGCU	-	-	-	-	-	-	5 success	Coordinates	published		secondary structure in duplex	-	-	-	-	-	-	not evaluated: hairpin invalid	-	-	-
PID0360	Bai2015-hu	Asfla	Afl-milR-49		-	broad.fixed.aspergillus_flavus_2_contigs	-	-	-	AGGGGUAGUGGAGGAUGAGGAA	-	-	-	-	-	-	5 success	Coordinates	published		secondary structure in duplex	-	-	-	-	-	-	not evaluated: hairpin invalid	-	-	-
PID0361	Bai2015-hu	Asfla	Afl-milR-50		Contig_2.13:499551-499716:+	broad.fixed.aspergillus_flavus_2_contigs	JZDT01000567.1:20680-20733:-	GCA_000952835.1_ASM95283v1	gene, TE	GGCGUAUAAAGGAAUGUGCUCUU	FALSE	UGGAUGACUCAUAGACUUACAUAUAGCUUCUGUUCUGCAUAUUUAUUUUUCUGACCCUUUGUCCAUCUUCACGUCCGCGAAGAUCAAAAGUUUUCCAGGCUCAGGGUUAUAUUCUGUAUUGUUAUUUAUAUUGGGCGUAUAAAGGAAUGUGCUCUUGAGUUAAUAU	((((.((((((.(((..((.((((.((.........)))))).))..))).))....((((...((((((.(....).)))))))))))))).))))(((((((((.((((((((.(((((((..........)))).)))..)))))))).))))))))).....	-32.1	[102, 124, 131, 155]	53	5 success	Coordinates	published		valid	0-no_evidence					Y	PCG-UTR-exon	N	Not tested: not intergenic	3
PID0362	Bai2015-hu	Asfla	Afl-milR-51		-	broad.fixed.aspergillus_flavus_2_contigs	-	-	-	AGAUGUUGACGAGAGUGGGAU	-	-	-	-	-	-	5 success	Coordinates	published		secondary structure in duplex	-	-	-	-	-	-	not evaluated: hairpin invalid	-	-	-
PID0363	Bai2015-hu	Asfla	Afl-milR-52		Contig_2.14:1775258-1775459:-	broad.fixed.aspergillus_flavus_2_contigs	JZDT01000761.1:27718-27903:-	GCA_000952835.1_ASM95283v1	gene, TE	UGGGAACUCUUCAAUCAGAAUGA	FALSE	GCAAGAGAGUUGGGAACUCUUCAAUCAGAAUGAUGCGCUGGCGAUGGUAGCGAUUGGAGUCCUGUGGGAAUUCAGUGAGCUCGUCUAAAUCAAGCUUUCUAAACUGAUCACCGCGGCCUAGGAAUUCUUCAAAUUGAGCAGCAACAGAUACAUAUGCUUUUGUAGCGAACUCUGAGACCGGGGGGUUCUUCCACUCGAGUAU	......((((.(((((((((((..(((((......(((((.(...).))))).((((((((((((((....((((((((((.(.......).))))).....)))))...)))).....))))...))))))........((.(((((..(....)..))))).))....)))))....)))))))))))..))))......	-52.5	[8, 32, 166, 193]	185	5 success	Coordinates	published		valid	0-no_evidence					Y	PCG-CDS-exon	N	Not tested: not intergenic	4
PID0364	Bai2015-hu	Asfla	Afl-milR-53		Contig_2.16:147696-147952:-	broad.fixed.aspergillus_flavus_2_contigs	JZDT01000162.1:5242-5477:+	GCA_000952835.1_ASM95283v1	gene, TE	AAGAAAGGACGGAAGAGCAGG	FALSE	GGGUUUUGGGUUUAUGCCUAUUUCUAUUUUUUUUUUUUUUUCCCAUUUAUUGAUCGAUGUUUCCCUUUUAUUUUUAUUUUUUUUUUUUCCUGGAUCUUUUGAUGAUGGCAUGAUCUCUUCAUGACCAGGCCCAUGACGUCAUGACCCAUGCCAGCCCACCAAAGGGUGUAAAAUACAAUACCAUCCUGGGUGAGAGGGAAGGAGAGAACUAAGAAACAAAACAAGAAAGAAAGGACGGAAGAGCAGGAACCUGACAA	.....((((((((.(((...(((((.(((((((((((((....((((........))))...........((((((.((((((((((((((..(((....)))..(((((((......(((((((((......))..)))))))..)))))))...((((..((((((((........)).)))))).))))..)))))))))))))).)))))).......))))))))))))).))))).))).))))))))...	-63.8	[12, 36, 224, 246]	234	5 success	Coordinates	published		valid	0-no_evidence					Y	none	Y	N	3
PID0365	Bai2015-hu	Asfla	Afl-milR-54		Contig_2.1:2168133-2168225:+	broad.fixed.aspergillus_flavus_2_contigs	JZDT01000337.1:2902-2978:+	GCA_000952835.1_ASM95283v1	gene, TE	UUGCAGAAGUCGGAUAGUGGAUG	FALSE	ACUCGUGAGGUUGCAGAAGUCGGAUAGUGGAUGCCCCACCGUAGCCAUCUCCCAGUCCAGUAUACCGAUGACGCGGGGUUCAGUCUUAUGGAA	..((((((((((((.(..((((((((.(((((......................))))).))).)))))..))))).......))))))))..	-22.2	[8, 32, 53, 84]	76	5 success	Coordinates	published		valid	0-no_evidence					Y	PCG-CDS-exon	N	Not tested: not intergenic	4
PID0366	Bai2015-hu	Asfla	Afl-milR-55		Contig_2.1:959859-959951:-	broad.fixed.aspergillus_flavus_2_contigs	JZDT01000870.1:57850-57903:-	GCA_000952835.1_ASM95283v1	gene, TE	GGCCGAGGCUGAUACAUGCGU	FALSE	UGGGUGGCGGUGUUUUCCUACCAACACCUUCAGGUAAGUGUCAGGCUUCUGCAACCUCUCUGGGCCGAGGCUGAUACAUGCGUAGUUGUGCCC	.(((((..((((......))))..)))))..(.(((.(((((((.((((.((..((.....)))).))))))))))).))).)..........	-30.7	[31, 56, 60, 82]	51	5 success	Coordinates	published		valid	0-no_evidence					Y	PCG-intron	N	Not tested: not intergenic	3
PID0367	Bai2015-hu	Asfla	Afl-milR-56		-	broad.fixed.aspergillus_flavus_2_contigs	-	-	-	UGGUUGGACUUGCUUUAGGCAU	-	-	-	-	-	-	5 success	Coordinates	published		secondary structure in duplex	-	-	-	-	-	-	not evaluated: hairpin invalid	-	-	-
PID0368	Bai2015-hu	Asfla	Afl-milR-57		Contig_2.2:1357352-1357536:-	broad.fixed.aspergillus_flavus_2_contigs	JZDT01000839.1:6810-6970:-	GCA_000952835.1_ASM95283v1	gene, TE	CGGCACGGAGAUUGGGGGUCA	FALSE	GUACUUCAAACUAAUUUCCCCCAGUCCCUUCGUGCAGCGUGUAUGGAUAGCCUUGGAGGCCAAGGGCAUUCCGUAUCAGUAUAUCGAGGUAGACCCCUACAAAAAGCCUCAGUCCCUAUUGGAGGUGAACCCAAGGGGCCUUGUCCCUGCCCUGCGGCACGGAGAUUGGGGGUCACAUGAAAGUA	.(((((((.........(((((((((..(((((((.(((.(((((((...((((((...))))))....)))))))(((.....(((((....(((((.......(((((...........))))).......))))))))))...)))...))).)))))))))))))))).....)).)))))	-64.6	[14, 38, 152, 174]	160	5 success	Coordinates	published		valid	0-no_evidence					Y	PCG-CDS-exon	N	Not tested: not intergenic	4
PID0369	Bai2015-hu	Asfla	Afl-milR-58		Contig_2.4:309280-309610:-	broad.fixed.aspergillus_flavus_2_contigs	JZDT01000523.1:22813-23048:+	GCA_000952835.1_ASM95283v1	gene, TE	AGCGGUCUAAGGCGCACGGUUC	FALSE	AAGGUUCACCGAUGGCAGUGUCUCAGAUACAACCGGACGUUGUGGGAGAGGGAGCAGGAAAAAAGAAAAAAAAAAAAAAAAAAAAAAAAAAAGGCAGAACACCAGCGCCGAAUGGAUGAGCGAGCCACAAGGAGUGUGGGUGAAGAGCCCAUAGAGCAAGACAAUCCAGAGGAAGCAGCUUUAGAAGGAGAGGAUACGCAGAGAGGCAGGACGGGAAUGUGCAAGGGUAUGAGAGUAUAUUUAACUACUAUCUAGAUUAUAUGAUUUGACAUAACACACAUCAAUCGGCAAGGUGGCCGAGCGGUCUAAGGCGCACGGUUCAGGUUAACCU	.(((((.(((....((..(.((((...((((((.....)))))).)))).)..)).........................................((((.(..(((((...((((((..((.(((((..(...(((((((.....)))))))...)....(..(((....((((...))))....)))..).....((......))....(((..(((((......((((.((((.(((.((((((.....))).))).)))))))..))))...)))))...))).....)))))))..).))))).)))))..))))).))).)))))	-71.8	[96, 121, 297, 320]	224	5 success	Coordinates	published		valid	0-no_evidence	RF00005	1.47e-18	tRNA	tRNA	Y	none	Y	N	4
PID0370	Bai2015-hu	Asfla	Afl-milR-59		Contig_2.4:705224-705343:-	broad.fixed.aspergillus_flavus_2_contigs	JZDT01000849.1:35306-35416:-	GCA_000952835.1_ASM95283v1	gene, TE	AGCAUGUUAAUUCAGGGGAA	FALSE	CAUCCAUCACAGCAUGUUAAUUCAGGGGAAGAAUGCCAGGCUCAUAACCUGGAAGUCGCUGGAUAAAACAGCACAUGCUACGCGUUAUUUUGUGAAAUUUUUUUUAGUUAUCUGGUGUGU	.......((((.((.(.(((((.(((((((((...(((((.......)))))...))((((.......))))........((((......))))...))))))).))))).))).)))).	-25.5	[8, 29, 97, 117]	109	5 success	Coordinates	published		valid	0-no_evidence	RF00005	1.07e-32	tRNA	tRNA	Y	none	Y	N	4
PID0371	Bai2015-hu	Asfla	Afl-milR-60		Contig_2.5:2499945-2500198:+	broad.fixed.aspergillus_flavus_2_contigs	JZDT01000270.1:1738-1972:+	GCA_000952835.1_ASM95283v1	gene, TE	UAACUCGGUGGAUUAUGGCAG	FALSE	AGGAUUGCUCUGCGCAUGAUCGAAGAGGCCGAACGAUCAGGGCGCAUAAAGCCUGGUGAUACUCUCAUCGAACCCACUAGCGGUAACACGUAUGCCUAUCAACAAACUUGUUGGUUCCUAUAUAACAUUUUUUGCUAAUCGCUAAAUCAGUGGAAUUGGUUUGGCGCUCGUCGGCGCUGUAAAGGGUAGGCCAUCGUCUGCUGAAUGAUAUAUGCUGGAUUGUUAACUCGGUGGAUUAUGGCAGGAUACAAGAC	.(..(((.(((((.(((((((.(.(((....(((((((.((((.......))))(((((.....)))))........((((((......(((((...(((((((....)))))))...)))))........))))))..((((((((((((...)))))))))))).....(((((.((((...(((((((....)))))))......))))))))))))))))..)))..).))))))))))))...)))..)	-73.6	[9, 33, 221, 243]	234	5 success	Coordinates	published		valid	0-no_evidence					Y	PCG-CDS-exon	N	Not tested: not intergenic	4
PID0372	Bai2015-hu	Asfla	Afl-milR-61		Contig_2.5:1550820-1550950:-	broad.fixed.aspergillus_flavus_2_contigs	JZDT01000548.1:83927-84041:-	GCA_000952835.1_ASM95283v1	gene, TE	ACUGGGGGUAGAGUUCACGGUA	FALSE	ACAGAGUUGGACUGGGGGUAGAGUUCACGGUAUCCCGAUCAUCGAUUGCAGAACGAGAAAAACCUUUUCGCCGGCUGGUCUUUUGACGAACAGGCAAGCGUGAUACGUGUGCUCUCGACUGCCAAUUCCCA	...(((((((..((((((((.((((((((.(..((.(.((.((((...(((..((((((.....))))))....))).....)))).)).).))..).))))).)).).))))))))....)))))))...	-37.1	[8, 31, 95, 122]	114	5 success	Coordinates	published		valid	0-no_evidence					Y	PCG-UTR-exon	N	Not tested: not intergenic	3
PID0373	Bai2015-hu	Asfla	Afl-milR-62		Contig_2.6:599933-600124:-	broad.fixed.aspergillus_flavus_2_contigs	JZDT01000223.1:5789-5959:+	GCA_000952835.1_ASM95283v1	gene, TE	AACCUAGGACAAGGGCGCAC	FALSE	CAGGGCACUCUCUGCGCUCUUGUCGUGGGUUACCUCUGCAGCUAGGGGACCGCUUGCGCGAUCGUCCAGCAGUGACAUCCCUUUCAUGCUAGCUGAUGAUUACAGUAUGGAUCUGUAUGUCACCAUUGCACGGCCGUGUAAGCGCCCUUUAGUUGCUUUUAUAACCUAGGACAAGGGCGCACAGAGUGCCCU	.((((((((((.((((((((((((.(((((((.....(((((((((((..((((((((((.((((.(((..((((((((...((((((((.............))))))))...).)))))))..))).)))).)))))))))).))))))))))).....))))))).)))))))))))).))))))))))	-107.8	[11, 32, 160, 181]	170	5 success	Coordinates	published		valid	0-no_evidence					Y	PCG-intron	N	Not tested: not intergenic	3
PID0374	Bai2015-hu	Asfla	Afl-milR-63		Contig_2.6:1003956-1004294:-	broad.fixed.aspergillus_flavus_2_contigs	JZDT01000689.1:44423-44740:+	GCA_000952835.1_ASM95283v1	gene, TE	GUGGGUUGGUUGUGGGUGGUU	FALSE	CGAUUGCCUCGUGGGUUGGUUGUGGGUGGUUUGAGGAGAAGUAUGUAUGGUGGAUGGAUGGGUUCGGAGAUGCGGAUCGAGGGUUGAUGUUGAUGCCUUAGGUGUCUUUGGUGGAUGCCGAGGUUUCAUGGAGCCUGAGGUGUCUGUUUCUGCUGGUUUUCUUAUUUCCAAAUACCUAGGAGUUUUUACUGUGUUGCUUCAUUGACGAUGGUGGAUAAUAAGUAAUAAUGACAUUCAAGUCUAGAUACUAAGCAUCUAUUCUUAACCUGUCCUUCAAAUCCAAGCUCUAUAUAUCCCAUCCAGAGCUCACGCUAACCGUCCUAUUCAACAUGGCACCAA	....((((..(((((.((((((.(.(((((((..(((...(.((((((((((((((((((((((.(((((((((((((.(((.((((((((((((((((((((..(((((((....))))))).........)))))))))))).....((.(((((................))).)).)).........((((((((.(((.((....)).)))...))))))))..)))).)))).))).))).))..)))))...))).))))))))).....)))))....)))))))))...))).)))).))).))))))).))))).......))))....	-103.9	[8, 30, 303, 325]	317	5 success	Coordinates	published		valid	0-no_evidence					Y	near-PCG	N	Not tested: not intergenic	3
PID0375	Bai2015-hu	Asfla	Afl-milR-64		Contig_2.7:1563388-1563499:+	broad.fixed.aspergillus_flavus_2_contigs	JZDT01000434.1:4483-4584:+	GCA_000952835.1_ASM95283v1	gene, TE	UAGGUCUGGUCCUUGUGCGGUUU	FALSE	CCGCAUGGUGGUCAGCUUUUGCAUAAGGUCUCGUGCCUUCUUCUCCUCUCCUCCAAGGACAACAGCCCGCUUUUGCAUAUAGGUCUGGUCCUUGUGCGGUUUCAUCUUGGUG	((((((((.(((((((((.((((.(((((...(.((.......((((........)))).....))).)))))))))...))).)))).)))))))))).............	-26.6	[0, 20, 77, 101]	101	5 success	Coordinates	published		valid	0-no_evidence					Y	PCG-CDS-exon	N	Not tested: not intergenic	4
PID0376	Bai2015-hu	Asfla	Afl-milR-65		Contig_2.7:1910250-1910396:-	broad.fixed.aspergillus_flavus_2_contigs	JZDT01000491.1:12236-12352:+	GCA_000952835.1_ASM95283v1	gene, TE	UGAAGAAGUAGACACCAGGCGUU	FALSE	UCUUCUUUCGUGAAGAAGUAGACACCAGGCGUUUCUUCAUGUGCUUUGGCAUCUUGUUCGCACGUUUUUCACGCUUCUCCUCCUUCACCUUCUGCUUGUGAUCGCGCUUGGUGUCUUUGUCAACGAAACGCUUCCCGCGCGGGACCC	.....((((((...((...(((((((((((((......((((((...((((...)))).))))))...((((((...................))..))))..)))))))))))))...)).))))))....((((....))))...	-41.7	[8, 32, 102, 124]	116	5 success	Coordinates	published		valid	0-no_evidence					Y	PCG-CDS-exon	N	Not tested: not intergenic	4
PID0377	Bai2015-hu	Asfla	Afl-milR-66		Contig_2.9:1558177-1558360:-	broad.fixed.aspergillus_flavus_2_contigs	JZDT01000236.1:36403-36558:+	GCA_000952835.1_ASM95283v1	gene, TE	AGGAUCUGAGACUGGCCGCGU	FALSE	UCACUGGGGGAGGAUCUGAGACUGGCCGCGUUGCCACUCCAGGCCUGAAGUGGAAACAUUGGUAUCGCUGAUGAUCUGGUGUACUUCAUUGUGUGUGAAUGAUGGAUGGAGAGAUGAGGUUAGAAGUCAAAGCGGCAGUGAUGGUCAGUUGUAGUAGGUUGAGCUCCAAUAUAGGAAGAGUGGA	(((((((((...((((((.((((((((((((((((.((....(((...((((....)))))))...(((..((((((.((.(.(((((((..((.......)).)))))))).)).))))))..)))...)).))))))).)))))))))....))))))...))))...........))))).	-52	[8, 30, 137, 163]	155	5 success	Coordinates	published		valid	0-no_evidence					Y	PCG-CDS-exon	N	Not tested: not intergenic	4
PID0378	Bai2015-hu	Asfla	Afl-milR-67		Contig_2.10:788044-788215:+	broad.fixed.aspergillus_flavus_2_contigs	JZDT01000684.1:28292-28406:+	GCA_000952835.1_ASM95283v1	gene, TE	GCGGGUGGGCGGGCCUGGUG	FALSE	UGCGAGUGAGGUCAGUUUCAGGGAUGGCAUUCAUUCGACCAGAAGCACCGCUGUUCGCUCGUUCCCAGAGGAGGAUACGCAGCCACGUUCUCUCUCUAUUGCGAGUUAGUCGCUCGCGGCGUGUUUGGUCCUCAAUGUCAUGGCGGGUGGGCGGGCCUGGUGUGCGCUUGGG	..((((((((((((..........)))).)))))))).((((..((((.((((((((((((((((((((.((((((...(((.(((((...........(((((((.....)))))))))))).)))))))))....)).))).))))))))))))..)))))))..)))).	-63.5	[47, 66, 140, 161]	114	5 success	Coordinates	published		valid	0-no_evidence					Y	PCG-CDS-exon	N	Not tested: not intergenic	4
PID0379	Bai2015-hu	Asfla	Afl-milR-68		Contig_2.10:1122617-1122763:-	broad.fixed.aspergillus_flavus_2_contigs	JZDT01000857.1:4334-4360:+	GCA_000952835.1_ASM95283v1	gene, TE	UCAAUUGCCCGGAUGGUCUAGU	FALSE	UACAAAGACUACAAGACUAUUAGUGGUGAAAGAUUAAGCAGGGCUUUGGAUGUCAACGCAAAGCAGGGAGAUGAGAUGCCCUUUCUCAUGUAAACAUAAAUCAUUAUCUGUUACAUCAAUUGCCCGGAUGGUCUAGUGGUAUGAUUC	.......(((((.((((((((.(.(((((..(((..((((((((((((..........))))))....(.((((((.......)))))).)...............))))))..)))..)))))).)))))))).))))).......	-38.3	[10, 34, 113, 136]	126	5 success	Coordinates	published		valid	0-no_evidence					Y	none	Y	N	3
PID0380	Bai2015-hu	Asfla	Afl-milR-69		Contig_2.10:2003252-2003533:-	broad.fixed.aspergillus_flavus_2_contigs	JZDT01000454.1:8883-9145:+	GCA_000952835.1_ASM95283v1	gene, TE	GGAUGGGCGUAAGAUCUACU	FALSE	GUCAUGUGAAUAGAUCGCUGCGCACGUCUUUGGCAGGUCUUUGGCCUGGCACUAACUAGUAAUAAUGUAUGGAGCGGUGAGGGGAGCGGUGUAUUUUGGCUUGUCAGUACCUUAAUUAGGUGUAGCUAUCCCUUUGGUGCGGCAAAGGUAUGUACAUUUAGAUAUGUUAGUAGUAUGUGAGAUCUCCCCCGUGGCUUAUUUCUUAUUGCGUGCUCUGUACAAUAGUAGUAGUAGACACAUACUUGAAAGGCAGGAUGGGCGUAAGAUCUACUUUAUGCUGAA	.(((((((((((((((..(((((.((((((((.((((((...)))))).))(((.(((.((.((.((((((((((((((.((.((((.(.......).)))).))..)))).....((((((((..((..((((((......))))))))..))))))))...((((.(((((...(((((.((........)))))))...))))))))))))))))))).)).)).)))))).................)))))).))))).)))))).)))))).))).	-81.5	[9, 30, 250, 271]	262	5 success	Coordinates	published		valid	0-no_evidence					Y	none	Y	N	3
PID0381	Bai2015-hu	Asfla	Afl-milR-70		Contig_2.11:86936-87061:-	broad.fixed.aspergillus_flavus_2_contigs	JZDT01000594.1:88252-88340:-	GCA_000952835.1_ASM95283v1	gene, TE	UCCGUAGAGCUUGCCGGAGGGA	FALSE	CGCGUCCUUUUCCGUAGAGCUUGCCGGAGGGAUUUCUCCACGUGCUUCUUGUUGUGCCGCUUCAUAUUCGAAUGAUCUCUCUAGGCCUUGGCGGACUAGCUUGCAAAACGCACAGUCUGACGACGA	((((((....(((((.(((...((((((((((((..((((((.((.....)))))).............))..))))))))).)))))).)))))...((((((.....))).)))..)))).)).	-31.8	[8, 31, 75, 96]	88	5 success	Coordinates	published		valid	0-no_evidence					Y	PCG-CDS-exon	N	Not tested: not intergenic	4
PID0382	Bai2015-hu	Asfla	Afl-milR-71		-	broad.fixed.aspergillus_flavus_2_contigs	-	-	-	UGGCGACUUGUGAACGGAGCAGC	-	-	-	-	-	-	5 success	Coordinates	published		secondary structure in duplex	-	-	-	-	-	-	not evaluated: hairpin invalid	-	-	-
PID0383	Bai2015-hu	Asfla	Afl-milR-72		Contig_2.12:342352-342516:-	broad.fixed.aspergillus_flavus_2_contigs	JZDT01000888.1:21308-21454:+	GCA_000952835.1_ASM95283v1	gene, TE	UGAUGGAAGGAUGGUGUUGA	FALSE	CUGCGCGUUUAAUCCACAGCCUCCGUCAACGAUCCAUUGACCCCUCAACAGUUGGUCAUUCCAGAAUCUCUCCUUGGCGGGAAAUGAAAAGUGGGCAUGGUCUUCGACCCCCCGAUCAAGGGACCACCCCCAUCGUGAUGGAAGGAUGGUGUUGAUGAUGCGUAU	.(((((((((((((((...(((((((((.((...((((..((((.......((((.....))))...........)).))..))))....(((((..(((((((((......))).....))))))..))))))))))))).))).))).))))..)))))))).	-50	[8, 30, 133, 154]	146	5 success	Coordinates	published		valid	0-no_evidence					Y	PCG-UTR-exon	N	Not tested: not intergenic	3
PID0384	Bai2015-hu	Asfla	Afl-milR-73		Contig_2.12:525223-525403:-	broad.fixed.aspergillus_flavus_2_contigs	JZDT01000096.1:347-514:-	GCA_000952835.1_ASM95283v1	gene, TE	UGGGUUUAUGGGUAGGUUGGGG	FALSE	ACGCCCUCUUCCUCGCCGAUACCUAUGGCGGAUACGAUACCUACGAAGGCAGCUUAGACGAAUGUAUUCGGCGCGCGGCGCAGUGGCCGGUUACGGAUCCUACUAUUGUAUGUCCUUCCUUUUCUCUCUAUCUUAUCUGUCUGGUAUUAUGGGUUUAUGGGUAGGUUGGGGUAGACAGUAC	..((((.(..(((.(((.((((((((((((((((.((((.....(((((.((.....((((..(((((((..((.((((......))))))..))))...)))..)))).....)).)))))......)))).)))))))).......))))))..)).))))))..))))).........	-53.6	[3, 26, 147, 170]	167	5 success	Coordinates	published		valid	0-no_evidence					Y	PCG-CDS-exon	N	Not tested: not intergenic	4
PID0385	Bai2015-hu	Asfla	Afl-milR-74		Contig_2.13:335428-335560:+	broad.fixed.aspergillus_flavus_2_contigs	JZDT01000168.1:87523-87623:-	GCA_000952835.1_ASM95283v1	gene, TE	UGGGGAGGGUUUCAGGGAGUGGA	FALSE	UUGUUUGUUUUGGGGAGGGUUUCAGGGAGUGGAUGUUUAGGAUUAGAUGGGAAAGGCUAAUUGGGUAUUUUAGAAAUCUUGAACUUCCUCCUGGGAGUGCUCACUCAGGGUGAGACUCAGCUGGAUCAGGCUC	..((((.((((((((((.(((((.(((((.(((.((((((((((...(((((...(((.....))).)))))..)))))))))))))))))).))))).))).)))))))..))))..((((......)))).	-38.7	[8, 32, 84, 108]	100	5 success	Coordinates	published		valid	0-no_evidence					Y	PCG-CDS-exon	N	Not tested: not intergenic	4
PID0386	Bai2015-hu	Asfla	Afl-milR-75		Contig_2.13:610325-610537:+	broad.fixed.aspergillus_flavus_2_contigs	JZDT01000027.1:10493-10689:+	GCA_000952835.1_ASM95283v1	gene, TE	CGGGUAGCGGGUCGGGCGGGC	FALSE	UCCUCCACUCCGGGUAGCGGGUCGGGCGGGCUCGAGCCUUGGAUCGAGAAAUGGUUUUACAGUGGACGCGGUUGACAGGGCCAGUAUGGAGAAGAGAGUGGAUGAACUAGUUCGUAGUACGCACUGUAGUGUCAGCGUAGUAUUCCUUAGUGUCAGCGGUCAGAACGAAUUAGUGCCCAAAGCCCGCCACGCAUUCCUGCCCAACAGCAUCGU	...........((((((.((((((((((((((.(((((..............)))))....((.(((...))).)).((((.(.((.........((.((..((((((((...(((.(((((((......))..))))).)))...))))).))).)).)).........)).)))))..)))))))).)).))))))))))...........	-62.2	[8, 30, 181, 204]	196	5 success	Coordinates	published		valid	0-no_evidence					Y	none	Y	N	3
PID0387	Bai2015-hu	Asfla	Afl-milR-76		Contig_2.13:728007-728335:+	broad.fixed.aspergillus_flavus_2_contigs	JZDT01000809.1:8078-8389:+	GCA_000952835.1_ASM95283v1	gene, TE	AGAUGAGAAGGAGAGCGAAGCA	FALSE	AAGUGAGGCGAGAUGAGAAGGAGAGCGAAGCAUACGUCGCAGCUAAAACGACAGAAGACUGCAGGAAGCAAGACGUUAGGGGGAGGUGAUCGAUGUGCAGCUCCAAAUCCAAAGAGAGGUCAAGUUUCGUGCCGUAGAUUAUCACGUGAGGUGAAUAUACAGAUCGGGAUUAGUUUGUGAUCGGCAUCGGGAGCCUAAGGAACGCAGGAUGUAAACAAACAUGCGGGCCCAAUCGUGCAUGGAGCAAGUGGUCAGUGACCUAGUCCUGUCUGUAUCCAGGGACCUGCCACUUGCGGCUUUGCUGCAGCUUGCUUAUUACCUCUUUACCU	....((((...(((((((((..(((((((((....((((.........)))).....((.(((.(((((..(((.((.(((((((.((..(...)..)).))))...))).....)).)))..))))).))).))......((((.....)))).......(((((.((.....)).))))).((((((.(..((...))..).)..))))).......((((((.(......).))))))..((((((((.(((.......(((((...........)))))))))))))))).)))))))).)..))).)))))).)))).......	-99.9	[8, 31, 294, 319]	311	5 success	Coordinates	published		valid	0-no_evidence					Y	none	Y	N	3
PID0388	Bai2015-hu	Asfla	Afl-milR-77		-	broad.fixed.aspergillus_flavus_2_contigs	-	-	-	UUGGCUGUAUGAUGGAGGUUU	-	-	-	-	-	-	5 success	Coordinates	published		secondary structure in duplex	-	-	-	-	-	-	not evaluated: hairpin invalid	-	-	-
PID0389	Bai2015-hu	Asfla	Afl-milR-78		-	broad.fixed.aspergillus_flavus_2_contigs	-	-	-	CUGGGGAGGAGAGGGUGAUGUUA	-	-	-	-	-	-	5 success	Coordinates	published		secondary structure in duplex	-	-	-	-	-	-	not evaluated: hairpin invalid	-	-	-
PID0390	Bai2015-hu	Asfla	Afl-milR-79		Contig_2.16:305321-305448:+	broad.fixed.aspergillus_flavus_2_contigs	JZDT01000767.1:46036-46148:-	GCA_000952835.1_ASM95283v1	gene, TE	AGAUAGAGGAUGAAAGUAGGC	FALSE	GAACUAGGAGAGAUAGAGGAUGAAAGUAGGCCUGACAGCCUGUUUUGCUUUAUUUUUACUUUACUUUAUUUCCACUUUUUUUCUUUCUUUUUGGCGCCCUUUUUCUUCCUUCGGUUUCCUGUGGUUCA	((((((.(.(((((.(((((.(((((..(((......(((....................................................))))))..))))).)))))..))))).).)))))).	-26.61	[8, 30, 95, 118]	110	5 success	Coordinates	published		valid	0-no_evidence					Y	PCG-UTR-exon	N	Not tested: not intergenic	3
PID0391	Bai2015-hu	Asfla	Afl-milR-80		-	broad.fixed.aspergillus_flavus_2_contigs	-	-	-	GAGGAGAGGGGGGGACGGAC	-	-	-	-	-	-	5 success	Coordinates	published		secondary structure in duplex	-	-	-	-	-	-	not evaluated: hairpin invalid	-	-	-
PID0392	Bai2015-hu	Asfla	Afl-milR-81		-	broad.fixed.aspergillus_flavus_2_contigs	-	-	-	CGGGUCAGGGUGGAGUGCGGGU	-	-	-	-	-	-	5 success	Coordinates	published		secondary structure in duplex	-	-	-	-	-	-	not evaluated: hairpin invalid	-	-	-
PID0393	Bai2015-hu	Asfla	Afl-milR-82		Contig_2.1:1972006-1972142:+	broad.fixed.aspergillus_flavus_2_contigs	JZDT01000555.1:37981-38102:+	GCA_000952835.1_ASM95283v1	gene, TE	CGGACUCGAGAGAAUGGCGGA	FALSE	GUAGAGACGUCGGACUCGAGAGAAUGGCGGAGACCGUAAACAUGCCAAUGGCUGUAUGUUGAAUGAAAAGGCUCGAUGGACUGAUCCCAAGUAUAUCCAGGCAGCUGCGCCAGUCGUUCGAAAAGCCGAGUUGGAGG	.....(((.((((..(((((.((.(((((.((..(((.(((((((........)))))))..)))....(.((.((((.(((.......))).)))).)).)..)).))))).)).)))))....))))))).....	-38.6	[8, 30, 105, 129]	121	5 success	Coordinates	published		valid	0-no_evidence					Y	PCG-CDS-exon	N	Not tested: not intergenic	4
PID0394	Bai2015-hu	Asfla	Afl-milR-83		Contig_2.1:1338491-1338660:-	broad.fixed.aspergillus_flavus_2_contigs	JZDT01000577.1:77226-77372:-	GCA_000952835.1_ASM95283v1	gene, TE	GAGGAAGGUGAGGGAAGGGA	FALSE	UUGAGUCUUCCGUCCUGCUUCCCCGGCUUUUCCCCCGUUGGACCCACGAAAACUACGGGCGGGCUAACUUGGUGACCUCCUUCACGGACUCCACCCGGUGGUCCCGUUCUCCCUUUUCUUUACGGAAGAUCGCAAACAAAGAGGAAGGUGAGGGAAGGGAAACACACUCA	.(((((......(((..((((((..(((((((.(((((.(............).)))))((((.....((.((((......)))).)).....))))((((((((((..............))))..)))))).........)))))))..))))))))).....)))))	-50.8	[12, 35, 138, 159]	147	5 success	Coordinates	published		valid	0-no_evidence					Y	none	Y	N	3
PID0395	Bai2015-hu	Asfla	Afl-milR-84		Contig_2.1:2149489-2149569:-	broad.fixed.aspergillus_flavus_2_contigs	JZDT01000493.1:13665-13728:-	GCA_000952835.1_ASM95283v1	gene, TE	UUGGGUGUGGUGGGCGGUUUA	FALSE	UGUUGUAUUGUUGGGUGUGGUGGGCGGUUUAUUUCGACAGCGAACUCGGGAUGAUCGAGAUCAGAUCCAGCAAUGCAACAU	((((((((((((((((.((((...(((((.(((((((........))))))))))))..)))).)))))))))))))))).	-37.2	[8, 30, 51, 71]	63	5 success	Coordinates	published		valid	0-no_evidence					Y	PCG-intron	N	Not tested: not intergenic	3
PID0396	Bai2015-hu	Asfla	Afl-milR-85		Contig_2.2:1347246-1347519:+	broad.fixed.aspergillus_flavus_2_contigs	JZDT01000823.1:3051-3311:-	GCA_000952835.1_ASM95283v1	gene, TE	GAAGAGAACUCGAUCGUCGGAGG	FALSE	CUGCCGAAAAGAAGAGAACUCGAUCGUCGGAGGUAGAAAGUGUAAUAAACCAUCAACCAGUGUGUAGGGUGCUAGCCAGUGUAAACCAGAUUAAUUAAUGGAACUUAACUAAACCCCUCCCUGUAGUUGUUGUUCCACCCCACCUUUUUCUGGGAGCUUCUCUCUCUCGCCAAUAUACUACCCCUCCUCUAUAUUUUCCUACUAUACCACCACAAACCCCUCUUCCCCUGAUUUCCCUAAAAGCUUCUCAUUUUUGAGUUCCUUUCUCUUGCAA	.(((.....(((((.((((((((..((.((((((.(((((((((..............(((((((..((((..((..((.((...(((((..((....((((((.((((((............))))))..)))))).......))..)))))..))..))..))..)))).)))))))..........)))))))))......................((.......))...........)))))).))..)))))))).)))))...))).	-51.1	[8, 32, 243, 267]	259	5 success	Coordinates	published		valid	0-no_evidence					Y	PCG-UTR-exon	N	Not tested: not intergenic	3
PID0397	Bai2015-hu	Asfla	Afl-milR-86		Contig_2.2:1677154-1677474:+	broad.fixed.aspergillus_flavus_2_contigs	JZDT01000343.1:61888-62191:+	GCA_000952835.1_ASM95283v1	gene, TE	AGGGUAAAGGGCGGAGCGGGA	FALSE	GGACCUCGAAAGGGUAAAGGGCGGAGCGGGAGGCGGAGAACUUAAGGGUUAGUGCGUGGUGCCUGAGGCUGGACUCGUCCCCUAGAUGAGAUGUUUCAUUGAUUGAAGAGAAUGAAGUGACUUGAGGUGGGGGUUUCUAAAAUAGGGGAUUUUCCUGGUUAACACACAAUCUCAAUUGGAUGUGGCUUAUAUAUAUCGAUAUACCAAUCUCAUCGAGUUUACGCCAAAGAUCGAGGGUAGUCACAGUCGAGUAACAAAGGCCCAUUCCGAACUAAGACAGGCUGUCUUUCUUUUGUCUCCUCUUGUUCUUUUUUAGGUUCU	((((((.(((((((...((((.(((((((((((.(((.(.(((..(..(((((.(((((.((((..(((((((((...(((((.((((((((..((((.....))))((((.((..(((......((.((((((((((......))))))))))))......))).)).))))...(.((((((.......)))))).).......)))))))).)).................))).)))).))))).........)))))))...)).)))))..)))).).))).))))))).))))))))..))))))).)))))).	-88.2	[8, 30, 290, 311]	303	5 success	Coordinates	published		valid	0-no_evidence					Y	none	Y	N	3
PID0398	Bai2015-hu	Asfla	Afl-milR-87		Contig_2.2:109954-110077:-	broad.fixed.aspergillus_flavus_2_contigs	JZDT01000260.1:111356-111437:-	GCA_000952835.1_ASM95283v1	gene, TE	UGGGCGAUGUAGAUACACGCGG	FALSE	GUACGUUCCCUGGGCGAUGUAGAUACACGCGGGUGAGGGCGAAGAUCCGAGUGCGCUCAGCGCAGCUCCCACGGUAUGAUGUUGUCCAGCAGGGCCAACAGUGAGACAGCCAGGUGGAGGGCCG	.........(((((((((((..((((.((.((....(((......)))((((((((...))))).))))).)))))).)))))))))))...((((..((.(..(....)..).))...)))).	-39.3	[8, 31, 68, 89]	81	5 success	Coordinates	published		valid	0-no_evidence					Y	PCG-CDS-exon	N	Not tested: not intergenic	4
PID0399	Bai2015-hu	Asfla	Afl-milR-88		Contig_2.2:842065-842155:-	broad.fixed.aspergillus_flavus_2_contigs	JZDT01000734.1:24659-24725:+	GCA_000952835.1_ASM95283v1	gene, TE	GAGGCUGGGGAAGGGAGGGA	FALSE	GGUUUCUCUCUUUCUUCCUCUCUCGUCUACUCUCUUCGUUUCUUCAUUAUUGCUCUGCUUGGAGGCUGGGGAAGGGAGGGAGGGAGUAUGU	.........((((((((((((((..((((.(((((..((.....((....))....))..))))).))))..)))))))))))))).....	-29	[14, 35, 59, 80]	66	5 success	Coordinates	published		valid	0-no_evidence					Y	none	Y	N	3
PID0400	Bai2015-hu	Asfla	Afl-milR-89		Contig_2.2:2215651-2215801:-	broad.fixed.aspergillus_flavus_2_contigs	JZDT01000013.1:2442-2576:-	GCA_000952835.1_ASM95283v1	gene, TE	ACGGAGAAGAUGGAUGAGCCG	FALSE	GGUUUAAAUGACGGAGAAGAUGGAUGAGCCGAGAUGGUCCACCUACUAAGUCCGUUUGCCUGCCAGCCGGUACUAUAAUCAUGGAUAGAUAUACACGCUUUACUUUGAUCGAAGAAAGGGUUCGUCCGAGUCAACGAUUGUCUCGUGACCC	((((.....(((((.(..((((((((((((......(((((.......((((((.(((.....))).))).))).......)))))...........((((.((((....)))))))))))))))))..)))..)..)))))....)))).	-35.4	[8, 30, 117, 142]	134	5 success	Coordinates	published		valid	0-no_evidence					Y	none	Y	N	3
PID0401	Bai2015-hu	Asfla	Afl-milR-90		Contig_2.3:539513-539615:+	broad.fixed.aspergillus_flavus_2_contigs	JZDT01000476.1:86772-86853:-	GCA_000952835.1_ASM95283v1	gene, TE	GCGGGAGAGGGGGUAGGCGUA	FALSE	ACGCCAUCGUCUUCAGGCUCACUUCUGAUCUUCCGCUUCACACAGCGUUUCUUCGCAGGUGAGGCUGUCUUCGCGGGAGAGGGGGUAGGCGUAGACGCGGCAG	..(((..(((((....(((.((((((..((((((((.....(((((.((.(((...))).)).)))))....)))))))))))))).)))..))))).)))..	-42.2	[11, 37, 70, 92]	81	5 success	Coordinates	published		valid	0-no_evidence					Y	PCG-CDS-exon	N	Not tested: not intergenic	4
PID0402	Bai2015-hu	Asfla	Afl-milR-91		Contig_2.3:628147-628473:+	broad.fixed.aspergillus_flavus_2_contigs	JZDT01000745.1:1957-2019:+	GCA_000952835.1_ASM95283v1	gene, TE	CGAUGGUAGCUGAAGGGUGUC	FALSE	UUGGCAGUGAGGGACAUUCAGUCUGCUAUGUGUUCUCCGUACCUUUUUCGUGGGUUCUUAUUAGCUCGGUAAUUGAAGAGUGUGUUGAUUUUGGGGAAACAUUGUAGCCUAUAUCUAUCUUUUUCAUUUAAUGUCUAGGUUGAUGUUGUGAAAGUGAAUCGCCGAAGUUGUUUUGGACGUUGUUGAUCGUCACGGGGAUGACAUCACGAGCAGGGGUUACACCUCAUAUCAGGCCUUGGCAGCUUGGAUGUAUGGACAUUCUUGGUGUUCCUAUGAGCUUGAAUAUAUUAAAGACUCGAUGGUAGCUGAAGGGUGUCUAAUUGAUAA	.((((((((((.....))))..)))))).....(((((((((((.......))))........((((..........)))).....((((((((.((..((((...((..(((((.((((....(((...)))...)))).))))).))...))))..)).))))))))......((((........)))))))))))..(((((.(((((.(((((...))))).......((....)).)))))))))).(((((((((((.(.(((.((((((((((..........))).))).)))).)))).)))))))))))........	-86.3	[254, 276, 294, 316]	62	5 success	Coordinates	published		valid	0-no_evidence					Y	none	Y	N	3
PID0403	Bai2015-hu	Asfla	Afl-milR-92		Contig_2.3:677160-677296:-	broad.fixed.aspergillus_flavus_2_contigs	JZDT01000363.1:35388-35505:-	GCA_000952835.1_ASM95283v1	gene, TE	CGGGGUGGAAUAGGGGGAGGAG	FALSE	ACUGAUCCACUGAUCUCCCGUCCGUUCCCCCCAAAAUCCCCAUUUCAAUGCCCCAUCUUAUUCUCCUCUCCCCUUUCUUGUCUUUCUUUCCACGAAUGUUCCGUACGGGGUGGAAUAGGGGGAGGAGUGGUUUCGAA	..(((.(((((..((((((.((.(((((((((........(((((................................................)))))........)))).))))).)))))))))))))..)))..	-30.9	[9, 34, 103, 126]	117	5 success	Coordinates	published		valid	0-no_evidence					Y	none	Y	N	3
PID0404	Bai2015-hu	Asfla	Afl-milR-93		-	broad.fixed.aspergillus_flavus_2_contigs	-	-	-	ACGGGAGUGGACAGGAGUGGGU	-	-	-	-	-	-	5 success	Coordinates	published		secondary structure in duplex	-	-	-	-	-	-	not evaluated: hairpin invalid	-	-	-
PID0405	Bai2015-hu	Asfla	Afl-milR-94		Contig_2.4:1282533-1282855:+	broad.fixed.aspergillus_flavus_2_contigs	JZDT01000167.1:1150-1459:-	GCA_000952835.1_ASM95283v1	gene, TE	UUCGCGCUGGGAUGGAUAAUUG	FALSE	UGUCGUAAUAUUCGCGCUGGGAUGGAUAAUUGUAACACUGCCCUCGUACCUCUCUAUUGCAGCAUUACUGGCGAUGGGAUUAGUCUCUGACAAAACUGAUCAGAUCGCAUUUUCACUUGUCCGAGCAAUACAUGCCUCUCGGGCAGGAGACGAUUUCCUCGGCCCAAUAAACCAGGUCUGUCCCCUUGUAUCUCGUCUAUGUAUGGUUUCUGGGGGUCUAUGAUUACCAAGGCUAAUAUGUGUAUCUGAAUAGCGUUGGCUCGCAAUUUGGAGCCAUGUGGAGUGUGUUGUUGGUCAGUGUUCCCCUCCUCGUGAAACGGCGA	((((((....((((((..((((.(((..((((((((((.((((.(((..((((..((((((((.......(((((..(((((((..........)))))))..)))))(((.((.((((((((((((.....)))...))))))))).)).)))......((((..........)))).(.(((((...(((............)))....))))).).........(((.((((.(..(.....)..).)))).)))))).)))))..))))..))).)).)))))))).....))))..)))..)))))))))))))))).	-95.3	[8, 31, 295, 317]	309	5 success	Coordinates	published		valid	0-no_evidence					Y	PCG-CDS-exon	N	Not tested: not intergenic	4
PID0406	Bai2015-hu	Asfla	Afl-milR-95		Contig_2.4:1531221-1531440:+	broad.fixed.aspergillus_flavus_2_contigs	JZDT01000158.1:66855-66918:-	GCA_000952835.1_ASM95283v1	gene, TE	GGGGGCGGGUGGAGAGCGGAU	FALSE	AUUCGGCUCGUUCCGCUGCCGCAUACGCCCCAUAAGGUUCUUGCGCAGUCGAAAUGGAUGAAGGACGAGCUGUGGGAAGAUCACAAGGGUUGCGGUGGCGAUGAAUAUGAGGGAUGGGGGUGGGAAAGUUGGUGGGAAAUUGGUUAAAGGCUUACAUUGGCGGUUAGAGUUUAAGACGGAUCAAAGCUUGGGGGCGGGUGGAGAGCGGAUUAAGCAUGUU	.(((.((((((((((((((((((...((((.....((((.((.((((((((...(......)...))).))))).)).))))....)))))))))))))...........)))))..)))).)))...............((.((((..((((.((((.((.....((((((...........))))))....)).))))..))))...)))).))....	-58.9	[146, 167, 187, 209]	63	5 success	Coordinates	published		valid	0-no_evidence					Y	near-PCG	N	Not tested: not intergenic	3
PID0407	Bai2015-hu	Asfla	Afl-milR-96		-	broad.fixed.aspergillus_flavus_2_contigs	-	-	-	CCGCAACGGCUGUGCGAGGUGUA	-	-	-	-	-	-	5 success	Coordinates	published		secondary structure in duplex	-	-	-	-	-	-	not evaluated: hairpin invalid	-	-	-
PID0408	Bai2015-hu	Asfla	Afl-milR-97		-	broad.fixed.aspergillus_flavus_2_contigs	-	-	-	UGGGGUGGAUGUGGAAGCGGGCU	-	-	-	-	-	-	5 success	Coordinates	published		secondary structure in duplex	-	-	-	-	-	-	not evaluated: hairpin invalid	-	-	-
PID0409	Bai2015-hu	Asfla	Afl-milR-98		-	broad.fixed.aspergillus_flavus_2_contigs	-	-	-	GUGGGAUGGGGCUGGGAUGGUA	-	-	-	-	-	-	5 success	Coordinates	published		secondary structure in duplex	-	-	-	-	-	-	not evaluated: hairpin invalid	-	-	-
PID0410	Bai2015-hu	Asfla	Afl-milR-99		Contig_2.5:1204598-1204694:+	broad.fixed.aspergillus_flavus_2_contigs	JZDT01000042.1:503-583:+	GCA_000952835.1_ASM95283v1	gene, TE	AGGGGUAGGGCUAGGGUGGC	FALSE	GAAGAAGACGAGGGGUAGGGCUAGGGUGGCGCCGAUUGCGGUGAGGGCGUUGGAUUGGAGGCGGGUGAAGCCUAGGGUCCUUUCUCUCUCUCUCUCU	..((((((.((((((.((((((.((((..((((..((.((((...........)))).))...))))..))))..)))))).))))))))).)))..	-35.9	[8, 29, 66, 88]	80	5 success	Coordinates	published		valid	0-no_evidence					Y	PCG-CDS-exon	N	Not tested: not intergenic	4
PID0411	Bai2015-hu	Asfla	Afl-milR-100		Contig_2.5:1590776-1590976:+	broad.fixed.aspergillus_flavus_2_contigs	JZDT01000101.1:20932-21106:+	GCA_000952835.1_ASM95283v1	gene, TE	GAGGGUUGGGCUGGACGGGA	FALSE	UCCGGCAUAAGAGGGUUGGGCUGGACGGGAGUAGCUCCUGGUUGUGGCCGUUGAUCCUGGAGUUUUGCGACUGAGCGGAGAGUGUACUCAGCGCUUUGGCGCUAAAACUCCUAAUCAAUUGUCUGAUAAGUACAUACGACCAUAGGGUGUGGAAAACAGGGCUUCCCGUCCGCUCAGCCGUACUUAAGCCACACGCCGGGA	((((((.(((((.((((((((.((((((((..(((.((((((((.(((.((((((...(((((((((((...(((((..(((....)))..)))))...))).))))))))..)))))).))))))).....(((((.........))))).....))))))))))))))))))))))).).))))........)))))).	-87.8	[8, 29, 163, 184]	176	5 success	Coordinates	published		valid	0-no_evidence	RF00001	2.02e-32	5S ribosomal RNA	rRNA	Y	near-PCG	N	Not tested: not intergenic	4
PID0412	Bai2015-hu	Asfla	Afl-milR-101		-	broad.fixed.aspergillus_flavus_2_contigs	-	-	-	UGGACAGGUCUAUGAUGGCGAUU	-	-	-	-	-	-	5 success	Coordinates	published		secondary structure in duplex	-	-	-	-	-	-	not evaluated: hairpin invalid	-	-	-
PID0413	Bai2015-hu	Asfla	Afl-milR-102		Contig_2.5:438106-438449:-	broad.fixed.aspergillus_flavus_2_contigs	JZDT01000047.1:58893-59018:+	GCA_000952835.1_ASM95283v1	gene, TE	GUGGCGGGCAUAGUGGAGGGC	FALSE	CGGCGAGGGACGCCAGCCCGUUUGAAGCGUCACGCCUUCGAUUGAGAAAUUGGUGAGUCUGACAAUCCCACCCUUCCUAUUAGUGCUUUCUCUUUCUACAAUUUAUUCGCCAAUCUAUGUAGGUAUCUACUCACACCAGAUCCCCCGAAGUGGUAAGCUUAUCACCCUGGAAUGACUCGACGCGCAGAGUGGACCAUCCCUUGCCGAUGCUCACCUCUCGCAACGUCAUCGUCAUCGGCUUGGUGGGGAACACAGGGCGAUAGAACUGCACGACUGCUGAGCGGAGAUCAACUUGAUGCUGCAUCUUAGGAUGGUGGCGGGCAUAGUGGAGGGCAUAUUUAGCC	((((((((((.(....((..((((..(((((..((....((((((((((..((.((((((((.................)))).)))).)).))))).))))).....))..((((.(((.(((....))).)))..))))...(((..((((((....))))))..)))........))))).))))..))..).))))))))))((((((.((.((.((..((((((((((((((.((((((.....)).)))).))))......(((....))).((((((..((((...)))).)))).))....)))))))))).))..)).)).))))))........	-98.3	[208, 230, 311, 333]	125	5 success	Coordinates	published		valid	0-no_evidence					Y	PCG-CDS-exon	N	Not tested: not intergenic	4
PID0414	Bai2015-hu	Asfla	Afl-milR-103		Contig_2.5:554647-555002:-	broad.fixed.aspergillus_flavus_2_contigs	JZDT01000436.1:13663-14002:+	GCA_000952835.1_ASM95283v1	gene, TE	GGAUGUUGGCGAGGAAGGCGA	FALSE	UGGCGUUCCCGGAUGUUGGCGAGGAAGGCGAAGAUGAAGACCAUGAGCGCCGACGAGGCGGAGUUCAUGUAUAGCUGCCAUUUGUCGCUGUAGUGGGAGCGAUGGCCGAGCACGAUCCAGGUGAACACGCCCGCCCAGAAGAGCGUGAUGGUGCCUAGGUGGCCGAUUACAUGCGAGACCCAGGUGAUGGUCCGUCCGAAUCGGGUUUCCGUGGGGAGCUCUGUGCCGAACUCGAGGGCGUUCUGGUGCUUCUUGACUAGAUUGACUAGCUGGGUGGUUUUCUCCUGGUCUUGCGCUUCGAGCGUUUGAUGGAGGUUCGCGAGCAUCCUUUUGUGGCUGAGGAUCCGGGACUCCAG	(((.((.(((((((.(((((.(.(((((.((..........(((((((.(((......))).))))))).......((((((..((.(......).))..))))))...(((.((.(((((.(((.....((((((((.((((((((((.(.(((.....)))).)))))(((.(((((((.(((..(((.....))).))))))))))))).....)))))(((((((((.(....).)))).))))).......((((.....))))))))))))..))).))))))).)))(((((((((.(((...))).))))).)))).))))))).).))).)).))))))))).))).	-141.2	[8, 30, 325, 347]	339	5 success	Coordinates	published		valid	0-no_evidence					Y	PCG-CDS-exon	N	Not tested: not intergenic	4
PID0415	Bai2015-hu	Asfla	Afl-milR-104		Contig_2.5:756193-756534:-	broad.fixed.aspergillus_flavus_2_contigs	JZDT01000303.1:65358-65682:+	GCA_000952835.1_ASM95283v1	gene, TE	GCAUGGAACGGUAGCGGCAAGUG	FALSE	GUUGUACCCUGCAUGGAACGGUAGCGGCAAGUGACUCGUUAUAUUAUUGACUUUUGGACUAGCUUCUGCCUGGUGAAUUAGGCAGUGAACACCUUGGCCUGGCUGAUCACUGCACCGUUAUGAAGAUCAAUGUGAGAGGUAAACUCGGUUAUUCAGGUCGGUAAUAAUAUUAUGUAAAUAUUUACGUAUGUGGCGGAGUUCAAACCGGAUGAAUCACGGGGUAGACUAAAAAUCUGAAAUCUGGGACAAAAUUAGGGGGACCCAUUAAAAUUGCCAAGGGGUCAUGCCAAUAAAUGACCUGUCUGGGGCGGAAUGUCGGAUGCCUUCCAGCCGUGGAAACCU	......(((.((.(((((.((((.(((((........((((......))))(((((..((((..(((((((.((((.(((.(((((((.((((.......)).)).)))))))((((...((((((((.......(((.....))))))).))))...))))........(((((((....))))))).....(((........)))..))).)))).)))))))...............))))..)))))...(((...)))........((((..((((((((........))))))...))..))))...)))))..))))))))))).).))......	-94.8	[8, 32, 309, 332]	324	5 success	Coordinates	published		valid	0-no_evidence					Y	none	Y	N	3
PID0416	Bai2015-hu	Asfla	Afl-milR-105		Contig_2.5:1639391-1639741:-	broad.fixed.aspergillus_flavus_2_contigs	JZDT01000687.1:48402-48729:-	GCA_000952835.1_ASM95283v1	gene, TE	UGGGGUGGGAUGGGUUGGCU	FALSE	UCUCCGAGACCCUUGCCACAAGCACCAUCAGACCUCUUACUAACAAUAGCUUAUCUAUGAUACAACAAUGCAGCACGAACUCUUGGCGGCAAACUUUGUACUCGGAAACGGGUUCCCGGGGUAUGUCGGCGAUCUACCCACCUUCGACAAAUCAGUGUCUCGGGACGGGUCACAUUGUGAAAAAUUAAACUGUGGACUGUGCCCGUGGCUGUUUUAGGGAAGGGUUGCAUAGACUAGUGUAUAUAGUACACGUGCGCUAGUUUUCAUUAUAUAAUUAUUCGAAAUUCAUGAGGGUCACUCAGGGUUCAUCCCUUCGAGAUAUGGGGUGGGAUGGGUUGGCUUAUCGAGGAG	.((((..((.....((((...((.(((((..(((((.........((((.....)))).........(((((((........(((.(((((.((((((.(((((....)))))...)))))).))))).)))........(((((...(((.((((....((((((((..((((...(((....)))...))))..)))).))))..)))).)))...))))))))))))((((((((((((.........))))))))))))...............(((((.....((((.....))))(((.....)))))))).....)))))..)))))))))))...))..))))	-106.2	[13, 38, 319, 340]	327	5 success	Coordinates	published		valid	0-no_evidence					Y	none	Y	N	3
PID0417	Bai2015-hu	Asfla	Afl-milR-106		Contig_2.5:2259988-2260118:-	broad.fixed.aspergillus_flavus_2_contigs	JZDT01000722.1:90703-90817:-	GCA_000952835.1_ASM95283v1	gene, TE	UCCGGCUGUACUAUAAAUCGG	FALSE	ACAUAAUUCCUCCGGCUGUACUAUAAAUCGGUGUUUGAAAGGACUUUUCGAUUCUUUCGAUAGAAAGUAAAAAUCGCAUGCACAGUGCAUCGCGUUCUCCGUUUAUAAUGCCAGUAUUUGAGGCAUGUUUC	........((((..((((((.((((((.(((.(.(((((((((........)))))))))..............((((((((...))))).)))..).))))))))).)).))))....))))........	-27.8	[8, 30, 98, 122]	114	5 success	Coordinates	published		valid	0-no_evidence					Y	PCG-UTR-exon	N	Not tested: not intergenic	3
PID0418	Bai2015-hu	Asfla	Afl-milR-107		Contig_2.5:2342819-2342966:-	broad.fixed.aspergillus_flavus_2_contigs	JZDT01000571.1:3840-3970:+	GCA_000952835.1_ASM95283v1	gene, TE	UUGGGAGGGGGUGGAAGGAA	FALSE	CUUUUCUUUUUUGGGAGGGGGUGGAAGGAAAAACAAAUAAUAAUAAAAAAAACAAAAAAAACAAAAACUAAAAUUGAAAUUAAAAUUAAACGUAUAUCACAAGAAAAAUAGAAGAAGGUUUCUUUCCCCCCUUCUUUAUGAACUUGGA	......(((...(((((((((.(((((((((........................................((((........)))).........((....))..............))))))))))))))))))...)))......	-22.5	[8, 29, 119, 139]	131	5 success	Coordinates	published		valid	0-no_evidence					Y	none	Y	N	3
PID0419	Bai2015-hu	Asfla	Afl-milR-108		Contig_2.6:623899-623997:+	broad.fixed.aspergillus_flavus_2_contigs	JZDT01000902.1:16663-16736:+	GCA_000952835.1_ASM95283v1	gene, TE	AGGAAGUGGUGUAGACAGUCC	FALSE	UCGGGCGUAGGAACAGGGCUUUGACUGCGACGCUUCCUUUUUCGAGAAUCUUCAAUAAGCUCCUCGGGAGGAAGUGGUGUAGACAGUCCAGUAGCCAAC	...(((......((.(((((....((((..(((((((((..(((((...(((....)))...))))))))))))))..))))..))))).)).)))...	-31	[15, 41, 66, 88]	73	5 success	Coordinates	published		valid	0-no_evidence					Y	PCG-CDS-exon	N	Not tested: not intergenic	4
PID0420	Bai2015-hu	Asfla	Afl-milR-109		-	broad.fixed.aspergillus_flavus_2_contigs	-	-	-	GCGGGUUAGGAGGAGGUCGGG	-	-	-	-	-	-	5 success	Coordinates	published		secondary structure in duplex	-	-	-	-	-	-	not evaluated: hairpin invalid	-	-	-
PID0421	Bai2015-hu	Asfla	Afl-milR-110		Contig_2.6:1847909-1848148:+	broad.fixed.aspergillus_flavus_2_contigs	JZDT01000384.1:48513-48734:+	GCA_000952835.1_ASM95283v1	gene, TE	GCGGGUGGUGGGGCGAAGGUGAC	FALSE	AGCUGUGCAUGCGGGUGGUGGGGCGAAGGUGACAUGGGAGCAAGGACUCAAGGAAAAGGAGAGCAGACAGACAGUGAGGGCAGAGAGCUAACAGAUAUGAUCCAGAGAUCCUCGACUUCGGAUACCCCCAAAACACGGAAACAGACACUCUGAAGAUGUACAUCACGACGGAGGGAGUCAAAUCCGCCAUCGUCAACAACCCCACCGACUCAAGCCGCAUCACCAUGCAAGCCACCGGCG	.((((.((.(((((((((((.(((...((((.....(((((.(((((((..(((.........(..((.....))..)(((.....)))...........))).))).)))).).))))((....))((.......))...((((...))))..(((....)))((((.((..(((......))).)).)))).........)))).......))).))))))).)))).))...)))).	-63.7	[8, 32, 200, 229]	221	5 success	Coordinates	published		valid	0-no_evidence					Y	PCG-CDS-exon	N	Not tested: not intergenic	4
PID0422	Bai2015-hu	Asfla	Afl-milR-111		Contig_2.6:102400-102570:-	broad.fixed.aspergillus_flavus_2_contigs	JZDT01000351.1:14288-14440:+	GCA_000952835.1_ASM95283v1	gene, TE	GGGGGGGGGAAGGACGGGUU	FALSE	UGAGAUCGUUGGGGGGGGGAAGGACGGGUUAUCUUCAUAUGUUCACUCAGUACUCCGUAAUUGCGGAAAAGAUCUGGGGGCACAAGAACGCUAGACCUGAUUUGGUAGAACGACGAUCACUGCAUUUCUUCUACAGCAUUGGAGCUGGUCUUUUUCUCUCCCUGUUUCUUU	.((((.....(((((((((((((((.((....(((((.(((((..........(((((....)))))..((.(((((.(.........).))))).))......((((((.((.(((......))))))))))))))))))))))).)))))))))))))))....)))).	-51.4	[8, 29, 142, 163]	155	5 success	Coordinates	published		valid	0-no_evidence					Y	near-PCG	N	Not tested: not intergenic	3
PID0423	Bai2015-hu	Asfla	Afl-milR-112		Contig_2.6:213194-213414:-	broad.fixed.aspergillus_flavus_2_contigs	JZDT01000573.1:16798-17001:-	GCA_000952835.1_ASM95283v1	gene, TE	UUCUGACAUGAAUGGCAACUCA	FALSE	CCGGUCUAUGUUCUGACAUGAAUGGCAACUCAUGACAAUCUUCUUGCUUCAUAAGUCACACCGCUGAGUGACGGGUUCUGUAACUAAGCUGCGACUGAACGAUUGUCUUAUAAGCCUAGUUCAAGAGUGCAGACUGGAAAUCCAGUUUGCGACGCAUGGGAUUGAAAUCAGGUUUUGGUGUUACAUCGAGGUUGCUGGUAUUGUUAGCAACGUGGCCUGGA	((((.(((((((((((((....((((((((...((((((((((..........((((.((..(((.(((.((((...)))).))).))))).))))))).))))))).....((((((((((....(((((((((((....))))))))).)).....)))))......)))))((((((...))))))))))))))....)))))).))))))).)))).	-71	[8, 31, 187, 211]	203	5 success	Coordinates	published		valid	0-no_evidence					Y	PCG-CDS-exon	N	Not tested: not intergenic	4
PID0424	Bai2015-hu	Asfla	Afl-milR-113		Contig_2.6:433945-434118:-	broad.fixed.aspergillus_flavus_2_contigs	JZDT01000212.1:17380-17440:-	GCA_000952835.1_ASM95283v1	gene, TE	AAGUAGUAGAAUGUGGAUAAAGA	FALSE	UUCGGGCUGCACAGUAAUUAAACGCUUACUUGUACUACUUUAGACGACGACUAUUGAGUGUCAAACUCUUGGCCUUUUUCGACUUCCCGCUCAAUCUGUUAUCACCCAGUCCACAACACAUCAUUUGAGUUAACAGCAAAUAAGUAGUAGAAUGUGGAUAAAGAUCAGCCCGAC	.((((((((...(((((........))))).((.(((...)))))((.(((.((((((((((((....)))))...............)))))))..))).)).....(((((((((((...(((((.........)))))..)).))....)))))))......)))))))).	-35.2	[103, 123, 139, 163]	60	5 success	Coordinates	published		valid	0-no_evidence					Y	none	Y	N	3
PID0425	Bai2015-hu	Asfla	Afl-milR-114		Contig_2.6:964467-964628:-	broad.fixed.aspergillus_flavus_2_contigs	JZDT01000689.1:87557-87701:+	GCA_000952835.1_ASM95283v1	gene, TE	UGGUUGUAGCUGGCGAUGGAAGU	FALSE	GUUGCCCAGGUGGUUGUAGCUGGCGAUGGAAGUAAGCUUGAUACCAGCAUUGAUGAGGAAGUCCACGAGAGCCGACUUCAUCUUGGUCUGGCCCGACUUGAAGUCGUCUCCGCCGAUGAAGGCCUUGUGCUUCUCGGCCAGCUCAAGGGCGCCGGGGACGAA	.((((((.((((.((..(((((((...((((((..(((.(....))))....((((((..(((..((.(((.((((((((..((((......))))..)))))))).)))))..))).....))))))))))))..)))))))...)).)))).))).))).	-62.3	[8, 32, 128, 152]	144	5 success	Coordinates	published		valid	0-no_evidence					Y	PCG-CDS-exon	N	Not tested: not intergenic	4
PID0426	Bai2015-hu	Asfla	Afl-milR-115		-	broad.fixed.aspergillus_flavus_2_contigs	-	-	-	AGAAGUGGGUGUUGAGAGGACUC	-	-	-	-	-	-	5 success	Coordinates	published		secondary structure in duplex	-	-	-	-	-	-	not evaluated: hairpin invalid	-	-	-
PID0427	Bai2015-hu	Asfla	Afl-milR-116		-	broad.fixed.aspergillus_flavus_2_contigs	-	-	-	GGUUUUGGAAUGUAUCGGUGU	-	-	-	-	-	-	5 success	Coordinates	published		secondary structure in duplex	-	-	-	-	-	-	not evaluated: hairpin invalid	-	-	-
PID0428	Bai2015-hu	Asfla	Afl-milR-117		Contig_2.7:665786-665898:+	broad.fixed.aspergillus_flavus_2_contigs	JZDT01000875.1:46824-46907:-	GCA_000952835.1_ASM95283v1	gene, TE	UCGGGUGGAGAGUGUGGCGGAUG	FALSE	CUGGUUCUCCAUCUAACGACGUCGGCUCGGUCGGCUGGCCGAAAAUGUCACUUCCAGAGGCGGAAUGCUUCGAGAAGGACUCGGGUGGAGAGUGUGGCGGAUGUCCGAACGAU	.(((....)))......((((((.(((((.((..(((.((((....(((.((((..(((((.....)))))..))))))))))).))).)).)).))).))))))........	-41.4	[19, 47, 78, 102]	83	5 success	Coordinates	published		valid	0-no_evidence					Y	PCG-CDS-exon	N	Not tested: not intergenic	4
PID0429	Bai2015-hu	Asfla	Afl-milR-118		Contig_2.7:774797-775026:+	broad.fixed.aspergillus_flavus_2_contigs	JZDT01000886.1:14474-14670:-	GCA_000952835.1_ASM95283v1	gene, TE	UGACUGGAGUGGUUGGAUGUUGG	FALSE	AUGCCUCGUUCACUGACGCCGCGCUCAACAUCGACGGGUCCAGGAUACGUUUCAUCACGGGUAAGCCAACACCUCUCAAUCUUAUGGUAUCUCCACUUGCGACCCAUUAACUCUUCUGCCACGACUUCCUGCAUGAUGUCCCGCGGCAUGCUGUAAAAGAUGUAGAAUAAUGUCUCAUCACUAAAGCUGGCAAUACGUGACUGGAGUGGUUGGAUGUUGGCAACGUUGUA	..((..((((....))))..))((.((((((((((.(.(((((..(((((........((((..((....(((............)))..........)).))))...........(((((.(.(((..((((..(((((....)))))..))))...((((.(((......)))))))....)))))))))..))))).))))).).))).))))))))).........	-56.3	[23, 48, 195, 219]	196	5 success	Coordinates	published		valid	0-no_evidence					Y	PCG-CDS-exon	N	Not tested: not intergenic	4
PID0430	Bai2015-hu	Asfla	Afl-milR-119		Contig_2.7:1355330-1355659:+	broad.fixed.aspergillus_flavus_2_contigs	JZDT01000595.1:15113-15423:+	GCA_000952835.1_ASM95283v1	gene, TE	UGGGGAAGAGCUGAGGGAGGGGA	FALSE	CUUGUAUGAAUGGGGAAGAGCUGAGGGAGGGGAAUAGGUAUGUAUGUGUGUAUGUAUGUAUCUUCGUUGGUUCGGAGACACAAGGUAGGUUUGUUUGGUGUGGUUAAGAGAAAAAAGAAAAGAAAAAGUUCACCAUCACAACCUCAGGCACAAUGAAAUUCGAACCGUUCAGCUCCUAGGGAAGAGAAACACAAACAAAACAAUCUGAUUAUCAUUGAUUCCUUUUCCCCCUAUUUCUUUUCAAUACUUAUAGAGGUUCCUUCUCCUUUUUUCAUUUUAUUUUUCUUCCUCGUUCUCCCUUCGUCUCCUCAUUUCCUCUUCUUUUCAAGA	((((...(((.(((((((((..((.((((((((((((((((((((((....)))))))))))).....((((((((..((....(((((((.((.(((((.(.((....................)).).)))))..)))))))...))....))...))))))))............(((((((((((........................(((((......................)))))......(((((........)))))..........))))))))))).)))).)))))).))..))).)))))).)))....)))).	-75.2	[8, 32, 293, 319]	311	5 success	Coordinates	published		valid	0-no_evidence					Y	none	Y	N	3
PID0431	Bai2015-hu	Asfla	Afl-milR-120		Contig_2.7:44023-44362:-	broad.fixed.aspergillus_flavus_2_contigs	JZDT01000521.1:21382-21676:+	GCA_000952835.1_ASM95283v1	gene, TE	AGGGUAGGGUAGGUAGAGGGC	FALSE	CAAACACCAAAGGGUAGGGUAGGUAGAGGGCAAAUCCCGGGAGAUAACGAGGAAAAGCCAGCGAAUAUUCUGCACAUUACUGGAUUUGUUUUCCAGUUAGCUGUCUGUCCGCCACUGUACAGUCCCUCUUACCGAUAUAAUACUAGCCCUAUAUAUGAGCCCAGACGAACACGUCUCAAGGUGCCCCAUCUCGUUCCACACCGGAACUCUUAUCCACAUUUUGACAGUGAUCUUCUACGGAUUAUGCUGAGUCUGGAGGGUUCUCUUCCCGGAAUCAUUAUUUAUCCCUCACCCCUUCUCUUCAUGCCUAUUUUACCGCCUCAGUUUUAGUGGGCGUACG	.........(((((.((((..(((.(((((.((((.(((((((.....((((........(((.......))).....((((((.......))))))..((((((.((.....)).).))))).))))......(((((..........)))))..(((((((((((....)))))..(((((...))))).(((((.....))))).....((((.((((.....(((((((.....)))))))...)))).))))))))))..))))))).......))))..))))))))))))))))).(((((((((..(.(......).)..)))))))))...	-85.9	[8, 30, 284, 302]	294	5 success	Coordinates	published		valid	0-no_evidence					Y	near-PCG	N	Not tested: not intergenic	3
PID0432	Bai2015-hu	Asfla	Afl-milR-121		Contig_2.7:1274615-1274880:-	broad.fixed.aspergillus_flavus_2_contigs	JZDT01000252.1:4623-4867:-	GCA_000952835.1_ASM95283v1	gene, TE	AGAUGAGUGGCGGUAGACGCAA	FALSE	GAGAGCGGGGAGAUGAGUGGCGGUAGACGCAAUAACCUUAACAAAAAGAAUGCUGGGGGAGAUGAAGUAUGUAGAAACAAUGGACGGAACCAUGGAACGAUGGAAUGUCAGAGGAGGAAAGUGUCCGAGAAGCUCCUGCGAGCUGACCCGUGCAAAAGCCCUUCUCCAUCUACUCCGGAUCGUCAACAUCACGAUAGUCGGCGCGGCAACCGUCCCGAUAAGGAUCACGUGCACUGCCGUCAUGGCCAUUUAUCGAUCUCGGGGAA	((((.(((..(((((.((((((((((..(((....((((.............((((((.(((((.....(((....)))...((((...((((......))))..)))).(((((((....(((.((.(.(((((....)))))..).)).))).....)))))))))))).))))))(((((.......))))).(((((.((((...)))).)))))))))......))).))))))))))...))))).))).))))......	-85.7	[8, 31, 228, 252]	244	5 success	Coordinates	published		valid	0-no_evidence					Y	near-PCG	N	Not tested: not intergenic	3
PID0433	Bai2015-hu	Asfla	Afl-milR-122		Contig_2.7:1484552-1484664:-	broad.fixed.aspergillus_flavus_2_contigs	JZDT01000892.1:26106-26198:+	GCA_000952835.1_ASM95283v1	gene, TE	UGGUUGGGUAGGGGUGAGGUC	FALSE	ACUGCGUCGGGAAGCUUGCCGAUUUGCUCCAUCAUUUGCUGCUUGGUCUCGUCACCAAUGACGGACUGGAAGGUACGGACAAUGGUUGGGUAGGGGUGAGGUCCAAUUGCAGA	.(((((...(((..((((((..(((((((.((((((((((..((((((.(((((....)))))))))))..)))).....)))))).))))))))))))).)))...))))).	-41.1	[10, 35, 80, 102]	92	5 success	Coordinates	published		valid	0-no_evidence					Y	PCG-CDS-exon	N	Not tested: not intergenic	4
PID0434	Bai2015-hu	Asfla	Afl-milR-123		-	broad.fixed.aspergillus_flavus_2_contigs	-	-	-	UGGGGUUGUGUGGAUGGGGGC	-	-	-	-	-	-	5 success	Coordinates	published		secondary structure in duplex	-	-	-	-	-	-	not evaluated: hairpin invalid	-	-	-
PID0435	Bai2015-hu	Asfla	Afl-milR-124		Contig_2.8:843645-843873:+	broad.fixed.aspergillus_flavus_2_contigs	JZDT01000516.1:26756-26964:-	GCA_000952835.1_ASM95283v1	gene, TE	CAGGAUGUGGGGGGGCGGCUCG	FALSE	GCUCGUCACUCUCGUCGCCAACGCCAUUAUUCUGAUUGGAAUGGCUCUUUGACCGUUGAGAGGGAGAACCAGCAUCGCAUGCAAGUUGCGAUUGGGGAUCGUCGGCCUGCGGGCGCUUCCGAUCACUAUCAGCCAUGAUUGCGCCCUACCAAUAAAGAGUCACUUUUCCCCUCCUUUGCACCUCACGGCGUUUCGCGCAGGAUGUGGGGGGGCGGCUCGAAGGAAUCAA	.....((..((..((((((..(.((((.((((((..(((((((.........((((.(((((((((.......((((((.......)))))).(((((..((.(((((..((((((....(((((..........))))))))))).........)).)))))..))))))))))).....))))))))))))))..)))))))))).).))))))..))..)).....	-71.1	[10, 35, 195, 218]	208	5 success	Coordinates	published		valid	0-no_evidence					Y	PCG-CDS-exon	N	Not tested: not intergenic	4
PID0436	Bai2015-hu	Asfla	Afl-milR-125		Contig_2.8:1287763-1287953:+	broad.fixed.aspergillus_flavus_2_contigs	JZDT01000195.1:1-172:+	GCA_000952835.1_ASM95283v1	gene, TE	GGGGGGGUGGGGGCGGAGUAGA	FALSE	GGUUGAGGUUGGGGGGGUGGGGGCGGAGUAGAAUCAAUGAUUUUUGCGAUGGCGCCAUGUCUUCUCAAUACAUUCAUCGUCCGAGAGAGCAUCCUUCUUACCAGCGAUGUACUGUCAGUUACUGUGAAUAUCAAACGCACGGUCCCAAAGUGAUCAGCCCCUACUGUAGUUCCCGCUCAAGUGACCUUCCG	((..(((((((...((((((((((..(((((......(((((...((..(((.(((.(((...........((((((.(((.((.((.(((((((.......)).))))).)).)).)..)).)))))).......))).))).)))..)))))))....)))))...))))))))))...))))))))).	-55.3	[8, 31, 159, 183]	175	5 success	Coordinates	published		valid	0-no_evidence					Y	PCG-CDS-exon	N	Not tested: not intergenic	4
PID0437	Bai2015-hu	Asfla	Afl-milR-126		Contig_2.8:1991461-1991816:+	broad.fixed.aspergillus_flavus_2_contigs	JZDT01000305.1:330-669:-	GCA_000952835.1_ASM95283v1	gene, TE	CCGGGGGGGUGGGCGGCGAC	FALSE	GUAGGAUCAACCGGGGGGGUGGGCGGCGACAAGCAGAAAGACGGGAACGGCGUUUAGGAGAGGACAAGCCAGUCCAAGUCCGACCAGCCAGACUAAGAGGAAAGAAACAAAAGAAUACCAGACGAUGAAAGAAUAAAGAUCUUAAAUCCCCCUGCAGAAAAAGGAAAGAGGAGACACGGACAGAUCCGGUCAGAUUAGAGGAAAUAAUGGUGGAGGGGGGGUGGGGAGGGAUGAGAGGCAAAGGUCAGGACAAGGUGUAGCGGUGGAUCUGAGGUGUUCUGGUGGGUGGGAGGACGUGGAUAUCAGGCGCGGUGCCUGGAGUGCUGGGCUGUUCAAUCACUGCCGGCUGGGCGUGA	.((.(..((.((((.((((((((((((....((((......((((.((.((((((......((.....)).(((((.((((..(((.(((.....................((((((((.(((..(.............((((...(((((((.((..............(((((.((((....)))))))...))..............)).)))))))...)))).............)..)))......((((.((....)).))))..))))))))..))).)))..)))).)))))...)))))).)).))))...))))..))))))).))).)).)))).))..).)).	-106.9	[8, 29, 324, 347]	339	5 success	Coordinates	published		valid	0-no_evidence					Y	PCG-intron	N	Not tested: not intergenic	3
PID0438	Bai2015-hu	Asfla	Afl-milR-127		Contig_2.8:82464-82536:-	broad.fixed.aspergillus_flavus_2_contigs	JZDT01000059.1:71567-71622:-	GCA_000952835.1_ASM95283v1	gene, TE	UUGAACACUGACCAAGCUUUA	FALSE	GCACCGAUGAUUGAACACUGACCAAGCUUUAUAGUUCAAAGAAAAGCCUCUGGUCCAGGAUCGCGAUGGUGCG	((((((.((..(((.(.(((((((.(((((............)))))...)))).)))).))))).)))))).	-20.9	[8, 30, 41, 63]	55	5 success	Coordinates	published		valid	0-no_evidence					Y	PCG-CDS-exon	N	Not tested: not intergenic	4
PID0439	Bai2015-hu	Asfla	Afl-milR-128		-	broad.fixed.aspergillus_flavus_2_contigs	-	-	-	GAGGGAGGAUGAUGUGGAGGUC	-	-	-	-	-	-	5 success	Coordinates	published		secondary structure in duplex	-	-	-	-	-	-	not evaluated: hairpin invalid	-	-	-
PID0440	Bai2015-hu	Asfla	Afl-milR-129		Contig_2.9:634454-634543:+	broad.fixed.aspergillus_flavus_2_contigs	JZDT01000144.1:64623-64695:-	GCA_000952835.1_ASM95283v1	gene, TE	AAGGGCUUGGUUAACGGAGUCAU	FALSE	AUCCGGCACCAAGGGCUUGGUUAACGGAGUCAUUACCCAUCCUAGACAUCGGAACUUUUUUUUCUUGAUUAUCGGCUCUUGCACACGGAG	.((((....(((((((((((((((.((((..........(((........))).......)))))))))))..))))))))....)))).	-21.2	[8, 32, 56, 81]	73	5 success	Coordinates	published		valid	0-no_evidence					Y	none	Y	N	3
PID0441	Bai2015-hu	Asfla	Afl-milR-130		-	broad.fixed.aspergillus_flavus_2_contigs	-	-	-	GUGGGCUAACGAGGAGGGUUG	-	-	-	-	-	-	5 success	Coordinates	published		secondary structure in duplex	-	-	-	-	-	-	not evaluated: hairpin invalid	-	-	-
PID0442	Bai2015-hu	Asfla	Afl-milR-131		Contig_2.9:1326252-1326614:+	broad.fixed.aspergillus_flavus_2_contigs	JZDT01000565.1:16330-16672:-	GCA_000952835.1_ASM95283v1	gene, TE	UGGGUUUGUGGUUGUGGAGGUUG	FALSE	CCGUCUGGCAUGCCCUCGACCGUAUGGGAAACGGCCGAAACGGCCGAGAUGAGGGAUAUAUUGCCGUUGUAUGGCAAGACGUAUCAUUUUUGGCAGGUGGAUCGCGGGGAUCCGGUGCCGUUGGGGGCGCCGAUGCUUAUGGGGAGUUUUACUACUGAUGAGGAUGUGAAGAGGGUUCAUGAGGGGGGUUUGGAAGGGUUGUGUAAAGAUAGGGAUGGGAGGUUUGGGGUUGAUGUGAAGCAUAAGAGGGAGGUUAGGAAGGGGAUUGAGAGGCCCGAGGGGUGGGUGGUUGAUUCUGGUGAGUUUUCUUUUUCUUUUUCUUUCUUGUUUUGGGUUUGUGGUUGUGGAGGUUGUGUAAGGCUA	..((((.(((((.((((.((...((.(.((((..(((((((.(((((((.....(((((.(((((((...)))))))...)))))..)))))))....(((((.....)))))((((((......)))))).((.(((((.((.(((...))).)).))))).))(((((.....)))))((((((((...(((((..((((((....(((..(((............)))..)))...))))))(((((((.(((.....((((((((...(((((.....)))))..))))))))..))).))))))))))))...))))))))))))))))))).).)).)).)))).))))).))))..	-109.2	[10, 38, 328, 352]	342	5 success	Coordinates	published		valid	0-no_evidence					Y	PCG-CDS-exon	N	Not tested: not intergenic	4
PID0443	Bai2015-hu	Asfla	Afl-milR-132		-	broad.fixed.aspergillus_flavus_2_contigs	-	-	-	GUGGGAGGGAGGAGGAGGAU	-	-	-	-	-	-	5 success	Coordinates	published		secondary structure in duplex, >20 mismatches in duplex	-	-	-	-	-	-	not evaluated: hairpin invalid	-	-	-
PID0444	Bai2015-hu	Asfla	Afl-milR-133		Contig_2.9:1127492-1127707:-	broad.fixed.aspergillus_flavus_2_contigs	JZDT01000040.1:12176-12375:-	GCA_000952835.1_ASM95283v1	gene, TE	AGGGUGUGGUAGGGAAGGGG	FALSE	AAUAUCCGAAAGGGUGUGGUAGGGAAGGGGAUUCAGAUGGGUUAACGCUGUGUUGUCCACCGGCGAGUCUUAUAUUCACUCGUGAUGUUUUGAAACAAUCAAAUGGGUAGAUAAUGAUAGUUCAUCAAGUAAAACUCAUUUCAGUCCACUCUGGGGCGCAGGUUUUACUGGCUGGCGAGGAGCUUCUCGUUCUCCUGCUGAGCCUUCUCGAAAGCC	......(((.(((((..(((((((((.((((....(((((......(((((((((((.(((.((((((.........)))))).....(((((.....)))))..))).)))))).)))))))))).((((((((((.((((((......)))))).)..)))))))))((((.......)))))))).))).))))))..))))).)))......	-63.3	[8, 29, 185, 207]	199	5 success	Coordinates	published		valid	0-no_evidence					Y	PCG-CDS-exon	N	Not tested: not intergenic	4
PID0445	Bai2015-hu	Asfla	Afl-milR-134		Contig_2.9:1314251-1314351:-	broad.fixed.aspergillus_flavus_2_contigs	JZDT01000441.1:14202-14284:-	GCA_000952835.1_ASM95283v1	gene, TE	AGGGUUUCUGGAGUGGCGAUG	FALSE	CGAUGGUAGUAGGGUUUCUGGAGUGGCGAUGUACCCGACUUGCGAGAAAUGUAUGUACGCGGUCGAUGGCUACUCCGUAUGAAACAUGUACUCCACCAUGC	..(((((((((.(((((((((((((((.((..(((((((.(((.......))).)).)).)))..)).)))))))))...))))).).))))..)))))..	-38.8	[8, 30, 64, 90]	82	5 success	Coordinates	published		valid	0-no_evidence					Y	none	Y	N	3
PID0446	Bai2015-hu	Asfla	Afl-milR-135		Contig_2.9:1840380-1840490:-	broad.fixed.aspergillus_flavus_2_contigs	JZDT01000453.1:164627-164722:-	GCA_000952835.1_ASM95283v1	gene, TE	UGCAGUUCGUUGGCGGCAGU	FALSE	GACGGGGAUUUGCAGUUCGUUGGCGGCAGUAUCUCUGAUCUUGGUCAGGUACAUGGCGACCAGCUGAGUAGCCGAGAACUUCUGCUUCUGCUGACGGAAGUUAACCUCGAC	..(((((.((.((..(((((((((((.((((.....(.(((((((....(((.((((.....)))).)))))))))).)...)))).))))))))))).)).)))))))..	-37.4	[8, 29, 83, 103]	95	5 success	Coordinates	published		valid	0-no_evidence					Y	PCG-CDS-exon	N	Not tested: not intergenic	4
PID0447	Yang2015-wo	Zytri	novel_mir_1		NC_018215.1:919356-919425:-	GCF_000219625.1_MYCGR_v2.0	CM001199.1:919363-919425:-	GCA_000219625.1_MYCGR v2.0	gene, TE	GGCCGGCUGGCUCAAUGGUA	FALSE	AACCGUUCACCAGCUAUUCUGGCUUUCGAGCGAUAAAAGUCCCGGCCGGCUGGCUCAAUGGUAGAGUGCU	.((((((..((((((.....(((...((.(.(((....)))))))))))))))...))))))........	-18.5	[0, 29, 41, 62]	62	1 no_coords	Fail/lacking	recovered		valid	3-pass_rep					Y	none	Y	N	2
PID0448	Yang2015-wo	Zytri	novel_mir_2		-	GCF_000219625.1_MYCGR_v2.0	-	-	-	GGGGAAUCCGUAGUGUUGUAUGU	-	-	-	-	-	-	1 no_coords	Fail/lacking	recovered		recovered no valid hairpins	-	-	-	-	-	-	not evaluated: hairpin invalid	-	-	-
PID0449	Yang2015-wo	Zytri	novel_mir_3		-	GCF_000219625.1_MYCGR_v2.0	-	-	-	CUGGUGUUCGGGUUGUCA	-	-	-	-	-	-	1 no_coords	Fail/lacking	recovered		recovered no valid hairpins	-	-	-	-	-	-	not evaluated: hairpin invalid	-	-	-
PID0450	Yang2015-wo	Zytri	novel_mir_4		-	GCF_000219625.1_MYCGR_v2.0	-	-	-	GUGGUGGUGGAAUUGGAAG	-	-	-	-	-	-	1 no_coords	Fail/lacking	recovered		recovered no valid hairpins	-	-	-	-	-	-	not evaluated: hairpin invalid	-	-	-
PID0451	Yang2015-wo	Zytri	novel_mir_5		NC_018218.1:5976377-5976493:+	GCF_000219625.1_MYCGR_v2.0	CM001196.1:5976402-5976470:+	GCA_000219625.1_MYCGR v2.0	gene, TE	UGCGACUGGUUUUGGCUUCG	FALSE	CGCCGGUCUGCGGGUUCUGAUGUUUCGAGUGUCGAGCCACACGCGAUCGUCGACCUUGAGCGCCCGGGCGGGCUUGCGACUGGUUUUGGCUUCGUCAUAUCGUGCUUGCGCAUAGCG	(((..((.(((((((..((((((..((((.(((((((((..(((((..(((..(((.(.....).)))..))))))))..))).))))))))))..)))))).))))))).)).)))	-40.7	[25, 48, 72, 93]	68	1 no_coords	Fail/lacking	recovered		valid	1-fail					Y	TE	N	Not tested: not intergenic	4
PID0452	Yang2015-wo	Zytri	novel_mir_6		NC_018218.1:5978855-5978927:+	GCF_000219625.1_MYCGR_v2.0	CM001196.1:5978867-5978917:+	GCA_000219625.1_MYCGR v2.0	gene, TE	UGACUGGGGAUUUGGACGGU	FALSE	GAUGCACGGUGAAUUGACUGGGGAUUUGGACGGUCGAAUGUGACCGAUAGCGCUCAAGUCAUCGACGUGUUUC	((.(((((..((..(((((.(((..(((..(((((......))))).)))..))).)))))))..))))).))	-24.6	[12, 33, 42, 62]	50	1 no_coords	Fail/lacking	recovered		valid	2-pass					Y	TE	N	Not tested: not intergenic	4
PID0453	Yang2015-wo	Zytri	novel_mir_7		NC_018218.1:5981594-5981672:+	GCF_000219625.1_MYCGR_v2.0	CM001196.1:5981594-5981672:+	GCA_000219625.1_MYCGR v2.0	gene, TE	UGCGAUAGGCUGGCUGUUUA	FALSE	CAUGCGAUAGGCUGGCUGUUUACCCUCUUCACCAAAUCUUUCUGGUCUGUGAUUCCUGCAAACCAAGCCUCAUCGUAUC	.((((((((((((((.(((...........((((........))))...........)))..)).))))).))))))).	-20.6	[0, 21, 54, 78]	78	1 no_coords	Fail/lacking	recovered		valid	2-pass					Y	TE	N	Not tested: not intergenic	4
PID0454	Yang2015-wo	Zytri	novel_mir_8		NC_018211.1:1403107-1403170:-	GCF_000219625.1_MYCGR_v2.0	CM001203.1:1403111-1403166:-	GCA_000219625.1_MYCGR v2.0	gene, TE	UGGACCAGACUGUUACAUGU	FALSE	CGCUACACCCGAGCAGUCUGAACCUCCUUCGCGAUCUCCAUGGACCAGACUGUUACAUGUGGCG	(((((((....(((((((((..((.................))..)))))))))...)))))))	-23.1	[4, 26, 38, 59]	55	1 no_coords	Fail/lacking	recovered		valid	1-fail					Y	none	Y	N	4
PID0455	Yang2015-wo	Zytri	novel_mir_9		-	GCF_000219625.1_MYCGR_v2.0	-	-	-	UGAUGGCGGAAUUGGAAGA	-	-	-	-	-	-	1 no_coords	Fail/lacking	recovered		recovered no valid hairpins	-	-	-	-	-	-	not evaluated: hairpin invalid	-	-	-
PID0456	Yang2015-wo	Zytri	novel_mir_10		-	GCF_000219625.1_MYCGR_v2.0	-	-	-	UUUGGAGUGGAUGAAAAG	-	-	-	-	-	-	1 no_coords	Fail/lacking	recovered		recovered no valid hairpins	-	-	-	-	-	-	not evaluated: hairpin invalid	-	-	-
PID0457	Yang2015-wo	Zytri	novel_mir_11		NC_018215.1:2562194-2562239:-	GCF_000219625.1_MYCGR_v2.0	CM001199.1:2562194-2562239:-	GCA_000219625.1_MYCGR v2.0	gene, TE	UCUCAUGUGUCCAUGUUAGCU	FALSE	UCUCUCAUGUGUCCAUGUUAGCUGCCUAAUAUGGACACAUGAGUAU	...((((((((((((((((((....))))))))))))))))))...	-27.7	[0, 22, 23, 45]	45	1 no_coords	Fail/lacking	recovered		valid	2-pass					Y	TE	N	Not tested: not intergenic	4
PID0458	Yang2015-wo	Zytri	novel_mir_12		NC_018217.1:1441722-1441941:+	GCF_000219625.1_MYCGR_v2.0	CM001197.1:1441725-1441939:+	GCA_000219625.1_MYCGR v2.0	gene, TE	GGCGCUGUAGCAAAGUGGUUA	FALSE	CCAUCGGCGCUGUAGCAAAGUGGUUACUGCGAUUGACUCGAACGAUACGGGUCUCAUUGGACCUUAUAUCGCUGAUAUCAAUUCUCCUCGGAGGCGCAGGUUCGAGUCCUGCCGGCGUCGUGAAGCUAUGCUUUUUGCCCGUCGAAUGAACUACUUUUCGUCCUAUUUGGUCAACAAUUGCGGAUGCAAUGGCUGAAACCAUUUUGCUAUUGUGUAGAGG	((.((.((((.((((((((((((((.(.((.((((.......(((((.((((((....))))))..)))))...........((((....)))).(((((.......)))))(((((.((.(((((...))))).))..)))))..............(((((((.(((.....))).)).))))))))).)).).)))))))))))))).)))).))))	-74.8	[3, 25, 195, 217]	214	1 no_coords	Fail/lacking	recovered		valid	3-pass_rep	RF00005	1.85e-57	tRNA	tRNA	Y	none	Y	N	4
PID0459	Lin2016-hq	Rhsol	Rhi-milR-77		KB317696.1:795409-795502:+	AFRT00000000.1_scaffolds	KB317696.1:795439-795492:+	GCA_000334115.1_Rhisol_AG1IA_1.0	gene, TE	GCGGGAUUGCAGUACAAAGGGAGAU	TRUE	CAGCCGAGUUUGGCUUGACAGUUGCAGCUAUCCCCGUUGUGCUCAUUCUGCUGAUUGGAUGCGGGAUUGCAGUACAAAGGGAGAUCAAAUGGCU	.(((((....)))))..........((((((((((.(((((((((((((((.........)))))).)).))))))).))).))).....))))	-30.2	[30, 52, 58, 83]	53	5 success	Coordinates	published		valid	3-pass_rep					Y	PCG-CDS-exon	N	Not tested: not intergenic	4
PID0460	Lin2016-hq	Rhsol	Rhi-milR-154		KB317696.1:999145-999209:+	AFRT00000000.1_scaffolds	KB317696.1:999153-999201:+	GCA_000334115.1_Rhisol_AG1IA_1.0	gene, TE	AUGUUGGAAGAAUUGCAGGGCUCG	TRUE	AUAGGCGCAAUGUUGGAAGAAUUGCAGGGCUCGCGUGGCCUGUAUCUUCUUAACAGUUAAUGCAU	....(((...((((((((((..((((((.(......).))))))))))).))))).....)))..	-20.8	[8, 27, 38, 56]	48	5 success	Coordinates	published		valid	2-pass					Y	near-PCG	N	Not tested: not intergenic	3
PID0461	Lin2016-hq	Rhsol	Rhi-milR-12		KB317696.1:2014702-2014815:+	AFRT00000000.1_scaffolds	KB317696.1:2014713-2014795:+	GCA_000334115.1_Rhisol_AG1IA_1.0	gene, TE	UAACGGUAACUGUGGCAUGG	TRUE	UCUUUUCUUGUUCACCACAUGCCCAUUACCUUAUGGCAUGCUCCCUUAUCUCUUGCCUAACCUCUCCUAUAACGGUAACUGUGGCAUGGGGUGAACAUACAGGUGCCUGGAUAU	........((((((((.(((((((((((((((((((((...............))))...........)))).))))).)).)))))).))))))))..(((....))).....	-34.5	[11, 32, 69, 93]	82	5 success	Coordinates	published		valid	2-pass					Y	PCG-intron	N	Not tested: not intergenic	3
PID0462	Lin2016-hq	Rhsol	Rhi-milR-136		KB317696.1:2178060-2178149:+	AFRT00000000.1_scaffolds	KB317696.1:2178068-2178119:+	GCA_000334115.1_Rhisol_AG1IA_1.0	gene, TE	UGGAAGCAGGUAUUGGAUGAUGG	TRUE	AUGAGCUACAUGGAAGCAGGUAUUGGAUGAUGGUUUACAUUGCUGGUAUUUGCUCUCAUUCCCAAAAAACCCAUAGAUUGGGUGGCCUUU	....(((..((((.((((((((((((.(((((.....))))))))))))))))).)))).........(((((.....))))))))....	-24.9	[8, 31, 37, 59]	51	5 success	Coordinates	published		valid	3-pass_rep					Y	none	Y	N	2
PID0463	Lin2016-hq	Rhsol	Rhi-milR-14		KB317696.1:3612199-3612272:-	AFRT00000000.1_scaffolds	KB317696.1:3612209-3612267:-	GCA_000334115.1_Rhisol_AG1IA_1.0	gene, TE	ACUGUCGACGGCGGGCUCCG	FALSE	UUGUGCUAUAAGGAGUCAUUGUUGCAGGCAGAUUUCAUGUACAUACUGUCGACGGCGGGCUCCGCAGAACAUUA	((.(((.....((((((..(((((..(((((..............)))))..)))))))))))))).)).....	-20.2	[5, 33, 42, 63]	58	5 success	Coordinates	published		valid	3-pass_rep					Y	near-PCG	N	Not tested: not intergenic	2
PID0464	Lin2016-hq	Rhsol	Rhi-milR-29		KB317696.1:3612199-3612272:-	AFRT00000000.1_scaffolds	KB317696.1:3612207-3612264:-	GCA_000334115.1_Rhisol_AG1IA_1.0	gene, TE	ACUGUCGACGGCGGGCUCCG	TRUE	UUGUGCUAUAAGGAGUCAUUGUUGCAGGCAGAUUUCAUGUACAUACUGUCGACGGCGGGCUCCGCAGAACAUUA	((.(((.....((((((..(((((..(((((..............)))))..)))))))))))))).)).....	-20.2	[8, 31, 44, 65]	57	5 success	Coordinates	published		valid	3-pass_rep					Y	near-PCG	N	Not tested: not intergenic	2
PID0465	Lin2016-hq	Rhsol	Rhi-milR-84		-	AFRT00000000.1_scaffolds	-	-	-	GGGCUUUAGACGCGCAAGGGC	-	-	-	-	-	-	5 success	Coordinates	published		secondary structure in duplex	-	-	-	-	-	-	not evaluated: hairpin invalid	-	-	-
PID0466	Lin2016-hq	Rhsol	Rhi-milR-20		-	AFRT00000000.1_scaffolds	-	-	-	AGCAGAGGAGACUGAAGACCAA	-	-	-	-	-	-	5 success	Coordinates	published		secondary structure in duplex	-	-	-	-	-	-	not evaluated: hairpin invalid	-	-	-
PID0467	Lin2016-hq	Rhsol	Rhi-milR-124		KB317705.1:339227-339316:+	AFRT00000000.1_scaffolds	KB317705.1:339235-339306:+	GCA_000334115.1_Rhisol_AG1IA_1.0	gene, TE	UGAAGAGGCUGGAGACUUGUA	TRUE	AAAAGCCGACAAGAAAUUCAACUCUUCAACCGGAUGGUUCUCCAGUAGUAGCUCCAAGUAUGAAGAGGCUGGAGACUUGUAUCAGCAAGC	....((..(((((...((((.(((((((((.((((((....)))........)))..)).)))))))..))))..)))))....))....	-20.3	[8, 28, 58, 79]	71	5 success	Coordinates	published		valid	3-pass_rep					Y	PCG-CDS-exon	N	Not tested: not intergenic	4
PID0468	Lin2016-hq	Rhsol	Rhi-milR-78		KB317705.1:400478-400547:-	AFRT00000000.1_scaffolds	KB317705.1:400488-400536:-	GCA_000334115.1_Rhisol_AG1IA_1.0	gene, TE	CGGAGAACAUUAACAGAGGGAGA	TRUE	UCUUUCGCGACUUCCUCUGUUAACUGGGCUUCCGCGCCUCGGAGAACAUUAACAGAGGGAGAGCAAGUAG	......((..(((((((((((((.((..((.(((.....)))))..))))))))))))))).))......	-28.4	[11, 34, 38, 59]	48	5 success	Coordinates	published		valid	3-pass_rep					Y	PCG-CDS-exon	N	Not tested: not intergenic	4
PID0469	Lin2016-hq	Rhsol	Rhi-milR-53		KB317705.1:691017-691094:+	AFRT00000000.1_scaffolds	KB317705.1:691035-691084:+	GCA_000334115.1_Rhisol_AG1IA_1.0	gene, TE	CGCGUGAACGACUUCGGAGGAC	TRUE	GGCUCGAGCGAGAACUGGGCUUUUGAAGCGCUCAUGCUGUCCUCGCACGCGUGAACGACUUCGGAGGACGAGUGAGCG	.((((........(((.(.(((((((((((.(((((((((....))).)))))).)).))))))))).).))))))).	-29.7	[18, 38, 45, 67]	49	5 success	Coordinates	published		valid	3-pass_rep					Y	PCG-CDS-exon	N	Not tested: not intergenic	4
PID0470	Lin2016-hq	Rhsol	Rhi-milR-23		KB317705.1:789597-789669:-	AFRT00000000.1_scaffolds	KB317705.1:789605-789661:-	GCA_000334115.1_Rhisol_AG1IA_1.0	gene, TE	CCGCAGCUCUCGUUGGCUUCGUAGCAGC	TRUE	UCUUCUCCGCAGCUCUCGUUGGCUUCGUAGCAGCUAAACCUGCUGUUGAAACUCGCGACAGCUGUAAAGGCAA	...(((..((((((.((((.((.((((..(((((.......))))))))).)).)))).))))))..)))...	-25.2	[8, 32, 42, 64]	56	5 success	Coordinates	published		valid	3-pass_rep					Y	PCG-CDS-exon	N	Not tested: not intergenic	4
PID0471	Lin2016-hq	Rhsol	Rhi-milR-111		-	AFRT00000000.1_scaffolds	-	-	-	UAUAUACAUGCAACUGGGGAGCG	-	-	-	-	-	-	5 success	Coordinates	published		secondary structure in duplex	-	-	-	-	-	-	not evaluated: hairpin invalid	-	-	-
PID0472	Lin2016-hq	Rhsol	Rhi-milR-109		KB317801.1:21476-21549:-	AFRT00000000.1_scaffolds	KB317801.1:21486-21540:-	GCA_000334115.1_Rhisol_AG1IA_1.0	gene, TE	UUAGUAGCUGUUCUCUUAGGGGC	TRUE	UUGACCAGGGUGCCUGGCCAGAGGGGAGUAAUGGAAUUCUUUUAGUAGCUGUUCUCUUAGGGGCUCAUUGUCCA	..(((..((((.((((...((((((.(((.((.(((....))).)).))).)))))))))).))))...)))..	-21.8	[9, 35, 40, 63]	54	5 success	Coordinates	published		valid	3-pass_rep					Y	TE	N	Not tested: not intergenic	4
PID0473	Lin2016-hq	Rhsol	Rhi-milR-63		-	AFRT00000000.1_scaffolds	-	-	-	GAAAUCAGACAACAGGGAAGGCAC	-	-	-	-	-	-	5 success	Coordinates	published		secondary structure in duplex, >20 mismatches in duplex	-	-	-	-	-	-	not evaluated: hairpin invalid	-	-	-
PID0474	Lin2016-hq	Rhsol	Rhi-milR-38		KB317706.1:45512-45581:+	AFRT00000000.1_scaffolds	KB317706.1:45520-45573:+	GCA_000334115.1_Rhisol_AG1IA_1.0	gene, TE	AUUGAGGCCAUCUGAACAAGGG	TRUE	AUAUUUGGCCAUUGAGGCCAUCUGAACAAGGGCAGCUAACUUGCAUGCAGUGGCCUGUUUGGCAUCAGGG	.......((((...((((((.(((..((((.........))))....)))))))))...)))).......	-24	[8, 30, 38, 61]	53	5 success	Coordinates	published		valid	3-pass_rep					Y	TE	N	Not tested: not intergenic	4
PID0475	Lin2016-hq	Rhsol	Rhi-milR-159		KB317706.1:61779-61891:+	AFRT00000000.1_scaffolds	KB317706.1:61825-61869:+	GCA_000334115.1_Rhisol_AG1IA_1.0	gene, TE	UUUAGUAGUUAGAUGUUGUAGGG	TRUE	CAUGCCUUAAGCAUUGCCUCACUGUACUUAGGUAGCUCACCAACGCCUUACAGCAUCUUGUCACCAUAGUUUAGUAGUUAGAUGUUGUAGGGUGGUACCUUGCCGCCUUAAGC	.((((.....))))............(((((((.((.......(((((((((((((((....((.........))....))))))))))))))).......)).))).)))).	-32.4	[46, 68, 68, 90]	44	5 success	Coordinates	published		valid	2-pass					Y	none	Y	N	3
PID0476	Lin2016-hq	Rhsol	Rhi-milR-74		KB317706.1:133332-133418:-	AFRT00000000.1_scaffolds	KB317706.1:133342-133408:-	GCA_000334115.1_Rhisol_AG1IA_1.0	gene, TE	UGCCGAGGCGAAGGCUGACACCCGUU	TRUE	UUUAUUGUGGGUGUUGACCUCGCCUUGCCAUGCGUUGCGGUGGAUGCCGCGCUGCAUGCCGAGGCGAAGGCUGACACCCGUUGUCAC	........((((((((.((((((((((.((((((.((((((....)))))).)))))).))))))).))).))))))))........	-47.7	[10, 30, 55, 76]	66	5 success	Coordinates	published		valid	3-pass_rep					Y	PCG-CDS-exon	N	Not tested: not intergenic	4
PID0477	Lin2016-hq	Rhsol	Rhi-milR-120		KB317706.1:539986-540055:+	AFRT00000000.1_scaffolds	KB317706.1:539994-540048:+	GCA_000334115.1_Rhisol_AG1IA_1.0	gene, TE	UCGAGUCGAGGAUUGUAGGGCCUG	TRUE	CUCGAAUUGAUCGAGUCGAGGAUUGUAGGGCCUGUAAAGGAGUUGCAGACCAUCAUGAAGGGUAUUCGAA	.((((((...((..((.((((.((((((..(((....)))..)))))).)).))))...))..)))))).	-16.4	[8, 31, 38, 62]	54	5 success	Coordinates	published		valid	2-pass					Y	PCG-CDS-exon	N	Not tested: not intergenic	4
PID0478	Lin2016-hq	Rhsol	Rhi-milR-64		-	AFRT00000000.1_scaffolds	-	-	-	GAGACAGAUACGGGGCAAACAUU	-	-	-	-	-	-	5 success	Coordinates	published		secondary structure in duplex, >20 mismatches in duplex	-	-	-	-	-	-	not evaluated: hairpin invalid	-	-	-
PID0479	Lin2016-hq	Rhsol	Rhi-milR-129		KB317706.1:697495-697609:+	AFRT00000000.1_scaffolds	KB317706.1:697514-697565:+	GCA_000334115.1_Rhisol_AG1IA_1.0	gene, TE	GUGAGGCUAUGGACAUGGACGAUGAC	TRUE	GGAAGCCAGGCAGGGAGACGGUGAGGCUAUGGACAUGGACGAUGACCAGUCGUCUAAUCCGAAUCCUCAACAGAACUCGUCGGUGCCUAGUACCUGUGCGUGUUUUUCCCUUGCU	........(((((((.((...(((((...((((..((((((((.....)))))))).))))...)))))..(((((.(((.(((((...)))))...))).))))))))))))))	-39.6	[19, 41, 49, 70]	51	5 success	Coordinates	published		valid	3-pass_rep					Y	PCG-CDS-exon	N	Not tested: not intergenic	4
PID0480	Lin2016-hq	Rhsol	Rhi-milR-71		KB317805.1:5948-6017:+	AFRT00000000.1_scaffolds	KB317805.1:5956-6009:+	GCA_000334115.1_Rhisol_AG1IA_1.0	gene, TE	AUGGAUCCGUAGGUGUUGGCGC	TRUE	GCAGGGGGGGGAUGGAUCCGUAGGUGUUGGCGCUAAGUGCCAAGGUGCUGUGGAUCCAUAGCCCCCUGUC	((((((((...((((((((((((.(.(((((((...))))))).)..))))))))))))..)))))))).	-43.3	[8, 31, 37, 61]	53	5 success	Coordinates	published		valid	2-pass					Y	none	Y	N	3
PID0481	Lin2016-hq	Rhsol	Rhi-milR-117		-	AFRT00000000.1_scaffolds	-	-	-	UCAAGGCACUGUAUGGAUGGG	-	-	-	-	-	-	5 success	Coordinates	published		secondary structure in duplex	-	-	-	-	-	-	not evaluated: hairpin invalid	-	-	-
PID0482	Lin2016-hq	Rhsol	Rhi-milR-33		KB317808.1:20210-20317:+	AFRT00000000.1_scaffolds	KB317808.1:20240-20299:+	GCA_000334115.1_Rhisol_AG1IA_1.0	gene, TE	GGGCGUAUGGUGUAG	TRUE	AUCAGGUGAAAUUCGUGAUCGACGAGGGAGCCAUGGCCAAUACAUAUUACUCUAGCAGAAAUGAUUAUGCAGGGGCGUAUGGUGUAGUGGUAUCACGCCUGAUUUGCA	((((((((...(((((.....)))))((.(((((.((.....(((((..((((.(((..........)))))))..)))))..)).))))).)).)))))))).....	-29.9	[30, 55, 68, 89]	59	5 success	Coordinates	published		valid	3-pass_rep	RF00005	9.9e-14	tRNA	tRNA	Y	PCG-CDS-exon	N	Not tested: not intergenic	4
PID0483	Lin2016-hq	Rhsol	Rhi-milR-118		KB317811.1:16418-16530:+	AFRT00000000.1_scaffolds	KB317811.1:16437-16529:+	GCA_000334115.1_Rhisol_AG1IA_1.0	gene, TE	UUCAGGAAGCAUGGAUUGGGG	TRUE	GCAGUGUUUGCAAAGAUUGGUUCAGGAAGCAUGGAUUGGGGGGCCAGUGGGAUGUCCACAUGGUCAGCACAUUGUGACAGGGUGUCUGGUUCACCAGAUUGUUUCCCAGGACA	(((.....)))........((((.(((((((....((((.(((((((.....((((.(((..((....))..)))))))......))))))).))))..)))))))..)))).	-35.1	[19, 40, 91, 111]	92	5 success	Coordinates	published		valid	3-pass_rep					Y	TE	N	Not tested: not intergenic	4
PID0484	Lin2016-hq	Rhsol	Rhi-milR-155		-	AFRT00000000.1_scaffolds	-	-	-	UGUUGUUGUACUUAGAUAGC	-	-	-	-	-	-	5 success	Coordinates	published		secondary structure in duplex	-	-	-	-	-	-	not evaluated: hairpin invalid	-	-	-
PID0485	Lin2016-hq	Rhsol	Rhi-milR-59		KB317813.1:2894-3005:-	AFRT00000000.1_scaffolds	KB317813.1:2914-2989:-	GCA_000334115.1_Rhisol_AG1IA_1.0	gene, TE	CUACCAAGGACAGAUUGUAGUGC	FALSE	GGAGGCAGGCCUGCUUUUCUACCAAGGACAGAUUGUAGUGCCCAAUGUUGGAACACUGAGAACAGACCUACUCCAAAUCUUCCAUGAUAGCCCACUAGCAGGCCACCCAGGC	...((..((((((((...(((.((.(((.((((((.((((.....((((...........))))....)))).).)))))))).)).)))......))))))))..))....	-30.6	[16, 40, 67, 91]	75	5 success	Coordinates	published		valid	1-fail					Y	TE	N	Not tested: not intergenic	4
PID0486	Lin2016-hq	Rhsol	Rhi-milR-28		KB317816.1:7608-7692:+	AFRT00000000.1_scaffolds	KB317816.1:7616-7684:+	GCA_000334115.1_Rhisol_AG1IA_1.0	gene, TE	AGGAGAUGAUCUACAGGACUAGGG	TRUE	CCUUAGAGUGAGGAGAUGAUCUACAGGACUAGGGUAACCUUCAGUAAAAGGAAGACUUAUUUUGAUGAGACUACUUACUCUUAUA	....((((((((.((....((..(((((.((((....((((......))))....)))))))))..))..)).))))))))....	-17.8	[8, 32, 55, 76]	68	5 success	Coordinates	published		valid	3-pass_rep					Y	none	Y	N	2
PID0487	Lin2016-hq	Rhsol	Rhi-milR-90		KB317817.1:12330-12409:-	AFRT00000000.1_scaffolds	KB317817.1:12340-12397:-	GCA_000334115.1_Rhisol_AG1IA_1.0	gene, TE	GGUCGUUUGCCAGAGUGGUUAAUGGGU	TRUE	AGUAGAGAGGAUGUAUAUAAUGGUGGUGAUUGACAGCUACGCCGUGGUCGUUUGCCAGAGUGGUUAAUGGGUGCCCCUGC	.((((.(.((((.(((.((((..((((((.((((.((......)).)))).)))))).....))))))).)).)))))))	-19.3	[12, 35, 44, 69]	57	5 success	Coordinates	published		valid	3-pass_rep					Y	none	Y	N	2
PID0488	Lin2016-hq	Rhsol	Rhi-milR-108		KB317821.1:19925-20001:+	AFRT00000000.1_scaffolds	KB317821.1:19930-19991:+	GCA_000334115.1_Rhisol_AG1IA_1.0	gene, TE	UAGGUGUAGCACACAGCAAAGGC	TRUE	GCAGGCCUGCUUGCAGUCUGUGCCUGGGCAGGCCCUAGCCAAGGGUAGGUGUAGCACACAGCAAAGGCCCCAUUGUG	...(((((..((((....(((((.((.((..(((((.....)))))..)).)))))))..)))))))))........	-28.8	[5, 33, 43, 66]	61	5 success	Coordinates	published		valid	3-pass_rep					Y	none	Y	N	2
PID0489	Lin2016-hq	Rhsol	Rhi-milR-15		KB317821.1:25309-25396:-	AFRT00000000.1_scaffolds	KB317821.1:25319-25388:-	GCA_000334115.1_Rhisol_AG1IA_1.0	gene, TE	UUUAGCAACUGGGACAAUGCA	TRUE	UGAAGUGCCUAGAAUGGGCUUGCAUGAACAGGUUUAGCAACUGGGACAAUGCAAUUUGGACAGACAAGCUUCUGUUGGGGACUGACAA	...(((.(((((...(((((((..((..((((((..(((..........)))))))))..))..)))))))...))))).))).....	-25.3	[8, 31, 54, 77]	69	5 success	Coordinates	published		valid	3-pass_rep					Y	none	Y	N	2
PID0490	Lin2016-hq	Rhsol	Rhi-milR-163		KB317708.1:388298-388375:+	AFRT00000000.1_scaffolds	KB317708.1:388306-388364:+	GCA_000334115.1_Rhisol_AG1IA_1.0	gene, TE	UUGACCAUGGAGACUGCUUGUGC	TRUE	CUAGAAGCAGUUGACCAUGGAGACUGCUUGUGCUAGCUAAGUUAUGAAGGAGAUCUUCUGGUUGAGGGAGUUUGGCAU	(((((..(..(((((((.(((((((.(((..(((.....)))....))).)).))))))))))))..)..)))))...	-21.4	[8, 31, 41, 66]	58	5 success	Coordinates	published		valid	3-pass_rep					Y	TE	N	Not tested: not intergenic	4
PID0491	Lin2016-hq	Rhsol	Rhi-milR-112		KB317708.1:469343-469428:+	AFRT00000000.1_scaffolds	KB317708.1:469351-469420:+	GCA_000334115.1_Rhisol_AG1IA_1.0	gene, TE	UAUGGCCGUGGAUACUUUGCAA	FALSE	UUCGAAGUCCUAUGGCCGUGGAUACUUUGCAAUCCCAAAGUGGGUAUAUAUGUGUGACUUGUAUCCAUCCCAUUAAGCACUUGGAC	.((.((((.((((((..((((((((.(((((..((((...))))........)))))...)))))))).))))..)).)))).)).	-24.2	[8, 31, 51, 77]	69	5 success	Coordinates	published		valid	1-fail					Y	none	Y	N	4
PID0492	Lin2016-hq	Rhsol	Rhi-milR-66		KB317826.1:4300-4384:-	AFRT00000000.1_scaffolds	KB317826.1:4311-4376:-	GCA_000334115.1_Rhisol_AG1IA_1.0	gene, TE	UGUUUUGUGUUGGUUUGUUCUCA	TRUE	UAAAAAUCGUGAGCAAAUCCACACAAUACACCCAGCUGUGCGCUCACCUUGGUGUUUUGUGUUGGUUUGUUCUCAAAGUAAGCGG	........(.(((((((((.((((((.(((((.((.((......)).)).))))).)))))).))))))))).)...........	-28.5	[8, 31, 50, 73]	65	5 success	Coordinates	published		valid	3-pass_rep					Y	none	Y	N	2
PID0493	Lin2016-hq	Rhsol	Rhi-milR-94		KB317826.1:4300-4384:-	AFRT00000000.1_scaffolds	KB317826.1:4310-4377:-	GCA_000334115.1_Rhisol_AG1IA_1.0	gene, TE	UGUUUUGUGUUGGUUUGUUCUCA	TRUE	UAAAAAUCGUGAGCAAAUCCACACAAUACACCCAGCUGUGCGCUCACCUUGGUGUUUUGUGUUGGUUUGUUCUCAAAGUAAGCGG	........(.(((((((((.((((((.(((((.((.((......)).)).))))).)))))).))))))))).)...........	-28.5	[7, 30, 51, 74]	67	5 success	Coordinates	published		valid	3-pass_rep					Y	none	Y	N	2
PID0494	Lin2016-hq	Rhsol	Rhi-milR-11		KB317826.1:16515-16597:-	AFRT00000000.1_scaffolds	KB317826.1:16525-16587:-	GCA_000334115.1_Rhisol_AG1IA_1.0	gene, TE	ACCAUGGACUGGUCUAGACGGG	FALSE	AUCUCUCUGACUGUCUAGCCUCGGUUCACUUCGCUCUGAGCGCAAUUCCGAACCAUGGACUGGUCUAGACGGGUCACUUCAUG	.......(((((((((((.(.(((((((.((((...((....))....))))...)))))))).)))))).))))).......	-22.7	[10, 31, 49, 72]	62	5 success	Coordinates	published		valid	1-fail					Y	none	Y	N	4
PID0495	Lin2016-hq	Rhsol	Rhi-milR-167		KB317828.1:1682-1792:-	AFRT00000000.1_scaffolds	KB317828.1:1701-1784:-	GCA_000334115.1_Rhisol_AG1IA_1.0	gene, TE	UUGGCAUCCGGGACAAGGUCUAU	TRUE	UUCAUCAAUGUGUUGUUUCAGUGCCUUGGAUUCCGCGUCGGUCACACCAUAGAUUGGACCGGGUGUGAGUUUGGCAUCCGGGACAAGGUCUAUUGCUAUAUCGUACUCCCU	.....((((((.(((((((.(((((..(((((((((.((((((.((........))))))))))).)))))))))))..))))))).)..)))))................	-30.9	[8, 30, 68, 91]	83	5 success	Coordinates	published		valid	3-pass_rep					Y	TE	N	Not tested: not intergenic	4
PID0496	Lin2016-hq	Rhsol	Rhi-milR-138		KB319031.1:384-492:+	AFRT00000000.1_scaffolds	KB319031.1:402-460:+	GCA_000334115.1_Rhisol_AG1IA_1.0	gene, TE	UGGAGGCUGCAGGUGAAC	FALSE	UUUGGCAGCUGACCUCCCAGUGGAGGCUGCAGGUGAACUGGCCUCAAAGGGCUGCAUCAUUCCAGUCCAGUUCCAUUGCAAGGGUCCUGAACUUAGUAAUAUAGUCCAC	.....(((..(((((..((((((((((((..(((((..((((((....))))))..))))).)))))....)))))))...))))))))....................	-30.9	[18, 37, 54, 76]	58	5 success	Coordinates	published		valid	1-fail					Y	none	Y	N	4
PID0497	Lin2016-hq	Rhsol	Rhi-milR-144		KB317831.1:14326-14406:+	AFRT00000000.1_scaffolds	KB317831.1:14334-14396:+	GCA_000334115.1_Rhisol_AG1IA_1.0	gene, TE	UGGGAUAUCUGCCUAGGUGAUGGU	FALSE	UUACUCCCUAUGGGAUAUCUGCCUAGGUGAUGGUGCUUUGCAUCAUCCUCUUAGUGCCAGAGGAUUUCCAGGUGGAGUUUG	..(((((((.(((((..((((((((((.((((((((...))))))))..))))).).))))....))))))).)))))...	-32.5	[8, 33, 41, 70]	62	5 success	Coordinates	published		valid	1-fail					Y	TE	N	Not tested: not intergenic	4
PID0498	Lin2016-hq	Rhsol	Rhi-milR-114		KB317831.1:15754-15831:+	AFRT00000000.1_scaffolds	KB317831.1:15762-15823:+	GCA_000334115.1_Rhisol_AG1IA_1.0	gene, TE	UAUGUGUGACAUCUGAAGGAAG	FALSE	CAGGGUGGAGUAUGUGUGACAUCUGAAGGAAGUCUUGUCUUGCUUGUUGAAGCAGAGUCUAUUGUGCAAUCUAGCCAA	..((.(((((((((...(((.(((((((.(((......))).))).......)))))))...)))))..)))).))..	-19.5	[8, 31, 38, 69]	61	5 success	Coordinates	published		valid	1-fail					Y	TE	N	Not tested: not intergenic	4
PID0499	Lin2016-hq	Rhsol	Rhi-milR-69		KB317833.1:10762-10861:-	AFRT00000000.1_scaffolds	KB317833.1:10772-10839:-	GCA_000334115.1_Rhisol_AG1IA_1.0	gene, TE	UGAGGCCUGUAGUUGUUGGAUGGG	TRUE	CUGGCCUUGCGGUCAGUAAUCACCCGUCCAACAAGGGAUUCAAUUUUGGUGACGUUGACAACCUCUUGAGGCCUGUAGUUGUUGGAUGGGUUGUGGUAUU	((((((....)))))).....((((((((((((((((..((((....(((..........)))..))))..)))....))))))))))))).........	-36.3	[22, 42, 65, 89]	67	5 success	Coordinates	published		valid	3-pass_rep					Y	none	Y	N	2
PID0500	Lin2016-hq	Rhsol	Rhi-milR-8		-	AFRT00000000.1_scaffolds	-	-	-	AAUUUGGAAGUUGUAGCCGGCUAGC	-	-	-	-	-	-	5 success	Coordinates	published		secondary structure in duplex, >20 mismatches in duplex	-	-	-	-	-	-	not evaluated: hairpin invalid	-	-	-
PID0501	Lin2016-hq	Rhsol	Rhi-milR-165		KB317709.1:12899-12970:+	AFRT00000000.1_scaffolds	KB317709.1:12907-12960:+	GCA_000334115.1_Rhisol_AG1IA_1.0	gene, TE	UUGGCAGGGUUUGGAUGUGUAUC	FALSE	CAUUGGGGGAAACACCUCCUCCAUUGCCUUUUCUUCCUAUUGGCAGGGUUUGGAUGUGUAUCUUAUGCAAAG	......((((.((((.(((.((.(((((.............)))))))...))).)))).))))........	-18.7	[8, 31, 37, 61]	53	5 success	Coordinates	published		valid	1-fail					Y	none	Y	N	4
PID0502	Lin2016-hq	Rhsol	Rhi-milR-145		KB317709.1:81551-81648:+	AFRT00000000.1_scaffolds	KB317709.1:81559-81606:+	GCA_000334115.1_Rhisol_AG1IA_1.0	gene, TE	UGGGAUGGGUGGGGGUGUUUAG	TRUE	UUGACUGGGGUGGGAUGGGUGGGGGUGUUUAGCGAUUGAUCAUUUUAUCACGUACUCUGUGAUCGAGACGGAACCCCCGCGGGGGUAUUCGUCUGUGU	.(.((.((((((.(.(((...((((((.(((.....))).)))))).)))).)))))))).)...((((((((((((....))))).)))))))....	-28.9	[8, 30, 36, 55]	47	5 success	Coordinates	published		valid	3-pass_rep					Y	PCG-CDS-exon	N	Not tested: not intergenic	4
PID0503	Lin2016-hq	Rhsol	Rhi-milR-176		KB317709.1:549448-549545:-	AFRT00000000.1_scaffolds	KB317709.1:549458-549535:-	GCA_000334115.1_Rhisol_AG1IA_1.0	gene, TE	CAUUUUGGAAUUGCUGGAUGUGGU	TRUE	UGCAAAAUAUAUUGUCAUUCACGCAAUACAUGUAGAUCAUAUGAUACAGAUUAACUAUGAAUAGCAUUUUGGAAUUGCUGGAUGUGGUGUAUCAGGUG	.((...((((((((.((((((.(((((.(((((...(((((((((....))))..)))))...)))...))..)))))))))))))))))))...)).	-18.5	[10, 30, 65, 87]	77	5 success	Coordinates	published		valid	3-pass_rep					Y	none	Y	N	2
PID0504	Lin2016-hq	Rhsol	Rhi-milR-161		KB317709.1:550505-550615:+	AFRT00000000.1_scaffolds	KB317709.1:550520-550610:+	GCA_000334115.1_Rhisol_AG1IA_1.0	gene, TE	UCUUGAGAGGUUUGGCUGGAGGC	TRUE	UCUUGGUUAGCAACACCAUCUUGAGAGGUUUGGCUGGAGGCUGUUCAUCCUCCUUGAGAUCCCAAAUGGGGGAAUUGCAGGCUUCAGUGGUAGGCUUGGUUGUUGGUGGUU	.............(((((.(....(((.(((.(((((((.((((...(((((((((......)))..))))))...)))).))))))).).)).)))....).)))))...	-38.9	[15, 39, 80, 105]	90	5 success	Coordinates	published		valid	3-pass_rep					Y	none	Y	N	2
PID0505	Lin2016-hq	Rhsol	Rhi-milR-132		KB317837.1:9796-9886:+	AFRT00000000.1_scaffolds	KB317837.1:9804-9877:+	GCA_000334115.1_Rhisol_AG1IA_1.0	gene, TE	UGAUGGGACUUCCUGAGUGGG	TRUE	AGCGAACCCCUGAUGGGACUUCCUGAGUGGGUGCCCAACGCUUUGAACCAGGAUUUGCCCAGGACUUGGGAGGAUUAUUGGGAAGAAACAA	........((((((((..(((((((((((((((.((..............))...)))))...)))))))))).)))))))).........	-24.4	[8, 29, 58, 81]	73	5 success	Coordinates	published		valid	3-pass_rep					Y	none	Y	N	2
PID0506	Lin2016-hq	Rhsol	Rhi-milR-143		KB317843.1:7809-7903:+	AFRT00000000.1_scaffolds	KB317843.1:7816-7893:+	GCA_000334115.1_Rhisol_AG1IA_1.0	gene, TE	UGGGAGUAGAAGAGAUUGAAAGU	FALSE	AAGGUACGCGCCCAGUCCUUAACUUCUUUGUUGGUUCGACAUAUAACUAAAAGACCUUCGCCUGGGAGUAGAAGAGAUUGAAAGUGUUUCACCUG	.((((((((...((((((((.((((((.((..((((................))))..))...))))))..))).)))))...))))...)))).	-23	[7, 29, 60, 84]	77	5 success	Coordinates	published		valid	1-fail					Y	none	Y	N	4
PID0507	Lin2016-hq	Rhsol	Rhi-milR-169		KB317710.1:103990-104100:-	AFRT00000000.1_scaffolds	KB317710.1:104018-104083:-	GCA_000334115.1_Rhisol_AG1IA_1.0	gene, TE	UUGGGGCAAAUAUUAGGAACUGUUG	FALSE	CACAUAGGUAACUCCUGCCUUGGGGCAAAUAUUAGGAACUGUUGUUAUCUACUAUGGUCCAAAAGUAUUGGCUCCCUCAAGUGUUUCAGUUGCCACCUAUACCUCCUGUAC	......(((((((...(((((((((..((((((.(((.((((.((.....)).)))))))...)))))).....))))))).))...))))))).................	-26.9	[17, 43, 51, 82]	65	5 success	Coordinates	published		valid	1-fail					Y	none	Y	N	4
PID0508	Lin2016-hq	Rhsol	Rhi-milR-134		KB317710.1:215939-216052:+	AFRT00000000.1_scaffolds	KB317710.1:215957-216032:+	GCA_000334115.1_Rhisol_AG1IA_1.0	gene, TE	UGCAGAGAUUGAGUUGGAUUGUG	FALSE	CAGAACUUGGAAAUUCUGGGUGCAGAGAUUGAGUUGGAUUGUGCAGCACACAUUGGGAGAACCCUUGUACACAACUGUGACAAUUGAGGGCACCCAUUUGUUAAACUCAAGUGU	....((((((.(((..(((((((...((((((((((...(((((((........(((....)))))))))))))))....)))))....)))))))...)))...).)))))..	-30.1	[18, 42, 67, 93]	75	5 success	Coordinates	published		valid	3-pass_rep					Y	none	Y	N	2
PID0509	Lin2016-hq	Rhsol	Rhi-milR-85		KB317710.1:528516-528591:-	AFRT00000000.1_scaffolds	KB317710.1:528524-528583:-	GCA_000334115.1_Rhisol_AG1IA_1.0	gene, TE	GGUGACUGUGGCUCUGAAGAGG	FALSE	UGAUCGUGGUGGUGACUGUGGCUCUGAAGAGGCAGUCUCAGCACUCUUGCUACUGCCGUUUGUUGCUCCUGGAUUC	.((((..((.((((((..((((....(((((((.......)).)))))......))))...))))))))..)))).	-21.6	[8, 31, 41, 67]	59	5 success	Coordinates	published		valid	1-fail					Y	none	Y	N	4
PID0510	Lin2016-hq	Rhsol	Rhi-milR-96		KB317847.1:3149-3233:+	AFRT00000000.1_scaffolds	KB317847.1:3160-3223:+	GCA_000334115.1_Rhisol_AG1IA_1.0	gene, TE	UAAAGUAGUAGAGACCUUGG	TRUE	UCCUGAUCACUUGCCUUGCGCUUCUCACUACCUGUUGGGUUUGUAUCAACAGCUAAAGUAGUAGAGACCUUGGCCGUGUUCUUGU	....((.(((..(((..(.(..((((((((((((((((.......))))))).....))))).))))))..))).))).))....	-23	[11, 31, 51, 74]	63	5 success	Coordinates	published		valid	3-pass_rep					Y	none	Y	N	2
PID0511	Lin2016-hq	Rhsol	Rhi-milR-3		KB317847.1:4995-5088:-	AFRT00000000.1_scaffolds	KB317847.1:5005-5066:-	GCA_000334115.1_Rhisol_AG1IA_1.0	gene, TE	AAAAGGCUGCUCAGAUCAAGAAAC	TRUE	UUGCUCACUACCCUUUGCAACCGUUUUUUCAUUGAGCUAUGUCUAGUAAUCUAUCUGCUGAAAAGGCUGCUCAGAUCAAGAAACUUUGUGAGCA	.(((((((..............(((((((..((((((...((((((((.......))))....)))).))))))...)))))))...)))))))	-21.2	[22, 47, 59, 83]	61	5 success	Coordinates	published		valid	3-pass_rep					Y	none	Y	N	2
PID0512	Lin2016-hq	Rhsol	Rhi-milR-116		KB317849.1:9511-9624:+	AFRT00000000.1_scaffolds	KB317849.1:9529-9621:+	GCA_000334115.1_Rhisol_AG1IA_1.0	gene, TE	UAUUUGCAGCGCUGGACUCUUGG	FALSE	GACUAUAUUCAAUCUUAAAGUAUUUGCAGCGCUGGACUCUUGGCUUUUGUUGUGUCUUGAGCUGGACUUUACUGGCAAUCGAGAGAGCCGUGAUGCUCGUGCUGCGGCGCUCCU	..................(((..(((((((((.((..((.((((((........(((((((((((......)))))..)))))))))))).))..)).))))))))).)))...	-34.1	[18, 42, 87, 110]	92	5 success	Coordinates	published		valid	3-pass_rep					Y	none	Y	N	2
PID0513	Lin2016-hq	Rhsol	Rhi-milR-47		KB317849.1:11259-11372:+	AFRT00000000.1_scaffolds	KB317849.1:11278-11332:+	GCA_000334115.1_Rhisol_AG1IA_1.0	gene, TE	UGGAUCCGUAGGUGUUGGC	TRUE	GUAUUGGGGAGAGAGGAAGGGCAUGGAUCCGUAGGUGUUGGCGCUAAGCGCCAAGCUACUGUGGAUCCGUAGCCCCCUGUCAAUACAAACAAGCAGUGCAACUGGACACCCAUU	....((((..((.(((..((((((((((((((((...(((((((...)))))))....)))))))))))).))))))).))............((((...))))....))))..	-48.6	[19, 43, 47, 73]	54	5 success	Coordinates	published		valid	2-pass					Y	none	Y	N	3
PID0514	Lin2016-hq	Rhsol	Rhi-milR-122		KB317851.1:107-217:-	AFRT00000000.1_scaffolds	KB317851.1:118-203:-	GCA_000334115.1_Rhisol_AG1IA_1.0	gene, TE	UUGGAAGUGGGGAUGAAGUGG	TRUE	CCUUUUGCAGAGAUUUUCUUGGAAGUGGGGAUGAAGUGGCCAAACUUGGAAAACAAAUCAAUCACCACUAAGAUAGCAUUGUGUCCCUGGGACUUGGGGAACCCUGUGAUG	....((((((.(.((((((.((...(((((((..((((......(((((..................)))))....))))..)))))))...)).)))))).)))))))..	-23.1	[14, 39, 74, 99]	85	5 success	Coordinates	published		valid	3-pass_rep					Y	none	Y	N	2
PID0515	Lin2016-hq	Rhsol	Rhi-milR-80		KB317852.1:4745-4840:-	AFRT00000000.1_scaffolds	KB317852.1:4755-4831:-	GCA_000334115.1_Rhisol_AG1IA_1.0	gene, TE	GGGCGUAUGGUGUAG	TRUE	UGAUCGGGUCUUUCCAUAGUUGCCGUGUGUUCUAUAGAUUUUUUAUACAGGUACCUACACUACAGGGCGUAUGGUGUAGUGGUAUCACGCCUGAUU	.((((((((....((((...(((((((((((((.(((......(((....)))......))).)))))))))))))..))))......))))))))	-24.9	[9, 32, 63, 85]	76	5 success	Coordinates	published		valid	3-pass_rep	RF00005	1.66e-11	tRNA	tRNA	Y	none	Y	N	4
PID0516	Lin2016-hq	Rhsol	Rhi-milR-168		KB317711.1:275026-275119:+	AFRT00000000.1_scaffolds	KB317711.1:275037-275109:+	GCA_000334115.1_Rhisol_AG1IA_1.0	gene, TE	UUGGCUUGAAUAUCUUGGUGAUGGA	TRUE	UAGGUGAGUUGACGUUCCAAGUUCAUUCUUUCUAUCCUCAAUAUGAUGUUUGUGAGGCAUUUGGCUUGAAUAUCUUGGUGAUGGAGCCCAUCGC	..((((.(((..(((((((((((((..((......(((((..(......)..))))).....))..))))...))))).)))).))).))))..	-21.5	[11, 32, 58, 83]	72	5 success	Coordinates	published		valid	3-pass_rep					Y	none	Y	N	2
PID0517	Lin2016-hq	Rhsol	Rhi-milR-10		KB317711.1:287532-287615:+	AFRT00000000.1_scaffolds	KB317711.1:287542-287605:+	GCA_000334115.1_Rhisol_AG1IA_1.0	gene, TE	ACCAGACUGCAGCAUCCUCGC	TRUE	GCUCACCGACGGCCCGGAUUGCUUCAUCUGGUAAUGCCUCACCCGGCUCUUGACCAGACUGCAGCAUCCUCGCCCUCAUCUACA	.......((.(((..((((.(((.((((((((...(((......))).....)))))).)).)))))))..))).)).......	-28.7	[10, 33, 50, 73]	63	5 success	Coordinates	published		valid	3-pass_rep					Y	PCG-CDS-exon	N	Not tested: not intergenic	4
PID0518	Lin2016-hq	Rhsol	Rhi-milR-43		KB317711.1:436320-436408:-	AFRT00000000.1_scaffolds	KB317711.1:436343-436400:-	GCA_000334115.1_Rhisol_AG1IA_1.0	gene, TE	GCAGAGUGGAUUUGUAUUGCU	TRUE	UUGUGGGUUGCAGAGUGGAUUUGUAUUGCUUUUUUUUGCAUAUUGUUGCAAUAUUAUCCAUCUGCCCUUUUUAAUUAGUCUUCCCAAAC	...((((..(((((.(((((..(((((((..................))))))).)))))))))).................))))...	-21.8	[8, 29, 46, 65]	57	5 success	Coordinates	published		valid	3-pass_rep					Y	PCG-intron	N	Not tested: not intergenic	2
PID0519	Lin2016-hq	Rhsol	Rhi-milR-9		KB317712.1:145370-145464:-	AFRT00000000.1_scaffolds	KB317712.1:145379-145456:-	GCA_000334115.1_Rhisol_AG1IA_1.0	gene, TE	ACAAUGUGGUCAAGGUCUCUG	FALSE	AGAGUUCACUACAAUGUGGUCAAGGUCUCUGCACCAUCCACUUUUUGGAAACCUUGUUAAGGCAGACCCUUUGGUGUUCAUUGUGCUUAAACCUG	((.(((...(((((((...((((((..(((((....((((.....))))............)))))..))))))....)))))))....))))).	-19.3	[8, 30, 62, 85]	77	5 success	Coordinates	published		valid	1-fail					Y	TE	N	Not tested: not intergenic	4
PID0520	Lin2016-hq	Rhsol	Rhi-milR-72		KB317865.1:359-471:+	AFRT00000000.1_scaffolds	KB317865.1:363-450:+	GCA_000334115.1_Rhisol_AG1IA_1.0	gene, TE	GCAGGCAAAAUCUGGAAGAAGGC	FALSE	CUCUGCCUUCCACUCAUAGAUCUCCCCACUCCUUGUACUGUUACCAUGCUCAAUGGGUCAAGCCUCAAGGCAGGCAAAAUCUGGAAGAAGGCAAAUUUUACCUUCUCCUUUGA	...(((((((...((.(((((....((...(((((..((....((((.....))))....))...)))))..))....))))))).)))))))....................	-26.2	[4, 32, 67, 91]	87	5 success	Coordinates	published		valid	1-fail					Y	TE	N	Not tested: not intergenic	4
PID0521	Lin2016-hq	Rhsol	Rhi-milR-139		KB317871.1:2028-2137:-	AFRT00000000.1_scaffolds	KB317871.1:2040-2125:-	GCA_000334115.1_Rhisol_AG1IA_1.0	gene, TE	UGGCAUCUGUCAUGCUGUAGAGGG	FALSE	GAGUGUGGCGGACUUGGCAUCUGUCAUGCUGUAGAGGGGUGAAUUGAGGGGUCCUUCUUCUGUGAGUUCAAUGCCAAUAUCAUAGUGCCAGUGCUGAGGGAGCUUAUUGA	.((((.(((...(((((((.(((.(((..((((..((.(((((((.(.(((.......))).).))))).)).))..)).))..))).))))))))))...)))))))..	-31.2	[12, 37, 72, 97]	85	5 success	Coordinates	published		valid	1-fail					Y	none	Y	N	4
PID0522	Lin2016-hq	Rhsol	Rhi-milR-4		KB319457.1:244-354:-	AFRT00000000.1_scaffolds	KB319457.1:264-334:-	GCA_000334115.1_Rhisol_AG1IA_1.0	gene, TE	AACAGAUUGCCACAAGGGAGAGG	FALSE	GGAACUCAACUGGAAUGAUGCCACCCUUUGUGGCCAAUUUGCAAGUGGACUUCACUGGGAGGUCUGGAAACAGAUUGCCACAAGGGAGAGGCAACCCCAAACCUUGAGGGA	....(((((.(((...(.((((.(((((((((((.((((((....((((((((.....))))))))....)))))))))))))))).).)))).).)))....)))))...	-42.7	[20, 44, 66, 90]	70	5 success	Coordinates	published		valid	1-fail					Y	none	Y	N	4
PID0523	Lin2016-hq	Rhsol	Rhi-milR-62		KB317713.1:120946-121014:-	AFRT00000000.1_scaffolds	KB317713.1:120956-121006:-	GCA_000334115.1_Rhisol_AG1IA_1.0	gene, TE	CCUGGAGUGUUGCGGCUUUGG	TRUE	GGGAUGUGUCCUGGAGUGUUGCGGCUUUGGGACUGUUCCCAGAGUUGGUAGCCACGGGACUCGUCCCAG	((((((.((((((..((....(((((((((((....)))))))))))...))..)))))).))))))..	-40.9	[8, 29, 38, 58]	50	5 success	Coordinates	published		valid	3-pass_rep					Y	PCG-CDS-exon	N	Not tested: not intergenic	4
PID0524	Lin2016-hq	Rhsol	Rhi-milR-162		KB317713.1:209848-209946:-	AFRT00000000.1_scaffolds	KB317713.1:209856-209938:-	GCA_000334115.1_Rhisol_AG1IA_1.0	gene, TE	UGAACGAAAAGUGGCUGGCAU	TRUE	CCAACAAGAGUUGAACGAAAAGUGGCUGGCAUUACCUCAAGAAACGCGUAAUGGCGUCAAGCAUGGUGCCAUGGCCACUCUUGGUUCUCCACAGCCUAG	............((((.((.((((((((((((((.........((((......))))......)))))))..))))))).)).))))............	-29.6	[8, 31, 65, 90]	82	5 success	Coordinates	published		valid	2-pass					Y	PCG-CDS-exon	N	Not tested: not intergenic	4
PID0525	Lin2016-hq	Rhsol	Rhi-milR-123		KB319500.1:567-662:-	AFRT00000000.1_scaffolds	KB319500.1:568-659:-	GCA_000334115.1_Rhisol_AG1IA_1.0	gene, TE	UGUGAAAAAGGAAGCGUGCUGC	TRUE	ACAUGUGAAAAAGGAAGCGUGCUGCAGAUUGCGCUGGAGCGUGGAUUUCUCCUAAGCGCACUUGGCACAGUAACUUGGCACGGCAUCUUGGCAUAA	...((((....((((.((((((((...((((.(((((.(((((((....)))...))))..))))).))))....)))))).)).))))..)))).	-27	[3, 25, 73, 94]	91	5 success	Coordinates	published		valid	3-pass_rep					Y	none	Y	N	2
PID0526	Lin2016-hq	Rhsol	Rhi-milR-65		-	AFRT00000000.1_scaffolds	-	-	-	GAGACUUUUGAACCUGACCUGGCC	-	-	-	-	-	-	5 success	Coordinates	published		secondary structure in duplex, >20 mismatches in duplex	-	-	-	-	-	-	not evaluated: hairpin invalid	-	-	-
PID0527	Lin2016-hq	Rhsol	Rhi-milR-82		KB317714.1:419185-419266:-	AFRT00000000.1_scaffolds	KB317714.1:419192-419258:-	GCA_000334115.1_Rhisol_AG1IA_1.0	gene, TE	UGGGAUACCUGUAUGAAUUGGCGG	TRUE	UUCCAUUCGUGGGAUACCUGUAUGAAUUGGCGGAAAGGCUUUCAGAGGCCAAGCCAGCCGAUUGGGCAAUCCCAGACCCAAA	......((.((((((...(((.(.(((((((((...(((((....)))))...)).))))))).))))))))))))......	-27	[8, 29, 57, 74]	66	5 success	Coordinates	published		valid	2-pass					Y	PCG-CDS-exon	N	Not tested: not intergenic	4
PID0528	Lin2016-hq	Rhsol	Rhi-milR-158		KB317887.1:4464-4546:+	AFRT00000000.1_scaffolds	KB317887.1:4472-4535:+	GCA_000334115.1_Rhisol_AG1IA_1.0	gene, TE	UUAGGAGGUAUAGGUGGACUGG	TRUE	AAAACAGCCAUUAGGAGGUAUAGGUGGACUGGUUUAACCUUGCCAGGCAAGUUCUUGCUGUAAGUUCUCAUGGCAACUCCUUC	......(((((.((((..(((((..((((((((........)))))......)))..)))))..)))).))))).........	-21.6	[8, 30, 43, 71]	63	5 success	Coordinates	published		valid	3-pass_rep					Y	none	Y	N	2
PID0529	Lin2016-hq	Rhsol	Rhi-milR-79		KB317697.1:402820-402898:-	AFRT00000000.1_scaffolds	KB317697.1:402830-402894:-	GCA_000334115.1_Rhisol_AG1IA_1.0	gene, TE	UGGAUUCGCUGUCGCACUUUUGA	TRUE	CCCGUCAAAAGAGCGAUCUCGGAUUCAAGGCUGCCAUCGCAGCUACUGGAUUCGCUGUCGCACUUUUGAUGGUGUUCCU	.((((((((((.(((((..((((((((.((((((....))))))..))))))))..))))).)))))))))).......	-39.3	[4, 27, 45, 68]	64	5 success	Coordinates	published		valid	2-pass					Y	PCG-CDS-exon	N	Not tested: not intergenic	4
PID0530	Lin2016-hq	Rhsol	Rhi-milR-171		-	AFRT00000000.1_scaffolds	-	-	-	UUGUAGGUUUCUGUAGGCAGGC	-	-	-	-	-	-	5 success	Coordinates	published		secondary structure in duplex	-	-	-	-	-	-	not evaluated: hairpin invalid	-	-	-
PID0531	Lin2016-hq	Rhsol	Rhi-milR-35		-	AFRT00000000.1_scaffolds	-	-	-	AGUUCUGCUUCCGAAGGCGUGUU	-	-	-	-	-	-	5 success	Coordinates	published		secondary structure in duplex	-	-	-	-	-	-	not evaluated: hairpin invalid	-	-	-
PID0532	Lin2016-hq	Rhsol	Rhi-milR-88		KB317905.1:239-347:+	AFRT00000000.1_scaffolds	KB317905.1:261-331:+	GCA_000334115.1_Rhisol_AG1IA_1.0	gene, TE	UAGUAGUACGGCUGUAAGCGC	TRUE	UAGAUAAGCAGUAGGUUGUCUUAUGCAACAGUAGUAUAGCCUAGAUAGAGUAGAUUACAUAAGUCUCAAGUGUAGUAGUACGGCUGUAAGCGCCCGCUCCCACCAGCGU	.((((((.(....).))))))...((.(((((.((((.((.((.((...(.(((((.....))))))..)).)))).)))).)))))..))...((((......)))).	-22.1	[22, 45, 69, 92]	70	5 success	Coordinates	published		valid	2-pass					Y	none	Y	N	3
PID0533	Lin2016-hq	Rhsol	Rhi-milR-31		-	AFRT00000000.1_scaffolds	-	-	-	AGGGCGAGUUUUGGCAGUGAGA	-	-	-	-	-	-	2 invalid_coords	Fail/lacking	recovered		recovered no valid hairpins	-	-	-	-	-	-	not evaluated: hairpin invalid	-	-	-
PID0534	Lin2016-hq	Rhsol	Rhi-milR-46		KB317913.1:207-317:-	AFRT00000000.1_scaffolds	KB317913.1:228-313:-	GCA_000334115.1_Rhisol_AG1IA_1.0	gene, TE	UCAAGGCACUGGAGGAAUGGCA	TRUE	ACAUGUCAAAAUCCUUCUCUGGUGCCAAAGCCAACUAUGAUACACACAAUAAAGAAUUGUUGGCCAUCAUCAAGGCACUGGAGGAAUGGCAAAUCUUCUUAGAAGCAACAG	...(((((...((((((...((((((...((((((.......................)))))).........)))))))))))).)))))...((((...))))......	-26.2	[4, 33, 65, 89]	85	5 success	Coordinates	published		valid	2-pass					Y	none	Y	N	3
PID0535	Lin2016-hq	Rhsol	Rhi-milR-34		KB317717.1:9573-9645:-	AFRT00000000.1_scaffolds	KB317717.1:9583-9635:-	GCA_000334115.1_Rhisol_AG1IA_1.0	gene, TE	AGGGGUGGCUGUUGAAUUGAG	FALSE	UUACACAGUGGUGGUUCUUUAGCCAGCUUCAUUACCAUUGACAGGGGUGGCUGUUGAAUUGAGCACAAAUUUU	.......(((.((((((..((((((.(((((.......)))...)).))))))..))))).).))).......	-19	[10, 28, 40, 62]	52	5 success	Coordinates	published		valid	1-fail					Y	none	Y	N	4
PID0536	Lin2016-hq	Rhsol	Rhi-milR-135		-	AFRT00000000.1_scaffolds	-	-	-	UGGAAAUGGGAAGAAAGGGAGCGGG	-	-	-	-	-	-	2 invalid_coords	Fail/lacking	recovered		recovered no valid hairpins	-	-	-	-	-	-	not evaluated: hairpin invalid	-	-	-
PID0537	Lin2016-hq	Rhsol	Rhi-milR-170		KB317719.1:384600-384708:+	AFRT00000000.1_scaffolds	KB317719.1:384618-384686:+	GCA_000334115.1_Rhisol_AG1IA_1.0	gene, TE	UUGGGGUGCUUGUAGACAUU	FALSE	GCCAGUACAUCAAUCCCCUCUUGGGGUGCUUGUAGACAUUGCACUUGAUGAAUCUCAUCUUGUUCUAGCUGCUGGUGCUCAUCAGGCCAUGUAUGAUGUUGGCAGUGCU	((((..((((((.......(((((((((((.((((.....(((...(((((...))))).))).....)))).)))))))..)))).......))))))))))......	-31.8	[18, 39, 63, 86]	68	5 success	Coordinates	published		valid	1-fail					Y	TE	N	Not tested: not intergenic	4
PID0538	Lin2016-hq	Rhsol	Rhi-milR-156		KB317719.1:400525-400635:-	AFRT00000000.1_scaffolds	KB317719.1:400546-400618:-	GCA_000334115.1_Rhisol_AG1IA_1.0	gene, TE	UGGCGGACUAUGUGAAUACAGC	TRUE	ACCAGCUAUACUACGGUGACCAAGGCCAUAAGGGCAGUGGCGGACUAUGUGAAUACAGCAAAGAAGCCACUUAAGGCGGUGUGGAUGGUACAAACUAAGUAGUUGCUGGGC	.(((((...(((((..((((((...(((((..(.(((((((...((.(((.......))).))..))))))...).)..))))).)))).))......))))).)))))..	-35.5	[17, 37, 68, 89]	72	5 success	Coordinates	published		valid	3-pass_rep					Y	none	Y	N	2
PID0539	Lin2016-hq	Rhsol	Rhi-milR-61		-	AFRT00000000.1_scaffolds	-	-	-	CUGCAUGGAACACUGGAGGAUGGG	-	-	-	-	-	-	5 success	Coordinates	published		secondary structure in duplex, >20 mismatches in duplex	-	-	-	-	-	-	not evaluated: hairpin invalid	-	-	-
PID0540	Lin2016-hq	Rhsol	Rhi-milR-173		KB317951.1:1795-1889:-	AFRT00000000.1_scaffolds	KB317951.1:1808-1881:-	GCA_000334115.1_Rhisol_AG1IA_1.0	gene, TE	UUUGUGGGGUCAGAGUUUGUAGUG	TRUE	ACUUCUUGGUUUGUGGGGUCAGAGUUUGUAGUGUUAGUCAUUUUUCAAUUGUUUUCACACUGUACAAACUCAGUGCUCCACCCAGUGCCUGAUGC	.....((((...((((((((.(((((((((((((....((.........)).....)))))..)))))))).).)))))))))))..........	-25	[8, 32, 57, 81]	73	5 success	Coordinates	published		valid	3-pass_rep					Y	none	Y	N	2
PID0541	Lin2016-hq	Rhsol	Rhi-milR-58		KB317721.1:245781-245852:+	AFRT00000000.1_scaffolds	KB317721.1:245789-245847:+	GCA_000334115.1_Rhisol_AG1IA_1.0	gene, TE	CGUGAACGAGAACGAGAGCGGGA	TRUE	UUCGGCCAUUCGUGAACGAGAACGAGAGCGGGAUUCGAUGCCCCGCGAACGUGAACGUGAACGCGACCUGAU	.((((....(((((.(((...(((...(((((.........)))))...)))...)))...))))).)))).	-21.4	[8, 31, 41, 66]	58	5 success	Coordinates	published		valid	3-pass_rep					Y	PCG-CDS-exon	N	Not tested: not intergenic	4
PID0542	Lin2016-hq	Rhsol	Rhi-milR-104		KB317721.1:394627-394707:-	AFRT00000000.1_scaffolds	KB317721.1:394637-394699:-	GCA_000334115.1_Rhisol_AG1IA_1.0	gene, TE	UUAGAAUGGGCUGGGAAUAUUAGU	TRUE	CCAGGGCAUUUUGUAUUUUGGGCUCCAUCUGGCUGAUUGCGCUUGGGUUAGAAUGGGCUGGGAAUAUUAGUAUAAGGUUUC	............(((((((.(((.((((((((((.(.......).)))))).))))))).)))))))..............	-21.4	[8, 32, 46, 70]	62	5 success	Coordinates	published		valid	3-pass_rep					Y	none	Y	N	2
PID0543	Lin2016-hq	Rhsol	Rhi-milR-92		KB317722.1:148126-148212:-	AFRT00000000.1_scaffolds	KB317722.1:148136-148205:-	GCA_000334115.1_Rhisol_AG1IA_1.0	gene, TE	UGUGUUUGGUUACUUUGCUUGCAG	TRUE	AGGAAGUUUGUAAGCAAGAUAACAAAAUACACCAGGCUGUACGCUCACCUUGGUGUGUUUGGUUACUUUGCUUGCAGGGUCAACCAU	.((.(.((((((((((((.((((.((((((((((((.((......)).)))))))))))).)))).)))))))))))).)...))..	-36.4	[7, 31, 52, 76]	69	5 success	Coordinates	published		valid	3-pass_rep					Y	PCG-intron	N	Not tested: not intergenic	2
PID0544	Lin2016-hq	Rhsol	Rhi-milR-36		KB317722.1:154648-154734:-	AFRT00000000.1_scaffolds	KB317722.1:154658-154727:-	GCA_000334115.1_Rhisol_AG1IA_1.0	gene, TE	UAUGAUGUGUUGAUUUGUUUGCAG	TRUE	AGGAAGUUUGUAAGCAAGUUAACAUAACAUACCAAGUUGUAAGCUCACCUUGGUAUGAUGUGUUGAUUUGUUUGCAGAGCUGGCCAU	.((.((((((((((((((((((((((.(((((((((.((......)).))))))))).)))))))))))))))))))).))..))..	-40.8	[7, 31, 52, 76]	69	5 success	Coordinates	published		valid	3-pass_rep					Y	none	Y	N	2
PID0545	Lin2016-hq	Rhsol	Rhi-milR-73		KB317722.1:189954-190067:+	AFRT00000000.1_scaffolds	KB317722.1:189979-190045:+	GCA_000334115.1_Rhisol_AG1IA_1.0	gene, TE	UGCAUUUUGUUGAUUUGUUUGCAG	TRUE	GCAGGACGAAGCACACAAGGGGGAGGUAAGCAAGUUAACACAAUACACCAGGCUGUAUGCUUUACCUUGGUGCAUUUUGUUGAUUUGUUUGCAGGGCUGGCAACGACAGUCAUA	((........)).............(((((((((((((((.(((.(((((((..(((.....)))))))))).))).)))))))))))))))..(((((.......)))))...	-36.1	[25, 47, 69, 91]	66	5 success	Coordinates	published		valid	3-pass_rep					Y	PCG-intron	N	Not tested: not intergenic	2
PID0546	Lin2016-hq	Rhsol	Rhi-milR-60		KB317723.1:122197-122265:+	AFRT00000000.1_scaffolds	KB317723.1:122207-122255:+	GCA_000334115.1_Rhisol_AG1IA_1.0	gene, TE	AACUAUAUCGCAAGCUUGAGAGAG	TRUE	UUAGUCUUACUCUAUUUGGCGGCGAUAUAUCUUAUCAACUAUAUCGCAAGCUUGAGAGAGCUUGGGAUA	...((((((((((....(((.((((((((..........))))))))..)))....))))..)))))).	-20.1	[10, 31, 36, 58]	48	5 success	Coordinates	published		valid	3-pass_rep					Y	PCG-CDS-exon	N	Not tested: not intergenic	4
PID0547	Lin2016-hq	Rhsol	Rhi-milR-160		KB317723.1:322390-322465:-	AFRT00000000.1_scaffolds	KB317723.1:322398-322457:-	GCA_000334115.1_Rhisol_AG1IA_1.0	gene, TE	GUUAGUUCCAAUUUCGUGUCCGG	TRUE	GAGAAGAAGGUUAGUUCCAAUUUCGUGUCCGGACCAACGCAAGCUGACCCGAUUUUGGGACUAGUACCUUCUUAAA	...(((((((((((((((((..(((.(((((......))......))).)))..)))))))))..))))))))...	-28.7	[8, 31, 36, 67]	59	5 success	Coordinates	published		valid	3-pass_rep					Y	PCG-CDS-exon	N	Not tested: not intergenic	4
PID0548	Lin2016-hq	Rhsol	Rhi-milR-48		KB317724.1:182714-182791:+	AFRT00000000.1_scaffolds	KB317724.1:182725-182783:+	GCA_000334115.1_Rhisol_AG1IA_1.0	gene, TE	CAUGGGCAUGUUGGGAGAUGGUAA	TRUE	CCCUAUAGAUACGCCAACUCGAGACAUACCUAUGCGUUCCCUCGUAUCAUGGGCAUGUUGGGAGAUGGUAAGACGGUC	............((((.(((..(((((.((((((((......))...)))))).)))))..))).)))).........	-21.6	[11, 35, 45, 69]	58	5 success	Coordinates	published		valid	2-pass					Y	PCG-CDS-exon	N	Not tested: not intergenic	4
PID0549	Lin2016-hq	Rhsol	Rhi-milR-121		-	AFRT00000000.1_scaffolds	-	-	-	UCUAGCUGGAGAGACAUUGUGG	-	-	-	-	-	-	5 success	Coordinates	published		secondary structure in duplex	-	-	-	-	-	-	not evaluated: hairpin invalid	-	-	-
PID0550	Lin2016-hq	Rhsol	Rhi-milR-105		KB317724.1:346964-347033:+	AFRT00000000.1_scaffolds	KB317724.1:346972-347024:+	GCA_000334115.1_Rhisol_AG1IA_1.0	gene, TE	UAGCAGAACACUGGGGAGAAGCAG	FALSE	GCAGUGAUCCUAGCAGAACACUGGGGAGAAGCAGAUCCUGUUCCAGGUGCCGGUAUGCUGGAUGCACUGG	.(((((((((.((((...((((..(((...((((...))))))).))))......)))))))).))))).	-24.6	[8, 33, 37, 60]	52	5 success	Coordinates	published		valid	3-pass_rep					Y	none	Y	N	2
PID0551	Lin2016-hq	Rhsol	Rhi-milR-151		KB317725.1:222135-222234:+	AFRT00000000.1_scaffolds	KB317725.1:222151-222224:+	GCA_000334115.1_Rhisol_AG1IA_1.0	gene, TE	UGUAUUUUGUUGAUCCGCUUGCAG	TRUE	UUAGCCUGGGAAAAAUGGUAAGCAGGUCAACACAAUACACCAACCUUUAAGCUGGAACUCACCAUGGUGUAUUUUGUUGAUCCGCUUGCAGGGCUGGCCA	.((((((..........((((((.((((((((.(((((((((..........(((......)))))))))))).)))))))).)))))).))))))....	-36.6	[16, 40, 65, 89]	73	5 success	Coordinates	published		valid	3-pass_rep					Y	PCG-intron	N	Not tested: not intergenic	2
PID0552	Lin2016-hq	Rhsol	Rhi-milR-18		KB317725.1:269059-269158:-	AFRT00000000.1_scaffolds	KB317725.1:269069-269148:-	GCA_000334115.1_Rhisol_AG1IA_1.0	gene, TE	UAGAGAACUAUAACCAGACAAGGC	TRUE	UGUUUCCAAAGCCUGCUGGUCAUGGUUAUCAAGUGUUACAUGUGAGGCCAGAAAUCUUGCAGAUAGUAGAGAACUAUAACCAGACAAGGCCACUUGCUGG	..........((((((((((.((((((.((.(.((((...(((((((.......))))))))))).).)).)))))).))))).).))))..........	-25.6	[10, 32, 65, 89]	79	5 success	Coordinates	published		valid	3-pass_rep					Y	none	Y	N	2
PID0553	Lin2016-hq	Rhsol	Rhi-milR-24		KB317725.1:309196-309288:-	AFRT00000000.1_scaffolds	KB317725.1:309204-309280:-	GCA_000334115.1_Rhisol_AG1IA_1.0	gene, TE	AGGAACUGCCAGCAGGGUGGGC	FALSE	CCCCCCCCCCAGGAACUGCCAGCAGGGUGGGCCCAGAUGUUUUUGGCAAUGUUGCCAAGUUUUACAACCUUGCUGGCAACCUUGGCUAGCCCU	........(((((...((((((((((((.(....((((....((((((....))))))))))..).))))))))))))..)))))........	-33.5	[8, 31, 62, 84]	76	5 success	Coordinates	published		valid	1-fail					Y	none	Y	N	4
PID0554	Lin2016-hq	Rhsol	Rhi-milR-95		KB317725.1:314756-314827:-	AFRT00000000.1_scaffolds	KB317725.1:314758-314825:-	GCA_000334115.1_Rhisol_AG1IA_1.0	gene, TE	UUAAAGACUGUUGUGAGAGAAGG	TRUE	GUUCCUUCUUCAACCUUGACAGUUAUUUUGUGUCACAACUAAGACUUAAAGACUGUUGUGAGAGAAGGCGAC	((((((((((..((...(((((((..((((.(((........))).)))))))))))))..))))))).)))	-19.8	[2, 31, 44, 69]	67	3 invalid_sequence	Fail/lacking	recovered		valid	3-pass_rep					Y	none	Y	N	2
PID0555	Lin2016-hq	Rhsol	Rhi-milR-102		KB317725.1:327334-327414:+	AFRT00000000.1_scaffolds	KB317725.1:327342-327409:+	GCA_000334115.1_Rhisol_AG1IA_1.0	gene, TE	UACUUCCAGUUGACUUUGAAUG	FALSE	CUGGUAGCCAUACUUCCAGUUGACUUUGAAUGCAAAACUGGGUACUCAAGGUACCAGUCAGAGUCAAUUAAGUUGUUCAGA	((((..((...((((..((((((((((((........((((.((((...)))))))))))))))))))))))).)))))).	-22.4	[8, 31, 54, 75]	67	5 success	Coordinates	published		valid	1-fail					Y	none	Y	N	4
PID0556	Lin2016-hq	Rhsol	Rhi-milR-87		KB317726.1:196496-196608:-	AFRT00000000.1_scaffolds	KB317726.1:196545-196592:-	GCA_000334115.1_Rhisol_AG1IA_1.0	gene, TE	GUAACAAGUGACGGACAGGGCUA	FALSE	CGCGCAAUAUUUUCCCUCGUAACAAGUGACGGACAGGGCUAUUCCCAUUGUCCGUGCUUGCCGUGGUAAAAGUUGUUUGGUCGUACCCUCGUCCCAAUGCUUGGCUUCAUGUU	...(((((.((((.((.((...(((((.((((((((((.....)))..)))))))))))).)).)).)))))))))((((.((......))..))))................	-30	[16, 40, 40, 63]	47	5 success	Coordinates	published		valid	3-pass_rep					Y	PCG-CDS-exon	N	Not tested: not intergenic	4
PID0557	Lin2016-hq	Rhsol	Rhi-milR-67		KB317727.1:55054-55139:-	AFRT00000000.1_scaffolds	KB317727.1:55065-55131:-	GCA_000334115.1_Rhisol_AG1IA_1.0	gene, TE	CGAGCUGUUUUCGUACUUGUGGACU	TRUE	UAUCUUCUUCGAGCUGUUUUCGUACUUGUGGACUUCCCAAGUUAUUGGUAAUGUCUGUUUGGCGACGAUGGCCGGUGGCCCUUAUG	.....((.(((.((((((.((((......((((((.((((....)))).)).)))).....)))).))))))))).))........	-20.1	[8, 33, 50, 74]	66	5 success	Coordinates	published		valid	3-pass_rep					Y	PCG-CDS-exon	N	Not tested: not intergenic	4
PID0558	Lin2016-hq	Rhsol	Rhi-milR-70		KB317727.1:129658-129736:-	AFRT00000000.1_scaffolds	KB317727.1:129668-129726:-	GCA_000334115.1_Rhisol_AG1IA_1.0	gene, TE	GAUGAUCUUAAGGCUGCAUACGA	FALSE	UGUCGAAGGAACGUAUGCAUGCUUCAAAUCGUCCUGUACCACCCCAGAUGAUCUUAAGGCUGCAUACGACAUGUCAUCA	((..((.....((((((((.((((.((((((((.((........)))))))).)).)))))))))))).....))..))	-21.3	[10, 35, 44, 68]	58	5 success	Coordinates	published		valid	3-pass_rep					Y	PCG-CDS-exon	N	Not tested: not intergenic	4
PID0559	Lin2016-hq	Rhsol	Rhi-milR-152		KB317727.1:132052-132150:+	AFRT00000000.1_scaffolds	KB317727.1:132061-132140:+	GCA_000334115.1_Rhisol_AG1IA_1.0	gene, TE	UGUGGCUUGGAGCUGGCAAGGA	FALSE	UAGACCAUCAUCUUGUUCUGCAGCUCUAAGCUCUACAGUAUUGACUAUUUUAGUGACAAAUGUACAGUGUGGCUUGGAGCUGGCAAGGAGUCACAGCAC	..(((.....((((((....((((((((((((.(((.(((((.((((...)))).).....)))).))).)))))))))))))))))).))).......	-30.4	[9, 36, 65, 88]	79	5 success	Coordinates	published		valid	1-fail					Y	none	Y	N	4
PID0560	Lin2016-hq	Rhsol	Rhi-milR-172		KB317727.1:133079-133162:+	AFRT00000000.1_scaffolds	KB317727.1:133087-133153:+	GCA_000334115.1_Rhisol_AG1IA_1.0	gene, TE	UUGUGGGGACUCUGUUAUAGGA	TRUE	UCCAGUAUUGUUGUGGGGACUCUGUUAUAGGACAGGUUUAUGAUAACCUGAUCUGUGACUUGGGCACCCACUGCCAUUGUAUUC	..((((...((.(((((..(((.((((((((.((((((......)))))).))))))))..)))..))))).)).)))).....	-32	[8, 30, 51, 74]	66	5 success	Coordinates	published		valid	3-pass_rep					Y	PCG-CDS-exon	N	Not tested: not intergenic	4
PID0561	Lin2016-hq	Rhsol	Rhi-milR-42		KB317729.1:118633-118711:+	AFRT00000000.1_scaffolds	KB317729.1:118641-118702:+	GCA_000334115.1_Rhisol_AG1IA_1.0	gene, TE	CACGGUCUGUCCACCAAGAGC	TRUE	AGCCUCUUCCCACGGUCUGUCCACCAAGAGCAAGUUCACGAUCACUCCUGGAUCGGAGCAGGUCCGUGCCACCAUUGCC	.((.......((((((((((((.(((.(((..(........)..))).)))...))).)))).)))))........)).	-20.1	[8, 29, 44, 69]	61	5 success	Coordinates	published		valid	3-pass_rep					Y	PCG-CDS-exon	N	Not tested: not intergenic	4
PID0562	Lin2016-hq	Rhsol	Rhi-milR-100		KB318038.1:806-883:-	AFRT00000000.1_scaffolds	KB318038.1:814-875:-	GCA_000334115.1_Rhisol_AG1IA_1.0	gene, TE	UAAUUGUUUGUACUCAGUGGC	FALSE	CUUAAGGGGUUAAUUGUUUGUACUCAGUGGCCACAAGCACCAGCUACUGGCUAACUGCUACUGUCAUGACCCACUCCA	....((((((((..((...(((..(((((((((..(((....)))..))))).)))).)))...)))))))).))...	-24.2	[8, 30, 49, 69]	61	5 success	Coordinates	published		valid	1-fail					Y	none	Y	N	4
PID0563	Lin2016-hq	Rhsol	Rhi-milR-27		KB317730.1:113067-113145:-	AFRT00000000.1_scaffolds	KB317730.1:113077-113136:-	GCA_000334115.1_Rhisol_AG1IA_1.0	gene, TE	GAAAGGAGACUAGAGAACAAGUUG	TRUE	UUCCUCUGGAUGACUUUGUCGCUAAGCUUCUUUCACUCAAGACAGAAAGGAGACUAGAGAACAAGUUGUUGUAGAUCUG	....((((((((((((..((.(((..((((((((..........))))))))..))).))..)))))))).))))....	-20.1	[9, 32, 45, 68]	59	5 success	Coordinates	published		valid	3-pass_rep					Y	PCG-CDS-exon	N	Not tested: not intergenic	4
PID0564	Lin2016-hq	Rhsol	Rhi-milR-127		-	AFRT00000000.1_scaffolds	-	-	-	UGAGCAAAUUCAGCCAGUGGGAG	-	-	-	-	-	-	5 success	Coordinates	published		secondary structure in duplex, >20 mismatches in duplex	-	-	-	-	-	-	not evaluated: hairpin invalid	-	-	-
PID0565	Lin2016-hq	Rhsol	Rhi-milR-30		KB317732.1:17496-17604:+	AFRT00000000.1_scaffolds	KB317732.1:17508-17588:+	GCA_000334115.1_Rhisol_AG1IA_1.0	gene, TE	AGGGACUGUCCAAUGCUAGGUG	FALSE	AGUCAGCAGAUCCACCUGCUUGCAGAAAGCCUGCUCUACAUCACACCUGCUCAUGGCUGUGGAUUAGUGGUAGGGACUGUCCAAUGCUAGGUGGUUGAUGCAAACUCUU	(((..(((...((((((((((((((....(((((((((.(((.(((..(((...))).))))))))).))))))..)))..))).)).))))))....)))..)))...	-35.9	[12, 33, 69, 92]	80	5 success	Coordinates	published		valid	1-fail					Y	none	Y	N	4
PID0566	Lin2016-hq	Rhsol	Rhi-milR-150		-	AFRT00000000.1_scaffolds	-	-	-	UGGUCUGAAAAGGAACAAGGGGCCU	-	-	-	-	-	-	5 success	Coordinates	published		secondary structure in duplex, >20 mismatches in duplex	-	-	-	-	-	-	not evaluated: hairpin invalid	-	-	-
PID0567	Lin2016-hq	Rhsol	Rhi-milR-76		KB317734.1:29481-29570:-	AFRT00000000.1_scaffolds	KB317734.1:29506-29562:-	GCA_000334115.1_Rhisol_AG1IA_1.0	gene, TE	GGCGGAUCUCGAACUCGAAGC	TRUE	UGCUUCCAUGGCGGAUCUCGAACUCGAAGCUGAUAUCGAUCGUGCUUUGGGCCGAACUCCAGCUCCCCCGACCGUUACCAGCGAAAGCGA	(((((....((((((..(((..((((((((((((....)))).)))))))).)))..))).)))........((((...)))).))))).	-23.5	[8, 29, 43, 64]	56	5 success	Coordinates	published		valid	3-pass_rep					Y	PCG-CDS-exon	N	Not tested: not intergenic	4
PID0568	Lin2016-hq	Rhsol	Rhi-milR-55		KB317699.1:416163-416235:+	AFRT00000000.1_scaffolds	KB317699.1:416171-416222:+	GCA_000334115.1_Rhisol_AG1IA_1.0	gene, TE	CGGCUACUUGGGCGAUCUCGCUG	TRUE	AGAAACUUCUCGGCUACUUGGGCGAUCUCGCUGUGAACGGCAGUUCGAUCAAGGGCCAAAUGGUAGGGUUCCC	....(((....((((.((((..(((.((.((((....)))))).)))..))))))))....))).........	-21	[8, 31, 38, 59]	51	5 success	Coordinates	published		valid	3-pass_rep					Y	PCG-CDS-exon	N	Not tested: not intergenic	4
PID0569	Lin2016-hq	Rhsol	Rhi-milR-107		KB317737.1:56848-56919:+	AFRT00000000.1_scaffolds	KB317737.1:56856-56911:+	GCA_000334115.1_Rhisol_AG1IA_1.0	gene, TE	UAGGCUACUUGGACCACCUGGAG	FALSE	GUUGCGUUCAUAGGCUACUUGGACCACCUGGAGGCUUGCCCAGUCUGUCACGAGUUGCGCUUUGACUCGGCU	((((.((.((.((((.((((((((...((((........))))...))).))))).)).)).)))).)))).	-23.4	[8, 32, 37, 63]	55	5 success	Coordinates	published		valid	1-fail					Y	near-TE	N	Not tested: not intergenic	4
PID0570	Lin2016-hq	Rhsol	Rhi-milR-142		KB317737.1:58489-58563:+	AFRT00000000.1_scaffolds	KB317737.1:58499-58553:+	GCA_000334115.1_Rhisol_AG1IA_1.0	gene, TE	UGGCUGUGAGUAUUCCUUUUGUA	TRUE	GCCAAAAACGACCAGAGGAAUCUGACGGCGCAACAAUUGUCCGUGGCUGUGAGUAUUCCUUUUGUACCAUAACUA	..........((.((((((((((.(((((.((.(........)))))))).)).)))))))).))..........	-19.8	[10, 34, 41, 64]	54	5 success	Coordinates	published		valid	3-pass_rep					Y	none	Y	N	2
PID0571	Lin2016-hq	Rhsol	Rhi-milR-52		KB317739.1:66004-66086:-	AFRT00000000.1_scaffolds	KB317739.1:66014-66077:-	GCA_000334115.1_Rhisol_AG1IA_1.0	gene, TE	GAGCAUAGACUGGUAGAGCGU	TRUE	CGUUGCUGGCCUCGCUGGAGCUGUCUCUCUGUAGACGAACUCAUCUACUCGAUGAGCAUAGACUGGUAGAGCGUUAUAGAAUA	......((((((((((((..(((((((((.(((((.(....).)))))..)).))).)))).))))).))).)))).......	-19.5	[9, 30, 47, 72]	63	5 success	Coordinates	published		valid	2-pass					Y	PCG-CDS-exon	N	Not tested: not intergenic	4
PID0572	Lin2016-hq	Rhsol	Rhi-milR-166		KB317740.1:94956-95053:+	AFRT00000000.1_scaffolds	KB317740.1:94966-95043:+	GCA_000334115.1_Rhisol_AG1IA_1.0	gene, TE	UUGGCAUCAGAAGUUGUAGAAAC	TRUE	UGUCAAGUGCAUGAUGCAGCUUGUUAUGUUGGAUUUAACAGGUUGGUCACAGAUGUGACCAGCCAGUUGGCAUCAGAAGUUGUAGAAACAGAUUGUUG	...(((........((((((((.(.((((......((((.((((((((((....)))))))))).)))))))).).))))))))........)))...	-31.9	[10, 39, 64, 87]	77	5 success	Coordinates	published		valid	3-pass_rep					Y	none	Y	N	2
PID0573	Lin2016-hq	Rhsol	Rhi-milR-113		-	AFRT00000000.1_scaffolds	-	-	-	UAUGGUUAUGGGUAGAGGGCAACAA	-	-	-	-	-	-	5 success	Coordinates	published		secondary structure in duplex, >20 mismatches in duplex	-	-	-	-	-	-	not evaluated: hairpin invalid	-	-	-
PID0574	Lin2016-hq	Rhsol	Rhi-milR-115		KB317740.1:205373-205483:+	AFRT00000000.1_scaffolds	KB317740.1:205408-205463:+	GCA_000334115.1_Rhisol_AG1IA_1.0	gene, TE	UAUUUGAUAAAGGACUGGGGGGG	TRUE	AAAUAAUAUAUUAUUACAGAAGAGAUUAUGUCAUCCCCCCCACCUCAGAUCUGUAAUAGUUUAGUAGAGUAUUUGAUAAAGGACUGGGGGGGGGAGGUAUGUGACCUGGAC	................(((.......(((.((.(((((((((((((((((((.((.........)).)).))))))....))..))))))))))).)))......)))...	-29.8	[35, 51, 67, 90]	55	5 success	Coordinates	published		valid	3-pass_rep					Y	TE	N	Not tested: not intergenic	4
PID0575	Lin2016-hq	Rhsol	Rhi-milR-22		KB317742.1:6395-6475:+	AFRT00000000.1_scaffolds	KB317742.1:6403-6465:+	GCA_000334115.1_Rhisol_AG1IA_1.0	gene, TE	AGCGAGUUGCAGUUCCUGGAUGC	FALSE	AAGAAAGCCUAGCGAGUUGCAGUUCCUGGAUGCUUAUUAAUAAGCUUCCAGGUACAAGCUGUAUCUCCUAUAUUCAUAUAG	.........(((.(((.(((((((((((((.(((((....))))).))))))....))))))).))))))...........	-28.2	[8, 32, 43, 70]	62	5 success	Coordinates	published		valid	1-fail					Y	PCG-CDS-exon	N	Not tested: not intergenic	4
PID0576	Lin2016-hq	Rhsol	Rhi-milR-93		KB317742.1:8216-8282:+	AFRT00000000.1_scaffolds	KB317742.1:8226-8272:+	GCA_000334115.1_Rhisol_AG1IA_1.0	gene, TE	GUUCCAAGUUAAUUCCCAACG	TRUE	AAAGUUUAAAGUUGAUGAAUUAACUUUGGAACACUAAGUUCCAAGUUAAUUCCCAACGUUUCCUAAU	..........((((..((((((((((.(((((.....))))))))))))))).))))..........	-19.9	[10, 33, 35, 56]	46	5 success	Coordinates	published		valid	3-pass_rep					Y	none	Y	N	2
PID0577	Lin2016-hq	Rhsol	Rhi-milR-148		KB317742.1:28130-28206:+	AFRT00000000.1_scaffolds	KB317742.1:28137-28196:+	GCA_000334115.1_Rhisol_AG1IA_1.0	gene, TE	UGGGCUGUAAGUCCUCAAGGGG	TRUE	CGUAGGUCCCUUGAGACAAGUUCCGUGGAAGUAUACACAAUUCCCCUGGGCUGUAAGUCCUCAAGGGGGGAUAUACA	.(((..(((((((((((.(((((.(.((((..........)))).).)))))....)).))))))))).....))).	-22.5	[7, 25, 44, 66]	59	5 success	Coordinates	published		valid	3-pass_rep					Y	none	Y	N	2
PID0578	Lin2016-hq	Rhsol	Rhi-milR-2		KB317742.1:52867-52960:+	AFRT00000000.1_scaffolds	KB317742.1:52875-52951:+	GCA_000334115.1_Rhisol_AG1IA_1.0	gene, TE	AAAGCUGUUAACCCGCGGAGAGG	TRUE	UGAGGGUGAAAAAGCUGUUAACCCGCGGAGAGGCCACUCCGGACCAGCUUCGUAGAGGCCCUUCAUGGGUUUAACUGCGCUUUUUUGUUCCUCC	.(((((.((((((((.(((((((((.((((.((((.((.((((.....)))).)).)))))))).)))).)))))...))))))))..))))).	-40.5	[8, 31, 59, 84]	76	5 success	Coordinates	published		valid	3-pass_rep					Y	PCG-CDS-exon	N	Not tested: not intergenic	4
PID0579	Lin2016-hq	Rhsol	Rhi-milR-146		KB317742.1:96320-96429:+	AFRT00000000.1_scaffolds	KB317742.1:96338-96412:+	GCA_000334115.1_Rhisol_AG1IA_1.0	gene, TE	UGGGCAUGUGAUCAAUAUAGCGGC	TRUE	UGUGCCGUUCACUAUAAUAAUGGGCAUGUGAUCAAUAUAGCGGCUAGAUCAGUUCCAGCUGUGCAAGCCCUAUUGAAAGACAUCAUGCCUUCAAUGAUGAAACAUAAAAU	((((...((((.(((......(((((((((.((...((((.((((.(..((((....))))..).)))))))).....)))).)))))))...))).)))).))))....	-28	[18, 44, 65, 92]	74	5 success	Coordinates	published		valid	3-pass_rep					Y	none	Y	N	2
PID0580	Lin2016-hq	Rhsol	Rhi-milR-164		KB317742.1:102330-102417:+	AFRT00000000.1_scaffolds	KB317742.1:102344-102407:+	GCA_000334115.1_Rhisol_AG1IA_1.0	gene, TE	UUGGAUAUGUGGUACAAGCGAGG	TRUE	UUGUGACGCUGAGUCUUGUUUUAAUGUCUCGGUAUCCAAAAGGAUUAAAUCAACUGUUGGAUAUGUGGUACAAGCGAGGUUUGUCAUA	.((((((...((((((((((....(((((..((((((((.((...........)).))))))))..)).)))))))))))))))))))	-22.6	[14, 40, 54, 77]	63	5 success	Coordinates	published		valid	3-pass_rep					Y	none	Y	N	2
PID0581	Lin2016-hq	Rhsol	Rhi-milR-21		KB317742.1:112670-112782:-	AFRT00000000.1_scaffolds	KB317742.1:112690-112771:-	GCA_000334115.1_Rhisol_AG1IA_1.0	gene, TE	UAGCGAGGUAGAACAAGUAAGUCCA	TRUE	UAAAAAGAAUUUCUCUUGCAUUUGCCUUGGAAAAGAGGUCUUUUGUAUUUAAUGGACUUCAUAACCCGAUAGCGAGGUAGAACAAGUAAGUCCAUAGUUUUUUUUAACACCUG	(((((((((((...(((((.(((((((((.....(((((((.(((....))).)))))))............)))))))))....))))).....))))))))))).......	-24.9	[11, 32, 68, 92]	81	5 success	Coordinates	published		valid	3-pass_rep					Y	none	Y	N	2
PID0582	Lin2016-hq	Rhsol	Rhi-milR-130		KB317700.1:262702-262767:+	AFRT00000000.1_scaffolds	KB317700.1:262710-262756:+	GCA_000334115.1_Rhisol_AG1IA_1.0	gene, TE	UGAGUGCCAGUGCAAGCAGC	FALSE	GAUGACACAUUGAGUGCCAGUGCAAGCAGCGCAUCUGCUAGCCCUGUCACUCCCAAGGUCCGAUCG	((((((.....(((((.(((.((.(((((.....))))).)).))).))))).....)))..))).	-23.4	[8, 29, 33, 54]	46	5 success	Coordinates	published		valid	3-pass_rep					Y	none	Y	N	2
PID0583	Lin2016-hq	Rhsol	Rhi-milR-103		KB317748.1:84977-85047:-	AFRT00000000.1_scaffolds	KB319708.1:307-361:-	GCA_000334115.1_Rhisol_AG1IA_1.0	gene, TE	UUAGAACCAGAUUGAUGAUGCG	TRUE	CAUUUUCAAUUAGAACCAGAUUGAUGAUGCGCCUUCUGGCAGCUGGCUCAAUUUGGUUGUAUGCAAUCUGC	..........((.(((((((((((....(((((....))).))....))))))))))).))..........	-22	[8, 32, 37, 62]	54	5 success	Coordinates	published		valid	2-pass					Y	none	Y	N	3
PID0584	Lin2016-hq	Rhsol	Rhi-milR-37		KB317749.1:28148-28233:+	AFRT00000000.1_scaffolds	KB317749.1:28160-28223:+	GCA_000334115.1_Rhisol_AG1IA_1.0	gene, TE	AUGGGAUGGCUUACUGGGGA	FALSE	GGGAUGUACUUGGCCACCAACUAGGGCUAUCUCCAACCAAACCAACGAAAUAAAAUAUGGGAUGGCUUACUGGGGAAGUUUGCACC	.((.((((..(..((.(((....((((((((.(((......................)))))))))))..)))))..)..))))))	-19.1	[12, 37, 54, 75]	63	5 success	Coordinates	published		valid	2-pass					Y	PCG-CDS-exon	N	Not tested: not intergenic	4
PID0585	Lin2016-hq	Rhsol	Rhi-milR-56		KB317749.1:39175-39245:+	AFRT00000000.1_scaffolds	KB317749.1:39183-39236:+	GCA_000334115.1_Rhisol_AG1IA_1.0	gene, TE	CGGCUUCAAGAACGGUACCGACGG	TRUE	CGUUCCCGGUCGGCUUCAAGAACGGUACCGACGGCUCCGUCGGCGUCGCUGUUGAUGCCAUGCGCGCAGCU	.(((.(((...(((.((((.(.(((..((((((....))))))..))).).)))).)))...)).).))).	-25.3	[8, 32, 37, 61]	53	5 success	Coordinates	published		valid	3-pass_rep					Y	PCG-CDS-exon	N	Not tested: not intergenic	4
PID0586	Lin2016-hq	Rhsol	Rhi-milR-149		KB317749.1:155893-155976:+	AFRT00000000.1_scaffolds	KB317749.1:155894-155966:+	GCA_000334115.1_Rhisol_AG1IA_1.0	gene, TE	UGGUCGGCACAUGUUGUAGGAGC	TRUE	GGACCUACUGCACCAGCUAUACAAGGGCGUGUUCAAAGACCACCUCUCAAAAUGGUCGGCACAUGUUGUAGGAGCAAAAGAGUU	(..(((((.(((((.(((((...((((.(((.((...)).)))))))....))))).))....))).)))))..).........	-20.1	[1, 20, 50, 73]	72	5 success	Coordinates	published		valid	3-pass_rep					Y	none	Y	N	2
PID0587	Lin2016-hq	Rhsol	Rhi-milR-128		KB317701.1:1-53:+	AFRT00000000.1_scaffolds	KB317701.1:2-52:+	GCA_000334115.1_Rhisol_AG1IA_1.0	gene, TE	UGAGGAGAAGUGUGGAUCAAUGC	TRUE	CGCUGAGGAGAAGUGUGGAUCAAUGCCCAGGCGUUUGUACAGUGCCCUCAGGA	..((((((.(.(.((((.(..(((((....)))))).)))).).)))))))..	-18.3	[1, 24, 31, 51]	50	5 success	Coordinates	published		valid	3-pass_rep					Y	TE	N	Not tested: not intergenic	4
PID0588	Lin2016-hq	Rhsol	Rhi-milR-19		KB317701.1:200456-200527:+	AFRT00000000.1_scaffolds	KB317701.1:200464-200517:+	GCA_000334115.1_Rhisol_AG1IA_1.0	gene, TE	AGGAGCUGGAUCUCAAGAUGCGUC	TRUE	AUCUCAGCUCAGUCAGAUCAAGCACUCGUAUGGCCUUGCAGAGGAGCUGGAUCUCAAGAUGCGUCAAGAGAA	.((((.((.((...(((((.(((.((((((......))).)))..))).))))).....)).))...)))).	-18.8	[8, 28, 37, 61]	53	5 success	Coordinates	published		valid	3-pass_rep					Y	TE	N	Not tested: not intergenic	4
PID0589	Lin2016-hq	Rhsol	Rhi-milR-81		-	AFRT00000000.1_scaffolds	-	-	-	GGGACCUAUCGAAUUGUUGACGU	-	-	-	-	-	-	5 success	Coordinates	published		secondary structure in duplex	-	-	-	-	-	-	not evaluated: hairpin invalid	-	-	-
PID0590	Lin2016-hq	Rhsol	Rhi-milR-153		KB317701.1:339759-339837:+	AFRT00000000.1_scaffolds	KB317701.1:339767-339826:+	GCA_000334115.1_Rhisol_AG1IA_1.0	gene, TE	UGUGUUGUUUUGAUUUCCUUGCAG	TRUE	CUCACCUUGGUGUGUUGUUUUGAUUUCCUUGCAGUGCCGGUCAUGCAAUGAUCUUCGAGAAGGCUACUGCUCCGUGAGC	(((((..(((((.(((.((((((..((.(((((..........))))).))...)))))).))))))))....))))).	-17.7	[8, 32, 43, 67]	59	5 success	Coordinates	published		valid	3-pass_rep					Y	PCG-CDS-exon	N	Not tested: not intergenic	4
PID0591	Lin2016-hq	Rhsol	Rhi-milR-51		KB317701.1:443221-443305:-	AFRT00000000.1_scaffolds	KB317701.1:443246-443297:-	GCA_000334115.1_Rhisol_AG1IA_1.0	gene, TE	CCCGAGAUCGUGAGCUCUGAAGAC	TRUE	UUCUGCCCUCCCGAGAUCGUGAGCUCUGAAGACCCCCUCUUCAUCCUCUACACUUCGGGUUCGACUGGUCGCCCCAAGGGUGUCG	.........((((((.....(((...((((((.....))))))..))).....))))))........(.(((((...))))).).	-23	[8, 32, 36, 59]	51	5 success	Coordinates	published		valid	2-pass					Y	PCG-CDS-exon	N	Not tested: not intergenic	4
PID0592	Lin2016-hq	Rhsol	Rhi-milR-68		KB317701.1:980275-980364:-	AFRT00000000.1_scaffolds	KB317701.1:980285-980356:-	GCA_000334115.1_Rhisol_AG1IA_1.0	gene, TE	UGAGGAUCUGUAUUUGUGGAGG	TRUE	GAUAGUUUUCUCAUCGCCUGUACCACGUUUCAUUGUAGGGAUUGGGAGAUUGGCAGUGAGGAUCUGUAUUUGUGGAGGGGAAAAGCUUGG	.....(((((((.((((..((((....(((((((((...((((....)))).)))))))))....))))..)))).))))))).......	-21.4	[8, 32, 55, 79]	71	5 success	Coordinates	published		valid	3-pass_rep					Y	none	Y	N	2
PID0593	Lin2016-hq	Rhsol	Rhi-milR-1		KB317755.1:3225-3315:+	AFRT00000000.1_scaffolds	KB317755.1:3236-3305:+	GCA_000334115.1_Rhisol_AG1IA_1.0	gene, TE	AAAGAGGAGUGUUCUGAUGGAG	FALSE	AUUUGGCAAACCUUCCUUACGAUGUUCCUUGAUUGCCUCCAAGGUAGGAAUUUUCUCACAAAGAGGAGUGUUCUGAUGGAGGUCUCCACGC	...(((.(.((((((.(((.((((((((((..((((((...))))))...............)))))))))).))).)))))).))))...	-20.8	[11, 34, 57, 80]	69	5 success	Coordinates	published		valid	1-fail					Y	none	Y	N	4
PID0594	Lin2016-hq	Rhsol	Rhi-milR-97		KB317756.1:103745-103858:-	AFRT00000000.1_scaffolds	KB317756.1:103768-103857:-	GCA_000334115.1_Rhisol_AG1IA_1.0	gene, TE	UAAGGCAGUGACUGAAUAACUAGG	TRUE	ACUUAAGGCAGCAGUGAGCUAUCUACAUACAGCAAUGAAGCUGCUUAAGGCAGUGACUGAAUAACUAGGUAAAUAUCUUACUGGGCUUAAGGCCCUUGUAUAAUGUGGGGUUGC	.((((((.(..(((((((.(((.(((.............((((((...))))))..............))).))).)))))))).))))))(((((..........)))))...	-31	[1, 26, 67, 90]	89	5 success	Coordinates	published		valid	2-pass					Y	none	Y	N	3
PID0595	Lin2016-hq	Rhsol	Rhi-milR-125		-	AFRT00000000.1_scaffolds	-	-	-	UGACUGUUGAAAAGGAGGAUUG	-	-	-	-	-	-	5 success	Coordinates	published		secondary structure in duplex	-	-	-	-	-	-	not evaluated: hairpin invalid	-	-	-
PID0596	Lin2016-hq	Rhsol	Rhi-milR-54		-	AFRT00000000.1_scaffolds	-	-	-	CGCUGCAUGUGGAUUCGGAUCA	-	-	-	-	-	-	5 success	Coordinates	published		secondary structure in duplex	-	-	-	-	-	-	not evaluated: hairpin invalid	-	-	-
PID0597	Lin2016-hq	Rhsol	Rhi-milR-137		KB317759.1:4964-5055:+	AFRT00000000.1_scaffolds	KB317759.1:4972-5047:+	GCA_000334115.1_Rhisol_AG1IA_1.0	gene, TE	UGGAGCUGGAGGACUAAUUUUGC	TRUE	UUUGAGGUGCUGGAGCUGGAGGACUAAUUUUGCUGUAUAUUGACAUGCAUGUGCUGUAAUCUGUGGUGCCUACAGGCCUCCUGCAACCCAAU	.(((.(((((.(((((((.(((((((...((((.((((((........)))))).))))....)))).))).)))..)))).)).)))))).	-29.8	[8, 31, 56, 83]	75	5 success	Coordinates	published		valid	3-pass_rep					Y	none	Y	N	2
PID0598	Lin2016-hq	Rhsol	Rhi-milR-45		KB317763.1:52749-52821:-	AFRT00000000.1_scaffolds	KB317763.1:52759-52813:-	GCA_000334115.1_Rhisol_AG1IA_1.0	gene, TE	CAGGGAAUUUGGCAAAGAAGUC	FALSE	UGAGUUUCCUCAGGGAAUUUGGCAAAGAAGUCUUCAUUAAAAUCCUUCACUGUCUUAUUCCUGGUUGCCUCAU	((((...((...((((((..((((..((((..............))))..))))..))))))))....)))).	-17.5	[8, 31, 42, 62]	54	5 success	Coordinates	published		valid	1-fail					Y	none	Y	N	4
PID0599	Lin2016-hq	Rhsol	Rhi-milR-89		KB317763.1:71300-71371:+	AFRT00000000.1_scaffolds	KB317763.1:71308-71362:+	GCA_000334115.1_Rhisol_AG1IA_1.0	gene, TE	GUCGGGGUGCGUAUCGAGGGAAG	TRUE	GUUUUAUGAUGUCGGGGUGCGUAUCGAGGGAAGAUACACCGUCCGGGUCGCGCCCCCUGAGCUCGAUGAAUC	..(((((((..((((((((((..((((.((........)).).)))..))))))))..))..)).)))))..	-25.9	[8, 30, 37, 62]	54	5 success	Coordinates	published		valid	2-pass					Y	PCG-CDS-exon	N	Not tested: not intergenic	4
PID0600	Lin2016-hq	Rhsol	Rhi-milR-110		KB317702.1:91860-91939:+	AFRT00000000.1_scaffolds	KB317702.1:91868-91932:+	GCA_000334115.1_Rhisol_AG1IA_1.0	gene, TE	UAGUAGUUGUUCUGUAUGGAGGC	TRUE	GAUAAUUUUGUAGUAGUUGUUCUGUAUGGAGGCAGUUCUAGCUGGUCCCCAUACAUCUGAAUAGACUAUUUUGCCUAUCU	((((.......((((((((((((((((((.((((((....))))..)))))))))...))))).)))))).....)))).	-21.4	[8, 31, 46, 72]	64	5 success	Coordinates	published		valid	2-pass					Y	none	Y	N	3
PID0601	Lin2016-hq	Rhsol	Rhi-milR-16		KB317702.1:243369-243464:-	AFRT00000000.1_scaffolds	KB317702.1:243379-243454:-	GCA_000334115.1_Rhisol_AG1IA_1.0	gene, TE	AGACCGUCCACUCUGAACUAGCG	FALSE	ACACGAGACUGGCUGAGAUAGAGCAGGGCGAAUACCACCAGUAAAAUAAAUAUUGCGGUCCGUAGACCGUCCACUCUGAACUAGCGUGUCAUCCUU	....(((((..((((...(((((..(((((..(((.(((.((((........)))))))..)))...))))).)))))...))))..))).))...	-25.9	[10, 34, 61, 85]	75	5 success	Coordinates	published		valid	1-fail	RF00026	1.6e-23	U6 spliceosomal RNA	snRNA	Y	none	Y	N	4
PID0602	Lin2016-hq	Rhsol	Rhi-milR-175		KB317702.1:381257-381367:-	AFRT00000000.1_scaffolds	KB317702.1:381278-381325:-	GCA_000334115.1_Rhisol_AG1IA_1.0	gene, TE	UUUAAUCGAGGACGGACCAUAG	FALSE	GCGAAGAGGAGGGAAGAGGAAGAGCAGGCUGCACAGGUAUGUUUCUGCUCUCGAUUAAAUUGGAGUGAUUUAAUCGAGGACGGACCAUAGGCAUAUGCGGACUUUAUCGAU	.....................((..((((((((....((((((((((.(((((((((((((.....))))))))))))).)))).....))))))))))).)))..))...	-28.5	[42, 60, 66, 89]	47	5 success	Coordinates	published		valid	3-pass_rep					Y	none	Y	N	2
PID0603	Lin2016-hq	Rhsol	Rhi-milR-101		KB317702.1:821566-821659:+	AFRT00000000.1_scaffolds	KB317702.1:821574-821651:+	GCA_000334115.1_Rhisol_AG1IA_1.0	gene, TE	UACCCGAGGAAGGUGUGGAUC	TRUE	UUAAAGAUGUUACCCGAGGAAGGUGUGGAUCUUCGAUUUGACUCCCUCGGGGGUCAGGAGCAAUCCAAUAUCUCUCCUUUGGUAGAGUGGACGU	.........(((((.(((((((((((((((((((....(((((((....)))))))))))..)))).)))))).))))).))))).........	-33.8	[8, 29, 62, 85]	77	5 success	Coordinates	published		valid	3-pass_rep					Y	PCG-CDS-exon	N	Not tested: not intergenic	4
PID0604	Lin2016-hq	Rhsol	Rhi-milR-7		KB318401.1:54-126:-	AFRT00000000.1_scaffolds	KB318401.1:64-116:-	GCA_000334115.1_Rhisol_AG1IA_1.0	gene, TE	CAAUCCUGUAUGAGACUCUGUGC	TRUE	UUUGUUGGGAGCAAGACACACAUCCAGGACAUGUUUGAUGCAAUCCUGUAUGAGACUCUGUGCUCUAUGCCAG	.......(((((((((..(.(((.(((((..(((.....))).))))).))).)..))).)))))).......	-19.5	[10, 33, 39, 62]	52	5 success	Coordinates	published		valid	3-pass_rep					Y	none	Y	N	2
PID0605	Lin2016-hq	Rhsol	Rhi-milR-131		KB318401.1:627-713:-	AFRT00000000.1_scaffolds	KB318401.1:637-705:-	GCA_000334115.1_Rhisol_AG1IA_1.0	gene, TE	UUGAUGGAGUGGAAUAUGACCC	TRUE	GAUUUCAGGAGAUAUACCUACUCCAGGAGGCAGCAAUUUGGAUCAGUCAAUGGACAUUGAUGGAGUGGAAUAUGACCCUGGAACUUA	..(((((((..((((.((.((((((.((..(((....)))..)).(((....))).....)))))))).))))...)))))))....	-20.9	[8, 29, 55, 76]	68	5 success	Coordinates	published		valid	2-pass					Y	none	Y	N	3
PID0606	Lin2016-hq	Rhsol	Rhi-milR-177		KB317767.1:1176-1289:+	AFRT00000000.1_scaffolds	KB317767.1:1194-1238:+	GCA_000334115.1_Rhisol_AG1IA_1.0	gene, TE	UUUGGGCGCAAUGGGAGAGACU	FALSE	UAUUGCACAACAACACCGGGUUUGGGCGCAAUGGGAGAGACUAGUCUGACUUCCCCCCAAAUCCAAUCAGGAUGGGCUGCCCCAUCCUCCCGCACUCAUACUCCUGCCCCUGCG	....(((..........(((((((((......((((((((....)))...))))))))))))))....((((((((....))))))))...(((..........)))...))).	-32.8	[18, 41, 42, 62]	44	5 success	Coordinates	published		valid	1-fail					Y	none	Y	N	4
PID0607	Lin2016-hq	Rhsol	Rhi-milR-174		KB317768.1:8775-8887:+	AFRT00000000.1_scaffolds	KB317768.1:8800-8868:+	GCA_000334115.1_Rhisol_AG1IA_1.0	gene, TE	UUUAAGGAUUAUGAAAUGGAGGC	TRUE	CAAGUCCCUGGAGGAAAUCCUCCAAUUCCUGCAUAACAAGUCCAAAGCGCCCCUGUCCAUCAAACGCGCAUUUAAGGAUUAUGAAAUGGAGGCUUGCCUACUCUUCUACCAAG	........((((((....))))))...(((.(((..((((((((((((((...((.....))...)))).)))..))))).))..))).))).....................	-26.2	[25, 46, 68, 93]	68	5 success	Coordinates	published		valid	3-pass_rep					Y	TE	N	Not tested: not intergenic	4
PID0608	Lin2016-hq	Rhsol	Rhi-milR-98		KB317769.1:50922-51033:+	AFRT00000000.1_scaffolds	KB317769.1:50922-51023:+	GCA_000334115.1_Rhisol_AG1IA_1.0	gene, TE	UAAGGGCAAUGGCAAGCUAUGUA	FALSE	UGUAAGGGCAAUGGCAAGCUAUGUAAGUACAACAAGGAAGCUGCUUAAUGCAGUGUGGACUGGUGGGACUUUAGUAGUUACUGGGCUUAAGGCCCUUGUACAGUGUGGGAUG	(((((((((...(((.((((((..((((...((.((...(((((.....))))).....)).))...))))..)))))).....)))....)))))..))))..........	-30.9	[0, 24, 70, 101]	101	5 success	Coordinates	published		valid	1-fail					Y	TE	N	Not tested: not intergenic	4
PID0609	Lin2016-hq	Rhsol	Rhi-milR-57		-	AFRT00000000.1_scaffolds	-	-	-	CGGGCGAGUAGUGAAAAGGUCAC	-	-	-	-	-	-	5 success	Coordinates	published		secondary structure in duplex, >20 mismatches in duplex	-	-	-	-	-	-	not evaluated: hairpin invalid	-	-	-
PID0610	Lin2016-hq	Rhsol	Rhi-milR-83		-	AFRT00000000.1_scaffolds	-	-	-	GGGCCAAGGACGCGAACAGGAA	-	-	-	-	-	-	5 success	Coordinates	published		secondary structure in duplex	-	-	-	-	-	-	not evaluated: hairpin invalid	-	-	-
PID0611	Lin2016-hq	Rhsol	Rhi-milR-5		KB317703.1:887-999:+	AFRT00000000.1_scaffolds	KB317703.1:893-979:+	GCA_000334115.1_Rhisol_AG1IA_1.0	gene, TE	AAGGAAUGGGUUGAAUGCUGCC	FALSE	ACCCAGGCCAGCAAAGGACCCUAGAACUCCUCAGCCGCAACUAUUGGUGGCCAGGUAUGAAGUUGUCAGCUAAGGAAUGGGUUGAAUGCUGCCCAGUAUGCCAAGCUAACCGU	.....((.(((((...(((((......((((.(((.((((((..(.(((......))).)))))))..))).))))..)))))...))))).))...................	-30.1	[6, 33, 69, 92]	86	5 success	Coordinates	published		valid	1-fail					Y	TE	N	Not tested: not intergenic	4
PID0612	Lin2016-hq	Rhsol	Rhi-milR-39		-	AFRT00000000.1_scaffolds	-	-	-	CAAAAAAAUGGAUAGAAGUGGGA	-	-	-	-	-	-	5 success	Coordinates	published		secondary structure in duplex, >20 mismatches in duplex	-	-	-	-	-	-	not evaluated: hairpin invalid	-	-	-
PID0613	Lin2016-hq	Rhsol	Rhi-milR-140		KB317703.1:120042-120155:+	AFRT00000000.1_scaffolds	KB317703.1:120048-120153:+	GCA_000334115.1_Rhisol_AG1IA_1.0	gene, TE	UGGCAUGUAGCAUACUGGGUAUG	TRUE	AGCUGUGUUGGCAUGUAGCAUACUGGGUAUGCUGCAUGCAGAAGAGUAGGACCUUGUGACAAGAAGGACAGAGCUGUUCUGCCAAGUGGCAUACUGGGUGUGCUGUGACCACAA	.....(((.(((((..((((((((.((((((((((..((((((.(((..(.((((.(....).)))).)...))).))))))...)))))))))).))))))))))).))))).	-49.9	[6, 27, 92, 111]	105	5 success	Coordinates	published		valid	3-pass_rep					Y	none	Y	N	2
PID0614	Lin2016-hq	Rhsol	Rhi-milR-147		KB317703.1:122191-122288:+	AFRT00000000.1_scaffolds	KB317703.1:122202-122278:+	GCA_000334115.1_Rhisol_AG1IA_1.0	gene, TE	UGGGCAUUUGUAGGUUGGUCUGC	TRUE	CUUAUGUAACCUGCAGAAAGGCCACAUGAUGUUGCCAAGUCCCAUAAUCAGUGGCACUGCAGGGUGGGCAUUUGUAGGUUGGUCUGCAGAUACAUGUA	..((((((..(((((((..(((((((.((((((.((.(((.((((.....)))).)))...))...))))))))).))))..))))))).))))))..	-33.3	[11, 34, 62, 87]	76	5 success	Coordinates	published		valid	2-pass					Y	none	Y	N	3
PID0615	Lin2016-hq	Rhsol	Rhi-milR-25		KB317703.1:481308-481382:+	AFRT00000000.1_scaffolds	KB317703.1:481316-481375:+	GCA_000334115.1_Rhisol_AG1IA_1.0	gene, TE	AGGACCUACGGCUACUUCUGGAGC	TRUE	GUGGUGCAGAAGGACCUACGGCUACUUCUGGAGCAAUCGACGACCCAUCCAGAAUGGCCUCGCUCCUCGACCACA	(((((.(.((.(((.....(((((.(((((((...............))))))))))))....))))))))))).	-26	[8, 32, 46, 67]	59	5 success	Coordinates	published		valid	3-pass_rep					Y	PCG-CDS-exon	N	Not tested: not intergenic	4
PID0616	Lin2016-hq	Rhsol	Rhi-milR-44		KB317703.1:915178-915273:+	AFRT00000000.1_scaffolds	KB317703.1:915186-915261:+	GCA_000334115.1_Rhisol_AG1IA_1.0	gene, TE	CAGGACAGGUAGUAUUGGGAGGCA	TRUE	CCCUCAGUUCCAGGACAGGUAGUAUUGGGAGGCAGUUAUUGGAACAAAACAAAGAGUUCAAUAUCAAGGUAUGCUUUUCCUGGGAGAUUUGGGGGU	(((((((((((((((.(((((.((((..((......(((((.(((..........))))))))))..))))))))).))))))))...))))))).	-29.5	[8, 32, 60, 83]	75	5 success	Coordinates	published		valid	3-pass_rep					Y	TE	N	Not tested: not intergenic	4
PID0617	Lin2016-hq	Rhsol	Rhi-milR-119		KB317777.1:7095-7207:-	AFRT00000000.1_scaffolds	KB317777.1:7113-7190:-	GCA_000334115.1_Rhisol_AG1IA_1.0	gene, TE	UCAUUCAAGGGAGCGGAACAAAAC	TRUE	CUUGGGAUUUCUCUCCAAGUCAUUCAAGGGAGCGGAACAAAACUACAACACACACAACAAGGAACUCCUUGCUAUCAUCCGUUCCUUUGAGUACUGGCAAACAUUUCUGGAAG	.((.(((.......(((.((.(((((((((((((((.....................(((((....)))))......))))))))))))))))))))........))).))..	-30.8	[17, 39, 73, 94]	77	5 success	Coordinates	published		valid	3-pass_rep					Y	TE	N	Not tested: not intergenic	4
PID0618	Lin2016-hq	Rhsol	Rhi-milR-32		-	AFRT00000000.1_scaffolds	-	-	-	AGGGCUUGGACCAAGGUAAGGG	-	-	-	-	-	-	5 success	Coordinates	published		secondary structure in duplex	-	-	-	-	-	-	not evaluated: hairpin invalid	-	-	-
PID0619	Lin2016-hq	Rhsol	Rhi-milR-41		KB317782.1:26092-26166:+	AFRT00000000.1_scaffolds	KB317782.1:26101-26156:+	GCA_000334115.1_Rhisol_AG1IA_1.0	gene, TE	CCGAGAAGGCUGCUCUGUACU	TRUE	CCCACCGAUGAGUGCACCGUCGCUUUCUUGGCCAUGCACCUCACCGAGAAGGCUGCUCUGUACUACGAAGGAGGC	.((.((..((((((((..((.((((((((((............)))))))))).))..)))))).))..)).)).	-25.9	[9, 34, 39, 64]	55	5 success	Coordinates	published		valid	2-pass					Y	none	Y	N	3
PID0620	Lin2016-hq	Rhsol	Rhi-milR-133		KB317783.1:37469-37544:+	AFRT00000000.1_scaffolds	KB317783.1:37477-37534:+	GCA_000334115.1_Rhisol_AG1IA_1.0	gene, TE	UGAUGUAUUGAAUGCUCUGGGACAC	TRUE	CUUGUAUGAGUGAUGUAUUGAAUGCUCUGGGACACAAAUCAUCUUAGUGGUGUUCAAUGUACAGGGCCCUACCAAC	(((((((.........((((((((((((((((.........)))))).)))))))))))))))))...........	-17.8	[8, 33, 39, 65]	57	5 success	Coordinates	published		valid	3-pass_rep					Y	none	Y	N	2
PID0621	Lin2016-hq	Rhsol	Rhi-milR-75		KB317704.1:28667-28737:-	AFRT00000000.1_scaffolds	KB317704.1:28672-28729:-	GCA_000334115.1_Rhisol_AG1IA_1.0	gene, TE	GCGGACGGAGCUUAUGAUGGGAGCA	TRUE	AUCGCUAUUUGCGGACGGAGCUUAUGAUGGGAGCAAGGUUUCCGCGUCGGAGGAGCGAGUUGGCUGGCAUG	...((((...((.(((...((((.(((((((((......)))).)))))...))))..))).))))))...	-22.5	[8, 32, 39, 65]	57	5 success	Coordinates	published		valid	3-pass_rep					Y	PCG-CDS-exon	N	Not tested: not intergenic	4
PID0622	Lin2016-hq	Rhsol	Rhi-milR-91		KB317704.1:182537-182650:-	AFRT00000000.1_scaffolds	KB317704.1:182540-182633:-	GCA_000334115.1_Rhisol_AG1IA_1.0	gene, TE	GUCUGGAAGUUGGCGCAAGC	TRUE	UUGAACCGGGAAGUAAGACGUCUGGAAGUUGGCGCAAGCAUUAGUAUAUAUCUUGCCUAGUCUUACGAGACGCGGUUUGAGAUGUGGGUGCUUGUGCUGCCUUCCUUUUUUAGU	.......................(((((.(((((((((((((....(((((((((((..((((....))))..)))..))))))))))))))))))))).))))).........	-38.4	[17, 42, 85, 110]	93	5 success	Coordinates	published		valid	3-pass_rep					Y	none	Y	N	2
PID0623	Lin2016-hq	Rhsol	Rhi-milR-86		KB317704.1:814488-814578:+	AFRT00000000.1_scaffolds	KB317704.1:814498-814568:+	GCA_000334115.1_Rhisol_AG1IA_1.0	gene, TE	CGUAAACACUUGAACUUGGCGGAUA	TRUE	UCAUUCGCUGUCCGCGCAUUGCUCGCGUUGUUUACUGUGCGAGUGCAAUUGCUCUCUGCGUAAACACUUGAACUUGGCGGAUAUAUAUAUU	........(((((((.((..(.(((.((.((((((.(((.(((.((....)).)))))))))))))).))).).)))))))))........	-26.2	[10, 37, 57, 80]	70	5 success	Coordinates	published		valid	3-pass_rep					Y	PCG-CDS-exon	N	Not tested: not intergenic	4
PID0624	Lin2016-hq	Rhsol	Rhi-milR-50		KB317704.1:817288-817370:+	AFRT00000000.1_scaffolds	KB317704.1:817296-817370:+	GCA_000334115.1_Rhisol_AG1IA_1.0	gene, TE	CCAAGUCGCUACGUACCAAGGC	TRUE	UUACUUUCUACCAAGUCGCUACGUACCAAGGCAUGACGCUCAACAACCGGCGUCUCAAGAUUGGUUGGGGCAAGAACAGUGGC	..........(((..(((((.((.(((((.....((((((........))))))......))))))).)))..))....))).	-19.6	[8, 30, 58, 82]	74	5 success	Coordinates	published		valid	3-pass_rep					Y	PCG-CDS-exon	N	Not tested: not intergenic	4
PID0625	Lin2016-hq	Rhsol	Rhi-milR-17		KB317786.1:6990-7102:-	AFRT00000000.1_scaffolds	KB317786.1:6995-7085:-	GCA_000334115.1_Rhisol_AG1IA_1.0	gene, TE	AGACUAAGGCUCAGAUAAUUGCGC	TRUE	GCUCAAUACACUAGCCCCAAGACUAAGGCUCAGAUAAUUGCGCUGAAAAAGCUCAAAUACUCAGAUUGGGCUGUUGUUCAGCUUUUGCAACCUGAGACCCAGGUUUCUCAUGC	...................(((((..(((((((....((((((((((..(((((((.........)))))))....))))))....)))).))))).))..))))).......	-28.8	[17, 41, 81, 107]	90	5 success	Coordinates	published		valid	3-pass_rep					Y	none	Y	N	2
PID0626	Lin2016-hq	Rhsol	Rhi-milR-106		KB317786.1:28504-28613:+	AFRT00000000.1_scaffolds	KB317786.1:28506-28609:+	GCA_000334115.1_Rhisol_AG1IA_1.0	gene, TE	UAGGAUUGAAAUGGUUGGACGC	FALSE	AGGCAAACCUGACCUUCUCCUUUGAUGGCAAGCGCAUGACCAAGACCUUCCUUAUAUGCAAUACAGGGUCUCAUGCCACUAUCCUAGGAUUGAAAUGGUUGGACGCACAC	..((....(((((((((((((..(((((...(.((((((....((((((...(((.....))).))))))))))))).)))))..))))..)))..))))))..))....	-28.4	[2, 23, 82, 105]	103	5 success	Coordinates	published		valid	1-fail					Y	TE	N	Not tested: not intergenic	4
PID0627	Lin2016-hq	Rhsol	Rhi-milR-126		KB317786.1:44706-44800:+	AFRT00000000.1_scaffolds	KB317786.1:44717-44790:+	GCA_000334115.1_Rhisol_AG1IA_1.0	gene, TE	UGAGACAUUCUGUGCUAAGAUGG	TRUE	UGUUGAGUGCGCAUUUUUGUGCAGGAGGUUGAUGAACAAUCAUUUACAGCAUCAAAUGUUGCCUGAGACAUUCUGUGCUAAGAUGGCUCUUCUUG	....(((.((.((((((.((((((((.((((((((....)))))..((((((...)))))).....))).)))))))).)))))))).)))....	-23.8	[11, 34, 61, 84]	73	5 success	Coordinates	published		valid	3-pass_rep					Y	none	Y	N	2
PID0628	Lin2016-hq	Rhsol	Rhi-milR-26		-	AFRT00000000.1_scaffolds	-	-	-	AGGACCUUCUUGAACUCCAAGG	-	-	-	-	-	-	5 success	Coordinates	published		secondary structure in duplex	-	-	-	-	-	-	not evaluated: hairpin invalid	-	-	-
PID0629	Lin2016-hq	Rhsol	Rhi-milR-49		KB317790.1:1714-1824:+	AFRT00000000.1_scaffolds	KB317790.1:1732-1823:+	GCA_000334115.1_Rhisol_AG1IA_1.0	gene, TE	CAUUGAUUGGUUUGGCGUUGGACC	FALSE	CCUCAGUUACAUUGUAAACACAUUGAUUGGUUUGGCGUUGGACCAAUCAAUGUAAGUGAUCAUUGAGUUACAAGCACAUCAAUUGGUUUAGUGCUGAACCAAUCAAUGUCA	...................((((((((((((((((((((((((((((..((((..(((((......)))))....))))..))))))))))))))))))))))))))))..	-41.3	[18, 43, 84, 109]	91	5 success	Coordinates	published		valid	1-fail					Y	none	Y	N	4
PID0630	Lin2016-hq	Rhsol	Rhi-milR-13		KB317790.1:1869-1980:+	AFRT00000000.1_scaffolds	KB317790.1:1889-1946:+	GCA_000334115.1_Rhisol_AG1IA_1.0	gene, TE	ACUGAGACUUGCAUUGAUUG	FALSE	CAAUCAAUGUGUUUACAAUGUAACUGAGACUUGCAUUGAUUGGUUGGAUGCCAAACCAAUCGAUGCAGGUCUCAGUUGCAUUGUAAACACAUCAAUUGGUUUGGCAUCCAAC	((((..(((((((((((((((((((((((((((((((((((((((((...)).)))))))))))))))))))))))))))))))))))))))..))))..((((...)))).	-68.9	[20, 41, 56, 77]	57	5 success	Coordinates	published		valid	1-fail					Y	none	Y	N	4
PID0631	Lin2016-hq	Rhsol	Rhi-milR-99		KB317790.1:2646-2754:+	AFRT00000000.1_scaffolds	KB317790.1:2664-2740:+	GCA_000334115.1_Rhisol_AG1IA_1.0	gene, TE	UAAUAGGGACGUUGUAGACACAUC	FALSE	GCUGAACCAAUCAAUGUCCGUAAUAGGGACGUUGUAGACACAUCAAUUGGUUGAACACCAAACCAAUUGAUGCAAGUCUCAGUUACAUUGUUAACACAUUGAUUGGUUG	....(((((((((((((...((((((.....(((.((((.((((((((((((........))))))))))))...))))))).....))))))..))))))))))))).	-41.1	[18, 43, 68, 94]	76	5 success	Coordinates	published		valid	3-pass_rep					Y	none	Y	N	2
PID0632	Lin2016-hq	Rhsol	Rhi-milR-141		KB317790.1:9288-9395:-	AFRT00000000.1_scaffolds	KB317790.1:9307-9388:-	GCA_000334115.1_Rhisol_AG1IA_1.0	gene, TE	UGGCCAGUAGUAGUUCCUUGAGACC	FALSE	GCAGAUGCCUGGCCAGUAGUAGUUCCUUGAGACCAGUUCUAGCAUCCAUUGCCUCCCUGGAUGUCCGGCUAAGGGGCUAUCAUGGAAGAUUUGCAAUAGGUCUGUUUG	((((((..((..(((...((((((((((.((.((.(.....(((((((.........)))))))).))))))))))))))..))).))))))))..............	-30.1	[7, 33, 66, 88]	81	5 success	Coordinates	published		valid	1-fail					Y	TE	N	Not tested: not intergenic	4
PID0633	Lin2016-hq	Rhsol	Rhi-milR-40		KB317791.1:30574-30650:+	AFRT00000000.1_scaffolds	KB317791.1:30585-30640:+	GCA_000334115.1_Rhisol_AG1IA_1.0	gene, TE	CACAAUCCCUAUGUAGAAGUCAC	TRUE	UGCUUGAAAGCCCGCUUGACAUGGGGUGUAUUGGAAGAAUCUCCGCACAAUCCCUAUGUAGAAGUCACAAUCAAGUU	.((((((......((((.(((((((((((..((((......)))).)))..))))))))..)))).....)))))).	-22.9	[11, 32, 43, 66]	55	5 success	Coordinates	published		valid	2-pass					Y	none	Y	N	3
PID0634	Lin2016-hq	Rhsol	Rhi-milR-157		-	AFRT00000000.1_scaffolds	-	-	-	UUACUUGUGGGUGAUGGAAUGG	-	-	-	-	-	-	5 success	Coordinates	published		secondary structure in duplex	-	-	-	-	-	-	not evaluated: hairpin invalid	-	-	-
PID0635	Lin2016-hq	Rhsol	Rhi-milR-6		KB317791.1:37103-37212:-	AFRT00000000.1_scaffolds	KB317791.1:37124-37202:-	GCA_000334115.1_Rhisol_AG1IA_1.0	gene, TE	AAGUGGAGUUUUGCAAUGG	FALSE	AAACCUGGGCGUAUUGUUUAUUAUUCCAACAAUGAUUGCAAGUCUAUAUCUUGGGCGCUUUGAAUGCAAUAAGUGGAGUUUUGCAAUGGGUCCUAUGGAGGGCGUAAAAA	...(((((((.((((((.....((((((......((((((.(((((.....)))))........))))))...))))))...)))))).)))).....))).........	-27	[10, 35, 68, 88]	78	5 success	Coordinates	published		valid	1-fail					Y	none	Y	N	4
PID0636	Wang2016-nz	Fugra	Fg-HN-milR1		CM000574.1:3520752-3520824:+	AACM00000000.2_scaffolds	CM000574.1:3520754-3520814:+	GCA_000240135.3_ASM24013v3	gene, TE	AGGGACAAGCCUUGCGGCAGCU	FALSE	CCAGCUGGGCGGAAGGCUUCUCUCGUAGGCUCCCCUAGUCAAGGGACAAGCCUUGCGGCAGCUUUGUCUGCUG	..(((((..((.(((((((.((((...((((.....))))..)))).))))))).)).)))))..........	-28.2	[2, 27, 39, 62]	60	5 success	Coordinates	published		valid	2-pass					Y	PCG-intron	N	Not tested: not intergenic	3
PID0637	Wang2016-nz	Fugra	Fg-HN-milR2		CM000574.1:5515558-5515661:+	AACM00000000.2_scaffolds	CM000574.1:5515566-5515652:+	GCA_000240135.3_ASM24013v3	gene, TE	UAGGAAAGGCAGUUAACUAGGA	FALSE	CAACCGCGUGUAGGAAAGGCAGUUAACUAGGAAUAGCUACGACAACAUGUCCUACAUAUUGUCUCAGUUAUUCCUGGUUAGCUCACUUUCUUACACGCGGUUGG	((((((((((((((((((..((((((((((((((((((..(((((.((((...)))).)))))..))))))))))))))))))..)))))))))))))))))).	-66.2	[8, 31, 71, 94]	86	5 success	Coordinates	published		valid	3-pass_rep					Y	near-PCG	N	Not tested: not intergenic	2
PID0638	Wang2016-nz	Fugra	Fg-HN-milR3		CM000574.1:6007796-6007889:+	AACM00000000.2_scaffolds	CM000574.1:6007804-6007881:+	GCA_000240135.3_ASM24013v3	gene, TE	AAGAAAAUGGGAGCGAGCACA	FALSE	CAACACCCUUAAGAAAAUGGGAGCGAGCACAUCACUGCCUCUUGUGAAACACCACUGGAAAGCUUGGUUCGCUUCUUAUUUCUUUUGUCUUUCU	.......(..((((((..((((((((((.((...((...(((.(((......))).))).))..))))))))))))..))))))..).......	-23.6	[8, 30, 64, 85]	77	5 success	Coordinates	published		valid	2-pass					Y	PCG-UTR-exon	N	Not tested: not intergenic	3
PID0639	Wang2016-nz	Fugra	Fg-HN-milR4		CM000574.1:10743730-10743840:+	AACM00000000.2_scaffolds	CM000574.1:10743738-10743832:+	GCA_000240135.3_ASM24013v3	gene, TE	AGGAACGGGGUACUGCAGUCUAC	FALSE	GAACAAAAAAAGGAACGGGGUACUGCAGUCUACAUCUUGAAAGACUCCACCUGACGAUAACCUCAUUUUCACAGGAGCCCGGAUUUGCCAGAUCCUUUCCUAUAGGUAUUU	..........(((((.(((((.(((((((((...(((((............(((.(((......))).))))))))....))).))).)))))))))))))..........	-19.9	[8, 32, 78, 102]	94	5 success	Coordinates	published		valid	2-pass					Y	none	Y	N	3
PID0640	Wang2016-nz	Fugra	Fg-HN-milR5		CM000574.1:11676586-11676680:+	AACM00000000.2_scaffolds	CM000574.1:11676594-11676644:+	GCA_000240135.3_ASM24013v3	gene, TE	UGAGGUUGUAGCGGAGGUCGA	FALSE	ACGAUGAAGGUGAGGUUGUAGCGGAGGUCGACCCCACUGCCUUGGUAGUAACCUCCACCAUGAAUCCAUACUGCCACCGGGAGUUUCUCGUUGUA	(((((((.((((((((((..((.(((((.(......).))))).))..)))))).))))(((....)))(((.((...)).)))...))))))).	-30.2	[8, 30, 35, 58]	50	5 success	Coordinates	published		valid	3-pass_rep					Y	PCG-CDS-exon	N	Not tested: not intergenic	4
PID0641	Wang2016-nz	Fugra	Fg-HN-milR6		CM000574.1:2786882-2786989:-	AACM00000000.2_scaffolds	CM000574.1:2786890-2786981:-	GCA_000240135.3_ASM24013v3	gene, TE	UUACUGUCAAGCUCAUAUCUC	FALSE	UUUUUUUUUUUUACUGUCAAGCUCAUAUCUCUGCAAGGAUCGAAUGAGUACAACAUUCAUACAUUGAACCAUGAGAAGUAUGUAAGGUUGGCUGGUAUGAGAGGACGC	...(((((((.(((((((((.(((((((.(((.((.((.((((((((((.....))))))...)))).)).))))).)))))..)).))))).)))).)))))))...	-27.8	[8, 30, 74, 99]	91	5 success	Coordinates	published		valid	1-fail					Y	none	Y	N	4
PID0642	Wang2016-nz	Fugra	Fg-HN-milR7		-	AACM00000000.2_scaffolds	-	-	-	UCGGUUGUAGGAAAGCAAGGAA	-	-	-	-	-	-	5 success	Coordinates	published		secondary structure in duplex	-	-	-	-	-	-	not evaluated: hairpin invalid	-	-	-
PID0643	Wang2016-nz	Fugra	Fg-HN-milR8		CM000574.1:5381073-5381226:-	AACM00000000.2_scaffolds	CM000574.1:5381093-5381208:-	GCA_000240135.3_ASM24013v3	gene, TE	UUAUAUAUUUUUUGACUGUCAA	FALSE	CAAGUUCGCAAUAUAAAGUAUUAUAUAUUUUUUGACUGUCAAUCGAGCCCUGUGCCUUUUUAACCUUAUUGUUGAGAACAAGGAGAUAUUAGGAAGGUUUAGGCUUCGAUUGAAAGUCAGGAAAUGUAUAUAUAUUUUGUAUUGUGAGCUUGUA	(((((((((((((((((((((((((((((((((((((.(((((((((.((((.((((((((((.(((.(((((...))))).)))...)))))))))).)))).))))))))).)))))))))))))))).)))))))))))))))))))))..	-74.5	[18, 41, 109, 133]	115	5 success	Coordinates	published		valid	3-pass_rep					Y	none	Y	N	2
PID0644	Wang2016-nz	Fugra	Fg-HN-milR9		CM000574.1:10112530-10112662:-	AACM00000000.2_scaffolds	CM000574.1:10112538-10112654:-	GCA_000240135.3_ASM24013v3	gene, TE	GAUAAGGAGUGGUCGAGCGGGA	FALSE	AUUUCCUUUCGAUAAGGAGUGGUCGAGCGGGAUACGCUACCUAAAAAAAACCUUCAAGCUCUCAAACAAUCUCUACCUAAAAAAACCUAAUACCACAUUCUCCCUGUUCGACCGCUCCUUAUCUUUUGGAAUU	..((((....(((((((((((((((((((((.......................................................................)))))))))))))))))))))....))))..	-40.18	[8, 31, 101, 124]	116	5 success	Coordinates	published		valid	3-pass_rep					Y	none	Y	N	2
PID0645	Wang2016-nz	Fugra	Fg-HN-milR10		CM000574.1:10724137-10724267:-	AACM00000000.2_scaffolds	CM000574.1:10724138-10724266:-	GCA_000240135.3_ASM24013v3	gene, TE	UGGAGACGAAUGCGAUCUUU	FALSE	AAAAGAUCGCAUUCGUCGCUACCUCAGACGACACCCCUUGUGUCGUGCAAAGCUAGGACUCUUGUUCUGAAAGCCCUAACUUUUCACGGCAUGAGGGAUAGCGCCUCAGAUGGAGACGAAUGCGAUCUUUU	(((((((((((((((((.(((.((.((.((....(((((((((((((.((((.((((...(((.......))).)))).)))).)))))))))))))....)).)).)).))).)))))))))))))))))	-62.5	[1, 22, 108, 129]	128	3 invalid_sequence	Fail/lacking	recovered		valid	1-fail					Y	near-PCG	N	Not tested: not intergenic	4
PID0646	Wang2016-nz	Fugra	Fg-HN-milR11		CM000575.1:2257626-2257769:+	AACM00000000.2_scaffolds	CM000575.1:2257634-2257760:+	GCA_000240135.3_ASM24013v3	gene, TE	UGGCAUGUUGGACAAAAGGUGUA	FALSE	UUUCGGACGGUGGCAUGUUGGACAAAAGGUGUAUGUUUUGGGGGGUCAGACGGUGACAUCGGAUGGGUUCCGGGUGUUUUUUGUUGCUGGGUAUGGUAAAUUGAACUUAUCAUCUUCUGUCAAGGCUAUGCUGUUGGUAGAGAG	((((...((((((((((((.((((.((((((((.((((.......(((..(((((((((((((.....)))))........))))))))....)))......)))).)).)))))).))))..))).)))))))))...)))).	-37.3	[8, 32, 107, 134]	126	5 success	Coordinates	published		valid	2-pass					Y	none	Y	N	3
PID0647	Wang2016-nz	Fugra	Fg-HN-milR12		CM000575.1:3418672-3418918:+	AACM00000000.2_scaffolds	CM000575.1:3418685-3418908:+	GCA_000240135.3_ASM24013v3	gene, TE	UGUGACGGUUGGGUUUCUAA	FALSE	UGUGGCCUAACGGUUGGGUGUAACUGUUACAAGUCUAAAUAAGAGCUAUUAAUAUAUAAUAGAUAAGAUUUCUAAAAGAUAAACUAAUUUAUAUUAAGUUUAUAUUAAUAGAUAUAUAAGGCAUUAUUAAGUAAUAGUAAAGUAUUAUAUCUCUUAAUAGUAAAUAGAGUAAAUUAAGCGUAUUUAGGUAAAGAAGUCUUAUUAAUAGCUAGUAAGCUGUGACGGUUGGGUUUCUAAAUAGGUAAAC	....(((((....(((((..(((((((((((.(.((...((..(((((((((((...........((((((((...(((((..(((((((((.....(((((((((((.(((((((....((.((((((.....)))))).))..))))))).))))).))))))...))))))).))..)))))......)))))))))))))))))))..))))))))))))))))....))))).)))))....	-52.2	[13, 34, 215, 236]	223	5 success	Coordinates	published		valid	2-pass					Y	PCG-intron	N	Not tested: not intergenic	3
PID0648	Wang2016-nz	Fugra	Fg-HN-milR13		CM000575.1:2620855-2621202:-	AACM00000000.2_scaffolds	CM000575.1:2620865-2621194:-	GCA_000240135.3_ASM24013v3	gene, TE	UGGAAUGCUGCAUAUACUCAC	FALSE	CGUCAUGACAGAGUUUGUCUCGGAUGUUCCAAGAACCAGAUUUCCAGGGAUAUCGCUAGAUCGAUACACCCUUGCUUUGUUCGAACGAGUCGAAAGGCCUCCCCAUGAGAAAGCGCAGAGGUGAAGCCACUAGCAUGCAUUAGUAAAUAAAAUCCCACUGUAAAUCGAACCAGUGCUUACUUCAGCCAUAAAGAAUCCACUAGACAUUCUGUGUUCGUAACCCAAAUACUCGGAUGCCUUGUCCAAUGGCUCCCACCCAAGGGCAUAUUGGGCAGUCUGAUGUUUAAGUAGUUGUUAGUCAAGUUGAUAAUGUUCCUUGGAAUGCUGCAUAUACUCACUUCAUUGGCU	.(((((((..((((.(((..(((.((((((((((((((((..((.((((((.(((((((.......((((((((((((.((.....(((((....)).))).....)).)))))).)).))))......)))))..((...(((((.........(((((..........))))).)))))...))......)))))).)).))...)))).))))...((..(((((.((((((....(((((((((((((........)))).))))))))))))))))))))..)).((((((((.....)))))))).....))))))))))).))).))))...))).)))).	-84.2	[8, 32, 315, 337]	329	5 success	Coordinates	published		valid	2-pass					Y	PCG-CDS-exon	N	Not tested: not intergenic	4
PID0649	Wang2016-nz	Fugra	Fg-HN-milR14		CM000575.1:3418255-3418361:-	AACM00000000.2_scaffolds	CM000575.1:3418262-3418353:-	GCA_000240135.3_ASM24013v3	gene, TE	UCUUGAUAGUGAAUAGAGCGG	FALSE	GUGUCACGUCUCUUGAUAGUGAAUAGAGCGGGUUAGGCGUAUUCAGGUAAAGAAGUCUUAUUGAUAGCUAGUGAGCUAGGUUCUAUCUAAUGCUAAGAGAGUGUCCU	..(.(((.(((((((.((....(((((((((.((((((....((((...(((....))).))))..)))..))).))..)))))))....)).)))))))))).)..	-23.5	[8, 30, 75, 99]	91	5 success	Coordinates	published		valid	3-pass_rep					Y	none	Y	Y	1
PID0650	Wang2016-nz	Fugra	Fg-HN-milR15		CM000575.1:4472900-4472973:-	AACM00000000.2_scaffolds	CM000575.1:4472910-4472963:-	GCA_000240135.3_ASM24013v3	gene, TE	UGAGUAAAUUCAGAACGCUUGA	TRUE	GAGCCCAGUUUCAAGCCUUCUCAAUUUACUCAAAAAUAUCUUUGAGUAAAUUCAGAACGCUUGAAACUGUGCGU	..((.(((((((((((.((((.((((((((((((......)))))))))))).)))).))))))))))).))..	-36.4	[10, 33, 40, 63]	53	5 success	Coordinates	published		valid	3-pass_rep					Y	near-PCG	N	Not tested: not intergenic	2
PID0651	Wang2016-nz	Fugra	Fg-HN-milR16		-	AACM00000000.2_scaffolds	-	-	-	UGGGAACUUGGAUGAAGCGA	-	-	-	-	-	-	5 success	Coordinates	published		secondary structure in duplex	-	-	-	-	-	-	not evaluated: hairpin invalid	-	-	-
PID0652	Wang2016-nz	Fugra	Fg-HN-milR17		CM000576.1:96045-96372:+	AACM00000000.2_scaffolds	CM000576.1:96056-96362:+	GCA_000240135.3_ASM24013v3	gene, TE	UGAGUAGAAUGUAAAGGGUAA	FALSE	CACCUUUCCGAGUAGUCUUUAGUAUUCCAUGCUCUCCAGGACGCUGGAGCCCUAUCCCAAGCACCCCCUGUGAUAGUCCUGGCAAACUUUGCUGUCUUUUCUGUGUCCUCCCACGGACCUCCAAGCAUACGUUCCCAAUUCUUGAAUAGUCGGACGUAAUUUGGCCUCGCAGUAUUCCUAUAGGCAAUUUUUCCUACACUGGCUAUAUUGCCAAUUCUGAACCCUUGAACUGAAAUGAUAUCGAGUAAUUCAAAAUCCACCUUGAGACGUGCUGGGAGUCCCCCUGCUGCUGAGUGAUGAGUAGAAUGUAAAGGGUAAUAAAUAGGAU	..(((.......((.((((((.(((((..((((((((((....)))))((((((((.((.........)).)))))....)))......((((......((((((......))))))......))))(((((((.................)))))))....((.(((.((((((..((..(((...............((((......))))....((((..(((((.(......)...)))))...)))).......)))..))..)))))).))).))....(((....)))...)))))))))))))))).))......)))..	-76.5	[11, 36, 295, 317]	306	5 success	Coordinates	published		valid	1-fail					Y	PCG-CDS-exon	N	Not tested: not intergenic	4
PID0653	Wang2016-nz	Fugra	Fg-HN-milR18		CM000576.1:3930306-3930461:+	AACM00000000.2_scaffolds	CM000576.1:3930314-3930432:+	GCA_000240135.3_ASM24013v3	gene, TE	UGGGCUGAGGUGGUGGUGGGCA	FALSE	UUGCAUCUUCUGGGCUGAGGUGGUGGUGGGCACAUCCCGGCACUGUAUAUUCUUAGCUUAGCACCCUUUGUCGGAAACAUGGCUGAUGGUUGCGCUGUGUUGCACUUGCCCUCAAUCCCGGUCUAGACCUUGUCUCGUGAGCCAACGAGGGGCAAU	..(((...(((((((((.((...(((.(((((.....((((((.((.((.((((((((......((......))......)))))).)).)).)).))))))....))))))))..)))))))))))...)))(((((......))))).......	-48.6	[8, 31, 106, 126]	118	5 success	Coordinates	published		valid	2-pass					Y	none	Y	N	3
PID0654	Wang2016-nz	Fugra	Fg-HN-milR19		CM000576.1:6228266-6228364:+	AACM00000000.2_scaffolds	CM000576.1:6228274-6228356:+	GCA_000240135.3_ASM24013v3	gene, TE	ACAUACGACCAUAGCUCGCAGAG	TRUE	AAAGACUUGUACAUACGACCAUAGCUCGCAGAGAACUCGGGAUCCCGUCCGCUCUCCCAUAGAUAAGCUGCGAAGCGCUGGAUUAGUAGUUGGGUCGGU	...((((((.((.(((..(((..((((((((....((.((((............))))..)).....))))).)))..)))....)))))))))))...	-25.2	[8, 30, 67, 90]	82	5 success	Coordinates	published		valid	2-pass	RF00001	5.53e-43	5S ribosomal RNA	rRNA	Y	none	Y	N	4
PID0655	Wang2016-nz	Fugra	Fg-HN-milR20		CM000576.1:6298440-6298508:+	AACM00000000.2_scaffolds	CM000576.1:6298448-6298500:+	GCA_000240135.3_ASM24013v3	gene, TE	AGGGAAAGAUGGGUAGAUGCA	FALSE	ACUGGCGCAAAGGGAAAGAUGGGUAGAUGCAAAAGGCGGCAUCGUCGCUCAUCUUUCAGGUGGCUUGUA	((.(((.((....(((((((((((.(((((........)))))...)))))))))))...))))).)).	-26.5	[8, 30, 37, 60]	52	5 success	Coordinates	published		valid	2-pass					Y	near-PCG	N	Not tested: not intergenic	3
PID0656	Wang2016-nz	Fugra	Fg-HN-milR21		CM000576.1:6298440-6298508:+	AACM00000000.2_scaffolds	CM000576.1:6298448-6298500:+	GCA_000240135.3_ASM24013v3	gene, TE	AGGGAAAGAUGGGUAGAUGCA	FALSE	ACUGGCGCAAAGGGAAAGAUGGGUAGAUGCAAAAGGCGGCAUCGUCGCUCAUCUUUCAGGUGGCUUGUA	((.(((.((....(((((((((((.(((((........)))))...)))))))))))...))))).)).	-26.5	[8, 30, 37, 60]	52	5 success	Coordinates	published		valid	2-pass					Y	near-PCG	N	Not tested: not intergenic	3
PID0657	Wang2016-nz	Fugra	Fg-HN-milR22		CM000576.1:1015298-1015387:-	AACM00000000.2_scaffolds	CM000576.1:1015308-1015378:-	GCA_000240135.3_ASM24013v3	gene, TE	AUCGCUGUGGAAGAAACGUGGA	FALSE	UCACUAUCUUUUCGUCAUUCUUCGCACCGUCCAGCGCUCUCUCUACAAGGGUAUCACUAUCGCUGUGGAAGAAACGUGGAAGAAAAAGUG	.((((.(((((((((..((((((.(((.....((((.......(((....))).......)))))))))))))))).))))))...))))	-20.1	[9, 39, 56, 79]	70	5 success	Coordinates	published		valid	2-pass					Y	PCG-intron	N	Not tested: not intergenic	3
PID0658	Wang2016-nz	Fugra	Fg-HN-milR23		CM000576.1:3376564-3376644:-	AACM00000000.2_scaffolds	CM000576.1:3376572-3376636:-	GCA_000240135.3_ASM24013v3	gene, TE	UGGAGAACAGUGUAGACAGCCC	FALSE	GAAAAGACCCUGGAGAACAGUGUAGACAGCCCAGAGACCAGCGCGGGCGGGAGUGCUAGGGAUGUACUCGGGGGUCACAUA	.....((((((.(((.(((.(.(((.((.(((.....((.....))..)))..))))).)..))).))).)))))).....	-27.9	[8, 31, 48, 72]	64	5 success	Coordinates	published		valid	2-pass					Y	PCG-CDS-exon	N	Not tested: not intergenic	4
PID0659	Wang2016-nz	Fugra	Fg-HN-milR24		-	AACM00000000.2_scaffolds	-	-	-	UGGCUUGGAAGACACGGGCAUA	-	-	-	-	-	-	5 success	Coordinates	published		secondary structure in duplex	-	-	-	-	-	-	not evaluated: hairpin invalid	-	-	-
PID0660	Wang2016-nz	Fugra	Fg-HN-milR25		CM000576.1:6274314-6274458:-	AACM00000000.2_scaffolds	CM000576.1:6274334-6274440:-	GCA_000240135.3_ASM24013v3	gene, TE	UCAAACUUUAGCGAUGUGUGA	TRUE	GUCCUGGUCGUGGAAGGGCCACACAUCGCCAAAGUUUGAGAGAGCUGCAGUGACCGUCUUACUAUGAGCCUCGGGUUCAUAGCAAGAUGUCCAUUGUCGCGCUCUCAAACUUUAGCGAUGUGUGACCCUUCCAUGAUCGGCUCCA	...(((((((((((((((.((((((((((.((((((((((((.((.((((((..((((((.(((((((((...))))))))).))))))..)))))).)).)))))))))))).)))))))))).))))))))))))))).....	-94.1	[18, 42, 100, 124]	106	5 success	Coordinates	published		valid	3-pass_rep					Y	none	Y	N	2
PID0661	Wang2016-nz	Fugra	Fg-HN-milR26		CM000577.1:572153-572283:+	AACM00000000.2_scaffolds	CM000577.1:572163-572273:+	GCA_000240135.3_ASM24013v3	gene, TE	GGCAACUUGGUCUUGGGCUU	TRUE	UACUCUAAUCGGGCUCAAGAUCAAGUUGUCUUGCUUUUCAAGUAUGCUGUGGUGGUCGCGGUCGUAGGUCGUUGACUGAUCACAGCAUACUUGAGAAGCAAGGCAACUUGGUCUUGGGCUUGCGCUUUUAC	.........((((((((((((((((((((((((((((((((((((((((((((((((((((.(....)))).))))).)))))))))))))))))))))))))))))))))))))))))))).........	-82	[10, 32, 98, 120]	110	5 success	Coordinates	published		valid	2-pass					Y	none	Y	N	3
PID0662	Wang2016-nz	Fugra	Fg-HN-milR27		CM000577.1:3157595-3157691:+	AACM00000000.2_scaffolds	CM000577.1:3157632-3157681:+	GCA_000240135.3_ASM24013v3	gene, TE	GCACAUGACUGUGGCCAUGGCU	FALSE	GCGGCAUUAUGGUGCCCAUGAUAGGCUCAUACGAAAUGUCCGUGGCUAUAGAAUGUGCGCUGUUAGCACAUGACUGUGGCCAUGGCUUGAGCUGCCG	.(((((((((((...))))))).((((((..........((((((((((((.((((((.......))))))..))))))))))))..))))))))))	-43.1	[37, 59, 63, 86]	49	5 success	Coordinates	published		valid	2-pass					Y	PCG-UTR-exon	N	Not tested: not intergenic	3
PID0663	Wang2016-nz	Fugra	Fg-HN-milR28		-	AACM00000000.2_scaffolds	-	-	-	UGAUGGACUUGGACGUCGGCAA	-	-	-	-	-	-	5 success	Coordinates	published		secondary structure in duplex	-	-	-	-	-	-	not evaluated: hairpin invalid	-	-	-
PID0664	Wang2016-nz	Fugra	Fg-HN-milR29		CM000577.1:7772806-7772899:+	AACM00000000.2_scaffolds	CM000577.1:7772814-7772892:+	GCA_000240135.3_ASM24013v3	gene, TE	GUUGAACGAACCUUGGCCGAA	FALSE	UGACAAUAUCGUUGAACGAACCUUGGCCGAACCUCUCUCACUCGAAAACCCGAACACACUAACCUCGUCACGAUGCUCGCUCAACGUGUUGGCG	...(((((.((((((.(((.(.((((.(((...........(((......)))...........))).).))).).))).)))))))))))...	-19.2	[8, 30, 63, 86]	78	5 success	Coordinates	published		valid	2-pass					Y	PCG-CDS-exon	N	Not tested: not intergenic	4
PID0665	Wang2016-nz	Fugra	Fg-HN-milR30		-	AACM00000000.2_scaffolds	-	-	-	GGGUCUGUGUAACCUCCCGGUUU	-	-	-	-	-	-	5 success	Coordinates	published		secondary structure in duplex	-	-	-	-	-	-	not evaluated: hairpin invalid	-	-	-
PID0666	Wang2016-nz	Fugra	Fg-HN-milR31		CM000577.1:7080427-7080536:-	AACM00000000.2_scaffolds	CM000577.1:7080437-7080526:-	GCA_000240135.3_ASM24013v3	gene, TE	UGGAGAAAAUUGAGAAGGCUCGA	FALSE	GAACUGAAGCUCGAGCCUUCUCAAUUUUCUCCAUGUCAUCAACAGAAGGGUCCAUAUGGAUCUUUCUGUUGAAAACAUGGAGAAAAUUGAGAAGGCUCGAGCUUGUAACG	......((((((((((((((((((((((((((((((..(((((((((((((((....)))))))))))))))..))))))))))))))))))))))))))))))......	-79.6	[10, 34, 75, 99]	89	5 success	Coordinates	published		valid	1-fail					Y	none	Y	N	4
PID0667	Wang2016-nz	Fugra	Fg-HN-milR32		CM000577.1:7214543-7214828:-	AACM00000000.2_scaffolds	CM000577.1:7214552-7214820:-	GCA_000240135.3_ASM24013v3	gene, TE	UCUGGCAUUGUUGUGAUGAA	FALSE	ACACUGACGCUCUGGCAUUGUUGUGAUGAAGUAGCGUUUGGCUGGUGUGGGAAAGGGGUUUGGCCAUCCACACUCAAAGUCAAACCUCCAAGGCUCGCCUAUGCGUGGUCCUCCUGCCAUGCGAAAGCGAAAAGCCUUCCCGAAGAAUGGAUCGUGGAAAAUGAGUGCCCAGUCGCAGUUCCUGCCCUCGAUGGUGGGGCUGUACAUGUCGACGCUCAGUUCCAUGGUCCUUUCGACACGGCGCCUUACGGCCAUUUCAUCACGAUAGUGCCAGAACGUUGGUGUU	(((((((((.((((((((((((((((((((((.((((..((((.((((((((..((((((((((..............))))))))))..((((((((...((((((((......))))))))...))))...))))))))...(((.(((((((((((..(((((((.((((.((((((((.(((......))))))))))))).))..).)))))).))))))))))).))).)))).).)))..)).)).)))))))))))))))))))))).))))))))).	-139.7	[8, 29, 255, 276]	268	5 success	Coordinates	published		valid	1-fail					Y	PCG-CDS-exon	N	Not tested: not intergenic	4
PID0668	Wang2016-nz	Fugra	Fg-HN-milR33		CM000577.1:7215152-7215334:-	AACM00000000.2_scaffolds	CM000577.1:7215162-7215324:-	GCA_000240135.3_ASM24013v3	gene, TE	UCAGAGCGGUGAUUGAUCAAGAU	FALSE	CAAAGUUCAAAUCUUGUCAAUUAUCGGUCUGAUCUGAUGAGCAGUAGAGUUCAAGUGGUUAAUGAUGUUGUAGAUGGAAAGAUUUACUAUAAGUUUAUCUACCCAUCAAACAGUAUUGUUCUCCAUUUAACCCACAUUGCCUCUGUCUGAUCAGAGCGGUGAUUGAUCAAGAUUUGAACUUCG	..((((((((((((((((((((((((.(((((((.((((((((((.(.(((.((((((..(((((((((((.(((((..((((..(((...)))..))))..)))))..)))))))))))..))))))))).)..)))).))).))).))))))).)))))))))).))))))))))))))..	-77.6	[10, 33, 148, 172]	162	5 success	Coordinates	published		valid	3-pass_rep					Y	none	Y	N	2
PID0669	Wang2016-nz	Fugra	Fg-HN-milR34		CM000574.1:1084492-1084801:+	AACM00000000.2_scaffolds	CM000574.1:1084500-1084793:+	GCA_000240135.3_ASM24013v3	gene, TE	CGGGCUGGGUCUUGGGGAGGGG	FALSE	UUCACUAACGCGGGCUGGGUCUUGGGGAGGGGUCGCAGAUGGAGGGUGUGCAAGUAACCUGGUGGAUUACAGAAUAACUGCGAAUCUGAGCCCCUAUAUUCUGACUCCAACACAAACAAAUUGUGGUAUUCCUUUCUCUGGUUUAUUUUCACCCACCGGGCAAGGUCAAGCCAGCGGGCACCCUGGCAAUUAAACGUCGGGGAGGGUGUAGUGGAGCCCAUGAAGGUGAAUUCGAGGGCAAAAUACAUCCAUACAUUGGGAAGAGGCACCUGGCUGGCCCCUUCCCUGUCCCUCCACCCGUCUUGCUCAA	.....(((.(((((..(((.(..((((((((((((((.((.....)).)))......((((((((....(((((((...((........)).....))))))).......(((((.....)))))(((..((.......))..)))......))))))))........((((((..(.(.(((((((........))))))).(((((((.....((((.((((......)))).))))....)))))))..............).)..))))))))))))))))).).)))....))))).))).....	-111	[8, 31, 277, 301]	293	5 success	Coordinates	published		valid	3-pass_rep					Y	none	Y	N	2
PID0670	Wang2016-nz	Fugra	Fg-HN-milR35		CM000574.1:1351324-1351394:+	AACM00000000.2_scaffolds	CM000574.1:1351332-1351387:+	GCA_000240135.3_ASM24013v3	gene, TE	AGUCAACGUAUGGAGCUAUGGCU	FALSE	AUUCCGACCAAGUCAACGUAUGGAGCUAUGGCUUCCCCCAGCUAUAGCUCCAUACGUUGACUUAUCAUGAC	.........((((((((((((((((((((((((......))))))))))))))))))))))))........	-41.2	[8, 32, 39, 63]	55	5 success	Coordinates	published		valid	2-pass					Y	PCG-intron	N	Not tested: not intergenic	3
PID0671	Wang2016-nz	Fugra	Fg-HN-milR36		CM000574.1:6007701-6007771:+	AACM00000000.2_scaffolds	CM000574.1:6007711-6007761:+	GCA_000240135.3_ASM24013v3	gene, TE	GGCUGGUGCUGGUGCAGAUUUGGAGCA	TRUE	CCGUCAGCUCCCGGAUCAGCACAGCCUACCAGCUUUCUUGGCUGGUGCUGGUGCAGAUUUGGAGCACAUCA	......(((((.(((((.(((((((..(((((((.....)))))))))).)))).))))))))))......	-33.3	[10, 34, 38, 60]	50	5 success	Coordinates	published		valid	3-pass_rep					Y	PCG-UTR-exon	N	Not tested: not intergenic	2
PID0672	Wang2016-nz	Fugra	Fg-HN-milR37		-	AACM00000000.2_scaffolds	-	-	-	UGUGAAAUGUGAGGGGCUC	-	-	-	-	-	-	3 invalid_sequence	Fail/lacking	recovered		recovered no valid hairpins	-	-	-	-	-	-	not evaluated: hairpin invalid	-	-	-
PID0673	Wang2016-nz	Fugra	Fg-HN-milR38		-	AACM00000000.2_scaffolds	-	-	-	UCGAGCUAGGAACGGAAGCCA	-	-	-	-	-	-	5 success	Coordinates	published		secondary structure in duplex	-	-	-	-	-	-	not evaluated: hairpin invalid	-	-	-
PID0674	Wang2016-nz	Fugra	Fg-HN-milR39		CM000574.1:1521613-1521808:-	AACM00000000.2_scaffolds	CM000574.1:1521623-1521777:-	GCA_000240135.3_ASM24013v3	gene, TE	GUUCUUUGCGAUCGUCUCAAGCA	FALSE	AGAGCACUACCCGUUCAAAGGCGACCGGCACCGGUUGGGGCAGAGAAGCAGGAACAAUAUCAUCAUCAAGCAGAGAAUCUUUAAAAAGACCCGCCACGCUUCAUGCGCCGUGCAAGGCGAUUUCCCCUCCCCCCUCAUGUUCACCAGUGAAAACCCAUCUUUUGUUCUUUGCGAUCGUCUCAAGCAUUAGUGCUUC	.((((((((.(((.((......)).)))....(.(((((((.((...((((((((((......(((.((((.(.(..((((....))))..).)...)))).)))((((......))))...............((((........))))...........)))))).))))..))))))))).)..)))))))).	-46.4	[31, 56, 161, 185]	154	5 success	Coordinates	published		valid	2-pass					Y	none	Y	Y	2
PID0675	Wang2016-nz	Fugra	Fg-HN-milR40		CM000574.1:6821114-6821192:-	AACM00000000.2_scaffolds	CM000574.1:6821125-6821184:-	GCA_000240135.3_ASM24013v3	gene, TE	GAGGGAGGAGGUCUAAAGAUU	FALSE	GGCAUUCUUAGAGGGAGGAGGUCUAAAGAUUUCAUCUUGUAUCCUCGUGUUUUUGACUCUUCCCUCUGUUUGGGCGUCU	(((.(((.((((((((((((.((.((((((..................))))))))))))))))))))...))).))).	-25.5	[8, 30, 47, 67]	59	5 success	Coordinates	published		valid	2-pass					Y	none	Y	N	3
PID0676	Wang2016-nz	Fugra	Fg-HN-milR41		CM000574.1:7889020-7889356:-	AACM00000000.2_scaffolds	CM000574.1:7889031-7889348:-	GCA_000240135.3_ASM24013v3	gene, TE	UGGGUCUGGGAGUGGUAGGGGA	FALSE	CGAGUGCGACUGGGUCUGGGAGUGGUAGGGGAAUUACCAUGAUUGCGGAUUUUGCUGUGGGAGGCUUGUCAGGGACGAGUGACGUGCGGCGACAACUUUCAUCAUGAUUUCUUGGUGGAGGAAUACAUGAUGAGGCCAGAUCUCGCGGGCCGGAAUAAUGACAGUCCGACAUAAGAUGCUUACCCUGGAUCUCGAAGUCGUCUAGGGAGUUUACUUCGUUCGAACAGGAGCAAUUGGAGGUUCAAAUCGUCAUACGUUUCAACGAGAUGUACUGCAGUAAAGGUACUGAAAUUCUAAGGUGACAACACUAGUCUCUCAGUCCAGUUCGUUGGUCUCC	.(((.(((((((((.(((((((.(.(((.(...(((((..((((.(((.(((((((((((....(((((..((((((.((((((...(((.......((((((((((((((((....))))))).))))))))))))..((((.((((((.(.........).))))).)...))))(((..((((((((.........)))))))))))..(((((((((......)))).....)))))......)))))).)))))).))))).....)))))))))))...))).))))....)))))...).))).))))))))))))).))))....))).	-106.7	[8, 31, 303, 325]	317	5 success	Coordinates	published		valid	1-fail					Y	PCG-intron	N	Not tested: not intergenic	4
PID0677	Wang2016-nz	Fugra	Fg-HN-milR42		-	AACM00000000.2_scaffolds	-	-	-	CGUAGGAUUCUGAGCGACGACC	-	-	-	-	-	-	5 success	Coordinates	published		secondary structure in duplex	-	-	-	-	-	-	not evaluated: hairpin invalid	-	-	-
PID0678	Wang2016-nz	Fugra	Fg-HN-milR43		CM000575.1:893840-893965:+	AACM00000000.2_scaffolds	CM000575.1:893859-893955:+	GCA_000240135.3_ASM24013v3	gene, TE	UGGGAGGGUGUGGAGAGGAA	FALSE	ACUCGGUGCUGGACGACAUGACCUUUCCCCGCUCUCCAGACAGCUCGGCUUGCUGGCCGAACCAGGAUUCACUCGGUUUGAUUCAACUCCAGAGCGUGGGAGGGUGUGGAGAGGAAUAUAGAGAGG	..(((........))).....(((((((.((((((((..((.((((((((....))))(((((((......)).)))))............)))))).)))))))).)))))))............	-43.5	[19, 42, 94, 115]	96	5 success	Coordinates	published		valid	3-pass_rep					Y	none	Y	N	2
PID0679	Wang2016-nz	Fugra	Fg-HN-milR44		-	AACM00000000.2_scaffolds	-	-	-	GUGGAUGGGAACUGGGUGGGUU	-	-	-	-	-	-	5 success	Coordinates	published		secondary structure in duplex	-	-	-	-	-	-	not evaluated: hairpin invalid	-	-	-
PID0680	Wang2016-nz	Fugra	Fg-HN-milR45		CM000575.1:6472000-6472181:+	AACM00000000.2_scaffolds	CM000575.1:6472008-6472065:+	GCA_000240135.3_ASM24013v3	gene, TE	UGUCUCUGGAUCUGUUGACGA	FALSE	AUCCUUAGAGUGUCUCUGGAUCUGUUGACGAUAAAUAUUUCUGAACCUUGACUUCUCCUUCAUACUUCUCAUACUUCAUGCAAUUUUCUUUCAAGACUGGUGAACCUUCCAACAUGGCGACUCUUGAUGCCCUGCGUAUCGCCCUUCGGCAGCAAAUCCCGUCGGAAGCAUCUACCAAGGCU	.......((((((....(((((.(((.(.((........))).)))...))....)))...))))))..............................((((((..(((((...((((.((...(((.((((..(((...))).....)))).))).)))))).)))))..)).)))).....	-30.8	[8, 30, 39, 65]	57	5 success	Coordinates	published		valid	2-pass					Y	near-PCG	N	Not tested: not intergenic	3
PID0681	Wang2016-nz	Fugra	Fg-HN-milR46		CM000575.1:6679624-6679700:+	AACM00000000.2_scaffolds	CM000575.1:6679632-6679697:+	GCA_000240135.3_ASM24013v3	gene, TE	GGAGGAGGCGACUGCGACUGGG	FALSE	GGUAACGGGUGGAGGAGGCGACUGCGACUGGGACGCUACAGGCGAGGUCGCAGACGUAGUUUCCUGCUCAGAAGCCA	......((.(.(((.(((.(((((((.(((.((((((...)))...))).))).))))))).))).)))...).)).	-31.4	[8, 31, 48, 73]	65	5 success	Coordinates	published		valid	2-pass					Y	PCG-CDS-exon	N	Not tested: not intergenic	4
PID0682	Wang2016-nz	Fugra	Fg-HN-milR47		CM000576.1:3313332-3313505:+	AACM00000000.2_scaffolds	CM000576.1:3313340-3313497:+	GCA_000240135.3_ASM24013v3	gene, TE	UCAGAACUCAGAAGACUCUGUA	FALSE	GAAUUUCGAGUCAGAACUCAGAAGACUCUGUAUAUCCGAACAGCCAGGGCAAGGGUAUCGCCUAUCCUGAAGGACCUAGUCAGUAACGAUGCCAUGCUGAUUACAGGUUAGUCUCCCGGAUCAACCAGCUUGAUCAGGUUAAUUCCAGAGAUCUCUGGGUCUUGAUCGUGCCAU	......(((.((((.(((((((.(((((((..............(((((..(((......))).)))))...(((((((((((((.........))))))))..)))))......((.((((((.....)))))).)).......))))).))))))))).)))))))......	-49.4	[8, 31, 143, 165]	157	5 success	Coordinates	published		valid	2-pass					Y	none	Y	N	3
PID0683	Wang2016-nz	Fugra	Fg-HN-milR48		CM000576.1:6749680-6749823:+	AACM00000000.2_scaffolds	CM000576.1:6749688-6749805:+	GCA_000240135.3_ASM24013v3	gene, TE	GACAAGGAGUGGUCGAGCGGU	FALSE	AUAUACCUUUGACAAGGAGUGGUCGAGCGGUAUCCGUCCUAAAAUAAAAUAAAAAACCUACAAACCUAAAAGCCUUCUCUAAAAACAAACCUAAGCACUUUCACCCGUUCGACCACUCCUUGUCUUUUGCAUUUUUGGGAUUCC	..........((((((((((((((((((((..........................................................................))))))))))))))))))))..((.((....)).))....	-37.53	[8, 30, 103, 125]	117	5 success	Coordinates	published		valid	3-pass_rep					Y	near-PCG	N	Not tested: not intergenic	2
PID0684	Wang2016-nz	Fugra	Fg-HN-milR49		CM000576.1:381967-382157:-	AACM00000000.2_scaffolds	CM000576.1:381975-382149:-	GCA_000240135.3_ASM24013v3	gene, TE	UGGGAAUCUAGAUUGACUCGCA	FALSE	UGAAGCUGCAUGGGAAUCUAGAUUGACUCGCAUGGAAUGGGCUGAGUGUUUGAGUGUCUGGGUAGCCUUGGUUAGACACCAUGUUGGGUGUUUGAGUGGUCUUGGUUGGUGGCUGCAUACAGAAGUGGUGUCCCACGUGGGUGACACGCAUUUGGAUAGAGUUGGUCAAUUUAGCUGGCUGUUUAGCUGGG	...(((((.((((....(((((((((((.((..........(((.((((...(((..((((.(((((....(((((((((......)))))))))..)))..)).))))..))))))).)))((((((((((((.....)).))))).))))).......)).)))))))))))....)))).)))))...	-56.3	[8, 31, 159, 182]	174	5 success	Coordinates	published		valid	2-pass					Y	none	Y	N	3
PID0685	Wang2016-nz	Fugra	Fg-HN-milR50		CM000576.1:1383044-1383145:-	AACM00000000.2_scaffolds	CM000576.1:1383054-1383135:-	GCA_000240135.3_ASM24013v3	gene, TE	GGGGAGGUCAGGUAUGAGAUUGA	FALSE	AGCCCUUGUGUGGACAGAUCAUACAUACCUCUCUUUCUGACGAACAUGAUGGCGGUGGGAGCAAAAGGCGGGGAGGUCAGGUAUGAGAUUGAUGCAAGGUGU	.((((((((((.((....((((((..((((((((((((.((...((...))...)).))))........))))))))...))))))..)).)))))))).))	-32.7	[10, 35, 67, 91]	81	5 success	Coordinates	published		valid	3-pass_rep					Y	PCG-CDS-exon	N	Not tested: not intergenic	4
PID0686	Wang2016-nz	Fugra	Fg-HN-milR51		CM000576.1:6274325-6274448:-	AACM00000000.2_scaffolds	CM000576.1:6274334-6274440:-	GCA_000240135.3_ASM24013v3	gene, TE	UCAAACUUUAGCGAUGUGUGA	TRUE	UGGAAGGGCCACACAUCGCCAAAGUUUGAGAGAGCUGCAGUGACCGUCUUACUAUGAGCCUCGGGUUCAUAGCAAGAUGUCCAUUGUCGCGCUCUCAAACUUUAGCGAUGUGUGACCCUUCCAU	((((((((.((((((((((.((((((((((((.((.((((((..((((((.(((((((((...))))))))).))))))..)))))).)).)))))))))))).)))))))))).)))))))).	-81.9	[8, 32, 90, 114]	106	5 success	Coordinates	published		valid	3-pass_rep					Y	none	Y	N	2
PID0687	Wang2016-nz	Fugra	Fg-HN-milR52		-	AACM00000000.2_scaffolds	-	-	-	GAGGGAGGCUAGUGGGAAGGAC	-	-	-	-	-	-	5 success	Coordinates	published		secondary structure in duplex	-	-	-	-	-	-	not evaluated: hairpin invalid	-	-	-
PID0688	Wang2016-nz	Fugra	Fg-HN-milR53		-	AACM00000000.2_scaffolds	-	-	-	GCACAUGACUGUGGCCAUGGCUU	-	-	-	-	-	-	5 success	Coordinates	published		secondary structure in duplex, >20 mismatches in duplex	-	-	-	-	-	-	not evaluated: hairpin invalid	-	-	-
PID0689	Wang2016-nz	Fugra	Fg-HN-milR54		CM000577.1:3543035-3543180:+	AACM00000000.2_scaffolds	CM000577.1:3543043-3543172:+	GCA_000240135.3_ASM24013v3	gene, TE	UAGCAGAAAAGUUGACCUCUUA	FALSE	GCCUACUGGAUAGCAGAAAAGUUGACCUCUUAAGUCUUAGGUUACAAAAAUAAAUAGCCUAAAGAGCAUAGUCCAAGUAGCAUAAGCUGAUCUACUAAUUUCGUCUCUUAUGCUUUCAGCGGCCAAUUUUUCUGGUACCUUGAGGA	.(((...((.((.(((((((((((.((.((....((((((((((..........)))))).)))).............((((((((..(((...........))).))))))))...)).)).))))))))))).))))...))).	-37.9	[8, 31, 115, 137]	129	5 success	Coordinates	published		valid	2-pass					Y	none	Y	N	3
PID0690	Wang2016-nz	Fugra	Fg-HN-milR55		CM000577.1:7036605-7036676:-	AACM00000000.2_scaffolds	CM000577.1:7036613-7036668:-	GCA_000240135.3_ASM24013v3	gene, TE	AAGCUAUUGCUGUCAUCGUCGU	FALSE	CGAGGUUUCGAAGCUAUUGCUGUCAUCGUCGUCAUCUUCGUCGGCUGCAGCUGUAAUCGCGUUGAGACUUGA	..(((((((((.(((((.(((((..(((.((.......)).)))..))))).)))...)).)))))))))..	-22.2	[8, 31, 37, 63]	55	5 success	Coordinates	published		valid	1-fail					Y	PCG-CDS-exon	N	Not tested: not intergenic	4
PID0691	Wang2016-nz	Fugra	Fg-HN-milR56		CM000577.1:7378306-7378387:-	AACM00000000.2_scaffolds	CM000577.1:7378316-7378377:-	GCA_000240135.3_ASM24013v3	gene, TE	GAGGAGAAGUGUUUUGGAAUGU	FALSE	CUAUGCAAAGAUUGAUUCUAGGACUUUUUCAAAGUAUUGAGAUCGAGGUUGAGGAGAAGUGUUUUGGAAUGUCUUUGCUCGG	....((((((((..((((((((((((((((......(((....))).......)))))).))))))))))))))))))....	-23.1	[10, 34, 48, 71]	61	5 success	Coordinates	published		valid	1-fail					Y	PCG-CDS-exon	N	Not tested: not intergenic	4
PID0692	Wang2016-nz	Fugra	Fg-HN-milR57		CM000575.1:4554-4844:+	AACM00000000.2_scaffolds	CM000575.1:4565-4834:+	GCA_000240135.3_ASM24013v3	gene, TE	AGGGGGAAGAAAUAGUAGAA	FALSE	GGGAUAGGUCUUUCUGGCUCAUCUUCCCCUGGAGGAACAGAGGAGCAGAAUGCUUCAGUGGCGCGAAAGCUUUCAUUCAUAAAAUUGUAGAACUCAGGGCUCUGCUCCAGGCCCGUAAGUUCUUCAACAUCGGGACACUAACCCUGAACUUCAUCCUCACGAGCGCUGUUGAUAGCUGAUGGUGUAAAUUUUAACUGCAUGACCUUGCCAAAGGCAUAGAUGAUCUCCAUUACUGCAAUUGUUAGUCUAAAGGAAAAGAGAAGGGGGAAGAAAUAGUAGAAUCUGAAUCCG	.((((.((...(((((.....(((((((((.(((((.((..((((((...))))))..))..((....))..............(((.((((((..((((.(((...)))))))...)))))).)))..(((((........)))))......)))))....(((((((((.....)))))))))...........(((......)))(((..(((..((((.....))))..)))..)))....(((........)))...))))))))).....))))).))..)))).	-78.5	[11, 32, 259, 280]	269	5 success	Coordinates	published		valid	1-fail					Y	PCG-CDS-exon	N	Not tested: not intergenic	4
PID0693	Wang2016-nz	Fugra	Fg-HN-milR58		CM000575.1:2186569-2186767:+	AACM00000000.2_scaffolds	CM000575.1:2186577-2186756:+	GCA_000240135.3_ASM24013v3	gene, TE	GUUACGAUCUGCUGAGGG	TRUE	UGUAUGUCGGUGUUGUUACGAUCUGCUGAGGGUAACGUCCUUCGCCUCGGUUUCCCCAAUGAGGAACUCGUGUCGGAUUGGUAAGACAUCCACCAUCCUCUCAUUCCGCGCGCCAAAGCUAACAUUACUUUAGCUUCAUCGACGAGAUGCUCUGGAAAAAAGAAACCCCCUCUCAGCGUGGCAACAUUGUCGGGAGGCU	.....(.(((((((((((((..(((..(((((...((.....))....((((((.(((..(((.(.(((((...(((((((........)))..))))............((...(((((((.......)))))))...))))))).).))))))......))))))))))).)))))))))))))))).)........	-53.6	[8, 29, 169, 187]	179	5 success	Coordinates	published		valid	2-pass					Y	PCG-intron	N	Not tested: not intergenic	3
PID0694	Wang2016-nz	Fugra	Fg-HN-milR59		-	AACM00000000.2_scaffolds	-	-	-	UUUGGGAUGGCAAAUGGAUAAGA	-	-	-	-	-	-	5 success	Coordinates	published		secondary structure in duplex	-	-	-	-	-	-	not evaluated: hairpin invalid	-	-	-
PID0695	Wang2016-nz	Fugra	Fg-HN-milR60		CM000577.1:7772484-7772835:-	AACM00000000.2_scaffolds	CM000577.1:7772494-7772827:-	GCA_000240135.3_ASM24013v3	gene, TE	GGCAGCAUUGUUGACAGGGCC	FALSE	UCGGCCAAGGUUCGUUCAACGAUAUUGUCAGCGUCGUUACUCCAAAGAGGGCUGGUACAAGAGGAUCGAUGAUGAUGGCUUCCUAUUCUCGAGUAUCGGAACGGACUCUCUCGGCUUCUCGGUCCACAUGAACCAAUAGGAAGCUACCAAUUCCUCAUCUCGGGACACGUGCGAUCCACAUAUCACGUGCUGAGCUUCCAUGACUAAGCACAGUUGAGCUUUAUUGUCUUUUUAAAAUUUUCCGCUGCAUGUGAAUUCUCUUUUCCCUUUCUUCUUUAGAUAGCAAGAACGUUCGUCGCACGCUGUCUCGUGUAGAGAGUGGGCAGCAUUGUUGACAGGGCCUUUGGGCUCG	..(((((((((((..((((((((.(((((.((.((.((((.(((........))).....(((((.......((.((((((((((((.(((.((((((((((.((.....)).).))).))))..)).)))...)))))))))))).))..)))))....(((((((((((((((..((...((((((((..(((..........(((.(((((........)))))))).............)))))))))))..............(((((((......)).))))).))..)))))))).))))))).)))).)))).))))).))))))))..)))))))..))))..	-104.4	[8, 30, 319, 341]	333	5 success	Coordinates	published		valid	2-pass					Y	PCG-UTR-exon	N	Not tested: not intergenic	3
PID0696	Wang2016-nz	Fugra	Fg-JS-milR1		-	AACM00000000.2_scaffolds	-	-	-	GACAACGGGCCGAGGGA	-	-	-	-	-	-	2 invalid_coords	Fail/lacking	recovered		recovered no valid hairpins	-	-	-	-	-	-	not evaluated: hairpin invalid	-	-	-
PID0697	Wang2016-nz	Fugra	Fg-JS-milR2		-	AACM00000000.2_scaffolds	-	-	-	AGGAAAGGCAGAACAGGA	-	-	-	-	-	-	2 invalid_coords	Fail/lacking	recovered		recovered no valid hairpins	-	-	-	-	-	-	not evaluated: hairpin invalid	-	-	-
PID0698	Wang2016-nz	Fugra	Fg-JS-milR3		-	AACM00000000.2_scaffolds	-	-	-	AGAGCAAGAAAAGGGCA	-	-	-	-	-	-	2 invalid_coords	Fail/lacking	recovered		recovered no valid hairpins	-	-	-	-	-	-	not evaluated: hairpin invalid	-	-	-
PID0699	Wang2016-nz	Fugra	Fg-JS-milR4		-	AACM00000000.2_scaffolds	-	-	-	GGCAACGGACGGAGGGA	-	-	-	-	-	-	2 invalid_coords	Fail/lacking	recovered		recovered no valid hairpins	-	-	-	-	-	-	not evaluated: hairpin invalid	-	-	-
PID0700	Wang2016-nz	Fugra	Fg-JS-milR5		-	AACM00000000.2_scaffolds	-	-	-	AAACGAAGCCGAAGCCCA	-	-	-	-	-	-	2 invalid_coords	Fail/lacking	recovered		recovered no valid hairpins	-	-	-	-	-	-	not evaluated: hairpin invalid	-	-	-
PID0701	Wang2016-nz	Fugra	Fg-JS-milR6		-	AACM00000000.2_scaffolds	-	-	-	CGCAAAGACGAAGAGA	-	-	-	-	-	-	2 invalid_coords	Fail/lacking	recovered		recovered no valid hairpins	-	-	-	-	-	-	not evaluated: hairpin invalid	-	-	-
PID0702	Wang2016-nz	Fugra	Fg-JS-milR7		-	AACM00000000.2_scaffolds	-	-	-	GCGGGAGCCAGGGGAGA	-	-	-	-	-	-	2 invalid_coords	Fail/lacking	recovered		recovered no valid hairpins	-	-	-	-	-	-	not evaluated: hairpin invalid	-	-	-
PID0703	Wang2016-nz	Fugra	Fg-JS-milR8		-	AACM00000000.2_scaffolds	-	-	-	GACAAGGAGGGCGAGCGG	-	-	-	-	-	-	2 invalid_coords	Fail/lacking	recovered		recovered no valid hairpins	-	-	-	-	-	-	not evaluated: hairpin invalid	-	-	-
PID0704	Wang2016-nz	Fugra	Fg-JS-milR9		CM000575.1:2144992-2145043:-	AACM00000000.2_scaffolds	CM000575.1:2145014-2145043:-	GCA_000240135.3_ASM24013v3	gene, TE	GAAGGACCACGA	FALSE	GAUGGGUGUUGUGUAAAGGAAGGACCACGAACCUUCUUGGGUGAAAGCAGAA	......((((......(((((((........))))))).......))))...	-9.7	[0, 13, 16, 29]	29	2 invalid_coords	Fail/lacking	recovered		valid	1-fail					Y	PCG-intron	N	Not tested: not intergenic	4
PID0705	Wang2016-nz	Fugra	Fg-JS-milR10		-	AACM00000000.2_scaffolds	-	-	-	GGGCGGAACCCCCGG	-	-	-	-	-	-	2 invalid_coords	Fail/lacking	recovered		recovered no valid hairpins	-	-	-	-	-	-	not evaluated: hairpin invalid	-	-	-
PID0706	Wang2016-nz	Fugra	Fg-JS-milR11		-	AACM00000000.2_scaffolds	-	-	-	CGCCGGGGCCAAG	-	-	-	-	-	-	2 invalid_coords	Fail/lacking	recovered		recovered no valid hairpins	-	-	-	-	-	-	not evaluated: hairpin invalid	-	-	-
PID0707	Wang2016-nz	Fugra	Fg-JS-milR12		-	AACM00000000.2_scaffolds	-	-	-	CCGGAGGGAGGGCA	-	-	-	-	-	-	2 invalid_coords	Fail/lacking	recovered		recovered no valid hairpins	-	-	-	-	-	-	not evaluated: hairpin invalid	-	-	-
PID0708	Wang2016-nz	Fugra	Fg-JS-milR13		-	AACM00000000.2_scaffolds	-	-	-	GAACGAAGAGAGAACAA	-	-	-	-	-	-	2 invalid_coords	Fail/lacking	recovered		recovered no valid hairpins	-	-	-	-	-	-	not evaluated: hairpin invalid	-	-	-
PID0709	Wang2016-nz	Fugra	Fg-JS-milR14		-	AACM00000000.2_scaffolds	-	-	-	AGGCGGCGGAGGGCC	-	-	-	-	-	-	2 invalid_coords	Fail/lacking	recovered		recovered no valid hairpins	-	-	-	-	-	-	not evaluated: hairpin invalid	-	-	-
PID0710	Wang2016-nz	Fugra	Fg-JS-milR15		-	AACM00000000.2_scaffolds	-	-	-	GGACGAACCGGCGAGCA	-	-	-	-	-	-	2 invalid_coords	Fail/lacking	recovered		recovered no valid hairpins	-	-	-	-	-	-	not evaluated: hairpin invalid	-	-	-
PID0711	Wang2016-nz	Fugra	Fg-JS-milR16		-	AACM00000000.2_scaffolds	-	-	-	GAGGGAAAGGAAGCACA	-	-	-	-	-	-	2 invalid_coords	Fail/lacking	recovered		recovered no valid hairpins	-	-	-	-	-	-	not evaluated: hairpin invalid	-	-	-
PID0712	Wang2016-nz	Fugra	Fg-JS-milR17		-	AACM00000000.2_scaffolds	-	-	-	GCGAGGCGAGGAGAGG	-	-	-	-	-	-	2 invalid_coords	Fail/lacking	recovered		recovered no valid hairpins	-	-	-	-	-	-	not evaluated: hairpin invalid	-	-	-
PID0713	Wang2016-nz	Fugra	Fg-JS-milR18		-	AACM00000000.2_scaffolds	-	-	-	AGGAACAGAAAAAAAGCC	-	-	-	-	-	-	2 invalid_coords	Fail/lacking	recovered		recovered no valid hairpins	-	-	-	-	-	-	not evaluated: hairpin invalid	-	-	-
PID0714	Wang2016-nz	Fugra	Fg-JS-milR19		-	AACM00000000.2_scaffolds	-	-	-	AAGGAGGGCGAGCGGGAA	-	-	-	-	-	-	2 invalid_coords	Fail/lacking	recovered		recovered no valid hairpins	-	-	-	-	-	-	not evaluated: hairpin invalid	-	-	-
PID0715	Wang2016-nz	Fugra	Fg-JS-milR20		-	AACM00000000.2_scaffolds	-	-	-	CAGAGCGGGAGACAAGA	-	-	-	-	-	-	2 invalid_coords	Fail/lacking	recovered		recovered no valid hairpins	-	-	-	-	-	-	not evaluated: hairpin invalid	-	-	-
PID0716	Wang2016-nz	Fugra	Fg-JS-milR21		-	AACM00000000.2_scaffolds	-	-	-	GGGACGGGAGAGAGCCA	-	-	-	-	-	-	2 invalid_coords	Fail/lacking	recovered		recovered no valid hairpins	-	-	-	-	-	-	not evaluated: hairpin invalid	-	-	-
PID0717	Wang2016-nz	Fugra	Fg-JS-milR22		-	AACM00000000.2_scaffolds	-	-	-	CGGCGGGGACCGGCGG	-	-	-	-	-	-	2 invalid_coords	Fail/lacking	recovered		recovered no valid hairpins	-	-	-	-	-	-	not evaluated: hairpin invalid	-	-	-
PID0718	Wang2016-nz	Fugra	Fg-JS-milR23		-	AACM00000000.2_scaffolds	-	-	-	GCAGACGAGACGAC	-	-	-	-	-	-	2 invalid_coords	Fail/lacking	recovered		recovered no valid hairpins	-	-	-	-	-	-	not evaluated: hairpin invalid	-	-	-
PID0719	Wang2016-nz	Fugra	Fg-JS-milR24		-	AACM00000000.2_scaffolds	-	-	-	ACACGAGGCGGCGCCA	-	-	-	-	-	-	2 invalid_coords	Fail/lacking	recovered		recovered no valid hairpins	-	-	-	-	-	-	not evaluated: hairpin invalid	-	-	-
PID0720	Wang2016-nz	Fugra	Fg-JS-milR25		-	AACM00000000.2_scaffolds	-	-	-	AGGAGAACGAGGAC	-	-	-	-	-	-	2 invalid_coords	Fail/lacking	recovered		recovered no valid hairpins	-	-	-	-	-	-	not evaluated: hairpin invalid	-	-	-
PID0721	Wang2016-nz	Fugra	Fg-JS-milR26		CM000576.1:1800564-1800605:-	AACM00000000.2_scaffolds	CM000576.1:1800568-1800601:-	GCA_000240135.3_ASM24013v3	gene, TE	GGAGCAGAGGGC	FALSE	AUUGUUGGAGCAGAGGGCGAUCUCGGGAUCUUGUGCAAUAAU	(((((((.(..(((...((....))...)))..).)))))))	-9.4	[4, 17, 24, 37]	33	2 invalid_coords	Fail/lacking	recovered		valid	1-fail					Y	PCG-CDS-exon	N	Not tested: not intergenic	4
PID0722	Wang2016-nz	Fugra	Fg-JS-milR27		-	AACM00000000.2_scaffolds	-	-	-	GCGGAGGGACGAA	-	-	-	-	-	-	2 invalid_coords	Fail/lacking	recovered		recovered no valid hairpins	-	-	-	-	-	-	not evaluated: hairpin invalid	-	-	-
PID0723	Wang2016-nz	Fugra	Fg-JS-milR28		-	AACM00000000.2_scaffolds	-	-	-	ACGACGACGGAAGGCGGCG	-	-	-	-	-	-	2 invalid_coords	Fail/lacking	recovered		recovered no valid hairpins	-	-	-	-	-	-	not evaluated: hairpin invalid	-	-	-
PID0724	Wang2016-nz	Fugra	Fg-JS-milR29		-	AACM00000000.2_scaffolds	-	-	-	AAGCGGACGGAGAGGCC	-	-	-	-	-	-	2 invalid_coords	Fail/lacking	recovered		recovered no valid hairpins	-	-	-	-	-	-	not evaluated: hairpin invalid	-	-	-
PID0725	Wang2016-nz	Fugra	Fg-JS-milR30		-	AACM00000000.2_scaffolds	-	-	-	GGAGACAAGACGGAGCCA	-	-	-	-	-	-	2 invalid_coords	Fail/lacking	recovered		recovered no valid hairpins	-	-	-	-	-	-	not evaluated: hairpin invalid	-	-	-
PID0726	Wang2016-nz	Fugra	Fg-JS-milR31		-	AACM00000000.2_scaffolds	-	-	-	AACGAAGAGGGCCGAGGGAA	-	-	-	-	-	-	2 invalid_coords	Fail/lacking	recovered		recovered no valid hairpins	-	-	-	-	-	-	not evaluated: hairpin invalid	-	-	-
PID0727	Wang2016-nz	Fugra	Fg-JS-milR32		-	AACM00000000.2_scaffolds	-	-	-	CGAGAAGCGGCAGAAGA	-	-	-	-	-	-	2 invalid_coords	Fail/lacking	recovered		recovered no valid hairpins	-	-	-	-	-	-	not evaluated: hairpin invalid	-	-	-
PID0728	Wang2016-nz	Fugra	Fg-JS-milR33		-	AACM00000000.2_scaffolds	-	-	-	GGGGAGAGAGAGACACGG	-	-	-	-	-	-	2 invalid_coords	Fail/lacking	recovered		recovered no valid hairpins	-	-	-	-	-	-	not evaluated: hairpin invalid	-	-	-
PID0729	Wang2016-nz	Fugra	Fg-JS-milR34		-	AACM00000000.2_scaffolds	-	-	-	GACGGAACCAAGGGGAGCA	-	-	-	-	-	-	2 invalid_coords	Fail/lacking	recovered		recovered no valid hairpins	-	-	-	-	-	-	not evaluated: hairpin invalid	-	-	-
PID0730	Wang2016-nz	Fugra	Fg-JS-milR35		-	AACM00000000.2_scaffolds	-	-	-	CGACACGCAGAACCAAGCC	-	-	-	-	-	-	2 invalid_coords	Fail/lacking	recovered		recovered no valid hairpins	-	-	-	-	-	-	not evaluated: hairpin invalid	-	-	-
PID0731	Wang2016-nz	Fugra	Fg-JS-milR36		-	AACM00000000.2_scaffolds	-	-	-	GACGAGGGAGCAGGGA	-	-	-	-	-	-	2 invalid_coords	Fail/lacking	recovered		recovered no valid hairpins	-	-	-	-	-	-	not evaluated: hairpin invalid	-	-	-
PID0732	Wang2016-nz	Fugra	Fg-JS-milR37		-	AACM00000000.2_scaffolds	-	-	-	AAGAAAGGAGCAACCAGGAA	-	-	-	-	-	-	2 invalid_coords	Fail/lacking	recovered		recovered no valid hairpins	-	-	-	-	-	-	not evaluated: hairpin invalid	-	-	-
PID0733	Wang2016-nz	Fugra	Fg-JS-milR38		-	AACM00000000.2_scaffolds	-	-	-	GGAGGAGGGGAGGAGGAGGA	-	-	-	-	-	-	2 invalid_coords	Fail/lacking	recovered		recovered no valid hairpins	-	-	-	-	-	-	not evaluated: hairpin invalid	-	-	-
PID0734	Wang2016-nz	Fugra	Fg-JS-milR39		CM000577.1:1433430-1433511:-	AACM00000000.2_scaffolds	CM000577.1:1433453-1433485:-	GCA_000240135.3_ASM24013v3	gene, TE	GGAGAAGAGGAGAAAG	FALSE	GGGCUGGGAAAUGGGACGGCAAUGACUAACGGCAUCACAGGAUGGAGAAGAGGAGAAAGGCAAUGCUGGAUAUGCCCAGUCU	((((((((..(((...(((((.((.((.....((((....))))..............)))).)))))..))).))))))))	-22	[26, 34, 41, 58]	32	2 invalid_coords	Fail/lacking	recovered		valid	1-fail					Y	PCG-CDS-exon	N	Not tested: not intergenic	4
PID0735	Wang2016-nz	Fugra	Fg-JS-milR40		-	AACM00000000.2_scaffolds	-	-	-	GCGAAGGGGAAGAAGGGC	-	-	-	-	-	-	2 invalid_coords	Fail/lacking	recovered		recovered no valid hairpins	-	-	-	-	-	-	not evaluated: hairpin invalid	-	-	-
PID0736	Wang2016-nz	Fugra	Fg-JS-milR41		-	AACM00000000.2_scaffolds	-	-	-	GAGCGGGCGAGAGACGCG	-	-	-	-	-	-	2 invalid_coords	Fail/lacking	recovered		recovered no valid hairpins	-	-	-	-	-	-	not evaluated: hairpin invalid	-	-	-
PID0737	Wang2016-nz	Fugra	Fg-JS-milR42		-	AACM00000000.2_scaffolds	-	-	-	CGGAGAACGGACGGCGC	-	-	-	-	-	-	2 invalid_coords	Fail/lacking	recovered		recovered no valid hairpins	-	-	-	-	-	-	not evaluated: hairpin invalid	-	-	-
PID0738	Wang2016-nz	Fugra	Fg-JS-milR43		CM000574.1:1064031-1064306:+	AACM00000000.2_scaffolds	CM000574.1:1064039-1064298:+	GCA_000240135.3_ASM24013v3	gene, TE	GGGAAGAAGAAGACGG	FALSE	CCUCAUAUCCAAGUUAACCUAAUUACUUGACUUGAUCGCAUAAGACGAAGGUCGGGAUCGUCGGGAUAGUCGUCUGGAGCAAUGGAUGUCGAAUCGCAGAGAGAAGGGAGGGAAGUAACACGCGACAGGGACGCCACACGGGUAAAGUGUGAAGCUUAGAACCUGAGAUCGUGAGGAAAGAGGAUAUGUGCCUUUUCAAGGUGCGAAUCUGAAGACAAAACCAAGCCGAGGAUCGAGGGGAGAGAAAAGGGAGGGAAGAAGAAGACGGAGGUGAGG	((((((.(((..(((..(((..((.(((..(((((((((...((((((...((((.....)))).....))))))...))..(((.((((((.(((((..(((((((.(.(.......(.(((((((((..((((((((.......)))))..))...)..))))...))))).)...........).).)))))))....))))).))....))))...))).......)))))))..))).))..))).............)))))).))))))	-70.5	[8, 27, 250, 267]	259	2 invalid_coords	Fail/lacking	recovered		valid	1-fail					Y	PCG-UTR-exon	N	Not tested: not intergenic	4
PID0739	Wang2016-nz	Fugra	Fg-JS-milR44		-	AACM00000000.2_scaffolds	-	-	-	CGAGGAGCAGAACAACGGG	-	-	-	-	-	-	2 invalid_coords	Fail/lacking	recovered		recovered no valid hairpins	-	-	-	-	-	-	not evaluated: hairpin invalid	-	-	-
PID0740	Wang2016-nz	Fugra	Fg-JS-milR45		-	AACM00000000.2_scaffolds	-	-	-	GGCGGACGGGCACAGAG	-	-	-	-	-	-	2 invalid_coords	Fail/lacking	recovered		recovered no valid hairpins	-	-	-	-	-	-	not evaluated: hairpin invalid	-	-	-
PID0741	Wang2016-nz	Fugra	Fg-JS-milR46		-	AACM00000000.2_scaffolds	-	-	-	CACGCAACCGGGGAGAA	-	-	-	-	-	-	2 invalid_coords	Fail/lacking	recovered		recovered no valid hairpins	-	-	-	-	-	-	not evaluated: hairpin invalid	-	-	-
PID0742	Wang2016-nz	Fugra	Fg-JS-milR47		-	AACM00000000.2_scaffolds	-	-	-	GCCCCCAGGAGCCGGAC	-	-	-	-	-	-	2 invalid_coords	Fail/lacking	recovered		recovered no valid hairpins	-	-	-	-	-	-	not evaluated: hairpin invalid	-	-	-
PID0743	Wang2016-nz	Fugra	Fg-JS-milR48		-	AACM00000000.2_scaffolds	-	-	-	AGCGACGAAGCGACGG	-	-	-	-	-	-	2 invalid_coords	Fail/lacking	recovered		recovered no valid hairpins	-	-	-	-	-	-	not evaluated: hairpin invalid	-	-	-
PID0744	Wang2016-nz	Fugra	Fg-JS-milR49		-	AACM00000000.2_scaffolds	-	-	-	GCGAGACGCGAAGAGGCG	-	-	-	-	-	-	2 invalid_coords	Fail/lacking	recovered		recovered no valid hairpins	-	-	-	-	-	-	not evaluated: hairpin invalid	-	-	-
PID0745	Wang2016-nz	Fugra	Fg-JS-milR50		-	AACM00000000.2_scaffolds	-	-	-	CCCGCGAACCAACGAGA	-	-	-	-	-	-	2 invalid_coords	Fail/lacking	recovered		recovered no valid hairpins	-	-	-	-	-	-	not evaluated: hairpin invalid	-	-	-
PID0746	Wang2016-nz	Fugra	Fg-JS-milR51		-	AACM00000000.2_scaffolds	-	-	-	CCGACAACAACGAGAC	-	-	-	-	-	-	2 invalid_coords	Fail/lacking	recovered		recovered no valid hairpins	-	-	-	-	-	-	not evaluated: hairpin invalid	-	-	-
PID0747	Wang2016-nz	Fugra	Fg-JS-milR52		-	AACM00000000.2_scaffolds	-	-	-	AAGGGGGGGGAGAAGA	-	-	-	-	-	-	2 invalid_coords	Fail/lacking	recovered		recovered no valid hairpins	-	-	-	-	-	-	not evaluated: hairpin invalid	-	-	-
PID0748	Wang2016-nz	Fugra	Fg-JS-milR53		CM000577.1:4525462-4525606:-	AACM00000000.2_scaffolds	CM000577.1:4525483-4525584:-	GCA_000240135.3_ASM24013v3	gene, TE	GAGACAGAGGAAGA	FALSE	UUGAGGGAUUGACGUGUACGUCCCUCCUGCGACCUGGACCUAGCAAUGCGAAGGAACUCUACACUAAGACUGAGUGGGAAGUCGACAUUGCAAGCGCAAUAGCAGGUGUAGAGACAGAGGAAGAGGAUACAGAGUCUGACCUGGA	((.(((....(((.(((..(((((((((..(.((((.((((.(((((((((....((((............))))......))).))))))..((......)))))).))).).)..))).)).)))))))..)))...))).))	-40.8	[22, 35, 108, 123]	101	2 invalid_coords	Fail/lacking	recovered		valid	1-fail					Y	PCG-CDS-exon	N	Not tested: not intergenic	4
PID0749	Wang2016-nz	Fugra	Fg-JS-milR54		-	AACM00000000.2_scaffolds	-	-	-	CCGGACAGGCGAGAA	-	-	-	-	-	-	2 invalid_coords	Fail/lacking	recovered		recovered no valid hairpins	-	-	-	-	-	-	not evaluated: hairpin invalid	-	-	-
PID0750	Wang2016-nz	Fugra	Fg-JS-milR55		-	AACM00000000.2_scaffolds	-	-	-	GCAGGACAGAGACGACGA	-	-	-	-	-	-	2 invalid_coords	Fail/lacking	recovered		recovered no valid hairpins	-	-	-	-	-	-	not evaluated: hairpin invalid	-	-	-
PID0751	Wang2016-nz	Fugra	Fg-JS-milR56		-	AACM00000000.2_scaffolds	-	-	-	GAGGGGGGGGAAGAGG	-	-	-	-	-	-	2 invalid_coords	Fail/lacking	recovered		recovered no valid hairpins	-	-	-	-	-	-	not evaluated: hairpin invalid	-	-	-
PID0752	Wang2016-nz	Fugra	Fg-JS-milR57		-	AACM00000000.2_scaffolds	-	-	-	GGACACAGACAGACAGGACA	-	-	-	-	-	-	2 invalid_coords	Fail/lacking	recovered		recovered no valid hairpins	-	-	-	-	-	-	not evaluated: hairpin invalid	-	-	-
PID0753	Wang2016-nz	Fugra	Fg-JS-milR58		CM000577.1:1733657-1733823:+	AACM00000000.2_scaffolds	CM000577.1:1733666-1733813:+	GCA_000240135.3_ASM24013v3	gene, TE	GCGAAGAGAGGGGG	FALSE	CUUUUCGUUCAUGCUUUCUUUGCGGCGGGAUCAUGGAGAGGGCGUCGGUCCAUAACUCAUUCGCAGGUCGGGCUGUUGGGUUGAGGAUUGGCACCAAACUCGGCUCGCGAAAAUGGAAUCGUAGGCCGAGAAGACAAACAUUGGCGAAGAGAGGGGGAGACGAGGGG	(((((((((..(.((((((((((.(...............((.((((((((.(((((((...((((......))))))))))).)))))))).))...(((((((.((((........)))).)))))))...........).)))))))))).)...)))))))))	-64.6	[9, 24, 141, 156]	147	2 invalid_coords	Fail/lacking	recovered		valid	1-fail					Y	PCG-intron	N	Not tested: not intergenic	4
PID0754	Wang2016-nz	Fugra	Fg-JS-milR59		-	AACM00000000.2_scaffolds	-	-	-	AGCGACACACCAGAACGAGC	-	-	-	-	-	-	2 invalid_coords	Fail/lacking	recovered		recovered no valid hairpins	-	-	-	-	-	-	not evaluated: hairpin invalid	-	-	-
PID0755	Wang2016-nz	Fugra	Fg-JS-milR60		CM000574.1:7842576-7842609:-	AACM00000000.2_scaffolds	CM000574.1:7842576-7842609:-	GCA_000240135.3_ASM24013v3	gene, TE	GAAGCGACGGGCAA	FALSE	UGGAAGCGACGGGCAAAGCAGGGCCCAAACUCCA	((((.(....((((........))))...)))))	-8.8	[0, 15, 20, 33]	33	2 invalid_coords	Fail/lacking	recovered		valid	1-fail					Y	PCG-CDS-exon	N	Not tested: not intergenic	4
PID0756	Wang2016-nz	Fugra	Fg-JS-milR61		-	AACM00000000.2_scaffolds	-	-	-	GGGACGGGACGGGACAGGGA	-	-	-	-	-	-	2 invalid_coords	Fail/lacking	recovered		recovered no valid hairpins	-	-	-	-	-	-	not evaluated: hairpin invalid	-	-	-
PID0757	Wang2016-nz	Fugra	Fg-JS-milR62		-	AACM00000000.2_scaffolds	-	-	-	GCCGACGGGCGAACAC	-	-	-	-	-	-	2 invalid_coords	Fail/lacking	recovered		recovered no valid hairpins	-	-	-	-	-	-	not evaluated: hairpin invalid	-	-	-
PID0758	Wang2016-nz	Fugra	Fg-JS-milR63		-	AACM00000000.2_scaffolds	-	-	-	AACGGGACCGGACGCGGC	-	-	-	-	-	-	2 invalid_coords	Fail/lacking	recovered		recovered no valid hairpins	-	-	-	-	-	-	not evaluated: hairpin invalid	-	-	-
PID0759	Wang2016-nz	Fugra	Fg-JS-milR64		-	AACM00000000.2_scaffolds	-	-	-	GGGAGGCAAAGGAAAGA	-	-	-	-	-	-	3 invalid_sequence	Fail/lacking	recovered		recovered no valid hairpins	-	-	-	-	-	-	not evaluated: hairpin invalid	-	-	-
PID0760	Liu2016-tn	Culun	A-m0001		KN050534.1:4717-4802:-	GCA_000743335.1_ASM74333v1_genomic	NA:NA-NA:NA	GCA_005212705.1_ASM521270v1	none	AAGGUGUAGACGUUCUUCCGU	FALSE	GCCUAUUAAGGUGUAGACGUUCUUCCGUAAGAGGCAAUAUAUCCAUUAUUUCAUCAUAUAGGAGCAGGAGCAGGAGCAGCAUGGGC	((((((...(.(((....(((((((((((.((.(.((((.......)))).).)).))).)))...)))))....))).)))))))	-16.9	[5, 27, 57, 80]	75	1 no_coords	Fail/lacking	recovered		valid	0-no_evidence					Y	not evaluated: no published annotations	Not tested: lacking an annotation	Not tested: not intergenic	3
PID0761	Liu2016-tn	Culun	A-m0002		KN050540.1:13457-13712:-	GCA_000743335.1_ASM74333v1_genomic	NA:NA-NA:NA	GCA_005212705.1_ASM521270v1	none	UACAGAAGGUGGGGCUGUUC	FALSE	GAACAGCCCCAUCUUCCAUAGAGAGCUUAGCGCGAGAAAUCAGCUACAGAACAAUCGAUACGAUUGGUUACUCCUCAAUUUUAUGAUGACUGGACUUCUGGAAUGCUGCUUGCGGAGGUGAAGCCGCAAUCGCUAACGACUGUACAAGCAGCAUUCUAAGAGUUUCGUCAUCAUAAGACUGAAGAUUGACCAAUCAUGUUGAUUGAUUUGCAGCUGACUGCUCACGCUAUGCCAUGUACAGAAGGUGGGGCUGUUC	((((((((((((((((..((.(..((.(((((.(((...((((((.((((.(((((((((.(((((((((.((.(((.((((((((((((.((((((.((((((((((((((((..(((((........)))))..))......)))))))))))))).)))))).)))))))))))).))).)).))))))))).))))))))).)))).))))))...))).))))).))..).))..))))))))))))))))	-137	[0, 21, 234, 255]	255	1 no_coords	Fail/lacking	recovered		valid	0-no_evidence					Y	not evaluated: no published annotations	Not tested: lacking an annotation	Not tested: not intergenic	3
PID0762	Liu2016-tn	Culun	A-m0003		JFHG01002511.1:5606-5704:+	GCA_000743335.1_ASM74333v1_genomic	NA:NA-NA:NA	GCA_005212705.1_ASM521270v1	none	UAUAACGUCGUGGAUAGCUA	FALSE	AGUAUAACGUCGUGGAUAGCUACUCUAAGGACGUCUAGGUCUAUUUUCUCCUCAUGCUUCUAGAUGCUAAGUGUCGCUUGUCUAACCUCGUCUGUUAUU	......(((..(((((((((.((.((..((.((((((((...................)))))))))).)).)).)).))))).))..)))........	-20.1	[0, 21, 73, 96]	96	1 no_coords	Fail/lacking	recovered		valid	0-no_evidence					Y	not evaluated: no published annotations	Not tested: lacking an annotation	Not tested: not intergenic	3
PID0763	Liu2016-tn	Culun	A-m0004		KN050525.1:115-202:+	GCA_000743335.1_ASM74333v1_genomic	NA:NA-NA:NA	GCA_005212705.1_ASM521270v1	none	UGGGGAUCGUCCGCCGUCGCGG	FALSE	GGGCUGCUUAUAAGAGUGCGGUGGGUAGCCACUUAUAUUAGAGCAGUGCUAGGUGGGGAUCGUCCGCCGUCGCGGUGUAGGUGGACCU	((((((((((((...((((((((((...(((((((((((.....)))).)))))))......))))))).)))..))))))))).)))	-33.8	[13, 32, 51, 74]	61	1 no_coords	Fail/lacking	recovered		valid	0-no_evidence					Y	not evaluated: no published annotations	Not tested: lacking an annotation	Not tested: not intergenic	3
PID0764	Liu2016-tn	Culun	A-m0005		JFHG01002581.1:9521-9611:-	GCA_000743335.1_ASM74333v1_genomic	NA:NA-NA:NA	GCA_005212705.1_ASM521270v1	none	UAGGACGGGAAGGUAGGUUCGG	FALSE	ACGGAAGACGCGUAGCCAAUCUUCUCUAUCUCUUUCUUCCUGCUCAACAAGCAACUGGUCUAGGACGGGAAGGUAGGUUCGGUCGAGCUGU	((((..(((.((.((((.((((((((..(((....((...((((.....))))...))....))).)))))))).)))))))))...))))	-26.4	[8, 34, 58, 81]	73	1 no_coords	Fail/lacking	recovered		valid	0-no_evidence					Y	not evaluated: no published annotations	Not tested: lacking an annotation	Not tested: not intergenic	3
PID0765	Liu2016-tn	Culun	A-m0006		-	GCA_000743335.1_ASM74333v1_genomic	-	-	-	UGUGGCUAAGGCUGCGCGAGA	-	-	-	-	-	-	1 no_coords	Fail/lacking	recovered		recovered no valid hairpins	-	-	-	-	-	-	not evaluated: no published annotations	-	-	-
PID0766	Liu2016-tn	Culun	A-m0007		KN050444.1:364069-364213:-	GCA_000743335.1_ASM74333v1_genomic	NA:NA-NA:NA	GCA_005212705.1_ASM521270v1	none	UGAGUUUCUUGGUCGGCAUGU	FALSE	GACGAAGGAGGACCAAGUGAGCUCGUUGAGUUUCUUGGUCGGCAUGUUGUGUAGUUCUGAGUCGUCGAAUUUGAGAAGGUUGGGGUUGGAUUGUUCGGGCUGAGCGGGUUUUGGCUUUGUGGGUGUCUUGGGGGUCCUUGAAGUC	(((.(((((...(((((...(((((..(((((.((((.(((((.............(((((..(((.(((((.((....)).))))).)))..)))))))))).))))....)))))..)))))..)))))...)))))...)))	-39.8	[24, 46, 94, 119]	95	1 no_coords	Fail/lacking	recovered		valid	0-no_evidence					Y	not evaluated: no published annotations	Not tested: lacking an annotation	Not tested: not intergenic	3
PID0767	Liu2016-tn	Culun	A-m0008		KN050561.1:13676-13760:+	GCA_000743335.1_ASM74333v1_genomic	NA:NA-NA:NA	GCA_005212705.1_ASM521270v1	none	UAUUUGUUGGGACGAAGGGU	FALSE	AAGUUCCUUUUCUAUAUUUGUUGGGACGAAGGGUCUCUUCCUAUCAAUAGGGUCCCCUCUUUUAAAAUAGUGUCCUAAGGGACUU	(((((((((....(((((..((((((.((.(((.((((..........)))).))).))))))))...)))))...)))))))))	-22	[12, 33, 52, 73]	61	1 no_coords	Fail/lacking	recovered		valid	0-no_evidence					Y	not evaluated: no published annotations	Not tested: lacking an annotation	Not tested: not intergenic	3
PID0768	Liu2016-tn	Culun	A-m0009		KN050575.1:11542-11613:-	GCA_000743335.1_ASM74333v1_genomic	NA:NA-NA:NA	GCA_005212705.1_ASM521270v1	none	UCAGGGGUGCUGCGAUUUUG	FALSE	UACUUUGUGGUCCCAGUUCCAUUUUACAUUUUUCUUGAGGAGUUCCGUCAGGGGUGCUGCGAUUUUGGAGUA	(((((((.((((.((((.((.............(((((((....)).))))))).)))).)))).)))))))	-17.6	[5, 38, 45, 66]	61	1 no_coords	Fail/lacking	recovered		valid	0-no_evidence					Y	not evaluated: no published annotations	Not tested: lacking an annotation	Not tested: not intergenic	3
PID0769	Liu2016-tn	Culun	A-m00010		KN050575.1:4915-4988:-	GCA_000743335.1_ASM74333v1_genomic	NA:NA-NA:NA	GCA_005212705.1_ASM521270v1	none	UCAGGGGUGCUGCGAUUUUG	FALSE	UCCGUCAGGGGUGCUGCGAUUUUGGAGUAAUCCUGGAUAAAUGUCCGGUUGAAAUUCGCAAAUCCCAAGAAGGA	(((.((.(((((..(((((.(((.((......((((((....)))))))).))).))))).)))))..)).)))	-24.3	[2, 23, 50, 71]	69	1 no_coords	Fail/lacking	recovered		valid	0-no_evidence					Y	not evaluated: no published annotations	Not tested: lacking an annotation	Not tested: not intergenic	3
PID0770	Liu2016-tn	Culun	A-m00011		KN050446.1:339549-339597:-	GCA_000743335.1_ASM74333v1_genomic	NA:NA-NA:NA	GCA_005212705.1_ASM521270v1	none	UGCUGUAGUCCCUAACGGCGG	FALSE	AUUGCUGUAGUCCCUAACGGCGGGGAACAGCCUGGAGACUCGCAGUAUG	..((((((((((.(((..(((........)))))).)))).))))))..	-17.4	[0, 22, 27, 48]	48	1 no_coords	Fail/lacking	recovered		valid	0-no_evidence					Y	not evaluated: no published annotations	Not tested: lacking an annotation	Not tested: not intergenic	3
PID0771	Liu2016-tn	Culun	A-m0012		KN050560.1:12225-12311:+	GCA_000743335.1_ASM74333v1_genomic	NA:NA-NA:NA	GCA_005212705.1_ASM521270v1	none	UAGCUAGGGUCGCGGCGUAU	FALSE	AAGAUGCGAGUAGCUAGGGUCGCGGCGUAUGUGUCUUCGGCUGUAGCCUGAAGAUCGCCUCGUACACAUAUUCUAGCUUUGUAUUUU	(((((((((..(((((((((((.((((.....(((((((((....))).)))))))))).)).......))))))))))))))))))	-32	[8, 29, 52, 78]	70	1 no_coords	Fail/lacking	recovered		valid	0-no_evidence					Y	not evaluated: no published annotations	Not tested: lacking an annotation	Not tested: not intergenic	3
PID0772	Liu2016-tn	Culun	A-m0013		KN050522.1:27575-27660:+	GCA_000743335.1_ASM74333v1_genomic	NA:NA-NA:NA	GCA_005212705.1_ASM521270v1	none	UAGGAUAAUUGACUAAGGCUG	FALSE	AUCGUGCUAGGGCUAGUCUCCUCUAGGCUCCACCUAGGAUGGUGGGUGUUGAAGUCUCCUAGGAUAAUUGACUAAGGCUGUACGGU	(((((((..((.((((((((((..((((((((((......))))).......)))))...)))).....)))).)).)))))))))	-27.9	[6, 24, 57, 79]	73	1 no_coords	Fail/lacking	recovered		valid	0-no_evidence					Y	not evaluated: no published annotations	Not tested: lacking an annotation	Not tested: not intergenic	3
PID0773	Liu2016-tn	Culun	A-m0014		KN050578.1:969-1239:-	GCA_000743335.1_ASM74333v1_genomic	NA:NA-NA:NA	GCA_005212705.1_ASM521270v1	none	AAGGAGGUAGUGUCGAUAGUC	FALSE	GGAGCUAUUAUUUUCCUUCGCUAUCUCCUUCUUAUAGGCUUUAUAGGCUCUACUUAGUUCUCGCCUAUAGCUAUCUAGCUCACUAGUCCACUAGGGCUUUAUUUUUAACUUUAGGUUAAUUAGUAGAGUUAACUUUUCUAGUAUACUCUAUAUAGCCUUUAUAAGAUCUUCUCCUAGCUUAUCUAGCUUAAUUUCUAGUAGGGUGUUUUAUCCUAGAAUAAGCUUUCUUAAGGUGUAGUUUAAGUAAGGAGGUAGUGUCGAUAGUCGCUUU	.((((.((((((......((((((((((((((((.(((((.(((((((((((((.((((...(((((.((((....))))....(((((....))))).............))))).))))))))))))..(((.....))).....))))).))))).....(.(((((.....(((((((((((..(((..(((....)))....)))..)))).))))))).....))))).)....)))).))))))))))))..)))))).)))).	-71.8	[5, 30, 243, 265]	260	1 no_coords	Fail/lacking	recovered		valid	0-no_evidence					Y	not evaluated: no published annotations	Not tested: lacking an annotation	Not tested: not intergenic	3
PID0774	Liu2016-tn	Culun	A-m0015		KN050447.1:544464-544704:-	GCA_000743335.1_ASM74333v1_genomic	NA:NA-NA:NA	GCA_005212705.1_ASM521270v1	none	UGGGGAUGUAGAAAGAGGCCA	FALSE	UCGGCGUUGCGUCUGCCGUCGUUGUCGUGUGUGGUGCCCUUUUUGAUGUUCUCGCGCACAAUCUCGCCCACGAGAAGCGAGCCUGGGGCUUCUGGGCCGACGACCAUCUGGGGACAUGUGCCCAGCACGGCGUAUAUCAGAGGAUUGAAGGCGAAACUGUACAGGCCGUGCACCGGGGGCAGGUGUGCGAGAUUCGAGGCGUACGAGAGGGCCAUGGGGAUGUAGAAAGAGGCCAUGGUGA	(((.(((.((.(((.....((((.(((((......((((((((..((((((((((((((...((.((((.((....(((.(((((..((......(((..(((((.(((((..((.(((((...)))))..))...))))))).)))..)))......)).))))))))....)).))))))))))))))))......))))..))))))))))))).)))).....))).)).))).)))	-95.7	[6, 28, 212, 234]	228	1 no_coords	Fail/lacking	recovered		valid	0-no_evidence					Y	not evaluated: no published annotations	Not tested: lacking an annotation	Not tested: not intergenic	3
PID0775	Liu2016-tn	Culun	A-m0016		JFHG01002600.1:4745-4814:+	GCA_000743335.1_ASM74333v1_genomic	NA:NA-NA:NA	GCA_005212705.1_ASM521270v1	none	AAGAGAUUGUAGGCAUAUCCUC	FALSE	UGGGAAGAGAUUGUAGGCAUAUCCUCCCAAGUCCACGGAAAUGGCAGAGAUAUGUCUAAUAAAUCUCCUA	(((((.((.....((((((((((((.(((..((....))..))).)).)))))))))).....)))))))	-24.6	[2, 25, 44, 67]	65	1 no_coords	Fail/lacking	recovered		valid	0-no_evidence					Y	not evaluated: no published annotations	Not tested: lacking an annotation	Not tested: not intergenic	3
PID0776	Liu2016-tn	Culun	A-m0017		KN050487.1:11442-11499:-	GCA_000743335.1_ASM74333v1_genomic	NA:NA-NA:NA	GCA_005212705.1_ASM521270v1	none	AGGCUACUCUAGUACACCUAG	FALSE	AGGCUAGUGUGGUGAGCCUCACUACAAAUCUAACAGGCUACUCUAGUACACCUAGCCU	(((((((((((.(((((((...............)))))....)).)))).)))))))	-18.7	[3, 20, 32, 54]	51	1 no_coords	Fail/lacking	recovered		valid	0-no_evidence					Y	not evaluated: no published annotations	Not tested: lacking an annotation	Not tested: not intergenic	3
PID0777	Liu2016-tn	Culun	A-m0018		KN050433.1:688751-688811:+	GCA_000743335.1_ASM74333v1_genomic	NA:NA-NA:NA	GCA_005212705.1_ASM521270v1	none	CUUGAACUUGUGCUGACUGUAU	FALSE	GGUACCUUGAACUUGUGCUGACUGUAUUUAUAGCGACGCCUUCACCAAGCGCGAGGCUGCC	(((((((((..((((.(.(((..((.((......)).))..))))))))..))))).))))	-15.6	[3, 26, 35, 57]	54	1 no_coords	Fail/lacking	recovered		valid	0-no_evidence					Y	not evaluated: no published annotations	Not tested: lacking an annotation	Not tested: not intergenic	3
PID0778	Liu2016-tn	Culun	A-m0019		JFHG01002693.1:1284-1367:+	GCA_000743335.1_ASM74333v1_genomic	NA:NA-NA:NA	GCA_005212705.1_ASM521270v1	none	AAAUAUGGCCACAUAGGAACCU	FALSE	AGGUAUUCUAGUGCGAGCGAUACGAGCGAUAGUGCCGCGUGAAGCAGUGCUUUAAGUGCUAAAAAUAUGGCCACAUAGGAACCU	((((.((((((((...((.(((..((((..(((((.((.....)).))))).....)))).....))).))))).)))))))))	-21.8	[0, 26, 60, 83]	83	1 no_coords	Fail/lacking	recovered		valid	0-no_evidence					Y	not evaluated: no published annotations	Not tested: lacking an annotation	Not tested: not intergenic	3
PID0779	Liu2016-tn	Culun	A-m0020		KN050462.1:23520-23598:+	GCA_000743335.1_ASM74333v1_genomic	NA:NA-NA:NA	GCA_005212705.1_ASM521270v1	none	UAGGCUAGCCUCGCGAUAUAGA	FALSE	CCAUAGGCUAGCCUCGCGAUAUAGAGUAUUAUACUCAAUUUUAGGGUCUUAUUUUAUAACUCGAAGUAGCUGCUGAUGG	((((.(((.(((..(.((((((((((((....((((.......))))..)))))))))..)))..)..)))))).))))	-19.6	[1, 24, 52, 77]	76	1 no_coords	Fail/lacking	recovered		valid	0-no_evidence					Y	not evaluated: no published annotations	Not tested: lacking an annotation	Not tested: not intergenic	3
PID0780	Liu2016-tn	Culun	A-m0021		JFHG01002723.1:897-956:+	GCA_000743335.1_ASM74333v1_genomic	NA:NA-NA:NA	GCA_005212705.1_ASM521270v1	none	UAGGACACCCGGUUGGAUCGU	FALSE	GGUGCUAGGACACCCGGUUGGAUCGUCUCCAUCUGCUCCAUCUCUAUGUCUUUGAGCGCU	((((((((((((...((.((((.((........)).)))).))...))))))..))))))	-17.3	[3, 25, 32, 56]	53	1 no_coords	Fail/lacking	recovered		valid	0-no_evidence					Y	not evaluated: no published annotations	Not tested: lacking an annotation	Not tested: not intergenic	3
PID0781	Liu2016-tn	Culun	A-m0022		KN050456.1:296942-297031:-	GCA_000743335.1_ASM74333v1_genomic	NA:NA-NA:NA	GCA_005212705.1_ASM521270v1	none	UAGAUUGUAGACCGCGUGCCAG	FALSE	CGUCUGUCCUACUCACUACGCUGAGAAUGUGUUGAUCAUCGUUCGACAUGCUUUCCCAGAUAGAUUGUAGACCGCGUGCCAGAUGAGACG	((((((...(((.(.((((((((.(((.(((((((.......)))))))...))).)))......)))))...).))).)))))).....	-20	[7, 20, 58, 81]	74	1 no_coords	Fail/lacking	recovered		valid	0-no_evidence					Y	not evaluated: no published annotations	Not tested: lacking an annotation	Not tested: not intergenic	3
PID0782	Liu2016-tn	Culun	A-m0023		KN050453.1:628387-628470:+	GCA_000743335.1_ASM74333v1_genomic	NA:NA-NA:NA	GCA_005212705.1_ASM521270v1	none	UAGGCUAGCCUCGCGAUAUAGA	FALSE	CUAUUCUAUAGGCUAGCCUCGCGAUAUAGAGUAUUAUACUCAAUUUUAGGGUCUUAUUUUAUAACUUGAAGCAGCUGCUGAUAG	(((((.....((((.((.(((.(.(((((((((....((((.......))))..))))))))).).))).))))))...)))))	-17.8	[6, 29, 57, 79]	73	1 no_coords	Fail/lacking	recovered		valid	0-no_evidence					Y	not evaluated: no published annotations	Not tested: lacking an annotation	Not tested: not intergenic	3
PID0783	Liu2016-tn	Culun	A-m0024		JFHG01002859.1:311-385:-	GCA_000743335.1_ASM74333v1_genomic	NA:NA-NA:NA	GCA_005212705.1_ASM521270v1	none	UGGUCUGUGUCUGCUCGGCUUC	FALSE	GACUCGAGAAGGAGAUUGAGGAGGCGCUUGAGGGCAGGGAGUGAUGGUCUGUGUCUGCUCGGCUUCCUUUGGGUC	(((((((..(((((.(((((.((((((...(((.((........)).))))))))).))))).))))))))))))	-30.5	[11, 37, 42, 65]	54	1 no_coords	Fail/lacking	recovered		valid	0-no_evidence					Y	not evaluated: no published annotations	Not tested: lacking an annotation	Not tested: not intergenic	3
PID0784	Liu2016-tn	Culun	A-m0025		KN050472.1:152-224:-	GCA_000743335.1_ASM74333v1_genomic	NA:NA-NA:NA	GCA_005212705.1_ASM521270v1	none	UACUGUAUGUGGUGUUUCUG	FALSE	GCAGUCGCUCUUGGAGAUAGCGUACUUGCUGCUGAAUCUCUGCUACUGUAUGUGGUGUUUCUGUCUGUGCUGC	((((.(((...((((((((((((((..(..((.((...)).))..).))))))..))))))))...)))))))	-20.8	[11, 31, 41, 62]	51	1 no_coords	Fail/lacking	recovered		valid	0-no_evidence					Y	not evaluated: no published annotations	Not tested: lacking an annotation	Not tested: not intergenic	3
PID0785	Liu2016-tn	Culun	A-m0026		KN050543.1:11010-11099:+	GCA_000743335.1_ASM74333v1_genomic	NA:NA-NA:NA	GCA_005212705.1_ASM521270v1	none	UAGGAAUAAAGAGAAAGCUA	FALSE	UAGUAAUAGAGAUAAGCUUUUUAUAUUAAAUUUCUAGACCACACUUAUAGUAGAAAUAGGAAUAAAGAGAAAGCUAUCUAUAGCUUACUA	((((((...(((((.(((((((.((((..(((((((..............)))))))...))))...)))))))))))).....))))))	-16.6	[12, 31, 54, 75]	63	1 no_coords	Fail/lacking	recovered		valid	0-no_evidence					Y	not evaluated: no published annotations	Not tested: lacking an annotation	Not tested: not intergenic	3
PID0786	Liu2016-tn	Culun	A-m0027		KN050435.1:565127-565185:-	GCA_000743335.1_ASM74333v1_genomic	NA:NA-NA:NA	GCA_005212705.1_ASM521270v1	none	UUGGAGUGUUAGCAUAUGUCGA	FALSE	UAUUGGAGUGUUAGCAUAUGUCGAAUAGCCAUCUGAUUACAGAUGCUGACAAUCCAUUG	...((((.(((((((((.(((.((.(((....))).))))).))))))))).))))...	-18.5	[0, 23, 36, 58]	58	1 no_coords	Fail/lacking	recovered		valid	0-no_evidence					Y	not evaluated: no published annotations	Not tested: lacking an annotation	Not tested: not intergenic	3
PID0787	Liu2016-tn	Culun	A-m0028		KN050436.1:1162026-1162117:+	GCA_000743335.1_ASM74333v1_genomic	NA:NA-NA:NA	GCA_005212705.1_ASM521270v1	none	UAGGAAAUGCAGCAAAGAAGUU	FALSE	UGGGUAGCGCUGUAGGAAAUGCAGCAAAGAAGUUGAUAUUUGGUCGGUGUGAGAUGGAUGUGGAGUUUUUUGCAUGAUAUCUUGGGUUCUCA	((((.(((.(...((((.((.((((((((((.((.(((((..(((.......))).))))).)).)))))))).)))).))))).)))))))	-23.8	[10, 33, 62, 85]	75	1 no_coords	Fail/lacking	recovered		valid	0-no_evidence					Y	not evaluated: no published annotations	Not tested: lacking an annotation	Not tested: not intergenic	3
PID0788	Liu2016-tn	Culun	A-m0029		KN050512.1:4184-4258:-	GCA_000743335.1_ASM74333v1_genomic	NA:NA-NA:NA	GCA_005212705.1_ASM521270v1	none	UGUGGAUUUAGCAGCUAUCACU	FALSE	UGCGUUGGUAGCGCCAGUGAUCAUCAUAGAGAUAGUUUAAUCGCAGUGUGGAUUUAGCAGCUAUCACUUCCUGCA	((((.(((((((((....((((..(((...(((......)))...)))..))))..)).))))))).....))))	-15.4	[3, 27, 44, 67]	64	1 no_coords	Fail/lacking	recovered		valid	0-no_evidence					Y	not evaluated: no published annotations	Not tested: lacking an annotation	Not tested: not intergenic	3
PID0789	Liu2016-tn	Culun	A-m0030		KN050487.1:81771-81855:+	GCA_000743335.1_ASM74333v1_genomic	NA:NA-NA:NA	GCA_005212705.1_ASM521270v1	none	UACUGUAUGUGGUGUUUCUG	FALSE	CGGCGUAGUCGCUCUUAGAGAUAGCGUACUUGCUGCUAAAUCUCUGCUACUGUAUGUGGUGUUUCUGUCUGUGCUGCCUACGCUG	((((((((.(((.(.((((((((((((((..(..((.........))..).))))))..))))))))...).)).).))))))))	-25.6	[15, 35, 45, 66]	51	1 no_coords	Fail/lacking	recovered		valid	0-no_evidence					Y	not evaluated: no published annotations	Not tested: lacking an annotation	Not tested: not intergenic	3
PID0790	Liu2016-tn	Culun	A-m0031		KN050536.1:6958-7040:-	GCA_000743335.1_ASM74333v1_genomic	NA:NA-NA:NA	GCA_005212705.1_ASM521270v1	none	UACAGUAGACUCAGAGGUAG	FALSE	CCUACAGUAGACUCAGAGGUAGUACUACUGCUACUUGUCCUACUAUAGACUCAGAGGCAGUGUAUGACUUCGAGUAGCGUAGG	(((((.((..((((.(((((.((((.((((((.((.(((........)))..)).)))))))))).))))))))).)))))))	-31.6	[0, 21, 64, 82]	82	1 no_coords	Fail/lacking	recovered		valid	0-no_evidence					Y	not evaluated: no published annotations	Not tested: lacking an annotation	Not tested: not intergenic	3
PID0791	Liu2016-tn	Culun	A-m0032		KN050460.1:449034-449142:-	GCA_000743335.1_ASM74333v1_genomic	NA:NA-NA:NA	GCA_005212705.1_ASM521270v1	none	UAGAAGUAGAGGCUAGUACUUU	FALSE	UGUUGUAGAUAUAGAAGCUAGAAGUAGAGGCUAGUACUUUAAUAGCUAGAAAGUCGUUAUCAUCGCUAAUAAAAGGAAUAACCUCUACUUUUAGAUCUUUUCUAAUAUA	(((..((((...(((..(((((((((((((.((...((((..((((..................))))...))))...)).))))))))))))).)))..))))..)))	-26.5	[16, 39, 71, 94]	78	1 no_coords	Fail/lacking	recovered		valid	0-no_evidence					Y	not evaluated: no published annotations	Not tested: lacking an annotation	Not tested: not intergenic	3
PID0792	Liu2016-tn	Culun	A-m0033		KN050488.1:14069-14212:-	GCA_000743335.1_ASM74333v1_genomic	NA:NA-NA:NA	GCA_005212705.1_ASM521270v1	none	AGAUUGAGCGUAUGAGGACC	FALSE	CCGUCGCGUCUCCACUCGCUCAUAUACUUAUUCUCAGUAGAAAGCUCACUCGCGCCGUUGUCGUAGGACUCGUCGUCCUGGCCCUAAAGUAGCAUUUGGCCGAUAAGAUUGAGCGUAUGAGGACCGUAGCGGAGGCGACGGUGG	(((((((..((((.(((((((((((.((((.((((.((.(((.(((.(((.(.(((........(((((.....)))))))).)...)))))).))).)).))...)).)))).)))))))...)).)).)))))))))))...	-47.6	[17, 35, 103, 124]	107	1 no_coords	Fail/lacking	recovered		valid	0-no_evidence					Y	not evaluated: no published annotations	Not tested: lacking an annotation	Not tested: not intergenic	3
PID0793	Liu2016-tn	Culun	A-m0034		KN050491.1:56333-56395:+	GCA_000743335.1_ASM74333v1_genomic	NA:NA-NA:NA	GCA_005212705.1_ASM521270v1	none	UGGCCCGUGCGCGUAGACGCUA	FALSE	UAGUUAAUACGGGCACUAGUAAAGGCGUCGUUAUCGCCUAUUGGCCCGUGCGCGUAGACGCUA	((((...((((.((((..((..(((((.......)))))....))..)))).))))...))))	-23.1	[0, 23, 39, 62]	62	1 no_coords	Fail/lacking	recovered		valid	0-no_evidence					Y	not evaluated: no published annotations	Not tested: lacking an annotation	Not tested: not intergenic	3
PID0794	Liu2016-tn	Culun	A-m0035		KN050438.1:1199673-1199751:-	GCA_000743335.1_ASM74333v1_genomic	NA:NA-NA:NA	GCA_005212705.1_ASM521270v1	none	UAGAAGUAGAGGCUAGUACUUU	FALSE	GCUAGAAGUAGAGGCUAGUACUUUGAUAGCUAGAAAGUCGUUAUCGUCGCUAAUAAUAGGAAUAACCUCUACUUCUAGA	.(((((((((((((.((...(((((.((((..((.........))...)))).))).))...)).))))))))))))).	-25.8	[0, 23, 54, 78]	78	1 no_coords	Fail/lacking	recovered		valid	0-no_evidence					Y	not evaluated: no published annotations	Not tested: lacking an annotation	Not tested: not intergenic	3
PID0795	Liu2016-tn	Culun	A-m0036		KN050465.1:31900-31954:+	GCA_000743335.1_ASM74333v1_genomic	NA:NA-NA:NA	GCA_005212705.1_ASM521270v1	none	UGAGGACAUCGUAGAGGCUA	FALSE	CAGGUAUCGUAAAAUAUCCUUAGCUUAACAGUGAGGACAUCGUAGAGGCUACCUG	((((((((.((..((.((((((.((....)))))))).))..))..)).))))))	-12	[4, 24, 29, 50]	46	1 no_coords	Fail/lacking	recovered		valid	0-no_evidence					Y	not evaluated: no published annotations	Not tested: lacking an annotation	Not tested: not intergenic	3
PID0796	Liu2016-tn	Culun	A-m0037		KN050491.1:56040-56133:-	GCA_000743335.1_ASM74333v1_genomic	NA:NA-NA:NA	GCA_005212705.1_ASM521270v1	none	UACGCGUAGCUCUAGCUUAUUU	FALSE	ACCUAGCCUUAUACGCGUAGCUCUAGCUUAUUUAUAUUAAUAAGAGCCUAUAGUGCCUAAUUUAAGCUAGCUUUCGUUAUAGAGUUGGCUAGGU	(((((((((((((.(((.((((..((((((........(((.((.(((....).)))).)))))))))))))..))))))))....))))))))	-24.8	[9, 32, 59, 80]	71	1 no_coords	Fail/lacking	recovered		valid	0-no_evidence					Y	not evaluated: no published annotations	Not tested: lacking an annotation	Not tested: not intergenic	3
PID0797	Liu2016-tn	Culun	A-m0038		KN050518.1:11197-11781:-	GCA_000743335.1_ASM74333v1_genomic	NA:NA-NA:NA	GCA_005212705.1_ASM521270v1	none	UAGCUCUAUAGUUAUAGGGGCAA	FALSE	UACCCUCUUCUUAAGUAUAGAGGUCUUAAAGUAAUACUUAAAAUAUCACAAGUGGCAAAGAACAUGUCUUAGUGCGGAGAAUCAACCAGAAAACAUGCCUUUGUUUAUUUUAUGUUUCUCUUUGAUAUUAUUAUUAUUAUUAUUAUUAAUUAACGUCCUGUCUCAGCUGGUAGGCUAUAUAAGACGUGCAGGCUAGGCCUACAGGUAACUACGUAGUGCUAUCAAUUUGGUGUAGGUGGGGGAGGGGCCUAUCUAAAUCGAGGUGAGGCUCGUAGCCUAGUAUGGAGGAGGGUAGUAGGAGGUCUUGCGGGUGAGAGGAGAGGUAGGGUGGGUGCAGGGCGGAGCCACCUAGUGUAGGUGUUGUCCUAAUUGUCGAGGUUUCCUUUGUACCAGGCCUGC…	...(((((...(((.(((((((.(((((((((((((..((((((((((......(((((((.....))))..)))((((((.((......(((((......)))))......)).)))))).))))))).))).))))))).............(((((.(((((((((.((.((((((((((....(.(((((((((((((((....))..)))).)))..((.((((((.((((((((.......)))))))).)))))).))(((((...))))).....((((((((((.(((((((((..(((((((..(((((((..(((((..(((((((((.((((((........((((......))))........)))))))))))))))....((((…	-192.9	[0, 25, 560, 584]	584	1 no_coords	Fail/lacking	recovered		valid	0-no_evidence					Y	not evaluated: no published annotations	Not tested: lacking an annotation	Not tested: not intergenic	3
PID0798	Liu2016-tn	Culun	A-m0039		-	GCA_000743335.1_ASM74333v1_genomic	-	-	-	UUUAGACUAGUAGAAGAGUUAGC	-	-	-	-	-	-	1 no_coords	Fail/lacking	recovered		recovered no valid hairpins	-	-	-	-	-	-	not evaluated: no published annotations	-	-	-
PID0799	Liu2016-tn	Culun	A-m0040		KN050439.1:1161523-1161656:+	GCA_000743335.1_ASM74333v1_genomic	NA:NA-NA:NA	GCA_005212705.1_ASM521270v1	none	UAUAGUCGGCGUACGAAGCAU	FALSE	GACUUUAUGACGCAUUAUUGCAGUGUAGCCUUCUAGUUAAUAGGGCCGCUAAAUAGGAAGAAGAUGUAGCCUUAUAAGCUCCUCCUUGUGGCCUUAUAGUCGGCGUACGAAGCAUCUAUAGCGCUAUAGAAGUC	(((((((((.(((((...(((..(((((((..(((.....(((((((((.((..((((.(...(((......)))...)))))..))))))))))))))..))).))))..)))...)).))).))).))))))	-39	[17, 43, 92, 114]	97	1 no_coords	Fail/lacking	recovered		valid	0-no_evidence					Y	not evaluated: no published annotations	Not tested: lacking an annotation	Not tested: not intergenic	3
PID0800	Liu2016-tn	Culun	A-m0041		KN050439.1:845672-845754:-	GCA_000743335.1_ASM74333v1_genomic	NA:NA-NA:NA	GCA_005212705.1_ASM521270v1	none	UGCGGAAGUAGCAGACCGGUU	FALSE	GCUGGGGGUACUGCUGAUUGCGAUCUUGCUGCUGGCGCGCCGGAGAUGCGGAAGUAGCAGACCGGUUGUCCUGGUACCUCUGC	((.((((((((((..(((..((.(((.((((((..((((.......))))..))))))))).))...))).))))))))))))	-31.7	[17, 40, 44, 66]	49	1 no_coords	Fail/lacking	recovered		valid	0-no_evidence					Y	not evaluated: no published annotations	Not tested: lacking an annotation	Not tested: not intergenic	3
PID0801	Liu2016-tn	Culun	A-m0042		KN050485.1:65110-65184:-	GCA_000743335.1_ASM74333v1_genomic	NA:NA-NA:NA	GCA_005212705.1_ASM521270v1	none	UGUGGAUUUAGCAGCUAUCACU	FALSE	UGCGUUGGUAGCGCCAGUGAUCAUCAUAGAGAUAGUUUAAUCGCAGUGUGGAUUUAGCAGCUAUCACUUCCUGCA	((((.(((((((((....((((..(((...(((......)))...)))..))))..)).))))))).....))))	-15.4	[3, 27, 44, 67]	64	1 no_coords	Fail/lacking	recovered		valid	0-no_evidence					Y	not evaluated: no published annotations	Not tested: lacking an annotation	Not tested: not intergenic	3
PID0802	Liu2016-tn	Culun	A-m0043		KN050520.1:13455-13520:-	GCA_000743335.1_ASM74333v1_genomic	NA:NA-NA:NA	GCA_005212705.1_ASM521270v1	none	UGGGCGGCCUGUUACCACGCGA	FALSE	UGUGGCAUGGUGGGCGGCCUGUUACCACGCGAGCUUACCCGUGCGGACUCCGCUCGCGCAGCUAUA	((((((.((((((((((...((..((.((((........)))).)))).)))))))).))))))))	-27.5	[8, 31, 38, 58]	50	1 no_coords	Fail/lacking	recovered		valid	0-no_evidence					Y	not evaluated: no published annotations	Not tested: lacking an annotation	Not tested: not intergenic	3
PID0803	Liu2016-tn	Culun	A-m0044		KN050440.1:786567-786655:-	GCA_000743335.1_ASM74333v1_genomic	NA:NA-NA:NA	GCA_005212705.1_ASM521270v1	none	UCCAUGGUCGUGUCCGUGUC	FALSE	GUGUCCGUGUCCAUGGUCGUGUCCGUGUCCGUGAUCAUGUCCAUGAUCGUGCCCAUGGCCAUGGUGAGCAUGUCCAAAGGCAGUGAGGC	((.((..((((..(((.((((((((((.(((((..((((........))))..))))).)))))...))))).)))..))))..)).))	-35.1	[7, 28, 57, 81]	74	1 no_coords	Fail/lacking	recovered		valid	0-no_evidence					Y	not evaluated: no published annotations	Not tested: lacking an annotation	Not tested: not intergenic	3
[truncated: 1,475 more rows]
