# Supplementary figures and images for: Comprehensive re-analysis of hairpin small RNAs in fungi reveals loci with conserved links
Source: eLife journal article supplement (doi:10.7554/elife.83691), 2022-12-09

Loci count by species and publication

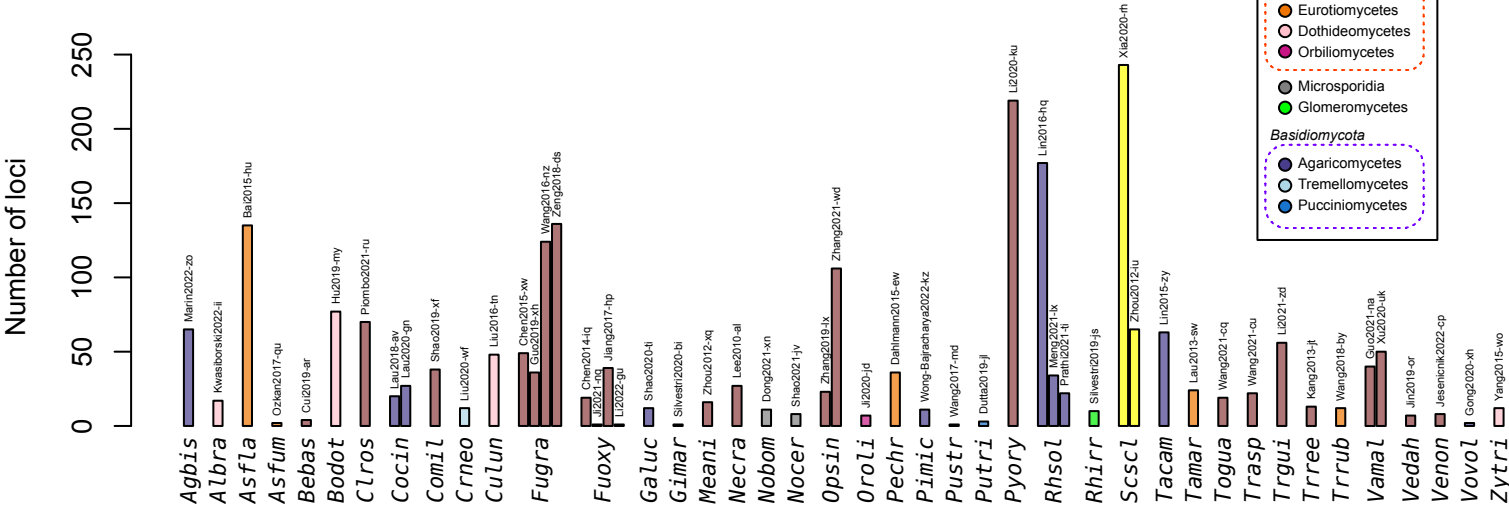

Supplement: supp [file elife_poa_e83691_Figure_1_figure_supplement_1.pdf › elife_poa_e83691_Figure_1_figure_supplement_1.pdf]

## A. Locus finding precision by alignment

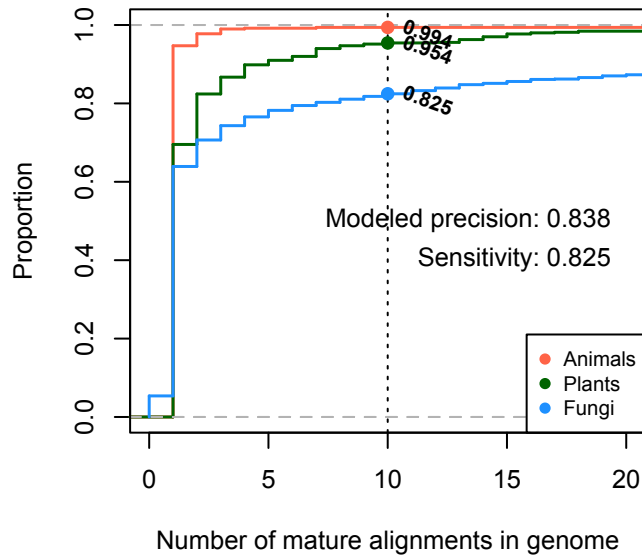

## B. Fold accuracy in known mi/milRNAs

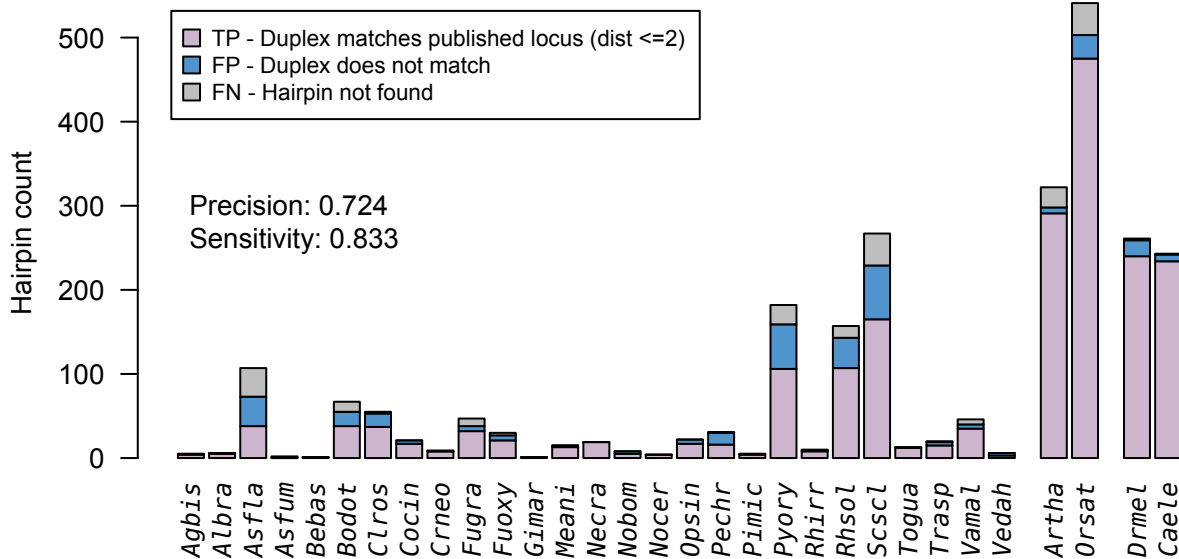

Supplement: supp [file elife_poa_e83691_Figure_1_figure_supplement_2.pdf › elife_poa_e83691_Figure_1_figure_supplement_2.pdf]

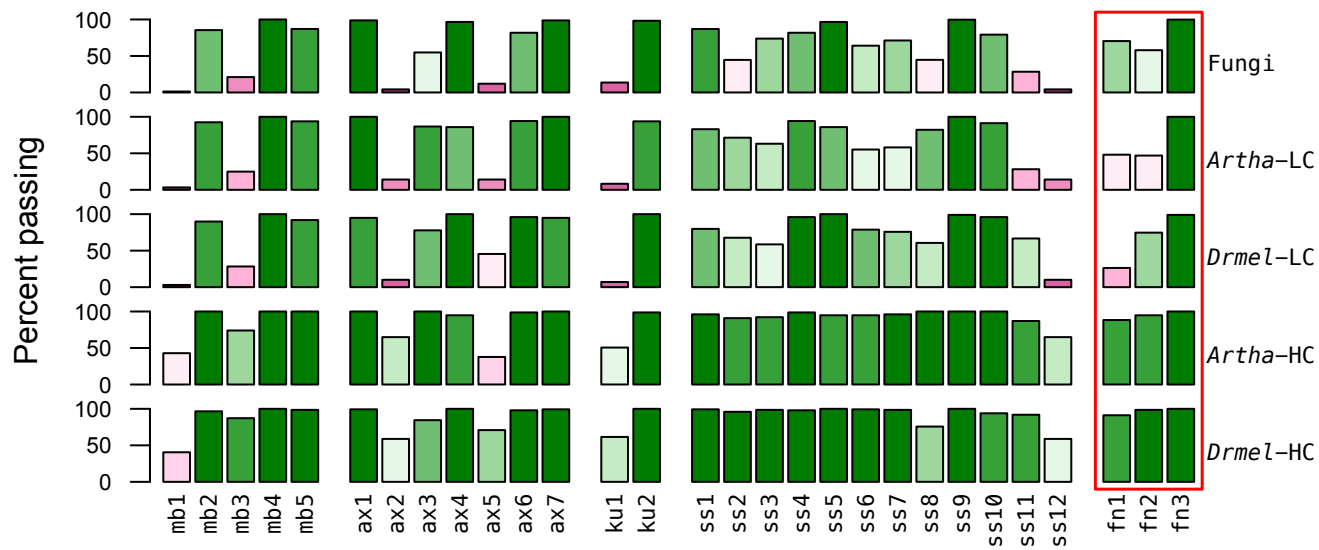

Supplement: supp [file elife_poa_e83691_Figure_2_figure_supplement_1.pdf › elife_poa_e83691_Figure_2_figure_supplement_1.pdf]

Distribution of library read depths

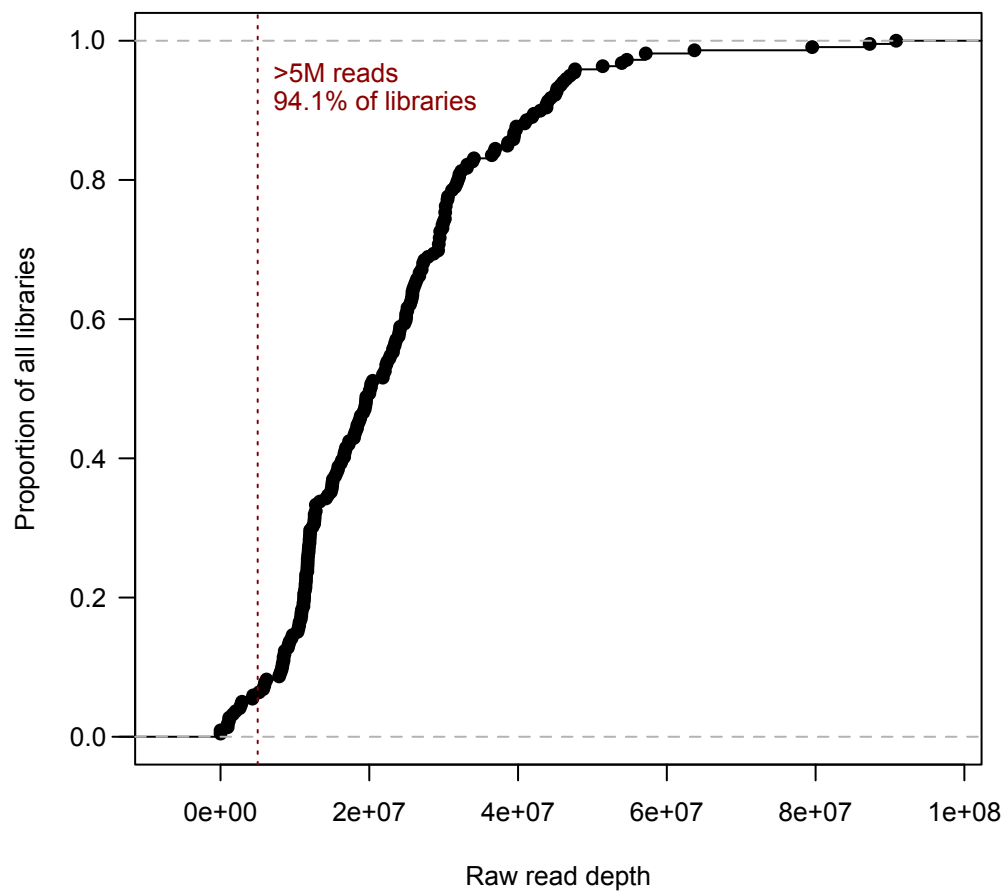

Supplement: supp [file elife_poa_e83691_Figure_2_figure_supplement_2.pdf › elife_poa_e83691_Figure_2_figure_supplement_2.pdf]

A. By source Publication

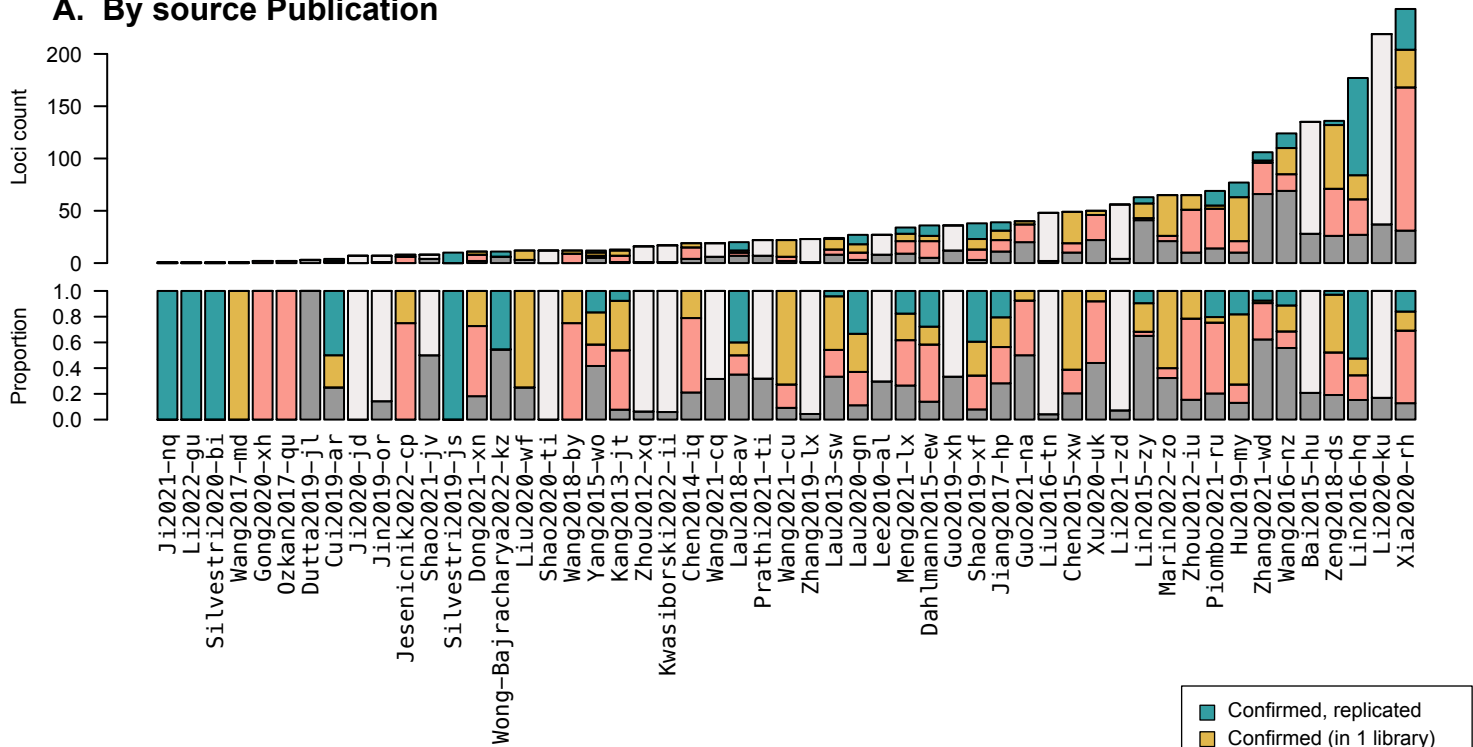

B. By annotation approach

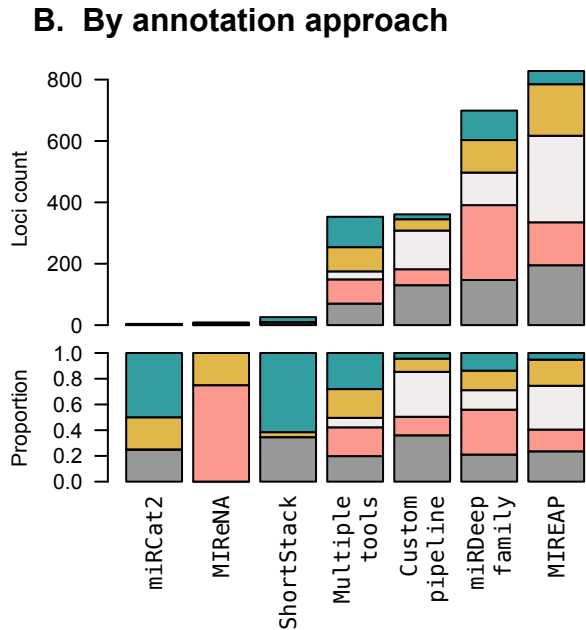

C. By most abundant Length

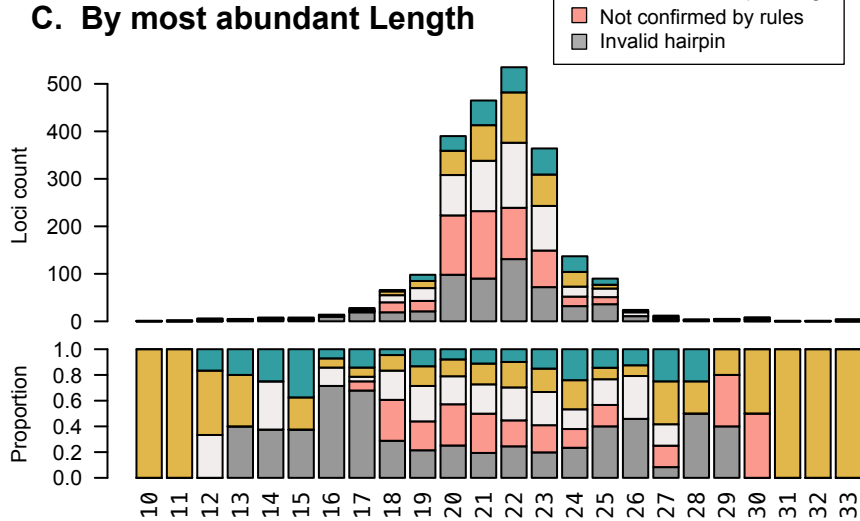

Supplement: supp [file elife_poa_e83691_Figure_2_figure_supplement_3.pdf › elife_poa_e83691_Figure_2_figure_supplement_3.pdf]
